# Supplementary material for: Transcriptomics as Precision Medicine to Classify <em>In Vivo</em> Models of Dietary-Induced Atherosclerosis at Cellular and Molecular Levels
Source: Preprints.org preprint supplement (doi:10.20944/preprints201809.0082.v1), 2018-09-05
Supplement: Supplementary file 10 [file supplementary]

## Sheet: 5_CPM_cutoff_data
ID	ID	ID	ID	Counts	Counts	Counts	Counts	Counts	Counts	Counts	CPM	CPM	CPM	CPM	CPM	CPM	CPM	ES	ES	Log2	Log2	Log2	Log2	Log2	Log2	Log2	Log2	Log2	Z-score	Z-score	Z-score	Z-score	Z-score	Z-score	Z-score	Statistics	Statistics	Statistics	Statistics	Statistics	Statistics
Rabbit gene	Mouse gene	MGI ID	Mouse gene symbol	WT_C1	WT_C2	WT_C3	NZW_HFHC1	NZW_HFHC2	NZW_HFHC3	NZW_HFHC4	WT_C1	WT_C2	WT_C3	NZW_HFHC1	NZW_HFHC2	NZW_HFHC3	NZW_HFHC4	Expression_status_mouse	Expression_status_rabbit	WT_C1	WT_C2	WT_C3	Reference_mice	NZW_HFHC1	NZW_HFHC2	NZW_HFHC3	NZW_HFHC4	Reference_rabbits	WT_C1	WT_C2	WT_C3	NZW_HFHC1	NZW_HFHC2	NZW_HFHC3	NZW_HFHC4	T-statistic	p_value	BH correction	mouse_mean	rabbit_mean	Difference
ENSOCUG00000009559	ENSMUSG00000042208	MGI:1918925	0610010F05Rik	888	2006	1060	282	184	159	281	16.477	32.672	15.633	4.872	3.394	3.597	5.597	P	A	4.04237	5.02999	3.96652	4.34629	2.28447	1.76318	1.84694	2.48466	2.09481	0.05113	0.568153	0.0114182	-0.742358	-0.959644	-0.924732	-0.658914	4.2138	0.121717	0.185629	0.3095	-0.8215	1.131
ENSOCUG00000025664	ENSMUSG00000020831	MGI:1915609	0610010K14Rik	79	83	111	9975	9477	6927	7249	1.466	1.352	1.637	172.329	174.833	156.723	144.388	A	P	0.551738	0.434928	0.711083	0.565917	7.42902	7.44983	7.29207	7.1738	7.33618	-1.77623	-1.83738	-1.69281	1.402	1.41067	1.34492	1.29562	-78.04	1.72969e-05	0.00116838	-1.8065	1.3635	-3.17
ENSOCUG00000029069	ENSMUSG00000107002	MGI:1913301	0610012G03Rik	287	414	369	172	212	161	66	5.325	6.743	5.442	2.971	3.911	3.643	1.315	P	A	2.41286	2.75338	2.44414	2.53679	1.57118	1.96754	1.86497	0.394631	1.44958	-0.801924	-0.623666	-0.785549	-1.03967	-0.874463	-0.917215	-1.53008	2.15502	0.0974577	0.159136	-0.713	-1.09025	0.37725
ENSOCUG00000029317	ENSMUSG00000028608	MGI:1921348	0610037L13Rik	1050	1298	1244	2917	2764	2009	2145	19.483	21.141	18.347	50.394	50.991	45.453	42.725	P	P	4.28413	4.40196	4.19744	4.29451	5.65519	5.67216	5.50632	5.417	5.56267	0.177691	0.239377	0.132307	0.662629	0.669702	0.600576	0.563346	-10.4347	0.00402153	0.0171342	0.2085	0.62425	-0.41575
ENSOCUG00000024129	ENSMUSG00000030663	MGI:1929274	1110004F10Rik	936	1575	1073	18	23	26	6	17.368	25.652	15.825	0.311	0.424	0.588	0.12	P	A	4.11832	4.68102	3.9841	4.26115	-1.68516	-1.23682	-0.765505	-3.0648	-1.68807	0.0908895	0.385466	0.0206244	-2.39698	-2.21011	-2.01365	-2.97205	10.3965	0.000589103	0.00563543	0.238	-2.39825	2.63625
ENSOCUG00000016663	ENSMUSG00000021023	MGI:1913382	1110008L16Rik	187	238	241	931	513	558	891	3.47	3.876	3.554	16.084	9.464	12.625	17.747	A	P	1.79485	1.95471	1.82956	1.85971	4.00756	3.24243	3.65818	4.14952	3.76442	-1.12546	-1.04177	-1.10729	-0.0241392	-0.34306	-0.169769	0.0350331	-10.1923	0.000566199	0.00557035	-1.0835	-0.1255	-0.958
ENSOCUG00000015982	ENSMUSG00000039195	MGI:1920987	1110008P14Rik	481	726	640	1326	1772	1088	331	8.925	11.825	9.439	22.908	32.69	24.616	6.593	P	P	3.15785	3.56371	3.2386	3.32005	4.51779	5.03078	4.62152	2.72092	4.22275	-0.411921	-0.19945	-0.369651	0.188535	0.402362	0.231773	-0.560436	-1.55549	0.195778	0.265116	-0.3055	0.06575	-0.37125
ENSOCUG00000006623	ENSMUSG00000045237	MGI:1915868	1110012L19Rik	254	306	175	1388	1190	966	770	4.713	4.984	2.581	23.979	21.953	21.856	15.337	A	P	2.23664	2.31728	1.36788	1.97393	4.58371	4.45636	4.44993	3.93895	4.35724	-0.894178	-0.851965	-1.34898	0.216014	0.162932	0.160253	-0.0527357	-15.7446	0.000181197	0.0030867	-0.873	0.1215	-0.9945
ENSOCUG00000002066	ENSMUSG00000040591	MGI:1915079	1110051M20Rik	367	916	451	456	589	352	353	6.81	14.919	6.651	7.878	10.866	7.964	7.031	P	P	2.76759	3.89909	2.73365	3.13345	2.97781	3.44174	2.99349	2.81376	3.0567	-0.616222	-0.0238784	-0.633992	-0.45336	-0.259984	-0.446826	-0.521739	0.33358	0.79206	0.82479	-0.32	-0.4205	0.1005
ENSOCUG00000024578	ENSMUSG00000035171	MGI:1913456	1110059E24Rik	396	470	348	360	329	373	384	7.348	7.655	5.132	6.219	6.069	8.439	7.649	P	P	2.87731	2.93641	2.35961	2.72444	2.63677	2.60156	3.07709	2.9352	2.81265	-0.558783	-0.527849	-0.829803	-0.595511	-0.610189	-0.411979	-0.471121	-0.419419	0.699102	0.741405	-0.5435	-0.52225	-0.02125
ENSOCUG00000000929	ENSMUSG00000032551	MGI:1913452	1110059G10Rik	242	369	260	607	451	400	537	4.49	6.01	3.834	10.487	8.32	9.05	10.696	A	P	2.16682	2.58737	1.93904	2.23107	3.39047	3.0566	3.17791	3.41901	3.261	-0.930729	-0.710573	-1.04998	-0.281353	-0.420519	-0.369953	-0.269456	-4.19243	0.113305	0.176622	-0.821	-0.33525	-0.48575
ENSOCUG00000008069	ENSMUSG00000078570	MGI:1916170	1110065P20Rik	77	106	85	348	597	376	174	1.429	1.726	1.254	6.012	11.014	8.507	3.466	A	P	0.514744	0.787809	0.326058	0.542871	2.58786	3.4612	3.08864	1.79318	2.73272	-1.7956	-1.65265	-1.89438	-0.615898	-0.251871	-0.407162	-0.947139	-7.02338	0.00235467	0.0120411	-1.7245	-0.5555	-1.169
ENSOCUG00000012616	ENSMUSG00000045414	MGI:1916111	1190002N15Rik	678	772	749	692	444	491	743	12.58	12.574	11.046	11.955	8.191	11.109	14.799	P	P	3.6531	3.65235	3.46549	3.59031	3.57955	3.03403	3.47363	3.88745	3.49367	-0.152657	-0.153051	-0.250871	-0.202543	-0.429925	-0.24669	-0.0742005	1.16114	0.329582	0.397599	-0.153	-0.2385	0.0855
ENSOCUG00000015658	ENSMUSG00000051319	MGI:1915135	1500011K16Rik	296	375	344	200	245	170	77	5.492	6.108	5.073	3.455	4.52	3.846	1.534	P	A	2.45741	2.61064	2.34293	2.47033	1.78878	2.17625	1.94345	0.617023	1.63137	-0.778604	-0.698391	-0.838534	-0.948975	-0.787466	-0.884505	-1.43739	1.83658	0.152061	0.218801	-0.7385	-1.0145	0.276
ENSOCUG00000026304	ENSMUSG00000026051	MGI:1926146	1500015O10Rik	485	381	328	346	276	204	230	8.999	6.205	4.837	5.978	5.092	4.615	4.581	P	P	3.1698	2.63354	2.27422	2.69252	2.57955	2.34814	2.20648	2.19573	2.33247	-0.405666	-0.686402	-0.874506	-0.619364	-0.71582	-0.774867	-0.779349	1.21648	0.417775	0.48131	-0.546	-0.72225	0.17625
ENSOCUG00000023434	ENSMUSG00000050088	MGI:1915162	1600012H06Rik	708	939	833	0	0	0	0	13.137	15.294	12.285	0	0	0	0	P	A	3.71556	3.93487	3.61884	3.75642	-5.85508	-5.76038	-5.46595	-5.64976	-5.68279	-0.119957	-0.00514867	-0.170592	-4.1351	-4.09563	-3.9729	-4.04952	59.5245	0.000590033	0.00563543	-0.0625	-4.0635	4.001
ENSOCUG00000002865	ENSMUSG00000054676	MGI:1919494	1600014C10Rik	549	987	638	288	325	197	150	10.187	16.076	9.409	4.976	5.996	4.457	2.988	P	A	3.34862	4.00679	3.23408	3.52983	2.31484	2.58391	2.15611	1.57906	2.15848	-0.312053	0.0325043	-0.372015	-0.729698	-0.617545	-0.795863	-1.03639	3.38232	0.10812	0.1707	-0.1395	-0.795	0.6555
ENSOCUG00000013504	ENSMUSG00000032300	MGI:1921461	1700017B05Rik	848	1127	1213	1273	1156	1006	495	15.735	18.356	17.889	21.992	21.326	22.761	9.86	P	P	3.97588	4.19816	4.16103	4.11169	4.45894	4.41454	4.50847	3.30152	4.17087	0.0163194	0.132685	0.113248	0.164005	0.145501	0.184652	-0.31843	0.225056	0.833171	0.860877	0.0745	0.04425	0.03025
ENSOCUG00000011248	ENSMUSG00000019797	MGI:1915101	1700021F05Rik	322	449	333	346	312	252	304	5.975	7.313	4.911	5.978	5.756	5.701	6.055	P	P	2.57887	2.87046	2.29605	2.58179	2.57955	2.52502	2.51133	2.59816	2.55352	-0.715018	-0.562371	-0.86308	-0.619364	-0.642093	-0.647797	-0.611605	-0.107149	0.931707	0.944524	-0.6385	-0.63025	-0.00825
ENSOCUG00000003988	ENSMUSG00000032666	MGI:1916649	1700025G04Rik	1054	2280	1056	104	72	84	46	19.557	37.135	15.574	1.797	1.328	1.9	0.916	P	A	4.28962	5.21471	3.96106	4.48846	0.84536	0.409541	0.926372	-0.126202	0.513768	0.180563	0.664851	0.00856279	-1.34221	-1.52387	-1.30844	-1.74718	7.26038	0.0470671	0.0952407	0.423	-1.48025	1.90325
ENSOCUG00000012726	ENSMUSG00000027327	MGI:1914576	1700037H04Rik	437	678	574	1910	1716	1326	566	8.109	11.043	8.465	32.997	31.657	30.001	11.274	P	P	3.01945	3.46503	3.08157	3.18868	5.04428	4.98445	4.90692	3.49489	4.60764	-0.484376	-0.251112	-0.451852	0.407988	0.383051	0.350734	-0.237828	-3.05952	0.0409555	0.0867919	-0.3675	0.226	-0.5935
ENSOCUG00000005763	ENSMUSG00000094103	MGI:3714351	1700047I17Rik2	25	31	18	523	649	513	674	0.464	0.505	0.265	9.035	11.973	11.607	13.425	A	P	-1.10819	-0.985915	-1.91341	-1.33584	3.17559	3.58169	3.53687	3.74684	3.51025	-2.64521	-2.5812	-3.06675	-0.370922	-0.201649	-0.220332	-0.132811	-40.0393	2.53361e-06	0.000512888	-2.613	-0.2315	-2.3815
ENSOCUG00000001684	ENSMUSG00000040822	MGI:1920893	1700123O20Rik	330	423	399	1684	1292	1236	1307	6.123	6.89	5.884	29.093	23.835	27.964	26.033	P	P	2.61428	2.7844	2.55691	2.65186	4.8626	4.57501	4.80552	4.70228	4.73635	-0.696483	-0.607423	-0.726515	0.332259	0.212386	0.308468	0.265436	-17.9964	0.0054063	0.0210685	-0.6515	0.27925	-0.93075
ENSOCUG00000015528	ENSMUSG00000022507	MGI:1916303	1810013L24Rik	2233	3570	2830	1634	1093	1065	1806	41.433	58.146	41.737	28.229	20.164	24.096	35.972	P	P	5.37273	5.8616	5.38325	5.53919	4.81911	4.33369	4.59069	5.16882	4.72808	0.747574	1.0035	0.753086	0.314134	0.111802	0.218924	0.459899	4.05851	0.0716801	0.127937	0.876	0.27625	0.59975
ENSOCUG00000024948	ENSMUSG00000078784	MGI:1916376	1810022K09Rik	413	569	459	517	404	389	472	7.663	9.267	6.769	8.932	7.453	8.801	9.401	P	P	2.93796	3.21217	2.75902	2.96972	3.15894	2.89783	3.13768	3.23288	3.10683	-0.527037	-0.383483	-0.620712	-0.377861	-0.486698	-0.386722	-0.347041	-0.707217	0.580086	0.633134	-0.455	-0.39975	-0.05525
ENSOCUG00000015277	ENSMUSG00000044148	MGI:1916405	1810030O07Rik	725	1048	858	230	184	148	168	13.452	17.069	12.654	3.973	3.394	3.348	3.346	P	A	3.74979	4.09331	3.6615	3.83487	1.99041	1.76318	1.74351	1.74255	1.80991	-0.102036	0.0777962	-0.148258	-0.864929	-0.959644	-0.967843	-0.968241	9.93322	0.0459475	0.0937654	-0.012	-0.94025	0.92825
ENSOCUG00000027171	ENSMUSG00000054091	MGI:1914954	1810037I17Rik	611	841	606	0	0	0	0	11.337	13.698	8.937	0	0	0	0	P	A	3.50299	3.77585	3.15984	3.47956	-5.85508	-5.76038	-5.46595	-5.64976	-5.68279	-0.231241	-0.0883959	-0.410879	-4.1351	-4.09563	-3.9729	-4.04952	49.0924	0.00217602	0.0114341	-0.1595	-4.0635	3.904
ENSOCUG00000027517	ENSMUSG00000035372	MGI:1919306	1810055G02Rik	399	483	489	2473	2419	1831	1974	7.403	7.867	7.212	42.724	44.626	41.426	39.319	P	P	2.8882	2.97577	2.85036	2.90478	5.41697	5.47981	5.37247	5.29714	5.3916	-0.553083	-0.507242	-0.572895	0.563333	0.589528	0.544786	0.513388	-38.521	0.000557577	0.00554556	-0.53	0.55275	-1.08275
ENSOCUG00000000678	ENSMUSG00000021458	MGI:1919311	2010111I01Rik	6956	9278	9292	831	993	715	648	129.069	151.113	137.039	14.356	18.319	16.177	12.907	P	P	7.012	7.23949	7.09844	7.11664	3.84362	4.19527	4.01585	3.69009	3.93621	1.60574	1.72483	1.65099	-0.0924699	0.0541019	-0.0206808	-0.156468	22.9943	0.00104101	0.00748743	1.6655	-0.05375	1.71925
ENSOCUG00000008836	ENSMUSG00000021550	MGI:1917403	2210016F16Rik	603	682	635	1647	1337	1344	1162	11.189	11.108	9.365	28.454	24.665	30.408	23.145	P	P	3.48397	3.47352	3.22728	3.39492	4.83054	4.6244	4.92637	4.53263	4.72849	-0.241196	-0.246669	-0.375575	0.3189	0.232974	0.358843	0.194723	-13.7263	0.000784377	0.00641651	-0.244	0.2765	-0.5205
ENSOCUG00000025422	ENSMUSG00000029559	MGI:1919607	2210016L21Rik	473	782	547	183	262	167	105	8.777	12.737	8.067	3.162	4.833	3.778	2.091	P	A	3.13365	3.67091	3.01206	3.27221	1.66062	2.27304	1.91776	1.06448	1.72898	-0.424588	-0.143331	-0.488241	-1.00239	-0.747123	-0.895212	-1.25088	3.90779	0.0503611	0.0993636	-0.284	-0.97375	0.68975
ENSOCUG00000001921	ENSMUSG00000071252	MGI:1919621	2210408I21Rik	470	497	473	364	262	303	299	8.721	8.095	6.976	6.288	4.833	6.855	5.956	P	P	3.12447	3.01699	2.80236	2.98128	2.65271	2.27304	2.77723	2.57424	2.56931	-0.429394	-0.485662	-0.59802	-0.588867	-0.747123	-0.536966	-0.621577	3.13839	0.0353005	0.0782338	-0.4575	-0.62375	0.16625
ENSOCUG00000002058	ENSMUSG00000020133	MGI:1913624	2310011J03Rik	418	523	539	0	0	0	0	7.756	8.518	7.949	0	0	0	0	P	A	2.95532	3.09056	2.99081	3.01223	-5.85508	-5.76038	-5.46595	-5.64976	-5.68279	-0.517949	-0.447151	-0.499368	-4.1351	-4.09563	-3.9729	-4.04952	72.0245	7.19375e-06	0.000795269	-0.4825	-4.0635	3.581
ENSOCUG00000016838	ENSMUSG00000049643	MGI:1913617	2310022A10Rik	356	443	497	311	324	269	221	6.606	7.215	7.33	5.373	5.977	6.086	4.402	P	P	2.72369	2.85105	2.87377	2.81617	2.42569	2.57947	2.60552	2.13814	2.4372	-0.639206	-0.572532	-0.560639	-0.683495	-0.619398	-0.608539	-0.803353	1.30638	0.265176	0.335156	-0.606	-0.6785	0.0725
ENSOCUG00000026967	ENSMUSG00000031983	MGI:1916801	2310022B05Rik	2345	2193	2466	1407	1846	1190	1333	43.512	35.718	36.369	24.307	34.055	26.924	26.551	P	P	5.44333	5.15858	5.18462	5.26218	4.60333	5.0898	4.7508	4.7307	4.79366	0.784536	0.635468	0.649103	0.22419	0.426964	0.285661	0.277281	4.69175	0.0565486	0.108149	0.71	0.3035	0.4065
ENSOCUG00000025634	ENSMUSG00000020441	MGI:1915112	2310033P09Rik	130	206	162	7485	6848	5391	4961	2.412	3.355	2.389	129.311	126.333	121.971	98.815	A	P	1.27033	1.74639	1.25652	1.42441	7.01471	6.98108	6.93039	6.62665	6.88821	-1.40005	-1.15083	-1.40728	1.2293	1.21529	1.19416	1.06756	-18.8839	0.0207478	0.0538601	-1.2755	1.1765	-2.452
ENSOCUG00000005291	ENSMUSG00000026319	MGI:1922832	2310035C23Rik	1586	2779	1998	1271	1236	1125	1319	29.428	45.262	29.467	21.958	22.802	25.453	26.272	P	P	4.87913	5.50024	4.88101	5.08679	4.45667	4.51108	4.66976	4.71547	4.58824	0.489178	0.814328	0.490159	0.16306	0.18574	0.251883	0.270932	2.63459	0.221074	0.290358	0.6515	0.218	0.4335
ENSOCUG00000021184	ENSMUSG00000040177	MGI:1915527	2310057M21Rik	486	718	544	10	28	12	3	9.018	11.694	8.023	0.173	0.517	0.271	0.06	P	A	3.17277	3.54773	3.00413	3.24154	-2.53315	-0.953029	-1.88098	-4.0648	-2.35799	-0.404111	-0.207819	-0.492395	-2.75045	-2.09182	-2.47861	-3.38887	8.1786	0.00180103	0.0101264	-0.306	-2.6775	2.3715
ENSOCUG00000002160	ENSMUSG00000050705	MGI:1916912	2310061I04Rik	128	187	169	715	711	497	873	2.375	3.046	2.492	12.352	13.117	11.245	17.389	A	P	1.24796	1.60678	1.31755	1.39076	3.62672	3.71332	3.49116	4.12007	3.73782	-1.41176	-1.22391	-1.37533	-0.182881	-0.146783	-0.239386	0.0227603	-10.7762	0.0126975	0.0382498	-1.318	-0.1365	-1.1815
ENSOCUG00000023982	ENSMUSG00000049760	MGI:2442174	2410015M20Rik	640	714	588	730	1015	791	379	11.875	11.629	8.672	12.612	18.725	17.896	7.549	P	P	3.56989	3.53967	3.11634	3.40863	3.65667	4.22688	4.16159	2.91629	3.74036	-0.196219	-0.212038	-0.433652	-0.170395	0.0672793	0.0400644	-0.479003	-0.541883	0.62528	0.675415	-0.204	-0.1355	-0.0685
ENSOCUG00000004672	ENSMUSG00000032840	MGI:1924042	2410131K14Rik	524	837	583	948	823	689	468	9.723	13.632	8.598	16.378	15.183	15.589	9.322	P	P	3.28138	3.76897	3.10402	3.38479	4.03366	3.92436	3.96242	3.2206	3.78526	-0.347253	-0.0919967	-0.440102	-0.0132577	-0.0588156	-0.0429554	-0.352159	-0.685056	0.569863	0.623937	-0.2195	-0.11675	-0.10275
ENSOCUG00000014627	ENSMUSG00000043391	MGI:1919440	2510009E07Rik	1895	2191	2262	1644	1849	1374	1980	35.162	35.685	33.36	28.402	34.111	31.087	39.438	P	P	5.13594	5.15726	5.06005	5.11775	4.82791	5.09215	4.95822	5.30152	5.04495	0.623616	0.634779	0.583888	0.317803	0.42794	0.372118	0.515213	5.21398	0.0126275	0.0381097	0.6295	0.40825	0.22125
ENSOCUG00000027719	ENSMUSG00000044496	MGI:1924284	2510039O18Rik	942	1321	1241	2244	2712	1850	1548	17.479	21.515	18.302	38.768	50.031	41.856	30.833	P	P	4.12754	4.4273	4.19395	4.2496	5.27678	5.64476	5.38736	4.94643	5.31383	0.0957154	0.252642	0.130483	0.504899	0.658281	0.550994	0.367201	-3.49281	0.0609425	0.114221	0.1745	0.52025	-0.34575
ENSOCUG00000001062	ENSMUSG00000059482	MGI:1914407	2610301B20Rik	343	401	284	974	1194	1108	1368	6.364	6.531	4.188	16.827	22.027	25.068	27.248	P	P	2.67002	2.70735	2.06641	2.48126	4.0727	4.4612	4.6478	4.76809	4.48745	-0.667301	-0.647762	-0.983292	0.00301278	0.16495	0.242726	0.292867	-13.0024	0.000789807	0.00642883	-0.6575	0.176	-0.8335
ENSOCUG00000013839	ENSMUSG00000010277	MGI:1919753	2610507B11Rik	8007	11379	10363	9611	5189	4589	6353	148.57	185.333	152.834	166.04	95.727	103.826	126.541	P	P	7.215	7.53397	7.25582	7.33493	7.37539	6.58086	6.69802	6.98346	6.90943	1.71201	1.879	1.73338	1.37965	1.04847	1.0973	1.21628	5.47348	0.0166167	0.0460747	1.7955	1.18525	0.61025
ENSOCUG00000007145	ENSMUSG00000034601	MGI:1924217	2700049A03Rik	540	668	614	943	769	691	889	10.02	10.88	9.055	16.291	14.187	15.634	17.707	P	P	3.32477	3.44359	3.17876	3.31571	4.02603	3.82646	3.9666	4.14628	3.99134	-0.324537	-0.262334	-0.400974	-0.0164378	-0.0996261	-0.0412124	0.0336817	-6.24861	0.0119693	0.0366487	-0.2935	-0.03075	-0.26275
ENSOCUG00000028046	ENSMUSG00000024273	MGI:1915296	2700062C07Rik	125	189	137	1104	1566	1191	1312	2.319	3.078	2.02	19.073	28.89	26.946	26.133	A	P	1.21374	1.62213	1.0147	1.28352	4.25344	4.85248	4.75201	4.70779	4.64143	-1.42967	-1.21588	-1.53387	0.0783518	0.328045	0.286166	0.267732	-12.9697	0.0138453	0.0406378	-1.323	0.24	-1.563
ENSOCUG00000021330	ENSMUSG00000053080	MGI:1919667	2700081O15Rik	1052	1459	1540	124	131	188	68	19.52	23.763	22.712	2.142	2.417	4.253	1.354	P	A	4.28688	4.57065	4.50538	4.4543	1.09912	1.27304	2.08864	0.437699	1.22462	0.179128	0.327686	0.293517	-1.23644	-1.16394	-0.823983	-1.51213	8.9889	0.000870768	0.00669562	0.2535	-1.184	1.4375
ENSOCUG00000022589	ENSMUSG00000062198	MGI:1919908	2700097O09Rik	179	205	214	446	262	256	270	3.321	3.339	3.156	7.705	4.833	5.792	5.378	A	P	1.73177	1.73937	1.65813	1.70976	2.94582	2.27304	2.53405	2.42705	2.54499	-1.15848	-1.1545	-1.19703	-0.466694	-0.747123	-0.638327	-0.682928	-8.72242	0.00315702	0.0145124	-1.1565	-0.63375	-0.52275
ENSOCUG00000005657	ENSMUSG00000031984	MGI:1913773	2810004N23Rik	518	640	585	297	131	363	74	9.612	10.424	8.628	5.131	2.417	8.213	1.474	P	A	3.26477	3.38182	3.10896	3.25185	2.35924	1.27304	3.03788	0.55969	1.80746	-0.355951	-0.294674	-0.437516	-0.711194	-1.16394	-0.428321	-1.46128	2.65	0.0742943	0.131283	-0.3255	-0.941	0.6155
ENSOCUG00000017339	ENSMUSG00000051339	MGI:1920194	2900026A02Rik	3502	3806	4604	751	703	338	613	64.98	61.989	67.9	12.974	12.969	7.647	12.21	P	P	6.02192	5.95395	6.08534	6.0204	3.69759	3.697	2.93493	3.60998	3.48488	1.08743	1.05185	1.12063	-0.153341	-0.153587	-0.471231	-0.189858	16.6466	0.000271819	0.00379883	1.0695	-0.242	1.3115
ENSOCUG00000006510	ENSMUSG00000028300	MGI:1920455	3110043O21Rik	767	1337	989	4167	2959	3781	4438	14.232	21.776	14.586	71.989	54.588	85.545	88.397	P	P	3.83104	4.44467	3.86649	4.0474	6.16971	5.77051	6.41861	6.46593	6.20619	-0.0595038	0.261735	-0.0409436	0.877094	0.710697	0.980838	1.00056	-4.54556	0.0883007	0.14865	0.101	0.8925	-0.7915
ENSOCUG00000002820	ENSMUSG00000033111	MGI:1917937	3830406C13Rik	408	590	395	123	263	188	259	7.57	9.609	5.825	2.125	4.852	4.253	5.159	P	A	2.92038	3.26446	2.54238	2.90907	1.08743	2.27854	2.08864	2.36704	1.95541	-0.536237	-0.356111	-0.734125	-1.24131	-0.744833	-0.823983	-0.70794	2.84573	0.0494635	0.09819	-0.446	-0.8795	0.4335
ENSOCUG00000013715	ENSMUSG00000062822	MGI:1914642	4833420G17Rik	1026	1292	1250	308	309	266	328	19.038	21.043	18.435	5.321	5.7	6.018	6.533	P	P	4.25077	4.39528	4.20438	4.28348	2.41171	2.51108	2.58934	2.70779	2.55498	0.160228	0.235877	0.135941	-0.689324	-0.647903	-0.615284	-0.565911	17.9676	0.00301285	0.0141081	0.198	-0.6295	0.8275
ENSOCUG00000012191	ENSMUSG00000025871	MGI:1921162	4833439L19Rik	1430	2016	1730	1023	798	552	593	26.534	32.835	25.514	17.673	14.722	12.489	11.812	P	P	4.72976	5.03717	4.67322	4.81338	4.14351	3.87986	3.64258	3.56212	3.80702	0.410978	0.571909	0.381383	0.0325289	-0.0773657	-0.17627	-0.209805	6.15555	0.025579	0.0625267	0.4915	-0.1075	0.599
ENSOCUG00000017749	ENSMUSG00000036934	MGI:1913964	4921524J17Rik	171	330	222	440	640	619	514	3.173	5.375	3.274	7.601	11.807	14.005	10.238	A	P	1.66581	2.42621	1.71108	1.93437	2.92628	3.56154	3.80785	3.35586	3.41288	-1.19301	-0.794938	-1.16931	-0.474839	-0.210047	-0.107381	-0.29578	-3.3784	0.133193	0.198743	-0.994	-0.272	-0.722
ENSOCUG00000025410	ENSMUSG00000027309	MGI:1923029	4930402H24Rik	2092	3363	2644	2367	2342	1702	1801	38.817	54.774	38.994	40.892	43.205	38.508	35.873	P	P	5.27862	5.77542	5.28517	5.44641	5.35376	5.43314	5.26707	5.16482	5.3047	0.698312	0.958388	0.701741	0.536989	0.570075	0.500853	0.458232	2.35615	0.242392	0.31245	0.828	0.5165	0.3115
ENSOCUG00000004284	ENSMUSG00000046567	MGI:1921197	4930430F08Rik	173	213	187	324	263	241	382	3.21	3.469	2.758	5.597	4.852	5.453	7.609	A	P	1.68259	1.7946	1.46356	1.64692	2.48477	2.27854	2.44694	2.92767	2.53448	-1.18423	-1.12559	-1.29889	-0.65887	-0.744833	-0.674636	-0.474261	-7.98578	0.00140612	0.00871721	-1.155	-0.63825	-0.51675
ENSOCUG00000014034	ENSMUSG00000059920	MGI:1914859	4930453N24Rik	740	951	690	901	595	583	940	13.731	15.489	10.176	15.566	10.977	13.19	18.723	P	P	3.77934	3.95319	3.34712	3.69322	3.9603	3.45636	3.72141	4.22675	3.84121	-0.0865696	0.00444202	-0.312838	-0.0438357	-0.253889	-0.143413	0.0672264	0.631895	0.562304	0.61712	-0.0415	-0.0935	0.052
ENSOCUG00000015283	ENSMUSG00000044906	MGI:1922045	4930503L19Rik	709	954	851	133	121	90	173	13.156	15.538	12.551	2.298	2.232	2.036	3.446	P	A	3.7176	3.95773	3.64968	3.77501	1.2002	1.15848	1.02591	1.78486	1.29236	-0.118891	0.00682079	-0.154445	-1.1943	-1.2117	-1.26695	-0.950605	11.6734	0.000833383	0.0065905	-0.056	-1.156	1.1
ENSOCUG00000008639	ENSMUSG00000048905	MGI:1925441	4930539E08Rik	4	6	8	989	599	402	216	0.074	0.098	0.118	17.086	11.05	9.095	4.302	A	P	-3.75204	-3.35515	-3.08333	-3.39684	4.09475	3.46603	3.18511	2.10512	3.21275	-4.02928	-3.8215	-3.67921	0.0122032	-0.24986	-0.366954	-0.817114	-17.7058	6.01928e-05	0.00202247	-3.9255	-0.3555	-3.57
ENSOCUG00000012810	ENSMUSG00000031938	MGI:1918234	4931406C07Rik	906	780	998	889	455	427	920	16.811	12.704	14.719	15.358	8.394	9.661	18.325	P	P	4.07132	3.66722	3.87956	3.8727	3.94096	3.06934	3.27215	4.19573	3.61954	0.0662861	-0.145265	-0.0341018	-0.0518986	-0.415209	-0.330674	0.0542937	0.954671	0.406855	0.471634	-0.0395	-0.186	0.1465
ENSOCUG00000002236	ENSMUSG00000066571	MGI:1924311	4931406P16Rik	1452	1824	1930	3504	2541	2108	2433	26.942	29.708	28.464	60.535	46.877	47.693	48.461	P	P	4.75178	4.89278	4.83105	4.8252	5.91971	5.5508	5.57571	5.59876	5.66124	0.422509	0.49632	0.464007	0.772886	0.619116	0.629502	0.639107	-4.00518	0.0284231	0.067168	0.4595	0.66525	-0.20575
ENSOCUG00000013097	ENSMUSG00000022179	MGI:1921609	4931414P19Rik	109	159	146	568	534	312	354	2.023	2.59	2.153	9.813	9.851	7.059	7.051	A	P	1.01614	1.37277	1.10649	1.16514	3.29467	3.30031	2.81946	2.81784	3.05807	-1.53311	-1.34642	-1.48582	-0.321287	-0.318934	-0.519365	-0.520038	-9.28614	0.0153756	0.0435396	-1.4395	-0.41975	-1.01975
ENSOCUG00000014811	ENSMUSG00000037270	MGI:2444631	4932438A13Rik	6557	8748	7332	2609	2244	1573	2262	121.666	142.481	108.133	45.073	41.398	35.589	45.055	P	P	6.92678	7.15463	6.75666	6.94602	5.4942	5.37147	5.15336	5.49362	5.37816	1.56113	1.68041	1.47207	0.595526	0.54437	0.453455	0.595283	15.7098	0.00799777	0.0273225	1.6205	0.547	1.0735
ENSOCUG00000002832	ENSMUSG00000020807	MGI:1921727	4933427D14Rik	506	633	592	853	738	509	560	9.389	10.31	8.731	14.736	13.615	11.516	11.154	P	P	3.23095	3.36595	3.12612	3.24101	3.88132	3.76709	3.52558	3.47952	3.66338	-0.373653	-0.30298	-0.428532	-0.0767568	-0.12437	-0.225039	-0.244237	-3.19547	0.042363	0.0888942	-0.3385	-0.1675	-0.171
ENSOCUG00000016461	ENSMUSG00000027942	MGI:1914027	4933434E20Rik	1148	1767	1272	1893	1307	1138	1641	21.301	28.78	18.76	32.704	24.112	25.747	32.686	P	P	4.41286	4.84697	4.22955	4.49646	5.03138	4.59166	4.68634	5.0306	4.83499	0.245084	0.472342	0.149118	0.402611	0.219327	0.258792	0.402285	0.306428	0.799237	0.831107	0.3585	0.32075	0.03775
ENSOCUG00000001886	ENSMUSG00000036046	MGI:2444899	5031439G07Rik	3212	4972	5077	3762	3188	2396	2458	59.599	80.98	74.876	64.993	58.813	54.209	48.959	P	P	5.89721	6.3395	6.22643	6.15438	6.0222	5.87805	5.76047	5.61351	5.81856	1.02215	1.25368	1.19449	0.815609	0.755523	0.706511	0.645254	3.34841	0.150423	0.216991	1.138	0.731	0.407
ENSOCUG00000008187	ENSMUSG00000057181	MGI:1917841	5730455P16Rik	801	1508	857	1194	968	994	1222	14.863	24.561	12.639	20.628	17.858	22.489	24.34	P	P	3.89362	4.61831	3.65982	4.05725	4.36651	4.15848	4.49116	4.60527	4.40535	-0.0267451	0.352635	-0.149139	0.125479	0.0387684	0.177435	0.224998	0.110754	0.928634	0.9423	0.163	0.1415	0.0215
ENSOCUG00000002186	ENSMUSG00000029089	MGI:1917842	5730480H06Rik	483	574	507	256	183	165	189	8.962	9.349	7.477	4.423	3.376	3.733	3.765	P	A	3.16384	3.2248	2.90251	3.09705	2.14492	1.75532	1.90038	1.91248	1.92827	-0.408787	-0.376875	-0.545594	-0.800526	-0.962922	-0.902457	-0.897413	13.4181	0.000203496	0.00326634	-0.393	-0.89075	0.49775
ENSOCUG00000000375	ENSMUSG00000022195	MGI:1925127	6030458C11Rik	742	1027	726	272	181	108	158	13.768	16.727	10.707	4.699	3.339	2.443	3.147	P	A	3.78323	4.06411	3.42049	3.75595	2.23238	1.73946	1.28894	1.65402	1.7287	-0.0845311	0.0625085	-0.274427	-0.76407	-0.96953	-1.15732	-1.00515	8.78247	0.00222026	0.0115304	-0.011	-0.974	0.963
ENSOCUG00000003057	ENSMUSG00000031824	MGI:2443793	6430548M08Rik	625	1804	795	3631	1924	1725	1481	11.597	29.382	11.725	62.729	35.494	39.028	29.499	P	P	3.53567	4.87687	3.55148	3.98801	5.97107	5.14951	5.28644	4.88259	5.3224	-0.214131	0.487993	-0.205856	0.794295	0.451851	0.508925	0.340594	-1.0631	0.46112	0.521609	0.137	0.524	-0.387
ENSOCUG00000007364	ENSMUSG00000056004	MGI:2443264	9330182L06Rik	241	1792	213	123	162	189	123	4.472	29.187	3.141	2.125	2.989	4.276	2.45	P	A	2.16085	4.86724	1.65138	2.89316	1.08743	1.57947	2.0963	1.29275	1.51399	-0.933857	0.482953	-1.20057	-1.24131	-1.03622	-0.820793	-1.15573	1.17312	0.444522	0.506545	-0.2255	-1.0635	0.838
ENSOCUG00000013705	ENSMUSG00000036275	MGI:2654705	9530068E07Rik	4104	4758	4583	5336	4610	3803	5695	76.15	77.495	67.59	92.185	85.046	86.042	113.435	P	P	6.25077	6.27603	6.07874	6.20185	6.52646	6.41017	6.42698	6.82572	6.54733	1.20724	1.22046	1.11718	1.02579	0.97732	0.984327	1.15053	4.38371	0.0198332	0.0522954	1.2135	1.0345	0.179
ENSOCUG00000021550	ENSMUSG00000044730	MGI:3041172	9930104L06Rik	290	386	364	153	115	43	55	5.381	6.287	5.368	2.643	2.122	0.973	1.096	P	A	2.42787	2.65235	2.42446	2.50156	1.40231	1.08511	-0.0396803	0.131596	0.644833	-0.794071	-0.676555	-0.795853	-1.11006	-1.24228	-1.71111	-1.63972	4.35249	0.0140476	0.0409717	-0.7355	-1.42575	0.69025
ENSOCUG00000010122	ENSMUSG00000022347	MGI:2152878	A1bg	2	3	2	1051	1118	902	725	0.037	0.049	0.029	18.157	20.625	20.408	14.441	A	P	-4.75204	-4.35515	-5.08333	-4.73017	4.18247	4.36632	4.35104	3.85207	4.18797	-4.55278	-4.34501	-4.72621	0.0487668	0.125401	0.119031	-0.0889481	-39.0327	0.00325166	0.0147718	-4.449	0.051	-4.5
ENSOCUG00000004728	ENSMUSG00000038884	MGI:2441788	A230050P20Rik	344	587	526	500	397	378	485	6.383	9.561	7.757	8.638	7.324	8.552	9.66	P	P	2.67422	3.25711	2.95559	2.9623	3.1107	2.87261	3.0963	3.27208	3.08792	-0.665103	-0.359961	-0.517807	-0.397967	-0.497209	-0.403972	-0.330703	-0.671918	0.61475	0.665591	-0.5125	-0.4075	-0.105
ENSOCUG00000001166	ENSMUSG00000047613	MGI:2140680	A430005L14Rik	209	257	235	437	406	355	293	3.878	4.186	3.466	7.55	7.49	8.032	5.836	A	P	1.95532	2.06551	1.79318	1.938	2.91641	2.90495	3.00573	2.54499	2.84302	-1.04145	-0.983764	-1.12633	-0.478953	-0.483729	-0.441722	-0.633767	-9.83083	0.000660491	0.00599309	-1.0125	-0.50975	-0.50275
ENSOCUG00000006673	ENSMUSG00000047878	MGI:3512453	A4galt	1122	1603	1168	144	280	166	130	20.819	26.108	17.226	2.488	5.165	3.756	2.589	P	A	4.37981	4.70645	4.10649	4.39758	1.31484	2.3689	1.90909	1.3726	1.74136	0.227782	0.398775	0.0846962	-1.14652	-0.707167	-0.898823	-1.12244	9.54938	0.00118549	0.00805429	0.3135	-0.96875	1.28225
ENSOCUG00000008109	ENSMUSG00000057715	MGI:2444149	A830018L16Rik	152	1327	172	0	2	2	0	2.82	21.613	2.537	0	0.037	0.045	0	P	A	1.49589	4.43384	1.34293	2.42422	-5.85508	-4.76038	-4.46595	-5.64976	-5.18279	-1.28197	0.256065	-1.36204	-4.1351	-3.6788	-3.55608	-4.04952	4.27516	0.134208	0.199853	-0.513	-3.855	3.342
ENSOCUG00000011288	ENSMUSG00000036678	MGI:2443767	Aaas	212	298	244	940	830	688	619	3.934	4.854	3.599	16.24	15.312	15.566	12.329	A	P	1.97588	2.27906	1.8474	2.03411	4.02144	3.93658	3.96032	3.62403	3.88559	-1.03069	-0.871973	-1.09794	-0.0183539	-0.0537225	-0.0438288	-0.184001	-9.99	0.0255051	0.0623806	-0.9515	-0.075	-0.8765
ENSOCUG00000011526	ENSMUSG00000057228	MGI:1345167	Aadat	0	0	0	350	467	582	486	0	0	0	6.047	8.615	13.168	9.68	A	P	-5.75204	-5.94011	-6.08333	-5.92516	2.59613	3.1069	3.71893	3.27505	3.17425	-5.07629	-5.17474	-5.24972	-0.612452	-0.399555	-0.144445	-0.329464	-43.7637	1.80587e-06	0.00048928	-5.1255	-0.37125	-4.75425
ENSOCUG00000013208	ENSMUSG00000021482	MGI:1913379	Aaed1	1965	1906	2038	861	801	707	609	36.461	31.044	30.057	14.875	14.777	15.996	12.13	P	P	5.18827	4.95622	4.90961	5.01803	3.89479	3.88527	3.99962	3.60053	3.84506	0.651012	0.529533	0.505129	-0.0711433	-0.0751092	-0.0274471	-0.193795	9.70675	0.0158826	0.0445089	0.5905	-0.09175	0.68225
ENSOCUG00000006644	ENSMUSG00000037257	MGI:1914189	Aagab	1156	1625	1291	1292	798	680	885	21.45	26.467	19.04	22.321	14.722	15.385	17.628	P	P	4.42288	4.72611	4.25094	4.46665	4.48031	3.87986	3.94345	4.13977	4.11085	0.250328	0.40907	0.160316	0.172914	-0.0773657	-0.0508622	0.0309699	3.18819	0.0817029	0.140201	0.3295	0.019	0.3105
ENSOCUG00000009550	ENSMUSG00000057230	MGI:1098687	Aak1	2920	4957	3670	794	507	343	628	54.181	80.736	54.125	13.717	9.353	7.76	12.509	P	P	5.75971	6.33514	5.75823	5.95103	3.77792	3.22546	2.95612	3.64486	3.40109	0.950163	1.2514	0.949389	-0.119859	-0.350135	-0.462401	-0.17532	8.10603	0.0281366	0.0666585	1.1005	-0.27675	1.37725
ENSOCUG00000025658	ENSMUSG00000035642	MGI:1913523	Aamdc	305	351	322	836	877	538	619	5.659	5.717	4.749	14.443	16.179	12.172	12.329	P	P	2.50062	2.51522	2.24758	2.42114	3.85228	4.01605	3.60552	3.62403	3.77447	-0.755983	-0.748343	-0.888449	-0.0888625	-0.0205995	-0.191718	-0.184001	-15.3579	0.000540372	0.00543557	-0.752	-0.1215	-0.6305
ENSOCUG00000023014	ENSMUSG00000006299	MGI:107809	Aamp	1659	2461	1953	2369	2698	1915	1269	30.783	40.083	28.803	40.927	49.773	43.327	25.276	P	P	4.94406	5.32492	4.84814	5.03904	5.35498	5.63729	5.43718	4.65971	5.27229	0.523164	0.722547	0.472954	0.537496	0.655169	0.57176	0.247693	0.8985	0.443204	0.505516	0.623	0.503	0.12
ENSOCUG00000005490	ENSMUSG00000027628	MGI:1915545	Aar2	596	912	730	545	540	362	379	11.059	14.854	10.766	9.415	9.962	8.19	7.549	P	P	3.46713	3.89278	3.42842	3.59611	3.23503	3.31643	3.0339	2.91629	3.12541	-0.250014	-0.0271836	-0.270277	-0.346144	-0.312215	-0.42998	-0.479003	2.14858	0.236746	0.306309	-0.1385	-0.39175	0.25325
ENSOCUG00000008872	ENSMUSG00000031960	MGI:2384560	Aars	2337	3385	2633	4464	3948	3109	3744	43.363	55.132	38.832	77.12	72.833	70.341	74.574	P	P	5.4384	5.78483	5.27916	5.5008	6.26904	6.18652	6.13629	6.2206	6.20311	0.781955	0.963312	0.698592	0.918496	0.8841	0.863162	0.898305	-0.200025	0.873512	0.895385	0.8725	0.89075	-0.01825
ENSOCUG00000021422	ENSMUSG00000023938	MGI:2681839	Aars2	299	431	411	337	240	214	139	5.548	7.02	6.061	5.822	4.428	4.842	2.769	P	A	2.47196	2.81143	2.59966	2.62768	2.54152	2.14651	2.27552	1.46918	2.10818	-0.770988	-0.593273	-0.704135	-0.635213	-0.799865	-0.746089	-1.08219	1.02651	0.375899	0.442606	-0.682	-0.81575	0.13375
ENSOCUG00000009259	ENSMUSG00000075528	MGI:1916934	Aarsd1	31	51	35	1213	1080	894	725	0.575	0.831	0.516	20.956	19.924	20.227	14.441	A	P	-0.797846	-0.267686	-0.95405	-0.673194	4.38928	4.31643	4.33819	3.85207	4.22399	-2.48274	-2.2052	-2.56452	0.134973	0.104606	0.113674	-0.0889481	-16.2357	0.0188076	0.0505083	-2.344	0.06625	-2.41025
ENSOCUG00000012192	ENSMUSG00000055923	MGI:2442517	Aasdh	326	450	440	718	577	309	495	6.049	7.329	6.489	12.404	10.645	6.991	9.86	P	P	2.59669	2.87367	2.69803	2.72279	3.63276	3.41204	2.80552	3.30152	3.28796	-0.705693	-0.560691	-0.652641	-0.180363	-0.272362	-0.525175	-0.31843	-3.0115	0.0566857	0.108359	-0.6335	-0.32375	-0.30975
ENSOCUG00000000231	ENSMUSG00000025894	MGI:1914868	Aasdhppt	511	694	495	574	357	445	499	9.482	11.303	7.3	9.916	6.586	10.068	9.939	P	P	3.24514	3.49868	2.86795	3.20392	3.30983	2.7194	3.33172	3.31313	3.16852	-0.366226	-0.233496	-0.563684	-0.314968	-0.561072	-0.305844	-0.31359	0.817166	0.477392	0.536273	-0.2995	-0.374	0.0745
ENSOCUG00000013237	ENSMUSG00000029695	MGI:1353573	Aass	192	115	127	560	570	373	524	3.563	1.873	1.873	9.675	10.515	8.439	10.437	A	P	1.83292	0.905379	0.905352	1.21455	3.2742	3.39443	3.07709	3.38366	3.28235	-1.10553	-1.5911	-1.59111	-0.329817	-0.279702	-0.411979	-0.284193	-4.18112	0.143483	0.20959	-1.3485	-0.3265	-1.022
ENSOCUG00000014434	ENSMUSG00000018697	MGI:1929608	Aatf	442	666	641	864	619	453	698	8.201	10.847	9.453	14.927	11.419	10.249	13.903	P	P	3.03586	3.43927	3.24085	3.23866	3.89981	3.51341	3.35742	3.79732	3.64199	-0.475784	-0.264599	-0.368472	-0.0690517	-0.23011	-0.295129	-0.111771	-1.64853	0.2783	0.347813	-0.3705	-0.1765	-0.194
ENSOCUG00000027943	ENSMUSG00000057191	MGI:3043001	AB124611	492	823	764	504	139	287	217	9.129	13.404	11.268	8.707	2.564	6.493	4.322	P	P	3.19047	3.74464	3.4941	3.4764	3.1222	1.35856	2.69896	2.11179	2.32288	-0.394844	-0.104736	-0.235895	-0.393175	-1.1283	-0.56959	-0.814337	2.21079	0.1064	0.168999	-0.25	-0.72625	0.47625
ENSOCUG00000010579	ENSMUSG00000057880	MGI:2443582	Abat	858	2660	1054	34	42	24	34	15.92	43.324	15.544	0.587	0.775	0.543	0.677	P	A	3.99279	5.4371	3.95833	4.46274	-0.767617	-0.368066	-0.880983	-0.562301	-0.644742	0.0251736	0.781274	0.00713102	-2.01453	-1.84799	-2.06179	-1.92895	6.21207	0.0964855	0.157893	0.403	-1.9635	2.3665
ENSOCUG00000009279	ENSMUSG00000015243	MGI:99607	Abca1	32275	42961	47681	13291	5483	5701	7989	598.865	699.717	703.201	229.616	101.151	128.985	159.127	P	P	9.22609	9.45063	9.45779	9.37817	7.84308	6.66037	7.01105	7.31404	7.20713	2.76482	2.88237	2.88612	1.57459	1.08161	1.22778	1.35407	12.6462	0.000226002	0.00345785	2.8235	1.30975	1.51375
ENSOCUG00000005137	ENSMUSG00000024130	MGI:1351617	Abca3	1849	2786	2271	6147	4272	2399	2689	34.308	45.376	33.493	106.196	78.81	54.277	53.56	P	P	5.10049	5.50387	5.06578	5.22338	6.73059	6.30031	5.76227	5.74309	6.13407	0.605057	0.816228	0.586887	1.11088	0.93153	0.707264	0.699268	-1.04914	0.375884	0.442606	0.7105	0.86225	-0.15175
ENSOCUG00000014338	ENSMUSG00000018800	MGI:2386607	Abca5	754	1352	641	1172	885	1235	1277	13.991	22.02	9.453	20.248	16.327	27.942	25.436	P	P	3.80638	4.46077	3.24085	3.836	4.33968	4.02915	4.80435	4.66878	4.46049	-0.0724144	0.270161	-0.368472	0.114295	-0.0151389	0.307981	0.251472	-0.352752	0.770714	0.805278	0.099	0.1645	-0.0655
ENSOCUG00000014380	ENSMUSG00000044749	MGI:1923434	Abca6	1118	1724	1063	1642	492	3381	2484	20.745	28.079	15.677	28.367	9.076	76.495	49.477	P	P	4.37466	4.81143	3.97059	4.38556	4.82616	3.18213	6.25729	5.62869	4.97357	0.225084	0.453735	0.0135527	0.317071	-0.368195	0.913597	0.651582	-0.130838	0.902568	0.920046	0.3395	0.37875	-0.03925
ENSOCUG00000008011	ENSMUSG00000041828	MGI:2386846	Abca8a	9644	9169	10585	983	677	906	1131	178.945	149.338	156.108	16.982	12.489	20.498	22.528	P	P	7.48337	7.22244	7.2864	7.33074	4.08597	3.64263	4.35742	4.49362	4.14491	1.85251	1.71591	1.74939	0.00854385	-0.176249	0.121692	0.178462	16.8573	0.000220261	0.0034116	1.7845	0.03325	1.75125
ENSOCUG00000007242	ENSMUSG00000031974	MGI:1860508	Abcb10	401	711	454	615	449	256	455	7.441	11.58	6.696	10.625	8.283	5.792	9.063	P	P	2.89542	3.53359	2.74322	3.05741	3.40936	3.05019	2.53405	3.17996	3.04339	-0.549307	-0.215218	-0.628984	-0.27348	-0.423191	-0.638327	-0.3691	0.23777	0.841241	0.867562	-0.382	-0.42575	0.04375
ENSOCUG00000014981	ENSMUSG00000040584	MGI:97570	Abcb1a	764	2100	800	829	734	781	655	14.176	34.203	11.798	14.322	13.541	17.67	13.046	P	P	3.82539	5.09606	3.56052	4.16066	3.84015	3.75925	4.14323	3.70559	3.86206	-0.0624636	0.60274	-0.20112	-0.0939189	-0.127638	0.0324136	-0.150007	1.06127	0.476993	0.535887	0.2705	-0.085	0.3555
ENSOCUG00000015103	ENSMUSG00000026198	MGI:1921354	Abcb6	46	33	44	1343	1326	879	1396	0.854	0.537	0.649	23.202	24.462	19.887	27.806	A	P	-0.22848	-0.895717	-0.623901	-0.5827	4.53616	4.61248	4.31377	4.79732	4.56493	-2.18468	-2.53398	-2.39168	0.196195	0.228006	0.103499	0.305051	-14.3085	0.0334235	0.0753954	-2.3595	0.208	-2.5675
ENSOCUG00000016847	ENSMUSG00000031333	MGI:109533	Abcb7	949	1362	994	1667	1176	1090	1306	17.609	22.183	14.66	28.799	21.695	24.661	26.013	P	P	4.13822	4.4714	3.87377	4.16113	4.84796	4.43929	4.62417	4.70118	4.65315	0.101307	0.275727	-0.037135	0.326158	0.155816	0.232877	0.264976	-0.598616	0.634578	0.683862	0.1885	0.245	-0.0565
ENSOCUG00000008682	ENSMUSG00000028973	MGI:1351667	Abcb8	567	746	715	1566	1546	999	1068	10.521	12.15	10.545	27.054	28.521	22.602	21.273	P	P	3.39516	3.60292	3.39847	3.46552	4.75779	4.83394	4.4984	4.41093	4.62526	-0.287688	-0.178926	-0.285958	0.288573	0.320315	0.180453	0.143996	-6.76771	0.0147341	0.0422394	-0.2335	0.23325	-0.46675
ENSOCUG00000017956	ENSMUSG00000023088	MGI:102676	Abcc1	4113	5024	4861	2429	1904	1284	1650	76.317	81.827	71.69	41.964	35.125	29.05	32.865	P	P	6.25393	6.35451	6.1637	6.25738	5.39107	5.13443	4.86048	5.03849	5.10612	1.20889	1.26154	1.16166	0.552537	0.445567	0.331379	0.405574	15.03	0.000114223	0.00254031	1.2355	0.434	0.8015
ENSOCUG00000004357	ENSMUSG00000032842	MGI:2386976	Abcc10	285	280	392	418	679	403	418	5.288	4.56	5.781	7.221	12.526	9.118	8.326	P	P	2.40278	2.18917	2.53138	2.37444	2.85228	3.64688	3.18869	3.0576	3.18636	-0.807206	-0.919029	-0.739883	-0.505684	-0.174476	-0.36546	-0.420104	-5.52477	0.00692579	0.0248312	-0.863	-0.36625	-0.49675
ENSOCUG00000002754	ENSMUSG00000020865	MGI:1923658	Abcc3	1436	1877	2023	4101	2153	1578	1430	26.645	30.571	29.835	70.849	39.719	35.702	28.483	P	P	4.7358	4.9341	4.89895	4.85628	6.14668	5.31175	5.15794	4.83204	5.3621	0.41414	0.517953	0.49955	0.867493	0.519476	0.455363	0.319521	-0.581805	0.593017	0.645727	0.466	0.54025	-0.07425
ENSOCUG00000014610	ENSMUSG00000032849	MGI:2443111	Abcc4	581	1039	806	1809	951	956	1383	10.78	16.922	11.887	31.252	17.544	21.629	27.547	P	P	3.43035	4.08087	3.5713	3.69417	4.9659	4.13292	4.43492	4.78382	4.57939	-0.269266	0.0712822	-0.195477	0.375317	0.0281137	0.153995	0.299424	-1.67677	0.281697	0.350885	-0.099	0.214	-0.313
ENSOCUG00000007887	ENSMUSG00000022822	MGI:1351644	Abcc5	3535	5916	4716	4051	2725	1987	2510	65.592	96.355	69.552	69.985	50.271	44.956	49.995	P	P	6.03545	6.59029	6.12002	6.24859	6.12898	5.65166	5.49043	5.64371	5.72869	1.09451	1.38498	1.13878	0.860116	0.661157	0.593954	0.657843	3.50357	0.12609	0.190529	1.24	0.69325	0.54675
ENSOCUG00000008023	ENSMUSG00000030249	MGI:1352630	Abcc9	16186	11934	15943	2945	2237	2179	2384	300.332	194.372	235.128	50.878	41.268	49.3	47.485	P	P	8.23042	7.60268	7.8773	7.90347	5.66897	5.36697	5.62351	5.56941	5.55721	2.24359	1.91496	2.05873	0.668374	0.542491	0.649423	0.626872	8.73937	0.064765	0.119199	2.0795	0.6215	1.458
ENSOCUG00000017922	ENSMUSG00000031378	MGI:1349215	Abcd1	899	1207	1211	1580	1361	815	1030	16.681	19.659	17.86	27.296	25.108	18.439	20.516	P	P	4.06014	4.2971	4.15865	4.17196	4.77063	4.65007	4.20471	4.35867	4.49602	0.0604282	0.184479	0.112001	0.293925	0.243673	0.0580388	0.12221	-0.697859	0.542307	0.598075	0.122	0.1795	-0.0575
ENSOCUG00000016168	ENSMUSG00000055782	MGI:1349467	Abcd2	626	607	639	114	138	144	230	11.615	9.886	9.424	1.969	2.546	3.258	4.581	P	A	3.53798	3.30544	3.23634	3.35992	0.97781	1.34814	1.70398	2.19573	1.55641	-0.212924	-0.334657	-0.370832	-1.287	-1.13264	-0.98432	-0.779349	6.20829	0.00343001	0.0152974	-0.274	-1.04575	0.77175
ENSOCUG00000004820	ENSMUSG00000028127	MGI:1349216	Abcd3	1849	2472	2187	2545	2228	2510	2987	34.308	40.262	32.254	43.968	41.102	56.788	59.496	P	P	5.10049	5.33135	5.0114	5.14775	5.45837	5.36115	5.82753	5.89472	5.63544	0.605057	0.725915	0.558422	0.580591	0.540067	0.734463	0.76247	0.137516	0.900158	0.918284	0.6655	0.65425	0.01125
ENSOCUG00000003484	ENSMUSG00000021240	MGI:1349217	Abcd4	461	545	674	669	691	497	370	8.554	8.877	9.94	11.558	12.748	11.245	7.37	P	P	3.09658	3.15	3.31327	3.18662	3.53078	3.67216	3.49116	2.88162	3.39393	-0.443996	-0.416031	-0.330558	-0.222869	-0.163941	-0.239386	-0.493455	-2.02433	0.130024	0.195279	-0.43	-0.27975	-0.15025
ENSOCUG00000001821	ENSMUSG00000058355	MGI:1195458	Abce1	2243	3428	2354	5550	4604	4868	6617	41.619	55.833	34.717	95.882	84.935	110.138	131.799	P	P	5.37917	5.80304	5.11757	5.43326	6.58319	6.40829	6.78317	7.0422	6.70421	0.750949	0.972846	0.613998	1.04944	0.976537	1.13279	1.24076	-1.90883	0.231319	0.300888	0.862	1.1	-0.238
ENSOCUG00000002121	ENSMUSG00000038762	MGI:1351658	Abcf1	1414	2121	2068	2843	2538	1718	1783	26.237	34.545	30.499	49.116	46.821	38.87	35.514	P	P	4.71352	5.11042	4.93069	4.91821	5.61812	5.54909	5.28057	5.15033	5.39953	0.40248	0.610255	0.516166	0.647177	0.618406	0.506479	0.452192	-0.437413	0.71933	0.759875	0.506	0.55575	-0.04975
ENSOCUG00000000245	ENSMUSG00000028953	MGI:1351657	Abcf2	1049	1689	1316	2680	2068	1633	2129	19.464	27.509	19.408	46.3	38.151	36.946	42.406	P	P	4.28276	4.78184	4.27861	4.44774	5.53294	5.25364	5.20736	5.4062	5.35003	0.176971	0.438245	0.174801	0.611672	0.495253	0.475966	0.558844	-1.69962	0.318949	0.387124	0.3075	0.5355	-0.228
ENSOCUG00000004565	ENSMUSG00000003234	MGI:1351656	Abcf3	1191	1465	1318	2022	1860	1344	1354	22.099	23.861	19.438	34.932	34.313	30.408	26.969	P	P	4.46592	4.57657	4.2808	4.4411	5.12649	5.1007	4.92637	4.75325	4.9767	0.272856	0.330786	0.175948	0.442255	0.431507	0.358843	0.286681	-1.68448	0.175029	0.243354	0.302	0.38	-0.078
ENSOCUG00000011389	ENSMUSG00000029802	MGI:1347061	Abcg2	586	839	579	1291	851	1062	1297	10.873	13.665	8.539	22.303	15.699	24.028	25.834	P	P	3.44271	3.77242	3.09409	3.43641	4.47919	3.97263	4.58662	4.6912	4.43241	-0.262794	-0.0901942	-0.445302	0.172449	-0.038697	0.217228	0.260817	-3.01853	0.0810501	0.139511	-0.1765	0.15275	-0.32925
ENSOCUG00000016931	ENSMUSG00000032131	MGI:1890594	Abcg4	187	558	244	270	447	172	245	3.47	9.088	3.599	4.665	8.246	3.891	4.88	P	P	1.79485	3.18401	1.8474	2.27542	2.22174	3.04375	1.96032	2.28687	2.37817	-1.12546	-0.398227	-1.09794	-0.768508	-0.425876	-0.877472	-0.741357	-0.154834	0.899676	0.917889	-0.7615	-0.70325	-0.05825
ENSOCUG00000003969	ENSMUSG00000033157	MGI:2442422	Abhd10	257	470	265	378	322	374	356	4.769	7.655	3.908	6.53	5.94	8.462	7.091	P	P	2.25358	2.93641	1.96652	2.3855	2.70716	2.57053	3.08095	2.82597	2.79615	-0.885309	-0.527849	-1.03559	-0.566172	-0.623122	-0.410369	-0.51665	-0.96398	0.496314	0.555093	-0.7065	-0.529	-0.1775
ENSOCUG00000011326	ENSMUSG00000040532	MGI:1916008	Abhd11	221	344	332	648	653	454	412	4.101	5.603	4.896	11.195	12.047	10.272	8.206	A	P	2.03586	2.48615	2.29171	2.27124	3.48477	3.59056	3.3606	3.03674	3.36817	-0.999288	-0.763558	-0.865351	-0.242048	-0.197954	-0.293803	-0.428798	-4.62501	0.0837409	0.142678	-0.8815	-0.29075	-0.59075
ENSOCUG00000002798	ENSMUSG00000032046	MGI:1923442	Abhd12	2379	3660	3193	14231	8564	5389	11990	44.143	59.611	47.091	245.856	157.99	121.926	238.82	P	P	5.4641	5.89752	5.55736	5.63966	7.94167	7.30369	6.92986	7.89978	7.51875	0.795408	1.0223	0.844234	1.61568	1.34976	1.19394	1.59822	-3.48155	0.0476209	0.0959023	0.9085	1.4395	-0.531
ENSOCUG00000015739	ENSMUSG00000040396	MGI:1916154	Abhd13	1150	1546	1211	758	473	557	822	21.338	25.18	17.86	13.095	8.726	12.602	16.373	P	P	4.41538	4.65421	4.15865	4.40941	3.71097	3.12531	3.65559	4.03323	3.63128	0.246398	0.37143	0.112001	-0.147761	-0.391878	-0.170847	-0.0134378	4.87858	0.010411	0.0329581	0.3085	-0.181	0.4895
ENSOCUG00000010023	ENSMUSG00000042073	MGI:1923741	Abhd14b	281	240	312	1093	1283	929	633	5.214	3.909	4.601	18.883	23.669	21.019	12.608	A	P	2.38238	1.96678	2.20207	2.18374	4.239	4.56492	4.39359	3.6563	4.21345	-0.817881	-1.03545	-0.912277	0.0723301	0.208182	0.136767	-0.170552	-7.25419	0.0135227	0.0399559	-0.9265	0.0615	-0.988
ENSOCUG00000023272	ENSMUSG00000007036	MGI:99476	Abhd16a	1206	1648	1392	2404	2250	1508	1614	22.377	26.841	20.529	41.532	41.508	34.118	32.148	P	P	4.48397	4.74639	4.35961	4.52999	5.37614	5.37533	5.09248	5.00666	5.21265	0.282308	0.419685	0.217205	0.546316	0.545976	0.428078	0.392309	-1.59294	0.271668	0.34138	0.351	0.478	-0.127
ENSOCUG00000000819	ENSMUSG00000047368	MGI:1917816	Abhd17b	578	863	613	346	223	291	338	10.725	14.056	9.041	5.978	4.114	6.584	6.732	P	P	3.42288	3.81311	3.17641	3.4708	2.57955	2.04052	2.71893	2.75112	2.52253	-0.273176	-0.0688929	-0.402205	-0.619364	-0.844044	-0.561267	-0.547851	3.83712	0.0627394	0.116463	-0.171	-0.643	0.472
ENSOCUG00000013527	ENSMUSG00000039202	MGI:1914344	Abhd2	4336	6760	5221	969	554	369	519	80.455	110.102	77	16.741	10.22	8.349	10.338	P	P	6.33011	6.7827	6.26678	6.45986	4.06527	3.35336	3.06153	3.36983	3.4625	1.24877	1.4857	1.21561	-8.21626e-05	-0.296823	-0.418463	-0.289959	10.9336	0.00580291	0.0220302	1.3675	-0.25125	1.61875
ENSOCUG00000014277	ENSMUSG00000040997	MGI:1915938	Abhd4	1235	1609	1412	7380	3852	2831	3805	22.916	26.206	20.824	127.497	71.062	64.051	75.789	P	P	4.51825	4.71184	4.38019	4.53676	6.99433	6.15101	6.00115	6.24392	6.3476	0.300255	0.401597	0.227979	1.22081	0.869297	0.806833	0.908023	-5.69261	0.00472349	0.0191359	0.351	0.95125	-0.60025
ENSOCUG00000006495	ENSMUSG00000032540	MGI:1914719	Abhd5	864	1102	1004	2620	1234	1233	1890	16.032	17.949	14.807	45.263	22.765	27.896	37.646	P	P	4.00285	4.1658	3.88821	4.01895	5.50027	4.50874	4.80201	5.23441	5.01136	0.0304367	0.115743	-0.0295748	0.598056	0.184766	0.307007	0.487238	-3.16406	0.0353187	0.0782562	0.073	0.39425	-0.32125
ENSOCUG00000000832	ENSMUSG00000025277	MGI:1913332	Abhd6	193	265	212	454	193	197	285	3.581	4.316	3.127	7.843	3.56	4.457	5.677	A	P	1.84041	2.10974	1.64459	1.86491	2.97147	1.83207	2.15611	2.50505	2.36618	-1.1016	-0.960613	-1.20412	-0.456003	-0.930927	-0.795863	-0.650415	-2.61059	0.0611392	0.114478	-1.0315	-0.70825	-0.32325
ENSOCUG00000010076	ENSMUSG00000058835	MGI:104913	Abi1	2874	3665	3097	3640	2117	1953	3623	53.327	59.693	45.675	62.885	39.055	44.186	72.164	P	P	5.7368	5.89949	5.51332	5.71654	5.97464	5.28742	5.46553	6.17321	5.7252	0.93817	1.02334	0.821178	0.795784	0.509336	0.583576	0.878549	2.97812	0.0417257	0.0878687	0.9805	0.692	0.2885
ENSOCUG00000016339	ENSMUSG00000018381	MGI:1913860	Abi3	175	235	279	1789	1151	1083	599	3.247	3.828	4.115	30.907	21.234	24.503	11.931	A	P	1.69917	1.93641	2.04079	1.89212	4.94986	4.40829	4.61487	3.57665	4.38742	-1.17555	-1.05135	-0.996708	0.368632	0.142894	0.229003	-0.203751	-9.10318	0.000843781	0.00662213	-1.1135	0.13425	-1.24775
ENSOCUG00000005336	ENSMUSG00000035258	MGI:2444583	Abi3bp	5364	3615	4577	3107	4221	3806	5439	99.529	58.878	67.502	53.677	77.869	86.11	108.335	P	P	6.63705	5.87967	6.07685	6.19786	5.74623	6.28299	6.42811	6.75936	6.30417	1.40945	1.01296	1.11619	0.700575	0.924308	0.984801	1.12287	1.28212	0.370594	0.43795	1.211	0.93325	0.27775
ENSOCUG00000008738	ENSMUSG00000026596	MGI:87860	Abl2	2366	3960	3296	210	82	76	93	43.901	64.498	48.61	3.628	1.513	1.719	1.852	P	A	5.45619	6.01117	5.60317	5.69018	1.85917	0.597168	0.781982	0.889395	1.03193	0.79127	1.0818	0.868212	-0.919635	-1.44566	-1.36863	-1.32386	11.7644	0.00356634	0.0156755	0.9365	-1.26475	2.20125
ENSOCUG00000015864	ENSMUSG00000025085	MGI:1194500	Ablim1	4517	5053	5110	4046	4291	3518	4207	83.813	82.3	75.363	69.899	79.161	79.594	83.796	P	P	6.38911	6.36281	6.23578	6.32923	6.1272	6.30671	6.31459	6.38881	6.28433	1.27965	1.26589	1.19938	0.859373	0.934199	0.937483	0.968419	14.4118	0.000312921	0.00410213	1.273	0.9245	0.3485
ENSOCUG00000005197	ENSMUSG00000017631	MGI:107771	Abr	3171	5873	4357	8183	4238	2820	4298	58.838	95.655	64.257	141.37	78.183	63.802	85.609	P	P	5.87868	6.57977	6.00579	6.15475	7.14333	6.28878	5.99553	6.41969	6.46183	1.01244	1.37947	1.07898	1.28292	0.926725	0.804492	0.981288	0.937742	0.464389	0.524696	1.1955	0.99875	0.19675
ENSOCUG00000004884	ENSMUSG00000078453	MGI:1920362	Abracl	448	521	526	1664	1013	1141	1000	8.313	8.486	7.757	28.747	18.688	25.815	19.918	P	P	3.05531	3.08503	2.95559	3.03198	4.84536	4.22403	4.69014	4.31602	4.51889	-0.4656	-0.450044	-0.517807	0.325075	0.0660932	0.260375	0.104435	-10.372	0.00165837	0.00965926	-0.458	0.18875	-0.64675
ENSOCUG00000013327	ENSMUSG00000035234	MGI:1917931	Abraxas1	175	232	206	517	381	386	631	3.247	3.779	3.038	8.932	7.029	8.733	12.568	A	P	1.69917	1.91787	1.60317	1.74007	3.15894	2.81326	3.12651	3.65173	3.18761	-1.17555	-1.06106	-1.2258	-0.377861	-0.521946	-0.391378	-0.172455	-8.14813	0.00184059	0.0102438	-1.1185	-0.36575	-0.75275
ENSOCUG00000004780	ENSMUSG00000030965	MGI:1926116	Abraxas2	840	1140	939	471	318	265	459	15.586	18.567	13.848	8.137	5.866	5.996	9.142	P	P	3.9622	4.21471	3.79165	3.98952	3.0245	2.5525	2.5839	3.19259	2.83837	0.00916047	0.141347	-0.0801255	-0.433897	-0.630639	-0.617549	-0.363836	6.2531	0.00799985	0.0273225	0.075	-0.51175	0.58675
ENSOCUG00000016429	ENSMUSG00000036376	MGI:1353636	Abt1	232	331	253	472	390	345	251	4.305	5.391	3.731	8.154	7.195	7.806	4.999	A	P	2.10594	2.43058	1.89966	2.14539	3.02756	2.84695	2.96451	2.32178	2.7902	-0.962601	-0.792653	-1.07059	-0.432622	-0.507907	-0.458905	-0.726807	-3.20073	0.0698774	0.125498	-0.878	-0.53175	-0.34625
ENSOCUG00000027274	ENSMUSG00000030083	MGI:1933148	Abtb1	503	706	566	1329	1394	1042	713	9.333	11.499	8.347	22.96	25.717	23.575	14.202	P	P	3.22237	3.52341	3.06133	3.26904	4.52105	4.68463	4.55919	3.82799	4.39822	-0.378144	-0.220548	-0.462453	0.189894	0.25808	0.205795	-0.0989847	-3.89598	0.0286427	0.0675489	-0.2995	0.13875	-0.43825
ENSOCUG00000001405	ENSMUSG00000032724	MGI:2139365	Abtb2	1016	1158	1068	525	667	284	421	18.852	18.861	15.751	9.07	12.305	6.425	8.386	P	P	4.23664	4.23731	3.97736	4.15044	3.18109	3.62116	2.6838	3.06791	3.13849	0.15283	0.153179	0.0170969	-0.368627	-0.185198	-0.575909	-0.415803	6.70505	0.00676919	0.0244138	0.153	-0.3865	0.5395
ENSOCUG00000002410	ENSMUSG00000036138	MGI:2148491	Acaa1a	1554	1700	1836	1120	1457	1039	701	28.835	27.688	27.077	19.349	26.879	23.507	13.963	P	P	4.84973	4.79121	4.75902	4.79998	4.2742	4.7484	4.55503	3.80351	4.34529	0.473783	0.443148	0.426296	0.0870044	0.28466	0.204061	-0.109192	3.93198	0.0261709	0.0634982	0.4585	0.11675	0.34175
ENSOCUG00000016540	ENSMUSG00000036880	MGI:1098623	Acaa2	2332	1341	2299	4546	3460	2407	2853	43.27	21.841	33.906	78.537	63.83	54.458	56.827	P	P	5.43531	4.44898	5.08346	4.98925	6.2953	5.99617	5.76708	5.8285	5.97176	0.780338	0.263991	0.596142	0.929442	0.804758	0.709266	0.734869	-1.0375	0.478737	0.537536	0.522	0.7945	-0.2725
ENSOCUG00000014453	ENSMUSG00000020532	MGI:108451	Acaca	8186	7208	9387	2008	1321	957	1541	151.892	117.399	138.44	34.69	24.37	21.652	30.694	P	P	7.2469	6.87527	7.11312	7.07843	5.11646	4.60703	4.43643	4.93989	4.77495	1.72871	1.53416	1.65868	0.438077	0.225734	0.154624	0.364476	11.4384	0.00848216	0.0284503	1.6315	0.29575	1.33575
ENSOCUG00000007432	ENSMUSG00000042010	MGI:2140940	Acacb	2603	1542	3704	643	1105	486	454	48.299	25.115	54.627	11.109	20.385	10.996	9.043	P	P	5.59392	4.65048	5.77154	5.33864	3.47359	4.34945	3.45887	3.17678	3.61467	0.863369	0.369474	0.956353	-0.246706	0.118368	-0.252845	-0.370423	2.99188	0.146373	0.212503	0.616	-0.188	0.804
ENSOCUG00000011359	ENSMUSG00000029456	MGI:1919235	Acad10	234	247	293	869	559	542	451	4.342	4.023	4.321	15.013	10.312	12.263	8.983	A	P	2.11832	2.00826	2.11142	2.07933	3.90813	3.36632	3.6162	3.16722	3.51447	-0.956118	-1.01374	-0.95973	-0.0655817	-0.29142	-0.187264	-0.37441	-10.4027	0.000599912	0.00570416	-0.985	-0.2295	-0.7555
ENSOCUG00000022723	ENSMUSG00000090150	MGI:2143169	Acad11	875	763	987	575	396	354	445	16.236	12.427	14.556	9.934	7.305	8.009	8.864	P	P	4.0211	3.63543	3.86357	3.84003	3.31234	2.86897	3.00166	3.1479	3.08272	0.0399916	-0.161908	-0.0424725	-0.313921	-0.498726	-0.443419	-0.382464	3.21023	0.141214	0.207178	-0.061	-0.4095	0.3485
ENSOCUG00000012305	ENSMUSG00000031969	MGI:1914198	Acad8	657	963	838	448	447	306	303	12.191	15.685	12.359	7.74	8.246	6.923	6.035	P	P	3.60771	3.97128	3.62747	3.73549	2.95227	3.04375	2.79144	2.59341	2.84522	-0.17642	0.0139124	-0.166072	-0.464004	-0.425876	-0.531042	-0.613586	4.13003	0.0956482	0.157078	-0.081	-0.50875	0.42775
ENSOCUG00000011635	ENSMUSG00000027710	MGI:1914272	Acad9	675	857	737	775	336	309	544	12.525	13.958	10.869	13.389	6.199	6.991	10.836	P	P	3.6467	3.80304	3.44219	3.63064	3.74297	2.63193	2.80552	3.4377	3.15453	-0.156006	-0.0741622	-0.263069	-0.134424	-0.597529	-0.525175	-0.261668	2.27049	0.0913596	0.15251	-0.115	-0.37975	0.26475
ENSOCUG00000006625	ENSMUSG00000026003	MGI:87866	Acadl	2369	1923	2484	5542	4836	4194	4936	43.957	31.32	36.634	95.744	89.215	94.889	98.317	P	P	5.45802	4.96903	5.19512	5.20739	6.58111	6.47921	6.56817	6.61936	6.56196	0.792227	0.536239	0.654596	1.04857	1.0061	1.04318	1.06452	-2.92947	0.205643	0.274803	0.664	1.04075	-0.37675
ENSOCUG00000013662	ENSMUSG00000062908	MGI:87867	Acadm	2688	2088	2438	1547	1642	1225	1833	49.876	34.008	35.956	26.726	30.292	27.715	36.51	P	P	5.64028	5.08779	5.16815	5.29874	4.74018	4.92085	4.79262	5.19023	4.91097	0.887638	0.598412	0.640478	0.281233	0.356543	0.303092	0.468823	2.58683	0.204298	0.273467	0.743	0.3525	0.3905
ENSOCUG00000008379	ENSMUSG00000029545	MGI:87868	Acads	685	665	972	1444	1229	836	669	12.71	10.831	14.335	24.947	22.673	18.914	13.325	P	P	3.66792	3.4371	3.84148	3.64883	4.64077	4.50289	4.24141	3.7361	4.28029	-0.144899	-0.265734	-0.0540387	0.239799	0.182324	0.0733373	-0.137289	-2.8709	0.048129	0.0966455	-0.2055	0.0895	-0.295
ENSOCUG00000005330	ENSMUSG00000030861	MGI:1914135	Acadsb	2872	2992	2559	2081	1506	1179	1514	53.29	48.732	37.74	35.952	27.783	26.675	30.156	P	P	5.7358	5.60678	5.23803	5.52687	5.16798	4.79612	4.7374	4.91439	4.90397	0.937644	0.870105	0.677062	0.45955	0.304552	0.280076	0.353846	10.5831	0.000936564	0.00701306	0.904	0.34975	0.55425
ENSOCUG00000006966	ENSMUSG00000018574	MGI:895149	Acadvl	1928	1609	2058	3015	3425	2161	1896	35.774	26.206	30.351	52.087	63.185	48.892	37.765	P	P	5.16085	4.71184	4.92369	4.93213	5.70286	5.9815	5.61154	5.23898	5.63372	0.636655	0.401597	0.512505	0.6825	0.798644	0.644434	0.489144	-1.00328	0.440918	0.503322	0.5195	0.65375	-0.13425
ENSOCUG00000022093	ENSMUSG00000030607	MGI:99602	Acan	2599	2462	2160	554	1198	746	700	48.225	40.099	31.856	9.571	22.101	16.878	13.943	P	P	5.5917	5.3255	4.99348	5.30356	3.25866	4.46603	4.07709	3.80145	3.90081	0.862208	0.722854	0.54904	-0.336295	0.166961	0.00484216	-0.11005	6.80496	0.00256464	0.0127407	0.7925	-0.0685	0.861
ENSOCUG00000015300	ENSMUSG00000001588	MGI:2388270	Acap1	98	193	160	605	505	355	274	1.818	3.143	2.36	10.452	9.316	8.032	5.458	A	P	0.862668	1.65235	1.2386	1.2512	3.38571	3.21976	3.00573	2.44827	3.01487	-1.61346	-1.20006	-1.41666	-0.283338	-0.352512	-0.441722	-0.674084	-4.33608	0.0938027	0.155134	-1.4065	-0.438	-0.9685
ENSOCUG00000001798	ENSMUSG00000049076	MGI:1925868	Acap2	3157	3890	3756	5174	3805	4598	4723	58.578	63.357	55.394	89.386	70.195	104.029	94.074	P	P	5.8723	5.98544	5.79165	5.88313	6.48198	6.1333	6.70085	6.55572	6.46796	1.0091	1.06833	0.966883	1.00725	0.861915	1.09848	1.03799	0.640579	0.55666	0.611962	1.0385	1.00125	0.03725
ENSOCUG00000002882	ENSMUSG00000032047	MGI:87870	Acat1	1990	2108	2011	4261	3076	2352	3399	36.925	34.334	29.658	73.613	56.746	53.214	67.702	P	P	5.20651	5.10155	4.89036	5.06614	6.2019	5.82646	5.73373	6.08113	5.9608	0.66056	0.605612	0.495057	0.890508	0.734017	0.695365	0.840171	-2.94285	0.0423535	0.0888942	0.6335	0.79	-0.1565
ENSOCUG00000013836	ENSMUSG00000062480	MGI:109182	Acat3	69	66	78	2412	1871	1601	1918	1.28	1.075	1.15	41.67	34.516	36.222	38.203	A	P	0.356482	0.104283	0.20207	0.220945	5.38093	5.10921	5.17881	5.25562	5.23115	-1.87845	-2.01048	-1.95928	0.548314	0.435053	0.464065	0.496081	-34.5639	0.00740024	0.0259395	-1.944	0.48575	-2.42975
ENSOCUG00000014391	ENSMUSG00000026499	MGI:2181074	Acbd3	1966	2506	2097	1374	1014	743	1235	36.479	40.816	30.927	23.737	18.706	16.81	24.599	P	P	5.18901	5.35106	4.95078	5.16361	4.56909	4.22546	4.07127	4.62053	4.37159	0.651396	0.736232	0.526684	0.209918	0.0666866	0.00241901	0.231362	8.09922	0.00171798	0.00984063	0.6935	0.1275	0.566
ENSOCUG00000006742	ENSMUSG00000056938	MGI:1914381	Acbd4	874	866	1062	569	712	574	364	16.217	14.105	15.662	9.83	13.135	12.987	7.25	P	P	4.01945	3.81811	3.96924	3.9356	3.2972	3.71535	3.69896	2.85803	3.39239	0.0391279	-0.066272	0.0128419	-0.320229	-0.145938	-0.152768	-0.503286	2.68698	0.0550925	0.106263	-0.0135	-0.2805	0.267
ENSOCUG00000016879	ENSMUSG00000026781	MGI:1921409	Acbd5	2036	2670	2220	726	560	393	648	37.778	43.487	32.741	12.542	10.331	8.892	12.907	P	P	5.23948	5.44251	5.03301	5.23833	3.64875	3.3689	3.15244	3.69009	3.46504	0.67782	0.784108	0.569733	-0.1737	-0.290346	-0.38057	-0.156468	13.1242	0.000979948	0.00719393	0.731	-0.25025	0.98125
ENSOCUG00000005184	ENSMUSG00000033701	MGI:1919732	Acbd6	419	633	518	703	613	502	371	7.775	10.31	7.639	12.145	11.309	11.358	7.39	P	P	2.95876	3.36595	2.93348	3.08606	3.6023	3.49936	3.5056	2.88551	3.37319	-0.516144	-0.30298	-0.529383	-0.193059	-0.235967	-0.233366	-0.491832	-0.955405	0.445103	0.507029	-0.4095	-0.2885	-0.121
ENSOCUG00000007357	ENSMUSG00000040272	MGI:1919717	Accs	315	440	437	80	29	61	48	5.845	7.166	6.445	1.382	0.535	1.38	0.956	P	A	2.54717	2.84125	2.68816	2.69219	0.466848	-0.902403	0.464792	-0.064801	-0.00889084	-0.731617	-0.577664	-0.657808	-1.49998	-2.07072	-1.50084	-1.72159	6.72567	0.00254613	0.012687	-0.655	-1.6985	1.0435
ENSOCUG00000009011	ENSMUSG00000038000	MGI:87873	Acd	247	317	328	687	804	497	610	4.583	5.163	4.837	11.869	14.832	11.245	12.15	A	P	2.19632	2.36823	2.27422	2.27959	3.56909	3.89067	3.49116	3.6029	3.63845	-0.915284	-0.825292	-0.874506	-0.206903	-0.0728612	-0.239386	-0.192808	-11.969	0.00346004	0.0153609	-0.87	-0.178	-0.692
ENSOCUG00000001555	ENSMUSG00000020681	MGI:87874	Ace	11191	9965	13474	1976	1012	1534	1227	207.65	162.303	198.715	34.138	18.669	34.707	24.44	P	P	7.69801	7.34254	7.63456	7.55837	5.09329	4.22261	5.11714	4.61116	4.76105	1.96487	1.77878	1.93165	0.428416	0.0654993	0.438358	0.227454	12.2786	0.00142354	0.00879163	1.872	0.2895	1.5825
ENSOCUG00000012439	ENSMUSG00000038007	MGI:1920932	Acer2	335	333	484	191	182	105	117	6.216	5.424	7.138	3.3	3.358	2.376	2.33	P	A	2.63598	2.43927	2.83553	2.63692	1.72235	1.74741	1.2483	1.2206	1.48467	-0.685125	-0.788103	-0.580657	-0.976663	-0.966217	-1.17426	-1.1858	4.27891	0.0175456	0.0480209	-0.7365	-1.07575	0.33925
ENSOCUG00000021559	ENSMUSG00000030760	MGI:1913440	Acer3	1473	2272	1826	98	57	44	75	27.332	37.005	26.93	1.693	1.052	0.995	1.494	P	A	4.7725	5.20964	4.75114	4.91109	0.75963	0.0725063	-0.0065134	0.579055	0.351169	0.433354	0.662196	0.422171	-1.37794	-1.66435	-1.69729	-1.45321	15.1064	0.00428401	0.0179151	0.5475	-1.548	2.0955
ENSOCUG00000001678	ENSMUSG00000022185	MGI:1891824	Acin1	3036	4031	4229	4513	3770	2693	3060	56.333	65.654	62.369	77.967	69.549	60.929	60.95	P	P	5.81591	6.03681	5.96277	5.9385	6.28479	6.11997	5.92905	5.92955	6.06584	0.979585	1.09523	1.05646	0.925061	0.856358	0.776782	0.776989	3.01129	0.105703	0.168194	1.0375	0.83375	0.20375
ENSOCUG00000024046	ENSMUSG00000037872	MGI:1097689	Ackr1	60	296	158	250	227	558	255	1.113	4.821	2.33	4.319	4.188	12.625	5.079	A	P	0.154848	2.26934	1.22045	1.21488	2.1107	2.06616	3.65818	2.34459	2.54491	-1.98401	-0.877059	-1.42616	-0.814788	-0.833353	-0.169769	-0.7173	-1.38506	0.373554	0.440538	-1.4305	-0.63375	-0.79675
ENSOCUG00000010906	ENSMUSG00000044337	MGI:109562	Ackr3	2463	1660	2039	1207	2000	1808	1830	45.701	27.037	30.071	20.852	36.896	40.906	36.45	P	P	5.51416	4.75686	4.91031	5.06044	4.38213	5.2054	5.35423	5.18786	5.03241	0.821615	0.425164	0.5055	0.131991	0.475148	0.537184	0.467838	1.00851	0.45182	0.512998	0.6235	0.403	0.2205
ENSOCUG00000013212	ENSMUSG00000020917	MGI:103251	Acly	7538	13299	8547	6124	4253	3823	4332	139.868	216.604	126.052	105.799	78.46	86.495	86.286	P	P	7.12792	7.75892	6.97787	7.28824	6.72518	6.29388	6.43454	6.43105	6.47116	1.66643	1.99676	1.58787	1.10862	0.92885	0.987481	0.986026	4.88106	0.110923	0.173912	1.8315	1.00275	0.82875
ENSOCUG00000015960	ENSMUSG00000028405	MGI:87879	Aco1	1882	1946	2131	8039	5353	5327	6389	34.921	31.695	31.428	138.882	98.753	120.523	127.258	P	P	5.12601	4.98618	4.97398	5.02873	7.11772	6.62575	6.91316	6.99161	6.91206	0.618417	0.545219	0.538831	1.27224	1.06718	1.18698	1.21968	-10.6535	0.000859928	0.00666129	0.5815	1.1865	-0.605
ENSOCUG00000021368	ENSMUSG00000022477	MGI:87880	Aco2	6732	5322	7333	8243	7070	4694	5966	124.913	86.681	108.147	142.407	130.428	106.201	118.832	P	P	6.96478	6.43764	6.75686	6.71976	7.15387	7.02711	6.73066	6.89278	6.95111	1.58102	1.30506	1.47217	1.28731	1.23448	1.11091	1.17849	1.68098	0.316343	0.384777	1.443	1.2025	0.2405
ENSOCUG00000008092	ENSMUSG00000034853	MGI:1913736	Acot11	1513	1664	1957	344	396	123	164	28.074	27.102	28.862	5.943	7.305	2.783	3.267	P	A	4.81115	4.76033	4.8511	4.80753	2.57118	2.86897	1.47657	1.70779	2.15613	0.45359	0.426982	0.474499	-0.62285	-0.498726	-1.07911	-0.982732	8.82871	0.00284915	0.0135645	0.4405	-0.796	1.2365
ENSOCUG00000013786	ENSMUSG00000006717	MGI:1914084	Acot13	329	414	307	323	290	296	290	6.105	6.743	4.528	5.58	5.35	6.697	5.776	P	P	2.6099	2.75338	2.17876	2.51401	2.48031	2.41953	2.74351	2.53015	2.54337	-0.698775	-0.623666	-0.924478	-0.660728	-0.686065	-0.551022	-0.639956	-0.56678	0.621067	0.671832	-0.6615	-0.6345	-0.027
ENSOCUG00000012605	ENSMUSG00000028937	MGI:1917275	Acot7	399	2769	589	1242	1552	1042	1012	7.403	45.099	8.687	21.457	28.631	23.575	20.157	P	P	2.8882	5.49504	3.11879	3.83401	4.42337	4.83953	4.55919	4.33323	4.53883	-0.553083	0.811606	-0.432369	0.14918	0.322644	0.205795	0.111608	-0.0994073	0.936811	0.948513	0.1295	0.1975	-0.068
ENSOCUG00000012187	ENSMUSG00000017307	MGI:2158201	Acot8	152	229	203	702	726	501	409	2.82	3.73	2.994	12.128	13.393	11.335	8.147	A	P	1.49589	1.89909	1.582	1.65899	3.60025	3.74344	3.50272	3.02619	3.46815	-1.28197	-1.07089	-1.23688	-0.193915	-0.134228	-0.234565	-0.433193	-7.49299	0.0227337	0.0574663	-1.1765	-0.249	-0.9275
ENSOCUG00000004779	ENSMUSG00000025287	MGI:1928939	Acot9	1147	1523	1234	714	548	565	756	21.283	24.806	18.199	12.335	10.11	12.783	15.058	P	P	4.41161	4.63259	4.18579	4.41	3.6247	3.33765	3.67616	3.91248	3.63775	0.244425	0.36011	0.126211	-0.183722	-0.303372	-0.162272	-0.0637699	6.3205	0.0132769	0.0393973	0.302	-0.17825	0.48025
ENSOCUG00000012924	ENSMUSG00000020777	MGI:1330812	Acox1	3440	3993	4053	2332	1312	974	1698	63.829	65.035	59.774	40.288	24.204	22.037	33.821	P	P	5.99615	6.02315	5.90144	5.97358	5.33227	4.59717	4.46183	5.07986	4.86778	1.07394	1.08807	1.02436	0.52803	0.221623	0.165213	0.422818	8.75468	0.00297907	0.0139852	1.081	0.3345	0.7465
ENSOCUG00000027541	ENSMUSG00000029098	MGI:1933156	Acox3	1655	2203	2177	271	415	294	122	30.709	35.881	32.106	4.682	7.656	6.652	2.43	P	P	4.94057	5.16514	5.00479	5.03684	2.22707	2.93658	2.73373	1.28097	2.29459	0.521341	0.638904	0.55496	-0.766285	-0.470544	-0.555099	-1.16064	7.99475	0.00181746	0.0101717	0.58	-0.73825	1.31825
ENSOCUG00000012876	ENSMUSG00000044573	MGI:87881	Acp1	764	1242	815	1545	1318	1290	1497	14.176	20.229	12.02	26.692	24.315	29.186	29.818	P	P	3.82539	4.33834	3.58732	3.91702	4.73831	4.60375	4.86721	4.89809	4.77684	-0.0624636	0.206069	-0.18709	0.280455	0.224367	0.334183	0.347056	-1.63785	0.333745	0.401626	0.072	0.29625	-0.22425
ENSOCUG00000013342	ENSMUSG00000002103	MGI:87882	Acp2	1794	2712	2566	4071	2793	2251	2517	33.288	44.171	37.843	70.331	51.526	50.929	50.134	P	P	5.05692	5.46503	5.24197	5.25464	6.13609	5.68722	5.67041	5.64773	5.78536	0.58225	0.795896	0.679125	0.863078	0.675979	0.668971	0.659518	-0.238109	0.84125	0.867562	0.689	0.717	-0.028
ENSOCUG00000000444	ENSMUSG00000028093	MGI:1931010	Acp6	361	389	423	461	399	286	382	6.698	6.336	6.238	7.964	7.361	6.471	7.609	P	P	2.74381	2.66351	2.64118	2.68284	2.99354	2.87986	2.69393	2.92767	2.87375	-0.628672	-0.670708	-0.6824	-0.446802	-0.494187	-0.571689	-0.474261	-4.49397	0.0132003	0.0392802	-0.65	-0.49675	-0.15325
ENSOCUG00000024977	ENSMUSG00000032281	MGI:2385656	Acsbg1	141	713	129	1	0	2	0	2.616	11.613	1.902	0.017	0	0.045	0	P	A	1.38751	3.53765	0.927895	1.95102	-5.85508	-5.76038	-4.46595	-5.64976	-5.43279	-1.3387	-0.213097	-1.57931	-4.1351	-4.09563	-3.55608	-4.04952	5.49704	0.0959997	0.157484	-0.776	-3.95925	3.18325
ENSOCUG00000002690	ENSMUSG00000076435	MGI:2388287	Acsf2	401	475	659	4247	3831	2873	2712	7.441	7.736	9.719	73.372	70.675	65.001	54.018	P	P	2.89542	2.95167	3.2808	3.04263	6.19715	6.14312	6.0224	5.75538	6.02951	-0.549307	-0.519857	-0.347556	0.888529	0.86601	0.815689	0.70439	-31.001	1.58397e-05	0.00113881	-0.5345	0.81875	-1.35325
ENSOCUG00000029431	ENSMUSG00000015016	MGI:2182591	Acsf3	322	399	423	112	65	22	54	5.975	6.499	6.238	1.935	1.199	0.498	1.076	P	A	2.57887	2.70013	2.64118	2.64006	0.952275	0.261984	-1.00651	0.105124	0.0782174	-0.715018	-0.651538	-0.6824	-1.29765	-1.58537	-2.11411	-1.65076	5.69097	0.00900345	0.0298184	-0.6835	-1.662	0.9785
ENSOCUG00000014970	ENSMUSG00000032883	MGI:1921455	Acsl3	473	1201	491	5269	3001	3914	3912	8.777	19.561	7.241	91.028	55.363	88.554	77.92	P	P	3.13365	4.28991	2.85625	3.4266	6.50823	5.79084	6.46848	6.28393	6.26287	-0.424588	0.180716	-0.569812	1.0182	0.719173	1.00163	0.9247	-3.34087	0.166006	0.233627	-0.122	0.916	-1.038
ENSOCUG00000005010	ENSMUSG00000031278	MGI:1354713	Acsl4	1954	4039	2430	2559	1215	1479	1840	36.257	65.784	35.838	44.209	22.414	33.462	36.65	P	P	5.18017	6.03967	5.16341	5.46108	5.46628	4.48636	5.06446	5.19573	5.05321	0.646772	1.09672	0.637996	0.583889	0.175435	0.416401	0.471115	1.91109	0.258928	0.329056	0.872	0.4115	0.4605
ENSOCUG00000003593	ENSMUSG00000024981	MGI:1919129	Acsl5	2202	3349	2929	2302	1041	952	1327	40.858	54.546	43.197	39.77	19.204	21.539	26.432	P	P	5.35256	5.7694	5.43286	5.51827	5.31359	4.26337	4.42887	4.72419	4.68251	0.737016	0.955237	0.779055	0.520244	0.0824893	0.151474	0.274568	4.04904	0.0344894	0.0769975	0.846	0.257	0.589
ENSOCUG00000005927	ENSMUSG00000030972	MGI:2444086	Acsm5	16	6	11	1460	1715	1174	1146	0.297	0.098	0.162	25.223	31.638	26.562	22.826	A	P	-1.75204	-3.35515	-2.6239	-2.57703	4.65667	4.98361	4.73127	4.51263	4.72105	-2.98227	-3.8215	-3.43869	0.246426	0.3827	0.27752	0.186385	-8.70869	0.070054	0.125653	-3.402	0.27325	-3.67525
ENSOCUG00000013125	ENSMUSG00000027452	MGI:1915988	Acss1	589	787	778	2503	1556	982	1010	10.929	12.818	11.474	43.242	28.705	22.218	20.117	P	P	3.45008	3.68011	3.52029	3.55016	5.43436	4.84324	4.47363	4.33038	4.7704	-0.258937	-0.138517	-0.222181	0.570584	0.324192	0.170132	0.110419	-4.13919	0.0143886	0.0416045	-0.199	0.29375	-0.49275
ENSOCUG00000002260	ENSMUSG00000027605	MGI:1890410	Acss2	1212	1478	1235	723	919	492	720	22.489	24.073	18.214	12.491	16.954	11.131	14.341	P	P	4.49113	4.58932	4.18696	4.42247	3.64277	4.08354	3.47657	3.84209	3.76124	0.286057	0.337458	0.126823	-0.17619	0.0075309	-0.245466	-0.0931097	7.27412	0.00209883	0.011153	0.3115	-0.1265	0.438
ENSOCUG00000008193	ENSMUSG00000035783	MGI:87909	Acta2	66323	48989	50826	217421	326186	202959	291971	1230.63	797.897	749.584	3756.18	6017.51	4591.93	5815.56	P	P	10.2652	9.64006	9.54995	9.81839	11.8751	12.555	12.1649	12.5057	12.2751	3.30879	2.98154	2.93437	3.2552	3.5386	3.37601	3.51807	-1.56684	0.312343	0.380734	3.1455	3.422	-0.2765
ENSOCUG00000003663	ENSMUSG00000059430	MGI:104589	Actg2	1635	1564	1718	21089	23792	22464	23739	30.338	25.473	25.337	364.335	438.917	508.246	472.84	P	P	4.92303	4.67091	4.66318	4.75238	8.50912	8.77781	8.98938	8.88521	8.79038	0.512159	0.380173	0.376126	1.85221	1.9642	2.05239	2.00897	-19.3356	0.00324839	0.014765	0.446	1.96925	-1.52325
ENSOCUG00000017883	ENSMUSG00000027671	MGI:1861453	Actl6a	578	572	561	918	703	611	785	10.725	9.316	8.274	15.859	12.969	13.824	15.636	P	P	3.42288	3.21976	3.04852	3.23039	3.98727	3.697	3.78908	3.96679	3.86003	-0.273176	-0.379512	-0.469154	-0.0325953	-0.153587	-0.115204	-0.0411338	-3.947	0.0800844	0.138264	-0.3265	-0.08575	-0.24075
ENSOCUG00000015449	ENSMUSG00000015143	MGI:2137706	Actn1	14636	14680	16133	40128	35021	22154	29389	271.572	239.097	237.93	693.255	646.071	501.232	585.378	P	P	8.08519	7.90145	7.89439	7.96035	9.43724	9.33555	8.96933	9.19323	9.23384	2.16756	2.07137	2.06768	2.23907	2.19668	2.04404	2.13736	-0.540023	0.631979	0.681439	2.1195	2.15425	-0.03475
ENSOCUG00000003358	ENSMUSG00000021076	MGI:1891654	Actr10	1233	2267	1113	5203	4323	4180	5088	22.878	36.923	16.415	89.887	79.751	94.572	101.344	P	P	4.51591	5.20646	4.03691	4.58643	6.49005	6.31743	6.56334	6.66312	6.50849	0.299031	0.660532	0.0482673	1.01062	0.938667	1.04117	1.08276	-2.93421	0.198198	0.267425	0.48	1.0185	-0.5385
ENSOCUG00000005779	ENSMUSG00000025228	MGI:1858964	Actr1a	2789	5588	3237	3864	2430	1883	3119	51.75	91.013	47.739	66.755	44.829	42.603	62.125	P	P	5.69349	6.508	5.57711	5.9262	6.0608	5.48636	5.41287	5.9571	5.72928	0.915496	1.3419	0.85457	0.831696	0.592256	0.561626	0.788474	1.94103	0.267826	0.337548	1.1285	0.6935	0.435
ENSOCUG00000005975	ENSMUSG00000037351	MGI:1917446	Actr1b	2175	3933	2666	1537	1560	737	768	40.357	64.058	39.318	26.553	28.779	16.675	15.297	P	P	5.33476	6.0013	5.29713	5.5444	4.73082	4.84695	4.05958	3.9352	4.39314	0.727698	1.07664	0.707999	0.277333	0.325736	-0.0024568	-0.0542997	3.84268	0.0827144	0.141574	0.9025	0.13675	0.76575
ENSOCUG00000004906	ENSMUSG00000020152	MGI:1913963	Actr2	6752	11075	8480	30205	22018	24344	27884	125.284	180.382	125.063	521.824	406.19	550.78	555.401	P	P	6.96906	7.49491	6.96652	7.14349	9.02742	8.66601	9.10533	9.11739	8.97904	1.58326	1.85855	1.58193	2.06825	1.9176	2.10072	2.10575	-2.25824	0.229094	0.298481	1.721	2.04825	-0.32725
ENSOCUG00000024677	ENSMUSG00000026341	MGI:1921367	Actr3	7624	10804	8968	2520	1393	1382	1814	141.464	175.968	132.26	43.536	25.698	31.268	36.132	P	P	7.14429	7.45917	7.04724	7.2169	5.44413	4.6836	4.9666	5.1752	5.06738	1.675	1.83983	1.62419	0.574654	0.257648	0.375609	0.462557	12.5957	0.00295204	0.0138924	1.7575	0.418	1.3395
ENSOCUG00000000459	ENSMUSG00000056367	MGI:2661120	Actr3b	80	375	93	563	699	476	792	1.484	6.108	1.372	9.726	12.895	10.769	15.775	A	P	0.569886	2.61064	0.455826	1.21212	3.28191	3.68876	3.42887	3.97959	3.59479	-1.76673	-0.698391	-1.82644	-0.326604	-0.157019	-0.265347	-0.0357953	-1.92501	0.29961	0.368294	-1.2325	-0.19625	-1.03625
ENSOCUG00000006257	ENSMUSG00000037761	MGI:1924748	Actr5	316	370	460	378	365	267	290	5.863	6.026	6.784	6.53	6.734	6.041	5.776	P	P	2.55174	2.59127	2.76216	2.63506	2.70716	2.75137	2.59475	2.53015	2.64586	-0.729223	-0.708529	-0.619068	-0.566172	-0.547745	-0.613027	-0.639956	-5.44382	0.00591753	0.0223014	-0.719	-0.59175	-0.12725
ENSOCUG00000000141	ENSMUSG00000019948	MGI:1914269	Actr6	212	278	225	1071	834	1020	1093	3.934	4.528	3.318	18.503	15.386	23.077	21.771	A	P	1.97588	2.17883	1.73045	1.96172	4.20966	3.94352	4.52841	4.44431	4.28148	-1.03069	-0.924443	-1.15917	0.0601026	-0.0508314	0.192963	0.15791	-13.941	0.000706611	0.00618705	-0.9775	0.09	-1.0675
ENSOCUG00000009085	ENSMUSG00000015971	MGI:1860775	Actr8	1031	1358	1166	904	663	570	657	19.13	22.118	17.196	15.618	12.231	12.896	13.086	P	P	4.25779	4.46716	4.10402	4.27632	3.9651	3.61248	3.68887	3.70999	3.74411	0.163899	0.273505	0.0834018	-0.0418368	-0.188815	-0.156974	-0.148173	5.55177	0.0426989	0.0893162	0.219	-0.134	0.353
ENSOCUG00000002439	ENSMUSG00000026836	MGI:87911	Acvr1	1151	1375	1327	2065	2020	2077	2593	21.357	22.395	19.571	35.675	37.265	46.992	51.648	P	P	4.41663	4.4851	4.29062	4.39745	5.15685	5.21976	5.55434	5.69064	5.4054	0.247055	0.282901	0.181088	0.454909	0.481131	0.620593	0.677407	-5.17796	0.00893212	0.0296326	0.265	0.5585	-0.2935
ENSOCUG00000017934	ENSMUSG00000000532	MGI:1338944	Acvr1b	1291	1889	1626	345	288	230	214	23.955	30.767	23.98	5.96	5.313	5.204	4.263	P	P	4.58223	4.9433	4.58378	4.7031	2.57537	2.40954	2.37955	2.0917	2.36404	0.333747	0.522766	0.334558	-0.621105	-0.690226	-0.70273	-0.822708	11.0033	0.0242488	0.0601551	0.4285	-0.70925	1.13775
ENSOCUG00000009208	ENSMUSG00000026834	MGI:2661081	Acvr1c	460	179	333	4	6	0	4	8.535	2.915	4.911	0.069	0.111	0	0.08	P	A	3.09345	1.5437	2.29605	2.31107	-3.85508	-3.17542	-5.46595	-3.64976	-4.03655	-0.445636	-1.25693	-0.86308	-3.30145	-3.01816	-3.9729	-3.21587	5.54535	0.052441	0.102408	-0.8515	-3.377	2.5255
ENSOCUG00000016398	ENSMUSG00000052155	MGI:102806	Acvr2a	954	1312	1043	257	296	236	376	17.702	21.369	15.382	4.44	5.461	5.339	7.489	P	P	4.1458	4.41744	3.94319	4.16881	2.15054	2.44907	2.4167	2.90483	2.48028	0.105276	0.247479	-0.000792583	-0.798182	-0.67375	-0.687243	-0.483782	8.68312	0.00449245	0.0185476	0.176	-0.66075	0.83675
ENSOCUG00000022530	ENSMUSG00000000530	MGI:1338946	Acvrl1	2014	2118	2271	1477	1553	1520	840	37.37	34.496	33.493	25.517	28.65	34.39	16.731	P	P	5.22381	5.10838	5.06578	5.13265	4.67337	4.84046	5.10391	4.06448	4.67056	0.669614	0.609186	0.586887	0.253387	0.323032	0.432844	-0.000411784	4.00004	0.0201626	0.0527971	0.6395	0.25225	0.38725
ENSOCUG00000010026	ENSMUSG00000023262	MGI:87913	Acy1	129	170	148	1474	1426	1120	846	2.394	2.769	2.183	25.465	26.307	25.34	16.851	A	P	1.25918	1.46928	1.12612	1.28486	4.67044	4.71737	4.66334	4.07475	4.53148	-1.40588	-1.2959	-1.47554	0.252165	0.271728	0.249204	0.00386828	-18.3741	0.000152826	0.00289773	-1.351	0.19425	-1.54525
ENSOCUG00000010190	ENSMUSG00000008822	MGI:1913454	Acyp1	107	168	154	576	450	327	356	1.985	2.736	2.271	9.951	8.302	7.398	7.091	A	P	0.989425	1.45221	1.18345	1.20836	3.31484	3.0534	2.8872	2.82597	3.02035	-1.5471	-1.30483	-1.44553	-0.312877	-0.421853	-0.491127	-0.51665	-7.65891	0.0490921	0.0977943	-1.426	-0.43575	-0.99025
ENSOCUG00000015408	ENSMUSG00000060923	MGI:1922822	Acyp2	215	425	182	597	537	569	706	3.989	6.922	2.684	10.314	9.907	12.874	14.062	A	P	1.99615	2.79121	1.42446	2.07061	3.36651	3.30839	3.68634	3.81376	3.54375	-1.02008	-0.60386	-1.31936	-0.291343	-0.315565	-0.15803	-0.104918	-2.77572	0.197574	0.266954	-0.812	-0.2175	-0.5945
ENSOCUG00000010107	ENSMUSG00000017697	MGI:87916	Ada	94	129	129	1012	2016	1158	1432	1.744	2.101	1.902	17.483	37.191	26.2	28.523	A	P	0.802547	1.07112	0.927895	0.933852	4.12791	5.2169	4.71147	4.83405	4.72258	-1.64493	-1.50434	-1.57931	0.0260278	0.479939	0.269269	0.320362	-15.7275	0.000144228	0.00278554	-1.5745	0.27375	-1.84825
ENSOCUG00000024818	ENSMUSG00000027259	MGI:1923144	Adal	261	395	280	107	82	61	130	4.843	6.433	4.129	1.849	1.513	1.38	2.589	P	A	2.27586	2.6856	2.04595	2.3358	0.886387	0.597168	0.464792	1.3726	0.830238	-0.873645	-0.659148	-0.994006	-1.32511	-1.44566	-1.50084	-1.12244	4.26655	0.0392539	0.0841018	-0.7665	-1.3485	0.582
ENSOCUG00000016023	ENSMUSG00000054693	MGI:109548	Adam10	3156	4293	4296	3077	1575	1639	2805	58.56	69.921	63.358	53.159	29.056	37.082	55.871	P	P	5.87184	6.12766	5.98545	5.99498	5.73223	4.86075	5.21266	5.80402	5.40241	1.00886	1.14279	1.06834	0.694741	0.331491	0.478171	0.724666	4.51439	0.0117959	0.0363145	1.076	0.55725	0.51875
ENSOCUG00000000736	ENSMUSG00000020926	MGI:1098667	Adam11	789	898	1005	4	4	6	0	14.64	14.626	14.822	0.069	0.074	0.136	0	P	A	3.87184	3.87046	3.88965	3.87732	-3.85508	-3.76038	-2.88098	-5.64976	-4.03655	-0.0381455	-0.0388674	-0.0288229	-3.30145	-3.26198	-2.89543	-4.04952	13.7809	0.000826895	0.00657662	-0.0385	-3.377	3.3385
ENSOCUG00000008781	ENSMUSG00000054555	MGI:105378	Adam12	629	793	1130	521	264	696	624	11.671	12.916	16.665	9.001	4.87	15.747	12.429	P	P	3.54487	3.69107	4.05877	3.7649	3.17006	2.28401	3.977	3.63564	3.26668	-0.209313	-0.132781	0.0597159	-0.373226	-0.74255	-0.0368768	-0.179163	1.02739	0.372742	0.439801	-0.171	-0.333	0.162
ENSOCUG00000007070	ENSMUSG00000028041	MGI:1333882	Adam15	2075	2398	2625	4055	5354	4072	2977	38.502	39.057	38.714	70.055	98.771	92.129	59.297	P	P	5.26685	5.2875	5.27477	5.27638	6.13041	6.62602	6.52558	5.88988	6.29297	0.69215	0.702961	0.696294	0.86071	1.06729	1.02543	0.760453	-3.21527	0.0479673	0.0964403	0.6975	0.92825	-0.23075
ENSOCUG00000010474	ENSMUSG00000052593	MGI:1096335	Adam17	2875	3839	3440	3496	2103	1639	2253	53.346	62.527	50.733	60.397	38.796	37.082	44.876	P	P	5.7373	5.9664	5.66486	5.78952	5.91641	5.27785	5.21266	5.48787	5.4737	0.938433	1.05837	0.900508	0.771511	0.505346	0.478171	0.592886	4.59354	0.0157163	0.0441955	0.998	0.587	0.411
ENSOCUG00000001235	ENSMUSG00000011256	MGI:105377	Adam19	1749	3215	1858	1144	893	820	704	32.453	52.364	27.402	19.764	16.474	18.552	14.022	P	P	5.02027	5.71049	4.7762	5.16899	4.30479	4.04213	4.21354	3.80967	4.09253	0.563064	0.924396	0.435292	0.0997543	-0.00972746	0.0617167	-0.106624	3.93352	0.135932	0.201772	0.7435	0.01125	0.73225
ENSOCUG00000015436	ENSMUSG00000040537	MGI:1340046	Adam22	625	2359	733	129	28	39	56	11.597	38.422	10.81	2.229	0.517	0.882	1.115	P	A	3.53567	5.26385	3.43434	4.07795	1.15615	-0.953029	-0.180543	0.157591	0.0450418	-0.214131	0.690577	-0.26718	-1.21267	-2.09182	-1.76983	-1.62889	3.92466	0.108495	0.171125	0.2385	-1.676	1.9145
ENSOCUG00000010659	ENSMUSG00000025964	MGI:1345162	Adam23	690	2395	602	21	4	20	12	12.803	39.008	8.878	0.363	0.074	0.452	0.239	P	A	3.67841	5.2857	3.15029	4.03813	-1.46276	-3.76038	-1.14402	-2.0648	-2.10799	-0.139406	0.702016	-0.415881	-2.30429	-3.26198	-2.17143	-2.55523	5.87709	0.0391031	0.0839452	0.2815	-2.573	2.8545
ENSOCUG00000012683	ENSMUSG00000027318	MGI:1341813	Adam33	922	635	1108	96	133	132	204	17.108	10.342	16.341	1.659	2.454	2.986	4.063	P	A	4.09658	3.3705	4.03041	3.8325	0.729882	1.2949	1.57845	2.02266	1.40647	0.0795076	-0.300598	0.0448668	-1.39034	-1.15483	-1.03664	-0.851486	4.5062	0.058214	0.11059	-0.1105	-1.10825	0.99775
ENSOCUG00000001216	ENSMUSG00000025473	MGI:107825	Adam8	1909	3679	3625	3490	2371	1715	1756	35.422	59.921	53.462	60.294	43.74	38.802	34.976	P	P	5.14656	5.90499	5.74043	5.59733	5.91393	5.4509	5.27805	5.12831	5.4428	0.629176	1.02622	0.940071	0.770478	0.577475	0.505428	0.443016	1.20382	0.407233	0.471959	0.8275	0.57375	0.25375
ENSOCUG00000013380	ENSMUSG00000031555	MGI:105376	Adam9	6683	8060	8163	26497	16071	23030	23850	124.004	131.275	120.388	457.764	296.479	521.051	475.051	P	P	6.95424	7.03645	6.91155	6.96741	8.83846	8.21179	9.02528	8.89194	8.74187	1.5755	1.61854	1.55316	1.98949	1.72827	2.06736	2.01178	-4.47971	0.0154374	0.0436763	1.5975	1.949	-0.3515
ENSOCUG00000016362	ENSMUSG00000022893	MGI:109249	Adamts1	4065	4711	5199	7008	7950	6656	5497	75.426	76.729	76.675	121.071	146.662	150.591	109.491	P	P	6.237	6.26171	6.26069	6.25313	6.91971	7.19636	7.23449	6.77467	7.03131	1.20002	1.21296	1.21243	1.18971	1.30502	1.32092	1.12925	-0.638424	0.567028	0.621533	1.2065	1.23625	-0.02975
ENSOCUG00000026658	ENSMUSG00000024299	MGI:2449112	Adamts10	4580	4738	6475	1586	2374	1432	968	84.982	77.169	95.494	27.4	43.796	32.399	19.281	P	P	6.40909	6.26995	6.57733	6.41879	4.7761	5.45272	5.01787	4.2691	4.87895	1.29012	1.21728	1.37819	0.296205	0.578236	0.396981	0.0848773	8.38212	0.00167409	0.00971594	1.2535	0.339	0.9145
ENSOCUG00000006357	ENSMUSG00000047497	MGI:2146046	Adamts12	992	1042	1011	533	532	731	450	18.407	16.971	14.91	9.208	9.814	16.539	8.963	P	P	4.20215	4.08503	3.89823	4.06181	3.20291	3.2949	4.04778	3.16402	3.4274	0.134776	0.0734598	-0.0243273	-0.359533	-0.321191	-0.00737246	-0.375745	4.00197	0.0194351	0.0517225	0.104	-0.266	0.37
ENSOCUG00000017775	ENSMUSG00000059901	MGI:2179942	Adamts14	111	160	203	431	463	173	151	2.06	2.606	2.994	7.446	8.541	3.914	3.008	A	P	1.04237	1.38182	1.582	1.3354	2.89646	3.09448	1.96868	1.58864	2.38707	-1.51938	-1.34168	-1.23688	-0.487267	-0.404727	-0.873986	-1.0324	-4.18067	0.0139167	0.040768	-1.4305	-0.6995	-0.731
ENSOCUG00000000374	ENSMUSG00000033453	MGI:2449569	Adamts15	3113	2354	2806	1399	1725	1255	875	57.762	38.34	41.383	24.169	31.823	28.394	17.428	P	P	5.85205	5.26079	5.37097	5.4946	4.5951	4.992	4.82753	4.12338	4.6345	0.998502	0.688974	0.746654	0.220761	0.386196	0.317642	0.0241364	3.49007	0.104215	0.166614	0.844	0.23725	0.60675
ENSOCUG00000014350	ENSMUSG00000053399	MGI:2442600	Adamts18	4	8	8	690	402	245	343	0.074	0.13	0.118	11.92	7.416	5.543	6.832	A	P	-3.75204	-2.94011	-3.08333	-3.2585	3.57537	2.89067	2.47069	2.7723	2.92726	-4.02928	-3.60423	-3.67921	-0.204283	-0.489683	-0.664737	-0.53902	-14.2966	0.0157597	0.0442919	-3.8165	-0.4745	-3.342
ENSOCUG00000001035	ENSMUSG00000036545	MGI:1347356	Adamts2	8787	8405	10457	5799	5423	5947	4811	163.043	136.894	154.22	100.184	100.044	134.55	95.827	P	P	7.34911	7.09692	7.26885	7.23829	6.64651	6.64449	7.072	6.58236	6.73634	1.78222	1.6502	1.7402	1.07583	1.07499	1.25319	1.04909	7.43906	0.0155119	0.0437725	1.716	1.11325	0.60275
ENSOCUG00000013498	ENSMUSG00000006403	MGI:1339949	Adamts4	452	406	394	284	100	378	130	8.387	6.613	5.811	4.906	1.845	8.552	2.589	P	A	3.06814	2.72522	2.53872	2.77736	2.29467	0.883473	3.0963	1.3726	1.91176	-0.458887	-0.638403	-0.736039	-0.738109	-1.32632	-0.403972	-1.12244	1.56192	0.196336	0.265688	-0.5485	-0.8975	0.349
ENSOCUG00000002859	ENSMUSG00000022894	MGI:1346321	Adamts5	4698	4398	5082	436	233	290	220	87.172	71.631	74.95	7.532	4.298	6.561	4.382	P	P	6.44579	6.16252	6.22785	6.27872	2.9131	2.1038	2.71396	2.1316	2.46562	1.30933	1.16104	1.19523	-0.480331	-0.817665	-0.563337	-0.80608	16.8082	0.000206877	0.00329344	1.235	-0.66675	1.90175
ENSOCUG00000001525	ENSMUSG00000046169	MGI:1347348	Adamts6	1742	1509	1549	747	691	640	671	32.323	24.577	22.845	12.905	12.748	14.48	13.365	P	P	5.01449	4.61927	4.51379	4.71585	3.68988	3.67216	3.85598	3.74041	3.73961	0.560035	0.353135	0.297918	-0.156552	-0.163941	-0.0873186	-0.135494	5.64317	0.102272	0.164479	0.4565	-0.13575	0.59225
ENSOCUG00000026922	ENSMUSG00000032363	MGI:1347346	Adamts7	244	413	495	765	1141	713	511	4.527	6.727	7.3	13.216	21.049	16.132	10.178	P	P	2.1787	2.74989	2.86795	2.59884	3.72424	4.3957	4.01181	3.34742	3.86979	-0.924513	-0.625492	-0.563684	-0.142234	0.137647	-0.0223653	-0.2993	-3.9366	0.0686232	0.123909	-0.775	-0.08125	-0.69375
ENSOCUG00000000370	ENSMUSG00000031994	MGI:1353468	Adamts8	460	439	378	528	802	644	748	8.535	7.15	5.575	9.122	14.795	14.57	14.899	P	P	3.09345	2.83797	2.47891	2.80344	3.18931	3.88707	3.86497	3.89713	3.70962	-0.445636	-0.579382	-0.76735	-0.365201	-0.0743589	-0.0835719	-0.0701673	-3.70778	0.0297593	0.069448	-0.5125	-0.14825	-0.36425
ENSOCUG00000000109	ENSMUSG00000030022	MGI:1916320	Adamts9	1189	1581	1537	864	497	988	843	22.062	25.75	22.668	14.927	9.169	22.353	16.791	P	P	4.46349	4.68651	4.50257	4.55086	3.89981	3.19672	4.48242	4.06963	3.91214	0.271586	0.388338	0.292044	-0.0690517	-0.362114	0.173795	0.00173205	3.12759	0.035634	0.0787599	0.33	-0.06375	0.39375
ENSOCUG00000004895	ENSMUSG00000066113	MGI:1924989	Adamtsl1	711	530	548	850	342	356	858	13.193	8.632	8.082	14.685	6.309	8.054	17.09	P	P	3.72166	3.10974	3.0147	3.28203	3.87624	2.65747	3.00979	4.09507	3.40964	-0.116763	-0.437109	-0.486862	-0.0788755	-0.586885	-0.440031	0.0123381	-0.0163108	0.988128	0.989654	-0.277	-0.2735	-0.0035
ENSOCUG00000002672	ENSMUSG00000070469	MGI:3028499	Adamtsl3	4641	4509	5336	3894	3122	2946	3596	86.114	73.439	78.696	67.273	57.595	66.653	71.626	P	P	6.42818	6.19848	6.29821	6.30829	6.07196	5.84787	6.0586	6.16241	6.03521	1.30011	1.17986	1.23207	0.836347	0.742943	0.830778	0.874051	6.33964	0.0497167	0.0984115	1.24	0.821	0.419
ENSOCUG00000000927	ENSMUSG00000015850	MGI:2389008	Adamtsl4	1081	1061	1301	7579	12952	6797	7587	20.058	17.281	19.187	130.935	238.94	153.781	151.12	P	P	4.32611	4.1111	4.26207	4.23309	7.03271	7.9005	7.26474	7.23955	7.35938	0.199666	0.0871072	0.166143	1.23681	1.59852	1.33352	1.32302	-12.7348	0.000284119	0.00388696	0.1435	1.37325	-1.22975
ENSOCUG00000015269	ENSMUSG00000020709	MGI:2663075	Adap2	660	1219	1186	3030	1414	1078	1074	12.246	19.854	17.491	52.347	26.086	24.39	21.392	P	P	3.61428	4.31137	4.12856	4.01807	5.71002	4.70518	4.6082	4.41901	4.8606	-0.172979	0.191951	0.0962467	0.685485	0.266646	0.22622	0.147365	-1.47118	0.282738	0.351957	0.0095	0.33125	-0.32175
ENSOCUG00000008544	ENSMUSG00000027951	MGI:1889575	Adar	1556	2888	2169	6565	3767	2962	4390	28.872	47.038	31.989	113.417	69.494	67.015	87.441	P	P	4.85158	5.55574	4.99948	5.1356	6.8255	6.11882	6.06641	6.45024	6.36524	0.474755	0.843385	0.55218	1.15044	0.855879	0.834035	0.994024	-1.51301	0.32517	0.393399	0.659	0.9585	-0.2995
ENSOCUG00000004683	ENSMUSG00000020262	MGI:891999	Adarb1	4237	4955	4446	5115	6882	4322	4054	78.618	80.703	65.57	88.367	126.96	97.785	80.749	P	P	6.29679	6.33456	6.03496	6.2221	6.46544	6.98823	6.61154	6.33537	6.60014	1.23132	1.2511	1.09426	1.00036	1.21827	1.06126	0.946142	3.09697	0.0496781	0.0983812	1.241	1.05625	0.18475
ENSOCUG00000017437	ENSMUSG00000021044	MGI:1919363	Adck1	393	458	408	431	321	154	226	7.292	7.46	6.017	7.446	5.922	3.484	4.502	P	P	2.86634	2.89909	2.58909	2.78484	2.89646	2.56605	1.80084	2.17042	2.35844	-0.564527	-0.547382	-0.709668	-0.487267	-0.624992	-0.943946	-0.789899	1.56104	0.214995	0.284099	-0.556	-0.7115	0.1555
ENSOCUG00000012813	ENSMUSG00000046947	MGI:1889336	Adck2	271	376	300	159	164	120	62	5.028	6.124	4.424	2.747	3.025	2.715	1.235	P	A	2.33011	2.61448	2.14549	2.36336	1.4578	1.59717	1.44095	0.304433	1.20009	-0.845249	-0.696379	-0.941898	-1.08693	-1.02884	-1.09396	-1.56768	2.90775	0.0438111	0.090767	-0.7705	-1.1945	0.424
ENSOCUG00000003446	ENSMUSG00000022550	MGI:2679274	Adck5	246	299	348	332	477	309	171	4.565	4.87	5.132	5.736	8.8	6.991	3.406	A	P	2.19047	2.28389	2.35961	2.27799	2.51996	3.13746	2.80552	1.76809	2.55776	-0.918348	-0.869443	-0.829803	-0.644202	-0.386814	-0.525175	-0.957598	-2.134	0.116043	0.17991	-0.8935	-0.6285	-0.265
ENSOCUG00000002264	ENSMUSG00000026567	MGI:2660854	Adcy10	16	11	28	1344	523	298	738	0.297	0.179	0.413	23.219	9.648	6.742	14.7	A	P	-1.75204	-2.48068	-1.27598	-1.83623	4.53724	3.27028	2.75322	3.87771	3.60961	-2.98227	-3.36371	-2.73305	0.196643	-0.331451	-0.546972	-0.0782609	-11.9536	0.00287174	0.0136327	-3.173	-0.18975	-2.98325
ENSOCUG00000008557	ENSMUSG00000021536	MGI:99676	Adcy2	188	228	197	626	134	605	222	3.488	3.713	2.905	10.815	2.472	13.688	4.422	A	P	1.80255	1.89278	1.53872	1.74468	3.43494	1.30571	3.77485	2.14465	2.66504	-1.12143	-1.07419	-1.25954	-0.262819	-1.15033	-0.121138	-0.800638	-2.14019	0.120134	0.184022	-1.0975	-0.58375	-0.51375
ENSOCUG00000015443	ENSMUSG00000020654	MGI:99675	Adcy3	1126	1454	1863	1318	1266	866	1334	20.893	23.682	27.476	22.77	23.355	19.593	26.571	P	P	4.38495	4.5657	4.78008	4.57691	4.50905	4.54568	4.29228	4.73178	4.5197	0.230469	0.325093	0.437322	0.184896	0.200161	0.0945385	0.277732	1.4538	0.266026	0.335838	0.2775	0.1895	0.088
ENSOCUG00000002958	ENSMUSG00000022220	MGI:99674	Adcy4	751	845	1069	357	368	359	228	13.935	13.763	15.766	6.168	6.789	8.122	4.541	P	P	3.80063	3.7827	3.97871	3.85401	2.6247	2.76318	3.0219	2.18313	2.64822	-0.0754254	-0.0848123	0.0178037	-0.600544	-0.542823	-0.434984	-0.784601	6.96049	0.00590389	0.0222932	-0.08	-0.591	0.511
ENSOCUG00000015141	ENSMUSG00000022840	MGI:99673	Adcy5	8075	6924	9707	1486	2048	1040	1602	149.832	112.773	143.159	25.672	37.782	23.53	31.909	P	P	7.2272	6.81728	7.16148	7.06865	4.68214	5.23962	4.55642	4.99589	4.86852	1.7184	1.5038	1.68399	0.257041	0.489409	0.20464	0.387821	10.2265	0.0139232	0.040768	1.611	0.33475	1.27625
ENSOCUG00000007394	ENSMUSG00000022994	MGI:87917	Adcy6	2566	2831	3368	1684	2346	1379	1245	47.612	46.109	49.671	29.093	43.279	31.2	24.798	P	P	5.57326	5.52698	5.63434	5.5782	4.8626	5.4356	4.96346	4.63217	4.97346	0.852557	0.82833	0.884533	0.332259	0.571101	0.374302	0.236211	6.46121	0.00626795	0.0232172	0.8405	0.37825	0.46225
ENSOCUG00000003091	ENSMUSG00000031659	MGI:102891	Adcy7	6251	7020	8113	5470	3278	2089	1835	115.988	114.337	119.651	94.5	60.473	47.263	36.55	P	P	6.85783	6.83714	6.90269	6.86589	6.56225	5.91822	5.56265	5.1918	5.80873	1.52503	1.5142	1.54852	1.04071	0.772264	0.624057	0.469479	6.50824	0.00727658	0.025673	1.5195	0.7265	0.793
ENSOCUG00000007904	ENSMUSG00000005580	MGI:108450	Adcy9	1267	1460	1497	535	428	265	354	23.509	23.779	22.078	9.243	7.896	5.996	7.051	P	P	4.55516	4.57164	4.46453	4.53044	3.20832	2.98108	2.5839	2.81784	2.89779	0.319575	0.328204	0.272128	-0.357281	-0.451996	-0.617549	-0.520038	14.687	0.000647181	0.00595513	0.324	-0.48675	0.81075
ENSOCUG00000000120	ENSMUSG00000029778	MGI:108449	Adcyap1r1	462	3049	509	280	296	160	210	8.572	49.66	7.507	4.837	5.461	3.62	4.183	P	A	3.09971	5.63401	2.90819	3.88064	2.2742	2.44907	1.85598	2.06448	2.16093	-0.44236	0.884357	-0.54262	-0.746638	-0.67375	-0.920961	-0.834055	1.52596	0.367041	0.43449	0.221	-0.794	1.015
ENSOCUG00000024333	ENSMUSG00000029106	MGI:87918	Add1	4733	6543	5590	5333	4259	3303	4052	87.821	106.568	82.442	92.133	78.57	74.73	80.709	P	P	6.4565	6.73563	6.3653	6.51914	6.52565	6.29592	6.22362	6.33465	6.34496	1.31493	1.46106	1.26719	1.02546	0.929697	0.899562	0.945845	5.63224	0.074301	0.131283	1.388	0.95025	0.43775
ENSOCUG00000014450	ENSMUSG00000030000	MGI:87919	Add2	220	4083	366	52	28	36	8	4.082	66.501	5.398	0.898	0.517	0.814	0.159	P	A	2.02932	6.0553	2.43237	3.50566	-0.15464	-0.953029	-0.29602	-2.64976	-1.01336	-1.00271	1.10491	-0.791715	-1.75903	-2.09182	-1.81796	-2.79905	2.00615	0.27561	0.345115	0.051	-2.117	2.168
ENSOCUG00000029743	ENSMUSG00000025026	MGI:1351615	Add3	2815	2585	2637	3410	2710	3457	3080	52.233	42.103	38.891	58.911	49.994	78.214	61.348	P	P	5.70688	5.39584	5.28135	5.46135	5.88048	5.64369	6.28936	5.93895	5.93812	0.922504	0.759674	0.699739	0.756533	0.657837	0.926965	0.780907	0.615956	0.600663	0.652956	0.8415	0.78075	0.06075
ENSOCUG00000013420	ENSMUSG00000031486	MGI:1925810	Adgra2	1374	1471	1626	5029	6322	4156	4066	25.495	23.959	23.98	86.881	116.629	94.029	80.988	P	P	4.67212	4.58247	4.58378	4.61279	6.44098	6.86578	6.55503	6.33963	6.55036	0.380807	0.333873	0.334558	0.990162	1.16723	1.0377	0.947919	-12.8079	0.000233972	0.00353941	0.3575	1.03575	-0.67825
ENSOCUG00000000919	ENSMUSG00000029090	MGI:1917943	Adgra3	1595	1852	1785	1792	1627	1229	1163	29.595	30.164	26.325	30.959	30.015	27.806	23.165	P	P	4.8873	4.91476	4.71838	4.84014	4.95227	4.90761	4.79732	4.53387	4.79777	0.493452	0.507826	0.40502	0.369639	0.351024	0.305053	0.19524	4.89199	0.0139213	0.040768	0.5005	0.30525	0.19525
ENSOCUG00000005785	ENSMUSG00000028782	MGI:2451244	Adgrb2	56	409	158	824	1151	577	916	1.039	6.661	2.33	14.235	21.234	13.055	18.245	A	P	0.0553127	2.73585	1.22045	1.3372	3.83142	4.40829	3.70648	4.18944	4.03391	-2.03611	-0.632843	-1.42616	-0.0975568	0.142894	-0.149634	0.0516735	-1.87482	0.308462	0.37703	-1.3345	-0.01325	-1.32125
ENSOCUG00000005669	ENSMUSG00000044017	MGI:3041203	Adgrd1	1131	888	1369	404	318	714	574	20.986	14.463	20.19	6.98	5.866	16.154	11.433	P	P	4.39134	3.8543	4.33557	4.19374	2.80313	2.5525	4.01384	3.51514	3.22115	0.233816	-0.047325	0.204622	-0.52617	-0.630639	-0.0215224	-0.229388	2.2534	0.110497	0.173426	0.0935	-0.352	0.4455
ENSOCUG00000023375	ENSMUSG00000032915	MGI:1196464	Adgre4	158	83	145	2564	675	848	544	2.932	1.352	2.138	44.296	12.452	19.186	10.836	A	P	1.55174	0.434928	1.09658	1.02775	5.4691	3.63836	4.26198	3.4377	4.20178	-1.25273	-1.83738	-1.49101	0.585063	-0.178029	0.0819077	-0.261668	-4.59276	0.0478632	0.0962794	-1.545	0.05675	-1.60175
ENSOCUG00000021438	ENSMUSG00000002885	MGI:1347095	Adgre5	2773	2661	3368	2909	1535	1447	1168	51.453	43.34	49.671	50.256	28.318	32.738	23.265	P	P	5.68519	5.43764	5.63434	5.58572	5.65123	4.82364	5.0329	4.54006	5.01196	0.911151	0.781558	0.884533	0.660978	0.316021	0.403247	0.19782	3.84545	0.0188537	0.0505904	0.8465	0.3945	0.452
ENSOCUG00000001489	ENSMUSG00000056492	MGI:2182928	Adgrf5	1990	2043	2540	1508	1475	903	950	36.925	33.275	37.46	26.052	27.211	20.43	18.922	P	P	5.20651	5.05636	5.22728	5.16338	4.70334	4.76612	4.35264	4.24202	4.51603	0.66056	0.581957	0.671433	0.265878	0.292044	0.119697	0.0735899	6.50801	0.00345902	0.0153609	0.6215	0.188	0.4335
ENSOCUG00000007622	ENSMUSG00000031785	MGI:1340051	Adgrg1	447	929	587	594	556	445	348	8.294	15.131	8.657	10.262	10.257	10.068	6.932	P	P	3.05209	3.91942	3.11388	3.3618	3.35924	3.35856	3.33172	2.79318	3.21067	-0.467288	-0.013235	-0.434938	-0.294372	-0.294656	-0.305844	-0.530318	0.496185	0.698788	0.741233	-0.24	-0.35625	0.11625
ENSOCUG00000007324	ENSMUSG00000031298	MGI:2446854	Adgrg2	256	382	339	193	339	202	295	4.75	6.222	5	3.334	6.254	4.57	5.876	P	P	2.24796	2.63732	2.32181	2.40236	1.73738	2.64476	2.19227	2.55481	2.2823	-0.888254	-0.684423	-0.849593	-0.970399	-0.592183	-0.780791	-0.629676	-0.320582	0.773385	0.807505	-0.786	-0.74325	-0.04275
ENSOCUG00000002559	ENSMUSG00000039116	MGI:1916151	Adgrg6	461	1197	604	390	260	368	332	8.554	19.496	8.908	6.738	4.797	8.326	6.613	P	P	3.09658	4.2851	3.15507	3.51225	2.75225	2.26198	3.05762	2.72528	2.69928	-0.443996	0.178196	-0.413376	-0.547378	-0.751731	-0.420095	-0.558622	1.3707	0.385989	0.451916	-0.133	-0.5695	0.4365
ENSOCUG00000001836	ENSMUSG00000013033	MGI:1929461	Adgrl1	2162	3498	3160	26	42	44	29	40.116	56.973	46.604	0.449	0.775	0.995	0.578	P	A	5.32611	5.8322	5.54238	5.5669	-1.15464	-0.368066	-0.0065134	-0.791783	-0.580251	0.72317	0.988113	0.836387	-2.17585	-1.84799	-1.69729	-2.02461	16.5612	0.00182968	0.0102107	0.8555	-1.9365	2.792
ENSOCUG00000013639	ENSMUSG00000028184	MGI:2139714	Adgrl2	3081	3038	3409	8033	6358	5928	7956	57.168	49.481	50.276	138.779	117.293	134.12	158.47	P	P	5.83714	5.62879	5.6518	5.70591	7.11664	6.87397	7.06738	7.30806	7.09152	0.990698	0.881628	0.893671	1.27179	1.17064	1.25126	1.35158	-4.92556	0.0386942	0.0834489	0.9365	1.2615	-0.325
ENSOCUG00000001910	ENSMUSG00000037605	MGI:2441950	Adgrl3	156	939	118	567	446	318	556	2.895	15.294	1.74	9.796	8.228	7.195	11.075	P	P	1.53336	3.93487	0.79931	2.08918	3.29212	3.04052	2.84694	3.46918	3.16219	-1.26235	-0.00514867	-1.64663	-0.322347	-0.427223	-0.50791	-0.248547	-0.407235	0.752932	0.788435	-0.6335	-0.3765	-0.257
ENSOCUG00000011390	ENSMUSG00000039167	MGI:2655562	Adgrl4	450	456	488	825	613	1222	764	8.35	7.427	7.197	14.253	11.309	27.648	15.218	P	P	3.06174	2.89278	2.8474	2.93397	3.83317	3.49936	4.78908	3.92767	4.01232	-0.462236	-0.550688	-0.574441	-0.0968275	-0.235967	0.301618	-0.0574399	-3.94079	0.0194893	0.0517816	-0.5065	-0.022	-0.4845
ENSOCUG00000026540	ENSMUSG00000074207	MGI:87921	Adh1	659	383	808	439	278	235	402	12.228	6.238	11.916	7.584	5.129	5.317	8.007	P	P	3.61209	2.64109	3.57488	3.27602	2.923	2.35856	2.41057	3.00129	2.67335	-0.174124	-0.682448	-0.193605	-0.476207	-0.711478	-0.689797	-0.443574	0.577945	0.655588	0.702379	-0.428	-0.58025	0.15225
ENSOCUG00000004263	ENSMUSG00000028138	MGI:87929	Adh5	1236	1432	1284	5052	3722	2686	3415	22.934	23.323	18.936	87.279	68.664	60.77	68.021	P	P	4.51942	4.5437	4.2431	4.43541	6.44756	6.10148	5.9253	6.08791	6.14056	0.300866	0.313579	0.156209	0.992906	0.848652	0.775216	0.842995	-12.0395	0.00102262	0.00740659	0.3075	0.865	-0.5575
ENSOCUG00000008341	ENSMUSG00000025911	MGI:1923437	Adhfe1	417	279	380	253	318	195	299	7.737	4.544	5.604	4.371	5.866	4.412	5.956	P	P	2.95186	2.18401	2.48652	2.5408	2.12791	2.5525	2.14139	2.57424	2.34901	-0.519758	-0.921731	-0.763364	-0.807615	-0.630639	-0.802	-0.621577	-0.0252998	0.983517	0.986153	-0.721	-0.71575	-0.00525
ENSOCUG00000000530	ENSMUSG00000020629	MGI:2144929	Adi1	191	318	306	986	783	772	525	3.544	5.179	4.513	17.034	14.445	17.466	10.457	A	P	1.82539	2.37277	2.17406	2.12407	4.09036	3.85248	4.12651	3.38641	3.86394	-1.10947	-0.822913	-0.926942	0.0103763	-0.0887767	0.0254437	-0.283047	-5.52416	0.0550677	0.106236	-0.966	-0.08425	-0.88175
ENSOCUG00000026268	ENSMUSG00000022878	MGI:106675	Adipoq	1670	666	1134	2898	978	2800	2200	30.987	10.847	16.724	50.066	18.042	63.35	43.82	P	P	4.95359	3.43927	4.06387	4.15224	5.64576	4.17331	5.98527	5.45352	5.31446	0.528155	-0.264599	0.0623847	0.658699	0.0449488	0.800212	0.578571	-0.906342	0.496206	0.555036	0.1315	0.52075	-0.38925
ENSOCUG00000024164	ENSMUSG00000026457	MGI:1919924	Adipor1	2522	3589	3268	0	0	0	0	46.796	58.455	48.197	0	0	0	0	P	A	5.54831	5.86925	5.59086	5.66947	-5.85508	-5.76038	-5.46595	-5.64976	-5.68279	0.839494	1.00751	0.861769	-4.1351	-4.09563	-3.9729	-4.04952	54.5688	0.00313536	0.0144607	0.9235	-4.0635	4.987
ENSOCUG00000017118	ENSMUSG00000030168	MGI:93830	Adipor2	3884	3531	3967	2342	1608	1410	1833	72.068	57.51	58.505	40.461	29.665	31.901	36.51	P	P	6.17129	5.84575	5.8705	5.96251	5.33845	4.89067	4.99553	5.19023	5.10372	1.16562	0.995205	1.00816	0.530603	0.34396	0.387671	0.468823	6.80734	0.0415312	0.0875539	1.0805	0.433	0.6475
ENSOCUG00000009950	ENSMUSG00000039197	MGI:87930	Adk	1411	1645	1381	3498	2481	1999	3705	26.181	26.793	20.367	60.432	45.77	45.227	73.797	P	P	4.71046	4.74376	4.34817	4.6008	5.91723	5.51632	5.49912	6.20549	5.78454	0.400876	0.418309	0.211213	0.771855	0.604746	0.597575	0.892008	-4.3016	0.0218419	0.0559833	0.4095	0.71675	-0.30725
ENSOCUG00000009897	ENSMUSG00000030790	MGI:108058	Adm	417	303	456	568	666	370	572	7.737	4.935	6.725	9.813	12.286	8.371	11.393	P	P	2.95186	2.30306	2.74956	2.66816	3.29467	3.61899	3.06544	3.51011	3.3723	-0.519758	-0.859406	-0.625664	-0.321287	-0.1861	-0.416835	-0.231487	-2.26354	0.232242	0.301806	-0.6895	-0.28875	-0.40075
ENSOCUG00000014704	ENSMUSG00000051149	MGI:1338758	Adnp	71	85	90	2813	2171	1463	2187	1.317	1.384	1.327	48.598	40.051	33.1	43.561	A	P	0.397705	0.469279	0.408521	0.425168	5.60281	5.32376	5.04877	5.44497	5.35508	-1.85687	-1.8194	-1.85121	0.640798	0.524482	0.40986	0.575007	-45.3754	3.03203e-06	0.000578285	-1.838	0.5375	-2.3755
ENSOCUG00000009233	ENSMUSG00000053950	MGI:2448562	Adnp2	1049	1160	1118	2586	2758	1735	1910	19.464	18.893	16.488	44.676	50.88	39.254	38.044	P	P	4.28276	4.2398	4.04337	4.18864	5.48143	5.66902	5.29477	5.24959	5.4237	0.176971	0.154482	0.0516526	0.590201	0.668395	0.512401	0.493568	-9.6506	0.00129335	0.00841496	0.1655	0.566	-0.4005
ENSOCUG00000011706	ENSMUSG00000025236	MGI:1919391	Adpgk	1000	1251	1099	1108	884	747	593	18.555	20.375	16.208	19.142	16.308	16.901	11.812	P	P	4.21374	4.34875	4.01864	4.19371	4.25866	4.02752	4.07902	3.56212	3.98183	0.140842	0.211522	0.038707	0.0805266	-0.0158188	0.00564772	-0.209805	2.95699	0.0416816	0.0877949	0.1765	-0.03475	0.21125
ENSOCUG00000009508	ENSMUSG00000002844	MGI:1098234	Adprh	690	1085	813	2544	1356	971	1536	12.803	17.672	11.99	43.95	25.016	21.969	30.594	P	P	3.67841	4.14337	3.58378	3.80185	5.4578	4.64476	4.45738	4.9352	4.87379	-0.139406	0.104001	-0.188946	0.580354	0.24146	0.163358	0.362522	-2.33432	0.133004	0.198668	-0.0175	0.33675	-0.35425
ENSOCUG00000011038	ENSMUSG00000042558	MGI:2140364	Adprhl2	437	523	502	726	673	418	335	8.109	8.518	7.404	12.542	12.416	9.457	6.673	P	P	3.01945	3.09056	2.88821	2.9994	3.64875	3.63408	3.24141	2.73825	3.31562	-0.484376	-0.447151	-0.553079	-0.1737	-0.179813	-0.343484	-0.553212	-1.67926	0.184755	0.2534	-0.4655	-0.3125	-0.153
ENSOCUG00000005721	ENSMUSG00000050541	MGI:104774	Adra1b	42	48	48	422	776	372	376	0.779	0.782	0.708	7.291	14.316	8.416	7.489	A	P	-0.359725	-0.355149	-0.49837	-0.404415	2.86602	3.83953	3.07321	2.90483	3.1709	-2.25339	-2.25099	-2.32597	-0.499957	-0.0941769	-0.413594	-0.483782	-19.8079	0.000280791	0.00387369	-2.252	-0.373	-1.879
ENSOCUG00000007804	ENSMUSG00000031489	MGI:87939	Adrb3	398	209	296	0	4	4	0	7.385	3.404	4.365	0	0.074	0.09	0	P	A	2.88458	1.76725	2.12612	2.25932	-5.85508	-3.76038	-3.46595	-5.64976	-4.68279	-0.554978	-1.13991	-0.952036	-4.1351	-3.26198	-3.13925	-4.04952	7.16063	0.00841796	0.0283033	-0.8475	-3.6465	2.799
ENSOCUG00000016161	ENSMUSG00000022407	MGI:103202	Adsl	666	858	704	1368	838	758	1042	12.358	13.974	10.383	23.634	15.46	17.15	20.755	P	P	3.62734	3.80472	3.3761	3.60272	4.56277	3.95042	4.10011	4.37538	4.24717	-0.166144	-0.0732814	-0.297667	0.207286	-0.0479541	0.0144383	0.129176	-2.64676	0.0641496	0.118448	-0.1195	0.0755	-0.195
ENSOCUG00000013982	ENSMUSG00000015961	MGI:87948	Adss	1707	2504	1932	5551	2967	3246	4328	31.674	40.783	28.493	95.9	54.736	73.44	86.206	P	P	4.98521	5.34991	4.83255	5.05589	6.58345	5.77441	6.1985	6.42972	6.24652	0.544706	0.735629	0.464789	1.04955	0.712321	0.889094	0.985471	-2.22779	0.140447	0.206458	0.6405	0.909	-0.2685
ENSOCUG00000014914	ENSMUSG00000020473	MGI:1197012	Aebp1	29068	28992	35754	34018	37104	29595	25487	539.359	472.2	527.302	587.698	684.498	669.584	507.657	P	P	9.0751	8.88326	9.04248	9.00028	9.19893	9.4189	9.38712	8.98771	9.24817	2.68578	2.58535	2.66871	2.13974	2.23143	2.21818	2.0517	7.28488	0.0105556	0.0332601	2.6355	2.16025	0.47525
ENSOCUG00000016677	ENSMUSG00000030232	MGI:1338038	Aebp2	1701	2298	2148	581	417	377	577	31.562	37.428	31.679	10.037	7.693	8.53	11.493	P	P	4.98013	5.22605	4.98545	5.06387	3.32731	2.94352	3.09248	3.52266	3.22149	0.542047	0.67079	0.544832	-0.307679	-0.467653	-0.405565	-0.226253	11.449	0.003434	0.0153082	0.6065	-0.352	0.9585
ENSOCUG00000006708	ENSMUSG00000029094	MGI:1917542	Afap1	2828	3151	3317	144	146	125	73	52.474	51.321	48.919	2.488	2.693	2.828	1.454	P	A	5.71352	5.68148	5.61233	5.66911	1.31484	1.42944	1.49984	0.540061	1.19605	0.925984	0.90921	0.873009	-1.14652	-1.09875	-1.06941	-1.46947	22.7756	0.000165811	0.00298251	0.9175	-1.196	2.1135
ENSOCUG00000016114	ENSMUSG00000033032	MGI:2147199	Afap1l1	353	343	460	310	171	284	180	6.55	5.587	6.784	5.356	3.155	6.425	3.585	P	A	2.71148	2.48195	2.76216	2.65186	2.42104	1.65747	2.6838	1.84209	2.1511	-0.645597	-0.765756	-0.619068	-0.685432	-1.00371	-0.575909	-0.926753	0.786176	0.47576	0.534873	-0.706	-0.798	0.092
ENSOCUG00000011712	ENSMUSG00000025083	MGI:2147658	Afap1l2	610	934	777	735	1001	304	401	11.319	15.212	11.459	12.698	18.467	6.878	7.987	P	P	3.50062	3.92717	3.51844	3.64874	3.66652	4.20684	2.78198	2.99769	3.41326	-0.232479	-0.00918101	-0.223152	-0.166291	0.0589272	-0.534985	-0.445071	0.862432	0.4428	0.505115	-0.1205	-0.27175	0.15125
ENSOCUG00000002105	ENSMUSG00000029313	MGI:1100819	Aff1	2786	3624	3569	879	447	267	477	51.694	59.025	52.636	15.186	8.246	6.041	9.501	P	P	5.69194	5.88326	5.71797	5.76439	3.92464	3.04375	2.59475	3.24808	3.2028	0.914683	1.01484	0.928312	-0.0587012	-0.425876	-0.613027	-0.340705	10.5467	0.000572642	0.00559516	0.965	-0.35975	1.32475
ENSOCUG00000013873	ENSMUSG00000031189	MGI:1202294	Aff2	799	677	871	38	28	40	48	14.826	11.026	12.846	0.656	0.517	0.905	0.956	P	A	3.89001	3.4629	3.6832	3.6787	-0.607153	-0.953029	-0.144017	-0.064801	-0.44225	-0.0286333	-0.252226	-0.136901	-1.94765	-2.09182	-1.7546	-1.72159	12.3117	0.00381823	0.0164627	-0.1405	-1.87925	1.73875
ENSOCUG00000009532	ENSMUSG00000037138	MGI:106927	Aff3	977	839	1012	110	96	96	101	18.128	13.665	14.925	1.9	1.771	2.172	2.012	P	A	4.18017	3.77242	3.89966	3.95075	0.92628	0.824579	1.11902	1.00845	0.969581	0.123268	-0.0901942	-0.0235806	-1.30848	-1.35087	-1.22814	-1.27423	11.9185	0.040501	0.0861664	0.0165	-1.29025	1.30675
ENSOCUG00000013635	ENSMUSG00000049470	MGI:2136171	Aff4	8257	11022	8846	1321	769	600	983	153.209	179.518	130.461	22.822	14.187	13.575	19.58	P	P	7.25936	7.48799	7.02748	7.25827	4.51233	3.82646	3.76287	4.29128	4.09824	1.73524	1.85492	1.61384	0.186263	-0.0996261	-0.126129	0.0941242	18.4585	9.96414e-05	0.0023923	1.795	0.0135	1.7815
ENSOCUG00000005862	ENSMUSG00000038302	MGI:2148801	Afg1l	302	326	347	308	181	173	219	5.604	5.31	5.118	5.321	3.339	3.914	4.362	P	A	2.48636	2.40862	2.35546	2.41681	2.41171	1.73946	1.96868	2.12502	2.06122	-0.763448	-0.804148	-0.831976	-0.689324	-0.96953	-0.873986	-0.80882	0.832844	0.45646	0.51718	-0.7835	-0.8355	0.052
ENSOCUG00000014158	ENSMUSG00000031967	MGI:1928277	Afg3l1	1029	1303	1231	1352	918	739	749	19.093	21.222	18.155	23.357	16.935	16.72	14.919	P	P	4.25498	4.40751	4.18228	4.28159	4.5458	4.08197	4.06349	3.89906	4.14758	0.162433	0.24228	0.124373	0.200212	0.0068762	-0.000827135	-0.0693639	2.38593	0.0773689	0.135111	0.202	0.03425	0.16775
ENSOCUG00000006390	ENSMUSG00000049659	MGI:1923012	Aftph	2217	3372	2594	4169	2520	2586	3864	41.137	54.921	38.256	72.024	46.489	58.508	76.964	P	P	5.36235	5.77928	5.25763	5.46642	6.17041	5.53882	5.87056	6.26612	5.96148	0.742143	0.960406	0.687322	0.877382	0.614126	0.752401	0.917276	0.474059	0.685547	0.729016	0.851	0.79	0.061
ENSOCUG00000002031	ENSMUSG00000031521	MGI:104873	Aga	638	643	635	1977	1653	1953	1655	11.838	10.473	9.365	34.155	30.495	44.186	32.965	P	P	3.56537	3.38856	3.22728	3.39374	5.09402	4.93049	5.46553	5.04285	5.13322	-0.198583	-0.291142	-0.375575	0.42872	0.360558	0.583576	0.407394	-10.3406	0.00155487	0.00930723	-0.245	0.44525	-0.69025
ENSOCUG00000012670	ENSMUSG00000055013	MGI:2653690	Agap1	1855	3442	2532	526	470	384	529	34.42	56.061	37.342	9.087	8.671	8.688	10.537	P	P	5.10516	5.80892	5.22273	5.37894	3.18384	3.11613	3.11902	3.39736	3.20409	0.607504	0.975924	0.669051	-0.367483	-0.395704	-0.394502	-0.278482	6.18512	0.09465	0.155991	0.792	-0.359	1.151
ENSOCUG00000022100	ENSMUSG00000023353	MGI:2183446	Agap3	1213	2228	1722	3189	3608	2332	1997	22.507	36.288	25.396	55.093	66.561	52.761	39.777	P	P	4.49232	5.18142	4.66654	4.78009	5.78381	6.0566	5.72141	5.31386	5.71892	0.28668	0.647426	0.377882	0.71624	0.829946	0.69023	0.520354	-1.16204	0.419427	0.482756	0.467	0.689	-0.222
ENSOCUG00000014887	ENSMUSG00000029165	MGI:2441745	Agbl5	401	425	438	573	439	254	351	7.441	6.922	6.46	9.899	8.099	5.747	6.991	P	P	2.89542	2.79121	2.69145	2.79269	3.30731	3.01769	2.52274	2.80556	2.91333	-0.549307	-0.60386	-0.656082	-0.316017	-0.436736	-0.643043	-0.525156	-1.29379	0.269789	0.339531	-0.5765	-0.48025	-0.09625
ENSOCUG00000010426	ENSMUSG00000026159	MGI:1333754	Agfg1	2613	3559	2754	4013	2534	2949	3855	48.484	57.966	40.616	69.329	46.747	66.721	76.785	P	P	5.59945	5.85714	5.34398	5.60019	6.11539	5.54682	6.06007	6.26275	5.99625	0.866265	1.00117	0.732526	0.854449	0.617457	0.83139	0.915874	1.37634	0.265716	0.335655	0.9335	0.8045	0.129
ENSOCUG00000008631	ENSMUSG00000029722	MGI:2443267	Agfg2	317	561	373	1085	1316	948	1049	5.882	9.137	5.501	18.745	24.278	21.448	20.894	P	P	2.5563	3.19175	2.4597	2.73591	4.2284	4.60156	4.4228	4.38504	4.40945	-0.726837	-0.394177	-0.777406	0.0679124	0.223454	0.148942	0.133202	-4.15153	0.13721	0.203142	-0.5605	0.14325	-0.70375
ENSOCUG00000021999	ENSMUSG00000021681	MGI:1913799	Aggf1	1091	1603	1569	1613	1532	1040	1194	20.244	26.108	23.14	27.866	28.262	23.53	23.782	P	P	4.33939	4.70645	4.5323	4.52605	4.80045	4.82082	4.55642	4.57182	4.68738	0.206621	0.398775	0.307607	0.306356	0.314845	0.20464	0.211059	0.435406	0.72875	0.76716	0.303	0.25925	0.04375
ENSOCUG00000017543	ENSMUSG00000029916	MGI:1917173	Agk	489	695	533	442	318	283	357	9.073	11.32	7.861	7.636	5.866	6.403	7.111	P	P	3.18165	3.50076	2.97466	3.21902	2.93282	2.5525	2.67871	2.83002	2.74851	-0.399463	-0.232408	-0.507823	-0.472112	-0.630639	-0.57803	-0.514963	2.57966	0.177986	0.246479	-0.3155	-0.549	0.2335
ENSOCUG00000009465	ENSMUSG00000033400	MGI:1924809	Agl	1599	2190	1906	1945	1149	1108	1473	29.67	35.669	28.11	33.602	21.197	25.068	29.34	P	P	4.89091	5.1566	4.813	4.95351	5.07047	4.40578	4.6478	4.87478	4.74971	0.495343	0.634434	0.454556	0.418907	0.141848	0.242726	0.337337	3.04633	0.0682202	0.123477	0.5645	0.28525	0.27925
ENSOCUG00000017586	ENSMUSG00000050103	MGI:2442495	Agmo	432	373	369	27	42	24	40	8.016	6.075	5.442	0.466	0.775	0.543	0.797	P	A	3.00285	2.60292	2.44414	2.6833	-1.10019	-0.368066	-0.880983	-0.327835	-0.669269	-0.493067	-0.70243	-0.785549	-2.15316	-1.84799	-2.06179	-1.83122	10.4728	0.00595666	0.0224141	-0.5975	-1.9735	1.376
ENSOCUG00000023116	ENSMUSG00000041530	MGI:2446630	Ago1	1603	1989	2051	669	425	335	446	29.744	32.395	30.248	11.558	7.84	7.579	8.884	P	P	4.89452	5.01772	4.91878	4.94367	3.53078	2.97094	2.92207	3.15114	3.14373	0.49723	0.561726	0.509932	-0.222869	-0.456225	-0.476593	-0.381114	13.8228	0.000159132	0.0029424	0.5295	-0.38425	0.91375
ENSOCUG00000006066	ENSMUSG00000036698	MGI:2446632	Ago2	4512	6462	5905	769	495	395	488	83.721	105.248	87.087	13.285	9.132	8.937	9.72	P	P	6.38751	6.71765	6.44439	6.51652	3.73176	3.1909	3.15976	3.28097	3.34085	1.27882	1.45165	1.30859	-0.139098	-0.364539	-0.377518	-0.326995	16.2289	0.0048318	0.0194612	1.3655	-0.30225	1.66775
ENSOCUG00000006255	ENSMUSG00000028842	MGI:2446634	Ago3	2704	4112	3201	156	130	113	133	50.173	66.973	47.208	2.695	2.398	2.557	2.649	P	A	5.64884	6.06551	5.56097	5.75844	1.43032	1.26198	1.35423	1.40552	1.36301	0.89212	1.11025	0.846124	-1.09839	-1.16855	-1.1301	-1.10872	19.3204	0.029365	0.0687776	1.001	-1.1265	2.1275
ENSOCUG00000004076	ENSMUSG00000042500	MGI:1924100	Ago4	446	494	562	825	647	550	698	8.276	8.046	8.288	14.253	11.936	12.444	13.903	P	P	3.04886	3.00826	3.05109	3.03607	3.83317	3.57724	3.63734	3.79732	3.71127	-0.46898	-0.490235	-0.467809	-0.0968275	-0.203505	-0.178453	-0.111771	-11.9453	0.000391993	0.00456637	-0.4795	-0.14775	-0.33175
ENSOCUG00000005498	ENSMUSG00000034254	MGI:1932075	Agpat1	816	1354	1047	1503	1281	892	922	15.141	22.053	15.441	25.966	23.632	20.181	18.365	P	P	3.92038	4.4629	3.94871	4.11067	4.69855	4.56267	4.33495	4.19886	4.44876	-0.0127326	0.271278	0.00209835	0.263881	0.207244	0.112327	0.0555996	-0.20572	0.865896	0.888926	0.129	0.15975	-0.03075
ENSOCUG00000016795	ENSMUSG00000023827	MGI:1915512	Agpat4	679	1081	805	87	117	70	79	12.599	17.607	11.872	1.503	2.158	1.584	1.574	P	A	3.65523	4.13804	3.56951	3.78759	0.587863	1.10998	0.663338	0.654017	0.7538	-0.151544	0.101211	-0.196415	-1.44954	-1.23191	-1.41808	-1.42197	9.96131	0.0330168	0.0747387	-0.0255	-1.3805	1.355
ENSOCUG00000009429	ENSMUSG00000031467	MGI:1196345	Agpat5	607	997	605	1672	1504	1590	1880	11.263	16.238	8.923	28.886	27.746	35.974	37.446	P	P	3.49351	4.02134	3.15746	3.55744	4.85228	4.79421	5.16887	5.22675	5.01053	-0.236202	0.0401179	-0.412126	0.327959	0.303752	0.459919	0.484048	-3.38546	0.145254	0.211435	-0.098	0.394	-0.492
ENSOCUG00000011521	ENSMUSG00000042410	MGI:2443065	Agps	2080	3153	2366	1118	577	650	933	38.595	51.354	34.894	19.315	10.645	14.706	18.584	P	P	5.27033	5.6824	5.1249	5.35921	4.27162	3.41204	3.87835	4.21597	3.9445	0.693968	0.909689	0.617838	0.0859296	-0.272362	-0.0779952	0.0627316	6.27576	0.0182442	0.0493634	0.802	-0.05025	0.85225
ENSOCUG00000002964	ENSMUSG00000021557	MGI:2159437	Agtpbp1	2256	5341	2600	915	504	294	862	41.86	86.99	38.345	15.808	9.298	6.652	17.17	P	P	5.38751	6.44278	5.26096	5.69709	3.98255	3.2169	2.73373	4.10178	3.50874	0.755314	1.30775	0.689067	-0.0345637	-0.353704	-0.555099	0.015135	4.10653	0.0860523	0.145773	1.0315	-0.23225	1.26375
ENSOCUG00000025557	ENSMUSG00000049115	MGI:87964	Agtr1a	51	277	62	638	735	829	850	0.946	4.512	0.914	11.022	13.559	18.756	16.931	A	P	-0.0796169	2.17363	-0.129136	0.654959	3.46233	3.76122	4.22928	4.08156	3.8836	-2.10675	-0.927164	-2.13267	-0.251401	-0.126819	0.0682809	0.00670482	-2.4252	0.243249	0.313429	-1.517	-0.07575	-1.44125
ENSOCUG00000003803	ENSMUSG00000029007	MGI:1339977	Agtrap	1058	1241	1282	825	617	508	747	19.631	20.213	18.907	14.253	11.382	11.493	14.879	P	P	4.29508	4.33718	4.24085	4.29104	3.83317	3.50874	3.52274	3.8952	3.68996	0.183424	0.20546	0.155032	-0.0968275	-0.232056	-0.226222	-0.0709718	8.03521	0.00258774	0.0128227	0.194	-0.1565	0.3505
ENSOCUG00000014500	ENSMUSG00000026491	MGI:1915033	Ahctf1	3013	3985	3600	2711	2397	2093	2710	55.906	64.905	53.093	46.835	44.22	47.354	53.979	P	P	5.80494	6.02025	5.73045	5.85188	5.54953	5.46663	5.56541	5.75431	5.58397	0.973842	1.08656	0.934844	0.618588	0.584034	0.625208	0.703946	6.41958	0.0507854	0.0999777	1.0305	0.633	0.3975
ENSOCUG00000009722	ENSMUSG00000027893	MGI:2385184	Ahcyl1	3610	3918	4320	2200	1311	1146	1864	66.984	63.814	63.712	38.007	24.185	25.928	37.128	P	P	6.06574	5.99579	5.99348	6.01834	5.24821	4.59607	4.69645	5.21442	4.93879	1.11037	1.07375	1.07254	0.49299	0.221165	0.263004	0.478908	9.93724	0.00132622	0.00855336	1.092	0.364	0.728
ENSOCUG00000011749	ENSMUSG00000029772	MGI:1921590	Ahcyl2	1436	2629	1763	1428	1389	924	1655	26.645	42.819	26.001	24.67	25.624	20.905	32.965	P	P	4.7358	5.42019	4.70048	4.95216	4.6247	4.67945	4.3858	5.04285	4.6832	0.41414	0.772421	0.395653	0.233099	0.255919	0.133522	0.407394	1.78759	0.291242	0.360284	0.593	0.2575	0.3355
ENSOCUG00000008914	ENSMUSG00000037692	MGI:2444218	Ahdc1	1784	1892	2441	1296	1804	935	1005	33.102	30.816	36	22.39	33.28	21.154	20.018	P	P	5.04886	4.94558	5.16992	5.05479	4.48477	5.0566	4.40288	4.32322	4.56687	0.578028	0.523965	0.641407	0.174773	0.413124	0.140639	0.107434	4.5925	0.0119459	0.0366056	0.551	0.209	0.342
ENSOCUG00000011645	ENSMUSG00000019986	MGI:87971	Ahi1	611	1550	605	759	947	839	862	11.337	25.245	8.923	13.113	17.47	18.982	17.17	P	P	3.50299	4.65794	3.15746	3.7728	3.71288	4.12684	4.24658	4.10178	4.04702	-0.231241	0.373382	-0.412126	-0.146969	0.0255791	0.0754914	0.015135	0.257501	0.83794	0.864789	0.071	-0.00775	0.07875
ENSOCUG00000025901	ENSMUSG00000069833	MGI:1316648	Ahnak	177857	169629	179633	3915	2190	1079	1484	3300.15	2762.79	2649.24	67.636	40.401	24.412	29.559	P	P	11.6883	11.4319	11.3714	11.4972	6.07972	5.33633	4.60953	4.88551	5.22777	4.05381	3.91958	3.88788	0.839581	0.529722	0.226778	0.341811	23.3947	2.20481e-05	0.00128144	3.987	0.48475	3.50225
ENSOCUG00000003877	ENSMUSG00000019256	MGI:105043	Ahr	1141	1878	1314	1524	1046	1739	1281	21.171	30.587	19.379	26.329	19.297	39.345	25.515	P	P	4.40404	4.93487	4.27642	4.53844	4.71857	4.27028	5.2981	4.67329	4.74006	0.240464	0.518355	0.173653	0.272225	0.0853707	0.513785	0.253353	0.595105	0.615822	0.666677	0.379	0.281	0.098
ENSOCUG00000001430	ENSMUSG00000021037	MGI:2387603	Ahsa1	1421	2261	1529	4579	4160	3164	3369	26.367	36.826	22.55	79.107	76.744	71.585	67.105	P	P	4.72065	5.20263	4.49504	4.80611	6.30574	6.26198	6.16159	6.06834	6.19941	0.40621	0.658531	0.288103	0.933791	0.915554	0.873707	0.83484	-2.78175	0.207796	0.276713	0.5325	0.88975	-0.35725
ENSOCUG00000017817	ENSMUSG00000020288	MGI:1916133	Ahsa2	579	1033	769	559	527	414	461	10.743	16.825	11.341	9.657	9.722	9.367	9.182	P	P	3.42538	4.07251	3.50351	3.66713	3.27162	3.28128	3.22754	3.19886	3.24483	-0.27187	0.0669081	-0.230969	-0.330892	-0.326869	-0.349266	-0.361222	1.41143	0.39168	0.457203	-0.1025	-0.342	0.2395
ENSOCUG00000013398	ENSMUSG00000062753	MGI:2146839	AI413582	294	553	443	753	809	542	601	5.455	9.007	6.533	13.009	14.925	12.263	11.971	P	P	2.44763	3.17102	2.70783	2.77549	3.70143	3.89961	3.6162	3.58146	3.69967	-0.783725	-0.405025	-0.647509	-0.151741	-0.069133	-0.187264	-0.201747	-2.30425	0.251139	0.321298	-0.5945	-0.1525	-0.442
ENSOCUG00000004768	ENSMUSG00000046312	MGI:2140300	AI464131	264	432	356	197	183	156	152	4.899	7.036	5.25	3.403	3.376	3.529	3.028	P	A	2.29235	2.81478	2.3924	2.49984	1.76697	1.75532	1.81946	1.59816	1.73498	-0.865013	-0.591522	-0.812637	-0.958063	-0.962922	-0.936186	-1.02843	1.75996	0.321277	0.38927	-0.7285	-0.97125	0.24275
ENSOCUG00000007963	ENSMUSG00000010290	MGI:2138299	AI597479	812	1032	734	636	575	394	675	15.067	16.808	10.825	10.988	10.608	8.914	13.445	P	P	3.91329	4.07112	3.4363	3.8069	3.4578	3.40703	3.15611	3.74898	3.44248	-0.0164439	0.0661766	-0.26615	-0.253289	-0.27445	-0.379042	-0.13192	4.3657	0.0151892	0.0431626	0.025	-0.2595	0.2845
ENSOCUG00000010947	ENSMUSG00000047423	MGI:2147598	AI837181	358	453	395	704	991	696	348	6.643	7.378	5.825	12.162	18.282	15.747	6.932	P	P	2.73177	2.88326	2.54238	2.71914	3.60435	4.19236	3.977	2.79318	3.64172	-0.634974	-0.555673	-0.734125	-0.192204	0.0528895	-0.0368768	-0.530318	-3.12264	0.0424743	0.0889851	-0.5955	-0.1765	-0.419
ENSOCUG00000017030	ENSMUSG00000042901	MGI:1919737	Aida	1596	2495	1871	4016	2897	3219	4408	29.614	40.637	27.594	69.381	53.444	72.83	87.8	P	P	4.8882	5.34471	4.78626	5.00639	6.11646	5.73996	6.18645	6.45614	6.12476	0.493925	0.73291	0.440558	0.854898	0.697963	0.884071	0.996485	-1.82134	0.244104	0.314324	0.6135	0.85825	-0.24475
ENSOCUG00000023521	ENSMUSG00000024397	MGI:1343098	Aif1	477	929	582	15662	8470	5731	6269	8.851	15.131	8.583	270.578	156.255	129.663	124.868	P	P	3.1458	3.91942	3.10154	3.38892	8.0799	7.28776	7.01863	6.96426	7.33764	-0.418228	-0.013235	-0.441399	1.6733	1.34312	1.23094	1.20828	-6.89229	0.0355247	0.0785695	-0.2155	1.36375	-1.57925
ENSOCUG00000024109	ENSMUSG00000001864	MGI:1919598	Aif1l	88	84	87	275	587	184	332	1.633	1.368	1.283	4.751	10.829	4.163	6.613	A	P	0.707389	0.452206	0.359611	0.506402	2.24821	3.43683	2.05762	2.72528	2.61698	-1.69475	-1.82834	-1.87681	-0.757474	-0.262029	-0.836916	-0.558622	-8.02508	0.00134999	0.00861074	-1.7615	-0.60375	-1.15775
ENSOCUG00000002920	ENSMUSG00000036932	MGI:1349419	Aifm1	569	647	603	958	833	677	680	10.558	10.538	8.893	16.55	15.367	15.317	13.544	P	P	3.40024	3.39751	3.15268	3.31681	4.0488	3.94179	3.93707	3.75963	3.92182	-0.285028	-0.286458	-0.414627	-0.00694763	-0.0515529	-0.0535211	-0.127482	-9.08013	0.00281286	0.0134517	-0.2855	-0.06	-0.2255
ENSOCUG00000004543	ENSMUSG00000020085	MGI:1918611	Aifm2	921	715	968	543	769	496	365	17.089	11.645	14.276	9.381	14.187	11.222	7.27	P	P	4.09502	3.54169	3.83553	3.82408	3.22973	3.82646	3.48825	2.86199	3.35161	0.078688	-0.210981	-0.0571531	-0.348355	-0.0996261	-0.240597	-0.501637	1.3791	0.318768	0.38705	-0.066	-0.29775	0.23175
ENSOCUG00000003607	ENSMUSG00000019806	MGI:1913503	Aig1	961	1339	1146	2532	2440	2319	2129	17.831	21.809	16.901	43.743	45.013	52.467	42.406	P	P	4.15635	4.44683	4.07906	4.22741	5.45098	5.49228	5.71334	5.4062	5.5157	0.110797	0.262864	0.0703348	0.577511	0.594726	0.686868	0.558844	-5.14928	0.0816595	0.140201	0.187	0.60475	-0.41775
ENSOCUG00000002043	ENSMUSG00000028029	MGI:102774	Aimp1	796	1140	784	4428	3963	3646	3214	14.77	18.567	11.562	76.498	73.11	82.49	64.017	P	P	3.88458	4.21471	3.53138	3.87689	6.25736	6.19199	6.36615	6.00039	6.20397	-0.0314744	0.141347	-0.216379	0.913626	0.886381	0.958974	0.806516	-9.1186	0.0399018	0.0851338	0.055	0.8915	-0.8365
ENSOCUG00000012599	ENSMUSG00000029610	MGI:2385237	Aimp2	132	190	169	2287	2048	1918	1592	2.449	3.095	2.492	39.51	37.782	43.395	31.71	A	P	1.29235	1.62974	1.31755	1.41321	5.30416	5.23962	5.43944	4.98686	5.24252	-1.38852	-1.21189	-1.37533	0.516313	0.489409	0.572701	0.384056	-18.4737	0.0115156	0.0356161	-1.3005	0.4905	-1.791
ENSOCUG00000001058	ENSMUSG00000022178	MGI:1341886	Ajuba	304	376	414	270	312	250	240	5.641	6.124	6.106	4.665	5.756	5.656	4.78	P	P	2.49589	2.61448	2.61015	2.57351	2.22174	2.52502	2.49984	2.25713	2.37593	-0.758463	-0.696379	-0.698643	-0.768508	-0.642093	-0.652588	-0.753756	-0.495925	0.652044	0.69943	-0.727	-0.7045	-0.0225
ENSOCUG00000005171	ENSMUSG00000026817	MGI:87977	Ak1	1389	2349	1349	256	328	196	194	25.773	38.259	19.895	4.423	6.051	4.434	3.864	P	A	4.68779	5.25772	4.31434	4.75328	2.14492	2.59717	2.14876	1.95015	2.21025	0.389007	0.687368	0.193507	-0.800526	-0.61202	-0.798924	-0.881711	8.21732	0.0439412	0.0909589	0.538	-0.7735	1.3115
ENSOCUG00000001832	ENSMUSG00000028792	MGI:87978	Ak2	928	1153	1057	1356	963	839	1102	17.219	18.779	15.589	23.426	17.766	18.982	21.95	P	P	4.10594	4.23107	3.96243	4.09981	4.55006	4.15101	4.24658	4.45614	4.35095	0.0844066	0.149911	0.00927765	0.201988	0.0356542	0.0754914	0.162842	-0.0395298	0.970655	0.976074	0.117	0.119	-0.002
ENSOCUG00000011411	ENSMUSG00000024782	MGI:1860835	Ak3	2121	2334	2141	7311	6484	6242	9130	39.355	38.014	31.576	126.305	119.618	141.225	181.854	P	P	5.29849	5.24848	4.98074	5.1759	6.98077	6.90228	7.14185	7.50664	7.13289	0.70871	0.68253	0.542367	1.21516	1.18245	1.2823	1.43435	-10.1402	0.00133375	0.00857126	0.696	1.27825	-0.58225
ENSOCUG00000017563	ENSMUSG00000018428	MGI:104729	Akap1	1426	1122	1380	3779	3744	2795	3679	26.46	18.274	20.352	65.286	69.07	63.237	73.279	P	P	4.72572	4.19175	4.34712	4.42153	6.02871	6.10998	5.98269	6.19533	6.07918	0.408862	0.129327	0.210666	0.81832	0.852196	0.799137	0.887773	-4.03387	0.147359	0.21368	0.269	0.83925	-0.57025
ENSOCUG00000013402	ENSMUSG00000047804	MGI:1890218	Akap10	1056	1568	1452	893	542	501	638	19.594	25.538	21.414	15.428	9.999	11.335	12.708	P	P	4.29235	4.6746	4.42049	4.46248	3.94744	3.32177	3.50272	3.66765	3.60989	0.181995	0.382102	0.249077	-0.0491989	-0.309992	-0.234565	-0.16582	4.12806	0.07359	0.130289	0.282	-0.19	0.472
ENSOCUG00000016016	ENSMUSG00000022016	MGI:2684060	Akap11	3943	7112	4054	3632	3565	3512	3856	73.163	115.835	59.789	62.747	65.767	79.459	76.805	P	P	6.19304	6.85593	5.9018	6.31692	5.97147	6.0393	6.31213	6.26313	6.14651	1.17701	1.52404	1.02455	0.794461	0.822736	0.936457	0.91603	2.7313	0.208112	0.277075	1.3505	0.86725	0.48325
ENSOCUG00000002673	ENSMUSG00000038587	MGI:1932576	Akap12	6423	13576	5265	9467	7704	5916	7552	119.179	221.116	77.648	163.553	142.124	133.849	150.423	P	P	6.89699	7.78866	6.27889	6.98818	7.35361	7.15101	7.06446	7.23288	7.20049	1.54553	2.01233	1.22195	1.37057	1.28612	1.25004	1.32024	2.01456	0.28865	0.357668	1.779	1.30675	0.47225
ENSOCUG00000011649	ENSMUSG00000066406	MGI:2676556	Akap13	12810	15431	15603	3429	2041	1539	1928	237.691	251.329	230.114	59.24	37.653	34.82	38.402	P	P	7.89294	7.97343	7.8462	7.90419	5.88849	5.23468	5.12183	5.26313	5.37703	2.06692	2.10905	2.04245	0.759875	0.48735	0.440315	0.499209	20.4757	9.94333e-05	0.0023923	2.088	0.5465	1.5415
ENSOCUG00000022039	ENSMUSG00000059708	MGI:2443758	Akap17b	408	727	430	123	48	58	126	7.57	11.841	6.342	2.125	0.886	1.312	2.51	P	A	2.92038	3.5657	2.66486	3.05031	1.08743	-0.175421	0.392036	1.32752	0.657891	-0.536237	-0.198411	-0.670004	-1.24131	-1.76769	-1.53117	-1.14124	4.76605	0.0261288	0.0634752	-0.367	-1.42025	1.05325
ENSOCUG00000011733	ENSMUSG00000021057	MGI:2685104	Akap5	314	301	288	148	166	138	170	5.826	4.902	4.247	2.557	3.062	3.122	3.386	P	A	2.54258	2.29351	2.08659	2.30756	1.35437	1.61466	1.64258	1.75963	1.59281	-0.734019	-0.864408	-0.972729	-1.13004	-1.02155	-1.00991	-0.961125	3.12675	0.11346	0.176779	-0.799	-1.03075	0.23175
ENSOCUG00000014205	ENSMUSG00000061603	MGI:3050566	Akap6	1879	8102	1857	1146	910	608	906	34.865	131.959	27.387	19.798	16.788	13.756	18.046	P	P	5.12371	7.04395	4.77543	5.64769	4.30731	4.06934	3.78198	4.1736	4.08306	0.617212	1.62247	0.434886	0.100805	0.00161274	-0.118164	0.0450725	2.20353	0.267866	0.337548	1.1195	0.0075	1.112
ENSOCUG00000013991	ENSMUSG00000039166	MGI:1859150	Akap7	696	1789	698	138	68	89	107	12.914	29.138	10.294	2.384	1.254	2.014	2.131	P	A	3.6909	4.86483	3.36375	3.97316	1.25344	0.327079	1.00979	1.0917	0.920504	-0.132867	0.481687	-0.304132	-1.17211	-1.55824	-1.27367	-1.23953	4.6562	0.109375	0.172123	0.1745	-1.311	1.4855
ENSOCUG00000004051	ENSMUSG00000024045	MGI:1928488	Akap8	1680	2268	2153	1822	2030	1407	1155	31.173	36.94	31.753	31.477	37.45	31.833	23.006	P	P	4.9622	5.20709	4.9888	5.0527	4.97623	5.22688	4.99246	4.52391	4.92987	0.532664	0.660865	0.546588	0.379623	0.484101	0.38639	0.191089	2.67262	0.0792312	0.137254	0.597	0.36025	0.23675
ENSOCUG00000011417	ENSMUSG00000002625	MGI:1860606	Akap8l	938	1157	1216	1323	1681	970	1126	17.405	18.844	17.934	22.856	31.011	21.946	22.428	P	P	4.1214	4.23606	4.16459	4.17402	4.51452	4.95472	4.4559	4.48723	4.60309	0.0925016	0.152526	0.115113	0.187173	0.370659	0.162738	0.175798	-1.75804	0.153741	0.220404	0.123	0.22425	-0.10125
ENSOCUG00000004524	ENSMUSG00000040407	MGI:2178217	Akap9	4931	6737	6276	4154	3487	3008	2957	91.495	109.727	92.559	71.765	64.329	68.056	58.898	P	P	6.51562	6.77778	6.5323	6.60857	6.16521	6.00739	6.08864	5.88016	6.03535	1.34589	1.48313	1.35461	0.875215	0.809433	0.843302	0.7564	8.12545	0.0461775	0.0940324	1.4145	0.82075	0.59375
ENSOCUG00000027825	ENSMUSG00000031023	MGI:3041226	Akip1	150	203	122	582	438	388	297	2.783	3.306	1.799	10.055	8.08	8.778	5.916	A	P	1.47678	1.72522	0.847405	1.3498	3.3298	3.0144	3.13397	2.56456	3.01068	-1.29197	-1.16191	-1.62145	-0.306645	-0.438107	-0.38827	-0.625613	-8.38843	0.00305523	0.0142192	-1.227	-0.43975	-0.78725
ENSOCUG00000005500	ENSMUSG00000023075	MGI:1915300	Akirin1	1113	1940	1482	1405	758	931	1358	20.652	31.597	21.857	24.273	13.984	21.064	27.049	P	P	4.3682	4.98173	4.45	4.59997	4.60127	3.80567	4.39669	4.7575	4.39029	0.221699	0.542887	0.264523	0.223335	-0.10829	0.138061	0.288455	1.35537	0.333353	0.401452	0.3825	0.13525	0.24725
ENSOCUG00000004886	ENSMUSG00000028291	MGI:1889364	Akirin2	787	1178	846	1750	1404	1393	2463	14.603	19.186	12.477	30.233	25.901	31.516	49.059	P	P	3.86818	4.26201	3.64118	3.92379	4.91806	4.69494	4.97803	5.61644	5.05187	-0.0400624	0.166112	-0.158896	0.355377	0.262378	0.380376	0.646476	-2.63609	0.0998041	0.161637	0.063	0.41075	-0.34775
ENSOCUG00000004630	ENSMUSG00000039158	MGI:2140340	Akna	923	1570	1403	2958	2113	1445	1450	17.126	25.571	20.692	51.103	38.981	32.693	28.881	P	P	4.09814	4.67644	4.37097	4.38185	5.67533	5.28469	5.03091	4.85207	5.21075	0.0803263	0.383065	0.22315	0.671023	0.508198	0.402416	0.327873	-1.45602	0.318701	0.387027	0.2315	0.47725	-0.24575
ENSOCUG00000005945	ENSMUSG00000028692	MGI:1929955	Akr1a1	6155	9248	8145	5970	3916	4052	4665	114.206	150.625	120.123	103.138	72.243	91.676	92.919	P	P	6.8355	7.23481	6.90837	6.99289	6.68844	6.17478	6.51847	6.5379	6.4799	1.51334	1.72239	1.55149	1.09331	0.879206	1.02246	1.03056	5.36753	0.0675709	0.122784	1.6175	1.00625	0.61125
ENSOCUG00000016605	ENSMUSG00000001642	MGI:1353494	Akr1b3	1225	2321	1416	5816	6170	3895	3811	22.73	37.803	20.883	100.478	113.825	88.124	75.909	P	P	4.50652	5.24042	4.38427	4.71041	6.65073	6.83067	6.46146	6.24619	6.54726	0.294114	0.678312	0.230116	1.07759	1.1526	0.998701	0.908971	-2.75725	0.194088	0.263195	0.486	1.03475	-0.54875
ENSOCUG00000026383	ENSMUSG00000029762	MGI:107673	Akr1b8	499	514	675	4156	3915	2697	4021	9.259	8.372	9.955	71.799	72.224	61.019	80.091	P	P	3.21085	3.06551	3.31541	3.19726	6.1659	6.17441	5.93119	6.32358	6.14877	-0.384174	-0.46026	-0.329438	0.875504	0.879053	0.777674	0.941227	-25.4145	0.000310142	0.00409339	-0.422	0.8685	-1.2905
ENSOCUG00000008501	ENSMUSG00000045410	MGI:1914758	Akr1e1	474	622	463	0	0	0	0	8.795	10.131	6.828	0	0	0	0	P	A	3.1367	3.34066	2.77154	3.08297	-5.85508	-5.76038	-5.46595	-5.64976	-5.68279	-0.422993	-0.31622	-0.614159	-4.1351	-4.09563	-3.9729	-4.04952	57.8744	0.000403583	0.00461729	-0.3695	-4.0635	3.694
ENSOCUG00000000153	ENSMUSG00000028743	MGI:107796	Akr7a5	290	367	319	893	834	662	530	5.381	5.977	4.705	15.428	15.386	14.978	10.557	P	P	2.42787	2.57952	2.23408	2.41382	3.94744	3.94352	3.90474	3.40009	3.79895	-0.794071	-0.714677	-0.895519	-0.0491989	-0.0508314	-0.0669947	-0.277347	-9.44869	0.000842362	0.00662167	-0.7545	-0.111	-0.6435
ENSOCUG00000015901	ENSMUSG00000019699	MGI:1345147	Akt3	3069	4674	3068	2569	1719	1500	2643	56.946	76.127	45.247	44.382	31.712	33.937	52.644	P	P	5.83151	6.25033	5.49975	5.86053	5.47191	4.98697	5.0848	5.7182	5.31547	0.98775	1.207	0.814072	0.586235	0.384101	0.424879	0.688892	4.41812	0.0519938	0.101718	1.0975	0.521	0.5765
ENSOCUG00000002885	ENSMUSG00000031667	MGI:3693832	Aktip	1016	1628	913	1701	1652	1096	1673	18.852	26.516	13.465	29.387	30.476	24.797	33.323	P	P	4.23664	4.72877	3.75114	4.23885	4.87709	4.92961	4.63209	5.05846	4.87431	0.15283	0.410463	-0.101333	0.3383	0.360194	0.236178	0.413899	-0.41482	0.741365	0.778333	0.2815	0.337	-0.0555
ENSOCUG00000005846	ENSMUSG00000028393	MGI:96853	Alad	199	206	239	928	895	561	563	3.692	3.355	3.525	16.032	16.511	12.693	11.214	A	P	1.88458	1.74639	1.81753	1.81617	4.0029	4.04536	3.66591	3.48723	3.80035	-1.07848	-1.15083	-1.11358	-0.0260801	-0.00838216	-0.166544	-0.241024	-14.9867	0.000124611	0.0026309	-1.1145	-0.1105	-1.004
ENSOCUG00000008551	ENSMUSG00000032786	MGI:87989	Alas1	1593	2002	2166	3622	2491	2049	2533	29.558	32.607	31.944	62.574	45.954	46.358	50.453	P	P	4.88549	5.02711	4.99748	4.97003	5.96749	5.52213	5.53476	5.65687	5.67031	0.492504	0.566646	0.551135	0.792803	0.607165	0.612431	0.663329	-2.43594	0.0815762	0.140201	0.53	0.66875	-0.13875
ENSOCUG00000013603	ENSMUSG00000025270	MGI:87990	Alas2	384	367	2066	288	118	100	416	7.125	5.977	30.469	4.976	2.177	2.262	8.286	P	A	2.83292	2.57952	4.92929	3.44725	2.31484	1.12226	1.17791	3.05068	1.91642	-0.582024	-0.714677	0.515435	-0.729698	-1.22679	-1.2036	-0.422988	1.20199	0.302549	0.371203	-0.6485	-0.896	0.2475
ENSOCUG00000016287	ENSMUSG00000029368	MGI:87991	Alb	170	10	6	6561	2580	2741	4871	3.154	0.163	0.088	113.348	47.596	62.015	97.022	A	P	1.65735	-2.61818	-3.49837	-1.4864	6.82462	5.57277	5.95454	6.60024	6.23804	-1.19744	-3.4357	-3.89648	1.15007	0.628276	0.787406	1.05655	-2.86159	0.209442	0.278425	-2.3165	0.9055	-3.222
ENSOCUG00000011289	ENSMUSG00000022636	MGI:1313266	Alcam	4643	6762	4801	6780	5238	5092	7136	86.151	110.135	70.805	117.132	96.631	115.206	142.137	P	P	6.4288	6.78312	6.14579	6.45257	6.87199	6.59442	6.84807	7.15114	6.8664	1.30043	1.48592	1.15228	1.16982	1.05412	1.15985	1.28617	2.1601	0.198815	0.267961	1.393	1.1675	0.2255
ENSOCUG00000026756	ENSMUSG00000007833	MGI:1916998	Aldh16a1	533	664	737	1028	1172	992	381	9.89	10.815	10.869	17.76	21.621	22.444	7.589	P	P	3.30595	3.43493	3.44219	3.39436	4.15054	4.43437	4.48825	2.92388	3.99926	-0.334391	-0.26687	-0.263069	0.0354609	0.153767	0.176224	-0.475838	-1.74587	0.171463	0.239526	-0.3005	-0.02775	-0.27275
ENSOCUG00000005956	ENSMUSG00000025007	MGI:1888908	Aldh18a1	1260	1251	1256	3938	3780	3251	3714	23.379	20.375	18.524	68.033	69.734	73.554	73.976	P	P	4.54717	4.34875	4.21129	4.36907	6.08817	6.12379	6.20072	6.20899	6.15542	0.315391	0.211522	0.139557	0.843104	0.857951	0.890019	0.893467	-11.4764	0.0428882	0.0895992	0.2635	0.871	-0.6075
ENSOCUG00000009444	ENSMUSG00000053279	MGI:1353450	Aldh1a1	756	574	870	14592	12698	9980	11722	14.028	9.349	12.831	252.093	234.254	225.796	233.482	P	P	3.8102	3.2248	3.68154	3.57218	7.97781	7.87193	7.81888	7.86717	7.88395	-0.0704138	-0.376875	-0.137768	1.63075	1.58661	1.5645	1.58463	-11.7791	0.0519349	0.101644	-0.2235	1.592	-1.8155
ENSOCUG00000016942	ENSMUSG00000013584	MGI:107928	Aldh1a2	122	198	287	9040	10654	6105	8900	2.264	3.225	4.233	156.176	196.546	138.125	177.273	A	P	1.1787	1.68925	2.08157	1.64984	7.28703	7.61872	7.10983	7.46983	7.37135	-1.44802	-1.18074	-0.975356	1.34281	1.48107	1.26895	1.41901	-19.0682	0.0172638	0.0474497	-1.3145	1.378	-2.6925
ENSOCUG00000007938	ENSMUSG00000015134	MGI:1861722	Aldh1a3	340	264	401	314	430	542	276	6.309	4.3	5.914	5.425	7.933	12.263	5.497	P	P	2.65735	2.10428	2.56413	2.44192	2.43954	2.98781	3.6162	2.45876	2.87558	-0.673936	-0.963468	-0.722739	-0.677722	-0.449192	-0.187264	-0.669711	-1.74122	0.203682	0.273045	-0.8185	-0.496	-0.3225
ENSOCUG00000015071	ENSMUSG00000030088	MGI:1340024	Aldh1l1	471	442	487	34	180	84	102	8.739	7.199	7.182	0.587	3.321	1.9	2.032	P	A	3.12754	2.84779	2.84445	2.93993	-0.767617	1.73147	0.926372	1.02266	0.728222	-0.427789	-0.574239	-0.57599	-2.01453	-0.972861	-1.30844	-1.26831	3.82386	0.0231419	0.0582108	-0.501	-1.391	0.89
ENSOCUG00000006962	ENSMUSG00000020256	MGI:2444680	Aldh1l2	356	369	348	1012	951	902	813	6.606	6.01	5.132	17.483	17.544	20.408	16.194	P	P	2.72369	2.58737	2.35961	2.55689	4.12791	4.13292	4.35104	4.01735	4.1573	-0.639206	-0.710573	-0.829803	0.0260278	0.0281137	0.119031	-0.0200582	-15.406	0.00188169	0.0103877	-0.675	0.03825	-0.71325
ENSOCUG00000008325	ENSMUSG00000029455	MGI:99600	Aldh2	5149	4433	5547	8986	7232	4601	3208	95.54	72.201	81.807	155.243	133.417	104.097	63.898	P	P	6.57803	6.17396	6.35416	6.36872	7.27838	7.0598	6.70179	5.99769	6.75942	1.37856	1.16702	1.26136	1.33921	1.2481	1.09887	0.805393	0.95215	0.405609	0.470639	1.273	1.12275	0.15025
ENSOCUG00000011906	ENSMUSG00000010025	MGI:1353452	Aldh3a2	1296	1792	1418	1900	1491	1169	1523	24.047	29.187	20.913	32.825	27.506	26.449	30.336	P	P	4.58781	4.86724	4.38631	4.61379	5.0367	4.78168	4.72511	4.92294	4.86661	0.336667	0.482953	0.231182	0.404831	0.298532	0.274954	0.357411	0.966345	0.476028	0.535112	0.41	0.334	0.076
ENSOCUG00000015315	ENSMUSG00000028737	MGI:2443883	Aldh4a1	308	337	370	2400	2024	1312	1229	5.715	5.489	5.457	41.463	37.339	29.684	24.48	P	P	2.51474	2.45649	2.44805	2.4731	5.37374	5.22261	4.89161	4.61351	5.02537	-0.74859	-0.779085	-0.783505	0.545314	0.482321	0.344352	0.228433	-16.0398	0.000329078	0.00421177	-0.764	0.39975	-1.16375
ENSOCUG00000003063	ENSMUSG00000035936	MGI:2441982	Aldh5a1	232	387	217	545	576	564	736	4.305	6.303	3.2	9.415	10.626	12.76	14.66	A	P	2.10594	2.65608	1.67822	2.14675	3.23503	3.40954	3.67361	3.8738	3.54799	-0.962601	-0.674601	-1.18651	-0.346144	-0.273405	-0.163337	-0.0798928	-3.88021	0.10899	0.17168	-0.819	-0.2155	-0.6035
ENSOCUG00000025121	ENSMUSG00000021238	MGI:1915077	Aldh6a1	1688	1309	1412	3609	4627	3235	4757	31.321	21.32	20.824	62.349	85.359	73.192	94.751	P	P	4.96906	4.41414	4.38019	4.5878	5.9623	6.41548	6.1936	6.56607	6.28436	0.536252	0.24575	0.227979	0.790641	0.979534	0.887052	1.0423	-3.44448	0.132774	0.198416	0.391	0.925	-0.534
ENSOCUG00000010185	ENSMUSG00000053644	MGI:108186	Aldh7a1	1385	1492	1295	2514	2723	1786	2118	25.699	24.301	19.099	43.432	50.234	40.408	42.187	P	P	4.68363	4.60292	4.2554	4.51398	5.44069	5.6506	5.33657	5.39872	5.45665	0.386829	0.344578	0.162652	0.573221	0.660715	0.529822	0.555729	-6.05728	0.00447587	0.0185027	0.366	0.58	-0.214
ENSOCUG00000010380	ENSMUSG00000026687	MGI:1861622	Aldh9a1	785	1088	845	5021	3736	2965	3316	14.566	17.721	12.462	86.743	68.922	67.083	66.049	P	P	3.86451	4.14735	3.63947	3.88378	6.43868	6.1069	6.06787	6.04546	6.16473	-0.0419841	0.106086	-0.159789	0.989204	0.85091	0.834644	0.825304	-10.1129	0.0203641	0.0531192	0.032	0.875	-0.843
ENSOCUG00000006329	ENSMUSG00000030695	MGI:87994	Aldoa	10596	19186	11928	48735	37415	27803	37469	196.61	312.488	175.915	841.95	690.236	629.04	746.318	P	P	7.61919	8.28765	7.45873	7.78853	9.71759	9.43095	9.29701	9.54365	9.4973	1.92361	2.27355	1.83961	2.35592	2.23645	2.18062	2.28342	-0.92238	0.515127	0.573169	2.099	2.264	-0.165
ENSOCUG00000014944	ENSMUSG00000028307	MGI:87995	Aldob	31	8	12	329	322	268	363	0.575	0.13	0.177	5.684	5.94	6.063	7.23	A	P	-0.797846	-2.94011	-2.49837	-2.07878	2.50686	2.57053	2.60014	2.85406	2.6329	-2.48274	-3.60423	-3.37298	-0.64966	-0.623122	-0.610779	-0.504941	-4.35739	0.142403	0.208544	-3.0435	-0.59725	-2.44625
ENSOCUG00000013802	ENSMUSG00000017390	MGI:101863	Aldoc	122	1363	104	436	204	164	262	2.264	22.2	1.534	7.532	3.763	3.71	5.219	P	P	1.1787	4.47246	0.617107	2.08942	2.9131	1.91204	1.89161	2.38366	2.2751	-1.44802	0.276281	-1.74201	-0.480331	-0.897595	-0.906113	-0.701015	0.184651	0.883137	0.903479	-0.586	-0.74625	0.16025
ENSOCUG00000012524	ENSMUSG00000039427	MGI:2384774	Alg1	505	609	591	304	247	150	136	9.37	9.919	8.716	5.252	4.557	3.394	2.709	P	A	3.2281	3.31019	3.12368	3.22066	2.39285	2.18798	1.76287	1.4377	1.94535	-0.375147	-0.332173	-0.429809	-0.697185	-0.782577	-0.959771	-1.09531	5.77938	0.00771345	0.0266627	-0.3535	-0.88375	0.53025
ENSOCUG00000015824	ENSMUSG00000075470	MGI:2146159	Alg10b	1553	2292	1685	233	172	163	147	28.816	37.33	24.85	4.025	3.173	3.688	2.928	P	A	4.8488	5.22228	4.6352	4.90209	2.00911	1.66588	1.88278	1.54991	1.77692	0.473297	0.668816	0.361477	-0.857136	-1.0002	-0.909791	-1.04854	14.2344	0.0170604	0.0470304	0.571	-0.954	1.525
ENSOCUG00000024835	ENSMUSG00000063362	MGI:2142632	Alg11	682	1031	724	239	153	127	179	12.655	16.792	10.678	4.129	2.823	2.873	3.565	P	A	3.66159	4.06972	3.41651	3.71594	2.04579	1.497	1.52274	1.83405	1.7249	-0.148214	0.0654444	-0.27651	-0.841847	-1.07059	-1.05986	-0.930103	7.79762	0.0308225	0.071101	-0.0415	-0.97575	0.93425
ENSOCUG00000014081	ENSMUSG00000035845	MGI:2385025	Alg12	302	354	320	881	770	501	350	5.604	5.766	4.719	15.22	14.205	11.335	6.971	P	P	2.48636	2.52749	2.2386	2.41748	3.92792	3.82833	3.50272	2.80145	3.5151	-0.763448	-0.741916	-0.893155	-0.0573345	-0.0988446	-0.234565	-0.526872	-4.9011	0.0155426	0.043821	-0.7525	-0.2295	-0.523
ENSOCUG00000006326	ENSMUSG00000039887	MGI:1914039	Alg14	348	516	450	454	358	337	462	6.457	8.404	6.637	7.843	6.604	7.625	9.202	P	P	2.6909	3.07112	2.73045	2.83082	2.97147	2.72343	2.93066	3.20199	2.95689	-0.656371	-0.457327	-0.635668	-0.456003	-0.55939	-0.473013	-0.359919	-0.878759	0.507799	0.565986	-0.5565	-0.462	-0.0945
ENSOCUG00000005676	ENSMUSG00000039740	MGI:1914731	Alg2	691	2242	845	630	569	488	547	12.822	36.516	12.462	10.884	10.497	11.041	10.895	P	P	3.6805	5.19046	3.63947	4.17014	3.44413	3.3919	3.46479	3.44563	3.43661	-0.138312	0.652157	-0.159789	-0.258989	-0.280758	-0.250375	-0.258361	1.31374	0.414108	0.478274	0.257	-0.262	0.519
ENSOCUG00000026514	ENSMUSG00000033809	MGI:1098592	Alg3	129	193	124	1385	1242	1003	1354	2.394	3.143	1.829	23.927	22.913	22.693	26.969	A	P	1.25918	1.65235	0.870864	1.2608	4.58059	4.51807	4.50416	4.75325	4.58902	-1.40588	-1.20006	-1.60917	0.214713	0.188652	0.182856	0.286681	-14.3906	0.0338317	0.0759302	-1.303	0.2185	-1.5215
ENSOCUG00000007458	ENSMUSG00000036632	MGI:1913498	Alg5	568	713	598	1782	1456	1596	1801	10.539	11.613	8.819	30.786	26.86	36.109	35.873	P	P	3.3977	3.53765	3.14067	3.35867	4.9442	4.74741	5.1743	5.16482	5.00768	-0.286357	-0.213097	-0.420916	0.366274	0.284248	0.462184	0.458232	-11.4719	0.000736032	0.00627465	-0.2495	0.3925	-0.642
ENSOCUG00000011266	ENSMUSG00000035704	MGI:2141959	Alg8	132	183	155	777	545	516	792	2.449	2.981	2.286	13.424	10.054	11.674	15.775	A	P	1.29235	1.57559	1.19279	1.35358	3.74669	3.32973	3.54528	3.97959	3.65032	-1.38852	-1.24024	-1.44064	-0.132874	-0.306673	-0.216825	-0.0357953	-12.0936	0.00397358	0.0169745	-1.3145	-0.17325	-1.14125
ENSOCUG00000012966	ENSMUSG00000032059	MGI:1924753	Alg9	470	689	582	602	374	400	602	8.721	11.222	8.583	10.4	6.9	9.05	11.991	P	P	3.12447	3.48825	3.10154	3.23809	3.37854	2.78651	3.17791	3.58386	3.2317	-0.429394	-0.238957	-0.441399	-0.286327	-0.533098	-0.369953	-0.200747	0.11394	0.918868	0.934431	-0.334	-0.3475	0.0135
ENSOCUG00000001438	ENSMUSG00000079036	MGI:2384034	Alkbh1	534	672	581	402	272	236	257	9.908	10.945	8.569	6.945	5.018	5.339	5.119	P	P	3.30865	3.45221	3.09906	3.28664	2.79597	2.32708	2.4167	2.35586	2.4739	-0.332975	-0.257825	-0.442698	-0.529154	-0.724598	-0.687243	-0.712602	6.23893	0.0049591	0.0197937	-0.2955	-0.6635	0.368
ENSOCUG00000016359	ENSMUSG00000040174	MGI:1916363	Alkbh3	449	438	499	177	153	138	297	8.331	7.134	7.359	3.058	2.823	3.122	5.916	P	A	3.05853	2.83468	2.87956	2.92426	1.61253	1.497	1.64258	2.56456	1.82917	-0.463916	-0.581105	-0.557606	-1.02244	-1.07059	-1.00991	-0.625613	3.46088	0.0258046	0.0628761	-0.5225	-0.93225	0.40975
ENSOCUG00000009240	ENSMUSG00000042650	MGI:2144489	Alkbh5	2704	3295	3171	1290	1141	854	932	50.173	53.667	46.766	22.286	21.049	19.322	18.564	P	P	5.64884	5.74595	5.54739	5.64739	4.47808	4.3957	4.27215	4.21442	4.34009	0.89212	0.94296	0.839012	0.171983	0.137647	0.0861475	0.0620867	22.5401	0.000225352	0.00345741	0.9175	0.1145	0.803
ENSOCUG00000017671	ENSMUSG00000042831	MGI:2142037	Alkbh6	155	263	194	587	700	381	495	2.876	4.284	2.861	10.141	12.914	8.62	9.86	A	P	1.52408	2.09881	1.51658	1.71316	3.34214	3.69083	3.1077	3.30152	3.36055	-1.26721	-0.966335	-1.27113	-0.301501	-0.156159	-0.399218	-0.31843	-5.18188	0.0873512	0.147358	-1.1165	-0.29375	-0.82275
ENSOCUG00000006905	ENSMUSG00000002661	MGI:1913650	Alkbh7	140	156	126	516	543	394	291	2.598	2.541	1.858	8.914	10.017	8.914	5.796	A	P	1.37724	1.34529	0.893947	1.20549	3.15615	3.32442	3.15611	2.53511	3.04295	-1.34408	-1.3608	-1.59708	-0.379025	-0.308884	-0.379042	-0.637886	-12.6914	0.000923455	0.00694698	-1.3525	-0.42625	-0.92625
ENSOCUG00000011931	ENSMUSG00000025899	MGI:1914917	Alkbh8	543	877	673	215	193	154	178	10.075	14.284	9.925	3.714	3.56	3.484	3.545	P	A	3.33277	3.83632	3.31113	3.49341	1.89311	1.83207	1.80084	1.82597	1.838	-0.320352	-0.0567391	-0.331679	-0.905485	-0.930927	-0.943946	-0.933472	5.61441	0.110846	0.173837	-0.1885	-0.92825	0.73975
ENSOCUG00000006224	ENSMUSG00000063810	MGI:1934606	Alms1	1051	1169	1219	609	452	319	547	19.501	19.04	17.978	10.521	8.339	7.217	10.895	P	P	4.2855	4.25095	4.16815	4.23487	3.39522	3.0598	2.85147	3.44563	3.18803	0.17841	0.160319	0.116974	-0.279375	-0.419187	-0.506022	-0.258361	8.96948	0.0024479	0.0123499	0.169	-0.3655	0.5345
ENSOCUG00000005428	ENSMUSG00000025701	MGI:87999	Alox5	216	137	263	1312	1006	983	793	4.008	2.231	3.879	22.666	18.559	22.24	15.795	A	P	2.00285	1.15792	1.95559	1.70545	4.50247	4.21403	4.4751	3.98141	4.29325	-1.01657	-1.45889	-1.04131	0.182152	0.0619234	0.170744	-0.0350365	-5.87663	0.0905219	0.15155	-1.238	0.095	-1.333
ENSOCUG00000008200	ENSMUSG00000060063	MGI:107505	Alox5ap	460	764	578	1301	1096	1014	1416	8.535	12.443	8.524	22.476	20.219	22.942	28.204	P	P	3.09345	3.63732	3.09159	3.27412	4.49033	4.33765	4.5199	4.81784	4.54143	-0.445636	-0.160919	-0.446607	0.177089	0.11345	0.189415	0.313605	-3.37719	0.152395	0.219153	-0.3035	0.19825	-0.50175
ENSOCUG00000024991	ENSMUSG00000028028	MGI:1918731	Alpk1	2075	2625	2420	694	625	449	489	38.502	42.754	35.69	11.99	11.53	10.159	9.74	P	P	5.26685	5.41799	5.15746	5.28077	3.58371	3.52733	3.34463	3.28393	3.4349	0.69215	0.771271	0.634882	-0.200807	-0.224309	-0.300463	-0.325764	20.0781	0.00145971	0.00895245	0.7315	-0.26275	0.99425
ENSOCUG00000005991	ENSMUSG00000038763	MGI:2151224	Alpk3	39	28	46	363	768	288	239	0.724	0.456	0.678	6.271	14.168	6.516	4.76	A	P	-0.46664	-1.13276	-0.559771	-0.719722	2.64875	3.82458	2.70398	2.2511	2.8571	-2.30936	-2.65807	-2.35811	-0.590521	-0.100409	-0.567498	-0.756267	-8.82794	0.00704073	0.0250862	-2.4835	-0.5035	-1.98
ENSOCUG00000004447	ENSMUSG00000028766	MGI:87983	Alpl	483	459	418	48	100	72	68	8.962	7.476	6.165	0.829	1.845	1.629	1.354	P	A	3.16384	2.90224	2.62403	2.8967	-0.270118	0.883473	0.70398	0.437699	0.438759	-0.408787	-0.545735	-0.69138	-1.80717	-1.32632	-1.40114	-1.51213	8.21204	0.00125723	0.00829277	-0.4775	-1.5115	1.034
ENSOCUG00000012488	ENSMUSG00000026024	MGI:1921268	Als2	822	1167	1019	937	857	608	719	15.252	19.007	15.028	16.188	15.81	13.756	14.321	P	P	3.93095	4.24848	3.90961	4.02968	4.01683	3.98277	3.78198	3.84008	3.90541	-0.00719952	0.159026	-0.0183745	-0.0202762	-0.034472	-0.118164	-0.0939455	1.65193	0.31978	0.387988	0.076	-0.0665	0.1425
ENSOCUG00000012839	ENSMUSG00000044037	MGI:2447532	Als2cl	589	880	988	229	457	167	127	10.929	14.333	14.571	3.956	8.431	3.778	2.53	P	A	3.45008	3.84125	3.86503	3.71879	1.98412	3.07567	1.91776	1.33892	2.07912	-0.258937	-0.05416	-0.0417077	-0.86755	-0.412571	-0.895212	-1.13648	3.6814	0.0220406	0.0563737	-0.1565	-0.828	0.6715
ENSOCUG00000004954	ENSMUSG00000022244	MGI:1098273	Amacr	137	242	204	404	480	469	452	2.542	3.942	3.009	6.98	8.855	10.611	9.003	A	P	1.34599	1.97875	1.58909	1.63794	2.80313	3.14651	3.4075	3.17042	3.13189	-1.36044	-1.02918	-1.23317	-0.52617	-0.383043	-0.274256	-0.373078	-4.64431	0.103493	0.16579	-1.1945	-0.389	-0.8055
ENSOCUG00000016117	ENSMUSG00000040506	MGI:2443564	Ambra1	1555	2092	1998	1202	899	629	846	28.853	34.073	29.467	20.766	16.585	14.231	16.851	P	P	4.85066	5.09056	4.88101	4.94074	4.37614	4.05179	3.83097	4.07475	4.08341	0.474269	0.599857	0.490159	0.129494	-0.00570057	-0.0977441	0.00386828	6.75903	0.0169265	0.0467473	0.537	0.00725	0.52975
ENSOCUG00000005680	ENSMUSG00000075232	MGI:88004	Amd1	629	983	753	2162	1662	1533	2112	11.671	16.01	11.105	37.351	30.661	34.684	42.067	P	P	3.54487	4.00094	3.47317	3.67299	5.22307	4.93832	5.1162	5.39463	5.16805	-0.209313	0.0294373	-0.246849	0.482513	0.363823	0.437966	0.554023	-4.38055	0.106879	0.169478	-0.09	0.45975	-0.54975
ENSOCUG00000021194	ENSMUSG00000036820	MGI:2443978	Amdhd2	503	732	748	3949	3472	2611	1407	9.333	11.922	11.032	68.223	64.052	59.074	28.025	P	P	3.22237	3.57559	3.46356	3.42051	6.09219	6.00117	5.88444	4.80864	5.69661	-0.378144	-0.193234	-0.25188	0.844781	0.80684	0.758186	0.30977	-6.22134	0.00410358	0.0173621	-0.2855	0.68	-0.9655
ENSOCUG00000017212	ENSMUSG00000031751	MGI:1345634	Amfr	4063	5861	4441	3450	2723	2151	2677	75.389	95.46	65.496	59.602	50.234	48.666	53.321	P	P	6.23629	6.57682	6.03334	6.28215	5.8973	5.6506	5.60485	5.73664	5.72235	1.19965	1.37792	1.09341	0.763546	0.660715	0.641645	0.696579	6.43228	0.0723799	0.12878	1.289	0.691	0.598
ENSOCUG00000005548	ENSMUSG00000050947	MGI:2653612	Amigo1	586	1535	664	99	60	62	77	10.873	25.001	9.793	1.71	1.107	1.403	1.534	P	A	3.44271	4.64391	3.29171	3.79278	0.774277	0.146507	0.488251	0.617023	0.506514	-0.262794	0.366037	-0.341847	-1.37184	-1.63351	-1.49106	-1.43739	4.80583	0.119594	0.183484	0.0515	-1.4835	1.535
ENSOCUG00000009258	ENSMUSG00000048218	MGI:2145995	Amigo2	573	550	624	87	354	84	80	10.632	8.958	9.203	1.503	6.531	1.9	1.593	P	A	3.41035	3.16318	3.20207	3.25853	0.587863	2.70722	0.926372	0.672165	1.22341	-0.279737	-0.409133	-0.388773	-1.44954	-0.566147	-1.30844	-1.4144	3.85122	0.023336	0.0585754	-0.3445	-1.1845	0.84
ENSOCUG00000016969	ENSMUSG00000042225	MGI:1860206	Ammecr1	385	618	530	414	378	428	530	7.144	10.066	7.816	7.152	6.973	9.683	10.557	P	P	2.83667	3.33135	2.96652	3.04485	2.83841	2.80186	3.27552	3.40009	3.07897	-0.580059	-0.321093	-0.512086	-0.511466	-0.5267	-0.329267	-0.277347	-0.274005	0.816915	0.846775	-0.4505	-0.411	-0.0395
ENSOCUG00000004917	ENSMUSG00000041915	MGI:2442711	Ammecr1l	887	1196	1002	740	488	381	578	16.458	19.48	14.778	12.784	9.003	8.62	11.513	P	P	4.04075	4.28389	3.88533	4.06999	3.6763	3.17035	3.1077	3.52516	3.36988	0.050279	0.177565	-0.0310808	-0.162214	-0.373104	-0.399218	-0.225212	4.70063	0.0234734	0.0588318	0.114	-0.28975	0.40375
ENSOCUG00000011737	ENSMUSG00000068250	MGI:2442933	Amn1	933	1294	1099	874	880	814	1030	17.312	21.076	16.208	15.099	16.234	18.417	20.516	P	P	4.11369	4.39751	4.01864	4.17661	3.91641	4.02098	4.20294	4.35867	4.12475	0.0884649	0.237046	0.038707	-0.0621316	-0.018546	0.0573005	0.12221	1.62503	0.271749	0.34138	0.1625	0.0245	0.138
ENSOCUG00000001078	ENSMUSG00000013076	MGI:1922973	Amotl1	4527	4384	4780	648	516	315	436	83.999	71.403	70.496	11.195	9.519	7.127	8.684	P	P	6.3923	6.15792	6.13946	6.22989	3.48477	3.25084	2.83326	3.11842	3.17182	1.28132	1.15863	1.14896	-0.242048	-0.339554	-0.51361	-0.39475	19.1206	0.000489112	0.0051647	1.22	-0.37275	1.59275
ENSOCUG00000028052	ENSMUSG00000032531	MGI:1929286	Amotl2	2039	2708	2939	2903	3988	2989	2723	37.834	44.106	43.345	50.152	73.571	67.626	54.237	P	P	5.2416	5.4629	5.43778	5.38076	5.64825	6.20107	6.0795	5.76122	5.92251	0.678932	0.794782	0.781629	0.659736	0.890162	0.839492	0.706824	-0.46636	0.674887	0.71949	0.737	0.774	-0.037
ENSOCUG00000027070	ENSMUSG00000027889	MGI:88016	Ampd2	1142	1489	1500	1620	1902	1258	1233	21.19	24.252	22.122	27.987	35.088	28.462	24.559	P	P	4.4053	4.60002	4.46741	4.49091	4.8067	5.13292	4.83097	4.61819	4.8472	0.241126	0.343058	0.27364	0.30896	0.444935	0.319077	0.230387	-0.498853	0.657021	0.703682	0.292	0.32575	-0.03375
ENSOCUG00000002805	ENSMUSG00000005686	MGI:1096344	Ampd3	664	1259	820	194	130	79	151	12.321	20.506	12.093	3.352	2.398	1.787	3.008	P	A	3.623	4.35795	3.59615	3.85903	1.74483	1.26198	0.837836	1.58864	1.35832	-0.168415	0.216336	-0.182471	-0.967291	-1.16855	-1.34535	-1.0324	5.50213	0.0649538	0.119411	0.024	-1.12825	1.15225
ENSOCUG00000002244	ENSMUSG00000021314	MGI:103574	Amph	81	1552	121	261	474	316	490	1.503	25.278	1.785	4.509	8.744	7.149	9.76	P	P	0.587808	4.6598	0.835531	2.02771	2.17283	3.12836	2.83784	3.28687	2.85647	-1.75735	0.374356	-1.62767	-0.788895	-0.390608	-0.511704	-0.324535	-0.174931	0.889351	0.909071	-0.6915	-0.50425	-0.18725
ENSOCUG00000021266	ENSMUSG00000050022	MGI:2442258	Amz1	389	595	560	2	4	0	0	7.218	9.691	8.259	0.035	0.074	0	0	P	A	2.85158	3.27663	3.04595	3.05806	-4.85508	-3.76038	-5.46595	-5.64976	-4.93279	-0.572253	-0.349738	-0.470502	-3.71828	-3.26198	-3.9729	-4.04952	15.7019	9.93865e-05	0.0023923	-0.461	-3.75075	3.28975
ENSOCUG00000014789	ENSMUSG00000020610	MGI:104837	Amz2	725	968	832	3911	3680	3273	5163	13.452	15.766	12.27	67.567	67.889	74.051	102.838	P	P	3.74979	3.97875	3.61711	3.78188	6.07824	6.08511	6.21045	6.68423	6.26451	-0.102036	0.0178237	-0.171499	0.838966	0.841828	0.894075	1.09156	-11.3211	0.0015052	0.00907873	-0.042	0.91675	-0.95875
ENSOCUG00000012926	ENSMUSG00000014355	MGI:103097	Anapc1	5108	5659	5273	2902	2136	1648	2456	94.779	92.17	77.766	50.135	39.405	37.286	48.919	P	P	6.5665	6.52622	6.28108	6.45793	5.64775	5.30031	5.22056	5.61233	5.44524	1.37252	1.35143	1.2231	0.659529	0.514709	0.481464	0.644765	16.898	0.000241381	0.00358914	1.362	0.57525	0.78675
ENSOCUG00000001819	ENSMUSG00000036977	MGI:1916249	Anapc10	274	381	292	377	294	219	361	5.084	6.205	4.306	6.513	5.424	4.955	7.19	P	P	2.34599	2.63354	2.10649	2.36201	2.70334	2.43929	2.30884	2.84609	2.57439	-0.836934	-0.686402	-0.962312	-0.567765	-0.677827	-0.7322	-0.508263	-1.53709	0.265236	0.335189	-0.7615	-0.6215	-0.14
ENSOCUG00000027501	ENSMUSG00000025135	MGI:1913406	Anapc11	656	975	745	156	210	160	88	12.172	15.88	10.987	2.695	3.874	3.62	1.753	P	A	3.60551	3.98915	3.45776	3.68414	1.43032	1.95386	1.85598	0.809668	1.51246	-0.17757	0.0232656	-0.254915	-1.09839	-0.880163	-0.920961	-1.35709	6.66979	0.0054398	0.0211638	-0.0775	-1.064	0.9865
ENSOCUG00000003793	ENSMUSG00000035048	MGI:1916260	Anapc13	299	339	281	5097	4958	3677	5693	5.548	5.521	4.144	88.056	91.466	83.192	113.395	P	P	2.47196	2.46503	2.05109	2.32936	6.46035	6.51516	6.37837	6.82521	6.54477	-0.770988	-0.774616	-0.991313	0.998238	1.02108	0.964066	1.15032	-44.392	2.41328e-05	0.00132317	-0.773	1.03325	-1.80625
ENSOCUG00000016767	ENSMUSG00000020107	MGI:1289325	Anapc16	764	986	811	2626	2386	1957	2092	14.176	16.059	11.961	45.367	44.017	44.277	41.669	P	P	3.82539	4.00533	3.58023	3.80365	5.50357	5.45999	5.46848	5.3809	5.45324	-0.0624636	0.0317387	-0.190806	0.599431	0.581268	0.584806	0.548301	-12.3019	0.0404024	0.0859943	-0.015	0.57825	-0.59325
ENSOCUG00000016004	ENSMUSG00000029176	MGI:1098673	Anapc4	1657	2724	1778	2440	1941	1577	1898	30.746	44.367	26.222	42.154	35.808	35.679	37.805	P	P	4.94232	5.4714	4.71271	5.04214	5.39759	5.1622	5.15702	5.2405	5.23933	0.522253	0.799231	0.402052	0.555254	0.457141	0.454982	0.489778	1.21927	0.428822	0.491418	0.6605	0.48925	0.17125
ENSOCUG00000002722	ENSMUSG00000029472	MGI:1929722	Anapc5	5560	7474	6436	6931	5706	4360	5203	103.166	121.731	94.918	119.741	105.265	98.645	103.635	P	P	6.68883	6.92755	6.56862	6.72833	6.90377	6.71788	6.62417	6.69536	6.73529	1.43656	1.56153	1.37363	1.18306	1.10558	1.06652	1.0962	5.74942	0.0674899	0.122728	1.4995	1.113	0.3865
ENSOCUG00000014301	ENSMUSG00000029466	MGI:1929711	Anapc7	944	1217	1064	3065	3158	2190	2830	17.516	19.822	15.692	52.951	58.259	49.549	56.369	P	P	4.1306	4.309	3.97195	4.13718	5.72659	5.86441	5.63077	5.81682	5.75965	0.0973173	0.190711	0.0142629	0.692391	0.749837	0.652451	0.730001	-10.8607	0.0231687	0.0582632	0.144	0.706	-0.562
ENSOCUG00000009531	ENSMUSG00000021257	MGI:1915987	Angel1	100	222	122	1190	859	721	708	1.856	3.616	1.799	20.559	15.847	16.313	14.102	A	P	0.891814	1.8543	0.847405	1.19784	4.36167	3.98613	4.02791	3.81784	4.04839	-1.5982	-1.09433	-1.62145	0.123461	-0.0330703	-0.0156556	-0.103217	-5.22124	0.108533	0.171158	-1.346	-0.00725	-1.33875
ENSOCUG00000008585	ENSMUSG00000026634	MGI:1196310	Angel2	1001	1323	1199	781	603	521	706	18.574	21.548	17.683	13.493	11.124	11.788	14.062	P	P	4.21518	4.42949	4.14428	4.26298	3.7541	3.47563	3.55919	3.81376	3.65067	0.141597	0.253785	0.10448	-0.129786	-0.245858	-0.211026	-0.104918	5.6977	0.0392348	0.0840803	0.198	-0.173	0.371
ENSOCUG00000003722	ENSMUSG00000022309	MGI:108448	Angpt1	265	221	207	2208	2052	3622	2334	4.917	3.599	3.053	38.146	37.856	81.947	46.489	A	P	2.29781	1.84779	1.61015	1.91858	5.25344	5.24243	6.35663	5.53883	5.59783	-0.862158	-1.09774	-1.22215	0.495173	0.490583	0.955003	0.614126	-10.068	0.00291362	0.0137577	-0.98	0.63875	-1.61875
ENSOCUG00000015377	ENSMUSG00000031465	MGI:1202890	Angpt2	2497	2775	3393	1261	1476	869	1112	46.332	45.197	50.04	21.785	27.229	19.661	22.149	P	P	5.53394	5.49816	5.64501	5.55904	4.44527	4.76709	4.29727	4.46918	4.4947	0.83197	0.81324	0.890118	0.15831	0.292452	0.0966181	0.168274	15.3383	0.000348053	0.00432377	0.8225	0.17875	0.64375
ENSOCUG00000025012	ENSMUSG00000027460	MGI:1336887	Angpt4	204	110	192	252	240	470	238	3.785	1.792	2.832	4.354	4.428	10.634	4.741	A	P	1.92038	0.841248	1.50163	1.42109	2.1222	2.14651	3.41057	2.24505	2.48108	-1.05974	-1.62467	-1.27896	-0.809997	-0.799865	-0.272976	-0.758788	-2.19416	0.206275	0.275306	-1.3425	-0.6605	-0.682
ENSOCUG00000005167	ENSMUSG00000033544	MGI:1919963	Angptl1	199	154	99	2314	1454	1756	1598	3.692	2.508	1.46	39.977	26.824	39.729	31.829	A	P	1.88458	1.32668	0.546024	1.25243	5.32109	4.74543	5.31213	4.99229	5.09274	-1.07848	-1.37055	-1.77922	0.523371	0.283421	0.519635	0.386318	-10.4894	0.0308352	0.071101	-1.2245	0.428	-1.6525
ENSOCUG00000007685	ENSMUSG00000004105	MGI:1347002	Angptl2	4907	6073	6006	1875	2283	1779	1547	91.05	98.913	88.577	32.393	42.117	40.25	30.814	P	P	6.50858	6.62808	6.46886	6.53517	5.01759	5.39633	5.33091	4.94549	5.17258	1.3422	1.40476	1.3214	0.396866	0.554732	0.527461	0.366813	16.2003	9.80107e-05	0.0023923	1.3735	0.4615	0.912
ENSOCUG00000016603	ENSMUSG00000002289	MGI:1888999	Angptl4	1347	1036	1356	652	967	647	478	24.994	16.874	19.998	11.264	17.839	14.638	9.521	P	P	4.64349	4.0767	4.32181	4.34733	3.49365	4.15699	3.87168	3.2511	3.69335	0.365818	0.0690983	0.197415	-0.238348	0.0381469	-0.0807771	-0.339445	2.18709	0.184411	0.253071	0.2175	-0.155	0.3725
ENSOCUG00000013081	ENSMUSG00000028989	MGI:3605801	Angptl7	378	317	500	432	330	318	282	7.014	5.163	7.374	7.463	6.088	7.195	5.617	P	P	2.8102	2.36823	2.88245	2.68696	2.89981	2.60594	2.84694	2.48979	2.71062	-0.593918	-0.825292	-0.556094	-0.485873	-0.608364	-0.50791	-0.656778	-1.18225	0.414231	0.47836	-0.7095	-0.56475	-0.14475
ENSOCUG00000012051	ENSMUSG00000022265	MGI:3045421	Ank	3130	3832	3094	7054	6366	4379	6748	58.077	62.413	45.63	121.865	117.441	99.074	134.409	P	P	5.8599	5.96377	5.51192	5.77853	6.92915	6.87579	6.63044	7.07048	6.87646	1.00261	1.05699	0.820446	1.19364	1.1714	1.06913	1.25255	-3.02196	0.0408791	0.0866927	1.03	1.17175	-0.14175
ENSOCUG00000011683	ENSMUSG00000031543	MGI:88024	Ank1	383	562	515	273	205	144	92	7.107	9.153	7.595	4.716	3.782	3.258	1.832	P	A	2.82916	3.19431	2.9251	2.98286	2.23768	1.9191	1.70398	0.873798	1.68364	-0.583993	-0.392832	-0.533769	-0.761863	-0.894654	-0.98432	-1.33036	3.26595	0.0352299	0.078113	-0.4885	-0.99275	0.50425
ENSOCUG00000010618	ENSMUSG00000032826	MGI:88025	Ank2	4161	24361	7031	469	491	434	508	77.208	396.774	103.693	8.102	9.058	9.819	10.118	P	P	6.27067	8.63217	6.69618	7.19968	3.01836	3.1792	3.29561	3.33892	3.20802	1.21765	2.45391	1.44041	-0.436456	-0.369418	-0.320896	-0.302841	3.54485	0.174132	0.242327	1.836	-0.35725	2.19325
ENSOCUG00000003521	ENSMUSG00000069601	MGI:88026	Ank3	737	4408	823	721	616	487	607	13.675	71.794	12.138	12.456	11.364	11.018	12.09	P	P	3.77348	6.1658	3.60142	4.51356	3.63878	3.5064	3.46183	3.59579	3.5507	-0.0896377	1.16275	-0.179713	-0.177855	-0.233031	-0.251609	-0.195773	1.19869	0.442406	0.504725	0.5365	-0.21475	0.75125
ENSOCUG00000014843	ENSMUSG00000020790	MGI:1337008	Ankfy1	3875	5373	4306	2025	1376	915	1159	71.901	87.511	63.505	34.984	25.385	20.702	23.085	P	P	6.16794	6.4514	5.9888	6.20271	5.12863	4.66588	4.37168	4.5289	4.67377	1.16387	1.31227	1.07009	0.443146	0.250264	0.127636	0.193168	9.80241	0.00324812	0.014765	1.238	0.2535	0.9845
ENSOCUG00000015943	ENSMUSG00000024483	MGI:1921733	Ankhd1	3729	4817	4681	4663	3969	2792	4591	69.192	78.456	69.036	80.558	73.221	63.169	91.445	P	P	6.11253	6.29381	6.10927	6.17187	6.33196	6.19418	5.98114	6.51483	6.25553	1.13487	1.22976	1.13316	0.944723	0.88729	0.798492	1.02095	4.03377	0.0278703	0.0662872	1.1825	0.91275	0.26975
ENSOCUG00000004576	ENSMUSG00000040351	MGI:1918047	Ankib1	2010	3107	2385	2617	2261	2061	2567	37.296	50.605	35.174	45.212	41.711	46.63	51.13	P	P	5.22094	5.6612	5.13644	5.33952	5.49862	5.38236	5.54318	5.6761	5.52507	0.668113	0.898589	0.623879	0.597367	0.548909	0.615943	0.671347	1.48238	0.362133	0.42957	0.7835	0.60825	0.17525
ENSOCUG00000008406	ENSMUSG00000029501	MGI:1261856	Ankle2	1701	2234	1848	1660	1462	1107	1365	31.562	36.386	27.254	28.678	26.971	25.046	27.188	P	P	4.98013	5.1853	4.76842	4.97795	4.84189	4.75334	4.64649	4.76492	4.75166	0.542047	0.649458	0.431216	0.323627	0.286721	0.242183	0.291546	5.51268	0.0844461	0.143653	0.5955	0.28625	0.30925
ENSOCUG00000016409	ENSMUSG00000036188	MGI:2144755	Ankmy2	737	979	721	1216	923	650	898	13.675	15.945	10.633	21.008	17.028	14.706	17.887	P	P	3.77348	3.99505	3.41052	3.72635	4.39285	4.0898	3.87835	4.16081	4.13045	-0.0896377	0.0263577	-0.279646	0.136458	0.0101426	-0.0779952	0.039739	-0.809588	0.495117	0.553881	-0.032	0.027	-0.059
ENSOCUG00000000615	ENSMUSG00000021661	MGI:1915808	Ankra2	430	634	456	931	670	648	1038	7.979	10.326	6.725	16.084	12.36	14.661	20.675	P	P	2.99615	3.36823	2.74956	3.03798	4.00756	3.62763	3.8739	4.36983	3.96973	-0.496572	-0.301788	-0.625664	-0.0241392	-0.1825	-0.0798484	0.126863	-3.07745	0.0947122	0.156041	-0.3995	-0.03975	-0.35975
ENSOCUG00000006901	ENSMUSG00000024803	MGI:1097717	Ankrd1	306	769	660	16385	6805	11868	11091	5.678	12.525	9.734	283.069	125.539	268.512	220.914	P	P	2.50535	3.64673	3.28299	3.14502	8.14501	6.972	8.06884	7.78734	7.7433	-0.75351	-0.155992	-0.346411	1.70044	1.2115	1.66869	1.55135	-6.22833	0.0642963	0.118606	-0.455	1.533	-1.988
ENSOCUG00000007521	ENSMUSG00000031508	MGI:1921840	Ankrd10	1792	1861	1971	1264	1679	1069	440	33.251	30.311	29.068	21.837	30.974	24.186	8.764	P	P	5.05531	4.92175	4.86138	4.94615	4.4487	4.953	4.5961	3.1316	4.28235	0.581408	0.511487	0.479883	0.159739	0.369943	0.221178	-0.389259	2.68795	0.0682974	0.12354	0.546	0.0905	0.4555
ENSOCUG00000003188	ENSMUSG00000035569	MGI:1924337	Ankrd11	4560	6719	6914	2291	2342	1421	1660	84.611	109.434	101.968	39.58	43.205	32.15	33.064	P	P	6.40278	6.77392	6.67197	6.61622	5.30668	5.43314	5.00675	5.0472	5.19844	1.28681	1.48111	1.42774	0.517364	0.570075	0.392344	0.409208	8.60141	0.0345469	0.0770728	1.384	0.472	0.912
ENSOCUG00000025998	ENSMUSG00000034647	MGI:1914357	Ankrd12	2211	3753	3681	3152	3636	3260	3496	41.025	61.126	54.288	54.454	67.077	73.757	69.634	P	P	5.35844	5.93372	5.76255	5.6849	5.76697	6.06775	6.20471	6.12173	6.04029	0.740097	1.04126	0.951649	0.709222	0.834594	0.891682	0.857092	0.431958	0.733069	0.770871	0.8905	0.82325	0.06725
ENSOCUG00000001060	ENSMUSG00000041870	MGI:1915670	Ankrd13a	2012	2424	2497	1214	779	665	838	37.333	39.48	36.826	20.973	14.371	15.046	16.692	P	P	5.22237	5.30306	5.20265	5.24269	4.39047	3.8451	3.91127	4.06104	4.05197	0.668864	0.711106	0.658538	0.135468	-0.0918566	-0.0642757	-0.00184527	12.7117	0.000303602	0.00402884	0.69	-0.00575	0.69575
ENSOCUG00000012687	ENSMUSG00000037907	MGI:2144501	Ankrd13b	250	564	487	139	178	130	137	4.639	9.186	7.182	2.401	3.284	2.941	2.729	P	A	2.21374	3.19944	2.84445	2.75254	1.26386	1.71535	1.55642	1.44827	1.49598	-0.906166	-0.390149	-0.57599	-1.16777	-0.97958	-1.04582	-1.09091	1.62162	0.343543	0.411279	-0.648	-1.07125	0.42325
ENSOCUG00000002007	ENSMUSG00000039988	MGI:2139746	Ankrd13c	1124	1884	1444	1987	1538	1346	2039	20.856	30.685	21.296	34.328	28.373	30.453	40.613	P	P	4.38238	4.93947	4.41252	4.57813	5.1013	4.82646	4.92852	5.34388	5.05004	0.229127	0.520764	0.244904	0.431755	0.317195	0.359737	0.53287	-0.23135	0.849839	0.874565	0.375	0.4105	-0.0355
ENSOCUG00000006388	ENSMUSG00000005986	MGI:1915673	Ankrd13d	175	406	209	310	709	195	252	3.247	6.613	3.082	5.356	13.08	4.412	5.019	A	P	1.69917	2.72522	1.62403	2.01614	2.42104	3.70926	2.14139	2.32752	2.6498	-1.17555	-0.638403	-1.21488	-0.685432	-0.148477	-0.802	-0.724416	-1.03128	0.429264	0.49177	-0.907	-0.58975	-0.31725
ENSOCUG00000011370	ENSMUSG00000047909	MGI:2444796	Ankrd16	857	1007	1153	82	160	49	105	15.902	16.401	17.004	1.417	2.952	1.109	2.091	P	A	3.99111	4.03574	4.08784	4.03823	0.502472	1.56154	0.148765	1.06448	0.819316	0.0242928	0.0476554	0.074934	-1.48513	-1.04369	-1.63257	-1.25088	10.6698	0.00163225	0.00958884	0.036	-1.35325	1.38925
ENSOCUG00000008269	ENSMUSG00000007827	MGI:1917887	Ankrd26	411	654	542	536	416	474	458	7.626	10.652	7.993	9.26	7.674	10.724	9.123	P	P	2.93095	3.41304	2.99882	3.11427	3.21101	2.94006	3.4228	3.18944	3.19083	-0.530704	-0.278331	-0.495176	-0.356158	-0.469097	-0.267879	-0.365148	-0.300707	0.806821	0.83783	-0.4045	-0.3645	-0.04
ENSOCUG00000013225	ENSMUSG00000034867	MGI:2444103	Ankrd27	1289	2246	1554	739	511	370	376	23.917	36.581	22.918	12.767	9.427	8.371	7.489	P	P	4.57999	5.19303	4.51844	4.76382	3.67435	3.2368	3.06544	2.90483	3.22035	0.332577	0.653504	0.300352	-0.163027	-0.345409	-0.416835	-0.483782	4.83917	0.0780348	0.135981	0.4935	-0.35225	0.84575
ENSOCUG00000008568	ENSMUSG00000014496	MGI:2145661	Ankrd28	2707	3778	3373	1821	1034	962	1589	50.229	61.533	49.745	31.46	19.075	21.765	31.65	P	P	5.65044	5.9433	5.63648	5.74341	4.97544	4.25364	4.44395	4.98414	4.66429	0.892958	1.04627	0.885653	0.379293	0.078432	0.157758	0.382921	6.60476	0.00674411	0.0243594	0.9695	0.2495	0.72
ENSOCUG00000009866	ENSMUSG00000057766	MGI:2687055	Ankrd29	160	388	140	1934	1809	1648	2230	2.969	6.319	2.065	33.412	33.373	37.286	44.418	A	P	1.56989	2.6598	1.04595	1.75855	5.06229	5.06059	5.22056	5.47306	5.20413	-1.24323	-0.672652	-1.51751	0.415497	0.414789	0.481464	0.586716	-4.97608	0.119105	0.183022	-0.958	0.4745	-1.4325
ENSOCUG00000002595	ENSMUSG00000022237	MGI:1917904	Ankrd33b	248	390	400	4	2	2	6	4.602	6.352	5.899	0.069	0.037	0.045	0.12	P	A	2.20215	2.66722	2.56052	2.47663	-3.85508	-4.76038	-4.46595	-3.0648	-4.03655	-0.912232	-0.668769	-0.724624	-3.30145	-3.6788	-3.55608	-2.97205	13.0667	0.000321049	0.0041612	-0.7905	-3.377	2.5865
ENSOCUG00000012369	ENSMUSG00000050914	MGI:3603344	Ankrd37	51	55	49	378	320	270	409	0.946	0.896	0.723	6.53	5.903	6.109	8.147	A	P	-0.0796169	-0.158752	-0.468623	-0.235664	2.70716	2.56154	2.61087	3.02619	2.72644	-2.10675	-2.14818	-2.31039	-0.566172	-0.626868	-0.606308	-0.433193	-32.6102	6.67641e-06	0.000764016	-2.1275	-0.558	-1.5695
ENSOCUG00000024245	ENSMUSG00000079610	MGI:1914816	Ankrd39	236	271	272	378	481	224	138	4.379	4.414	4.011	6.53	8.874	5.068	2.749	A	P	2.1306	2.14204	2.00413	2.09226	2.70716	3.14951	2.34141	1.45876	2.41421	-0.949691	-0.943704	-1.0159	-0.566172	-0.381792	-0.718625	-1.08653	-1.72721	0.182509	0.251027	-0.947	-0.6885	-0.2585
ENSOCUG00000024074	ENSMUSG00000020864	MGI:1918702	Ankrd40	1500	2012	1700	2733	1952	1705	2338	27.833	32.77	25.072	47.216	36.011	38.575	46.569	P	P	4.7987	5.0343	4.64799	4.827	5.56119	5.17035	5.26961	5.5413	5.38561	0.447072	0.570409	0.368171	0.623448	0.460539	0.501912	0.615156	-0.566549	0.629697	0.679354	0.5085	0.55025	-0.04175
ENSOCUG00000009183	ENSMUSG00000052331	MGI:3045243	Ankrd44	1548	1963	1823	871	580	352	736	28.723	31.972	26.886	15.047	10.7	7.964	14.66	P	P	4.84415	4.99873	4.74877	4.86388	3.91145	3.41953	2.99349	3.8738	3.54956	0.470862	0.551788	0.420929	-0.0641993	-0.269243	-0.446826	-0.0798928	7.34347	0.00210058	0.011153	0.5115	-0.215	0.7265
ENSOCUG00000009778	ENSMUSG00000048307	MGI:1916089	Ankrd46	1307	1829	1422	1622	1399	844	1251	24.251	29.789	20.972	28.022	25.809	19.095	24.918	P	P	4.6	4.89673	4.39037	4.62903	4.80848	4.6898	4.25515	4.6391	4.59813	0.34305	0.498388	0.233309	0.309702	0.260233	0.0790645	0.239102	2.15302	0.171261	0.239278	0.4205	0.222	0.1985
ENSOCUG00000014912	ENSMUSG00000031931	MGI:1930842	Ankrd49	330	432	402	300	253	229	293	6.123	7.036	5.929	5.183	4.667	5.181	5.836	P	P	2.61428	2.81478	2.56772	2.66559	2.37374	2.22261	2.37326	2.54499	2.37865	-0.696483	-0.591522	-0.720858	-0.70515	-0.768144	-0.70535	-0.633767	1.00397	0.443466	0.505697	-0.644	-0.703	0.059
ENSOCUG00000006096	ENSMUSG00000044864	MGI:2139777	Ankrd50	1944	2780	2237	2101	1546	1558	1821	36.071	45.279	32.991	36.297	28.521	35.25	36.271	P	P	5.17277	5.50076	5.04402	5.23918	5.18178	4.83394	5.13953	5.18075	5.084	0.642897	0.8146	0.575494	0.465302	0.320315	0.447693	0.464873	3.27867	0.134775	0.200544	0.729	0.4245	0.3045
ENSOCUG00000007206	ENSMUSG00000014498	MGI:2444029	Ankrd52	1645	2642	2373	771	459	273	365	30.523	43.031	34.997	13.32	8.468	6.177	7.27	P	P	4.93183	5.4273	5.12916	5.16277	3.73551	3.08197	2.62681	2.86199	3.07657	0.516764	0.776146	0.620069	-0.137536	-0.409945	-0.599663	-0.501637	6.4874	0.0166628	0.0461429	0.6465	-0.4125	1.059
ENSOCUG00000002834	ENSMUSG00000033055	MGI:2444209	Ankrd54	257	364	363	532	528	423	333	4.769	5.929	5.354	9.191	9.741	9.57	6.633	P	P	2.25358	2.56768	2.42049	2.41392	3.2002	3.28401	3.25857	2.72961	3.1181	-0.885309	-0.720876	-0.797931	-0.360662	-0.325729	-0.336334	-0.556813	-4.14386	0.0558803	0.107375	-0.803	-0.395	-0.408
ENSOCUG00000004531	ENSMUSG00000040183	MGI:2154278	Ankrd6	171	1153	239	12	17	22	14	3.173	18.779	3.525	0.207	0.314	0.498	0.279	P	A	1.66581	4.23107	1.81753	2.57147	-2.27012	-1.67292	-1.00651	-1.84241	-1.69799	-1.19301	0.149911	-1.11358	-2.64081	-2.39188	-2.11411	-2.46253	2.76467	0.210583	0.279599	-0.5215	-2.4025	1.881
ENSOCUG00000015569	ENSMUSG00000024219	MGI:2446180	Anks1	1283	1708	1663	1457	1251	652	1109	23.806	27.819	24.526	25.171	23.079	14.751	22.089	P	P	4.57326	4.79798	4.61624	4.66249	4.65371	4.52848	3.88278	4.46528	4.38256	0.329053	0.446693	0.351551	0.245189	0.192994	-0.0761478	0.166649	2.76385	0.058098	0.11044	0.388	0.13225	0.25575
ENSOCUG00000009493	ENSMUSG00000022515	MGI:1919865	Anks3	891	1067	1097	715	908	556	462	16.533	17.379	16.179	12.352	16.751	12.579	9.202	P	P	4.04724	4.11923	4.01602	4.06083	3.62672	4.06616	3.653	3.20199	3.63697	0.0536772	0.0913662	0.0373313	-0.182881	0.000289645	-0.171928	-0.359919	3.31402	0.0384471	0.0831981	0.0725	-0.17875	0.25125
ENSOCUG00000016201	ENSMUSG00000066191	MGI:1922941	Anks6	315	310	422	787	780	585	671	5.845	5.049	6.224	13.596	14.39	13.236	13.365	P	P	2.54717	2.33601	2.63777	2.50698	3.76514	3.84695	3.72635	3.74041	3.76971	-0.731617	-0.842157	-0.684187	-0.125184	-0.0910852	-0.141353	-0.135494	-11.8314	0.0444644	0.0917296	-0.787	-0.123	-0.664
ENSOCUG00000015131	ENSMUSG00000026199	MGI:1098746	Ankzf1	535	667	715	1139	1499	908	786	9.927	10.864	10.545	19.677	27.654	20.543	15.656	P	P	3.31135	3.44143	3.39847	3.38375	4.29847	4.7894	4.3606	3.96862	4.35427	-0.331562	-0.263466	-0.285958	0.0971202	0.30175	0.123018	-0.0403683	-5.33941	0.00620871	0.0230592	-0.2975	0.1205	-0.418
ENSOCUG00000005159	ENSMUSG00000036777	MGI:1920174	Anln	1263	1162	1180	1073	452	773	739	23.435	18.926	17.403	18.537	8.339	17.489	14.72	P	P	4.5506	4.24228	4.12124	4.30471	4.21235	3.0598	4.12838	3.87967	3.82005	0.317187	0.155783	0.0924161	0.0612246	-0.419187	0.0262221	-0.0774466	2.4915	0.0707444	0.126635	0.2365	-0.10225	0.33875
ENSOCUG00000008275	ENSMUSG00000037949	MGI:2143103	Ano10	1237	1649	1448	3053	2865	1987	2978	22.953	26.858	21.355	52.744	52.854	44.956	59.317	P	P	4.52059	4.74726	4.41651	4.56146	5.72093	5.72394	5.49043	5.89036	5.70642	0.301477	0.420143	0.246994	0.690032	0.691284	0.593954	0.760655	-4.71051	0.0564848	0.108064	0.3605	0.684	-0.3235
ENSOCUG00000000881	ENSMUSG00000035189	MGI:2443344	Ano4	8	9	8	4673	2630	1955	3658	0.148	0.147	0.118	80.731	48.519	44.232	72.861	A	P	-2.75204	-2.77019	-3.08333	-2.86852	6.33505	5.60046	5.46701	6.18708	5.8974	-3.50577	-3.51527	-3.67921	0.946011	0.639818	0.584191	0.884331	-47.8992	1.9151e-05	0.00123366	-3.5105	0.7635	-4.274
ENSOCUG00000000185	ENSMUSG00000064210	MGI:2145890	Ano6	5309	7059	6182	5752	4991	3737	4043	98.509	114.972	91.172	99.372	92.074	84.549	80.53	P	P	6.62218	6.84514	6.51053	6.65928	6.63477	6.52473	6.40172	6.33145	6.47317	1.40167	1.51839	1.34322	1.07094	1.02507	0.973799	0.944508	7.09101	0.0400318	0.0853736	1.46	1.00375	0.45625
ENSOCUG00000000086	ENSMUSG00000032249	MGI:108447	Anp32a	1459	1783	1467	2630	2280	1718	1953	27.072	29.04	21.635	45.436	42.062	38.87	38.9	P	P	4.75872	4.85998	4.43532	4.68467	5.50577	5.39443	5.28057	5.28171	5.36562	0.426141	0.47915	0.256839	0.600347	0.553941	0.506479	0.506956	-2.57145	0.0984515	0.160194	0.4525	0.54175	-0.08925
ENSOCUG00000024496	ENSMUSG00000015749	MGI:1913721	Anp32e	1300	1590	1361	15	4	6	4	24.122	25.897	20.072	0.259	0.074	0.136	0.08	P	A	4.59225	4.6947	4.32712	4.53802	-1.94819	-3.76038	-2.88098	-3.64976	-3.05983	0.338994	0.392625	0.200195	-2.50662	-3.26198	-2.89543	-3.21587	18.8833	0.000244374	0.0036068	0.366	-2.97	3.336
ENSOCUG00000017659	ENSMUSG00000039062	MGI:5000466	Anpep	4481	5103	7209	2785	2004	968	2764	83.145	83.114	106.319	48.114	36.97	21.901	55.054	P	P	6.37756	6.37702	6.73225	6.49561	5.58838	5.20828	4.45292	5.78278	5.25809	1.27361	1.27333	1.45929	0.634782	0.476349	0.161497	0.715811	6.33403	0.00795662	0.0272418	1.2735	0.497	0.7765
ENSOCUG00000010232	ENSMUSG00000033420	MGI:1916788	Antxr1	5830	6117	6246	4493	3730	2851	4330	108.176	99.629	92.116	77.621	68.811	64.504	86.246	P	P	6.75724	6.6385	6.52538	6.64037	6.27838	6.10458	6.01131	6.43039	6.20616	1.47237	1.41021	1.351	0.92239	0.849943	0.811067	0.985748	11.0503	0.00064048	0.00591077	1.441	0.89225	0.54875
ENSOCUG00000004747	ENSMUSG00000029338	MGI:1919164	Antxr2	2759	3403	2946	3562	3260	2068	2113	51.193	55.426	43.448	61.537	60.141	46.788	42.087	P	P	5.67789	5.79248	5.44121	5.63719	5.94339	5.91027	5.54808	5.39531	5.69926	0.907328	0.967318	0.783426	0.782758	0.768953	0.617982	0.554307	4.00432	0.0162227	0.0452017	0.937	0.681	0.256
ENSOCUG00000015493	ENSMUSG00000024659	MGI:96819	Anxa1	9390	12087	12085	50608	44306	38676	55000	174.232	196.864	178.23	874.308	817.362	875.04	1095.51	P	P	7.44487	7.62106	7.4776	7.51451	9.772	9.67483	9.77321	10.0974	9.82935	1.83235	1.92459	1.84948	2.3786	2.3381	2.37911	2.51423	-8.6888	0.00672231	0.0243349	1.8785	2.4025	-0.524
ENSOCUG00000004569	ENSMUSG00000021866	MGI:108481	Anxa11	1387	1380	1494	15139	11161	8513	9169	25.736	22.476	22.034	261.543	205.899	192.606	182.631	P	P	4.68571	4.49034	4.46163	4.54589	8.0309	7.68579	7.58951	7.51279	7.70475	0.387919	0.285643	0.270613	1.65288	1.50903	1.46889	1.43691	-16.9038	0.000667921	0.00601562	0.337	1.517	-1.18
ENSOCUG00000004146	ENSMUSG00000032231	MGI:88246	Anxa2	11499	14438	12013	69848	43906	38594	55053	213.365	235.156	177.168	1206.7	809.982	873.185	1096.56	P	P	7.73718	7.87747	7.46898	7.69454	10.2369	9.66175	9.77014	10.0988	9.94188	1.98538	2.05882	1.84497	2.57236	2.33265	2.37783	2.51481	-6.3488	0.00330925	0.0149526	2.022	2.4495	-0.4275
ENSOCUG00000017878	ENSMUSG00000029484	MGI:1201378	Anxa3	3393	3251	3886	9606	7177	6628	7815	62.957	52.95	57.311	165.954	132.402	149.958	155.661	P	P	5.9763	5.72656	5.84074	5.84787	7.37464	7.04878	7.22841	7.28227	7.23353	1.06355	0.932806	0.992581	1.37933	1.24351	1.31838	1.34083	-4.50949	0.0851492	0.144639	0.9985	1.3205	-0.322
ENSOCUG00000015796	ENSMUSG00000029994	MGI:88030	Anxa4	3374	3822	3940	7109	3085	2765	2234	62.605	62.25	58.107	122.816	56.912	62.558	44.497	P	P	5.9682	5.96	5.86065	5.92962	6.94035	5.83067	5.96712	5.47565	6.05345	1.05931	1.05502	1.003	1.19831	0.735774	0.792648	0.587793	1.74959	0.178456	0.246926	1.057	0.82875	0.22825
ENSOCUG00000017760	ENSMUSG00000027712	MGI:106008	Anxa5	10595	12528	10567	48732	42606	37786	51459	196.591	204.047	155.843	841.898	786	854.904	1024.97	P	P	7.61905	7.67276	7.28395	7.52525	9.7175	9.61839	9.73962	10.0014	9.76922	1.92354	1.95165	1.74811	2.35589	2.31457	2.36511	2.47421	-11.9657	0.000384209	0.00453857	1.938	2.3775	-0.4395
ENSOCUG00000005379	ENSMUSG00000018340	MGI:88255	Anxa6	7039	8746	7018	7953	8563	6362	6367	130.609	142.448	103.502	137.397	157.971	143.94	126.82	P	P	7.02911	7.1543	6.69351	6.95897	7.1022	7.30352	7.16932	6.98663	7.14042	1.6147	1.68023	1.43901	1.26578	1.34969	1.29375	1.2176	8.57629	0.00627548	0.0232362	1.6475	1.282	0.3655
ENSOCUG00000012532	ENSMUSG00000021814	MGI:88031	Anxa7	3827	5191	4165	6057	4762	3619	5319	71.01	84.547	61.426	104.641	87.85	81.879	105.945	P	P	6.14996	6.40169	5.94077	6.16414	6.70931	6.45697	6.35543	6.72718	6.56222	1.15446	1.28624	1.04495	1.10201	0.996828	0.954505	1.10946	2.34779	0.163159	0.230675	1.22	1.04075	0.17925
ENSOCUG00000014189	ENSMUSG00000021950	MGI:1201374	Anxa8	2673	2841	2074	2663	2196	1851	5997	49.598	46.272	30.587	46.006	40.512	41.879	119.45	P	P	5.6322	5.53207	4.93487	5.36638	5.52376	5.34028	5.38814	6.90026	5.78811	0.883411	0.830993	0.518354	0.607845	0.531368	0.551319	1.1816	0.881517	0.439898	0.502394	0.857	0.718	0.139
ENSOCUG00000014567	ENSMUSG00000021322	MGI:1350928	Aoah	433	738	587	20369	8453	8629	9390	8.034	12.02	8.657	351.897	155.942	195.23	187.033	P	P	3.00618	3.58737	3.11388	3.23581	8.45901	7.28486	7.60903	7.54715	7.72501	-0.491321	-0.187069	-0.434938	1.83132	1.34191	1.47703	1.45124	-10.0593	0.00898689	0.0297737	-0.339	1.52525	-1.86425
ENSOCUG00000015997	ENSMUSG00000078651	MGI:2668431	Aoc2	81	111	96	818	1245	798	928	1.503	1.808	1.416	14.132	22.968	18.055	18.484	A	P	0.587808	0.854304	0.50163	0.647914	3.82088	4.52155	4.1743	4.20822	4.18124	-1.75735	-1.61784	-1.80246	-0.101952	0.190102	0.0453627	0.0595002	-18.9405	0.000808564	0.00648919	-1.6875	0.04825	-1.73575
ENSOCUG00000009490	ENSMUSG00000009090	MGI:1096368	Ap1b1	1994	3108	2479	3183	1827	1497	2047	36.999	50.621	36.56	54.99	33.705	33.869	40.773	P	P	5.20941	5.66166	5.19221	5.35443	5.78109	5.07488	5.08191	5.34953	5.32185	0.662077	0.898833	0.653074	0.715108	0.420743	0.423675	0.535225	1.87205	0.221616	0.290873	0.7805	0.52375	0.25675
ENSOCUG00000004412	ENSMUSG00000031731	MGI:101919	Ap1g1	2257	3288	2534	5501	4216	3711	5740	41.879	53.553	37.372	95.036	77.777	83.961	114.331	P	P	5.38815	5.74288	5.22387	5.45163	6.5704	6.28128	6.39165	6.83707	6.5201	0.755648	0.941353	0.669647	1.04411	0.923595	0.969601	1.15526	-1.65897	0.265742	0.335655	0.8485	1.02325	-0.17475
ENSOCUG00000007722	ENSMUSG00000040701	MGI:1328307	Ap1g2	273	368	391	240	122	85	159	5.066	5.994	5.766	4.146	2.251	1.923	3.167	P	A	2.34071	2.58345	2.52769	2.48395	2.05181	1.17035	0.943446	1.66312	1.45718	-0.839695	-0.712622	-0.741812	-0.839336	-1.20675	-1.30133	-1.00135	2.55314	0.0632619	0.117165	-0.7765	-1.087	0.3105
ENSOCUG00000025980	ENSMUSG00000003033	MGI:102776	Ap1m1	777	1349	1065	2539	2168	1825	2128	14.417	21.972	15.707	43.864	39.995	41.29	42.386	P	P	3.84973	4.45756	3.97331	4.09353	5.45496	5.32177	5.36774	5.40552	5.3875	-0.0497205	0.268483	0.0149724	0.579171	0.523651	0.542812	0.558561	-2.77396	0.218104	0.287357	0.109	0.55125	-0.44225
ENSOCUG00000010799	ENSMUSG00000004849	MGI:1098244	Ap1s1	649	1336	872	1743	1611	1355	960	12.042	21.76	12.86	30.112	29.72	30.657	19.122	P	P	3.59003	4.44359	3.68485	3.90616	4.91228	4.89336	4.93813	4.25713	4.75022	-0.185672	0.26117	-0.136034	0.352967	0.345081	0.363744	0.0798868	-1.06076	0.45755	0.518174	0.0375	0.2855	-0.248
ENSOCUG00000004302	ENSMUSG00000031367	MGI:1889383	Ap1s2	1082	1650	1159	3804	1899	2080	3828	20.077	26.874	17.093	65.718	35.033	47.06	76.247	P	P	4.32744	4.74814	4.09533	4.3903	6.03822	5.13064	5.55642	6.25261	5.74447	0.200365	0.420601	0.0788541	0.822285	0.443986	0.621461	0.911647	-2.5568	0.0881504	0.148449	0.3105	0.69975	-0.38925
ENSOCUG00000023153	ENSMUSG00000060279	MGI:101921	Ap2a1	1658	2903	2068	3617	3855	2642	2675	30.764	47.282	30.499	62.488	71.117	59.775	53.281	P	P	4.94319	5.56322	4.93069	5.1457	5.9655	6.15213	5.90147	5.73556	5.93866	0.522709	0.847298	0.516166	0.791972	0.869765	0.765284	0.696129	-0.577	0.659605	0.705984	0.685	0.78075	-0.09575
ENSOCUG00000004060	ENSMUSG00000035152	MGI:1919020	Ap2b1	3928	7131	4826	8193	4310	3630	6724	72.884	116.145	71.174	141.543	79.511	82.128	133.93	P	P	6.18754	6.85978	6.15328	6.4002	7.1451	6.31309	6.35981	7.06534	6.72083	1.17413	1.52605	1.1562	1.28365	0.936856	0.95633	1.25041	1.22239	0.371974	0.439154	1.35	1.10675	0.24325
ENSOCUG00000004556	ENSMUSG00000022841	MGI:1298405	Ap2m1	2634	4868	3314	25264	13139	11154	14054	48.874	79.286	48.875	436.463	242.39	252.358	279.931	P	P	5.611	6.309	5.61103	5.84367	8.76972	7.92118	7.97933	8.12893	8.19979	0.872311	1.23772	0.872325	1.96083	1.60714	1.63138	1.69374	-3.33683	0.124171	0.188338	1.055	1.72325	-0.66825
ENSOCUG00000000140	ENSMUSG00000021686	MGI:1333879	Ap3b1	2087	2610	2552	5627	3650	3138	5588	38.724	42.51	37.637	97.213	67.336	70.997	111.303	P	P	5.27517	5.40972	5.23408	5.30633	6.60307	6.0733	6.14968	6.79835	6.4061	0.696505	0.766943	0.674993	1.05773	0.836905	0.868745	1.13912	-3.00867	0.0406934	0.0864624	0.732	0.97575	-0.24375
ENSOCUG00000006449	ENSMUSG00000062444	MGI:1100869	Ap3b2	86	1631	145	184	268	174	136	1.596	26.565	2.138	3.179	4.944	3.937	2.709	P	A	0.674222	4.73143	1.09658	2.16741	1.66848	2.30571	1.977	1.4377	1.84722	-1.71211	0.411854	-1.49101	-0.999116	-0.733507	-0.87052	-1.09531	0.258008	0.838899	0.865595	-0.65	-0.92475	0.27475
ENSOCUG00000009946	ENSMUSG00000021824	MGI:1929212	Ap3m1	1326	1841	1425	2175	1215	1103	2298	24.604	29.985	21.016	37.575	22.414	24.955	45.772	P	P	4.62082	4.90616	4.39341	4.64013	5.23172	4.48636	4.64127	5.5164	4.96894	0.35395	0.503327	0.234901	0.486118	0.175435	0.240007	0.604779	0.413211	0.701722	0.743454	0.4285	0.3765	0.052
ENSOCUG00000009960	ENSMUSG00000031539	MGI:1929214	Ap3m2	481	1079	632	431	299	244	208	8.925	17.574	9.321	7.446	5.516	5.52	4.143	P	P	3.15785	4.13537	3.22045	3.50456	2.89646	2.46362	2.46479	2.05068	2.46889	-0.411921	0.0998127	-0.379151	-0.487267	-0.667686	-0.667197	-0.839809	1.91577	0.27843	0.34793	-0.156	-0.6655	0.5095
ENSOCUG00000027325	ENSMUSG00000024480	MGI:1337062	Ap3s1	718	1094	797	10	34	14	44	13.323	17.818	11.754	0.173	0.627	0.317	0.876	P	A	3.7358	4.15529	3.5551	3.8154	-2.53315	-0.672921	-1.65859	-0.190332	-1.26375	-0.109364	0.11024	-0.203958	-2.75045	-1.97506	-2.38591	-1.77391	9.12573	0.000846291	0.00662213	0.0005	-2.22125	2.22175
ENSOCUG00000003778	ENSMUSG00000032952	MGI:1337130	Ap4b1	51	73	58	567	532	323	349	0.946	1.189	0.855	9.796	9.814	7.308	6.951	A	P	-0.0796169	0.249713	-0.225352	-0.0184185	3.29212	3.2949	2.86945	2.79732	3.06345	-2.10675	-1.93434	-2.18304	-0.322347	-0.321191	-0.498529	-0.528592	-15.5616	0.00507602	0.0201282	-2.0205	-0.41775	-1.60275
ENSOCUG00000007193	ENSMUSG00000001998	MGI:1336993	Ap4e1	897	1162	1012	1168	949	1192	1500	16.644	18.926	14.925	20.178	17.507	26.969	29.877	P	P	4.05692	4.24228	3.89966	4.06629	4.33474	4.12988	4.75322	4.90098	4.52971	0.0587461	0.155783	-0.0235806	0.112239	0.0268478	0.28667	0.34826	-0.96552	0.389546	0.455259	0.1075	0.1935	-0.086
ENSOCUG00000000304	ENSMUSG00000019518	MGI:1337063	Ap4m1	426	520	485	563	518	422	304	7.904	8.469	7.153	9.726	9.556	9.548	6.055	P	P	2.98267	3.08226	2.83851	2.96781	3.28191	3.25642	3.25515	2.59816	3.09791	-0.50363	-0.451495	-0.579098	-0.326604	-0.337227	-0.337757	-0.611605	-0.994327	0.380555	0.446845	-0.4775	-0.4035	-0.074
ENSOCUG00000011430	ENSMUSG00000020955	MGI:1337065	Ap4s1	371	448	428	297	305	272	462	6.884	7.297	6.312	5.131	5.627	6.154	9.202	P	P	2.78323	2.86724	2.65813	2.76954	2.35924	2.49228	2.62152	3.20199	2.66876	-0.608035	-0.564055	-0.673525	-0.711194	-0.655739	-0.60187	-0.359919	-0.0466301	0.965388	0.971376	-0.586	-0.58225	-0.00375
ENSOCUG00000029210	ENSMUSG00000049562	MGI:2685808	Ap5b1	269	344	362	214	213	172	50	4.991	5.603	5.339	3.697	3.929	3.891	0.996	P	A	2.31942	2.48615	2.41651	2.40736	1.88639	1.97433	1.96032	-0.00590732	1.45378	-0.850843	-0.763558	-0.800014	-0.908288	-0.871634	-0.877472	-1.69704	1.35358	0.262052	0.332072	-0.8075	-1.0885	0.281
ENSOCUG00000009782	ENSMUSG00000036291	MGI:1921635	Ap5m1	764	1158	935	699	551	467	852	14.176	18.861	13.789	12.076	10.165	10.566	16.97	P	P	3.82539	4.23731	3.78549	3.94939	3.59407	3.34552	3.40133	4.08495	3.60647	-0.0624636	0.153179	-0.0833496	-0.19649	-0.300089	-0.276826	0.00811809	1.84506	0.21192	0.281105	0.0455	-0.19125	0.23675
ENSOCUG00000021338	ENSMUSG00000039623	MGI:1924908	Ap5z1	395	596	588	1547	1583	1020	846	7.329	9.707	8.672	26.726	29.203	23.077	16.851	P	P	2.87367	3.27906	3.11634	3.08969	4.74018	4.86806	4.52841	4.07475	4.55285	-0.560693	-0.348469	-0.433652	0.281233	0.334538	0.192963	0.00386828	-5.10365	0.0362889	0.0797881	-0.4545	0.20325	-0.65775
ENSOCUG00000011860	ENSMUSG00000019979	MGI:1306796	Apaf1	1509	2012	1937	1696	1107	1381	1358	28	32.77	28.567	29.3	20.422	31.245	27.049	P	P	4.80733	5.0343	4.83628	4.89264	4.87284	4.35206	4.96555	4.7575	4.73699	0.45159	0.570409	0.466741	0.336529	0.119455	0.375174	0.288455	2.83168	0.0696439	0.125171	0.511	0.27975	0.23125
ENSOCUG00000013515	ENSMUSG00000024897	MGI:1860297	Apba1	1118	7195	1610	2082	1250	1041	1202	20.745	117.187	23.744	35.969	23.06	23.553	23.942	P	P	4.37466	6.87267	4.56951	5.27228	5.16867	4.52733	4.55781	4.58146	4.70882	0.225084	1.5328	0.327089	0.459839	0.192513	0.205218	0.215075	0.929419	0.520916	0.578749	0.879	0.26825	0.61075
ENSOCUG00000012437	ENSMUSG00000030519	MGI:1261791	Apba2	80	922	85	162	224	84	114	1.484	15.017	1.254	2.799	4.132	1.9	2.271	P	A	0.569886	3.90851	0.326058	1.60149	1.48477	2.04697	0.926372	1.18313	1.41031	-1.76673	-0.0189474	-1.89438	-1.07569	-0.841353	-1.30844	-1.20142	0.242683	0.847636	0.872861	-0.893	-1.1065	0.2135
ENSOCUG00000016929	ENSMUSG00000037032	MGI:107765	Apbb1	1148	2878	1088	1922	2697	1736	1541	21.301	46.875	16.046	33.205	49.755	39.277	30.694	P	P	4.41286	5.55074	4.00413	4.65591	5.05331	5.63676	5.29561	4.93989	5.23139	0.245084	0.840765	0.0311094	0.411754	0.654946	0.512747	0.364476	0.186969	0.880264	0.901013	0.543	0.486	0.057
ENSOCUG00000005845	ENSMUSG00000026786	MGI:1861354	Apbb1ip	568	877	899	1812	613	674	1241	10.539	14.284	13.258	31.304	11.309	15.249	24.719	P	P	3.3977	3.83632	3.72884	3.65429	4.96829	3.49936	3.93066	4.62752	4.25646	-0.286357	-0.0567391	-0.113004	0.376314	-0.235967	-0.0561918	0.234276	-1.39767	0.243461	0.31362	-0.1715	0.0795	-0.251
ENSOCUG00000016932	ENSMUSG00000029207	MGI:108405	Apbb2	2242	3522	3435	540	527	273	343	41.6	57.364	50.66	9.329	9.722	6.177	6.832	P	P	5.37853	5.84207	5.66276	5.62779	3.22174	3.28128	2.62681	2.7723	2.97553	0.750612	0.993277	0.89941	-0.351687	-0.326869	-0.599663	-0.53902	9.56562	0.018688	0.0502843	0.872	-0.4545	1.3265
ENSOCUG00000015620	ENSMUSG00000005871	MGI:88039	Apc	4508	7383	5017	4043	2677	1920	3544	83.646	120.249	73.991	69.847	49.386	43.44	70.59	P	P	6.38623	6.90988	6.20928	6.5018	6.12613	5.62602	5.44095	6.1414	5.83362	1.27815	1.55228	1.18551	0.858927	0.65047	0.573328	0.865292	4.35575	0.0700799	0.125676	1.415	0.73675	0.67825
ENSOCUG00000012217	ENSMUSG00000071847	MGI:3513977	Apcdd1	199	340	224	945	1223	690	972	3.692	5.538	3.304	16.326	22.562	15.611	19.361	A	P	1.88458	2.46928	1.72402	2.02596	4.02909	4.49583	3.96451	4.27505	4.19112	-1.07848	-0.772391	-1.16254	-0.0151637	0.179381	-0.0420833	0.087357	-6.06466	0.0731824	0.12997	-0.925	0.05225	-0.97725
ENSOCUG00000004990	ENSMUSG00000032590	MGI:88041	Apeh	866	1154	1041	1288	1051	762	798	16.069	18.796	15.353	22.252	19.389	17.24	15.895	P	P	4.00618	4.23232	3.94042	4.05964	4.47584	4.27716	4.1077	3.99048	4.2128	0.032183	0.150566	-0.00224221	0.17105	0.0882383	0.0176033	-0.0312568	0.405677	0.721497	0.761254	0.0915	0.0615	0.03
ENSOCUG00000005022	ENSMUSG00000035960	MGI:88042	Apex1	153	210	171	2779	2064	1692	2325	2.839	3.42	2.522	48.01	38.077	38.281	46.31	A	P	1.50535	1.77413	1.33452	1.538	5.58527	5.25084	5.25857	5.53325	5.40698	-1.27701	-1.1363	-1.36644	0.633485	0.494089	0.497309	0.611803	-22.185	0.00578467	0.0219908	-1.2065	0.559	-1.7655
ENSOCUG00000000570	ENSMUSG00000025269	MGI:1924872	Apex2	503	589	551	568	370	319	387	9.333	9.593	8.126	9.813	6.826	7.217	7.708	P	P	3.22237	3.26201	3.02258	3.16899	3.29467	2.771	2.85147	2.94643	2.96589	-0.378144	-0.357392	-0.482738	-0.321287	-0.539564	-0.506022	-0.466441	1.84021	0.15537	0.222117	-0.3675	-0.45825	0.09075
ENSOCUG00000009037	ENSMUSG00000015750	MGI:2385110	Aph1a	655	815	738	3563	2016	1850	1792	12.154	13.274	10.884	61.555	37.191	41.856	35.694	P	P	3.60331	3.73054	3.44414	3.59267	5.9438	5.2169	5.38736	5.15759	5.42641	-0.178722	-0.112114	-0.262045	0.782927	0.479939	0.550994	0.45522	-8.70266	0.00112627	0.00781014	-0.1455	0.56725	-0.71275
ENSOCUG00000004627	ENSMUSG00000032375	MGI:3522097	Aph1b	523	820	602	13932	6823	6854	7712	9.704	13.356	8.878	240.69	125.871	155.071	153.61	P	P	3.27862	3.73937	3.15029	3.38943	7.91103	6.97581	7.27679	7.26313	7.35669	-0.348696	-0.107494	-0.415881	1.60291	1.21309	1.33855	1.33285	-10.9343	0.00831168	0.0281014	-0.228	1.372	-1.6
ENSOCUG00000021141	ENSMUSG00000010911	MGI:1926788	Apip	262	320	294	550	555	475	559	4.861	5.212	4.336	9.502	10.239	10.747	11.134	A	P	2.28138	2.38182	2.11634	2.25985	3.24821	3.35596	3.42584	3.47694	3.37674	-0.870757	-0.818178	-0.957156	-0.340652	-0.295739	-0.266612	-0.245311	-16.5603	0.00188023	0.0103877	-0.8445	-0.28725	-0.55725
ENSOCUG00000006121	ENSMUSG00000030051	MGI:1919353	Aplf	204	238	231	1711	1507	1344	1736	3.785	3.876	3.407	29.559	27.801	30.408	34.578	A	P	1.92038	1.95471	1.76842	1.88117	4.88554	4.79708	4.92637	5.11179	4.9302	-1.05974	-1.04177	-1.1393	0.341824	0.304951	0.358843	0.436128	-48.6604	3.80231e-06	0.000640326	-1.051	0.3605	-1.4115
ENSOCUG00000006002	ENSMUSG00000006651	MGI:88046	Aplp1	338	1725	537	22	30	24	46	6.272	28.096	7.92	0.38	0.553	0.543	0.916	P	A	2.64884	4.81227	2.98545	3.48218	-1.39565	-0.853493	-0.880983	-0.126202	-0.814081	-0.678392	0.454173	-0.502176	-2.27631	-2.05033	-2.06179	-1.74718	3.33431	0.17149	0.23953	-0.112	-2.03375	1.92175
ENSOCUG00000010051	ENSMUSG00000031996	MGI:88047	Aplp2	13130	15729	13374	30040	30311	26116	30137	243.628	256.182	197.24	518.974	559.18	590.872	600.277	P	P	7.92854	8.00103	7.62381	7.85113	9.01952	9.12717	9.2067	9.22948	9.14572	2.08555	2.1235	1.92603	2.06495	2.10983	2.14298	2.15247	-0.456816	0.677857	0.721944	2.105	2.1175	-0.0125
ENSOCUG00000027493	ENSMUSG00000033096	MGI:1919131	Apmap	1129	1191	1003	676	456	448	395	20.949	19.398	14.792	11.679	8.412	10.136	7.868	P	P	4.38879	4.27785	3.88677	4.18447	3.5458	3.07251	3.34141	2.97595	3.23392	0.232479	0.174401	-0.0303274	-0.21661	-0.413888	-0.301804	-0.454137	8.9819	0.000864086	0.00666532	0.203	-0.34675	0.54975
ENSOCUG00000005329	ENSMUSG00000020609	MGI:88052	Apob	128	78	60	800	207	310	535	2.375	1.27	0.885	13.821	3.819	7.014	10.656	A	P	1.24796	0.345291	-0.176442	0.472269	3.78878	1.9331	2.81018	3.41363	2.98642	-1.41176	-1.88431	-2.15744	-0.115332	-0.888816	-0.523232	-0.2717	-4.12962	0.0495252	0.0982725	-1.648	-0.44975	-1.19825
ENSOCUG00000025736	ENSMUSG00000040613	MGI:103298	Apobec1	2566	5244	4185	132	27	94	107	47.612	85.41	61.721	2.28	0.498	2.127	2.131	P	A	5.57326	6.41634	5.94768	5.97909	1.18931	-1.0055	1.08864	1.0917	0.591041	0.852557	1.29391	1.04857	-1.19884	-2.11369	-1.2408	-1.23953	8.05928	0.00388998	0.0167054	1.0735	-1.4485	2.522
ENSOCUG00000023913	ENSMUSG00000009585	MGI:1933111	Apobec3	877	1438	1158	326	246	246	167	16.273	23.421	17.078	5.632	4.538	5.566	3.326	P	A	4.02439	4.54974	4.09409	4.22274	2.49365	2.18213	2.47657	1.73394	2.22157	0.0417159	0.316736	0.0782021	-0.655169	-0.785016	-0.662288	-0.971831	6.06911	0.0420248	0.0883648	0.1795	-0.7685	0.948
ENSOCUG00000013076	ENSMUSG00000042759	MGI:2176230	Apobr	398	553	531	1065	611	326	327	7.385	9.007	7.831	18.399	11.272	7.376	6.513	P	P	2.88458	3.17102	2.96924	3.00828	4.20156	3.49464	2.88278	2.70338	3.32059	-0.554978	-0.405025	-0.510662	0.0567243	-0.237932	-0.492969	-0.567747	-1.05899	0.349591	0.416863	-0.48	-0.3105	-0.1695
ENSOCUG00000024530	ENSMUSG00000040564	MGI:88053	Apoc1	116	123	74	1022	556	396	332	2.152	2.003	1.091	17.656	10.257	8.959	6.613	A	P	1.10594	1.0024	0.126121	0.744821	4.1421	3.35856	3.16341	2.72528	3.34734	-1.48611	-1.54031	-1.99904	0.0319408	-0.294656	-0.375997	-0.558622	-9.59723	0.00166293	0.00967426	-1.513	-0.2995	-1.2135
ENSOCUG00000023599	ENSMUSG00000022548	MGI:88056	Apod	2512	4867	1150	19268	24402	26305	41610	46.61	79.27	16.96	332.876	450.171	595.148	828.799	P	P	5.54258	6.30871	4.08409	5.31179	8.37884	8.81433	9.2171	9.69488	9.02629	0.836493	1.23756	0.0729664	1.7979	1.97943	2.14731	2.34646	-4.43061	0.0614425	0.114734	1.037	2.0675	-1.0305
ENSOCUG00000014006	ENSMUSG00000079508	MGI:1915566	Apoo	116	211	136	588	342	296	462	2.152	3.437	2.006	10.158	6.309	6.697	9.202	A	P	1.10594	1.78099	1.00413	1.29702	3.34459	2.65747	2.74351	3.20199	2.98689	-1.48611	-1.13271	-1.5394	-0.300477	-0.586885	-0.551022	-0.359919	-4.52529	0.0911613	0.152303	-1.3095	-0.4495	-0.86
ENSOCUG00000003369	ENSMUSG00000025525	MGI:1915367	Apool	289	300	307	1229	1078	961	1350	5.362	4.886	4.528	21.232	19.887	21.743	26.89	A	P	2.42288	2.28871	2.17876	2.29678	4.40819	4.31376	4.44245	4.74898	4.47834	-0.79668	-0.866921	-0.924478	0.142853	0.103492	0.157132	0.284902	-19.0602	0.00015731	0.00292896	-0.832	0.172	-1.004
ENSOCUG00000010587	ENSMUSG00000022892	MGI:88059	App	17225	22472	19125	43998	45445	37579	46219	319.611	366.008	282.056	760.113	838.374	850.221	920.603	P	P	8.32017	8.51573	8.13984	8.32525	9.57007	9.71145	9.73169	9.84643	9.71491	2.29058	2.39295	2.19617	2.29444	2.35337	2.3618	2.40963	-0.226541	0.848389	0.873442	2.342	2.35475	-0.01275
ENSOCUG00000009419	ENSMUSG00000018481	MGI:1914134	Appbp2	1608	2269	1825	3888	3158	3572	4628	29.837	36.956	26.915	67.169	58.259	80.816	92.182	P	P	4.89901	5.20773	4.75035	4.95236	6.06973	5.86441	6.33657	6.52641	6.19928	0.499582	0.661198	0.421757	0.83542	0.749837	0.946644	1.02577	-3.06291	0.0806176	0.138934	0.5805	0.8895	-0.309
ENSOCUG00000006823	ENSMUSG00000040760	MGI:1920243	Appl1	2240	2861	2264	2463	1779	1589	2363	41.563	46.598	33.39	42.551	32.819	35.951	47.067	P	P	5.37724	5.54219	5.06133	5.32692	5.41112	5.03647	5.16796	5.55664	5.29305	0.749938	0.836291	0.584555	0.560896	0.404732	0.459541	0.621552	4.31704	0.0179547	0.0487974	0.793	0.512	0.281
ENSOCUG00000005042	ENSMUSG00000020263	MGI:2384914	Appl2	1286	1701	1765	1141	946	783	995	23.862	27.705	26.03	19.712	17.452	17.715	19.819	P	P	4.57663	4.79206	4.70212	4.69027	4.301	4.12531	4.14692	4.30879	4.22051	0.330817	0.443592	0.39651	0.0981752	0.0249437	0.0339516	0.101421	5.3801	0.0796761	0.137804	0.3875	0.0645	0.323
ENSOCUG00000024322	ENSMUSG00000006589	MGI:88061	Aprt	641	1170	818	261	327	264	155	11.894	19.056	12.064	4.509	6.033	5.973	3.087	P	A	3.57214	4.25218	3.59262	3.80565	2.17283	2.59276	2.57845	1.62636	2.2426	-0.19504	0.160965	-0.184316	-0.788895	-0.613856	-0.619822	-1.01667	3.68437	0.0917489	0.152763	-0.017	-0.76	0.743
ENSOCUG00000022666	ENSMUSG00000004655	MGI:103201	Aqp1	10524	11744	12009	20494	25261	13184	17474	195.274	191.278	177.109	354.056	466.018	298.287	348.052	P	P	7.60935	7.57952	7.4685	7.55246	8.46783	8.86424	8.22056	8.44316	8.49895	1.91846	1.90284	1.84472	1.835	2.00023	1.73193	1.82471	1.11163	0.344849	0.412538	1.9105	1.848	0.0625
ENSOCUG00000003488	ENSMUSG00000040383	MGI:1276102	Aqr	1524	2012	1777	2018	1350	1268	2076	28.278	32.77	26.207	34.863	24.905	28.688	41.35	P	P	4.8216	5.0343	4.7119	4.85593	5.12363	4.63836	4.84239	5.36983	4.99355	0.459061	0.570409	0.401627	0.441064	0.238793	0.323839	0.543684	1.46897	0.224951	0.294575	0.5145	0.387	0.1275
ENSOCUG00000003142	ENSMUSG00000046532	MGI:88064	Ar	1226	939	1244	187	111	77	111	22.749	15.294	18.347	3.231	2.048	1.742	2.211	P	A	4.5077	3.93487	4.19744	4.21334	1.69181	1.03403	0.800842	1.14465	1.16784	0.294731	-0.00514867	0.132307	-0.98939	-1.26357	-1.36077	-1.21746	7.98287	0.028638	0.0675489	0.145	-1.20775	1.35275
ENSOCUG00000016449	ENSMUSG00000001127	MGI:88065	Araf	1845	2767	2225	2750	2467	1812	2307	34.234	45.067	32.814	47.509	45.511	40.996	45.951	P	P	5.09736	5.494	5.03626	5.20921	5.57014	5.50816	5.35742	5.52204	5.48944	0.603421	0.81106	0.571432	0.627177	0.601343	0.538513	0.607129	1.07358	0.468389	0.528173	0.707	0.5935	0.1135
ENSOCUG00000021605	ENSMUSG00000032812	MGI:1916960	Arap1	3858	4970	5345	6305	5056	2961	3283	71.585	80.948	78.828	108.926	93.274	66.992	65.392	P	P	6.1616	6.33892	6.30064	6.26705	6.7672	6.5434	6.06592	6.03104	6.35189	1.16055	1.25338	1.23334	1.12614	1.03285	0.833832	0.81929	2.87233	0.0454837	0.0930795	1.207	0.953	0.254
ENSOCUG00000015669	ENSMUSG00000037999	MGI:2684416	Arap2	1377	1475	1322	576	190	410	394	25.55	24.024	19.497	9.951	3.505	9.276	7.848	P	P	4.67527	4.58639	4.28517	4.51561	3.31484	1.80947	3.21354	2.97229	2.82754	0.382454	0.335924	0.178237	-0.312877	-0.940348	-0.355105	-0.455661	5.98075	0.0081491	0.0276575	0.359	-0.516	0.875
ENSOCUG00000009340	ENSMUSG00000024451	MGI:2147274	Arap3	791	1131	1258	1562	1947	1142	733	14.677	18.421	18.553	26.985	35.918	25.838	14.6	P	P	3.87549	4.20327	4.21358	4.09745	4.7541	5.16665	4.6914	3.86791	4.62001	-0.0362334	0.135361	0.140759	0.287035	0.458997	0.260902	-0.0823489	-1.28061	0.273883	0.343307	0.0495	0.23125	-0.18175
ENSOCUG00000010162	ENSMUSG00000032096	MGI:2387591	Arcn1	5411	6298	5502	11177	7944	8290	12844	100.402	102.577	81.144	193.095	146.552	187.56	255.83	P	P	6.64964	6.68057	6.34241	6.55754	7.59317	7.19527	7.55121	7.99904	7.58467	1.41604	1.43223	1.25521	1.47042	1.30457	1.45293	1.6396	-0.623112	0.576303	0.629642	1.424	1.467	-0.043
ENSOCUG00000014107	ENSMUSG00000042350	MGI:1915747	Arel1	1477	2802	1765	1973	1702	1307	1803	27.406	45.637	26.03	34.086	31.399	29.571	35.913	P	P	4.77641	5.51213	4.70212	4.99689	5.0911	4.97263	4.8861	5.16642	5.02906	0.435402	0.820553	0.39651	0.427503	0.378124	0.342056	0.4589	1.1618	0.447151	0.508885	0.628	0.40175	0.22625
ENSOCUG00000023645	ENSMUSG00000048076	MGI:99431	Arf1	5414	7065	6054	4954	3276	2558	3200	100.457	115.07	89.285	85.586	60.436	57.874	63.738	P	P	6.65044	6.84636	6.48034	6.65905	6.4193	5.91734	5.85486	5.99409	6.0464	1.41646	1.51903	1.32742	0.981126	0.771897	0.745854	0.803891	8.67628	0.00286772	0.0136269	1.4675	0.82575	0.64175
ENSOCUG00000023198	ENSMUSG00000062421	MGI:99595	Arf2	1154	1575	1164	224	160	103	118	21.413	25.652	17.167	3.87	2.952	2.33	2.35	P	A	4.42039	4.68102	4.10154	4.40098	1.95227	1.56154	1.22056	1.23288	1.49181	0.249021	0.385466	0.0821053	-0.880825	-1.04369	-1.18582	-1.18068	14.0396	0.000584251	0.00563015	0.317	-1.073	1.39
ENSOCUG00000024365	ENSMUSG00000020440	MGI:99434	Arf5	867	1442	1269	627	722	536	602	16.087	23.486	18.715	10.832	13.32	12.127	11.991	P	P	4.00785	4.55374	4.22614	4.26258	3.43724	3.73547	3.60014	3.58386	3.58918	0.0330546	0.318834	0.147334	-0.261859	-0.13755	-0.193958	-0.200747	2.58036	0.223191	0.292467	0.176	-0.19875	0.37475
ENSOCUG00000001692	ENSMUSG00000044147	MGI:99435	Arf6	1127	1467	1422	2521	1943	1530	2016	20.912	23.893	20.972	43.553	35.845	34.616	40.155	P	P	4.38623	4.57854	4.39037	4.45171	5.4447	5.16369	5.11337	5.32752	5.26232	0.23114	0.331816	0.233309	0.574893	0.45776	0.436788	0.526048	-3.64903	0.0761402	0.13354	0.2815	0.499	-0.2175
ENSOCUG00000006024	ENSMUSG00000027575	MGI:2183559	Arfgap1	1764	2033	2215	1117	1481	945	513	32.731	33.112	32.667	19.297	27.322	21.381	10.218	P	P	5.03259	5.04928	5.02976	5.03721	4.27033	4.77197	4.41823	3.35305	4.2034	0.569514	0.578251	0.56803	0.0853915	0.294485	0.147036	-0.296951	4.10067	0.0261382	0.0634771	0.574	0.05725	0.51675
ENSOCUG00000002073	ENSMUSG00000027255	MGI:1924288	Arfgap2	829	1011	969	1900	1741	1149	906	15.382	16.466	14.291	32.825	32.118	25.996	18.046	P	P	3.94319	4.04146	3.83702	3.94055	5.0367	5.00532	4.70022	4.1736	4.72896	-0.000795124	0.0506495	-0.0563733	0.404831	0.391748	0.264577	0.0450725	-2.88006	0.0526021	0.102619	0.025	0.27675	-0.25175
ENSOCUG00000015867	ENSMUSG00000067851	MGI:2442988	Arfgef1	3152	4855	3920	2342	1490	1209	2148	58.486	79.075	57.812	40.461	27.488	27.353	42.784	P	P	5.87001	6.30514	5.85331	6.00949	5.33845	4.78071	4.77365	5.41901	5.07796	1.0079	1.2357	0.99916	0.530603	0.298129	0.295186	0.564186	5.1757	0.0403131	0.0858418	1.122	0.422	0.7
ENSOCUG00000005446	ENSMUSG00000074582	MGI:2139354	Arfgef2	2671	4507	3672	1998	1289	924	1399	49.561	73.407	54.155	34.518	23.78	20.905	27.866	P	P	5.63112	6.19784	5.75902	5.86266	5.10926	4.57165	4.3858	4.80042	4.71678	0.882846	1.17953	0.9498	0.435074	0.210988	0.133522	0.306342	4.68996	0.0803193	0.138547	1.0315	0.2715	0.76
ENSOCUG00000004754	ENSMUSG00000019852	MGI:106387	Arfgef3	375	4358	571	291	240	94	196	6.958	70.98	8.421	5.027	4.428	2.127	3.904	P	A	2.7987	6.14934	3.07401	4.00735	2.3298	2.14651	1.08864	1.96495	1.88247	-0.599936	1.15413	-0.45581	-0.723466	-0.799865	-1.2408	-0.875543	1.34205	0.40218	0.467273	0.277	-0.91	1.187
ENSOCUG00000014132	ENSMUSG00000074513	MGI:1277120	Arfip1	302	396	397	1287	723	685	1220	5.604	6.45	5.855	22.234	13.338	15.498	24.3	P	P	2.48636	2.68925	2.54966	2.57509	4.47472	3.73747	3.95402	4.6029	4.19228	-0.763448	-0.657238	-0.73031	0.170583	-0.136718	-0.0464567	0.224013	-7.54331	0.00167577	0.00971987	-0.71	0.053	-0.763
ENSOCUG00000016950	ENSMUSG00000030881	MGI:1924182	Arfip2	1030	1430	1187	890	691	602	612	19.112	23.291	17.506	15.376	12.748	13.62	12.19	P	P	4.25639	4.54169	4.12977	4.30928	3.94258	3.67216	3.76767	3.60762	3.74751	0.163167	0.312523	0.0968832	-0.0512225	-0.163941	-0.124127	-0.19084	4.57707	0.0885928	0.148968	0.238	-0.1325	0.3705
ENSOCUG00000000584	ENSMUSG00000021125	MGI:1330806	Arg2	28	114	40	452	525	349	449	0.52	1.857	0.59	7.809	9.685	7.896	8.943	A	P	-0.944687	0.892779	-0.761404	-0.271104	2.9651	3.27579	2.98114	3.16081	3.09571	-2.55962	-1.5977	-2.46367	-0.458658	-0.329156	-0.451973	-0.377082	-3.47451	0.176748	0.245114	-2.079	-0.40425	-1.67475
ENSOCUG00000007585	ENSMUSG00000040459	MGI:2442985	Arglu1	2275	2594	2697	2245	2402	1844	1977	42.213	42.249	39.775	38.785	44.312	41.72	39.378	P	P	5.39961	5.40085	5.31381	5.37142	5.27742	5.46964	5.38268	5.29933	5.35727	0.761648	0.762298	0.716731	0.505167	0.585287	0.54904	0.514301	12.2633	0.00116774	0.00798432	0.762	0.53825	0.22375
ENSOCUG00000016160	ENSMUSG00000027247	MGI:2445003	Arhgap1	1359	1775	1552	6336	6711	4658	5683	25.216	28.91	22.889	109.461	123.805	105.387	113.196	P	P	4.65629	4.85349	4.51658	4.67545	6.77428	6.95193	6.71955	6.82267	6.81711	0.372516	0.475754	0.299379	1.12909	1.20314	1.10628	1.14926	-13.012	0.0226453	0.0573577	0.4245	1.14675	-0.72225
ENSOCUG00000003124	ENSMUSG00000037148	MGI:1925764	Arhgap10	1172	1206	1497	2420	1839	1547	1894	21.747	19.642	22.078	41.808	33.926	35.001	37.725	P	P	4.44271	4.2959	4.46453	4.40105	5.38571	5.08432	5.12931	5.23746	5.2092	0.26071	0.183853	0.272128	0.550305	0.424679	0.443432	0.488509	-5.34821	0.0289757	0.0681283	0.2225	0.47675	-0.25425
ENSOCUG00000009489	ENSMUSG00000041219	MGI:2444300	Arhgap11a	405	566	505	444	183	291	385	7.515	9.219	7.448	7.671	3.376	6.584	7.669	P	P	2.90974	3.20455	2.89681	3.0037	2.93934	1.75532	2.71893	2.93895	2.58813	-0.54181	-0.387476	-0.548579	-0.469397	-0.962922	-0.561267	-0.469557	1.07301	0.344506	0.41223	-0.4645	-0.61575	0.15125
ENSOCUG00000015950	ENSMUSG00000041225	MGI:1922665	Arhgap12	1894	2598	1974	3659	3310	2749	3335	35.143	42.314	29.113	63.213	61.063	62.196	66.427	P	P	5.13518	5.40307	4.86357	5.13394	5.98215	5.93223	5.95875	6.05371	5.98171	0.623218	0.763462	0.481032	0.798915	0.778106	0.789158	0.82874	-1.49254	0.367515	0.434946	0.693	0.79875	-0.10575
ENSOCUG00000000471	ENSMUSG00000049744	MGI:1923367	Arhgap15	486	702	653	679	246	296	540	9.018	11.434	9.63	11.73	4.538	6.697	10.756	P	P	3.17277	3.51522	3.26761	3.31853	3.55219	2.18213	2.74351	3.42705	2.97622	-0.404111	-0.224839	-0.354464	-0.213947	-0.785016	-0.551022	-0.266106	0.87069	0.434	0.496475	-0.3145	-0.454	0.1395
ENSOCUG00000006925	ENSMUSG00000030766	MGI:1917747	Arhgap17	1317	1878	1937	4215	3255	1943	2807	24.437	30.587	28.567	72.819	60.049	43.96	55.911	P	P	4.611	4.93487	4.83628	4.79405	6.18624	5.90806	5.45813	5.80505	5.83937	0.348807	0.518355	0.466741	0.883981	0.76803	0.580489	0.725094	-2.90395	0.0909102	0.151965	0.4335	0.73925	-0.30575
ENSOCUG00000009450	ENSMUSG00000039031	MGI:1921160	Arhgap18	932	1144	1125	2364	782	1028	1335	17.293	18.633	16.592	40.841	14.426	23.258	26.591	P	P	4.11214	4.21976	4.05238	4.12809	5.35193	3.85064	4.53968	4.73286	4.61878	0.087655	0.143992	0.0563666	0.536226	-0.0895452	0.197661	0.278183	-0.868083	0.444414	0.50648	0.116	0.2305	-0.1145
ENSOCUG00000021497	ENSMUSG00000025154	MGI:1918335	Arhgap19	878	1399	1381	476	247	306	266	16.291	22.786	20.367	8.223	4.557	6.923	5.298	P	P	4.02603	4.51007	4.34817	4.29476	3.03974	2.18798	2.79144	2.40552	2.60617	0.0425766	0.29597	0.211213	-0.427547	-0.782577	-0.531042	-0.691903	5.20563	0.0410304	0.0868425	0.1695	-0.6085	0.778
ENSOCUG00000013948	ENSMUSG00000053199	MGI:2445175	Arhgap20	800	429	649	2227	1012	1365	1806	14.844	6.987	9.571	38.474	18.669	30.883	35.972	P	P	3.89181	2.80472	3.25874	3.31843	5.26581	4.22261	4.94874	5.16882	4.90149	-0.0276886	-0.596785	-0.359104	0.500326	0.0654993	0.368166	0.459899	-2.19497	0.230827	0.300406	-0.3125	0.34825	-0.66075
ENSOCUG00000002720	ENSMUSG00000036591	MGI:1918685	Arhgap21	2205	2958	2929	1043	847	573	840	40.914	48.178	43.197	18.019	15.626	12.964	16.731	P	P	5.35452	5.59029	5.43286	5.45923	4.17144	3.96583	3.69645	4.06448	3.97455	0.738044	0.861473	0.779055	0.044172	-0.0415302	-0.153817	-0.000411784	11.206	0.00749819	0.0261228	0.7995	-0.038	0.8375
ENSOCUG00000009555	ENSMUSG00000063506	MGI:2443418	Arhgap22	258	594	342	773	668	643	523	4.787	9.675	5.044	13.354	12.323	14.548	10.417	P	P	2.25918	3.27421	2.33452	2.62264	3.73924	3.62332	3.86273	3.3809	3.65155	-0.882376	-0.351008	-0.842938	-0.135978	-0.184297	-0.0845064	-0.285342	-1.6512	0.337562	0.405366	-0.6165	-0.1725	-0.444
ENSOCUG00000011758	ENSMUSG00000049807	MGI:3697726	Arhgap23	1384	1777	1870	691	854	569	517	25.68	28.942	27.579	11.938	15.755	12.874	10.298	P	P	4.68259	4.85512	4.78549	4.7744	3.57746	3.97771	3.68634	3.36426	3.65144	0.386284	0.476604	0.440154	-0.203412	-0.0365808	-0.15803	-0.292281	8.64151	0.0018764	0.0103821	0.4315	-0.1725	0.604
ENSOCUG00000010654	ENSMUSG00000057315	MGI:1922647	Arhgap24	1615	1887	2391	2189	1401	1054	1675	29.966	30.734	35.263	37.817	25.846	23.847	33.363	P	P	4.90528	4.94177	5.14007	4.9957	5.24098	4.69186	4.57571	5.06018	4.89218	0.502863	0.521966	0.625776	0.489976	0.261092	0.212681	0.414617	2.56095	0.0798008	0.137914	0.5125	0.34475	0.16775
ENSOCUG00000010212	ENSMUSG00000030047	MGI:2443687	Arhgap25	872	1130	1362	2603	1216	1139	1302	16.18	18.405	20.087	44.97	22.433	25.77	25.934	P	P	4.01614	4.202	4.32818	4.18211	5.49088	4.48754	4.68761	4.69675	4.8407	0.0373977	0.134693	0.20075	0.594141	0.175929	0.25932	0.263131	-2.2635	0.0866878	0.146493	0.086	0.323	-0.237
ENSOCUG00000011665	ENSMUSG00000036452	MGI:1918552	Arhgap26	843	3847	1110	152	62	56	74	15.642	62.657	16.37	2.626	1.144	1.267	1.474	P	A	3.96735	5.96941	4.03301	4.65659	1.39285	0.193813	0.34141	0.55969	0.62194	0.011853	1.05994	0.0462288	-1.11401	-1.61379	-1.55227	-1.46128	3.67941	0.152215	0.218958	0.536	-1.43525	1.97125
ENSOCUG00000001336	ENSMUSG00000034255	MGI:1916903	Arhgap27	272	495	354	1079	789	459	452	5.047	8.062	5.221	18.641	14.556	10.385	9.003	P	P	2.33542	3.01117	2.38427	2.57696	4.2204	3.8635	3.37641	3.17042	3.65768	-0.842467	-0.488708	-0.816892	0.0645778	-0.0841863	-0.287217	-0.373078	-2.44996	0.157935	0.224958	-0.6655	-0.16975	-0.49575
ENSOCUG00000003323	ENSMUSG00000024043	MGI:2147003	Arhgap28	214	676	278	182	130	285	236	3.971	11.01	4.1	3.144	2.398	6.448	4.701	P	A	1.98942	3.46077	2.03561	2.49527	1.65271	1.26198	2.68887	2.23288	1.95911	-1.0236	-0.253343	-0.99942	-1.00569	-1.16855	-0.573795	-0.763863	0.588768	0.645114	0.69322	-0.6385	-0.87825	0.23975
ENSOCUG00000009819	ENSMUSG00000039831	MGI:2443818	Arhgap29	2874	2709	3111	1528	822	1438	1396	53.327	44.122	45.881	26.398	15.164	32.535	27.806	P	P	5.7368	5.46343	5.51983	5.57336	4.72235	3.92261	5.0239	4.79732	4.61655	0.93817	0.79506	0.824584	0.273801	-0.0595467	0.399495	0.305051	5.17858	0.00737651	0.0259124	0.8665	0.2295	0.637
ENSOCUG00000002358	ENSMUSG00000048865	MGI:2684948	Arhgap30	1748	2848	2454	7230	3681	2975	3510	32.434	46.386	36.192	124.906	67.907	67.309	69.913	P	P	5.01945	5.53562	5.17759	5.24422	6.9647	6.0855	6.07273	6.12749	6.3126	0.562632	0.832851	0.645419	1.20846	0.841991	0.836669	0.859495	-1.46683	0.281835	0.350968	0.698	0.9365	-0.2385
ENSOCUG00000009478	ENSMUSG00000022799	MGI:1333857	Arhgap31	2148	2861	3223	680	378	274	354	39.856	46.598	47.533	11.748	6.973	6.199	7.051	P	P	5.31674	5.54219	5.57086	5.47659	3.55431	2.80186	2.63209	2.81784	2.95152	0.718264	0.836291	0.851297	-0.213062	-0.5267	-0.597465	-0.520038	11.9455	0.000328727	0.00421177	0.777	-0.46425	1.24125
ENSOCUG00000025278	ENSMUSG00000041444	MGI:2450166	Arhgap32	1352	1602	1346	592	467	264	305	25.086	26.092	19.851	10.227	8.615	5.973	6.075	P	P	4.64884	4.70555	4.31113	4.55517	3.35437	3.1069	2.57845	2.6029	2.91065	0.368616	0.398304	0.191825	-0.2964	-0.399555	-0.619822	-0.60963	10.6427	0.00134316	0.00859537	0.3835	-0.4815	0.865
ENSOCUG00000017126	ENSMUSG00000058230	MGI:1929494	Arhgap35	4267	6698	4661	2020	1437	971	1344	79.175	109.092	68.741	34.898	26.51	21.969	26.77	P	P	6.30696	6.7694	6.10309	6.39315	5.12506	4.72846	4.45738	4.74255	4.76336	1.23665	1.47874	1.12992	0.44166	0.276349	0.163358	0.282223	7.9699	0.0344693	0.0769881	1.358	0.29075	1.06725
ENSOCUG00000002652	ENSMUSG00000033697	MGI:107858	Arhgap39	406	800	591	212	210	143	120	7.533	13.03	8.716	3.663	3.874	3.235	2.39	P	A	2.91329	3.70374	3.12368	3.24691	1.87284	1.95386	1.69393	1.25713	1.69444	-0.539948	-0.126144	-0.429809	-0.913935	-0.880163	-0.98851	-1.17058	3.02141	0.168495	0.236433	-0.333	-0.9885	0.6555
ENSOCUG00000001107	ENSMUSG00000031389	MGI:2159577	Arhgap4	296	528	525	1372	990	735	528	5.492	8.6	7.743	23.703	18.264	16.629	10.517	P	P	2.45741	3.10428	2.95284	2.83818	4.56698	4.1909	4.05566	3.39463	4.05204	-0.778604	-0.439964	-0.519245	0.209042	0.0522824	-0.00409089	-0.27962	-3.05254	0.106986	0.16955	-0.6095	-0.00575	-0.60375
ENSOCUG00000006927	ENSMUSG00000050730	MGI:1918794	Arhgap42	573	890	707	384	323	235	448	10.632	14.496	10.427	6.634	5.959	5.317	8.923	P	P	3.41035	3.85755	3.38223	3.55004	2.72988	2.57501	2.41057	3.15759	2.71826	-0.279737	-0.0456259	-0.294456	-0.556701	-0.621257	-0.689797	-0.378423	2.9565	0.118233	0.182056	-0.163	-0.5615	0.3985
ENSOCUG00000003519	ENSMUSG00000033389	MGI:2144423	Arhgap44	855	1256	897	80	94	73	118	15.865	20.457	13.229	1.382	1.734	1.652	2.35	P	A	3.98774	4.35451	3.72563	4.02263	0.466848	0.794205	0.72388	1.23288	0.804453	0.0225282	0.214534	-0.114686	-1.49998	-1.36353	-1.39285	-1.18068	12.6727	0.00585539	0.0221509	0.119	-1.3595	1.4785
ENSOCUG00000010548	ENSMUSG00000035133	MGI:1332637	Arhgap5	3421	4179	3178	3307	2844	2632	3266	63.477	68.064	46.869	57.132	52.466	59.549	65.053	P	P	5.98816	6.08883	5.55057	5.87585	5.83623	5.71332	5.896	6.02355	5.86727	1.06976	1.12246	0.840677	0.73809	0.68686	0.763004	0.816168	9.23537	0.002371	0.0121001	1.096	0.751	0.345
ENSOCUG00000022807	ENSMUSG00000040345	MGI:2143764	Arhgap9	499	745	713	309	187	168	171	9.259	12.134	10.515	5.338	3.45	3.801	3.406	P	A	3.21085	3.60099	3.39443	3.40209	2.41638	1.78651	1.92637	1.76809	1.97434	-0.384174	-0.179939	-0.288073	-0.687375	-0.949919	-0.891622	-0.957598	4.91241	0.0465472	0.0945623	-0.282	-0.87175	0.58975
ENSOCUG00000006010	ENSMUSG00000030220	MGI:101940	Arhgdib	1226	1762	1545	6195	2854	2452	5541	22.749	28.698	22.786	107.025	52.651	55.476	110.367	P	P	4.5077	4.84289	4.51006	4.62022	6.74181	5.71839	5.7938	6.78617	6.26004	0.294731	0.470202	0.295965	1.11556	0.688971	0.720404	1.13404	-3.55269	0.0255116	0.0623808	0.3825	0.91475	-0.53225
ENSOCUG00000007750	ENSMUSG00000040940	MGI:1353510	Arhgef1	2286	2791	3661	2129	2046	1404	1180	42.417	45.458	53.993	36.781	37.745	31.765	23.504	P	P	5.40657	5.50645	5.75469	5.5559	5.20088	5.23821	4.98938	4.55481	4.99582	0.765291	0.817582	0.947534	0.473263	0.488822	0.385106	0.203966	5.72336	0.00554816	0.0214239	0.7915	0.38775	0.40375
ENSOCUG00000023182	ENSMUSG00000040964	MGI:1920004	Arhgef10l	2548	2639	3317	3823	5001	2983	2377	47.278	42.982	48.919	66.046	92.259	67.49	47.346	P	P	5.56311	5.42566	5.61233	5.5337	6.04541	6.52762	6.0766	5.56516	6.0537	0.84724	0.775288	0.873009	0.825281	1.02628	0.838283	0.625104	-0.195582	0.854846	0.878973	0.811	0.8285	-0.0175
ENSOCUG00000010731	ENSMUSG00000041977	MGI:2441869	Arhgef11	2087	3374	2810	2389	1945	1248	1632	38.724	54.953	41.442	41.273	35.882	28.236	32.507	P	P	5.27517	5.78013	5.37302	5.47611	5.36711	5.16517	4.81946	5.02266	5.0936	0.696505	0.960854	0.74773	0.542552	0.458379	0.314278	0.398978	2.84954	0.169074	0.236903	0.829	0.4285	0.4005
ENSOCUG00000005196	ENSMUSG00000059495	MGI:1916882	Arhgef12	10885	11734	12063	2004	1534	993	1703	201.972	191.115	177.906	34.621	28.299	22.467	33.921	P	P	7.65801	7.5783	7.47497	7.57043	5.11359	4.8227	4.4897	5.0841	4.87752	1.94393	1.9022	1.84811	0.436878	0.315629	0.17683	0.424586	24.7759	3.6533e-05	0.00163008	1.923	0.33875	1.58425
ENSOCUG00000010844	ENSMUSG00000052921	MGI:3045246	Arhgef15	497	662	781	457	310	361	256	9.222	10.782	11.518	7.895	5.719	8.168	5.099	P	P	3.20506	3.43058	3.52585	3.38716	2.98097	2.51574	3.02991	2.35024	2.71921	-0.387207	-0.269149	-0.219274	-0.452043	-0.64596	-0.431644	-0.714946	2.5395	0.0727189	0.129288	-0.328	-0.56125	0.23325
ENSOCUG00000029716	ENSMUSG00000032875	MGI:2673002	Arhgef17	6738	7410	8668	2914	5568	2428	2511	125.024	120.689	127.836	50.343	102.719	54.933	50.015	P	P	6.96606	6.91515	6.99815	6.95979	5.65371	6.68256	5.77961	5.64428	5.94004	1.58169	1.55504	1.59849	0.66201	1.09086	0.714489	0.658083	7.50427	0.0043779	0.0181905	1.5685	0.78125	0.78725
ENSOCUG00000023000	ENSMUSG00000028919	MGI:1925912	Arhgef19	357	422	545	92	60	26	42	6.624	6.873	8.038	1.589	1.107	0.588	0.837	P	A	2.72774	2.78099	3.00678	2.8385	0.668482	0.146507	-0.765505	-0.257446	-0.0519906	-0.637087	-0.609211	-0.491007	-1.41594	-1.63351	-2.01365	-1.80188	8.57208	0.00304512	0.0141881	-0.623	-1.7165	1.0935
ENSOCUG00000001937	ENSMUSG00000028059	MGI:103264	Arhgef2	5489	5578	6474	3830	3060	2266	2487	101.849	90.85	95.479	66.167	56.451	51.268	49.537	P	P	6.67029	6.50542	6.57711	6.58427	6.04805	5.81893	5.67999	5.63043	5.79435	1.42685	1.34054	1.37807	0.826381	0.730881	0.672965	0.652308	11.4384	0.00228206	0.0117759	1.384	0.7205	0.6635
ENSOCUG00000014113	ENSMUSG00000019467	MGI:1277173	Arhgef25	2322	2397	2807	2759	5062	2442	1983	43.085	39.041	41.398	47.665	93.384	55.25	39.498	P	P	5.42911	5.2869	5.37148	5.3625	5.57485	6.54511	5.7879	5.30371	5.80289	0.777092	0.702646	0.746923	0.629142	1.03357	0.717947	0.516123	0.134376	0.900334	0.918367	0.74	0.72425	0.01575
ENSOCUG00000001179	ENSMUSG00000036885	MGI:1918053	Arhgef26	87	156	94	1093	1365	817	1027	1.614	2.541	1.386	18.883	25.182	18.485	20.456	A	P	0.690901	1.34529	0.471256	0.835816	4.239	4.6543	4.20825	4.35446	4.364	-1.70338	-1.3608	-1.81836	0.0723301	0.245438	0.0595126	0.120456	-9.40246	0.0524669	0.102438	-1.532	0.12425	-1.65625
ENSOCUG00000000629	ENSMUSG00000021662	MGI:1346016	Arhgef28	810	3177	1090	315	498	352	276	15.03	51.745	16.075	5.442	9.187	7.964	5.497	P	P	3.90974	5.69334	4.00678	4.53662	2.44413	3.19962	2.99349	2.45876	2.774	-0.0183064	0.915416	0.0324965	-0.67581	-0.360906	-0.446826	-0.669711	2.0856	0.273602	0.343122	0.4485	-0.5385	0.987
ENSOCUG00000013280	ENSMUSG00000021895	MGI:1918954	Arhgef3	1242	1779	1401	1413	672	975	1268	23.045	28.975	20.662	24.411	12.397	22.059	25.256	P	P	4.52641	4.85674	4.36891	4.58402	4.60947	3.63193	4.46331	4.65858	4.34082	0.304523	0.477454	0.222072	0.226749	-0.180707	0.16583	0.247219	2.09356	0.115676	0.179483	0.391	0.11475	0.27625
ENSOCUG00000009914	ENSMUSG00000004562	MGI:2685515	Arhgef40	3074	3354	3672	4328	5466	3423	2985	57.038	54.627	54.155	74.771	100.837	77.445	59.456	P	P	5.83386	5.77156	5.75902	5.78814	6.2244	6.65589	6.2751	5.89375	6.26229	0.98898	0.956364	0.9498	0.89989	1.07974	0.921021	0.762067	0.84473	0.454244	0.515241	0.9725	0.91575	0.05675
ENSOCUG00000025879	ENSMUSG00000033542	MGI:1858952	Arhgef5	1185	1203	1401	367	356	257	384	21.988	19.594	20.662	6.34	6.568	5.815	7.649	P	P	4.45863	4.29231	4.36891	4.37328	2.66456	2.71535	2.53968	2.9352	2.7137	0.269041	0.181972	0.222072	-0.583931	-0.562759	-0.635982	-0.471121	14.2206	0.00252196	0.0125801	0.2255	-0.5635	0.789
ENSOCUG00000000255	ENSMUSG00000031133	MGI:1920591	Arhgef6	1866	2056	1996	3908	2611	2496	4066	34.624	33.487	29.437	67.515	48.168	56.472	80.988	P	P	5.11369	5.06551	4.87956	5.01959	6.07713	5.59	5.81946	6.33963	5.95656	0.611969	0.586748	0.489402	0.838505	0.635458	0.731099	0.947919	-2.74509	0.0661697	0.120961	0.5995	0.78825	-0.18875
ENSOCUG00000011267	ENSMUSG00000025656	MGI:2442233	Arhgef9	409	936	413	549	545	345	581	7.589	15.245	6.091	9.485	10.054	7.806	11.573	P	P	2.92391	3.93025	2.60667	3.15361	3.24558	3.32973	2.96451	3.53263	3.26811	-0.534388	-0.00756549	-0.700469	-0.341747	-0.306673	-0.458905	-0.222099	0.229866	0.854219	0.878422	-0.271	-0.3325	0.0615
ENSOCUG00000005314	ENSMUSG00000007880	MGI:1935147	Arid1a	2783	3900	3792	4373	3299	2481	3438	51.639	63.52	55.925	75.548	60.86	56.132	68.479	P	P	5.69038	5.98915	5.80541	5.82831	6.23933	5.92743	5.81076	6.09759	6.01878	0.913869	1.07027	0.974087	0.90611	0.776105	0.727475	0.847031	2.03763	0.215144	0.284257	0.992	0.814	0.178
ENSOCUG00000008879	ENSMUSG00000069729	MGI:1926129	Arid1b	2720	3134	3364	3599	3112	2050	2492	50.47	51.044	49.612	62.177	57.41	46.381	49.636	P	P	5.65735	5.67368	5.63263	5.65455	5.9583	5.84324	5.53546	5.63332	5.74258	0.896576	0.905124	0.883635	0.788972	0.741014	0.612725	0.653515	5.00779	0.0146259	0.0420781	0.901	0.69925	0.20175
ENSOCUG00000013306	ENSMUSG00000033237	MGI:1924294	Arid2	2332	2947	3000	1714	1138	793	1451	43.27	47.999	44.244	29.611	20.994	17.942	28.901	P	P	5.43531	5.58492	5.46741	5.49588	4.88807	4.3919	4.16523	4.85307	4.57457	0.780338	0.858659	0.797144	0.342878	0.136064	0.041583	0.328288	7.25735	0.00194326	0.0105822	0.8195	0.21225	0.60725
ENSOCUG00000001052	ENSMUSG00000048118	MGI:2444354	Arid4a	1338	1960	1735	2165	1886	1810	1817	24.827	31.923	25.588	37.403	34.793	40.951	36.192	P	P	4.63382	4.99653	4.67739	4.76924	5.22507	5.12073	5.35583	5.17758	5.2198	0.360755	0.550633	0.383562	0.483347	0.439855	0.537849	0.463551	-0.259604	0.835296	0.862885	0.456	0.48125	-0.02525
ENSOCUG00000006605	ENSMUSG00000039219	MGI:2137512	Arid4b	2146	2794	2516	2303	2185	2163	2050	39.819	45.507	37.106	39.787	40.309	48.938	40.832	P	P	5.31539	5.508	5.21358	5.34566	5.31422	5.33303	5.61287	5.35164	5.40294	0.71756	0.818394	0.664263	0.520505	0.528348	0.644991	0.536105	3.63142	0.0837373	0.142678	0.768	0.5575	0.2105
ENSOCUG00000012101	ENSMUSG00000037447	MGI:2443039	Arid5a	1322	1984	1891	1226	3432	2321	1189	24.53	32.314	27.889	21.18	63.314	52.512	23.683	P	P	4.61646	5.01408	4.8016	4.81072	4.40466	5.98445	5.71459	4.56577	5.16737	0.351669	0.559825	0.448589	0.141383	0.799872	0.687387	0.208536	-0.0165693	0.987578	0.989511	0.456	0.45925	-0.00325
ENSOCUG00000027029	ENSMUSG00000019947	MGI:2175912	Arid5b	4110	6227	5267	5189	7355	6360	6835	76.261	101.421	77.678	89.646	135.686	143.894	136.141	P	P	6.25288	6.66421	6.27943	6.39884	6.48616	7.08413	7.16887	7.08896	6.95703	1.20834	1.42367	1.22224	1.009	1.25824	1.29356	1.26026	0.875239	0.482376	0.54131	1.316	1.20525	0.11075
ENSOCUG00000011272	ENSMUSG00000025234	MGI:1344363	Arih1	3310	4333	3735	2013	1379	1285	2070	61.417	70.573	55.084	34.777	25.44	29.073	41.231	P	P	5.94057	6.14104	5.78356	5.95506	5.12005	4.66902	4.86161	5.36565	5.00408	1.04485	1.14979	0.962648	0.439572	0.251574	0.331847	0.541944	8.58902	0.00173032	0.00989467	1.0975	0.3915	0.706
ENSOCUG00000017699	ENSMUSG00000064145	MGI:1344361	Arih2	1305	1741	1559	1080	788	583	1209	24.214	28.356	22.992	18.658	14.537	13.19	24.081	P	P	4.59779	4.82559	4.52307	4.64882	4.22174	3.86167	3.72141	4.58984	4.09866	0.341894	0.461146	0.302778	0.0651349	-0.0849489	-0.143413	0.218567	3.85007	0.0201404	0.0527905	0.4015	0.014	0.3875
ENSOCUG00000002217	ENSMUSG00000060904	MGI:99436	Arl1	2629	3126	2643	1469	980	942	1483	48.781	50.914	38.979	25.379	18.079	21.313	29.539	P	P	5.60826	5.66999	5.28463	5.52096	4.66554	4.17625	4.41364	4.88454	4.53499	0.870876	0.903194	0.701455	0.250121	0.0461773	0.145124	0.341406	10.4932	0.00112254	0.00781014	0.887	0.1955	0.6915
ENSOCUG00000016961	ENSMUSG00000025870	MGI:1930788	Arl10	270	437	307	175	141	118	85	5.01	7.118	4.528	3.023	2.601	2.67	1.693	P	A	2.32477	2.83138	2.17876	2.44497	1.59613	1.37917	1.4167	0.759627	1.28791	-0.848041	-0.582831	-0.924478	-1.02927	-1.11971	-1.10406	-1.37795	2.89481	0.121615	0.185502	-0.7155	-1.15775	0.44225
ENSOCUG00000003013	ENSMUSG00000043157	MGI:2444054	Arl11	253	347	377	494	401	209	237	4.694	5.652	5.56	8.534	7.398	4.729	4.721	P	P	2.23095	2.49868	2.47509	2.40157	3.09329	2.88707	2.24141	2.23898	2.61519	-0.897157	-0.757	-0.76935	-0.405227	-0.49118	-0.760306	-0.76132	-1.92814	0.131274	0.196749	-0.827	-0.60425	-0.22275
ENSOCUG00000025555	ENSMUSG00000022911	MGI:1915396	Arl13b	749	903	785	1219	843	1177	1055	13.898	14.707	11.577	21.06	15.552	26.63	21.014	P	P	3.79678	3.87847	3.53322	3.73616	4.3964	3.95901	4.73495	4.39326	4.37091	-0.0774395	-0.0346739	-0.215416	0.13794	-0.0443768	0.279055	0.136631	-2.64271	0.0654024	0.119987	-0.056	0.1275	-0.1835
ENSOCUG00000027628	ENSMUSG00000027122	MGI:1926020	Arl14ep	867	1013	955	1635	1215	1381	1700	16.087	16.499	14.084	28.246	22.414	31.245	33.861	P	P	4.00785	4.04431	3.81602	3.95606	4.81999	4.48636	4.96555	5.08156	4.83836	0.0330546	0.0521421	-0.0673648	0.314502	0.175435	0.375174	0.423526	-5.1108	0.0125525	0.0379306	0.0425	0.32225	-0.27975
ENSOCUG00000008448	ENSMUSG00000042348	MGI:2442308	Arl15	457	633	523	203	111	107	171	8.48	10.31	7.713	3.507	2.048	2.421	3.406	P	A	3.08401	3.36595	2.94733	3.13243	1.81026	1.03403	1.27552	1.76809	1.47197	-0.450578	-0.30298	-0.522127	-0.940021	-1.26357	-1.16291	-0.957598	6.49843	0.00604627	0.0226492	-0.377	-1.08125	0.70425
ENSOCUG00000023477	ENSMUSG00000024944	MGI:1928393	Arl2	324	518	507	1777	2229	1327	1141	6.012	8.437	7.477	30.7	41.121	30.023	22.727	P	P	2.58781	3.0767	2.90251	2.85567	4.94015	5.3618	4.90801	4.50632	4.92907	-0.710341	-0.454406	-0.545594	0.364585	0.540337	0.351188	0.183756	-6.39852	0.0351016	0.0778831	-0.582	0.36	-0.942
ENSOCUG00000000582	ENSMUSG00000031776	MGI:1349429	Arl2bp	817	1365	853	2724	2022	1865	1958	15.159	22.232	12.58	47.06	37.302	42.195	39	P	P	3.92215	4.47457	3.65307	4.0166	5.55643	5.22118	5.39901	5.2854	5.36551	-0.0118076	0.277388	-0.152672	0.621464	0.481726	0.55585	0.508494	-2.77097	0.20345	0.272841	0.1325	0.54175	-0.40925
ENSOCUG00000005792	ENSMUSG00000025035	MGI:1929699	Arl3	372	505	390	1112	1229	966	989	6.902	8.225	5.752	19.211	22.673	21.856	19.699	P	P	2.78712	3.04003	2.524	2.78371	4.26386	4.50289	4.44993	4.30006	4.37919	-0.606002	-0.473602	-0.743746	0.0826937	0.182324	0.160253	0.0977835	-9.55725	0.0386879	0.0834489	-0.54	0.13075	-0.67075
ENSOCUG00000000108	ENSMUSG00000047446	MGI:99437	Arl4a	1000	882	731	562	700	418	338	18.555	14.365	10.781	9.709	12.914	9.457	6.732	P	P	4.21374	3.84452	3.4304	3.82955	3.27935	3.69083	3.24141	2.75112	3.24068	0.140842	-0.0524454	-0.269243	-0.327673	-0.156159	-0.343484	-0.547851	3.09395	0.0692573	0.124799	0.0445	-0.34375	0.38825
ENSOCUG00000005758	ENSMUSG00000049866	MGI:2445172	Arl4c	1372	2597	1858	438	310	263	188	25.458	42.298	27.402	7.567	5.719	5.95	3.745	P	P	4.67002	5.40252	4.7762	4.94958	2.91971	2.51574	2.57297	1.90483	2.47831	0.379707	0.763171	0.435292	-0.477579	-0.64596	-0.622104	-0.900603	5.8522	0.056062	0.107557	0.5715	-0.66175	1.23325
ENSOCUG00000024510	ENSMUSG00000036093	MGI:1922673	Arl5a	2135	3099	2380	317	224	240	207	39.615	50.474	35.1	5.477	4.132	5.43	4.123	P	A	5.30798	5.65748	5.13341	5.36629	2.45326	2.04697	2.44095	2.04372	2.24622	0.713679	0.896642	0.622294	-0.672004	-0.841353	-0.677137	-0.842707	15.1092	0.0103404	0.0328373	0.8055	-0.75825	1.56375
ENSOCUG00000014876	ENSMUSG00000017418	MGI:1923119	Arl5b	1301	1783	1405	133	73	61	78	24.14	29.04	20.721	2.298	1.347	1.38	1.554	P	A	4.59336	4.85998	4.37302	4.60879	1.2002	0.429441	0.464792	0.635639	0.682519	0.339575	0.47915	0.224226	-1.1943	-1.51557	-1.50084	-1.42963	17.863	0.00025525	0.00371451	0.4095	-1.41025	1.81975
ENSOCUG00000029293	ENSMUSG00000022722	MGI:1927136	Arl6	216	336	242	305	282	300	345	4.008	5.473	3.569	5.269	5.202	6.787	6.872	A	P	2.00285	2.45221	1.83553	2.09686	2.39759	2.37917	2.76287	2.78069	2.58008	-1.01657	-0.781329	-1.10416	-0.69521	-0.702887	-0.54295	-0.535524	-2.20826	0.219795	0.28899	-0.899	-0.61925	-0.27975
ENSOCUG00000005740	ENSMUSG00000030654	MGI:1858943	Arl6ip1	2189	4856	2614	4290	2171	2408	3185	40.617	79.091	38.551	74.114	40.051	54.481	63.44	P	P	5.34401	6.30544	5.26871	5.63939	6.21168	5.32376	5.76767	5.98731	5.82261	0.732544	1.23585	0.693122	0.894587	0.524482	0.709515	0.801066	0.955831	0.4917	0.55082	0.9845	0.7325	0.252
ENSOCUG00000000490	ENSMUSG00000029404	MGI:1929500	Arl6ip4	466	556	536	44	23	25	12	8.647	9.056	7.905	0.76	0.424	0.566	0.239	P	A	3.11214	3.17883	2.98276	3.09124	-0.395648	-1.23682	-0.822089	-2.0648	-1.12984	-0.435849	-0.400939	-0.503584	-1.85949	-2.21011	-2.03724	-2.55523	11.6923	0.00118223	0.00804347	-0.4185	-2.16525	1.74675
ENSOCUG00000008184	ENSMUSG00000035199	MGI:1929501	Arl6ip5	2090	2881	2389	6964	5165	3843	4901	38.78	46.924	35.233	120.311	95.284	86.947	97.619	P	P	5.27724	5.55224	5.13886	5.32278	6.91062	6.57417	6.44207	6.6091	6.63399	0.69759	0.841552	0.625144	1.18592	1.04568	0.990619	1.06024	-3.62545	0.0865346	0.146259	0.77	1.07075	-0.30075
ENSOCUG00000013257	ENSMUSG00000026960	MGI:1929507	Arl6ip6	257	360	295	1016	731	750	804	4.769	5.863	4.351	17.553	13.486	16.969	16.014	P	P	2.25358	2.55174	2.12124	2.30885	4.1336	3.75334	4.0848	4.00129	3.99326	-0.885309	-0.729222	-0.954592	0.0284	-0.130101	0.00805793	-0.0267523	-9.07953	0.0310412	0.0713969	-0.807	-0.03025	-0.77675
ENSOCUG00000014090	ENSMUSG00000030105	MGI:1914416	Arl8b	2219	3674	2760	3280	1924	1894	2818	41.174	59.839	40.705	56.666	35.494	42.852	56.13	P	P	5.36365	5.90302	5.34712	5.53793	5.8244	5.14951	5.42128	5.81069	5.55147	0.742824	1.02519	0.73417	0.73316	0.451851	0.565129	0.727446	1.69132	0.273001	0.342555	0.884	0.61925	0.26475
ENSOCUG00000000392	ENSMUSG00000027599	MGI:1921502	Armc1	942	1399	1120	1345	878	781	856	17.479	22.786	16.518	23.236	16.197	17.67	17.05	P	P	4.12754	4.51007	4.04595	4.22785	4.53831	4.01769	4.14323	4.0917	4.19774	0.0957154	0.29597	0.0530025	0.19709	-0.0199143	0.0324136	0.0109347	1.26855	0.366628	0.43416	0.196	0.055	0.141
ENSOCUG00000007315	ENSMUSG00000038525	MGI:1914461	Armc10	515	672	579	241	150	166	224	9.556	10.945	8.539	4.164	2.767	3.756	4.462	P	A	3.25639	3.45221	3.09409	3.26756	2.05781	1.46844	1.90909	2.15759	1.89823	-0.360337	-0.257825	-0.445302	-0.836836	-1.0825	-0.898823	-0.795245	7.31062	0.0027647	0.0133064	-0.309	-0.90325	0.59425
ENSOCUG00000011789	ENSMUSG00000071324	MGI:1916449	Armc2	123	129	131	364	210	220	317	2.282	2.101	1.932	6.288	3.874	4.977	6.314	A	P	1.19047	1.07112	0.95009	1.07056	2.65271	1.95386	2.31541	2.65858	2.39514	-1.44185	-1.50434	-1.56769	-0.588867	-0.880163	-0.72946	-0.586424	-10.1714	0.000637181	0.00590272	-1.473	-0.696	-0.777
ENSOCUG00000010896	ENSMUSG00000042178	MGI:2384586	Armc5	406	575	514	973	1232	749	688	7.533	9.365	7.58	16.81	22.728	16.946	13.704	P	P	2.91329	3.22731	2.92229	3.02096	4.07122	4.5064	4.08288	3.7765	4.10925	-0.539948	-0.375561	-0.535237	0.00239507	0.18379	0.0072556	-0.120448	-4.61732	0.0349077	0.0777023	-0.458	0.01825	-0.47625
ENSOCUG00000023141	ENSMUSG00000002343	MGI:1924063	Armc6	179	436	242	353	279	227	181	3.321	7.101	3.569	6.098	5.147	5.136	3.605	A	P	1.73177	2.82807	1.83553	2.13179	2.60844	2.36374	2.3606	1.85008	2.29572	-1.15848	-0.584561	-1.10416	-0.607319	-0.709318	-0.710625	-0.923421	-0.455626	0.721749	0.761437	-0.8715	-0.7375	-0.134
ENSOCUG00000015134	ENSMUSG00000032468	MGI:1921375	Armc8	1173	1623	1200	1754	1440	1297	1786	21.765	26.434	17.698	30.302	26.565	29.344	35.574	P	P	4.44395	4.72434	4.14549	4.43792	4.92135	4.73147	4.87502	5.15275	4.92015	0.261354	0.40814	0.10511	0.35675	0.277603	0.337437	0.453203	-0.265254	0.822332	0.851482	0.3345	0.35625	-0.02175
ENSOCUG00000014772	ENSMUSG00000062590	MGI:1926045	Armc9	406	530	417	1088	1244	975	1174	7.533	8.632	6.15	18.796	22.949	22.059	23.384	P	P	2.91329	3.10974	2.62057	2.8812	4.23238	4.52039	4.46331	4.54745	4.44088	-0.539948	-0.437109	-0.693189	0.0695729	0.189619	0.16583	0.200901	-10.8421	0.0138962	0.0407379	-0.4885	0.15675	-0.64525
ENSOCUG00000028120	ENSMUSG00000033460	MGI:1925498	Armcx1	446	1147	485	255	392	411	437	8.276	18.681	7.153	4.405	7.232	9.299	8.704	P	P	3.04886	4.22354	2.83851	3.3703	2.13927	2.85433	3.21705	3.12173	2.83309	-0.46898	0.14597	-0.579098	-0.80288	-0.504831	-0.35364	-0.393373	1.08771	0.445725	0.507381	-0.1615	-0.51375	0.35225
ENSOCUG00000000416	ENSMUSG00000033436	MGI:1914666	Armcx2	949	1592	1065	1387	2196	1542	1685	17.609	25.929	15.707	23.962	40.512	34.888	33.562	P	P	4.13822	4.69651	3.97331	4.26935	4.58267	5.34028	5.12464	5.06877	5.02909	0.101307	0.393575	0.0149724	0.215581	0.531368	0.441486	0.418197	-0.957279	0.471597	0.531054	0.2475	0.4015	-0.154
ENSOCUG00000004865	ENSMUSG00000049047	MGI:1918953	Armcx3	806	1151	893	1198	1165	1108	1001	14.955	18.747	13.17	20.697	21.492	25.068	19.938	P	P	3.90259	4.22856	3.71918	3.95011	4.37133	4.42573	4.6478	4.31746	4.44058	-0.0220453	0.1486	-0.118061	0.12749	0.150164	0.242726	0.105036	-1.02233	0.463257	0.523765	0.0635	0.15625	-0.09275
ENSOCUG00000010948	ENSMUSG00000072969	MGI:2148026	Armcx5	249	465	237	106	99	86	175	4.62	7.574	3.495	1.831	1.826	1.946	3.486	P	A	2.20796	2.92098	1.80541	2.31145	0.87284	0.868973	0.96032	1.80145	1.1259	-0.909193	-0.535926	-1.11993	-1.33076	-1.33237	-1.29429	-0.943693	2.40637	0.174092	0.242327	-0.7225	-1.22525	0.50275
ENSOCUG00000002776	ENSMUSG00000039901	MGI:1918867	Armh3	364	577	489	813	534	441	789	6.754	9.398	7.212	14.045	9.851	9.978	15.716	P	P	2.75575	3.23232	2.85036	2.94614	3.81203	3.30031	3.31869	3.97412	3.60129	-0.622421	-0.372938	-0.572895	-0.105639	-0.318934	-0.311274	-0.0380774	-2.11723	0.189866	0.259088	-0.4975	-0.1935	-0.304
ENSOCUG00000012279	ENSMUSG00000036242	MGI:1914669	Armh4	602	800	590	32	61	12	35	11.17	13.03	8.701	0.553	1.125	0.271	0.697	P	A	3.48158	3.70374	3.12124	3.43552	-0.85508	0.170354	-1.88098	-0.52048	-0.771547	-0.242449	-0.126144	-0.431088	-2.05099	-1.62357	-2.47861	-1.91152	9.78999	0.0010776	0.00761911	-0.184	-2.0165	1.8325
ENSOCUG00000002519	ENSMUSG00000061759	MGI:1920669	Armt1	365	463	408	2788	1367	1828	1765	6.773	7.541	6.017	48.166	25.219	41.358	35.156	P	P	2.75971	2.91476	2.58909	2.75452	5.58993	4.65641	5.37011	5.13569	5.18804	-0.620349	-0.539182	-0.709668	0.63543	0.246318	0.5438	0.44609	-11.2974	0.000386859	0.00454466	-0.5795	0.46775	-1.04725
ENSOCUG00000013582	ENSMUSG00000015522	MGI:88071	Arnt	1778	2188	2307	1926	1361	952	1548	32.991	35.637	34.024	33.274	25.108	21.539	30.833	P	P	5.044	5.15529	5.08847	5.09592	5.05631	4.65007	4.42887	4.94643	4.77042	0.575484	0.633744	0.598765	0.413004	0.243673	0.151474	0.367201	4.68111	0.00977841	0.0316368	0.6045	0.29375	0.31075
ENSOCUG00000017566	ENSMUSG00000015709	MGI:107188	Arnt2	228	432	260	68	46	38	58	4.231	7.036	3.834	1.175	0.849	0.86	1.155	P	A	2.08085	2.81478	1.93904	2.27822	0.232383	-0.236822	-0.218018	0.208217	-0.00355974	-0.975737	-0.591522	-1.04998	-1.59771	-1.79329	-1.78545	-1.60779	4.5741	0.110993	0.173938	-0.784	-1.696	0.912
ENSOCUG00000005940	ENSMUSG00000055116	MGI:1096381	Arntl	754	377	411	240	127	167	148	13.991	6.14	6.061	4.146	2.343	3.778	2.948	P	A	3.80638	2.61831	2.59966	3.00812	2.05181	1.2283	1.91776	1.55969	1.68939	-0.0724144	-0.694373	-0.704135	-0.839336	-1.18259	-0.895212	-1.04446	1.8947	0.287035	0.356096	-0.383	-0.99025	0.60725
ENSOCUG00000007097	ENSMUSG00000040187	MGI:2684845	Arntl2	277	369	440	1090	729	875	1157	5.14	6.01	6.489	18.831	13.449	19.797	23.045	P	P	2.3617	2.58737	2.69803	2.54903	4.23503	3.74939	4.30719	4.52641	4.20451	-0.828709	-0.710573	-0.652641	0.0706773	-0.131748	0.100756	0.19213	-9.16958	0.00157436	0.00937771	-0.77	0.058	-0.828
ENSOCUG00000003944	ENSMUSG00000029621	MGI:1928896	Arpc1a	944	2146	1278	6900	6123	5384	6701	17.516	34.952	18.848	119.205	112.958	121.812	133.472	P	P	4.1306	5.12732	4.23634	4.49809	6.8973	6.81964	6.92852	7.0604	6.92646	0.0973173	0.619105	0.152672	1.18037	1.148	1.19338	1.24835	-3.18621	0.191076	0.260064	0.358	1.19225	-0.83425
ENSOCUG00000025962	ENSMUSG00000029622	MGI:1343142	Arpc1b	6567	8497	8890	33514	26166	22796	16964	121.851	138.393	131.11	578.991	482.713	515.757	337.894	P	P	6.92898	7.11263	7.03464	7.02541	9.1774	8.91502	9.01055	8.40043	8.87585	1.56228	1.65842	1.61759	2.13076	2.0214	2.06121	1.8069	-4.66268	0.0101995	0.03256	1.61	2.005	-0.395
ENSOCUG00000005516	ENSMUSG00000006304	MGI:1923959	Arpc2	4595	6106	5420	25003	14358	14112	18713	85.261	99.45	79.934	431.954	264.878	319.283	372.731	P	P	6.41381	6.6359	6.32074	6.45682	8.75473	8.04918	8.31869	8.54199	8.41615	1.29258	1.40885	1.24387	1.95459	1.6605	1.77283	1.86591	-5.39016	0.010096	0.0323253	1.351	1.8135	-0.4625
ENSOCUG00000011908	ENSMUSG00000029465	MGI:1928375	Arpc3	2324	3017	2523	13741	8277	7393	10741	43.122	49.139	37.209	237.391	152.695	167.266	213.942	P	P	5.43035	5.61879	5.21759	5.42224	7.89112	7.25451	7.386	7.74108	7.56818	0.777742	0.876389	0.666361	1.59461	1.32926	1.38407	1.53207	-7.99847	0.00192174	0.0105015	0.827	1.46	-0.633
ENSOCUG00000026353	ENSMUSG00000079426	MGI:1915339	Arpc4	2085	2500	2192	7585	5340	4504	4837	38.687	40.718	32.328	131.039	98.513	101.903	96.345	P	P	5.27379	5.3476	5.0147	5.21203	7.03385	6.62224	6.67105	6.59013	6.72932	0.695781	0.734422	0.560146	1.23729	1.06572	1.08606	1.05233	-8.43687	0.00127655	0.00835771	0.715	1.11025	-0.39525
ENSOCUG00000002997	ENSMUSG00000026755	MGI:1921442	Arpc5l	816	1237	1034	740	483	464	630	15.141	20.147	15.249	12.784	8.91	10.498	12.549	P	P	3.92038	4.33252	3.93069	4.0612	3.6763	3.1555	3.39204	3.64944	3.46832	-0.0127326	0.203022	-0.00733794	-0.162214	-0.379297	-0.280702	-0.173408	2.87763	0.144067	0.210254	0.095	-0.24875	0.34375
ENSOCUG00000027243	ENSMUSG00000039043	MGI:1917670	Arpin	727	805	674	942	770	686	524	13.49	13.111	9.94	16.274	14.205	15.521	10.437	P	P	3.75377	3.71273	3.31327	3.59326	4.0245	3.82833	3.95612	3.38366	3.79815	-0.0999555	-0.121438	-0.330558	-0.0170758	-0.0988446	-0.0455795	-0.284193	0.0164295	0.987869	0.989568	-0.1105	-0.1115	0.001
ENSOCUG00000015489	ENSMUSG00000007656	MGI:1891691	Arpp19	1462	1962	1465	3682	2713	2623	3579	27.128	31.956	21.606	63.611	50.05	59.345	71.288	P	P	4.76169	4.998	4.43335	4.73101	5.99119	5.64529	5.89106	6.15558	5.92078	0.427693	0.551403	0.255809	0.802683	0.658503	0.760944	0.871202	-3.74447	0.0588392	0.111383	0.4895	0.7735	-0.284
ENSOCUG00000026291	ENSMUSG00000018909	MGI:99473	Arrb1	4339	5255	5573	1272	837	696	750	80.51	85.59	82.191	21.975	15.441	15.747	14.939	P	P	6.3311	6.41936	6.36091	6.37046	4.4578	3.9487	3.977	3.90098	4.07112	1.24929	1.29549	1.26489	0.163533	-0.0486721	-0.0368768	-0.0685616	21.5256	4.07361e-05	0.00172278	1.272	0.00225	1.26975
ENSOCUG00000025370	ENSMUSG00000060216	MGI:99474	Arrb2	1215	2059	1834	3038	1972	1794	1905	22.544	33.535	27.048	52.485	36.38	40.589	37.944	P	P	4.4947	5.06762	4.75745	4.77325	5.71383	5.18506	5.34302	5.24581	5.37193	0.287924	0.587849	0.425473	0.68707	0.466669	0.53251	0.491992	-0.676047	0.603978	0.655614	0.438	0.54475	-0.10675
ENSOCUG00000017576	ENSMUSG00000026972	MGI:2446136	Arrdc1	342	577	473	2516	2318	1748	1556	6.346	9.398	6.976	43.467	42.763	39.548	30.993	P	P	2.66581	3.23232	2.80236	2.90016	5.44184	5.41828	5.30554	4.95386	5.27988	-0.669506	-0.372938	-0.59802	0.573699	0.563881	0.51689	0.370301	-6.59719	0.0681009	0.123378	-0.5215	0.50625	-1.02775
ENSOCUG00000004378	ENSMUSG00000074794	MGI:2145242	Arrdc3	3640	3402	3124	6841	5219	6748	7725	67.54	55.409	46.073	118.186	96.281	152.673	153.869	P	P	6.07768	5.79206	5.52585	5.79853	6.88491	6.58917	7.2543	7.26556	6.99849	1.11662	0.967096	0.827734	1.1752	1.05193	1.32917	1.33386	-1.78575	0.182253	0.250817	1.042	1.2225	-0.1805
ENSOCUG00000009737	ENSMUSG00000042659	MGI:1913662	Arrdc4	523	784	621	1619	1222	1220	1639	9.704	12.769	9.159	27.97	22.544	27.602	32.646	P	P	3.27862	3.6746	3.19512	3.38278	4.80581	4.49464	4.78672	5.02884	4.779	-0.348696	-0.141402	-0.392412	0.308588	0.178889	0.300633	0.401552	-4.77712	0.0778238	0.135686	-0.245	0.29775	-0.54275
ENSOCUG00000008355	ENSMUSG00000022620	MGI:88077	Arsa	1018	1172	1137	5157	3851	3891	3065	18.889	19.089	16.769	89.093	71.044	88.033	61.05	P	P	4.23948	4.25465	4.06768	4.18727	6.47724	6.15063	6.45998	5.93191	6.25494	0.154316	0.162255	0.0643801	1.00528	0.869141	0.998083	0.777971	-13.7674	0.000784887	0.00641651	0.158	0.9125	-0.7545
ENSOCUG00000017402	ENSMUSG00000020604	MGI:1921258	Arsg	233	355	335	92	209	141	322	4.323	5.782	4.941	1.589	3.856	3.19	6.414	P	A	2.11214	2.53156	2.30468	2.31613	0.668482	1.94698	1.67361	2.68115	1.74255	-0.959353	-0.739785	-0.858557	-1.41594	-0.883034	-0.99698	-0.577013	0.578561	0.594086	0.646746	-0.8495	-0.96825	0.11875
ENSOCUG00000025005	ENSMUSG00000036412	MGI:2670959	Arsi	192	112	125	472	774	722	558	3.563	1.824	1.844	8.154	14.279	16.335	11.114	A	P	1.83292	0.867243	0.882452	1.19421	3.02756	3.83581	4.02991	3.47436	3.59191	-1.10553	-1.61106	-1.6031	-0.432622	-0.0957288	-0.0148221	-0.246388	-4.32056	0.103267	0.165621	-1.3585	-0.1975	-1.161
ENSOCUG00000010869	ENSMUSG00000046561	MGI:2443513	Arsj	329	228	250	298	355	216	361	6.105	3.713	3.687	5.148	6.549	4.887	7.19	A	P	2.6099	1.89278	1.88245	2.12838	2.36409	2.71129	2.28894	2.84609	2.5526	-0.698775	-1.07419	-1.0796	-0.709172	-0.564451	-0.740495	-0.508263	-1.30958	0.389022	0.454701	-0.8865	-0.63025	-0.25625
ENSOCUG00000010880	ENSMUSG00000021592	MGI:1924291	Arsk	623	625	637	1081	594	571	649	11.56	10.18	9.395	18.675	10.958	12.919	12.927	P	P	3.53105	3.3476	3.23182	3.37015	4.22307	3.45394	3.6914	3.69231	3.76518	-0.216552	-0.312586	-0.3732	0.0656914	-0.254901	-0.15592	-0.155541	-1.68086	0.170722	0.2388	-0.265	-0.12525	-0.13975
ENSOCUG00000003372	ENSMUSG00000034842	MGI:1202729	Art3	503	938	394	24	41	43	25	9.333	15.277	5.811	0.415	0.756	0.973	0.498	P	A	3.22237	3.93333	2.53872	3.23147	-1.27012	-0.402832	-0.0396803	-1.00591	-0.679634	-0.378144	-0.00595342	-0.736039	-2.22399	-1.86248	-1.71111	-2.11386	8.13029	0.0185374	0.0500038	-0.192	-1.97775	1.78575
ENSOCUG00000017191	ENSMUSG00000030217	MGI:1202710	Art4	603	412	696	147	4	20	84	11.189	6.71	10.265	2.54	0.074	0.452	1.673	P	A	3.48397	2.74639	3.35961	3.19666	1.34459	-3.76038	-1.14402	0.742554	-0.704314	-0.241196	-0.627323	-0.306299	-1.13412	-3.26198	-2.17143	-1.38506	3.01097	0.0428295	0.0894957	-0.434	-1.988	1.554
ENSOCUG00000000494	ENSMUSG00000031982	MGI:1916115	Arv1	94	105	114	808	836	810	974	1.744	1.71	1.681	13.959	15.423	18.326	19.4	A	P	0.802547	0.774134	0.749557	0.775413	3.80313	3.94698	4.19583	4.27801	4.05599	-1.64493	-1.65981	-1.67267	-0.109348	-0.049391	0.0543382	0.0885931	-35.6008	3.21599e-05	0.00153343	-1.6525	-0.00375	-1.64875
ENSOCUG00000004169	ENSMUSG00000031591	MGI:1277124	Asah1	4489	5697	4961	22367	11590	15048	17725	83.294	92.789	73.165	386.414	213.814	340.459	353.051	P	P	6.38014	6.53588	6.19308	6.3697	8.594	7.74021	8.41134	8.46373	8.30232	1.27496	1.35649	1.17703	1.88759	1.53171	1.81145	1.83329	-5.04102	0.00748237	0.0260864	1.3155	1.766	-0.4505
ENSOCUG00000017169	ENSMUSG00000024887	MGI:1859310	Asah2	930	1229	1047	4	0	2	4	17.256	20.017	15.441	0.069	0	0.045	0.08	P	A	4.10904	4.32316	3.94871	4.12697	-3.85508	-5.76038	-4.46595	-3.64976	-4.43279	0.0860325	0.198122	0.00209835	-3.30145	-4.09563	-3.55608	-3.21587	17.887	0.000164586	0.0029757	0.142	-3.54225	3.68425
ENSOCUG00000002414	ENSMUSG00000022377	MGI:1342335	Asap1	2621	4415	3636	2563	1323	1136	1881	48.633	71.908	53.624	44.279	24.407	25.702	37.466	P	P	5.60386	6.16809	5.7448	5.83892	5.46854	4.60921	4.6838	5.22752	4.99727	0.868574	1.16395	0.942359	0.584829	0.226644	0.257734	0.484368	3.66715	0.081854	0.140368	1.0165	0.3885	0.628
ENSOCUG00000003719	ENSMUSG00000052632	MGI:2685438	Asap2	2426	1973	2392	1276	1229	717	898	45.015	32.135	35.277	22.044	22.673	16.222	17.887	P	P	5.49232	5.00606	5.14067	5.21302	4.46233	4.50289	4.01988	4.16081	4.28648	0.810184	0.555626	0.626092	0.165421	0.182324	-0.0190011	0.039739	4.3451	0.0989546	0.160609	0.683	0.092	0.591
ENSOCUG00000000227	ENSMUSG00000036995	MGI:2684986	Asap3	728	919	798	317	602	370	246	13.508	14.968	11.769	5.477	11.106	8.371	4.9	P	P	3.75575	3.90381	3.55691	3.73882	2.45326	3.47324	3.06544	2.29275	2.82117	-0.0989174	-0.0214089	-0.203011	-0.672004	-0.246856	-0.416835	-0.738907	3.80481	0.0231157	0.058175	-0.06	-0.51875	0.45875
ENSOCUG00000007372	ENSMUSG00000026311	MGI:1929735	Asb1	844	2367	913	926	824	853	446	15.66	38.552	13.465	15.998	15.201	19.299	8.884	P	P	3.96906	5.26873	3.75114	4.32964	3.99979	3.92612	4.27046	3.15114	3.83687	0.0127484	0.693134	-0.101333	-0.0273775	-0.0580853	0.085443	-0.381114	1.26473	0.400981	0.466324	0.353	-0.09525	0.44825
ENSOCUG00000015921	ENSMUSG00000033781	MGI:2145525	Asb13	363	534	437	731	374	371	544	6.735	8.697	6.445	12.629	6.9	8.394	10.836	P	P	2.75178	3.12058	2.68816	2.85351	3.65865	2.78651	3.06933	3.4377	3.23805	-0.624499	-0.43143	-0.657808	-0.169572	-0.533098	-0.415212	-0.261668	-1.45226	0.260333	0.33028	-0.5275	-0.345	-0.1825
ENSOCUG00000025995	ENSMUSG00000021200	MGI:1929743	Asb2	884	636	692	1633	2982	1242	1820	16.403	10.359	10.206	28.212	55.012	28.1	36.251	P	P	4.03586	3.37277	3.3513	3.58664	4.81823	5.78168	4.8125	5.17996	5.14809	0.0477202	-0.299409	-0.310652	0.313766	0.715353	0.31138	0.464543	-2.91586	0.125712	0.190142	-0.1255	0.45125	-0.57675
ENSOCUG00000013610	ENSMUSG00000020305	MGI:1929749	Asb3	562	694	558	636	374	382	557	10.428	11.303	8.229	10.988	6.9	8.643	11.094	P	P	3.38238	3.49868	3.04079	3.30728	3.4578	2.78651	3.11148	3.47177	3.20689	-0.294377	-0.233496	-0.473204	-0.253289	-0.533098	-0.397642	-0.247467	1.26386	0.27723	0.346877	-0.2635	-0.35775	0.09425
ENSOCUG00000014169	ENSMUSG00000030509	MGI:2152835	Asb7	584	752	540	105	68	46	76	10.836	12.248	7.964	1.814	1.254	1.041	1.514	P	A	3.43778	3.61448	2.99348	3.34858	0.859165	0.327079	0.0576169	0.598164	0.460506	-0.265376	-0.172875	-0.497968	-1.33646	-1.55824	-1.67056	-1.44525	14.9972	0.000121391	0.00261113	-0.219	-1.5025	1.2835
ENSOCUG00000017455	ENSMUSG00000048175	MGI:1925791	Asb8	486	667	506	910	873	541	602	9.018	10.864	7.463	15.721	16.105	12.24	11.991	P	P	3.17277	3.44143	2.89966	3.17129	3.97464	4.00945	3.61354	3.58386	3.79537	-0.404111	-0.263466	-0.547085	-0.0378587	-0.0233486	-0.188374	-0.200747	-2.59946	0.122896	0.187046	-0.3335	-0.1125	-0.221
ENSOCUG00000016753	ENSMUSG00000044475	MGI:1916340	Ascc1	250	327	309	454	241	162	504	4.639	5.326	4.557	7.843	4.446	3.665	10.039	A	P	2.21374	2.41304	2.18813	2.27164	2.97147	2.15251	1.8739	3.32752	2.58135	-0.906166	-0.801835	-0.919574	-0.456003	-0.797364	-0.913491	-0.307595	-1.5589	0.20047	0.269743	-0.854	-0.6185	-0.2355
ENSOCUG00000005290	ENSMUSG00000020412	MGI:1922702	Ascc2	988	1212	1314	2117	2162	1621	1405	18.332	19.74	19.379	36.573	39.885	36.675	27.985	P	P	4.19632	4.30306	4.27642	4.2586	5.19273	5.31777	5.19672	4.80659	5.12845	0.131724	0.187602	0.173653	0.469864	0.521984	0.471531	0.308915	-5.23173	0.00640479	0.0235492	0.16	0.44325	-0.28325
ENSOCUG00000002766	ENSMUSG00000038774	MGI:1925237	Ascc3	3186	4207	3599	1477	1062	1085	1573	59.116	68.521	53.078	25.517	19.592	24.548	31.331	P	P	5.88549	6.09846	5.73005	5.90467	4.67337	4.29218	4.61753	4.96954	4.63816	1.01601	1.1275	0.934634	0.253387	0.0944994	0.230112	0.376836	10.3398	0.00166067	0.00966689	1.072	0.2385	0.8335
ENSOCUG00000015897	ENSMUSG00000019857	MGI:1913653	Asf1a	319	308	262	914	893	911	1191	5.919	5.016	3.864	15.79	16.474	20.611	23.723	A	P	2.56537	2.32668	1.95009	2.28071	3.98097	4.04213	4.36536	4.56819	4.23916	-0.722087	-0.847045	-1.04419	-0.0352212	-0.00972746	0.125002	0.209546	-10.0707	0.00293135	0.0138346	-0.7845	0.0725	-0.857
ENSOCUG00000014986	ENSMUSG00000028053	MGI:2183158	Ash1l	6107	7773	7069	2933	2489	1796	2905	113.316	126.601	104.254	50.671	45.917	40.634	57.863	P	P	6.82421	6.98414	6.70396	6.83744	5.66308	5.52097	5.34463	5.85456	5.59581	1.50743	1.59116	1.44448	0.665919	0.606682	0.53318	0.745731	14.778	0.00046005	0.00496747	1.549	0.638	0.911
ENSOCUG00000029521	ENSMUSG00000031575	MGI:1344416	Ash2l	992	1396	1104	861	546	437	531	18.407	22.737	16.282	14.875	10.073	9.887	10.577	P	P	4.20215	4.50697	4.02519	4.24477	3.89479	3.33237	3.30554	3.4028	3.48388	0.134776	0.294349	0.0421353	-0.0711433	-0.30557	-0.316753	-0.276213	4.64893	0.0380385	0.0825709	0.2145	-0.2425	0.457
ENSOCUG00000009253	ENSMUSG00000025533	MGI:88084	Asl	445	1858	637	1214	865	698	613	8.257	30.262	9.395	20.973	15.958	15.792	12.21	P	P	3.04562	4.91942	3.23182	3.73229	4.39047	3.99617	3.98114	3.60998	3.99444	-0.470675	0.510269	-0.3732	0.135468	-0.0288846	-0.0351513	-0.189858	0.0995011	0.936422	0.948218	0.0195	-0.02975	0.04925
ENSOCUG00000024962	ENSMUSG00000093806	MGI:96090	Asmt	4	1	0	426	608	431	158	0.074	0.016	0	7.36	11.216	9.751	3.147	A	P	-3.75204	-5.94011	-6.08333	-5.2585	2.87963	3.48754	3.2856	1.65402	2.8267	-4.02928	-5.17474	-5.24972	-0.494284	-0.240892	-0.325067	-1.00515	-6.83203	0.0679091	0.123191	-4.602	-0.51625	-4.08575
ENSOCUG00000008266	ENSMUSG00000052456	MGI:1928379	Asna1	614	775	707	3462	2811	2224	2724	11.393	12.623	10.427	59.81	51.858	50.318	54.257	P	P	3.51005	3.65794	3.38223	3.51674	5.90231	5.69648	5.653	5.76175	5.75338	-0.227542	-0.150122	-0.294456	0.765634	0.679842	0.661715	0.707045	-19.7801	0.004873	0.0195785	-0.189	0.70375	-0.89275
ENSOCUG00000022945	ENSMUSG00000029752	MGI:1350929	Asns	280	1275	265	356	245	302	491	5.195	20.766	3.908	6.15	4.52	6.833	9.78	P	P	2.37724	4.37617	1.96652	2.90664	2.62065	2.17625	2.77246	3.28982	2.7148	-0.820574	0.225874	-1.03559	-0.60223	-0.787466	-0.538954	-0.323309	0.498428	0.701373	0.743165	-0.2975	-0.56275	0.26525
ENSOCUG00000012468	ENSMUSG00000026095	MGI:1917646	Asnsd1	82	148	135	1516	1502	1350	1338	1.522	2.411	1.991	26.191	27.709	30.544	26.651	A	P	0.60551	1.26934	0.993483	0.956112	4.71097	4.79229	4.9328	4.7361	4.79304	-1.74808	-1.40056	-1.54498	0.26906	0.302952	0.361521	0.279533	-10.7476	0.0554803	0.10682	-1.5745	0.3035	-1.878
ENSOCUG00000005855	ENSMUSG00000020774	MGI:87914	Aspa	376	610	368	2110	2510	1393	3388	6.977	9.935	5.427	36.453	46.305	31.516	67.483	P	P	2.80255	3.31255	2.44023	2.85178	5.18795	5.53309	4.97803	6.07645	5.44388	-0.597924	-0.330934	-0.787599	0.467873	0.611735	0.380376	0.838221	-6.22891	0.0194438	0.0517313	-0.4645	0.5745	-1.039
ENSOCUG00000014733	ENSMUSG00000033952	MGI:1334448	Aspm	305	323	394	915	360	635	640	5.659	5.261	5.811	15.808	6.641	14.367	12.748	P	P	2.50062	2.39528	2.53872	2.47821	3.98255	2.73147	3.84467	3.67216	3.55771	-0.755983	-0.811131	-0.736039	-0.0345637	-0.55604	-0.0920351	-0.163938	-4.72855	0.0143491	0.0415656	-0.7835	-0.21175	-0.57175
ENSOCUG00000028053	ENSMUSG00000021388	MGI:1913945	Aspn	1819	1361	1372	2732	2987	5238	4565	33.752	22.167	20.234	47.198	55.104	118.509	90.927	P	P	5.07689	4.47034	4.33873	4.62865	5.56066	5.7841	6.88886	6.50664	6.18506	0.592702	0.275172	0.206275	0.623228	0.716361	1.17685	1.01753	-2.19438	0.137657	0.203494	0.434	0.8835	-0.4495
ENSOCUG00000027059	ENSMUSG00000025142	MGI:1916188	Aspscr1	465	747	600	263	202	150	112	8.628	12.167	8.849	4.544	3.727	3.394	2.231	P	A	3.10904	3.60485	3.14549	3.28646	2.18384	1.89783	1.76287	1.15759	1.75053	-0.437471	-0.177914	-0.418394	-0.784304	-0.90352	-0.959771	-1.21207	4.16702	0.0510929	0.100461	-0.3075	-0.965	0.6575
ENSOCUG00000005922	ENSMUSG00000024654	MGI:1913764	Asrgl1	424	841	385	967	1060	624	732	7.867	13.698	5.678	16.706	19.555	14.118	14.58	P	P	2.97588	3.77585	2.50538	3.0857	4.06229	4.28946	3.81946	3.86594	4.00929	-0.507185	-0.0883959	-0.753491	-0.00132461	0.0933659	-0.102543	-0.0831699	-1.27913	0.408657	0.47344	-0.2975	-0.0235	-0.274
ENSOCUG00000009045	ENSMUSG00000076441	MGI:88090	Ass1	534	1959	637	243	280	214	214	9.908	31.907	9.395	4.198	5.165	4.842	4.263	P	A	3.30865	4.99579	3.23182	3.84542	2.06973	2.3689	2.27552	2.0917	2.20146	-0.332975	0.550247	-0.3732	-0.831866	-0.707167	-0.746089	-0.822708	2.00096	0.293232	0.362377	0.1085	-0.777	0.8855
ENSOCUG00000015550	ENSMUSG00000026587	MGI:1098567	Astn1	90	1610	180	25	0	0	32	1.67	26.223	2.655	0.432	0	0	0.637	P	A	0.739811	4.71273	1.40852	2.28702	-1.21122	-5.76038	-5.46595	-0.649764	-3.27183	-1.67777	0.402066	-1.3277	-2.19944	-4.09563	-3.9729	-1.96541	2.04388	0.205533	0.274693	-0.638	-3.05825	2.42025
ENSOCUG00000000863	ENSMUSG00000028373	MGI:1889277	Astn2	364	1068	296	26	22	32	60	6.754	17.395	4.365	0.449	0.406	0.724	1.195	P	A	2.75575	4.12058	2.12612	3.00082	-1.15464	-1.30095	-0.465945	0.257127	-0.666103	-0.622421	0.0920737	-0.952036	-2.17585	-2.23684	-1.88879	-1.5874	4.41259	0.0906735	0.151741	-0.265	-1.97225	1.70725
ENSOCUG00000017108	ENSMUSG00000037486	MGI:1922552	Asxl2	1928	2812	2706	1882	886	630	813	35.774	45.8	39.908	32.514	16.345	14.254	16.194	P	P	5.16085	5.51727	5.31861	5.33224	5.02297	4.03078	3.83326	4.01735	4.22609	0.636655	0.823244	0.719247	0.399107	-0.0144598	-0.0967888	-0.0200582	4.5478	0.0138549	0.0406535	0.73	0.067	0.663
ENSOCUG00000012082	ENSMUSG00000013662	MGI:1915229	Atad1	1601	2631	1625	1474	975	995	1297	29.707	42.852	23.966	25.465	17.987	22.512	25.834	P	P	4.89272	5.42128	4.58289	4.96563	4.67044	4.16887	4.49261	4.6912	4.50578	0.496287	0.772995	0.334093	0.252165	0.0431013	0.17804	0.260817	3.06008	0.156017	0.222751	0.6345	0.1835	0.451
ENSOCUG00000005723	ENSMUSG00000052812	MGI:2444798	Atad2b	1888	2265	2300	440	286	216	329	35.032	36.891	33.921	7.601	5.276	4.887	6.553	P	P	5.1306	5.20518	5.08409	5.13996	2.92628	2.39949	2.28894	2.71218	2.58172	0.620821	0.659866	0.59647	-0.474839	-0.694417	-0.740495	-0.56408	19.7818	9.42768e-05	0.00236919	0.6405	-0.61825	1.25875
ENSOCUG00000026839	ENSMUSG00000029036	MGI:1919214	Atad3a	651	836	845	23	22	10	4	12.079	13.616	12.462	0.397	0.406	0.226	0.08	P	A	3.59447	3.76725	3.63947	3.66706	-1.33152	-1.30095	-2.14402	-3.64976	-2.10656	-0.183349	-0.0928996	-0.159789	-2.24958	-2.23684	-2.58825	-3.21587	10.4198	0.00137293	0.00863253	-0.138	-2.57275	2.43475
ENSOCUG00000015229	ENSMUSG00000017550	MGI:2442925	Atad5	255	389	340	1074	507	486	934	4.732	6.336	5.014	18.555	9.353	10.996	18.604	P	P	2.24231	2.66351	2.32606	2.41063	4.2137	3.22546	3.45887	4.21752	3.77888	-0.89121	-0.670708	-0.847368	0.0617847	-0.350135	-0.252845	0.0633757	-4.31209	0.0243418	0.0602722	-0.781	-0.1195	-0.6615
ENSOCUG00000002153	ENSMUSG00000024426	MGI:1913869	Atat1	236	285	359	782	764	540	744	4.379	4.642	5.295	13.51	14.094	12.217	14.819	A	P	2.1306	2.21471	2.40451	2.24994	3.75594	3.81705	3.61087	3.8894	3.76831	-0.949691	-0.905661	-0.806299	-0.129017	-0.103549	-0.189487	-0.0733917	-24.3798	7.23229e-05	0.00213177	-0.928	-0.12375	-0.80425
ENSOCUG00000003373	ENSMUSG00000030850	MGI:1333870	Ate1	1683	2647	1992	3331	2902	2273	3142	31.228	43.112	29.378	57.547	53.536	51.426	62.583	P	P	4.96478	5.43003	4.87667	5.09049	5.84666	5.74245	5.68444	5.9677	5.81031	0.534012	0.777574	0.487887	0.742438	0.699	0.67482	0.792892	-0.571255	0.663	0.708797	0.656	0.72725	-0.07125
ENSOCUG00000017023	ENSMUSG00000023027	MGI:1298366	Atf1	650	860	766	1334	805	1168	1387	12.061	14.007	11.297	23.046	14.851	26.426	27.627	P	P	3.59225	3.80808	3.49787	3.63273	4.52646	3.89246	4.72388	4.78799	4.4827	-0.18451	-0.071523	-0.233921	0.192152	-0.0721137	0.274439	0.301161	-2.95817	0.0424936	0.0889851	-0.1285	0.17375	-0.30225
ENSOCUG00000012156	ENSMUSG00000027104	MGI:109349	Atf2	1504	2554	1698	2222	1338	1347	2181	27.907	41.598	25.042	38.387	24.684	30.476	43.442	P	P	4.80255	5.37843	4.64629	4.94242	5.26256	4.62548	4.92959	5.44101	5.06466	0.449084	0.750562	0.367282	0.498974	0.233424	0.360183	0.573355	1.0888	0.418379	0.481818	0.6	0.41625	0.18375
ENSOCUG00000017424	ENSMUSG00000026628	MGI:109384	Atf3	1207	2092	2587	28671	34869	16576	18878	22.396	34.073	38.153	495.323	643.267	375.03	376.017	P	P	4.48517	5.09056	5.25373	4.94315	8.95222	9.32927	8.55086	8.55465	8.84675	0.282934	0.599857	0.685281	2.0369	2.19407	1.86961	1.87119	-8.79049	0.0282182	0.0668156	0.4415	1.993	-1.5515
ENSOCUG00000007930	ENSMUSG00000026663	MGI:1926157	Atf6	2613	3665	3029	1859	1173	1026	2065	48.484	59.693	44.672	32.116	21.64	23.213	41.131	P	P	5.59945	5.89949	5.48129	5.66008	5.00523	4.4356	4.53687	5.36216	4.83497	0.866265	1.02334	0.80441	0.391713	0.15428	0.19649	0.540489	5.23554	0.0099257	0.0319481	0.9445	0.3205	0.624
ENSOCUG00000023089	ENSMUSG00000015461	MGI:105121	Atf6b	743	1106	935	2433	2854	1608	2028	13.786	18.014	13.789	42.033	52.651	36.381	40.394	P	P	3.78518	4.17102	3.78549	3.9139	5.39344	5.71839	5.18511	5.33608	5.40825	-0.0835139	0.118479	-0.0833496	0.553527	0.688971	0.466689	0.529617	-4.87894	0.07164	0.127908	0.017	0.56	-0.543
ENSOCUG00000005707	ENSMUSG00000099083	MGI:2443472	Atf7	1821	2058	2052	844	701	439	644	33.789	33.519	30.263	14.581	12.932	9.932	12.827	P	P	5.07847	5.06692	4.91948	5.02162	3.86602	3.69289	3.31213	3.68115	3.63805	0.593532	0.587482	0.5103	-0.0831354	-0.155301	-0.314007	-0.160191	15.7635	0.000524007	0.00534278	0.5905	-0.178	0.7685
ENSOCUG00000012361	ENSMUSG00000030213	MGI:1858965	Atf7ip	3671	4295	4299	1728	1020	832	1522	68.116	69.954	63.402	29.853	18.817	18.824	30.316	P	P	6.08992	6.12833	5.98645	6.06823	4.89981	4.23397	4.23449	4.92199	4.57257	1.12303	1.14314	1.06886	0.34777	0.0702343	0.0704531	0.357016	11.2159	0.00132768	0.00855336	1.133	0.21125	0.92175
ENSOCUG00000008736	ENSMUSG00000021619	MGI:1914045	Atg10	201	274	280	708	559	326	473	3.73	4.463	4.129	12.231	10.312	7.376	9.421	A	P	1.89901	2.15792	2.04595	2.03429	3.61253	3.36632	2.88278	3.23593	3.27439	-1.07093	-0.935389	-0.994006	-0.188797	-0.29142	-0.492969	-0.345769	-7.2418	0.00689054	0.0247414	-1.003	-0.32975	-0.67325
ENSOCUG00000024797	ENSMUSG00000037204	MGI:1915368	Atg101	362	522	353	451	455	285	146	6.717	8.502	5.206	7.792	8.394	6.448	2.908	P	P	2.7478	3.08779	2.38019	2.7386	2.9619	3.06934	2.68887	1.54006	2.56504	-0.626583	-0.448596	-0.819029	-0.45999	-0.415209	-0.573795	-1.05264	0.510773	0.636462	0.685665	-0.538	-0.6255	0.0875
ENSOCUG00000029145	ENSMUSG00000032905	MGI:1914776	Atg12	870	1496	1041	451	252	283	250	16.143	24.366	15.353	7.792	4.649	6.403	4.98	P	P	4.01283	4.60678	3.94042	4.18668	2.9619	2.2169	2.67871	2.31602	2.54338	0.0356634	0.346601	-0.00224221	-0.45999	-0.770525	-0.57803	-0.729208	4.82714	0.0733353	0.130091	0.1915	-0.6345	0.826
ENSOCUG00000016144	ENSMUSG00000027244	MGI:1196429	Atg13	744	1132	968	1165	956	620	1089	13.805	18.437	14.276	20.127	17.636	14.027	21.691	P	P	3.78712	4.20455	3.83553	3.9424	4.33103	4.14048	3.81018	4.43902	4.18018	-0.0824981	0.136028	-0.0571531	0.110693	0.0312671	-0.106411	0.155706	-0.170421	0.883796	0.903868	0.027	0.048	-0.021
ENSOCUG00000014723	ENSMUSG00000037526	MGI:1261775	Atg14	313	511	475	576	491	278	366	5.808	8.323	7.005	9.951	9.058	6.29	7.29	P	P	2.53798	3.05707	2.80845	2.80117	3.31484	3.1792	2.653	2.86594	3.00324	-0.736428	-0.464681	-0.594833	-0.312877	-0.369418	-0.588749	-0.499991	-1.05704	0.435099	0.497614	-0.6005	-0.44275	-0.15775
ENSOCUG00000015285	ENSMUSG00000026289	MGI:1924290	Atg16l1	1381	1937	1709	762	695	455	606	25.625	31.548	25.204	13.164	12.821	10.294	12.07	P	P	4.67946	4.9795	4.6556	4.77152	3.71857	3.68049	3.36378	3.59341	3.58906	0.384645	0.541718	0.372159	-0.144597	-0.16047	-0.29248	-0.196764	7.77319	0.0423954	0.0888942	0.4635	-0.1985	0.662
ENSOCUG00000010446	ENSMUSG00000047767	MGI:1920933	Atg16l2	1017	1084	1231	931	1064	386	429	18.871	17.655	18.155	16.084	19.629	8.733	8.545	P	P	4.23806	4.14204	4.18228	4.18746	4.00756	4.2949	3.12651	3.09507	3.63101	0.153573	0.103304	0.124373	-0.0241392	0.0956309	-0.391378	-0.404483	2.37762	0.0916772	0.152731	0.1285	-0.18075	0.30925
ENSOCUG00000014831	ENSMUSG00000041341	MGI:1923809	Atg2b	1763	2714	2126	2517	2101	1496	1876	32.713	44.204	31.354	43.484	38.759	33.847	37.367	P	P	5.03177	5.46609	4.97059	5.15615	5.44241	5.27648	5.08095	5.22368	5.25588	0.569085	0.796453	0.537057	0.573938	0.504774	0.423274	0.482767	1.58236	0.333942	0.401664	0.6825	0.49625	0.18625
ENSOCUG00000015651	ENSMUSG00000022663	MGI:1915091	Atg3	1038	1449	1304	2193	1627	1649	2658	19.26	23.6	19.231	37.886	30.015	37.308	52.943	P	P	4.26755	4.56073	4.2654	4.36456	5.24361	4.90761	5.22143	5.72636	5.27475	0.16901	0.322492	0.167883	0.491074	0.351024	0.481829	0.692295	-2.4871	0.096362	0.157823	0.2455	0.504	-0.2585
ENSOCUG00000021604	ENSMUSG00000026280	MGI:1913865	Atg4b	1066	1927	1377	1525	1755	1056	967	19.78	31.386	20.308	26.346	32.376	23.892	19.261	P	P	4.30595	4.97203	4.34398	4.54065	4.71951	5.01687	4.57845	4.26761	4.64561	0.189113	0.537808	0.209022	0.272619	0.396565	0.213821	0.0842557	0.652452	0.61094	0.662055	0.3635	0.242	0.1215
ENSOCUG00000007695	ENSMUSG00000028550	MGI:2651854	Atg4c	384	530	474	1054	844	1022	1064	7.125	8.632	6.991	18.209	15.57	23.123	21.193	P	P	2.83292	3.10974	2.80541	2.91602	4.18658	3.96072	4.53123	4.40552	4.27101	-0.582024	-0.437109	-0.596425	0.0504809	-0.0436639	0.194141	0.14174	-6.64988	0.0186689	0.0502469	-0.5095	0.0855	-0.595
ENSOCUG00000014176	ENSMUSG00000002820	MGI:2444308	Atg4d	459	561	583	0	4	2	0	8.517	9.137	8.598	0	0.074	0.045	0	P	A	3.09031	3.19175	3.10402	3.12869	-5.85508	-3.76038	-4.46595	-5.64976	-4.93279	-0.44728	-0.394177	-0.440102	-4.1351	-3.26198	-3.55608	-4.04952	15.9608	0.000446736	0.00492231	-0.4205	-3.75075	3.33025
ENSOCUG00000013358	ENSMUSG00000038160	MGI:1277186	Atg5	617	1091	811	1974	1421	1386	1592	11.448	17.769	11.961	34.103	26.215	31.358	31.71	P	P	3.51708	4.15132	3.58023	3.74954	5.09183	4.71231	4.97077	4.98686	4.94044	-0.223861	0.108166	-0.190806	0.427807	0.269616	0.377347	0.384056	-2.49625	0.226957	0.296562	-0.058	0.36475	-0.42275
ENSOCUG00000001908	ENSMUSG00000030314	MGI:1921494	Atg7	1196	1615	1613	1365	785	660	669	22.192	26.304	23.789	23.582	14.482	14.932	13.325	P	P	4.47196	4.71721	4.5722	4.58712	4.55961	3.85617	3.90038	3.7361	4.01306	0.27602	0.404408	0.328495	0.205966	-0.0872427	-0.0688142	-0.137289	3.60558	0.0278915	0.0662872	0.34	-0.02175	0.36175
ENSOCUG00000015120	ENSMUSG00000033124	MGI:2138446	Atg9a	486	806	682	1644	1690	1278	1324	9.018	13.128	10.058	28.402	31.177	28.915	26.372	P	P	3.17277	3.71452	3.3303	3.40586	4.82791	4.96242	4.85373	4.72092	4.84125	-0.404111	-0.1205	-0.321646	0.317803	0.37387	0.328562	0.273207	-4.09757	0.144394	0.21047	-0.2625	0.3235	-0.586
ENSOCUG00000001121	ENSMUSG00000026192	MGI:1351352	Atic	1178	1714	1311	3333	2296	2049	2703	21.858	27.916	19.335	57.581	42.357	46.358	53.839	P	P	4.45008	4.80304	4.27312	4.50875	5.84753	5.40452	5.53476	5.75058	5.63435	0.264567	0.449342	0.171926	0.742799	0.558146	0.612431	0.702391	-2.9338	0.143858	0.210043	0.357	0.65375	-0.29675
ENSOCUG00000017706	ENSMUSG00000021066	MGI:1921241	Atl1	289	1783	367	129	191	123	219	5.362	29.04	5.413	2.229	3.524	2.783	4.362	P	A	2.42288	4.85998	2.4363	3.23972	1.15615	1.81705	1.47657	2.12502	1.6437	-0.79668	0.47915	-0.789654	-1.21267	-0.937192	-1.07911	-0.80882	1.32073	0.406606	0.471457	-0.159	-1.0095	0.8505
ENSOCUG00000016184	ENSMUSG00000059811	MGI:1929492	Atl2	1187	1377	1403	2447	2942	2702	2783	22.025	22.428	20.692	42.275	54.274	61.132	55.433	P	P	4.46106	4.4872	4.37097	4.43974	5.40172	5.7622	5.93387	5.79266	5.72261	0.270315	0.283999	0.22315	0.556977	0.707233	0.778788	0.719931	-8.66112	0.00274988	0.0132679	0.277	0.69075	-0.41375
ENSOCUG00000001691	ENSMUSG00000024759	MGI:1924270	Atl3	6100	7953	6631	3354	2033	1601	1858	113.186	129.533	97.794	57.944	37.505	36.222	37.008	P	P	6.82255	7.01717	6.61168	6.81713	5.85659	5.22901	5.17881	5.20977	5.36855	1.50656	1.60845	1.39617	0.746576	0.484989	0.464065	0.476969	11.9683	0.000384775	0.00453857	1.5575	0.54325	1.01425
ENSOCUG00000014663	ENSMUSG00000034218	MGI:107202	Atm	1715	2389	1998	1424	793	811	1179	31.822	38.91	29.467	24.601	14.629	18.349	23.484	P	P	4.99195	5.28208	4.88101	5.05168	4.62065	3.87079	4.19761	4.55358	4.31066	0.548237	0.700121	0.490159	0.231412	-0.0811454	0.0550801	0.203457	4.97987	0.0176155	0.048158	0.624	0.102	0.522
ENSOCUG00000007807	ENSMUSG00000047388	MGI:2682328	Atmin	539	1249	645	1035	799	610	1008	10.001	20.343	9.512	17.881	14.74	13.801	20.078	P	P	3.3221	4.34645	3.24982	3.63946	4.16033	3.88167	3.78672	4.32752	4.03906	-0.325937	0.210313	-0.363774	0.0395418	-0.0766126	-0.116189	0.109227	-0.172169	0.889911	0.909548	-0.058	-0.011	-0.047
ENSOCUG00000003528	ENSMUSG00000037621	MGI:1918343	Atoh8	302	287	384	330	762	332	269	5.604	4.674	5.663	5.701	14.057	7.511	5.358	P	P	2.48636	2.2248	2.50163	2.40426	2.51124	3.81326	2.90909	2.4217	2.91382	-0.763448	-0.900379	-0.755455	-0.647835	-0.105125	-0.482002	-0.685159	-2.35565	0.0785677	0.136616	-0.8315	-0.48	-0.3515
ENSOCUG00000012123	ENSMUSG00000018585	MGI:1333855	Atox1	1102	1418	1199	1452	1207	838	1111	20.448	23.095	17.683	25.085	22.267	18.96	22.129	P	P	4.35387	4.52953	4.14428	4.34256	4.64875	4.47683	4.24486	4.46788	4.45958	0.214198	0.306158	0.10448	0.243122	0.171462	0.0747742	0.167733	1.6664	0.225958	0.295496	0.26	0.16425	0.09575
ENSOCUG00000006386	ENSMUSG00000025324	MGI:1330809	Atp10a	1637	1703	1866	2092	2416	1808	2434	30.375	27.737	27.52	36.142	44.571	40.906	48.481	P	P	4.9248	4.79375	4.7824	4.83365	5.17559	5.47802	5.35423	5.59935	5.4018	0.513082	0.444479	0.438537	0.462721	0.588782	0.537184	0.639354	-1.53786	0.214618	0.28364	0.4785	0.557	-0.0785
ENSOCUG00000025493	ENSMUSG00000031441	MGI:1354735	Atp11a	3217	4473	4287	754	450	356	573	59.692	72.853	63.225	13.026	8.302	8.054	11.413	P	P	5.89946	6.18692	5.98242	6.02293	3.70334	3.0534	3.00979	3.51263	3.31979	1.02332	1.17381	1.06675	-0.150943	-0.421853	-0.440031	-0.230436	13.5644	0.00115905	0.00794991	1.0985	-0.31075	1.40925
ENSOCUG00000012358	ENSMUSG00000037400	MGI:1923545	Atp11b	1771	2588	2120	3629	3444	2976	3893	32.861	42.151	31.266	62.695	63.535	67.332	77.542	P	P	5.03831	5.39751	4.96652	5.13411	5.97028	5.98949	6.07321	6.2769	6.07747	0.572505	0.76055	0.534922	0.793964	0.801971	0.836871	0.921773	-1.74447	0.298889	0.367501	0.667	0.83875	-0.17175
ENSOCUG00000009094	ENSMUSG00000031862	MGI:2180801	Atp13a1	1168	1534	1579	3301	2762	2004	2183	21.672	24.985	23.287	57.028	50.954	45.34	43.482	P	P	4.43778	4.64297	4.54146	4.54074	5.83361	5.67111	5.50272	5.44233	5.61244	0.258128	0.365545	0.312405	0.736998	0.669267	0.599077	0.573906	-5.09473	0.036534	0.0801096	0.312	0.64475	-0.33275
ENSOCUG00000016297	ENSMUSG00000036622	MGI:1922022	Atp13a2	1980	3742	3153	2418	2638	1876	1346	36.739	60.947	46.501	41.774	48.666	42.444	26.81	P	P	5.19924	5.92948	5.53918	5.55597	5.38452	5.60485	5.4075	4.7447	5.28539	0.656755	1.03904	0.834712	0.549808	0.641645	0.559386	0.283117	1.64566	0.29686	0.365606	0.848	0.5085	0.3395
ENSOCUG00000016532	ENSMUSG00000022533	MGI:2685387	Atp13a3	5097	6204	5713	3951	1827	2074	2432	94.575	101.046	84.256	68.258	33.705	46.924	48.441	P	P	6.56339	6.65887	6.3967	6.53965	6.09292	5.07488	5.55226	5.59816	5.57955	1.37089	1.42088	1.28363	0.845085	0.420743	0.619724	0.63886	8.48063	0.00198901	0.0107603	1.396	0.63125	0.76475
ENSOCUG00000001324	ENSMUSG00000033161	MGI:88105	Atp1a1	8964	28640	11441	31820	19024	15866	26034	166.328	466.467	168.732	549.725	350.957	358.967	518.552	P	P	7.37788	8.86563	7.39859	7.8807	9.10257	8.45515	8.48771	9.01835	8.76594	1.79728	2.57613	1.80812	2.09957	1.82971	1.84328	2.06446	0.573904	0.663342	0.709047	2.1865	1.95925	0.22725
ENSOCUG00000017667	ENSMUSG00000007097	MGI:88106	Atp1a2	5997	6294	6138	2145	4488	1700	1959	111.275	102.512	90.523	37.057	82.795	38.462	39.02	P	P	6.79798	6.67965	6.50022	6.65928	5.21168	6.37147	5.26537	5.28614	5.53367	1.4937	1.43175	1.33782	0.477766	0.961192	0.500146	0.508801	7.05821	0.00387119	0.0166468	1.463	0.612	0.851
ENSOCUG00000006867	ENSMUSG00000026576	MGI:88108	Atp1b1	768	6290	1273	5913	3939	3448	4711	14.25	102.447	18.774	102.153	72.667	78.011	93.835	P	P	3.83292	6.67873	4.23068	4.91411	6.67459	6.18323	6.2856	6.55205	6.42387	-0.0585197	1.43127	0.149711	1.08754	0.882728	0.925397	1.03646	-0.397846	0.758523	0.79352	0.686	0.983	-0.297
ENSOCUG00000002988	ENSMUSG00000041329	MGI:88109	Atp1b2	440	559	383	1464	1609	1236	2080	8.164	9.105	5.649	25.292	29.683	27.964	41.43	P	P	3.02932	3.18659	2.49787	2.90459	4.66062	4.89156	4.80552	5.3726	4.93258	-0.479209	-0.396875	-0.757425	0.248071	0.344334	0.308468	0.544842	-10.4725	0.00048955	0.0051647	-0.438	0.36125	-0.79925
ENSOCUG00000000338	ENSMUSG00000032412	MGI:107788	Atp1b3	3730	5051	4119	10033	9471	10058	9438	69.21	82.267	60.747	173.331	174.722	227.561	187.989	P	P	6.11292	6.36224	5.92475	6.1333	7.43739	7.44892	7.83011	7.5545	7.56773	1.13507	1.26559	1.03656	1.40549	1.41029	1.56918	1.4543	-3.41747	0.0929996	0.154291	1.2005	1.4595	-0.259
ENSOCUG00000001951	ENSMUSG00000025436	MGI:1916984	Atp23	110	120	94	344	308	266	464	2.041	1.954	1.386	5.943	5.682	6.018	9.242	A	P	1.02932	0.966779	0.471256	0.822451	2.57118	2.5064	2.58934	3.20822	2.71879	-1.52622	-1.55896	-1.81836	-0.62285	-0.649853	-0.615284	-0.357321	-13.9277	0.000460431	0.00496747	-1.5425	-0.56125	-0.98125
ENSOCUG00000015082	ENSMUSG00000029467	MGI:88110	Atp2a2	12489	13016	11751	10417	8564	6519	8878	231.734	211.995	173.304	179.965	157.99	147.492	176.834	P	P	7.85633	7.72789	7.43716	7.67379	7.49157	7.30369	7.20449	7.46626	7.3665	2.04775	1.98051	1.82832	1.42807	1.34976	1.30841	1.41752	14.5104	0.00166752	0.00969332	2.0145	1.376	0.6385
ENSOCUG00000014794	ENSMUSG00000020788	MGI:1194503	Atp2a3	2758	2423	3594	5986	7654	3904	4370	51.175	39.464	53.004	103.415	141.202	88.328	87.043	P	P	5.67736	5.30247	5.72804	5.56929	6.6923	7.14161	6.46479	6.44365	6.68559	0.907054	0.710794	0.933584	1.09492	1.2822	1.00009	0.991278	-2.37752	0.139062	0.205039	0.809	1.092	-0.283
ENSOCUG00000016507	ENSMUSG00000019943	MGI:104653	Atp2b1	6007	9434	7348	3436	2035	2232	3153	111.46	153.654	108.369	59.361	37.542	50.499	62.802	P	P	6.80039	7.26354	6.7598	6.94124	5.89143	5.23043	5.65818	5.97275	5.6882	1.49496	1.73742	1.47372	0.761101	0.48558	0.663874	0.794993	6.73768	0.0317407	0.0727307	1.616	0.6765	0.9395
ENSOCUG00000006539	ENSMUSG00000026463	MGI:88111	Atp2b4	9354	13884	11336	4356	3599	2379	3472	173.564	226.132	167.184	75.255	66.395	53.825	69.156	P	P	7.43933	7.82102	7.38529	7.54855	6.23371	6.053	5.75019	6.11179	6.03717	1.82945	2.02927	1.80116	0.903768	0.828444	0.702229	0.852949	10.1744	0.028556	0.0673857	1.929	0.82175	1.10725
ENSOCUG00000021839	ENSMUSG00000032570	MGI:1889008	Atp2c1	2738	5322	3113	2876	2038	1858	2986	50.804	86.681	45.911	49.686	37.597	42.037	59.476	P	P	5.66686	6.43764	5.52076	5.87509	5.63477	5.23255	5.39359	5.89423	5.53879	0.901557	1.30506	0.82507	0.654117	0.486466	0.553589	0.762268	2.32762	0.226206	0.295741	1.1035	0.614	0.4895
ENSOCUG00000006090	ENSMUSG00000025393	MGI:107801	Atp5b	13390	17794	12910	26804	21041	16517	18013	248.452	289.816	190.397	463.068	388.167	373.695	358.788	P	P	7.95683	8.17899	7.57287	7.9029	8.85508	8.60053	8.54572	8.48699	8.62208	2.10036	2.21667	1.89936	1.99641	1.89031	1.86746	1.84298	3.84297	0.0782429	0.136197	2.1585	1.899	0.2595
ENSOCUG00000004642	ENSMUSG00000025781	MGI:1261437	Atp5c1	2389	3040	2398	12041	9504	9394	12160	44.328	49.513	35.366	208.021	175.331	212.538	242.206	P	P	5.47015	5.62974	5.14428	5.41473	7.70059	7.45394	7.73158	7.92009	7.70155	0.798576	0.882125	0.627984	1.51519	1.41238	1.52811	1.60669	-11.7048	0.00158693	0.00943524	0.8405	1.5155	-0.675
ENSOCUG00000001042	ENSMUSG00000016252	MGI:1855697	Atp5e	1570	1806	1740	6494	7988	5429	3411	29.131	29.415	25.662	112.191	147.363	122.831	67.941	P	P	4.86451	4.87847	4.68154	4.80817	6.80981	7.20323	6.94053	6.08622	6.75995	0.48152	0.48883	0.385736	1.1439	1.30789	1.19838	0.84229	-6.39102	0.00770056	0.026637	0.4855	1.123	-0.6375
ENSOCUG00000024691	ENSMUSG00000000563	MGI:1100495	Atp5f1	2684	3968	2920	450	544	373	612	49.802	64.628	43.064	7.774	10.036	8.439	12.19	P	P	5.63813	6.01408	5.42842	5.69354	2.9587	3.32708	3.07709	3.60762	3.24262	0.886513	1.08333	0.776731	-0.461325	-0.307777	-0.411979	-0.19084	11.5638	0.010642	0.0335001	0.985	-0.343	1.328
ENSOCUG00000016225	ENSMUSG00000006057	MGI:107653	Atp5g1	694	1357	811	4226	4075	2919	3091	12.877	22.102	11.961	73.009	75.176	66.042	61.567	P	P	3.68675	4.46609	3.58023	3.91102	6.19	6.2322	6.04531	5.94409	6.1029	-0.135041	0.272949	-0.190806	0.885548	0.90314	0.825241	0.783051	-3.78994	0.157216	0.22413	0.069	0.84925	-0.78025
ENSOCUG00000008933	ENSMUSG00000062683	MGI:1915192	Atp5g2	435	494	408	14799	15877	10775	8184	8.071	8.046	6.017	255.669	292.901	243.783	163.011	P	P	3.01283	3.00826	2.58909	2.87006	7.99813	8.19427	7.92946	7.34883	7.86767	-0.487841	-0.490235	-0.709668	1.63922	1.72097	1.61059	1.36857	-27.3996	0.000106431	0.00246683	-0.489	1.585	-2.074
ENSOCUG00000012164	ENSMUSG00000018770	MGI:2442035	Atp5g3	1227	2608	1271	7589	5768	5502	5768	22.767	42.477	18.745	131.108	106.409	124.482	114.889	P	P	4.50888	5.40862	4.22842	4.7153	7.03461	6.73347	6.9598	6.84409	6.89299	0.295347	0.766364	0.148524	1.2376	1.11208	1.20642	1.15819	-2.73289	0.217877	0.287166	0.5305	1.1785	-0.648
ENSOCUG00000015537	ENSMUSG00000034566	MGI:1918929	Atp5h	1953	2978	1883	11096	8403	6372	6488	36.238	48.503	27.771	191.695	155.019	144.166	129.23	P	P	5.17943	5.60002	4.79548	5.19165	7.58267	7.27631	7.17159	7.01379	7.26109	0.646386	0.866562	0.445387	1.46605	1.33834	1.2947	1.22892	-4.74539	0.0763229	0.133764	0.7565	1.332	-0.5755
ENSOCUG00000006681	ENSMUSG00000022890	MGI:107777	Atp5j	889	1208	1019	2818	2188	2340	2905	16.495	19.675	15.028	48.684	40.364	52.942	57.863	P	P	4.044	4.29829	3.90961	4.08397	5.60538	5.33501	5.72635	5.85456	5.63032	0.05198	0.185105	-0.0183745	0.641866	0.529173	0.692289	0.745731	-6.58952	0.0211156	0.0545528	0.1185	0.65225	-0.53375
ENSOCUG00000022022	ENSMUSG00000038690	MGI:1927558	Atp5j2	1898	2139	1877	100	164	178	84	35.218	34.838	27.682	1.728	3.025	4.027	1.673	P	A	5.13822	5.12261	4.79088	5.01724	0.788776	1.59717	2.00979	0.742554	1.28457	0.624811	0.616638	0.442976	-1.3658	-1.02884	-0.856852	-1.38506	13.7138	0.000830772	0.00658749	0.621	-1.15925	1.78025
ENSOCUG00000024043	ENSMUSG00000050856	MGI:106636	Atp5k	891	1309	950	1548	1940	1062	538	16.533	21.32	14.011	26.743	35.789	24.028	10.716	P	P	4.04724	4.41414	3.80845	4.08994	4.74111	5.16146	4.58662	3.4217	4.47772	0.0536772	0.24575	-0.0713294	0.281621	0.456831	0.217228	-0.268338	-0.120568	0.909868	0.926537	0.15	0.172	-0.022
ENSOCUG00000029455	ENSMUSG00000038717	MGI:1351597	Atp5l	576	702	574	6510	5846	4752	4560	10.688	11.434	8.465	112.467	107.848	107.514	90.827	P	P	3.41788	3.51522	3.08157	3.33822	6.81336	6.75285	6.74837	6.50505	6.70491	-0.275793	-0.224839	-0.451852	1.14538	1.12016	1.11829	1.01687	-35.4242	2.17905e-05	0.00128144	-0.2505	1.1	-1.3505
ENSOCUG00000017262	ENSMUSG00000021290	MGI:1917507	Atp5mpl	633	1309	816	2597	2256	1678	2009	11.745	21.32	12.034	44.866	41.619	37.965	40.016	P	P	3.55402	4.41414	3.58909	3.85242	5.48755	5.37917	5.24658	5.3225	5.35895	-0.204525	0.24575	-0.186164	0.592754	0.547577	0.492313	0.523956	-2.29027	0.258581	0.328743	0.0205	0.53925	-0.51875
ENSOCUG00000003895	ENSMUSG00000022956	MGI:106341	Atp5o	1416	1811	1300	10051	8482	6187	7233	26.274	29.496	19.172	173.642	156.477	139.98	144.069	P	P	4.71556	4.88246	4.26096	4.61966	7.43997	7.28981	7.12908	7.17061	7.25737	0.403547	0.490918	0.165563	1.40656	1.34397	1.27698	1.29429	-16.8545	0.00373378	0.0161991	0.4475	1.3305	-0.883
ENSOCUG00000003348	ENSMUSG00000054894	MGI:1915305	Atp5s	110	155	130	1043	1228	1134	1554	2.041	2.525	1.917	18.019	22.654	25.657	30.953	A	P	1.02932	1.33601	0.939035	1.10146	4.17144	4.50171	4.68126	4.95201	4.57661	-1.52622	-1.36566	-1.57348	0.044172	0.181835	0.256674	0.369528	-15.7663	0.00132781	0.00855336	-1.446	0.21325	-1.65925
ENSOCUG00000017631	ENSMUSG00000019087	MGI:109629	Atp6ap1	4483	6914	5074	25974	18615	13256	21906	83.182	112.61	74.832	448.729	343.411	299.916	436.33	P	P	6.37821	6.81519	6.22558	6.47299	8.8097	8.42379	8.22841	8.76927	8.5578	1.27395	1.50271	1.19404	1.9775	1.81664	1.7352	1.96065	-3.76735	0.0932486	0.154457	1.3885	1.8725	-0.484
ENSOCUG00000014110	ENSMUSG00000078958	MGI:3648665	Atp6ap1l	8	2	2	484	510	206	271	0.148	0.033	0.029	8.362	9.409	4.661	5.398	A	P	-2.75204	-4.94011	-5.08333	-4.2585	3.06378	3.23397	2.22056	2.43239	2.73767	-3.50577	-4.65124	-4.72621	-0.417524	-0.346587	-0.769	-0.680705	-6.06218	0.0939698	0.155301	-4.0785	-0.55375	-3.52475
ENSOCUG00000015259	ENSMUSG00000031007	MGI:1917745	Atp6ap2	2673	4916	3082	22934	14330	16058	18796	49.598	80.068	45.453	396.21	264.361	363.311	374.384	P	P	5.6322	6.32316	5.50632	5.82056	8.63012	8.04637	8.50506	8.54837	8.43248	0.883411	1.24513	0.817511	1.90264	1.65932	1.85052	1.86857	-3.99961	0.124754	0.189134	1.064	1.8205	-0.7565
ENSOCUG00000015169	ENSMUSG00000019302	MGI:103286	Atp6v0a1	2904	6243	4157	4066	2083	1904	3256	53.884	101.681	61.308	70.245	38.427	43.078	64.854	P	P	5.75178	6.66791	5.93799	6.11923	6.13431	5.26406	5.42887	6.01912	5.71159	0.946013	1.42561	1.0435	0.862339	0.499599	0.568295	0.814324	1.95232	0.25542	0.325618	1.186	0.686	0.5
ENSOCUG00000005895	ENSMUSG00000033379	MGI:1890510	Atp6v0b	1666	3113	2199	14227	10169	6390	7991	30.913	50.702	32.431	245.787	187.599	144.573	159.167	P	P	4.95013	5.66398	5.0193	5.21114	7.94126	7.55151	7.17566	7.3144	7.49571	0.526344	0.900047	0.562554	1.61551	1.45305	1.29639	1.35422	-3.58942	0.127078	0.19179	0.713	1.42975	-0.71675
ENSOCUG00000007121	ENSMUSG00000024121	MGI:88116	Atp6v0c	479	854	615	35273	26128	18906	23434	8.888	13.909	9.07	609.379	482.012	427.746	466.765	P	P	3.15184	3.79798	3.18111	3.37698	9.2512	8.91293	8.74061	8.86655	8.94282	-0.415068	-0.0768107	-0.399745	2.16152	2.02052	1.9487	2.00119	-13.0226	0.0345304	0.0770713	-0.246	2.03325	-2.27925
ENSOCUG00000011850	ENSMUSG00000013160	MGI:1201778	Atp6v0d1	1438	3077	1958	6568	4219	3749	5022	26.682	50.116	28.877	113.469	77.833	84.821	100.03	P	P	4.73781	5.6472	4.85183	5.07895	6.82616	6.2823	6.40635	6.64428	6.53977	0.415191	0.891262	0.474885	1.15071	0.924023	0.975727	1.0749	-1.55548	0.348446	0.415818	0.653	1.0315	-0.3785
ENSOCUG00000010247	ENSMUSG00000028238	MGI:1924415	Atp6v0d2	2950	3586	5324	23387	14442	13174	35968	54.737	58.406	78.519	404.036	266.428	298.06	716.42	P	P	5.77446	5.86805	6.29496	5.97916	8.65834	8.0576	8.21946	9.48466	8.60502	0.957883	1.00688	1.23037	1.91441	1.664	1.73147	2.25884	-6.71282	0.00551539	0.0213483	0.9825	1.892	-0.9095
ENSOCUG00000006174	ENSMUSG00000015575	MGI:1328318	Atp6v0e	1381	1846	1823	9870	7348	6056	8574	25.625	30.066	26.886	170.515	135.557	137.016	170.779	P	P	4.67946	4.91008	4.74877	4.77943	7.41375	7.08275	7.0982	7.41599	7.25268	0.384645	0.505375	0.420929	1.39564	1.25767	1.26411	1.39657	-12.3369	0.00761782	0.0264166	0.445	1.32875	-0.88375
ENSOCUG00000014554	ENSMUSG00000039347	MGI:1923502	Atp6v0e2	227	1403	264	316	322	271	306	4.212	22.851	3.893	5.459	5.94	6.131	6.095	P	P	2.07451	4.51419	1.96106	2.84992	2.4487	2.57053	2.6162	2.60762	2.56077	-0.979056	0.298127	-1.03845	-0.673904	-0.623122	-0.604085	-0.607661	0.448957	0.73128	0.769406	-0.3405	-0.62725	0.28675
ENSOCUG00000006473	ENSMUSG00000052459	MGI:1201780	Atp6v1a	5554	10908	7626	11080	5726	6914	10556	103.055	177.662	112.469	191.419	105.634	156.429	210.257	P	P	6.68727	7.47299	6.81338	6.99121	7.58059	6.72293	7.28936	7.71601	7.32722	1.43574	1.84707	1.50176	1.46518	1.10769	1.34379	1.52162	1.25192	0.378293	0.444672	1.6415	1.35975	0.28175
ENSOCUG00000001013	ENSMUSG00000006273	MGI:109618	Atp6v1b2	3926	10735	5870	21088	13912	10301	13166	72.847	174.844	86.571	364.318	256.65	233.059	262.244	P	P	6.1868	7.44992	6.43581	6.69085	8.50905	8.00366	7.86455	8.03477	8.10301	1.17375	1.835	1.3041	1.85218	1.64152	1.58354	1.65449	-0.53186	0.684537	0.728181	1.5045	1.683	-0.1785
ENSOCUG00000012018	ENSMUSG00000021114	MGI:1921084	Atp6v1d	1072	1896	1311	8672	5778	5176	7834	19.891	30.881	19.335	149.818	106.593	117.106	156.04	P	P	4.31405	4.94863	4.27312	4.51193	7.22707	6.73597	6.87168	7.28577	7.03012	0.193352	0.52556	0.171926	1.31782	1.11312	1.16969	1.34229	-4.98944	0.0914977	0.152554	0.3595	1.23575	-0.87625
ENSOCUG00000006964	ENSMUSG00000019210	MGI:894326	Atp6v1e1	1865	3855	2366	6598	3813	3738	6078	34.605	62.787	34.894	113.988	70.343	84.572	121.063	P	P	5.11292	5.9724	5.1249	5.40341	6.83273	6.13633	6.40211	6.91962	6.5727	0.611564	1.06151	0.617838	1.15345	0.863178	0.97396	1.18967	-0.874834	0.51821	0.576269	0.837	1.045	-0.208
ENSOCUG00000014136	ENSMUSG00000004285	MGI:1913394	Atp6v1f	1023	1788	1255	5947	5264	3870	3571	18.982	29.122	18.509	102.741	97.111	87.558	71.128	P	P	4.24655	4.86402	4.21014	4.44024	6.68287	6.60156	6.45217	6.15235	6.47224	0.158016	0.481265	0.138956	1.09099	1.0571	0.994829	0.869856	-4.05374	0.123232	0.18729	0.3195	1.00325	-0.68375
ENSOCUG00000026252	ENSMUSG00000039105	MGI:1913540	Atp6v1g1	1598	2535	2014	7657	6126	6189	5962	29.651	41.288	29.703	132.283	113.013	140.025	118.753	P	P	4.89001	5.36766	4.89252	5.05006	7.04748	6.82035	7.12955	6.89182	6.9723	0.494871	0.744922	0.496183	1.24297	1.14829	1.27717	1.17808	-4.60555	0.117048	0.180861	0.62	1.2115	-0.5915
ENSOCUG00000016298	ENSMUSG00000033793	MGI:1914864	Atp6v1h	2273	3925	2785	13296	7412	7973	10930	42.176	63.928	41.073	229.703	136.737	180.388	217.707	P	P	5.39834	5.99837	5.36013	5.58561	7.84362	7.09526	7.49496	7.76624	7.55002	0.760984	1.0751	0.74098	1.57482	1.26288	1.42949	1.54256	-3.10564	0.135277	0.201075	0.918	1.4525	-0.5345
ENSOCUG00000014160	ENSMUSG00000033792	MGI:99400	Atp7a	1836	6027	2271	3995	2050	2387	3188	34.067	98.163	33.493	69.018	37.819	54.006	63.499	P	P	5.09031	6.61711	5.06578	5.59107	6.1089	5.24102	5.75504	5.98867	5.77341	0.599728	1.39902	0.586887	0.851745	0.489996	0.704248	0.801632	0.705597	0.60146	0.653676	0.9995	0.712	0.2875
ENSOCUG00000013152	ENSMUSG00000037685	MGI:1330848	Atp8a1	2169	5384	2929	3601	2165	2172	3098	40.246	87.691	43.197	62.211	39.94	49.141	61.707	P	P	5.33077	6.45435	5.43286	5.73933	5.9591	5.31977	5.61886	5.94736	5.71127	0.725612	1.31381	0.779055	0.789306	0.522818	0.647488	0.784411	1.11132	0.453703	0.514775	1.02	0.68575	0.33425
ENSOCUG00000009625	ENSMUSG00000039529	MGI:1859665	Atp8b1	2782	3148	3379	2058	1686	1574	2107	51.62	51.272	49.834	35.554	31.104	35.612	41.968	P	P	5.68986	5.68011	5.63905	5.66967	5.15195	4.95901	5.15427	5.39121	5.16411	0.913598	0.908491	0.886995	0.452867	0.372445	0.453837	0.552597	12.1907	0.00111613	0.0077881	0.911	0.458	0.453
ENSOCUG00000016320	ENSMUSG00000060671	MGI:1859660	Atp8b2	3394	4084	3844	5536	6062	4205	4605	62.976	66.517	56.691	95.64	111.832	95.138	91.724	P	P	5.97673	6.05566	5.82506	5.95248	6.57955	6.80519	6.57195	6.51922	6.61898	1.06377	1.10509	0.984373	1.04792	1.14198	1.04475	1.02278	0.59797	0.584617	0.637436	1.0845	1.0645	0.02
ENSOCUG00000008075	ENSMUSG00000060131	MGI:1859664	Atp8b4	639	1124	744	726	213	309	426	11.857	18.307	10.973	12.542	3.929	6.991	8.485	P	P	3.56763	4.19431	3.45583	3.73926	3.64875	1.97433	2.80552	3.08495	2.87838	-0.1974	0.130672	-0.25593	-0.1737	-0.871634	-0.525175	-0.408703	2.10833	0.137682	0.2035	-0.033	-0.495	0.462
ENSOCUG00000007132	ENSMUSG00000024566	MGI:1354757	Atp9b	2656	3329	3285	1280	978	619	728	49.282	54.22	48.447	22.113	18.042	14.005	14.501	P	P	5.623	5.76076	5.59835	5.6607	4.46685	4.17331	3.80785	3.85803	4.07651	0.878593	0.950713	0.865687	0.167303	0.0449488	-0.107381	-0.0864649	12.4427	0.000240355	0.0035838	0.915	0.00475	0.91025
ENSOCUG00000009230	ENSMUSG00000028710	MGI:2180560	Atpaf1	255	331	324	1739	1151	862	1592	4.732	5.391	4.778	30.043	21.234	19.503	31.71	A	P	2.24231	2.43058	2.25652	2.3098	4.90896	4.40829	4.2856	4.98686	4.64743	-0.89121	-0.792653	-0.883773	0.351586	0.142894	0.0917545	0.384056	-12.2972	0.00027887	0.00386957	-0.842	0.24275	-1.08475
ENSOCUG00000004373	ENSMUSG00000042709	MGI:2180561	Atpaf2	426	419	481	882	642	585	519	7.904	6.824	7.094	15.238	11.844	13.236	10.338	P	P	2.98267	2.77069	2.82656	2.85997	3.92955	3.56605	3.72635	3.36983	3.64794	-0.50363	-0.614599	-0.585353	-0.0566523	-0.208171	-0.141353	-0.289959	-5.18424	0.0186212	0.0501601	-0.5595	-0.174	-0.3855
ENSOCUG00000001211	ENSMUSG00000054428	MGI:1196457	Atpif1	568	1380	673	254	192	204	64	10.539	22.476	9.925	4.388	3.542	4.615	1.275	P	A	3.3977	4.49034	3.31113	3.73306	2.1336	1.82458	2.20648	0.350236	1.62873	-0.286357	0.285643	-0.331679	-0.805243	-0.934051	-0.774867	-1.54859	3.00076	0.103913	0.166298	0	-1.01575	1.01575
ENSOCUG00000001874	ENSMUSG00000032409	MGI:108028	Atr	1238	1697	1328	1403	996	1067	1433	22.971	27.639	19.585	24.238	18.374	24.141	28.543	P	P	4.52175	4.78866	4.29171	4.53404	4.59922	4.19962	4.5934	4.83506	4.55682	0.302087	0.441814	0.181657	0.222478	0.0559159	0.220052	0.320781	1.88002	0.183208	0.251811	0.372	0.20475	0.16725
ENSOCUG00000024551	ENSMUSG00000013622	MGI:1918918	Atraid	1057	1093	1068	2204	2382	1693	1906	19.613	17.802	15.751	38.076	43.943	38.304	37.964	P	P	4.29372	4.15397	3.97736	4.14168	5.25083	5.45757	5.25942	5.24657	5.3036	0.182709	0.109549	0.0170969	0.494083	0.580259	0.497664	0.492307	-8.73614	0.0195212	0.0518177	0.1465	0.516	-0.3695
ENSOCUG00000012655	ENSMUSG00000027312	MGI:1341628	Atrn	2402	3794	2858	2076	1788	1263	1863	44.569	61.794	42.15	35.865	32.985	28.575	37.108	P	P	5.47798	5.94939	5.39746	5.60828	5.16451	5.04375	4.83669	5.21365	5.06465	0.802675	1.04946	0.760522	0.458104	0.407767	0.321463	0.478585	3.98289	0.128473	0.193461	0.926	0.4165	0.5095
ENSOCUG00000005958	ENSMUSG00000054843	MGI:2147749	Atrnl1	4503	9945	4578	160	204	248	194	83.554	161.977	67.517	2.764	3.763	5.611	3.864	P	A	6.38463	7.33964	6.07717	6.60048	1.46685	1.91204	2.48825	1.95015	1.95432	1.27731	1.77726	1.11635	-1.08316	-0.897595	-0.657418	-0.881711	9.09076	0.0427204	0.0893162	1.527	-0.88	2.407
ENSOCUG00000007579	ENSMUSG00000031229	MGI:103067	Atrx	7165	8909	8634	7300	6609	6935	7244	132.947	145.103	127.335	126.115	121.924	156.904	144.288	P	P	7.05471	7.18094	6.99248	7.07604	6.9786	6.92983	7.29374	7.17281	7.09374	1.6281	1.69418	1.59552	1.21426	1.19393	1.34561	1.2952	8.23424	0.00289556	0.013699	1.661	1.26225	0.39875
ENSOCUG00000015360	ENSMUSG00000046876	MGI:104783	Atxn1	2611	3261	3341	570	401	231	193	48.447	53.113	49.273	9.847	7.398	5.226	3.844	P	P	5.59834	5.73099	5.62273	5.65069	3.29974	2.88707	2.3858	1.94269	2.62883	0.865687	0.935126	0.878454	-0.319173	-0.49118	-0.700121	-0.884819	11.7208	0.000695361	0.00615448	0.9005	-0.59875	1.49925
ENSOCUG00000007250	ENSMUSG00000016541	MGI:1859293	Atxn10	1560	3516	1845	2069	1403	1624	1636	28.946	57.266	27.21	35.744	25.883	36.743	32.586	P	P	4.85529	5.83961	4.76607	5.15366	5.15964	4.69392	5.19939	5.02619	5.01978	0.476694	0.991989	0.429989	0.456073	0.26195	0.472643	0.40045	1.28575	0.41021	0.474674	0.7345	0.39775	0.33675
ENSOCUG00000021960	ENSMUSG00000069895	MGI:3694797	Atxn1l	1888	2480	2062	526	304	196	305	35.032	40.392	30.41	9.087	5.608	4.434	6.075	P	P	5.1306	5.33601	4.9265	5.13104	3.18384	2.48754	2.14876	2.6029	2.60576	0.620821	0.728355	0.513972	-0.367483	-0.657713	-0.798924	-0.60963	12.2603	0.00025519	0.00371451	0.6745	-0.6085	1.283
ENSOCUG00000002677	ENSMUSG00000032637	MGI:2446242	Atxn2l	1752	2461	2599	5204	4308	2727	3550	32.508	40.083	38.33	89.905	79.474	61.698	70.71	P	P	5.02274	5.32492	5.26041	5.20269	6.49033	6.31242	5.94715	6.14384	6.22343	0.564358	0.722547	0.688776	1.01073	0.936576	0.784326	0.866309	-2.74798	0.123956	0.1881	0.6435	0.8995	-0.256
ENSOCUG00000005701	ENSMUSG00000021189	MGI:1099442	Atxn3	1231	1689	1422	328	230	228	242	22.841	27.509	20.972	5.667	4.243	5.158	4.82	P	A	4.51357	4.78184	4.39037	4.56193	2.50247	2.08511	2.36694	2.2691	2.30591	0.297805	0.438245	0.233309	-0.651491	-0.825458	-0.707982	-0.748766	13.942	0.0120912	0.0369535	0.368	-0.73325	1.10125
ENSOCUG00000000803	ENSMUSG00000021738	MGI:2179277	Atxn7	1114	1457	1379	541	399	233	334	20.67	23.731	20.338	9.346	7.361	5.272	6.653	P	P	4.36949	4.56867	4.34607	4.42808	3.2244	2.87986	2.39824	2.73394	2.80911	0.222377	0.32665	0.210118	-0.350574	-0.494187	-0.694937	-0.55501	9.01408	0.00107067	0.00760369	0.2745	-0.52375	0.79825
ENSOCUG00000010480	ENSMUSG00000020564	MGI:3584458	Atxn7l1	547	801	738	485	277	164	314	10.15	13.046	10.884	8.379	5.11	3.71	6.254	P	P	3.34335	3.70555	3.44414	3.49768	3.06676	2.35336	1.89161	2.64486	2.48915	-0.314809	-0.1252	-0.262045	-0.416283	-0.713645	-0.906113	-0.592142	3.11708	0.0473504	0.0955952	-0.22	-0.657	0.437
ENSOCUG00000008613	ENSMUSG00000059995	MGI:3036270	Atxn7l3	1215	2242	1691	769	596	482	490	22.544	36.516	24.939	13.285	10.995	10.905	9.76	P	P	4.4947	5.19046	4.64033	4.77516	3.73176	3.45878	3.44694	3.28687	3.48109	0.287924	0.652157	0.364162	-0.139098	-0.252879	-0.257815	-0.324535	3.83645	0.145893	0.212028	0.47	-0.24375	0.71375
ENSOCUG00000026605	ENSMUSG00000078584	MGI:2140466	AU022252	580	880	730	158	220	156	115	10.762	14.333	10.766	2.73	4.059	3.529	2.291	P	A	3.42787	3.84125	3.42842	3.56585	1.4487	2.02098	1.81946	1.19573	1.62122	-0.270567	-0.05416	-0.270277	-1.09073	-0.852189	-0.936186	-1.19617	6.43358	0.0209503	0.0542411	-0.1625	-1.01875	0.85625
ENSOCUG00000013172	ENSMUSG00000028830	MGI:2140475	AU040320	987	1446	1367	980	652	616	809	18.314	23.551	20.161	16.931	12.028	13.937	16.114	P	P	4.19486	4.55774	4.33346	4.36202	4.08156	3.58834	3.80084	4.01023	3.87024	0.130959	0.320927	0.203517	0.00670581	-0.198876	-0.110303	-0.0230242	2.9057	0.138762	0.204661	0.226	-0.08125	0.30725
ENSOCUG00000007430	ENSMUSG00000021460	MGI:1338011	Auh	870	1214	962	1669	1164	1297	1255	16.143	19.773	14.188	28.834	21.474	29.344	24.997	P	P	4.01283	4.30544	3.82656	4.04828	4.84969	4.42449	4.87502	4.64371	4.69823	0.0356634	0.188847	-0.061849	0.326879	0.149648	0.337437	0.241022	-1.71763	0.249773	0.319845	0.1125	0.26375	-0.15125
ENSOCUG00000015388	ENSMUSG00000068328	MGI:107789	Aup1	883	1337	1284	6586	5521	4425	4914	16.384	21.776	18.936	113.78	101.852	100.115	97.878	P	P	4.03423	4.44467	4.2431	4.24067	6.83011	6.67033	6.64552	6.61292	6.68972	0.0468654	0.261735	0.156209	1.15236	1.08576	1.07542	1.06183	-8.58943	0.0643727	0.118686	0.1545	1.09375	-0.93925
ENSOCUG00000023874	ENSMUSG00000065990	MGI:1913327	Aurkaip1	631	931	796	1934	2748	1957	715	11.708	15.163	11.739	33.412	50.695	44.277	14.242	P	P	3.54945	3.92253	3.55329	3.67509	5.06229	5.66378	5.46848	3.83204	5.00665	-0.206915	-0.0116108	-0.204906	0.415497	0.666211	0.584806	-0.0973003	-2.54602	0.0635822	0.117579	-0.1095	0.39225	-0.50175
ENSOCUG00000012517	ENSMUSG00000025432	MGI:1333798	Avil	192	3374	350	8	15	0	2	3.563	54.953	5.162	0.138	0.277	0	0.04	P	A	1.83292	5.78013	2.36788	3.32698	-2.85508	-1.85349	-5.46595	-4.64976	-3.70607	-1.10553	0.960854	-0.825475	-2.88463	-2.46715	-3.9729	-3.6327	2.908	0.172048	0.240058	-0.0725	-3.2395	3.167
ENSOCUG00000012508	ENSMUSG00000029787	MGI:1926187	Avl9	1276	2479	1699	605	330	204	341	23.676	40.376	25.057	10.452	6.088	4.615	6.792	P	P	4.56537	5.33543	4.64714	4.84931	3.38571	2.60594	2.20648	2.76386	2.7405	0.324921	0.728051	0.367726	-0.283338	-0.608364	-0.774867	-0.542537	4.7747	0.0662586	0.121087	0.5265	-0.55225	1.07875
ENSOCUG00000007821	ENSMUSG00000018821	MGI:1916784	Avpi1	207	285	264	1850	1759	1642	1060	3.841	4.642	3.893	31.961	32.45	37.15	21.113	A	P	1.94144	2.21471	1.96106	2.03907	4.99823	5.02016	5.21529	4.40009	4.90844	-1.04871	-0.905661	-1.03845	0.388794	0.397934	0.479271	0.139475	-12.9504	0.000861516	0.00666229	-0.9775	0.35125	-1.32875
ENSOCUG00000012089	ENSMUSG00000039182	MGI:2145422	AW209491	216	369	248	729	516	457	788	4.008	6.01	3.658	12.594	9.519	10.34	15.696	A	P	2.00285	2.58737	1.87086	2.15369	3.65469	3.25084	3.37011	3.97229	3.56198	-1.01657	-0.710573	-1.08566	-0.17122	-0.339554	-0.289843	-0.0388401	-3.9144	0.101775	0.163956	-0.864	-0.21	-0.654
ENSOCUG00000009242	ENSMUSG00000041935	MGI:2146232	AW549877	2188	2917	2313	335	219	195	341	40.599	47.51	34.112	5.787	4.04	4.412	6.792	P	P	5.34335	5.57016	5.09222	5.33524	2.53294	2.0144	2.14139	2.76386	2.36315	0.732199	0.850931	0.600727	-0.638792	-0.854928	-0.802	-0.542537	16.0566	0.000194002	0.00319841	0.7915	-0.70975	1.50125
ENSOCUG00000000711	ENSMUSG00000033632	MGI:2147376	AW554918	471	535	604	43	26	36	45	8.739	8.714	8.908	0.743	0.48	0.814	0.896	P	A	3.12754	3.12328	3.15507	3.1353	-0.428815	-1.05994	-0.29602	-0.15791	-0.485672	-0.427789	-0.430017	-0.413376	-1.87331	-2.13638	-1.81796	-1.7604	17.6783	0.000393934	0.00458348	-0.429	-1.89675	1.46775
ENSOCUG00000023437	ENSMUSG00000024182	MGI:1096327	Axin1	927	1161	1336	939	1215	896	608	17.201	18.91	19.703	16.222	22.414	20.272	12.11	P	P	4.10438	4.24104	4.30037	4.21527	4.0199	4.48636	4.34141	3.59816	4.11146	0.0835923	0.155133	0.186193	-0.018994	0.175435	0.115018	-0.194783	1.12412	0.3265	0.394762	0.1195	0.019	0.1005
ENSOCUG00000016651	ENSMUSG00000002602	MGI:1347244	Axl	12831	14058	14840	7501	7287	5627	5932	238.08	228.966	218.861	129.588	134.431	127.31	118.155	P	P	7.8953	7.83899	7.77387	7.83606	7.01779	7.07073	6.99221	6.88454	6.99131	2.06815	2.03868	2.00458	1.23059	1.25265	1.21993	1.17505	38.0627	1.49311e-05	0.00113022	2.0535	1.21975	0.83375
ENSOCUG00000014956	ENSMUSG00000039285	MGI:1351332	Azi2	1708	2647	1982	1315	765	774	1424	31.692	43.112	29.231	22.718	14.113	17.512	28.364	P	P	4.98605	5.43003	4.86941	5.09516	4.50577	3.81893	4.13024	4.82597	4.32023	0.545148	0.777574	0.484086	0.183525	-0.102762	0.0269995	0.316993	3.7478	0.0508969	0.100136	0.6615	0.10625	0.55525
ENSOCUG00000015196	ENSMUSG00000037458	MGI:1859169	Azin1	2976	4974	3514	4759	4551	5477	5315	55.22	81.013	51.825	82.217	83.957	123.917	105.866	P	P	5.78712	6.34008	5.69557	5.94092	6.36136	6.39158	6.95323	6.72609	6.60807	0.96451	1.25399	0.916583	0.956977	0.969574	1.20368	1.109	0.317103	0.793224	0.825738	1.1095	1.06	0.0495
ENSOCUG00000009989	ENSMUSG00000028789	MGI:2442093	Azin2	324	1364	471	85	100	89	21	6.012	22.216	6.946	1.468	1.845	2.014	0.418	P	A	2.58781	4.47352	2.79625	3.28586	0.554311	0.883473	1.00979	-1.25745	0.297531	-0.710341	0.276835	-0.60122	-1.46353	-1.32632	-1.27367	-2.21871	2.50683	0.178223	0.246667	-0.2165	-1.57075	1.35425
ENSOCUG00000006998	ENSMUSG00000027165	MGI:1915420	B230118H07Rik	338	464	292	276	376	236	407	6.272	7.557	4.306	4.768	6.936	5.339	8.107	P	P	2.64884	2.91787	2.10649	2.55773	2.25344	2.79421	2.4167	3.01912	2.62087	-0.678392	-0.537552	-0.962312	-0.755291	-0.52989	-0.687243	-0.43614	-0.0594638	0.956196	0.964126	-0.608	-0.602	-0.006
ENSOCUG00000012220	ENSMUSG00000045767	MGI:1925771	B230219D22Rik	3056	3942	3163	1064	812	659	963	56.704	64.204	46.648	18.382	14.98	14.91	19.181	P	P	5.82539	6.0046	5.54375	5.79124	4.2002	3.90495	3.89819	4.26163	4.06624	0.984544	1.07836	0.837104	0.0561594	-0.0669072	-0.069726	0.0817631	16.8037	0.00108309	0.00763975	1.0315	0.00025	1.03125
ENSOCUG00000017117	ENSMUSG00000060802	MGI:88127	B2m	12919	22310	15060	46163	30323	42053	37488	239.713	363.369	222.106	797.516	559.402	951.445	746.696	P	P	7.90516	8.50529	7.7951	8.06852	9.63937	9.12774	9.89398	9.54438	9.55137	2.07332	2.38749	2.0157	2.32332	2.11006	2.42945	2.28373	-0.331501	0.783723	0.816808	2.23	2.2865	-0.0565
ENSOCUG00000001174	ENSMUSG00000043300	MGI:1349405	B3galnt1	632	1249	789	333	183	235	358	11.727	20.343	11.636	5.753	3.376	5.317	7.131	P	P	3.55174	4.34645	3.54055	3.81291	2.5243	1.75532	2.41057	2.83405	2.38106	-0.205719	0.210313	-0.211577	-0.642393	-0.962922	-0.689797	-0.513281	3.08045	0.135398	0.201143	0.002	-0.702	0.704
ENSOCUG00000017502	ENSMUSG00000039242	MGI:2145517	B3galnt2	1827	1727	1855	968	924	622	652	33.9	28.128	27.358	16.723	17.046	14.073	12.987	P	P	5.08322	4.81394	4.77387	4.89034	4.06378	4.09137	3.81483	3.69896	3.91723	0.596017	0.455049	0.434072	-0.000703067	0.0107938	-0.104474	-0.152767	7.24974	0.0288262	0.0678259	0.5255	-0.06175	0.58725
ENSOCUG00000001623	ENSMUSG00000034780	MGI:1349403	B3galt1	672	1244	666	6	14	4	18	12.469	20.261	9.822	0.104	0.258	0.09	0.359	P	A	3.64028	4.34066	3.29605	3.75899	-3.27012	-1.95303	-3.46595	-1.47984	-2.54223	-0.15937	0.207284	-0.339576	-3.05763	-2.50864	-3.13925	-2.3114	10.1516	0.00131195	0.0084849	0.024	-2.75425	2.77825
ENSOCUG00000001596	ENSMUSG00000033849	MGI:1349461	B3galt2	918	717	727	2	8	14	25	17.034	11.678	10.722	0.035	0.148	0.317	0.498	P	A	4.09031	3.54572	3.42248	3.68617	-4.85508	-2.76038	-1.65859	-1.00591	-2.56999	0.0762239	-0.208871	-0.273387	-3.71828	-2.84516	-2.38591	-2.11386	7.11784	0.00258749	0.0128227	-0.0665	-2.76575	2.69925
ENSOCUG00000010550	ENSMUSG00000067370	MGI:1859517	B3galt4	71	95	75	1066	1096	759	516	1.317	1.547	1.106	18.416	20.219	17.172	10.278	A	P	0.397705	0.629744	0.145486	0.390978	4.20291	4.33765	4.10201	3.36146	4.00101	-1.85687	-1.7354	-1.98891	0.0572887	0.11345	0.0152311	-0.293445	-16.1583	9.78637e-05	0.0023923	-1.796	-0.027	-1.769
ENSOCUG00000017246	ENSMUSG00000071649	MGI:1919977	B3gat3	613	1107	728	1021	1349	816	771	11.374	18.03	10.737	17.639	24.886	18.462	15.357	P	P	3.5077	4.17233	3.42446	3.7015	4.14069	4.63729	4.20648	3.94082	4.23132	-0.228773	0.119162	-0.272349	0.0313521	0.238347	0.0587762	-0.0519553	-0.672437	0.60355	0.655435	-0.055	0.069	-0.124
ENSOCUG00000014798	ENSMUSG00000051950	MGI:2685903	B3glct	629	775	694	1760	2059	1872	2260	11.671	12.623	10.235	30.406	37.985	42.354	45.015	P	P	3.54487	3.65794	3.35546	3.51942	4.92628	5.24734	5.40442	5.49234	5.2676	-0.209313	-0.150122	-0.308472	0.358804	0.492631	0.558103	0.594751	-11.4046	0.000337529	0.00427492	-0.1795	0.50125	-0.68075
ENSOCUG00000017281	ENSMUSG00000051650	MGI:1889505	B3gnt2	16	49	19	1431	1132	720	1047	0.297	0.798	0.28	24.722	20.883	16.29	20.854	A	P	-1.75204	-0.325402	-1.83541	-1.30428	4.62773	4.38427	4.02591	4.38228	4.35505	-2.98227	-2.23542	-3.02591	0.234361	0.132885	-0.0164902	0.132054	-7.23879	0.0816198	0.140201	-2.6085	0.12075	-2.72925
ENSOCUG00000008691	ENSMUSG00000022686	MGI:2137302	B3gnt5	335	336	243	472	172	274	361	6.216	5.473	3.584	8.154	3.173	6.199	7.19	P	P	2.63598	2.45221	1.84148	2.30989	3.02756	1.66588	2.63209	2.84609	2.54291	-0.685125	-0.781329	-1.10105	-0.432622	-1.0002	-0.597465	-0.508263	-0.728716	0.509637	0.567644	-0.733	-0.6345	-0.0985
ENSOCUG00000011512	ENSMUSG00000079445	MGI:2384394	B3gnt7	75	107	131	815	787	524	278	1.392	1.743	1.932	14.08	14.519	11.855	5.537	A	P	0.476776	0.801356	0.95009	0.742741	3.81558	3.85984	3.56748	2.46918	3.42802	-1.81547	-1.64556	-1.56769	-0.104161	-0.0857126	-0.207574	-0.665369	-9.15928	0.000805722	0.00648486	-1.7305	-0.26575	-1.46475
ENSOCUG00000027388	ENSMUSG00000059479	MGI:2385269	B3gnt8	250	303	301	545	644	333	132	4.639	4.935	4.439	9.415	11.881	7.534	2.629	A	P	2.21374	2.30306	2.15029	2.22236	3.23503	3.57053	2.91343	1.39463	2.77841	-0.906166	-0.859406	-0.939385	-0.346144	-0.2063	-0.480194	-1.11326	-1.71754	0.181955	0.250478	-0.8825	-0.53625	-0.34625
ENSOCUG00000017245	ENSMUSG00000046605	MGI:2441705	B3gntl1	301	330	383	269	234	211	168	5.585	5.375	5.649	4.647	4.317	4.774	3.346	P	A	2.48158	2.42621	2.49787	2.46855	2.21638	2.10998	2.25515	1.74255	2.08102	-0.765953	-0.794938	-0.757425	-0.770739	-0.81509	-0.754578	-0.968241	0.921764	0.416079	0.479981	-0.7805	-0.82725	0.04675
ENSOCUG00000014121	ENSMUSG00000006731	MGI:1342057	B4galnt1	381	651	550	111	200	46	24	7.069	10.603	8.111	1.918	3.69	1.041	0.478	P	A	2.8216	3.4064	3.01996	3.08265	0.939336	1.88347	0.0576169	-1.0648	0.453906	-0.587947	-0.281804	-0.48411	-1.30304	-0.909503	-1.67056	-2.13841	3.52936	0.0242487	0.0601551	-0.435	-1.5055	1.0705
ENSOCUG00000008418	ENSMUSG00000041372	MGI:3041155	B4galnt3	105	147	173	354	428	418	379	1.948	2.394	2.551	6.116	7.896	9.457	7.549	A	P	0.962203	1.25956	1.3513	1.19102	2.61253	2.98108	3.24141	2.91629	2.93783	-1.56135	-1.40568	-1.35766	-0.605618	-0.451996	-0.343484	-0.479003	-10.7278	0.00790819	0.0271238	-1.4835	-0.47	-1.0135
ENSOCUG00000022234	ENSMUSG00000028413	MGI:95705	B4galt1	3599	4365	4335	8712	4907	5709	6211	66.78	71.094	63.933	150.509	90.525	129.166	123.712	P	P	6.06134	6.15165	5.99848	6.07049	7.23371	6.50024	7.01308	6.95085	6.92447	1.10807	1.15535	1.07516	1.32059	1.01487	1.22863	1.20269	-0.884942	0.430476	0.492848	1.1315	1.192	-0.0605
ENSOCUG00000005897	ENSMUSG00000028541	MGI:1858493	B4galt2	579	722	645	1643	2161	1419	1375	10.743	11.759	9.512	28.385	39.866	32.105	27.388	P	P	3.42538	3.55574	3.24982	3.41031	4.82704	5.3171	5.00471	4.77545	4.98108	-0.27187	-0.203623	-0.363774	0.317437	0.521706	0.391497	0.295936	-10.097	0.000590368	0.00563543	-0.238	0.3815	-0.6195
ENSOCUG00000029610	ENSMUSG00000052423	MGI:1928767	B4galt3	325	409	365	489	363	266	301	6.03	6.661	5.383	8.448	6.697	6.018	5.995	P	P	2.59225	2.73585	2.42842	2.58551	3.07861	2.74344	2.58934	2.58386	2.74881	-0.708014	-0.632843	-0.793781	-0.411344	-0.55105	-0.615284	-0.617568	-1.98729	0.123652	0.187697	-0.6705	-0.54875	-0.12175
ENSOCUG00000008301	ENSMUSG00000022793	MGI:1928387	B4galt4	270	317	293	1141	1088	848	1159	5.01	5.163	4.321	19.712	20.072	19.186	23.085	A	P	2.32477	2.36823	2.11142	2.26814	4.301	4.32708	4.26198	4.5289	4.35474	-0.848041	-0.825292	-0.95973	0.0981752	0.109044	0.0819077	0.193168	-35.0148	5.22262e-06	0.00072572	-0.8365	0.1205	-0.957
ENSOCUG00000005982	ENSMUSG00000017929	MGI:1927169	B4galt5	2054	3655	3112	1708	1566	1345	1662	38.112	59.53	45.896	29.508	28.89	30.43	33.104	P	P	5.25218	5.89554	5.52029	5.55601	4.88301	4.85248	4.92745	5.04894	4.92797	0.684468	1.02127	0.824827	0.340769	0.328045	0.35929	0.409932	2.90928	0.206248	0.275306	0.8525	0.3595	0.493
ENSOCUG00000013287	ENSMUSG00000056124	MGI:1928380	B4galt6	1215	2883	1741	292	157	144	253	22.544	46.956	25.676	5.045	2.896	3.258	5.039	P	A	4.4947	5.55324	4.68237	4.9101	2.33474	1.53424	1.70398	2.33323	1.97655	0.287924	0.842076	0.38617	-0.721403	-1.05507	-0.98432	-0.722035	4.94297	0.0960148	0.157484	0.565	-0.8705	1.4355
ENSOCUG00000003023	ENSMUSG00000021504	MGI:2384987	B4galt7	330	488	482	662	631	398	435	6.123	7.948	7.109	11.437	11.641	9.005	8.664	P	P	2.61428	2.99063	2.82956	2.81149	3.51561	3.54111	3.17068	3.11511	3.33563	-0.696483	-0.499464	-0.583784	-0.229194	-0.218563	-0.372968	-0.396131	-2.69103	0.157074	0.224013	-0.5975	-0.30425	-0.29325
ENSOCUG00000027387	ENSMUSG00000047379	MGI:1919680	B4gat1	532	1056	652	974	1274	906	756	9.871	17.199	9.616	16.827	23.503	20.498	15.058	P	P	3.30324	4.10428	3.2654	3.55764	4.0727	4.55477	4.35742	3.91248	4.22434	-0.335809	0.0835396	-0.355621	0.00301278	0.203949	0.121692	-0.0637699	-0.880369	0.522801	0.580161	-0.126	0.06625	-0.19225
ENSOCUG00000010695	ENSMUSG00000052139	MGI:1333875	Babam2	421	550	545	2097	1615	1459	2339	7.812	8.958	8.038	36.228	29.794	33.01	46.589	P	P	2.96563	3.16318	3.00678	3.0452	5.17903	4.89693	5.04482	5.54191	5.16567	-0.512547	-0.409133	-0.491007	0.464156	0.346572	0.408214	0.615413	-11.8746	0.000816541	0.00652093	-0.461	0.4585	-0.9195
ENSOCUG00000022776	ENSMUSG00000032086	MGI:1346542	Bace1	2028	3051	2431	970	916	632	760	37.63	49.692	35.852	16.758	16.898	14.299	15.138	P	P	5.2338	5.63495	5.164	5.34425	4.06676	4.07882	3.83784	3.92009	3.97588	0.674846	0.884853	0.638307	0.000538102	0.00556465	-0.0948828	-0.0605966	7.57892	0.0682943	0.12354	0.78	-0.03725	0.81725
ENSOCUG00000028198	ENSMUSG00000040605	MGI:1860440	Bace2	682	534	657	3965	3209	2246	1790	12.655	8.697	9.689	68.5	59.2	50.816	35.654	P	P	3.66159	3.12058	3.27642	3.35286	6.09803	5.88752	5.6672	5.15598	5.70218	-0.148214	-0.43143	-0.349851	0.847213	0.759471	0.667634	0.454548	-5.90345	0.0368207	0.0806292	-0.2895	0.68225	-0.97175
ENSOCUG00000016716	ENSMUSG00000025612	MGI:894680	Bach1	2357	3820	3138	1373	636	658	845	43.734	62.217	46.279	23.72	11.733	14.887	16.831	P	P	5.45069	5.95925	5.5323	5.64741	4.56804	3.5525	3.896	4.07304	4.02239	0.788391	1.05462	0.831111	0.20948	-0.213817	-0.0706392	0.00315705	5.87476	0.0298418	0.0695593	0.9215	-0.01825	0.93975
ENSOCUG00000006996	ENSMUSG00000024959	MGI:1096330	Bad	348	516	361	299	359	307	164	6.457	8.404	5.324	5.166	6.623	6.946	3.267	P	P	2.6909	3.07112	2.41252	2.72485	2.36892	2.72746	2.79615	1.70779	2.40008	-0.656371	-0.457327	-0.802104	-0.707158	-0.557713	-0.52908	-0.982732	0.957788	0.406197	0.471152	-0.5565	-0.69425	0.13775
ENSOCUG00000008945	ENSMUSG00000028416	MGI:108047	Bag1	1858	2714	2298	2790	1835	1773	2194	34.475	44.204	33.891	48.2	33.852	40.114	43.701	P	P	5.10749	5.46609	5.08283	5.21881	5.59097	5.08118	5.32603	5.44958	5.36194	0.608724	0.796453	0.595813	0.635861	0.42337	0.525429	0.576929	1.56242	0.297416	0.36606	0.7025	0.54025	0.16225
ENSOCUG00000004815	ENSMUSG00000042215	MGI:1891254	Bag2	157	264	176	2230	2539	2072	2567	2.913	4.3	2.596	38.526	46.84	46.879	51.13	A	P	1.54258	2.10428	1.3761	1.67432	5.26775	5.54966	5.55086	5.6761	5.51109	-1.25752	-0.963468	-1.34468	0.501135	0.618643	0.619144	0.671347	-11.2826	0.0431176	0.089866	-1.1105	0.6025	-1.713
ENSOCUG00000011696	ENSMUSG00000030847	MGI:1352493	Bag3	1056	2147	1516	5421	6455	5554	5100	19.594	34.969	22.358	93.654	119.083	125.659	101.583	P	P	4.29235	5.12799	4.48272	4.63436	6.54926	6.89582	6.97337	6.66652	6.77124	0.181995	0.619457	0.281654	1.0353	1.17975	1.21207	1.08417	-3.27081	0.175365	0.243647	0.4005	1.12775	-0.72725
ENSOCUG00000015405	ENSMUSG00000037316	MGI:1914634	Bag4	354	455	306	189	163	103	253	6.568	7.411	4.513	3.265	3.007	2.33	5.039	P	A	2.71556	2.88961	2.17406	2.59308	1.70716	1.58834	1.22056	2.33323	1.71232	-0.643461	-0.552346	-0.926942	-0.982993	-1.03252	-1.18582	-0.722035	3.59369	0.0238543	0.0594955	-0.5975	-0.981	0.3835
ENSOCUG00000007909	ENSMUSG00000024392	MGI:1919439	Bag6	2585	3346	3319	8998	8282	5491	5886	47.965	54.497	48.949	155.45	152.787	124.233	117.239	P	P	5.58391	5.76811	5.6132	5.65507	7.28031	7.25538	6.95691	6.87331	7.09148	0.858128	0.95456	0.873464	1.34001	1.32962	1.20521	1.17037	-5.46061	0.0163945	0.0455625	0.9065	1.26125	-0.35475
ENSOCUG00000021076	ENSMUSG00000039741	MGI:2679272	Bahcc1	723	989	1343	59	48	46	13	13.415	16.108	19.807	1.019	0.886	1.041	0.259	P	A	3.74581	4.00972	4.30791	4.02115	0.027563	-0.175421	0.0576169	-1.94932	-0.509891	-0.104122	0.0340332	0.19014	-1.68309	-1.76769	-1.67056	-2.50709	8.80693	0.00146426	0.00896903	-0.035	-1.90725	1.87225
ENSOCUG00000008980	ENSMUSG00000040007	MGI:2139371	Bahd1	488	898	797	1935	1626	1108	1150	9.055	14.626	11.754	33.429	29.997	25.068	22.906	P	P	3.1787	3.87046	3.5551	3.53475	5.06304	4.90673	4.6478	4.51765	4.7838	-0.401009	-0.0388674	-0.203958	0.415808	0.350654	0.242726	0.18848	-2.76052	0.191672	0.260791	-0.22	0.2995	-0.5195
ENSOCUG00000022511	ENSMUSG00000025372	MGI:2137336	Baiap2	631	883	982	528	496	334	238	11.708	14.382	14.483	9.122	9.15	7.557	4.741	P	P	3.54945	3.84616	3.85625	3.75062	3.18931	3.19381	2.91776	2.24505	2.88649	-0.206915	-0.0515896	-0.0463082	-0.365201	-0.363325	-0.47839	-0.758788	2.98427	0.0475983	0.0958767	-0.1295	-0.49125	0.36175
ENSOCUG00000002556	ENSMUSG00000057789	MGI:1097161	Bak1	392	639	611	2976	2767	2009	1495	7.274	10.408	9.011	51.414	51.046	45.453	29.778	P	P	2.86267	3.37956	3.1717	3.13797	5.68408	5.67372	5.50632	4.89617	5.44007	-0.566451	-0.295855	-0.404673	0.674671	0.670354	0.600576	0.346252	-6.44923	0.0339452	0.0761146	-0.431	0.573	-1.004
ENSOCUG00000007403	ENSMUSG00000024232	MGI:1915260	Bambi	199	265	233	690	896	444	445	3.692	4.316	3.436	11.92	16.53	10.045	8.864	A	P	1.88458	2.10974	1.78085	1.92506	3.57537	4.04697	3.32847	3.1479	3.52468	-1.07848	-0.960613	-1.13278	-0.204283	-0.00771064	-0.307197	-0.382464	-7.9435	0.00163387	0.00958927	-1.0195	-0.22525	-0.79425
ENSOCUG00000015741	ENSMUSG00000024844	MGI:1346330	Banf1	326	422	368	7111	10439	7469	2870	6.049	6.873	5.427	122.85	192.58	168.985	57.165	P	P	2.59669	2.78099	2.44023	2.60597	6.94076	7.58931	7.40075	5.83707	6.94197	-0.705693	-0.609211	-0.787599	1.19848	1.46881	1.39022	0.738441	-10.8671	0.00084277	0.00662167	-0.6575	1.19875	-1.85625
ENSOCUG00000023597	ENSMUSG00000025316	MGI:1889023	Banp	425	941	749	656	669	452	425	7.886	15.326	11.046	11.333	12.342	10.226	8.465	P	P	2.97928	3.93794	3.46549	3.4609	3.50247	3.62548	3.35423	3.08156	3.39094	-0.505405	-0.00354174	-0.250871	-0.23467	-0.183398	-0.296458	-0.410117	0.103836	0.933198	0.945544	-0.2545	-0.281	0.0265
ENSOCUG00000007946	ENSMUSG00000021901	MGI:1206586	Bap1	933	1898	1234	3912	3456	2381	2609	17.312	30.913	18.199	67.584	63.757	53.87	51.967	P	P	4.11369	4.95015	4.18579	4.41655	6.07861	5.9945	5.75141	5.69952	5.88101	0.0884649	0.526356	0.126211	0.83912	0.804063	0.702735	0.681106	-2.02291	0.280779	0.350146	0.307	0.75675	-0.44975
ENSOCUG00000001552	ENSMUSG00000026196	MGI:1328361	Bard1	124	157	176	387	288	222	367	2.301	2.557	2.596	6.686	5.313	5.023	7.31	A	P	1.20215	1.35451	1.3761	1.31092	2.74111	2.40954	2.32847	2.86987	2.58725	-1.43574	-1.35598	-1.34468	-0.552022	-0.690226	-0.724018	-0.49835	-11.589	0.000428748	0.00480838	-1.396	-0.616	-0.78
ENSOCUG00000006551	ENSMUSG00000021381	MGI:103124	Barx1	10	52	10	249	449	333	287	0.186	0.847	0.147	4.302	8.283	7.534	5.717	A	P	-2.43011	-0.239672	-2.7614	-1.8104	2.10492	3.05019	2.91343	2.51514	2.64592	-3.33724	-2.19054	-3.51068	-0.817198	-0.423191	-0.480194	-0.646209	-3.74671	0.156958	0.223894	-2.764	-0.5915	-2.1725
ENSOCUG00000017542	ENSMUSG00000045763	MGI:1917600	Basp1	770	2774	1249	14831	8506	8354	12752	14.287	45.181	18.42	256.222	156.92	189.008	253.998	P	P	3.83667	5.49764	4.20323	4.51251	8.00125	7.29388	7.56231	7.98867	7.71153	-0.0565554	0.812968	0.135336	1.64052	1.34567	1.45756	1.63527	-2.59017	0.223935	0.293402	0.378	1.52	-1.142
ENSOCUG00000026625	ENSMUSG00000034266	MGI:1859147	Batf	88	184	109	557	363	337	390	1.633	2.997	1.608	9.623	6.697	7.625	7.768	A	P	0.707389	1.58345	0.684852	0.991897	3.26645	2.74344	2.93066	2.95757	2.97453	-1.69475	-1.23613	-1.70655	-0.333047	-0.55105	-0.473013	-0.461798	-4.32127	0.130914	0.19633	-1.4655	-0.45475	-1.01075
ENSOCUG00000006423	ENSMUSG00000003873	MGI:99702	Bax	426	663	589	2636	2160	1537	1336	7.904	10.798	8.687	45.54	39.848	34.774	26.611	P	P	2.98267	3.43275	3.11879	3.17807	5.50905	5.31643	5.11996	4.73394	5.16985	-0.50363	-0.268009	-0.432369	0.601717	0.521428	0.439533	0.278633	-6.19391	0.0351022	0.0778831	-0.386	0.4605	-0.8465
ENSOCUG00000012593	ENSMUSG00000035021	MGI:1309478	Baz1a	936	1754	1472	2646	1325	1736	2102	17.368	28.568	21.709	45.713	24.444	39.277	41.868	P	P	4.11832	4.83632	4.44023	4.46496	5.51452	4.61139	5.29561	5.38778	5.20232	0.0908895	0.466765	0.259409	0.603994	0.227552	0.512747	0.551169	-0.946823	0.476427	0.535375	0.279	0.474	-0.195
ENSOCUG00000011202	ENSMUSG00000002748	MGI:1353499	Baz1b	4968	6579	6562	2673	2084	1634	2088	92.182	107.154	96.777	46.179	38.446	36.969	41.589	P	P	6.52641	6.74354	6.59659	6.62218	5.52916	5.26476	5.20825	5.37814	5.34508	1.35153	1.4652	1.38827	0.610099	0.499888	0.476334	0.54715	13.7293	0.0123958	0.0375973	1.4085	0.53325	0.87525
ENSOCUG00000006079	ENSMUSG00000040054	MGI:2151152	Baz2a	2629	3824	3772	2925	2001	1280	1626	48.781	62.283	55.63	50.533	36.915	28.96	32.387	P	P	5.60826	5.96076	5.79778	5.78893	5.65914	5.20612	4.85598	5.01735	5.18465	0.870876	1.05541	0.970093	0.664276	0.475448	0.329503	0.396763	4.24564	0.039306	0.0841765	0.963	0.4665	0.4965
ENSOCUG00000015150	ENSMUSG00000026987	MGI:2442782	Baz2b	3567	4068	4300	1645	1589	1440	1687	66.186	66.257	63.417	28.419	29.314	32.58	33.602	P	P	6.04845	6.04999	5.98679	6.02841	4.82879	4.87352	5.02591	5.07048	4.94968	1.10132	1.10213	1.06904	0.318169	0.336812	0.400331	0.41891	30.1601	7.95608e-05	0.00222908	1.1015	0.3685	0.733
ENSOCUG00000027758	ENSMUSG00000006464	MGI:1277215	Bbs1	245	372	356	177	160	83	119	4.546	6.059	5.25	3.058	2.952	1.878	2.37	P	A	2.1846	2.59905	2.3924	2.39201	1.61253	1.56154	0.909094	1.24505	1.33205	-0.921424	-0.704457	-0.812637	-1.02244	-1.04369	-1.31564	-1.17561	2.55423	0.135515	0.201245	-0.8125	-1.1395	0.327
ENSOCUG00000010522	ENSMUSG00000035759	MGI:1919019	Bbs10	146	204	163	352	248	187	304	2.709	3.323	2.404	6.081	4.575	4.231	6.055	A	P	1.43778	1.73231	1.2654	1.4785	2.60435	2.19381	2.08095	2.59816	2.36932	-1.31238	-1.1582	-1.40263	-0.609025	-0.780147	-0.827191	-0.611605	-5.52721	0.026247	0.0636317	-1.235	-0.707	-0.528
ENSOCUG00000017254	ENSMUSG00000031755	MGI:2135267	Bbs2	330	476	337	1229	1022	939	1273	6.123	7.753	4.97	21.232	18.854	21.245	25.356	P	P	2.61428	2.95471	2.31327	2.62742	4.40819	4.2368	4.40904	4.66425	4.42957	-0.696483	-0.518268	-0.854062	0.142853	0.0714123	0.143206	0.249586	-7.87568	0.0424536	0.0889779	-0.607	0.15175	-0.75875
ENSOCUG00000024659	ENSMUSG00000025235	MGI:2143311	Bbs4	277	588	284	745	745	504	507	5.14	9.577	4.188	12.871	13.744	11.403	10.099	P	P	2.3617	3.25956	2.06641	2.56256	3.68602	3.78071	3.51133	3.33608	3.57854	-0.828709	-0.358676	-0.983292	-0.158164	-0.118693	-0.230975	-0.304026	-1.6392	0.338103	0.405865	-0.594	-0.203	-0.391
ENSOCUG00000003053	ENSMUSG00000037325	MGI:1918742	Bbs7	298	328	294	458	453	381	420	5.529	5.342	4.336	7.912	8.357	8.62	8.366	P	P	2.46713	2.41744	2.11634	2.33364	2.98412	3.06298	3.1077	3.06448	3.05482	-0.773518	-0.799529	-0.957156	-0.450728	-0.417858	-0.399218	-0.417233	-21.6123	0.000699592	0.00616947	-0.787	-0.42125	-0.36575
ENSOCUG00000000102	ENSMUSG00000035919	MGI:2442833	Bbs9	615	947	787	609	505	497	662	11.411	15.424	11.607	10.521	9.316	11.245	13.186	P	P	3.5124	3.94711	3.53689	3.66547	3.39522	3.21976	3.49116	3.72092	3.45676	-0.226313	0.00125864	-0.213494	-0.279375	-0.352512	-0.239386	-0.143614	1.16193	0.414876	0.478967	-0.1125	-0.25375	0.14125
ENSOCUG00000001686	ENSMUSG00000022641	MGI:1917758	Bbx	2622	3437	2782	1780	1582	1065	1341	48.651	55.979	41.029	30.751	29.185	24.096	26.71	P	P	5.60441	5.80682	5.35857	5.58994	4.94258	4.86715	4.59069	4.73933	4.78494	0.868862	0.974826	0.740166	0.365599	0.334158	0.218924	0.280879	10.0307	0.0139408	0.0408071	0.922	0.3	0.622
ENSOCUG00000026249	ENSMUSG00000067722	MGI:2670966	BC003965	371	442	354	204	326	240	90	6.884	7.199	5.221	3.524	6.014	5.43	1.793	P	A	2.78323	2.84779	2.38427	2.67177	1.81735	2.58834	2.44095	0.84209	1.92218	-0.608035	-0.574239	-0.816892	-0.937066	-0.615698	-0.677137	-1.34357	1.81812	0.164749	0.232314	-0.591	-0.8935	0.3025
ENSOCUG00000007049	ENSMUSG00000052712	MGI:2136782	BC004004	900	1232	1046	2717	2178	1679	1747	16.7	20.066	15.426	46.939	40.18	37.987	34.797	P	P	4.06174	4.32668	3.94733	4.11192	5.55272	5.3284	5.24744	5.1209	5.31237	0.0612678	0.199963	0.00137666	0.619917	0.526418	0.492671	0.439926	-4.91948	0.0574933	0.109547	0.1305	0.51975	-0.38925
ENSOCUG00000016845	ENSMUSG00000019132	MGI:2441726	BC005537	5472	8287	7852	2588	1946	2154	3059	101.533	134.973	115.802	44.711	35.9	48.734	60.93	P	P	6.66581	7.07652	6.85551	6.86595	5.48254	5.16591	5.60686	5.92908	5.5461	1.42451	1.63952	1.52382	0.590666	0.458688	0.642483	0.776793	7.26336	0.0242154	0.0601264	1.5325	0.61725	0.91525
ENSOCUG00000022608	ENSMUSG00000026851	MGI:2385132	BC005624	742	1033	727	1950	1972	1446	1543	13.768	16.825	10.722	33.688	36.38	32.716	30.734	P	P	3.78323	4.07251	3.42248	3.75941	5.07418	5.18506	5.03191	4.94176	5.05823	-0.0845311	0.0669081	-0.273387	0.420451	0.466669	0.402832	0.365256	-5.3589	0.0931562	0.154419	-0.009	0.41375	-0.42275
ENSOCUG00000009793	ENSMUSG00000030780	MGI:2384572	BC017158	588	620	662	485	339	347	302	10.91	10.098	9.763	8.379	6.254	7.851	6.015	P	P	3.44763	3.33601	3.28735	3.357	3.06676	2.64476	2.97285	2.58864	2.81825	-0.260221	-0.318653	-0.344125	-0.416283	-0.592183	-0.455429	-0.615574	3.99385	0.0162366	0.0452143	-0.2895	-0.51975	0.23025
ENSOCUG00000027251	ENSMUSG00000038543	MGI:2385885	BC028528	145	174	183	578	299	405	427	2.69	2.834	2.699	9.986	5.516	9.163	8.505	A	P	1.42787	1.50283	1.43237	1.45436	3.31985	2.46362	3.19583	3.08833	3.01691	-1.31757	-1.27833	-1.31522	-0.310792	-0.667686	-0.362483	-0.407293	-10.5082	0.00111168	0.00777361	-1.298	-0.437	-0.861
ENSOCUG00000027094	ENSMUSG00000036299	MGI:3039614	BC031181	937	1543	1021	2755	2424	1978	2458	17.386	25.131	15.058	47.596	44.718	44.752	48.959	P	P	4.11986	4.65141	3.91243	4.2279	5.57276	5.48279	5.48388	5.61351	5.53823	0.091696	0.369963	-0.0168936	0.628269	0.590769	0.591224	0.645254	-2.74054	0.218939	0.288176	0.231	0.61375	-0.38275
ENSOCUG00000015026	ENSMUSG00000033722	MGI:2672904	BC034090	327	520	535	182	296	190	126	6.068	8.469	7.89	3.144	5.461	4.299	2.51	P	A	2.6011	3.08226	2.98006	2.88781	1.65271	2.44907	2.10391	1.32752	1.8833	-0.70338	-0.451495	-0.504994	-1.00569	-0.67375	-0.81762	-1.14124	2.04649	0.154901	0.221643	-0.577	-0.90975	0.33275
ENSOCUG00000002762	ENSMUSG00000036948	MGI:2385896	BC037034	559	1296	799	1011	927	636	674	10.372	21.108	11.784	17.466	17.101	14.389	13.425	P	P	3.37466	4.39974	3.55872	3.77771	4.12649	4.09604	3.84694	3.74684	3.95408	-0.29842	0.238212	-0.202065	0.0254333	0.012743	-0.0910888	-0.132811	0.0609302	0.96095	0.967916	-0.03	-0.0465	0.0165
ENSOCUG00000013638	ENSMUSG00000053684	MGI:2670984	BC048403	116	130	174	439	341	220	497	2.152	2.117	2.566	7.584	6.291	4.977	9.899	A	P	1.10594	1.08226	1.35961	1.1826	2.923	2.65324	2.31541	3.30734	2.79975	-1.48611	-1.4985	-1.35331	-0.476207	-0.588646	-0.72946	-0.316005	-11.0046	0.00152903	0.00919214	-1.4925	-0.5275	-0.965
ENSOCUG00000027987	ENSMUSG00000021763	MGI:3040697	BC067074	198	205	216	404	216	211	285	3.674	3.339	3.186	6.98	3.985	4.774	5.677	A	P	1.87731	1.73937	1.67155	1.76275	2.80313	1.9945	2.25515	2.50505	2.38946	-1.08229	-1.1545	-1.19	-0.52617	-0.863223	-0.754578	-0.650415	-5.19788	0.00672836	0.0243386	-1.1185	-0.6985	-0.42
ENSOCUG00000026791	ENSMUSG00000002980	MGI:1929940	Bcam	3650	6523	4327	1982	3340	2135	1015	67.726	106.242	63.815	34.241	61.617	48.304	20.217	P	P	6.08164	6.73121	5.99582	6.26956	5.09766	5.94525	5.59408	4.3375	5.24362	1.11869	1.45875	1.07377	0.430239	0.783532	0.637155	0.113388	3.56707	0.0488628	0.0976037	1.289	0.491	0.798
ENSOCUG00000028156	ENSMUSG00000020650	MGI:101917	Bcap29	375	776	491	340	193	235	365	6.958	12.639	7.241	5.874	3.56	5.317	7.27	P	P	2.7987	3.6598	2.85625	3.10492	2.55431	1.83207	2.41057	2.86199	2.41474	-0.599936	-0.149148	-0.569812	-0.629883	-0.930927	-0.689797	-0.501637	1.2924	0.376167	0.442744	-0.3745	-0.68825	0.31375
ENSOCUG00000017921	ENSMUSG00000002015	MGI:1350933	Bcap31	1837	2441	1890	16190	10000	7998	10031	34.086	39.757	27.874	279.7	184.481	180.954	199.8	P	P	5.09109	5.31315	4.80084	5.06836	8.12774	7.52733	7.49948	7.64241	7.69924	0.600139	0.716384	0.448189	1.69324	1.44298	1.43137	1.49095	-10.1847	0.00163979	0.00960247	0.658	1.5145	-0.8565
ENSOCUG00000015992	ENSMUSG00000031955	MGI:108091	Bcar1	907	975	1081	1721	1971	1532	1260	16.829	15.88	15.943	29.732	36.361	34.661	25.097	P	P	4.07292	3.98915	3.99482	4.01896	4.89395	5.18433	5.11526	4.64944	4.96074	0.0671193	0.0232656	0.0262345	0.345329	0.466364	0.437573	0.243413	-5.95822	0.00455501	0.0187071	0.045	0.373	-0.328
ENSOCUG00000015440	ENSMUSG00000028121	MGI:1352501	Bcar3	1126	1080	1275	4011	2975	2143	1924	20.893	17.59	18.804	69.294	54.883	48.485	38.323	P	P	4.38495	4.1367	4.23295	4.25153	6.11467	5.77829	5.59947	5.26013	5.68814	0.230469	0.100512	0.150897	0.854149	0.71394	0.639405	0.49796	-5.19249	0.0100166	0.0321354	0.1655	0.67625	-0.51075
ENSOCUG00000016784	ENSMUSG00000005687	MGI:1915433	Bcas2	703	1079	859	2316	1803	1639	2060	13.044	17.574	12.669	40.011	33.262	37.082	41.032	P	P	3.70534	4.13537	3.66318	3.83463	5.32234	5.0558	5.21266	5.35867	5.23736	-0.125309	0.0998127	-0.147378	0.52389	0.412791	0.478171	0.539031	-4.31864	0.122969	0.187123	-0.0125	0.4885	-0.501
ENSOCUG00000010794	ENSMUSG00000059439	MGI:2385848	Bcas3	963	1423	1311	888	662	463	871	17.869	23.177	19.335	15.341	12.213	10.475	17.349	P	P	4.15935	4.53461	4.27312	4.32236	3.93934	3.6103	3.38892	4.11677	3.76383	0.112367	0.308817	0.171926	-0.0525754	-0.189723	-0.281999	0.0213811	2.81234	0.10515	0.167516	0.2105	-0.126	0.3365
ENSOCUG00000003963	ENSMUSG00000030268	MGI:104861	Bcat1	294	1547	352	4	0	0	0	5.455	25.196	5.191	0.069	0	0	0	P	A	2.44763	4.65515	2.3761	3.15963	-3.85508	-5.76038	-5.46595	-5.64976	-5.18279	-0.783725	0.371919	-0.821171	-3.30145	-4.09563	-3.9729	-4.04952	6.00843	0.0752312	0.13237	-0.206	-3.855	3.649
ENSOCUG00000008761	ENSMUSG00000030983	MGI:1913415	Bccip	707	889	833	1616	1301	1051	1434	13.118	14.479	12.285	27.918	24.001	23.779	28.563	P	P	3.71352	3.85593	3.61884	3.72943	4.80313	4.58502	4.5716	4.83607	4.69896	-0.121024	-0.046475	-0.170592	0.307473	0.21656	0.210967	0.321201	-7.32716	0.0124233	0.0376431	-0.0835	0.264	-0.3475
ENSOCUG00000008068	ENSMUSG00000027792	MGI:894278	Bche	365	380	308	7706	8464	9483	12812	6.773	6.189	4.542	133.129	156.145	214.552	255.193	P	P	2.75971	2.62974	2.18345	2.5243	7.05669	7.28674	7.74518	7.99544	7.52101	-0.620349	-0.688387	-0.922022	1.2468	1.34269	1.53378	1.6381	-22.02	4.59446e-05	0.00178761	-0.654	1.4405	-2.0945
ENSOCUG00000023789	ENSMUSG00000060376	MGI:107701	Bckdha	278	265	289	1345	1472	1134	1001	5.158	4.316	4.262	23.236	27.156	25.657	19.938	A	P	2.3669	2.10974	2.09159	2.18941	4.53831	4.76318	4.68126	4.31746	4.57505	-0.825988	-0.960613	-0.970111	0.19709	0.29082	0.256674	0.105036	-14.0261	0.00783481	0.0269386	-0.8935	0.2125	-1.106
ENSOCUG00000013139	ENSMUSG00000032263	MGI:88137	Bckdhb	443	416	501	856	622	623	812	8.22	6.776	7.389	14.788	11.475	14.095	16.174	P	P	3.03912	2.76033	2.88533	2.89493	3.88639	3.52039	3.81714	4.01557	3.80987	-0.474077	-0.620026	-0.554585	-0.0746456	-0.227202	-0.103508	-0.0207984	-5.17712	0.0455317	0.0931413	-0.547	-0.10675	-0.44025
ENSOCUG00000002290	ENSMUSG00000030802	MGI:1276121	Bckdk	969	986	1051	2296	2238	1608	1941	17.98	16.059	15.5	39.666	41.287	36.381	38.661	P	P	4.16831	4.00533	3.95421	4.04262	5.30983	5.36761	5.18511	5.27282	5.28384	0.117058	0.0317387	0.00497827	0.518675	0.54276	0.466689	0.50325	-9.54979	0.037168	0.0811186	0.0745	0.508	-0.4335
ENSOCUG00000016199	ENSMUSG00000028191	MGI:1337994	Bcl10	630	986	821	724	608	405	899	11.69	16.059	12.108	12.508	11.216	9.163	17.907	P	P	3.54717	4.00533	3.59791	3.7168	3.64477	3.48754	3.19583	4.16241	3.62264	-0.208113	0.0317387	-0.181551	-0.175358	-0.240892	-0.362483	0.0404083	0.658139	0.576295	0.629642	-0.088	-0.1845	0.0965
ENSOCUG00000025312	ENSMUSG00000057329	MGI:88138	Bcl2	1633	2903	1725	333	290	139	261	30.3	47.282	25.44	5.753	5.35	3.145	5.199	P	A	4.92127	5.56322	4.66905	5.05118	2.5243	2.41953	1.653	2.37814	2.24374	0.511234	0.847298	0.379197	-0.642393	-0.686065	-1.00557	-0.703314	7.67089	0.0338836	0.0760289	0.679	-0.75925	1.43825
ENSOCUG00000011609	ENSMUSG00000099974	MGI:1278325	Bcl2a1d	116	207	110	7345	3488	2973	4314	2.152	3.371	1.622	126.893	64.347	67.264	85.927	A	P	1.10594	1.75338	0.698027	1.18578	6.98747	6.0078	6.07176	6.42505	6.37302	-1.48611	-1.14717	-1.69965	1.21795	0.809605	0.836264	0.983522	-11.7692	0.0137831	0.040553	-1.3165	0.962	-2.2785
ENSOCUG00000003201	ENSMUSG00000007659	MGI:88139	Bcl2l1	1322	1984	1933	1380	928	621	777	24.53	32.314	28.508	23.841	17.12	14.05	15.476	P	P	4.61646	5.01408	4.83329	4.82128	4.57537	4.0976	3.8125	3.95201	4.10937	0.351669	0.559825	0.46518	0.212538	0.0133914	-0.105441	-0.0472937	3.50285	0.0752549	0.13237	0.456	0.0185	0.4375
ENSOCUG00000007385	ENSMUSG00000027381	MGI:1197519	Bcl2l11	636	1046	949	77	47	26	35	11.801	17.036	13.996	1.33	0.867	0.588	0.697	P	A	3.56084	4.09056	3.80693	3.81944	0.411706	-0.205795	-0.765505	-0.52048	-0.270019	-0.200954	0.0763535	-0.0721248	-1.52297	-1.78035	-2.01365	-1.91152	9.99798	0.00645454	0.0236383	-0.0625	-1.80725	1.74475
ENSOCUG00000010676	ENSMUSG00000003190	MGI:1922986	Bcl2l12	107	100	106	482	621	461	256	1.985	1.629	1.563	8.327	11.456	10.43	5.099	A	P	0.989425	0.703745	0.644588	0.779252	3.05781	3.51807	3.38268	2.35024	3.0772	-1.5471	-1.69666	-1.72762	-0.420015	-0.22817	-0.284602	-0.714946	-9.16075	0.000896327	0.00680607	-1.622	-0.412	-1.21
ENSOCUG00000016237	ENSMUSG00000009112	MGI:2136959	Bcl2l13	807	1305	1151	639	301	266	278	14.974	21.255	16.975	11.039	5.553	6.018	5.537	P	P	3.90438	4.40972	4.08534	4.13315	3.46459	2.47324	2.58934	2.46918	2.74909	-0.0211089	0.243439	0.0736228	-0.250459	-0.663677	-0.615284	-0.665369	3.9798	0.0478675	0.0962794	0.111	-0.5485	0.6595
ENSOCUG00000011026	ENSMUSG00000089682	MGI:108052	Bcl2l2	1257	2090	1413	368	372	234	188	23.324	34.04	20.839	6.358	6.863	5.294	3.745	P	P	4.54373	5.08918	4.38121	4.67137	2.66848	2.77878	2.40442	1.90483	2.43913	0.31359	0.599135	0.228514	-0.582295	-0.536322	-0.692361	-0.900603	6.91372	0.030655	0.0708605	0.4565	-0.67775	1.13425
ENSOCUG00000026628	ENSMUSG00000053175	MGI:88140	Bcl3	310	535	389	1236	969	1169	622	5.752	8.714	5.737	21.353	17.876	26.449	12.389	P	P	2.52408	3.12328	2.52029	2.72255	4.41638	4.15997	4.72511	3.63101	4.23312	-0.743702	-0.430017	-0.745685	0.146268	0.0393893	0.274954	-0.181093	-3.56369	0.0813114	0.139861	-0.587	0.06975	-0.65675
ENSOCUG00000005429	ENSMUSG00000022508	MGI:107187	Bcl6	978	1640	1419	4305	3616	3195	3674	18.147	26.711	20.927	74.374	66.708	72.287	73.18	P	P	4.18165	4.73937	4.38733	4.43611	6.21672	6.0598	6.17566	6.19337	6.16139	0.124041	0.41601	0.231714	0.896686	0.831278	0.87957	0.886955	-4.11455	0.147967	0.214337	0.27	0.87375	-0.60375
ENSOCUG00000002274	ENSMUSG00000000317	MGI:1278332	Bcl6b	251	299	439	221	140	178	96	4.657	4.87	6.474	3.818	2.583	4.027	1.912	P	A	2.2195	2.28389	2.69474	2.39938	1.93282	1.3689	2.00979	0.935199	1.56168	-0.903151	-0.869443	-0.654359	-0.888933	-1.12399	-0.856852	-1.30476	1.47648	0.23208	0.301635	-0.886	-1.04375	0.15775
ENSOCUG00000000630	ENSMUSG00000029438	MGI:1924295	Bcl7a	365	539	439	449	660	436	320	6.773	8.779	6.474	7.757	12.176	9.864	6.374	P	P	2.75971	3.13403	2.69474	2.86283	2.95549	3.60594	3.30224	2.67216	3.13396	-0.620349	-0.424392	-0.654359	-0.462663	-0.191543	-0.318131	-0.580759	-1.03039	0.389738	0.455428	-0.522	-0.3885	-0.1335
ENSOCUG00000001782	ENSMUSG00000029681	MGI:1332238	Bcl7b	482	622	695	2861	3119	2153	2449	8.944	10.131	10.25	49.427	57.54	48.711	48.78	P	P	3.16085	3.34066	3.35754	3.28635	5.62722	5.84648	5.60619	5.60821	5.67203	-0.410353	-0.31622	-0.307385	0.650972	0.742365	0.642204	0.643049	-19.5226	0.00739425	0.0259279	-0.363	0.6695	-1.0325
ENSOCUG00000012143	ENSMUSG00000038256	MGI:1924828	Bcl9	573	791	838	1060	1326	881	905	10.632	12.883	12.359	18.313	24.462	19.933	18.026	P	P	3.41035	3.68742	3.62747	3.57508	4.19477	4.61248	4.31705	4.17201	4.32408	-0.279737	-0.134688	-0.166072	0.0538944	0.228006	0.104865	0.0444084	-3.75689	0.0799913	0.138153	-0.2075	0.10775	-0.31525
ENSOCUG00000027585	ENSMUSG00000063382	MGI:1933114	Bcl9l	2023	2148	2812	2130	2182	1183	1450	37.537	34.985	41.471	36.798	40.254	26.765	28.881	P	P	5.23024	5.12867	5.37405	5.24432	5.20156	5.33105	4.74229	4.85207	5.03174	0.672982	0.619809	0.748267	0.473546	0.527522	0.282113	0.327873	3.7967	0.0203477	0.0530907	0.6465	0.403	0.2435
ENSOCUG00000016363	ENSMUSG00000037608	MGI:1917580	Bclaf1	4805	5951	5637	4287	2782	2286	3820	89.157	96.926	83.135	74.063	51.323	51.721	76.088	P	P	6.47828	6.5988	6.37738	6.48482	6.21067	5.68152	5.69266	6.24959	5.95861	1.32634	1.38943	1.27351	0.894166	0.673606	0.67825	0.910389	7.83865	0.00155207	0.0092962	1.3575	0.789	0.5685
ENSOCUG00000015294	ENSMUSG00000044150	MGI:2685992	Bclaf3	437	558	505	578	552	437	630	8.109	9.088	7.448	9.986	10.183	9.887	12.549	P	P	3.01945	3.18401	2.89681	3.03342	3.31985	3.34814	3.30554	3.64944	3.40574	-0.484376	-0.398227	-0.548579	-0.310792	-0.298998	-0.316753	-0.173408	-3.02118	0.0772199	0.134981	-0.441	-0.275	-0.166
ENSOCUG00000009662	ENSMUSG00000032066	MGI:2177469	Bco2	32	50	54	290	361	317	272	0.594	0.814	0.796	5.01	6.66	7.172	5.418	A	P	-0.752042	-0.296255	-0.328445	-0.458914	2.32483	2.73547	2.84239	2.4377	2.5851	-2.45877	-2.22016	-2.23701	-0.725536	-0.554372	-0.509804	-0.67849	-13.2636	0.0201359	0.0527905	-2.3395	-0.617	-1.7225
ENSOCUG00000017052	ENSMUSG00000040363	MGI:1918708	Bcor	1201	1204	1406	1190	861	577	1032	22.285	19.61	20.736	20.559	15.884	13.055	20.556	P	P	4.47798	4.29351	4.37405	4.38184	4.36167	3.98949	3.70648	4.36146	4.10477	0.279171	0.1826	0.224763	0.123461	-0.0316718	-0.149634	0.123377	2.62655	0.0611962	0.114504	0.231	0.016	0.215
ENSOCUG00000002913	ENSMUSG00000036959	MGI:2443910	Bcorl1	726	886	931	886	822	612	621	13.471	14.431	13.73	15.307	15.164	13.846	12.369	P	P	3.75178	3.85105	3.7793	3.79405	3.93608	3.92261	3.79144	3.62869	3.81971	-0.100995	-0.049028	-0.0865876	-0.0539313	-0.0595467	-0.11422	-0.182061	0.696203	0.53102	0.58758	-0.075	-0.1025	0.0275
ENSOCUG00000004923	ENSMUSG00000009681	MGI:88141	Bcr	2863	3732	3787	980	1080	700	787	53.123	60.784	55.851	16.931	19.924	15.837	15.676	P	P	5.73127	5.92562	5.80351	5.82013	4.08156	4.31643	3.98527	3.97046	4.08843	0.935274	1.03702	0.97309	0.00670581	0.104606	-0.0334307	-0.0396037	16.0144	0.00456561	0.0187071	0.986	0.00975	0.97625
ENSOCUG00000002003	ENSMUSG00000026172	MGI:1914071	Bcs1l	202	265	262	1066	903	715	696	3.748	4.316	3.864	18.416	16.659	16.177	13.863	A	P	1.90617	2.10974	1.95009	1.98867	4.20291	4.0582	4.01585	3.79318	4.01754	-1.06718	-0.960613	-1.04419	0.0572887	-0.00303088	-0.0206808	-0.113496	-15.6231	0.00452276	0.0186253	-1.014	-0.02	-0.994
ENSOCUG00000010327	ENSMUSG00000046598	MGI:1919161	Bdh1	116	210	119	1084	771	548	479	2.152	3.42	1.755	18.727	14.223	12.398	9.541	A	P	1.10594	1.77413	0.811485	1.23052	4.22707	3.8302	3.63209	3.25412	3.73587	-1.48611	-1.1363	-1.64025	0.067358	-0.0980641	-0.180643	-0.338189	-6.04001	0.0502412	0.0992388	-1.311	-0.1375	-1.1735
ENSOCUG00000000694	ENSMUSG00000028167	MGI:1917022	Bdh2	156	124	153	1981	1560	1381	1687	2.895	2.02	2.256	34.224	28.779	31.245	33.602	A	P	1.53336	1.01408	1.17406	1.2405	5.09693	4.84695	4.96555	5.07048	4.99498	-1.26235	-1.53419	-1.45045	0.429936	0.325736	0.375174	0.41891	-12.9339	0.0425307	0.0890436	-1.398	0.3875	-1.7855
ENSOCUG00000006731	ENSMUSG00000048482	MGI:88145	Bdnf	491	646	620	581	972	524	878	9.111	10.522	9.144	10.037	17.932	11.855	17.488	P	P	3.18754	3.39528	3.19279	3.25854	3.32731	4.16443	3.56748	4.12831	3.79688	-0.39638	-0.287627	-0.393629	-0.307679	0.0412482	-0.207574	0.0261946	-2.25039	0.0879238	0.148196	-0.342	-0.11225	-0.22975
ENSOCUG00000011167	ENSMUSG00000049658	MGI:1347077	Bdp1	2375	3450	2990	1608	1125	1182	1253	44.068	56.191	44.097	27.78	20.754	26.743	24.958	P	P	5.46167	5.81227	5.4626	5.57885	4.79597	4.37533	4.74107	4.64141	4.63844	0.794137	0.977677	0.794623	0.304489	0.129154	0.281604	0.240063	6.47945	0.0538225	0.104248	0.886	0.23875	0.64725
ENSOCUG00000015964	ENSMUSG00000035086	MGI:1891828	Becn1	1290	2091	1833	3148	2073	1856	2193	23.936	34.057	27.033	54.385	38.243	41.992	43.681	P	P	4.58111	5.08987	4.75666	4.80921	5.76514	5.25712	5.39204	5.44893	5.46581	0.333162	0.599496	0.425061	0.708459	0.496706	0.552941	0.576654	-0.839249	0.532863	0.58913	0.466	0.58375	-0.11775
ENSOCUG00000029507	ENSMUSG00000092060	MGI:3648414	Bend4	472	717	610	2	0	0	0	8.758	11.678	8.996	0.035	0	0	0	P	A	3.1306	3.54572	3.16933	3.28188	-4.85508	-5.76038	-5.46595	-5.64976	-5.43279	-0.426187	-0.208871	-0.40591	-3.71828	-4.09563	-3.9729	-4.04952	26.5019	0.000665359	0.00600366	-0.3175	-3.95925	3.64175
ENSOCUG00000004551	ENSMUSG00000048186	MGI:2443100	Bend7	71	125	69	323	380	244	384	1.317	2.036	1.018	5.58	7.01	5.52	7.649	A	P	0.397705	1.02567	0.0251919	0.482857	2.48031	2.80947	2.46479	2.9352	2.67244	-1.85687	-1.52812	-2.05188	-0.660728	-0.523527	-0.667197	-0.471121	-6.47407	0.0721755	0.128557	-1.6925	-0.58075	-1.11175
ENSOCUG00000017029	ENSMUSG00000032757	MGI:1343104	Bet1	584	737	618	1517	1218	1500	1065	10.836	12.004	9.114	26.208	22.47	33.937	21.213	P	P	3.43778	3.58541	3.18813	3.40377	4.71193	4.48991	5.0848	4.40687	4.67338	-0.265376	-0.188093	-0.39607	0.269456	0.176918	0.424879	0.142305	-6.48253	0.002942	0.0138714	-0.2265	0.25325	-0.47975
ENSOCUG00000014490	ENSMUSG00000025484	MGI:1913128	Bet1l	462	622	645	238	233	136	125	8.572	10.131	9.512	4.112	4.298	3.077	2.49	P	A	3.09971	3.34066	3.24982	3.23006	2.03974	2.1038	1.62152	1.31602	1.77027	-0.44236	-0.31622	-0.363774	-0.844369	-0.817665	-1.01869	-1.14603	5.79484	0.00619123	0.0230314	-0.379	-0.95675	0.57775
ENSOCUG00000013489	ENSMUSG00000042750	MGI:1338017	Bex2	93	1443	81	10	16	1	2	1.726	23.503	1.195	0.173	0.295	0.023	0.04	P	A	0.787117	4.55474	0.256517	1.86613	-2.53315	-1.76038	-5.46595	-4.64976	-3.60231	-1.65301	0.319358	-1.93078	-2.75045	-2.42834	-3.9729	-3.6327	2.40677	0.204216	0.273467	-0.667	-3.196	2.529
ENSOCUG00000028131	ENSMUSG00000046432	MGI:1338016	Bex3	296	906	320	404	435	382	280	5.492	14.756	4.719	6.98	8.025	8.643	5.577	P	P	2.45741	3.88326	2.2386	2.85975	2.80313	3.00449	3.11148	2.47952	2.84966	-0.778604	-0.0321689	-0.893155	-0.52617	-0.44224	-0.397642	-0.661058	0.267888	0.83178	0.85971	-0.4055	-0.50675	0.10125
ENSOCUG00000005925	ENSMUSG00000022684	MGI:1914368	Bfar	1146	1499	1288	1100	881	675	852	21.264	24.415	18.995	19.004	16.253	15.272	16.97	P	P	4.41035	4.60967	4.24758	4.42254	4.24821	4.02261	3.9328	4.08495	4.07214	0.243767	0.348114	0.158559	0.076169	-0.017863	-0.0553002	0.00811809	4.9802	0.0584063	0.110803	0.296	0.00275	0.29325
ENSOCUG00000023931	ENSMUSG00000031375	MGI:88158	Bgn	58985	64932	68243	145496	159954	155129	131426	1094.47	1057.57	1006.45	2513.6	2950.85	3509.78	2617.78	P	P	10.096	10.0465	9.97506	10.0392	11.2955	11.5269	11.7772	11.3541	11.4884	3.22024	3.19433	3.15692	3.01365	3.11009	3.2144	3.03807	2.41742	0.0831581	0.142008	3.207	3.094	0.113
ENSOCUG00000013059	ENSMUSG00000072964	MGI:1917487	Bhlhb9	451	732	452	253	153	108	196	8.368	11.922	6.666	4.371	2.823	2.443	3.904	P	A	3.06494	3.57559	2.73685	3.12579	2.12791	1.497	1.28894	1.96495	1.7197	-0.46056	-0.193234	-0.632319	-0.807615	-1.07059	-1.15732	-0.875543	4.14876	0.0639776	0.11822	-0.327	-0.978	0.651
ENSOCUG00000015177	ENSMUSG00000030103	MGI:1097714	Bhlhe40	2179	2759	2666	2671	2450	1784	1989	40.432	44.937	39.318	46.144	45.198	40.363	39.617	P	P	5.33741	5.48982	5.29713	5.37478	5.52808	5.49818	5.33495	5.30806	5.41732	0.729086	0.808873	0.707999	0.609649	0.597185	0.529149	0.51794	4.43666	0.0610514	0.114377	0.769	0.5635	0.2055
ENSOCUG00000013696	ENSMUSG00000014329	MGI:1933388	Bicc1	2473	2299	3036	2400	2187	2785	3158	45.887	37.444	44.775	41.463	40.346	63.01	62.902	P	P	5.52	5.22668	5.48462	5.41044	5.37374	5.33435	5.97752	5.97503	5.66516	0.824676	0.671119	0.806154	0.545314	0.528898	0.796982	0.795946	0.755973	0.505975	0.564082	0.748	0.66675	0.08125
ENSOCUG00000017857	ENSMUSG00000003452	MGI:1101760	Bicd1	1712	2797	1620	871	465	350	553	31.766	45.555	23.892	15.047	8.578	7.919	11.015	P	P	4.98942	5.50955	4.57845	5.02581	3.91145	3.1007	2.98527	3.46137	3.3647	0.546915	0.819204	0.331766	-0.0641993	-0.402135	-0.450252	-0.251801	6.04089	0.0304584	0.0704899	0.683	-0.292	0.975
ENSOCUG00000010743	ENSMUSG00000037933	MGI:1924145	Bicd2	2311	3389	2956	1788	1782	1069	1148	42.881	55.198	43.595	30.89	32.875	24.186	22.866	P	P	5.42226	5.78653	5.4461	5.55163	4.94905	5.0389	4.5961	4.51514	4.7748	0.773506	0.964204	0.785985	0.368295	0.405746	0.221178	0.187434	5.25195	0.0486509	0.0972719	0.869	0.2955	0.5735
ENSOCUG00000023719	ENSMUSG00000070808	MGI:2154263	Bicra	402	608	693	196	241	151	96	7.459	9.903	10.22	3.386	4.446	3.416	1.912	P	A	2.89901	3.30782	3.35338	3.18673	1.75963	2.15251	1.77246	0.935199	1.65495	-0.547426	-0.333414	-0.309561	-0.961124	-0.797364	-0.955776	-1.30476	3.73069	0.0335146	0.0754795	-0.44	-1.00475	0.56475
ENSOCUG00000013438	ENSMUSG00000036568	MGI:2673855	Bicral	922	1186	1045	1410	1262	862	1374	17.108	19.317	15.412	24.359	23.282	19.503	27.368	P	P	4.09658	4.27178	3.94595	4.10477	4.6064	4.54111	4.2856	4.7744	4.55188	0.0795076	0.171223	0.000654269	0.225471	0.198258	0.0917545	0.295498	-1.24183	0.309062	0.377574	0.1255	0.2025	-0.077
ENSOCUG00000016266	ENSMUSG00000004446	MGI:108093	Bid	340	594	482	794	424	321	389	6.309	9.675	7.109	13.717	7.822	7.263	7.748	P	P	2.65735	3.27421	2.82956	2.92037	3.77792	2.96754	2.86048	2.95386	3.13995	-0.673936	-0.351008	-0.583784	-0.119859	-0.457642	-0.502264	-0.463342	-0.687136	0.575666	0.629228	-0.5125	-0.38575	-0.12675
ENSOCUG00000014862	ENSMUSG00000024381	MGI:108092	Bin1	924	1436	1110	934	1305	711	681	17.145	23.389	16.37	16.136	24.075	16.086	13.564	P	P	4.09971	4.54773	4.03301	4.22682	4.0122	4.58945	4.00776	3.76175	4.09279	0.0811441	0.315685	0.0462288	-0.0222046	0.218406	-0.0240544	-0.126598	1.35288	0.318829	0.387076	0.1985	0.01125	0.18725
ENSOCUG00000008291	ENSMUSG00000098112	MGI:3611448	Bin2	369	517	576	4879	2282	2322	2609	6.847	8.421	8.495	84.29	42.099	52.535	51.967	P	P	2.77543	3.07391	3.08659	2.97865	6.39729	5.3957	5.71521	5.69952	5.80193	-0.612118	-0.455865	-0.449225	0.971952	0.554468	0.687646	0.681106	-10.6759	0.001038	0.00747343	-0.534	0.72375	-1.25775
ENSOCUG00000013245	ENSMUSG00000022089	MGI:1929883	Bin3	397	624	457	286	253	189	213	7.366	10.163	6.74	4.941	4.667	4.276	4.243	P	A	2.88095	3.34529	2.75272	2.99299	2.30479	2.22261	2.0963	2.08495	2.17716	-0.556878	-0.313796	-0.62401	-0.733889	-0.768144	-0.820793	-0.825525	2.84844	0.202184	0.271607	-0.4355	-0.78725	0.35175
ENSOCUG00000013890	ENSMUSG00000057367	MGI:1197009	Birc2	1612	2324	1910	2522	1697	2096	2308	29.911	37.852	28.169	43.57	31.306	47.422	45.971	P	P	4.90259	5.24228	4.81602	4.98697	5.44527	4.96839	5.56748	5.52266	5.37595	0.501459	0.679287	0.456139	0.575131	0.376355	0.626069	0.60739	0.414968	0.720243	0.760425	0.59	0.546	0.044
ENSOCUG00000010109	ENSMUSG00000032000	MGI:1197007	Birc3	1169	1665	1481	1029	664	1039	1059	21.691	27.118	21.842	17.777	12.25	23.507	21.093	P	P	4.43902	4.76119	4.44902	4.54975	4.15195	3.61466	4.55503	4.39872	4.18009	0.258774	0.427436	0.264013	0.0360456	-0.187909	0.204061	0.138907	2.45808	0.0892025	0.149676	0.343	0.04775	0.29525
ENSOCUG00000006600	ENSMUSG00000024073	MGI:1276108	Birc6	12017	16050	13901	4475	3072	2603	3746	222.976	261.411	205.013	77.31	56.673	58.893	74.614	P	P	7.80075	8.03017	7.67957	7.83683	6.27259	5.82458	5.88001	6.22137	6.04964	2.01865	2.13876	1.95522	0.919976	0.733234	0.756341	0.898626	16.287	0.00173364	0.00990199	2.079	0.827	1.252
ENSOCUG00000022995	ENSMUSG00000067787	MGI:1858907	Blcap	506	838	617	615	516	287	581	9.389	13.649	9.1	10.625	9.519	6.493	11.573	P	P	3.23095	3.77069	3.18579	3.39581	3.40936	3.25084	2.69896	3.53263	3.22295	-0.373653	-0.0910949	-0.397293	-0.27348	-0.339554	-0.56959	-0.222099	0.737552	0.552271	0.607548	-0.2325	-0.35125	0.11875
ENSOCUG00000013969	ENSMUSG00000030528	MGI:1328362	Blm	130	193	174	1011	423	344	563	2.412	3.143	2.566	17.466	7.804	7.783	11.214	A	P	1.27033	1.65235	1.35961	1.42743	4.12649	2.96413	2.96032	3.48723	3.38454	-1.40005	-1.20006	-1.35331	0.0254333	-0.459062	-0.46065	-0.241024	-6.6598	0.00455663	0.0187071	-1.3	-0.284	-1.016
ENSOCUG00000003644	ENSMUSG00000020840	MGI:1345186	Blmh	1261	1421	1245	3615	2691	2370	3004	23.398	23.144	18.361	62.453	49.644	53.621	59.834	P	P	4.54831	4.53258	4.1986	4.4265	5.9647	5.63354	5.74473	5.90291	5.81147	0.31599	0.307755	0.132914	0.79164	0.653606	0.69995	0.765883	-13.1595	0.000807357	0.00648486	0.312	0.728	-0.416
ENSOCUG00000002864	ENSMUSG00000061132	MGI:96878	Blnk	609	873	953	4733	2692	2406	3809	11.3	14.219	14.055	81.768	49.662	54.436	75.869	P	P	3.49826	3.82973	3.813	3.71366	6.35346	5.63408	5.76648	6.24543	5.99986	-0.233718	-0.0601917	-0.0689481	0.953683	0.65383	0.709016	0.908655	-8.36669	0.00673083	0.0243386	-0.147	0.8065	-0.9535
ENSOCUG00000010114	ENSMUSG00000090247	MGI:1195276	Bloc1s1	159	166	168	1583	1888	1272	922	2.95	2.704	2.478	27.348	34.83	28.779	18.365	A	P	1.56084	1.43493	1.30898	1.43492	4.77337	5.12226	4.84694	4.19886	4.73536	-1.24796	-1.31388	-1.37981	0.295066	0.440492	0.325733	0.0555996	-17.899	8.70418e-05	0.00231513	-1.281	0.27925	-1.56025
ENSOCUG00000013141	ENSMUSG00000057506	MGI:1920939	Bloc1s2	125	253	242	996	715	758	901	2.319	4.121	3.569	17.207	13.19	17.15	17.946	A	P	1.21374	2.04288	1.83553	1.69738	4.10492	3.72142	4.10011	4.16562	4.02302	-1.42967	-0.995612	-1.10416	0.0164444	-0.143409	0.0144383	0.0417446	-5.40662	0.103826	0.166187	-1.213	-0.01775	-1.19525
ENSOCUG00000014694	ENSMUSG00000060708	MGI:1929230	Bloc1s4	211	222	214	378	383	299	169	3.915	3.616	3.156	6.53	7.066	6.765	3.366	A	P	1.96906	1.8543	1.65813	1.82717	2.70716	2.82082	2.75806	1.75112	2.50929	-1.03426	-1.09433	-1.19703	-0.566172	-0.518798	-0.544958	-0.964672	-3.77421	0.0256851	0.0626334	-1.064	-0.64875	-0.41525
ENSOCUG00000025755	ENSMUSG00000038982	MGI:2178598	Bloc1s5	334	549	400	537	414	305	528	6.197	8.942	5.899	9.277	7.638	6.901	10.517	P	P	2.63166	3.16055	2.56052	2.78425	3.2137	2.9331	2.78672	3.39463	3.08204	-0.687383	-0.410508	-0.724624	-0.355037	-0.471995	-0.53301	-0.27962	-0.931116	0.487307	0.546464	-0.549	-0.41	-0.139
ENSOCUG00000017351	ENSMUSG00000005804	MGI:1927580	Bloc1s6	434	642	569	597	296	328	387	8.053	10.456	8.392	10.314	5.461	7.421	7.708	P	P	3.00951	3.38632	3.06895	3.15493	3.36651	2.44907	2.89161	2.94643	2.9134	-0.489579	-0.292318	-0.45846	-0.291343	-0.67375	-0.489291	-0.466441	0.704992	0.544458	0.600107	-0.391	-0.48	0.089
ENSOCUG00000006916	ENSMUSG00000001999	MGI:88170	Blvra	495	762	730	352	508	413	302	9.185	12.411	10.766	6.081	9.372	9.344	6.015	P	P	3.19924	3.63354	3.42842	3.4204	2.60435	3.2283	3.22405	2.58864	2.91134	-0.390253	-0.162898	-0.270277	-0.609025	-0.34895	-0.350721	-0.615574	1.50023	0.274717	0.344174	-0.2765	-0.48125	0.20475
ENSOCUG00000002791	ENSMUSG00000040466	MGI:2385271	Blvrb	762	816	1068	7898	6342	4837	4421	14.139	13.29	15.751	136.447	116.998	109.437	88.059	P	P	3.8216	3.73231	3.97736	3.84376	7.09219	6.87034	6.77395	6.46039	6.79922	-0.0644433	-0.111188	0.0170969	1.2616	1.16913	1.12895	0.998255	-20.5848	4.70345e-05	0.00180832	-0.0875	1.1395	-1.227
ENSOCUG00000008982	ENSMUSG00000026577	MGI:1201607	Blzf1	594	782	627	1504	1058	925	1370	11.022	12.737	9.247	25.983	19.518	20.928	27.288	P	P	3.46228	3.67091	3.20899	3.44739	4.69951	4.28674	4.38736	4.7702	4.53595	-0.252553	-0.143331	-0.38515	0.264281	0.0922302	0.134173	0.293745	-5.34568	0.0172392	0.0474065	-0.198	0.196	-0.394
ENSOCUG00000006524	ENSMUSG00000040093	MGI:2176433	Bmf	634	547	597	259	195	109	155	11.764	8.909	8.805	4.475	3.597	2.466	3.087	P	A	3.5563	3.15529	3.13825	3.28328	2.16173	1.84695	1.30224	1.62636	1.73432	-0.203333	-0.413264	-0.42218	-0.79352	-0.924728	-1.15177	-1.01667	5.13539	0.0320045	0.0729952	-0.308	-0.972	0.664
ENSOCUG00000005420	ENSMUSG00000026739	MGI:88174	Bmi1	1116	1595	1329	749	696	588	1008	20.707	25.978	19.6	12.94	12.84	13.303	20.078	P	P	4.37208	4.69923	4.29279	4.4547	3.69374	3.68256	3.73373	4.32752	3.85939	0.223732	0.394997	0.182225	-0.154944	-0.159605	-0.138277	0.109227	3.67888	0.0556505	0.107019	0.3095	-0.086	0.3955
ENSOCUG00000010592	ENSMUSG00000022098	MGI:88176	Bmp1	4817	5598	6267	8807	8280	8455	6556	89.38	91.176	92.426	152.15	152.75	191.293	130.584	P	P	6.48188	6.51058	6.53023	6.50756	7.24935	7.25503	7.57964	7.02884	7.27822	1.32822	1.34325	1.35353	1.32711	1.32948	1.46478	1.23519	-0.0729655	0.946227	0.955956	1.3355	1.339	-0.0035
ENSOCUG00000011578	ENSMUSG00000034663	MGI:2155456	Bmp2k	1424	2089	1722	2232	1080	1041	1943	26.422	34.024	25.396	38.56	19.924	23.553	38.701	P	P	4.72369	5.08849	4.66654	4.82624	5.26904	4.31643	4.55781	5.27431	4.8544	0.407802	0.598774	0.377882	0.501674	0.104606	0.205218	0.503869	1.2455	0.296092	0.365031	0.5035	0.329	0.1745
ENSOCUG00000000658	ENSMUSG00000029335	MGI:88179	Bmp3	603	934	670	338	266	502	626	11.189	15.212	9.881	5.839	4.907	11.358	12.469	P	P	3.48397	3.92717	3.30468	3.57194	2.5458	2.2949	3.5056	3.64026	2.99664	-0.241196	-0.00918101	-0.335053	-0.633431	-0.738012	-0.233366	-0.177239	1.75533	0.163082	0.230601	-0.125	-0.44525	0.32025
ENSOCUG00000011097	ENSMUSG00000021835	MGI:88180	Bmp4	694	600	953	2441	2914	1452	1631	12.877	9.772	14.055	42.171	53.758	32.851	32.487	P	P	3.68675	3.28871	3.813	3.59615	5.39818	5.7484	5.03788	5.02178	5.30156	-0.135041	-0.343417	-0.0689481	0.555501	0.701482	0.405322	0.398609	-5.96871	0.0261176	0.0634639	-0.239	0.51525	-0.75425
ENSOCUG00000003431	ENSMUSG00000039004	MGI:88182	Bmp6	1490	1153	1940	8098	7917	5700	5260	27.647	18.779	28.611	139.902	146.054	128.962	104.77	P	P	4.78905	4.23107	4.83851	4.61954	7.12827	7.19035	7.0108	6.71108	7.01013	0.44202	0.149911	0.46791	1.27664	1.30252	1.22768	1.10275	-6.10581	0.0765842	0.13415	0.296	1.22775	-0.93175
ENSOCUG00000012615	ENSMUSG00000031963	MGI:1920480	Bmper	528	569	538	438	372	366	424	9.797	9.267	7.934	7.567	6.863	8.281	8.445	P	P	3.29235	3.21217	2.98813	3.16422	2.91971	2.77878	3.04975	3.07816	2.9566	-0.341509	-0.383483	-0.500771	-0.477579	-0.536322	-0.423372	-0.411533	2.84076	0.0492453	0.0979969	-0.3625	-0.46225	0.09975
ENSOCUG00000016925	ENSMUSG00000021796	MGI:1338938	Bmpr1a	5739	5433	5061	2205	2857	2303	3118	106.488	88.489	74.64	38.094	52.706	52.105	62.105	P	P	6.73454	6.46742	6.22187	6.47461	5.25148	5.7199	5.70335	5.95664	5.65784	1.46049	1.32065	1.19211	0.494356	0.689603	0.682705	0.788281	7.83387	0.00675713	0.0243862	1.3905	0.66375	0.72675
ENSOCUG00000015048	ENSMUSG00000052430	MGI:107191	Bmpr1b	414	524	393	257	321	462	452	7.682	8.535	5.796	4.44	5.922	10.453	9.003	P	P	2.94144	3.09331	2.53505	2.8566	2.15054	2.56605	3.3858	3.17042	2.8182	-0.525211	-0.445708	-0.737958	-0.798182	-0.624992	-0.283299	-0.373078	0.275987	0.797752	0.829829	-0.4855	-0.51975	0.03425
ENSOCUG00000001971	ENSMUSG00000067336	MGI:1095407	Bmpr2	8620	12286	9230	1743	1233	867	1262	159.945	200.105	136.124	30.112	22.747	19.616	25.137	P	P	7.32143	7.64462	7.08878	7.35161	4.91228	4.50757	4.29394	4.65173	4.59138	1.76773	1.93692	1.64594	0.352967	0.184278	0.0952325	0.244367	16.2764	0.00482364	0.0194606	1.8525	0.219	1.6335
ENSOCUG00000005354	ENSMUSG00000030138	MGI:2446132	Bms1	1332	1592	1614	1643	1252	992	1423	24.715	25.929	23.803	28.385	23.097	22.444	28.344	P	P	4.62734	4.69651	4.57309	4.63231	4.82704	4.52964	4.48825	4.82496	4.66747	0.35736	0.393575	0.328963	0.317437	0.193474	0.176224	0.31657	2.92635	0.0440409	0.0910878	0.3755	0.25075	0.12475
ENSOCUG00000010795	ENSMUSG00000042742	MGI:2141466	Bmt2	883	1354	1147	1264	1252	1396	1160	16.384	22.053	16.916	21.837	23.097	31.584	23.105	P	P	4.03423	4.4629	4.08032	4.19248	4.4487	4.52964	4.98114	4.53015	4.6224	0.0468654	0.271278	0.0709935	0.159739	0.193474	0.38167	0.193687	-0.596138	0.631593	0.681099	0.159	0.23225	-0.07325
ENSOCUG00000017771	ENSMUSG00000031377	MGI:1101778	Bmx	615	613	891	886	1048	511	453	11.411	9.984	13.141	15.307	19.334	11.561	9.023	P	P	3.5124	3.31963	3.71595	3.51599	3.93608	4.27304	3.53123	3.1736	3.72849	-0.226313	-0.327228	-0.119755	-0.0539313	0.0865194	-0.222681	-0.371749	-1.21545	0.291733	0.360799	-0.2765	-0.1405	-0.136
ENSOCUG00000004460	ENSMUSG00000028487	MGI:2443805	Bnc2	290	403	366	507	380	267	404	5.381	6.564	5.398	8.759	7.01	6.041	8.047	P	P	2.42787	2.71452	2.43237	2.52492	3.13076	2.80947	2.59475	3.00845	2.88586	-0.794071	-0.644004	-0.791715	-0.389606	-0.523527	-0.613027	-0.440589	-2.53569	0.132123	0.197687	-0.719	-0.492	-0.227
ENSOCUG00000000040	ENSMUSG00000024191	MGI:109328	Bnip1	240	344	319	408	248	227	274	4.453	5.603	4.705	7.049	4.575	5.136	5.458	A	P	2.15485	2.48615	2.23408	2.29169	2.81735	2.19381	2.3606	2.44827	2.45501	-0.936997	-0.763558	-0.895519	-0.520245	-0.780147	-0.710625	-0.674084	-1.74876	0.231063	0.300595	-0.8505	-0.67125	-0.17925
ENSOCUG00000006277	ENSMUSG00000011958	MGI:109327	Bnip2	4134	4445	4169	1390	821	772	992	76.707	72.397	61.485	24.014	15.146	17.466	19.759	P	P	6.26128	6.17786	5.94215	6.1271	4.58579	3.92085	4.12651	4.30443	4.2344	1.21274	1.16906	1.04567	0.21688	-0.0602787	0.0254437	0.0996048	17.8584	0.000103352	0.00243716	1.191	0.0705	1.1205
ENSOCUG00000002541	ENSMUSG00000078566	MGI:109326	Bnip3	414	584	365	5877	3680	3289	4270	7.682	9.512	5.383	101.532	67.889	74.413	85.051	P	P	2.94144	3.24971	2.42842	2.87319	6.66578	6.08511	6.21749	6.41026	6.34466	-0.525211	-0.363831	-0.793781	1.08387	0.841828	0.897007	0.977357	-14.5045	0.00557594	0.0214886	-0.4445	0.95	-1.3945
ENSOCUG00000010542	ENSMUSG00000022051	MGI:1332659	Bnip3l	2146	2974	3380	6737	4233	3784	5686	39.819	48.438	49.848	116.389	78.091	85.613	113.255	P	P	5.31539	5.59808	5.63947	5.51765	6.86281	6.28708	6.41975	6.82343	6.59827	0.71756	0.865547	0.887219	1.16599	0.926015	0.981315	1.14958	-2.7652	0.0893356	0.149848	0.792	1.05575	-0.26375
ENSOCUG00000010827	ENSMUSG00000022687	MGI:2151153	Boc	2343	1827	2628	3225	3073	2611	3210	43.475	29.757	38.758	55.715	56.691	59.074	63.938	P	P	5.4421	4.89515	5.27642	5.20456	5.8	5.82505	5.88444	5.99859	5.87702	0.783892	0.497562	0.697157	0.722991	0.73343	0.758186	0.805768	-0.790597	0.570588	0.62459	0.641	0.755	-0.114
ENSOCUG00000014283	ENSMUSG00000044502	MGI:1916806	Bod1	561	852	626	190	190	112	140	10.409	13.877	9.232	3.282	3.505	2.534	2.789	P	A	3.37981	3.7946	3.20669	3.46037	1.71478	1.80947	1.34141	1.47952	1.58629	-0.295722	-0.0785815	-0.386356	-0.97982	-0.940348	-1.13545	-1.07788	7.20922	0.0482263	0.096761	-0.1875	-1.03325	0.84575
ENSOCUG00000009041	ENSMUSG00000061755	MGI:2444804	Bod1l	3783	5044	4698	4136	3939	3618	3958	70.194	82.153	69.286	71.454	72.667	81.857	78.837	P	P	6.13327	6.36024	6.1145	6.20267	6.15894	6.18323	6.35503	6.30079	6.2495	1.14572	1.26454	1.1359	0.872603	0.882728	0.954338	0.93173	4.71372	0.0995454	0.161299	1.2055	0.9105	0.295
ENSOCUG00000021536	ENSMUSG00000026278	MGI:1858494	Bok	353	407	455	446	719	476	467	6.55	6.629	6.71	7.705	13.264	10.769	9.302	P	P	2.71148	2.72877	2.74639	2.72888	2.94582	3.72946	3.42887	3.21752	3.33042	-0.645597	-0.636545	-0.627323	-0.466694	-0.140054	-0.265347	-0.353446	-4.83851	0.0165142	0.0458503	-0.6415	-0.30625	-0.33525
ENSOCUG00000004609	ENSMUSG00000015943	MGI:1916418	Bola1	108	130	88	626	637	494	419	2.004	2.117	1.298	10.815	11.751	11.177	8.346	A	P	1.00285	1.08226	0.376099	0.8204	3.43494	3.55477	3.48242	3.06104	3.38329	-1.54008	-1.4985	-1.86818	-0.262819	-0.212872	-0.243027	-0.418667	-24.5249	2.2396e-05	0.00128144	-1.5195	-0.2845	-1.235
ENSOCUG00000007562	ENSMUSG00000047721	MGI:1913412	Bola2	369	598	494	2359	2568	1969	1416	6.847	9.74	7.286	40.754	47.375	44.548	28.204	P	P	2.77543	3.28389	2.86503	2.97479	5.34888	5.56605	5.4773	4.81784	5.30252	-0.612118	-0.345939	-0.565212	0.534953	0.625472	0.588482	0.313605	-6.62391	0.0385086	0.0832755	-0.479	0.5155	-0.9945
ENSOCUG00000006658	ENSMUSG00000022070	MGI:1924994	Bora	117	131	185	938	774	670	850	2.171	2.134	2.728	16.205	14.279	15.159	16.931	A	P	1.11832	1.09331	1.44805	1.21989	4.01836	3.83581	3.92207	4.08156	3.96445	-1.47962	-1.49272	-1.30701	-0.0196347	-0.0957288	-0.0597712	0.00670482	-61.4354	2.3121e-06	0.000509325	-1.4865	-0.04225	-1.44425
ENSOCUG00000003144	ENSMUSG00000038871	MGI:1098242	Bpgm	635	927	1474	1365	1195	990	1596	11.782	15.098	21.739	23.582	22.045	22.399	31.79	P	P	3.55857	3.91631	4.44219	3.97236	4.55961	4.46241	4.48534	4.99048	4.62446	-0.202143	-0.0148627	0.260435	0.205966	0.165454	0.175011	0.385565	-3.19572	0.108796	0.171461	-0.1085	0.233	-0.3415
ENSOCUG00000009825	ENSMUSG00000038286	MGI:1915271	Bphl	332	219	302	800	952	820	765	6.16	3.567	4.454	13.821	17.563	18.552	15.237	A	P	2.623	1.83468	2.15507	2.20425	3.78878	4.13443	4.21354	3.92955	4.01657	-0.691919	-1.10461	-0.93688	-0.115332	0.0287457	0.0617167	-0.0566533	-4.17416	0.135898	0.201752	-0.8985	-0.02025	-0.87825
ENSOCUG00000007538	ENSMUSG00000027483	MGI:1338036	Bpifa1	401	197	421	0	0	0	0	7.441	3.209	6.209	0	0	0	0	P	A	2.89542	1.68194	2.63434	2.4039	-5.85508	-5.76038	-5.46595	-5.64976	-5.68279	-0.549307	-1.18457	-0.685979	-4.1351	-4.09563	-3.9729	-4.04952	9.9922	0.0603601	0.113498	-0.867	-4.0635	3.1965
ENSOCUG00000010408	ENSMUSG00000026617	MGI:1338800	Bpnt1	632	937	570	1076	558	583	662	11.727	15.261	8.406	18.589	10.294	13.19	13.186	P	P	3.55174	3.93179	3.07149	3.51834	4.21638	3.36374	3.72141	3.72092	3.75561	-0.205719	-0.00675902	-0.457134	0.0629035	-0.292497	-0.143413	-0.143614	0.182371	0.871015	0.893426	-0.1065	-0.129	0.0225
ENSOCUG00000015866	ENSMUSG00000040481	MGI:2444008	Bptf	5089	6405	6655	2461	2071	1392	1986	94.427	104.32	98.148	42.516	38.206	31.494	39.558	P	P	6.56112	6.70487	6.61689	6.62763	5.40995	5.25573	4.977	5.30589	5.23714	1.36971	1.44496	1.3989	0.560408	0.496125	0.379945	0.517032	17.1124	0.000375373	0.00449662	1.4075	0.48825	0.91925
ENSOCUG00000005487	ENSMUSG00000002413	MGI:88190	Braf	2698	3663	2720	666	460	271	630	50.062	59.66	40.115	11.506	8.486	6.131	12.549	P	P	5.64563	5.8987	5.32606	5.62346	3.5243	3.08511	2.6162	3.64944	3.21876	0.890442	1.02292	0.723144	-0.225572	-0.408637	-0.604085	-0.173408	11.0761	0.000428016	0.00480838	0.9565	-0.353	1.3095
ENSOCUG00000016878	ENSMUSG00000041147	MGI:109337	Brca2	281	367	347	379	212	310	273	5.214	5.977	5.118	6.548	3.911	7.014	5.438	P	P	2.38238	2.57952	2.35546	2.43912	2.71097	1.96754	2.81018	2.44299	2.48292	-0.817881	-0.714677	-0.831976	-0.564583	-0.874463	-0.523232	-0.676283	-1.14024	0.31865	0.387027	-0.7665	-0.6595	-0.107
ENSOCUG00000009730	ENSMUSG00000031201	MGI:2389572	Brcc3	541	812	568	522	376	302	552	10.038	13.225	8.377	9.018	6.936	6.833	10.995	P	P	3.32744	3.72522	3.06641	3.37303	3.17283	2.79421	2.77246	3.45876	3.04956	-0.323139	-0.114899	-0.459788	-0.372073	-0.52989	-0.538954	-0.252889	1.64171	0.246388	0.316594	-0.219	-0.4235	0.2045
ENSOCUG00000003432	ENSMUSG00000022387	MGI:1924161	Brd1	2168	2819	2673	900	731	537	577	40.227	45.914	39.422	15.548	13.486	12.15	11.493	P	P	5.33011	5.52086	5.30091	5.38396	3.9587	3.75334	3.60283	3.52266	3.70939	0.725263	0.825122	0.70998	-0.0445035	-0.130101	-0.192837	-0.226253	14.446	0.00235865	0.0120434	0.775	-0.1485	0.9235
ENSOCUG00000003097	ENSMUSG00000024335	MGI:99495	Brd2	4202	6031	5596	2837	1961	1374	3399	77.968	98.229	82.53	49.012	36.177	31.087	67.702	P	P	6.28482	6.61807	6.36685	6.42325	5.61507	5.17699	4.95822	6.08113	5.45785	1.22506	1.39952	1.268	0.645907	0.463305	0.372118	0.840171	5.39842	0.00836047	0.0282139	1.3125	0.58025	0.73225
ENSOCUG00000005097	ENSMUSG00000026918	MGI:1914632	Brd3	1153	1551	1622	1035	1287	771	709	21.394	25.262	23.921	17.881	23.743	17.444	14.122	P	P	4.41913	4.65887	4.58023	4.55274	4.16033	4.56941	4.12464	3.81988	4.16857	0.248366	0.373869	0.332698	0.0395418	0.210054	0.0246642	-0.102368	2.97999	0.0573878	0.10941	0.311	0.04325	0.26775
ENSOCUG00000013002	ENSMUSG00000024002	MGI:1888520	Brd4	1682	2570	2601	3217	2541	1837	2203	31.21	41.858	38.36	55.577	46.877	41.562	43.88	P	P	4.96392	5.38744	5.26152	5.20429	5.79642	5.5508	5.37719	5.45549	5.54497	0.533563	0.755278	0.689357	0.721497	0.619116	0.546753	0.57939	0.239741	0.843984	0.869736	0.6445	0.6165	0.028
ENSOCUG00000003102	ENSMUSG00000031660	MGI:1349766	Brd7	1166	1540	1535	9181	6207	5162	5829	21.635	25.082	22.638	158.612	114.507	116.79	116.104	P	P	4.43531	4.6486	4.50069	4.5282	7.30936	6.8393	6.86777	6.85927	6.96892	0.256834	0.368494	0.291061	1.35212	1.15619	1.16806	1.16452	-12.3091	0.00250505	0.0125407	0.3125	1.21025	-0.89775
ENSOCUG00000010143	ENSMUSG00000057649	MGI:2145317	Brd9	1376	1842	1593	1587	1147	965	1083	25.532	30.001	23.494	27.417	21.16	21.833	21.571	P	P	4.67422	4.90695	4.5542	4.71179	4.77701	4.40327	4.44844	4.43105	4.51494	0.381905	0.503737	0.319072	0.296584	0.140801	0.15963	0.152383	3.58885	0.0826201	0.141462	0.443	0.1875	0.2555
ENSOCUG00000015646	ENSMUSG00000011158	MGI:1919558	Brf1	1222	1622	1750	440	530	353	293	22.674	26.418	25.809	7.601	9.777	7.987	5.836	P	P	4.50299	4.72345	4.68981	4.63875	2.92628	3.28946	2.99758	2.54499	2.93958	0.292263	0.407674	0.390064	-0.474839	-0.323456	-0.44512	-0.633767	9.48517	0.00168094	0.00973244	0.35	-0.46925	0.81925
ENSOCUG00000001541	ENSMUSG00000037905	MGI:1924059	Bri3bp	440	718	514	326	193	185	150	8.164	11.694	7.58	5.632	3.56	4.186	2.988	P	A	3.02932	3.54773	2.92229	3.16645	2.49365	1.83207	2.06544	1.57906	1.99255	-0.479209	-0.207819	-0.535237	-0.655169	-0.930927	-0.833657	-1.03639	3.29756	0.0954269	0.156847	-0.3435	-0.864	0.5205
ENSOCUG00000014478	ENSMUSG00000022247	MGI:1915082	Brix1	396	509	485	1384	1273	979	1695	7.348	8.29	7.153	23.91	23.484	22.15	33.761	P	P	2.87731	3.05141	2.83851	2.92241	4.57955	4.55363	4.46922	5.07731	4.66993	-0.558783	-0.467643	-0.579098	0.214279	0.203477	0.168292	0.421755	-10.4263	0.000759363	0.00633261	-0.5135	0.25175	-0.76525
ENSOCUG00000006825	ENSMUSG00000012076	MGI:1196337	Brms1l	587	830	595	1247	1827	1609	1558	10.892	13.518	8.775	21.543	33.705	36.403	31.033	P	P	3.44517	3.75686	3.13341	3.44515	4.42917	5.07488	5.186	4.95572	4.91144	-0.261506	-0.0983396	-0.424714	0.151596	0.420743	0.467062	0.371074	-4.94943	0.0234182	0.0587388	-0.18	0.35275	-0.53275
ENSOCUG00000016381	ENSMUSG00000046836	MGI:1918928	Brox	1612	2728	1944	2703	2373	2087	2639	29.911	44.432	28.67	46.697	43.777	47.218	52.564	P	P	4.90259	5.47352	4.84148	5.07253	5.54527	5.45211	5.56127	5.71601	5.56867	0.501459	0.800339	0.469465	0.616811	0.577982	0.623481	0.687981	0.1587	0.898909	0.91728	0.6505	0.6265	0.024
ENSOCUG00000010099	ENSMUSG00000001632	MGI:1926033	Brpf1	1011	1381	1427	1196	1101	631	854	18.759	22.493	21.045	20.662	20.311	14.276	17.01	P	P	4.22953	4.49139	4.39544	4.37212	4.36892	4.34422	3.83555	4.08833	4.15925	0.149104	0.28619	0.23596	0.126485	0.116187	-0.0958351	0.00952805	2.07419	0.15988	0.226933	0.2175	0.039	0.1785
ENSOCUG00000008621	ENSMUSG00000063952	MGI:2146836	Brpf3	667	860	1040	1085	1071	731	951	12.376	14.007	15.338	18.745	19.758	16.539	18.942	P	P	3.6295	3.80808	3.93904	3.79221	4.2284	4.30436	4.04778	4.24354	4.20602	-0.165011	-0.071523	-0.00296807	0.0679124	0.0995741	-0.00737246	0.0742226	-3.417	0.110127	0.173055	-0.1185	0.05875	-0.17725
ENSOCUG00000012750	ENSMUSG00000035390	MGI:2685946	Brsk1	194	562	283	136	286	197	132	3.6	9.153	4.174	2.35	5.276	4.457	2.629	P	A	1.84787	3.19431	2.06133	2.36784	1.23238	2.39949	2.15611	1.39463	1.79565	-1.0977	-0.392832	-0.985957	-1.18089	-0.694417	-0.795863	-1.11326	0.539046	0.670851	0.716051	-0.7455	-0.946	0.2005
ENSOCUG00000008870	ENSMUSG00000022914	MGI:1890651	Brwd1	4378	5480	5213	1308	956	837	1167	81.234	89.254	76.882	22.597	17.636	18.937	23.245	P	P	6.34401	6.47985	6.26457	6.36281	4.49807	4.14048	4.24314	4.53883	4.35513	1.25605	1.32716	1.21446	0.180316	0.0312671	0.0740562	0.197305	21.78	9.45044e-05	0.00236919	1.2915	0.1205	1.171
ENSOCUG00000005170	ENSMUSG00000063663	MGI:3029414	Brwd3	838	1140	941	336	168	156	220	15.549	18.567	13.878	5.805	3.099	3.529	4.382	P	A	3.95876	4.21471	3.79472	3.9894	2.53724	1.63193	1.81946	2.1316	2.03006	0.0073601	0.141347	-0.0785185	-0.637	-1.01435	-0.936186	-0.80608	8.68051	0.00156752	0.00935463	0.074	-0.84825	0.92225
ENSOCUG00000026008	ENSMUSG00000071657	MGI:1298392	Bscl2	1147	1510	1372	3588	4291	3031	3602	21.283	24.594	20.234	61.987	79.161	68.576	71.746	P	P	4.41161	4.62022	4.33873	4.45685	5.95388	6.30671	6.09963	6.16482	6.13126	0.244425	0.353636	0.206275	0.787131	0.934199	0.847883	0.875054	-8.93547	0.0213561	0.054985	0.299	0.861	-0.562
ENSOCUG00000011968	ENSMUSG00000040859	MGI:1913466	Bsdc1	853	1169	1137	1668	1342	971	1029	15.827	19.04	16.769	28.817	24.757	21.969	20.496	P	P	3.98436	4.25095	4.06768	4.101	4.84882	4.62979	4.45738	4.35726	4.57331	0.0207594	0.160319	0.0643801	0.326519	0.235219	0.163358	0.121626	-1.46484	0.286643	0.355725	0.0905	0.21175	-0.12125
ENSOCUG00000026072	ENSMUSG00000023175	MGI:88208	Bsg	5162	7030	5420	0	0	0	0	95.781	114.5	79.934	0	0	0	0	P	A	6.58167	6.8392	6.32074	6.58054	-5.85508	-5.76038	-5.46595	-5.64976	-5.68279	1.38046	1.51528	1.24387	-4.1351	-4.09563	-3.9729	-4.04952	72.5634	0.000949985	0.00705921	1.4475	-4.0635	5.511
ENSOCUG00000004981	ENSMUSG00000032589	MGI:1277955	Bsn	144	1337	285	14	18	4	7	2.672	21.776	4.203	0.242	0.332	0.09	0.139	P	A	1.41788	4.44467	2.07149	2.64468	-2.04773	-1.59046	-3.46595	-2.84241	-2.48663	-1.3228	0.261735	-0.980638	-2.54811	-2.35751	-3.13925	-2.87935	2.71246	0.206658	0.275696	-0.5305	-2.731	2.2005
ENSOCUG00000002336	ENSMUSG00000029082	MGI:105370	Bst1	400	642	497	663	1220	1554	1219	7.422	10.456	7.33	11.454	22.507	35.159	24.28	P	P	2.89181	3.38632	2.87377	3.05063	3.51779	4.49228	5.13583	4.60172	4.4369	-0.551193	-0.292318	-0.560639	-0.228287	0.177904	0.446147	0.22352	-3.01787	0.0514834	0.100964	-0.4215	0.155	-0.5765
ENSOCUG00000010433	ENSMUSG00000040565	MGI:2147538	Btaf1	2466	3339	3009	1903	1161	908	1568	45.757	54.383	44.377	32.876	21.418	20.543	31.232	P	P	5.51591	5.76509	5.47174	5.58425	5.03898	4.42077	4.3606	4.96495	4.69632	0.822535	0.952978	0.799407	0.40578	0.148096	0.123018	0.374921	6.3427	0.00548167	0.0212393	0.888	0.263	0.625
ENSOCUG00000014030	ENSMUSG00000025103	MGI:1933765	Btbd1	1408	1802	1512	2879	1777	1784	2436	26.126	29.35	22.299	49.738	32.782	40.363	48.521	P	P	4.70739	4.87527	4.47891	4.68719	5.63627	5.03484	5.33495	5.60053	5.40165	0.399268	0.487156	0.279658	0.654744	0.404056	0.529149	0.639848	-1.56201	0.198124	0.267385	0.443	0.557	-0.114
ENSOCUG00000005952	ENSMUSG00000038187	MGI:1916065	Btbd10	632	894	575	710	619	564	736	11.727	14.561	8.48	12.266	11.419	12.76	14.66	P	P	3.55174	3.86402	3.08409	3.49995	3.6166	3.51341	3.67361	3.8738	3.66935	-0.205719	-0.0422391	-0.450538	-0.187101	-0.23011	-0.163337	-0.0798928	0.466668	0.706547	0.747914	-0.124	-0.165	0.041
ENSOCUG00000002716	ENSMUSG00000020042	MGI:1921257	Btbd11	156	174	144	3767	2716	2003	3163	2.895	2.834	2.124	65.079	50.105	45.318	63.002	A	P	1.53336	1.50283	1.08659	1.37426	6.02412	5.64688	5.502	5.97731	5.78758	-1.26235	-1.27833	-1.49623	0.816407	0.659167	0.598777	0.796898	-37.2042	2.97449e-05	0.00147473	-1.27	0.71775	-1.98775
ENSOCUG00000029627	ENSMUSG00000086598	MGI:3650217	Btbd18	4	4	6	1620	1317	1092	541	0.074	0.065	0.088	27.987	24.296	24.706	10.776	A	P	-3.75204	-3.94011	-3.49837	-3.73017	4.8067	4.60266	4.62681	3.42972	4.36647	-4.02928	-4.12773	-3.89648	0.30896	0.223911	0.233979	-0.264994	-29.9118	1.54538e-05	0.00113022	-4.0785	0.1255	-4.204
ENSOCUG00000024804	ENSMUSG00000073771	MGI:1925861	Btbd19	153	219	236	1028	757	453	301	2.839	3.567	3.481	17.76	13.965	10.249	5.995	A	P	1.50535	1.83468	1.79931	1.71311	4.15054	3.80377	3.35742	2.58386	3.4739	-1.27701	-1.10461	-1.12312	0.0354609	-0.109084	-0.295129	-0.617568	-5.71779	0.00466283	0.0189851	-1.191	-0.24675	-0.94425
ENSOCUG00000016434	ENSMUSG00000062098	MGI:2385155	Btbd3	486	810	631	1141	862	1378	1251	9.018	13.193	9.306	19.712	15.902	31.177	24.918	P	P	3.17277	3.72167	3.21816	3.37087	4.301	3.99116	4.96242	4.6391	4.47342	-0.404111	-0.116761	-0.380347	0.0981752	-0.0309738	0.373866	0.239102	-2.56106	0.138183	0.204086	-0.2605	0.17	-0.4305
ENSOCUG00000020971	ENSMUSG00000002803	MGI:3026623	Btbd6	430	619	573	1622	1662	1195	1046	7.979	10.082	8.451	28.022	30.661	27.037	20.835	P	P	2.99615	3.33368	3.07906	3.1363	4.80848	4.93832	4.75685	4.3809	4.72114	-0.496572	-0.319872	-0.453169	0.309702	0.363823	0.288182	0.13148	-6.70594	0.0328231	0.0744046	-0.4085	0.27325	-0.68175
ENSOCUG00000006207	ENSMUSG00000041702	MGI:1917858	Btbd7	3740	4363	4041	2193	2254	1857	2170	69.396	71.061	59.597	37.886	41.582	42.014	43.223	P	P	6.11678	6.15099	5.89716	6.05498	5.24361	5.37789	5.39281	5.43372	5.36201	1.13709	1.155	1.02212	0.491074	0.547044	0.553265	0.570314	31.313	6.55905e-06	0.000762195	1.146	0.54025	0.60575
ENSOCUG00000011062	ENSMUSG00000111375	MGI:3646208	Btbd8	224	544	276	287	256	204	278	4.156	8.86	4.07	4.958	4.723	4.615	5.537	P	A	2.05531	3.14735	2.02519	2.40929	2.30983	2.23962	2.20648	2.46918	2.30628	-0.989104	-0.417418	-1.00487	-0.73179	-0.761055	-0.774867	-0.665369	0.105385	0.932968	0.945409	-0.703	-0.73325	0.03025
ENSOCUG00000008562	ENSMUSG00000021900	MGI:1347001	Btd	588	560	612	378	323	255	298	10.91	9.121	9.026	6.53	5.959	5.769	5.936	P	P	3.44763	3.18917	3.17406	3.27029	2.70716	2.57501	2.52841	2.56941	2.595	-0.260221	-0.395525	-0.403438	-0.566172	-0.621257	-0.64068	-0.623592	4.07608	0.132871	0.198501	-0.328	-0.613	0.285
ENSOCUG00000024914	ENSMUSG00000021660	MGI:1202875	Btf3	2046	2609	2103	17182	13414	12139	16296	37.964	42.493	31.015	296.838	247.463	274.644	324.588	P	P	5.24655	5.40917	4.9549	5.20354	8.21353	7.95107	8.10142	8.34247	8.15212	0.68152	0.766653	0.528841	1.729	1.6196	1.68227	1.78274	-17.8542	0.00126687	0.00834075	0.7245	1.7035	-0.979
ENSOCUG00000008223	ENSMUSG00000036478	MGI:88215	Btg1	2313	3728	2775	2108	1429	1104	2074	42.918	60.719	40.926	36.418	26.362	24.978	41.311	P	P	5.42351	5.92407	5.35494	5.56751	5.18658	4.72041	4.64258	5.36844	4.9795	0.774159	1.03621	0.738263	0.467302	0.272992	0.240552	0.543104	3.48794	0.0939191	0.15526	0.905	0.381	0.524
ENSOCUG00000004422	ENSMUSG00000020423	MGI:108384	Btg2	1136	1359	1157	14629	13704	5914	8874	21.079	22.134	17.063	252.732	252.813	133.804	176.755	P	P	4.3977	4.46822	4.09284	4.31959	7.98146	7.98193	7.06397	7.46561	7.62324	0.237147	0.274061	0.0775496	1.63227	1.63246	1.24984	1.41725	-12.9873	0.000676376	0.00605254	0.2555	1.48275	-1.22725
ENSOCUG00000014697	ENSMUSG00000022863	MGI:109532	Btg3	133	133	141	820	508	537	694	2.468	2.166	2.079	14.166	9.372	12.15	13.823	A	P	1.30324	1.11517	1.05622	1.15821	3.8244	3.2283	3.60283	3.78903	3.61114	-1.38282	-1.48127	-1.51213	-0.100483	-0.34895	-0.192837	-0.115227	-16.5303	0.000212458	0.00333858	-1.432	-0.18925	-1.24275
ENSOCUG00000010621	ENSMUSG00000031264	MGI:88216	Btk	237	396	438	2072	695	613	1119	4.398	6.45	6.46	35.796	12.821	13.869	22.289	P	P	2.1367	2.68925	2.69145	2.5058	5.16173	3.68049	3.7938	4.47823	4.27856	-0.946497	-0.657238	-0.656082	0.456944	-0.16047	-0.113239	0.172048	-4.38151	0.0225176	0.0571429	-0.8015	0.089	-0.8905
ENSOCUG00000015353	ENSMUSG00000025217	MGI:1338871	Btrc	809	1405	878	802	798	552	898	15.011	22.884	12.949	13.855	14.722	12.489	17.887	P	P	3.90795	4.51624	3.69474	4.03965	3.79238	3.87986	3.64258	4.16081	3.86891	-0.0192394	0.299202	-0.130855	-0.11383	-0.0773657	-0.17627	0.039739	1.34099	0.383413	0.449387	0.14	-0.08175	0.22175
ENSOCUG00000006527	ENSMUSG00000040084	MGI:1333889	Bub1b	253	288	352	915	321	408	470	4.694	4.691	5.191	15.808	5.922	9.231	9.362	A	P	2.23095	2.22981	2.3761	2.27895	3.98255	2.56605	3.20648	3.22675	3.24546	-0.897157	-0.897752	-0.821171	-0.0345637	-0.624992	-0.358045	-0.349595	-4.60444	0.0192608	0.0513709	-0.8975	-0.342	-0.5555
ENSOCUG00000017446	ENSMUSG00000066979	MGI:1343463	Bub3	1083	2126	1203	2076	1599	1464	1835	20.095	34.627	17.742	35.865	29.499	33.123	36.55	P	P	4.32878	5.11381	4.14909	4.53056	5.16451	4.88257	5.04975	5.1918	5.07216	0.201062	0.612034	0.106996	0.458104	0.340585	0.410271	0.469479	-0.0626341	0.959875	0.967333	0.4065	0.4195	-0.013
ENSOCUG00000004615	ENSMUSG00000032077	MGI:2443443	Bud13	209	259	258	461	419	365	345	3.878	4.218	3.805	7.964	7.73	8.258	6.872	A	P	1.95532	2.0767	1.92789	1.98664	2.99354	2.95042	3.04581	2.78069	2.94262	-1.04145	-0.97791	-1.05581	-0.446802	-0.464776	-0.425017	-0.535524	-13.6636	0.00329322	0.0148976	-1.0095	-0.46825	-0.54125
ENSOCUG00000017297	ENSMUSG00000005378	MGI:1913388	Bud23	333	422	386	978	857	634	610	6.179	6.873	5.693	16.896	15.81	14.344	12.15	P	P	2.62734	2.78099	2.50912	2.63915	4.07861	3.98277	3.84239	3.6029	3.87667	-0.689648	-0.609211	-0.751532	0.00547732	-0.034472	-0.0929828	-0.192808	-9.65252	0.00183434	0.010225	-0.6495	-0.07875	-0.57075
ENSOCUG00000010576	ENSMUSG00000038722	MGI:2141291	Bud31	427	645	475	2316	2228	1795	1894	7.923	10.505	7.005	40.011	41.102	40.612	37.725	P	P	2.98605	3.39304	2.80845	3.06251	5.32234	5.36115	5.34382	5.23746	5.31619	-0.50186	-0.288797	-0.594833	0.52389	0.540067	0.532845	0.488509	-8.56212	0.0708066	0.126722	-0.3955	0.5215	-0.917
ENSOCUG00000017567	ENSMUSG00000023988	MGI:1858419	Bysl	347	438	374	507	386	323	377	6.439	7.134	5.516	8.759	7.121	7.308	7.509	P	P	2.68675	2.83468	2.46356	2.66166	3.13076	2.83207	2.86945	2.90866	2.93523	-0.658545	-0.581105	-0.775384	-0.389606	-0.514106	-0.498529	-0.482184	-3.10352	0.0847064	0.14402	-0.62	-0.47125	-0.14875
ENSOCUG00000010647	ENSMUSG00000051223	MGI:1914132	Bzw1	3915	5700	4236	11430	6817	7767	9839	72.643	92.837	62.473	197.466	125.761	175.728	195.976	P	P	6.18275	6.53663	5.96515	6.22818	7.62546	6.97454	7.4572	7.61453	7.41793	1.17163	1.35689	1.05771	1.48388	1.21256	1.41374	1.47933	-1.1852	0.356832	0.424109	1.2645	1.3975	-0.133
ENSOCUG00000016419	ENSMUSG00000020547	MGI:1914162	Bzw2	391	723	468	2014	1598	1307	1776	7.255	11.776	6.902	34.794	29.48	29.571	35.375	P	P	2.85898	3.55774	2.78703	3.06792	5.12077	4.88167	4.8861	5.14465	5.0083	-0.56838	-0.202577	-0.606046	0.439871	0.340209	0.342056	0.449826	-4.20891	0.138534	0.204432	-0.3855	0.393	-0.7785
ENSOCUG00000027244	ENSMUSG00000044092	MGI:2442694	C130050O18Rik	101	215	126	606	375	296	250	1.874	3.502	1.858	10.469	6.918	6.697	4.98	A	P	0.906169	1.80808	0.893947	1.20273	3.38809	2.79036	2.74351	2.31602	2.8095	-1.59069	-1.11853	-1.59708	-0.282345	-0.531492	-0.551022	-0.729208	-3.28411	0.138313	0.204215	-1.355	-0.52325	-0.83175
ENSOCUG00000026893	ENSMUSG00000039349	MGI:2444831	C130074G19Rik	711	646	836	808	984	788	732	13.193	10.522	12.329	13.959	18.153	17.828	14.58	P	P	3.72166	3.39528	3.62403	3.58032	3.80313	4.18213	4.15611	3.86594	4.00183	-0.116763	-0.287627	-0.167876	-0.109348	0.0486268	0.0377794	-0.0831699	-1.86145	0.246235	0.316439	-0.2025	-0.02625	-0.17625
ENSOCUG00000025587	ENSMUSG00000000581	MGI:1927354	C1d	715	1264	849	4	0	9	2	13.267	20.587	12.521	0.069	0	0.204	0.04	P	A	3.72976	4.36367	3.64629	3.91324	-3.85508	-5.76038	-2.29602	-4.64976	-4.14031	-0.112526	0.21933	-0.156222	-3.30145	-4.09563	-2.65161	-3.6327	10.0376	0.000559796	0.0055594	0.053	-3.4205	3.4735
ENSOCUG00000026002	ENSMUSG00000042460	MGI:2151071	C1galt1	1720	1926	1640	82	65	69	114	31.915	31.369	24.187	1.417	1.199	1.561	2.271	P	A	4.99615	4.97128	4.59615	4.85453	0.502472	0.261984	0.642579	1.18313	0.647541	0.550436	0.537416	0.341033	-1.48513	-1.58537	-1.42673	-1.20142	24.1202	0.000143232	0.00278483	0.5435	-1.4245	1.968
ENSOCUG00000004781	ENSMUSG00000048970	MGI:1913493	C1galt1c1	335	587	356	2044	1857	2032	2210	6.216	9.561	5.25	35.312	34.258	45.974	44.019	P	P	2.63598	3.25711	2.3924	2.76183	5.1421	5.09837	5.52274	5.46007	5.30582	-0.685125	-0.359961	-0.812637	0.448762	0.430537	0.607421	0.581298	-6.16567	0.0797469	0.137902	-0.5225	0.517	-1.0395
ENSOCUG00000029367	ENSMUSG00000036887	MGI:88223	C1qa	8356	13197	11177	2055	1487	3404	3280	155.046	214.943	164.839	35.502	27.432	77.015	65.332	P	P	7.27655	7.74781	7.36491	7.46309	5.14984	4.77781	6.26707	6.02972	5.55611	1.74424	1.99094	1.79049	0.45199	0.296917	0.917674	0.81874	6.47782	0.00455418	0.0187071	1.8675	0.6215	1.246
ENSOCUG00000004801	ENSMUSG00000018446	MGI:1194505	C1qbp	377	528	455	0	0	0	0	6.995	8.6	6.71	0	0	0	0	P	A	2.80638	3.10428	2.74639	2.88568	-5.85508	-5.76038	-5.46595	-5.64976	-5.68279	-0.595918	-0.439964	-0.627323	-4.1351	-4.09563	-3.9729	-4.04952	41.509	0.00367345	0.016042	-0.518	-4.0635	3.5455
ENSOCUG00000015138	ENSMUSG00000036896	MGI:88225	C1qc	7925	12373	11236	20137	6158	18796	7600	147.049	201.522	165.709	347.888	113.603	425.258	151.379	P	P	7.20015	7.6548	7.37251	7.40915	8.44248	6.82786	8.73219	7.24202	7.81114	1.70424	1.94225	1.79447	1.82443	1.15142	1.94519	1.32405	1.16127	0.310362	0.378972	1.823	1.561	0.262
ENSOCUG00000001991	ENSMUSG00000049630	MGI:2387350	C1ql3	19	24	28	987	652	824	863	0.353	0.391	0.413	17.051	12.028	18.643	17.189	A	P	-1.50411	-1.35515	-1.27598	-1.37841	4.09183	3.58834	4.22056	4.10345	4.00104	-2.85248	-2.77449	-2.73305	0.0109859	-0.198876	0.064643	0.0158323	-39.5379	2.90608e-06	0.00056535	-2.813	-0.02675	-2.78625
ENSOCUG00000003801	ENSMUSG00000017446	MGI:1919254	C1qtnf1	1041	1200	1285	930	742	1025	892	19.316	19.545	18.951	16.067	13.688	23.191	17.767	P	P	4.27171	4.28871	4.24422	4.26821	4.00601	3.77489	4.53546	4.15114	4.11687	0.17119	0.180087	0.156797	-0.0247855	-0.121119	0.195903	0.0357076	2.30916	0.103318	0.165646	0.1755	0.0215	0.154
ENSOCUG00000011735	ENSMUSG00000046491	MGI:1916433	C1qtnf2	660	423	580	444	816	537	593	12.246	6.89	8.554	7.671	15.054	12.15	11.812	P	P	3.61428	2.7844	3.09658	3.16509	2.93934	3.91204	3.60283	3.56212	3.50408	-0.172979	-0.607423	-0.443999	-0.469397	-0.0639522	-0.192837	-0.209805	-0.669537	0.600964	0.65321	-0.39	-0.234	-0.156
ENSOCUG00000026419	ENSMUSG00000058914	MGI:1932136	C1qtnf3	49	20	16	329	395	611	464	0.909	0.326	0.236	5.684	7.287	13.824	9.242	A	P	-0.137332	-1.61818	-2.08333	-1.27962	2.50686	2.86533	3.78908	3.20822	3.09237	-2.13696	-2.91219	-3.1557	-0.64966	-0.500246	-0.115204	-0.357321	-5.24674	0.092977	0.15428	-2.5245	-0.4055	-2.119
ENSOCUG00000022094	ENSMUSG00000079592	MGI:2385958	C1qtnf5	0	0	0	2003	2709	2238	1039	0	0	0	34.604	49.976	50.635	20.695	A	P	-5.75204	-5.94011	-6.08333	-5.92516	5.11287	5.64316	5.66205	4.37122	5.19732	-5.07629	-5.17474	-5.24972	0.436577	0.657615	0.665488	0.127442	-41.1984	4.28906e-06	0.000672897	-5.1255	0.47175	-5.59725
ENSOCUG00000016551	ENSMUSG00000061535	MGI:1925911	C1qtnf7	720	759	592	641	2476	1128	1583	13.36	12.362	8.731	11.074	45.678	25.521	31.531	P	P	3.73981	3.62784	3.12612	3.49793	3.4691	5.51341	4.67361	4.97868	4.6587	-0.107263	-0.165878	-0.428532	-0.24858	0.603533	0.253484	0.380646	-2.09691	0.122458	0.186613	-0.1365	0.24725	-0.38375
ENSOCUG00000014480	ENSMUSG00000055172	MGI:1355313	C1ra	4240	3732	4427	31700	28628	27955	28112	78.674	60.784	65.29	547.652	528.132	632.479	559.943	P	P	6.29781	5.92562	6.02878	6.08407	9.09712	9.04476	9.30487	9.12913	9.14397	1.23186	1.03702	1.09102	2.0973	2.07547	2.1839	2.11064	-9.79139	0.0506781	0.0998555	1.1345	2.11675	-0.98225
ENSOCUG00000014468	ENSMUSG00000079343	MGI:3644269	C1s2	120	111	133	34424	23473	36950	40399	2.227	1.808	1.961	594.712	433.032	835.99	804.678	A	P	1.15485	0.854304	0.97195	0.993701	9.21605	8.75833	9.70734	9.65227	9.3335	-1.4605	-1.61784	-1.55625	2.14687	1.95608	2.35165	2.3287	-30.8472	2.36714e-05	0.00130825	-1.5395	2.196	-3.7355
ENSOCUG00000006999	ENSMUSG00000024371	MGI:88226	C2	384	396	383	3767	1244	2599	2149	7.125	6.45	5.649	65.079	22.949	58.802	42.804	P	P	2.83292	2.68925	2.49787	2.67334	6.02412	4.52039	5.8778	5.41969	5.4605	-0.582024	-0.657238	-0.757425	0.816407	0.189619	0.755416	0.564466	-8.22828	0.00235781	0.0120434	-0.6195	0.58125	-1.20075
ENSOCUG00000015510	ENSMUSG00000045975	MGI:1891883	C2cd2	1029	1172	1277	958	1270	832	788	19.093	19.089	18.833	16.55	23.429	18.824	15.696	P	P	4.25498	4.25465	4.23521	4.24828	4.0488	4.55023	4.23449	3.97229	4.20145	0.162433	0.162255	0.152081	-0.00694763	0.202058	0.0704531	-0.0388401	1.96744	0.143805	0.209997	0.162	0.0565	0.1055
ENSOCUG00000010790	ENSMUSG00000032120	MGI:1919014	C2cd2l	526	1211	854	1475	1119	745	1060	9.76	19.724	12.595	25.482	20.643	16.856	21.113	P	P	3.28688	4.30187	3.65476	3.74784	4.67142	4.36761	4.07515	4.40009	4.37857	-0.344376	0.186978	-0.151787	0.252573	0.125939	0.00403553	0.139475	-0.77311	0.573628	0.627283	-0.0785	0.1305	-0.209
ENSOCUG00000004011	ENSMUSG00000047248	MGI:2142166	C2cd3	939	1197	1166	830	545	401	596	17.423	19.496	17.196	14.339	10.054	9.073	11.871	P	P	4.12294	4.2851	4.10402	4.17068	3.84189	3.32973	3.18151	3.56941	3.48063	0.0933063	0.178196	0.0834018	-0.0931939	-0.306673	-0.368452	-0.20677	5.14549	0.00744655	0.0260175	0.1355	-0.24375	0.37925
ENSOCUG00000017163	ENSMUSG00000030279	MGI:1921991	C2cd5	936	1462	1159	3600	3299	3038	3990	17.368	23.812	17.093	62.194	60.86	68.734	79.474	P	P	4.11832	4.57362	4.09533	4.26242	5.9587	5.92743	6.10296	6.31241	6.07538	0.0908895	0.329238	0.0788541	0.789139	0.776105	0.84927	0.936573	-5.04087	0.0949211	0.156279	0.21	0.83775	-0.62775
ENSOCUG00000008338	ENSMUSG00000024164	MGI:88227	C3	73296	62427	83686	15303	10411	10294	14061	1360.01	1016.76	1234.2	264.376	192.063	232.901	280.071	P	P	10.4094	9.98977	10.2694	10.2228	8.04645	7.58544	7.86357	8.12965	7.90628	3.3843	3.16462	3.31099	1.65936	1.4672	1.58313	1.69404	13.8927	0.016389	0.0455605	3.2745	1.60075	1.67375
ENSOCUG00000016730	ENSMUSG00000006423	MGI:1924894	C330007P06Rik	1005	1228	1115	1063	783	742	790	18.648	20.001	16.444	18.364	14.445	16.788	15.735	P	P	4.22094	4.32198	4.0395	4.19414	4.19885	3.85248	4.06933	3.97595	4.02415	0.144609	0.197507	0.0496232	0.0555939	-0.0887767	0.00160911	-0.0373158	4.65219	0.0139084	0.0407614	0.1715	-0.017	0.1885
ENSOCUG00000015863	ENSMUSG00000024592	MGI:1924672	C330018D20Rik	219	273	215	871	670	635	870	4.064	4.446	3.171	15.047	12.36	14.367	17.329	A	P	2.02274	2.15265	1.66486	1.94675	3.91145	3.62763	3.84467	4.11511	3.87471	-1.00615	-0.93815	-1.19351	-0.0641993	-0.1825	-0.0920351	0.0206902	-16.5602	0.000162848	0.00296247	-0.972	-0.07925	-0.89275
ENSOCUG00000007438	ENSMUSG00000040552	MGI:1097680	C3ar1	3560	5082	4985	1435	578	381	624	66.056	82.772	73.519	24.791	10.663	8.62	12.429	P	P	6.04562	6.37107	6.20005	6.20558	4.63175	3.41454	3.1077	3.63564	3.69741	1.09984	1.27021	1.18068	0.23604	-0.271321	-0.399218	-0.179163	8.2844	0.00117833	0.00803763	1.185	-0.15325	1.33825
ENSOCUG00000007039	ENSMUSG00000073418	MGI:88228	C4b	27419	32078	34322	29642	32599	34617	32869	508.762	522.463	506.182	512.098	601.39	783.206	654.694	P	P	8.99085	9.02919	8.98351	9.00118	9.00028	9.23216	9.61325	9.35468	9.30009	2.64168	2.66175	2.63784	2.05693	2.15359	2.31243	2.20465	8.69799	0.00246796	0.0123933	2.652	2.182	0.47
ENSOCUG00000022167	ENSMUSG00000049130	MGI:88232	C5ar1	432	636	537	6663	3713	3197	3567	8.016	10.359	7.92	115.111	68.498	72.332	71.048	P	P	3.00285	3.37277	2.98545	3.12035	6.84688	6.09799	6.17656	6.15073	6.31804	-0.493067	-0.299409	-0.502176	1.15935	0.847196	0.879947	0.869182	-10.9545	0.00544753	0.0211783	-0.396	0.93875	-1.33475
ENSOCUG00000005374	ENSMUSG00000079105	MGI:88235	C7	5873	3081	5819	21334	19144	23183	23371	108.974	50.181	85.819	368.568	353.17	524.513	465.51	P	P	6.76784	5.64907	6.42322	6.28004	8.52579	8.46422	9.03483	8.86267	8.72188	1.47792	0.892243	1.29751	1.85916	1.83349	2.07134	1.99957	-2.53215	0.22499	0.294586	1.185	1.94075	-0.75575
ENSOCUG00000009999	ENSMUSG00000050390	MGI:2140651	C77080	674	1319	1382	1134	940	508	602	12.506	21.483	20.382	19.591	17.341	11.493	11.991	P	P	3.64456	4.42512	4.34921	4.13963	4.29212	4.11613	3.52274	3.58386	3.87871	-0.157126	0.251498	0.21176	0.0944746	0.0211176	-0.226222	-0.200747	0.570638	0.650078	0.697706	0.047	-0.078	0.125
ENSOCUG00000011192	ENSMUSG00000046679	MGI:2141787	C87436	297	394	367	613	403	315	511	5.511	6.417	5.413	10.59	7.435	7.127	10.178	P	P	2.46228	2.68194	2.4363	2.52684	3.40466	2.89425	2.83326	3.34742	3.1199	-0.776057	-0.661062	-0.789654	-0.275438	-0.488189	-0.51361	-0.2993	-3.83099	0.0274277	0.0656955	-0.7185	-0.394	-0.3245
ENSOCUG00000015461	ENSMUSG00000028578	MGI:1915020	Caap1	262	369	275	647	482	568	744	4.861	6.01	4.056	11.178	8.892	12.851	14.819	A	P	2.28138	2.58737	2.01996	2.29623	3.48254	3.15251	3.6838	3.8894	3.55206	-0.870757	-0.710573	-1.00761	-0.242977	-0.380543	-0.159087	-0.0733917	-5.57729	0.019463	0.0517393	-0.791	-0.214	-0.577
ENSOCUG00000011358	ENSMUSG00000036707	MGI:107438	Cab39	3723	5538	4313	8632	6363	5677	8141	69.081	90.199	63.608	149.127	117.385	128.442	162.155	P	P	6.11021	6.49504	5.99114	6.1988	7.2204	6.87511	7.00497	7.34123	7.11043	1.13365	1.33511	1.07132	1.31504	1.17112	1.22525	1.36541	-0.314858	0.793444	0.825877	1.2345	1.269	-0.0345
ENSOCUG00000008239	ENSMUSG00000021981	MGI:1914081	Cab39l	1143	1519	1144	833	781	822	1184	21.208	24.74	16.872	14.391	14.408	18.598	23.583	P	P	4.40657	4.62879	4.07654	4.37063	3.84709	3.8488	4.21705	4.55969	4.11816	0.241787	0.358124	0.0690156	-0.0910243	-0.0903147	0.0631816	0.206001	3.02696	0.044955	0.0923695	0.3	0.022	0.278
ENSOCUG00000000404	ENSMUSG00000020196	MGI:1298375	Cabin1	2502	3065	3280	1892	2502	1434	1405	46.425	49.92	48.374	32.686	46.157	32.444	27.985	P	P	5.53682	5.64156	5.59615	5.59151	5.03062	5.52848	5.01988	4.80659	5.09639	0.833481	0.88831	0.864537	0.402294	0.609815	0.39782	0.308915	6.19994	0.00399473	0.0170424	0.8605	0.42975	0.43075
ENSOCUG00000001524	ENSMUSG00000040957	MGI:1927065	Cables1	442	475	587	284	242	237	210	8.201	7.736	8.657	4.906	4.464	5.362	4.183	P	A	3.03586	2.95167	3.11388	3.03381	2.29467	2.15848	2.4228	2.06448	2.23511	-0.475784	-0.519857	-0.434938	-0.738109	-0.794874	-0.684701	-0.834055	6.73427	0.00272756	0.0131995	-0.498	-0.763	0.265
ENSOCUG00000027560	ENSMUSG00000015488	MGI:1924317	Cacfd1	703	915	891	4	4	4	0	13.044	14.903	13.141	0.069	0.074	0.09	0	P	A	3.70534	3.89752	3.71595	3.77293	-3.85508	-3.76038	-3.46595	-5.64976	-4.18279	-0.125309	-0.0247033	-0.119755	-3.30145	-3.26198	-3.13925	-4.04952	15.7994	0.000303264	0.00402884	-0.075	-3.438	3.363
ENSOCUG00000015532	ENSMUSG00000028532	MGI:2444177	Cachd1	350	427	480	232	273	236	354	6.494	6.955	7.079	4.008	5.036	5.339	7.051	P	P	2.69917	2.79798	2.82356	2.77357	2.0029	2.33237	2.4167	2.81784	2.39245	-0.652043	-0.600315	-0.586925	-0.859723	-0.722392	-0.687243	-0.520038	0.955431	0.397868	0.46337	-0.626	-0.69725	0.07125
ENSOCUG00000011985	ENSMUSG00000034656	MGI:109482	Cacna1a	393	708	584	38	46	16	20	7.292	11.531	8.613	0.656	0.849	0.362	0.398	P	A	2.86634	3.52749	3.10649	3.16678	-0.607153	-0.236822	-1.46595	-1.32784	-0.909439	-0.564527	-0.218412	-0.438808	-1.94765	-1.79329	-2.30561	-2.24805	7.929	0.0141143	0.0411047	-0.3915	-2.07375	1.68225
ENSOCUG00000012674	ENSMUSG00000004113	MGI:88296	Cacna1b	113	1745	264	0	0	0	1	2.097	28.421	3.893	0	0	0	0.02	P	A	1.06814	4.8289	1.96106	2.61937	-5.85508	-5.76038	-5.46595	-5.64976	-5.68279	-1.50589	0.46288	-1.03845	-4.1351	-4.09563	-3.9729	-4.04952	3.59552	0.172203	0.240215	-0.5215	-4.0635	3.542
ENSOCUG00000011599	ENSMUSG00000051331	MGI:103013	Cacna1c	3231	3292	3783	773	605	515	640	59.951	53.618	55.792	13.354	11.161	11.652	12.748	P	P	5.90572	5.74464	5.80198	5.81745	3.73924	3.48041	3.54248	3.67216	3.60858	1.0266	0.942272	0.972292	-0.135978	-0.243866	-0.217992	-0.163938	23.9158	0.0035731	0.015691	0.9845	-0.1905	1.175
ENSOCUG00000013474	ENSMUSG00000015968	MGI:88293	Cacna1d	1259	1398	1350	58	16	30	34	23.361	22.77	19.91	1.002	0.295	0.679	0.677	P	A	4.54602	4.50904	4.31541	4.45682	0.00290094	-1.76038	-0.559054	-0.562301	-0.719709	0.314791	0.29543	0.194066	-1.69337	-2.42834	-1.9276	-1.92895	14.8243	0.000636842	0.00590272	0.305	-1.9945	2.2995
ENSOCUG00000002733	ENSMUSG00000020866	MGI:1201678	Cacna1g	449	290	363	127	146	140	214	8.331	4.723	5.354	2.194	2.693	3.167	4.263	P	A	3.05853	2.2398	2.42049	2.57294	1.1336	1.42944	1.66334	2.0917	1.57952	-0.463916	-0.892526	-0.797931	-1.22206	-1.09875	-1.00126	-0.822708	1.5524	0.317906	0.386244	-0.6785	-1.03625	0.35775
ENSOCUG00000007763	ENSMUSG00000040118	MGI:88295	Cacna2d1	4619	6244	4329	1230	1241	719	1583	85.706	101.698	63.844	21.25	22.894	16.267	31.531	P	P	6.42132	6.66814	5.99649	6.36198	4.40936	4.5169	4.0239	4.97868	4.48221	1.29652	1.42573	1.07412	0.143342	0.188167	-0.017326	0.380646	11.3936	0.000548177	0.00549137	1.3615	0.17375	1.18775
ENSOCUG00000012542	ENSMUSG00000021991	MGI:1338890	Cacna2d3	390	1038	395	6	0	6	4	7.236	16.906	5.825	0.104	0	0.136	0.08	P	A	2.85529	4.07948	2.54238	3.15905	-3.27012	-5.76038	-2.88098	-3.64976	-3.89031	-0.570314	0.0705549	-0.734125	-3.05763	-4.09563	-2.89543	-3.21587	7.33994	0.00962857	0.031313	-0.2495	-3.31625	3.06675
ENSOCUG00000012081	ENSMUSG00000020882	MGI:102522	Cacnb1	242	753	340	197	263	163	127	4.49	12.264	5.014	3.403	4.852	3.688	2.53	P	A	2.16682	3.61639	2.32606	2.70309	1.76697	2.27854	1.88278	1.33892	1.8168	-0.930729	-0.171872	-0.847368	-0.958063	-0.744833	-0.909791	-1.13648	0.99438	0.490513	0.549619	-0.5515	-0.93725	0.38575
ENSOCUG00000014849	ENSMUSG00000057914	MGI:894644	Cacnb2	870	646	504	566	606	536	739	16.143	10.522	7.433	9.778	11.18	12.127	14.72	P	P	4.01283	3.39528	2.89395	3.43402	3.28958	3.48279	3.60014	3.87967	3.56304	0.0356634	-0.287627	-0.550076	-0.323408	-0.242873	-0.193958	-0.0774466	0.489756	0.698349	0.74101	-0.126	-0.20925	0.08325
ENSOCUG00000007401	ENSMUSG00000003352	MGI:103307	Cacnb3	734	1705	984	983	1361	887	739	13.619	27.77	14.512	16.982	25.108	20.068	14.72	P	P	3.76759	4.79544	3.85918	4.14074	4.08597	4.65007	4.32685	3.87967	4.23564	-0.0927183	0.445366	-0.0447716	0.00854385	0.243673	0.108947	-0.0774466	0.377196	0.76439	0.799142	0.176	0.07125	0.10475
ENSOCUG00000015521	ENSMUSG00000033417	MGI:1926082	Cacul1	1534	2656	1914	591	426	390	709	28.463	43.259	28.228	10.21	7.859	8.824	14.122	P	P	4.83104	5.43493	4.81904	5.02834	3.35193	2.97433	3.14139	3.81988	3.32188	0.464	0.780138	0.457719	-0.297417	-0.454812	-0.385178	-0.102368	5.30877	0.0603114	0.113472	0.622	-0.30975	0.93175
ENSOCUG00000004358	ENSMUSG00000014226	MGI:1270839	Cacybp	758	1954	868	3950	3260	2650	4002	14.065	31.825	12.801	68.241	60.141	59.956	79.713	P	P	3.81401	4.9921	3.67822	4.16144	6.09256	5.91027	5.90583	6.31674	6.05635	-0.0684184	0.548317	-0.139507	0.844933	0.768953	0.767102	0.938378	-1.89852	0.302187	0.370899	0.24	0.82975	-0.58975
ENSOCUG00000016989	ENSMUSG00000013629	MGI:1916969	Cad	1384	1350	1562	1094	967	738	650	25.68	21.988	23.036	18.9	17.839	16.697	12.947	P	P	4.68259	4.45863	4.52585	4.55569	4.24032	4.15699	4.06153	3.69453	4.03834	0.386284	0.269043	0.30423	0.07288	0.0381469	-0.00164142	-0.154615	4.39667	0.0301991	0.0700512	0.3275	-0.0115	0.339
ENSOCUG00000000864	ENSMUSG00000032076	MGI:1889272	Cadm1	989	5062	1278	2871	1128	1235	1949	18.351	82.446	18.848	49.6	20.809	27.942	38.821	P	P	4.19778	6.36538	4.23634	4.93317	5.63226	4.37917	4.80435	5.27875	5.02363	0.132488	1.26723	0.152672	0.653071	0.130756	0.307981	0.505723	0.518273	0.690264	0.733231	0.6995	0.3995	0.3
ENSOCUG00000001739	ENSMUSG00000064115	MGI:2442722	Cadm2	135	700	90	8	0	2	7	2.505	11.401	1.327	0.138	0	0.045	0.139	P	A	1.32477	3.5111	0.408521	1.74813	-2.85508	-5.76038	-4.46595	-2.84241	-3.98095	-1.37154	-0.226994	-1.85121	-2.88463	-4.09563	-3.55608	-2.87935	3.96933	0.0856163	0.145237	-0.7995	-3.354	2.5545
ENSOCUG00000016385	ENSMUSG00000005338	MGI:2137858	Cadm3	649	3388	1135	578	899	1188	1071	12.042	55.181	16.739	9.986	16.585	26.878	21.332	P	P	3.59003	5.78611	4.06514	4.48043	3.31985	4.05179	4.74837	4.41498	4.13375	-0.185672	0.963981	0.0630504	-0.310792	-0.00570057	0.284649	0.145683	0.612018	0.642649	0.691029	0.389	0.0285	0.3605
ENSOCUG00000026547	ENSMUSG00000054793	MGI:2449088	Cadm4	182	726	128	12	38	24	12	3.377	11.825	1.888	0.207	0.701	0.543	0.239	P	A	1.75575	3.56371	0.916667	2.07871	-2.27012	-0.512456	-0.880983	-2.0648	-1.43209	-1.14593	-0.19945	-1.58519	-2.64081	-1.90818	-2.06179	-2.55523	3.19476	0.144702	0.2108	-0.6725	-2.2915	1.619
ENSOCUG00000002826	ENSMUSG00000054423	MGI:1350922	Cadps	214	4135	312	98	741	214	786	3.971	67.348	4.601	1.693	13.67	4.842	15.656	P	P	1.98942	6.07356	2.20207	3.42168	0.75963	3.77295	2.27552	3.96862	2.69418	-1.0236	1.11446	-0.912277	-1.37794	-0.12193	-0.746089	-0.0403683	0.55366	0.666631	0.712015	0.045	-0.5715	0.6165
ENSOCUG00000008943	ENSMUSG00000023055	MGI:1914738	Calcoco1	1628	1878	1918	1661	1974	1062	1212	30.208	30.587	28.287	28.696	36.417	24.028	24.141	P	P	4.91684	4.93487	4.82205	4.89126	4.84276	5.18652	4.58662	4.59341	4.80233	0.508918	0.518355	0.459296	0.32399	0.467279	0.217228	0.220057	3.49879	0.0388036	0.0836159	0.5135	0.307	0.2065
ENSOCUG00000016209	ENSMUSG00000006056	MGI:1343177	Calcoco2	0	0	0	7434	6145	5073	7166	0	0	0	128.43	113.364	114.776	142.734	A	P	-5.75204	-5.94011	-6.08333	-5.92516	7.00484	6.82481	6.84268	7.15719	6.95738	-5.07629	-5.17474	-5.24972	1.22519	1.15015	1.1576	1.28869	-106.896	0.000116225	0.00254801	-5.1255	1.2055	-6.331
ENSOCUG00000013954	ENSMUSG00000059588	MGI:1926944	Calcrl	2205	2465	2026	1379	936	1885	1402	40.914	40.148	29.88	23.824	17.267	42.648	27.925	P	P	5.35452	5.32726	4.90109	5.19429	4.57433	4.10998	5.4144	4.80351	4.72555	0.738044	0.723773	0.500669	0.212102	0.0185532	0.562265	0.30763	4.02894	0.0270934	0.0652159	0.731	0.27525	0.45575
ENSOCUG00000008127	ENSMUSG00000029761	MGI:88250	Cald1	14485	13976	14402	36237	51515	38572	45385	268.77	227.631	212.401	626.033	950.354	872.687	903.991	P	P	8.07023	7.83055	7.73065	7.87714	9.2901	9.89232	9.76932	9.82016	9.69298	2.15973	2.03426	1.98196	2.17774	2.42876	2.37749	2.39868	-2.92967	0.069428	0.124968	2.097	2.34575	-0.24875
ENSOCUG00000006336	ENSMUSG00000033033	MGI:1919941	Calhm2	566	724	657	815	738	610	622	10.502	11.792	9.689	14.08	13.615	13.801	12.389	P	P	3.39262	3.55973	3.27642	3.40959	3.81558	3.76709	3.78672	3.63101	3.7501	-0.289021	-0.201534	-0.349851	-0.104161	-0.12437	-0.116189	-0.181093	-2.44464	0.195414	0.264808	-0.2455	-0.13125	-0.11425
ENSOCUG00000002660	ENSMUSG00000049872	MGI:2143897	Calhm5	1018	1232	1136	580	724	536	860	18.889	20.066	16.754	10.02	13.356	12.127	17.13	P	P	4.23948	4.32668	4.06641	4.21086	3.32483	3.73946	3.60014	4.09843	3.69072	0.154316	0.199963	0.0637155	-0.308715	-0.135887	-0.193958	0.0137382	4.69332	0.0120643	0.0368906	0.177	-0.15625	0.33325
ENSOCUG00000002107	ENSMUSG00000036438	MGI:103250	Calm2	6039	14133	6239	18508	19087	15908	21718	112.054	230.188	92.013	319.746	352.119	359.917	432.585	P	P	6.80805	7.84667	6.52377	7.0595	8.32078	8.45992	8.49152	8.75684	8.50727	1.49897	2.04269	1.35015	1.7737	1.8317	1.84487	1.95546	-0.29314	0.817054	0.846828	1.771	1.8515	-0.0805
ENSOCUG00000008167	ENSMUSG00000029767	MGI:1097158	Calu	15717	16275	15712	25915	23200	22930	28159	291.63	265.075	231.721	447.71	427.996	518.789	560.879	P	P	8.188	8.05026	7.85625	8.0315	8.80642	8.74145	9.019	9.13154	8.92461	2.22138	2.14927	2.04771	1.97613	1.94905	2.06474	2.11165	3.0463	0.0518905	0.101578	2.185	2.0255	0.1595
ENSOCUG00000026164	ENSMUSG00000030272	MGI:1098535	Camk1	2221	2560	2791	3707	3324	2148	2118	41.211	41.695	41.162	64.042	61.321	48.598	42.187	P	P	5.36495	5.38182	5.36323	5.37	6.00096	5.93832	5.60283	5.39872	5.73521	0.743505	0.752334	0.742606	0.806752	0.780644	0.640806	0.555729	0.870981	0.447334	0.509034	0.748	0.69625	0.05175
ENSOCUG00000011626	ENSMUSG00000039145	MGI:2442190	Camk1d	842	1717	1112	176	171	70	229	15.623	27.965	16.4	3.041	3.155	1.584	4.561	P	A	3.96563	4.80556	4.03561	4.26894	1.60435	1.65747	0.663338	2.18944	1.52865	0.0109566	0.450663	0.0475884	-1.02585	-1.00371	-1.41808	-0.781969	5.02019	0.0474841	0.0957715	0.231	-1.0575	1.2885
ENSOCUG00000023650	ENSMUSG00000053819	MGI:1341265	Camk2d	7240	8722	6868	3152	3386	3110	3794	134.339	142.058	101.29	54.454	62.465	70.363	75.57	P	P	7.06973	7.15033	6.66234	6.9608	5.76697	5.96498	6.13675	6.23974	6.02711	1.63596	1.67816	1.42269	0.709222	0.791758	0.863355	0.906283	17.4994	7.11783e-05	0.00213177	1.657	0.8175	0.8395
ENSOCUG00000012578	ENSMUSG00000021820	MGI:88259	Camk2g	2588	3182	2796	3954	5336	2449	3448	48.021	51.826	41.236	68.31	98.439	55.408	68.678	P	P	5.58558	5.69561	5.36582	5.549	6.09402	6.62116	5.79203	6.10178	6.15225	0.859004	0.916604	0.743957	0.845542	1.06527	0.719668	0.848778	0.232972	0.827907	0.855999	0.888	0.87	0.018
ENSOCUG00000026741	ENSMUSG00000038128	MGI:88258	Camk4	260	1142	249	55	16	30	26	4.824	18.6	3.672	0.95	0.295	0.679	0.518	P	A	2.27033	4.21724	1.87667	2.78808	-0.0737203	-1.76038	-0.559054	-0.949324	-0.835621	-0.876544	0.142671	-1.08262	-1.7253	-2.42834	-1.9276	-2.09027	3.1547	0.164925	0.232462	-0.367	-2.04275	1.67575
ENSOCUG00000012043	ENSMUSG00000020785	MGI:1891766	Camkk1	339	585	453	1315	2424	964	1017	6.29	9.528	6.681	22.718	44.718	21.81	20.257	P	P	2.6531	3.25218	2.74003	2.88177	4.50577	5.48279	4.44694	4.34034	4.69396	-0.676161	-0.362539	-0.63065	0.183525	0.590769	0.159007	0.114572	-4.08047	0.0518445	0.101528	-0.5195	0.26225	-0.78175
ENSOCUG00000025635	ENSMUSG00000029471	MGI:2444812	Camkk2	1836	2703	2499	1014	1024	659	772	34.067	44.024	36.855	17.518	18.891	14.91	15.377	P	P	5.09031	5.46023	5.2038	5.25145	4.13076	4.23962	3.89819	3.94269	4.05282	0.599728	0.793386	0.659143	0.0272151	0.0725879	-0.069726	-0.0511758	6.87034	0.060644	0.113899	0.6965	-0.00525	0.70175
ENSOCUG00000005476	ENSMUSG00000071037	MGI:1920832	Camkmt	92	114	112	313	356	282	354	1.707	1.857	1.652	5.407	6.568	6.38	7.051	A	P	0.77152	0.892779	0.724022	0.796107	2.43494	2.71535	2.67361	2.81784	2.66043	-1.66118	-1.5977	-1.68604	-0.67964	-0.562759	-0.580159	-0.520038	-22.5698	0.000118906	0.00257888	-1.6295	-0.58575	-1.04375
ENSOCUG00000008284	ENSMUSG00000021501	MGI:104728	Caml	481	972	584	958	898	762	834	8.925	15.831	8.613	16.55	16.566	17.24	16.612	P	P	3.15785	3.9847	3.10649	3.41635	4.0488	4.05019	4.1077	4.05414	4.06521	-0.411921	0.0209381	-0.438808	-0.00694763	-0.00636985	0.0176033	-0.00472253	-0.902654	0.532356	0.588636	-0.1955	-6.50521e-19	-0.1955
ENSOCUG00000002359	ENSMUSG00000026933	MGI:3036242	Camsap1	1493	2514	1723	275	279	171	146	27.703	40.946	25.411	4.751	5.147	3.869	2.908	P	A	4.79196	5.35566	4.66737	4.93833	2.24821	2.36374	1.95191	1.54006	2.02598	0.443539	0.738639	0.37832	-0.757474	-0.709318	-0.880978	-1.05264	8.66929	0.0256857	0.0626334	0.5915	-0.85	1.4415
ENSOCUG00000007754	ENSMUSG00000041570	MGI:1922434	Camsap2	2760	4673	3231	2351	1685	1215	2192	51.212	76.11	47.651	40.616	31.085	27.489	43.661	P	P	5.67841	6.25002	5.57443	5.83429	5.34398	4.95815	4.7808	5.44827	5.1328	0.907602	1.20684	0.853169	0.53291	0.372088	0.298163	0.57638	3.75204	0.107423	0.170014	1.0575	0.44475	0.61275
ENSOCUG00000013140	ENSMUSG00000014592	MGI:2140230	Camta1	447	1375	538	53	32	22	28	8.294	22.395	7.934	0.916	0.59	0.498	0.558	P	A	3.05209	4.4851	2.98813	3.50844	-0.12716	-0.760384	-1.00651	-0.842409	-0.684116	-0.467288	0.282901	-0.500771	-1.74758	-2.01152	-2.11411	-2.04571	4.92337	0.112021	0.175323	-0.092	-1.98	1.888
ENSOCUG00000001109	ENSMUSG00000040712	MGI:2135957	Camta2	1224	1795	1880	3359	3147	1767	2245	22.711	29.236	27.726	58.03	58.056	39.978	44.717	P	P	4.50535	4.86966	4.79318	4.72273	5.85874	5.85938	5.32114	5.48274	5.6305	0.293498	0.484216	0.444182	0.747472	0.747739	0.523391	0.590747	-2.37457	0.157972	0.224977	0.3885	0.65225	-0.26375
ENSOCUG00000005019	ENSMUSG00000020114	MGI:1261820	Cand1	3000	4867	3200	4747	3251	2824	4554	55.665	79.27	47.194	82.01	59.975	63.893	90.708	P	P	5.7987	6.30871	5.56052	5.88931	6.35772	5.90628	5.99758	6.50316	6.19118	0.970576	1.23756	0.845888	0.955459	0.767291	0.805345	1.01608	1.49695	0.31889	0.387101	1.1045	0.88575	0.21875
ENSOCUG00000009266	ENSMUSG00000030319	MGI:1914338	Cand2	369	331	411	131	282	172	128	6.847	5.391	6.061	2.263	5.202	3.891	2.55	P	A	2.77543	2.43058	2.59966	2.60189	1.17834	2.37917	1.96032	1.35024	1.71702	-0.612118	-0.792653	-0.704135	-1.20342	-0.702887	-0.877472	-1.13177	1.88238	0.139352	0.205313	-0.7025	-0.97875	0.27625
ENSOCUG00000022227	ENSMUSG00000025575	MGI:1923275	Cant1	1424	1753	1932	580	765	587	569	26.422	28.552	28.493	10.02	14.113	13.281	11.333	P	P	4.72369	4.8355	4.83255	4.79725	3.32483	3.81893	3.73127	3.50252	3.59439	0.407802	0.466334	0.464789	-0.308715	-0.102762	-0.139301	-0.234649	11.5215	0.000331727	0.00421791	0.437	-0.1965	0.6335
ENSOCUG00000015091	ENSMUSG00000020368	MGI:88261	Canx	15385	21802	15409	17425	10431	9633	14856	285.47	355.095	227.253	301.036	192.432	217.946	295.906	P	P	8.15719	8.47206	7.82815	8.15247	8.23379	7.58821	7.76782	8.20899	7.9497	2.20526	2.37009	2.033	1.73745	1.46835	1.54322	1.72711	6.28552	0.0150696	0.0429044	2.2875	1.61875	0.66875
ENSOCUG00000012790	ENSMUSG00000028656	MGI:88262	Cap1	7567	9952	9026	23936	12733	10383	18050	140.406	162.091	133.116	413.52	234.9	234.914	359.525	P	P	7.13346	7.34066	7.05654	7.17689	8.69181	7.8759	7.87599	8.48995	8.23341	1.66933	1.7778	1.62906	1.92836	1.58827	1.58831	1.84422	-0.130726	0.902329	0.920016	1.7235	1.737	-0.0135
ENSOCUG00000001833	ENSMUSG00000021373	MGI:1914502	Cap2	915	722	752	737	1079	758	982	16.978	11.759	11.091	12.732	19.906	17.15	19.56	P	P	4.08559	3.55574	3.47126	3.7042	3.67044	4.3151	4.10011	4.28982	4.09387	0.0737517	-0.203623	-0.247852	-0.164657	0.104049	0.0144383	0.0935121	-0.503913	0.68126	0.724934	-0.065	0.01175	-0.07675
ENSOCUG00000002341	ENSMUSG00000056737	MGI:1098259	Capg	3820	4976	5484	34446	21902	16368	16570	70.88	81.045	80.878	595.092	404.05	370.324	330.046	P	P	6.14731	6.34066	6.33768	6.27522	9.21697	8.65839	8.53265	8.36652	8.69363	1.15308	1.25429	1.25273	2.14726	1.91443	1.86201	1.79277	-7.89485	0.00147708	0.00901582	1.2035	1.929	-0.7255
ENSOCUG00000003122	ENSMUSG00000024942	MGI:88263	Capn1	1306	2110	1497	6154	4839	4240	3973	24.233	34.366	22.078	106.317	89.27	95.93	79.135	P	P	4.5989	5.10292	4.46453	4.72211	6.73223	6.48011	6.5839	6.30625	6.52562	0.342472	0.606328	0.272128	1.11156	1.00647	1.04974	0.934005	-4.01935	0.127519	0.192277	0.474	1.0255	-0.5515
ENSOCUG00000021321	ENSMUSG00000026270	MGI:1344392	Capn10	255	538	356	689	818	590	383	4.732	8.763	5.25	11.903	15.091	13.349	7.629	P	P	2.24231	3.13135	2.3924	2.58869	3.57328	3.91557	3.73863	2.93144	3.53973	-0.89121	-0.425794	-0.812637	-0.205155	-0.0624801	-0.136235	-0.472689	-1.76398	0.281075	0.350429	-0.6585	-0.219	-0.4395
ENSOCUG00000003160	ENSMUSG00000037326	MGI:1355075	Capn15	455	611	785	1421	1610	1009	868	8.443	9.952	11.577	24.549	29.701	22.829	17.289	P	P	3.07768	3.31492	3.53322	3.3086	4.61761	4.89246	4.51277	4.11179	4.53366	-0.453891	-0.329696	-0.215416	0.230144	0.344708	0.186442	0.0193063	-6.4012	0.00600691	0.0225595	-0.392	0.195	-0.587
ENSOCUG00000004612	ENSMUSG00000026509	MGI:88264	Capn2	6063	6216	6139	23102	19532	14568	19658	112.499	101.242	90.538	399.112	360.328	329.599	391.553	P	P	6.81377	6.66166	6.50046	6.65863	8.64065	8.49317	8.36457	8.61307	8.52786	1.50197	1.42234	1.33795	1.90703	1.84556	1.79196	1.89554	-8.31543	0.0156277	0.0440101	1.462	1.86025	-0.39825
ENSOCUG00000024481	ENSMUSG00000079110	MGI:107437	Capn3	79	102	90	331	283	209	398	1.466	1.661	1.327	5.718	5.221	4.729	7.927	A	P	0.551738	0.732314	0.408521	0.564191	2.51561	2.38427	2.24141	2.98686	2.53204	-1.77623	-1.6817	-1.85121	-0.646016	-0.700758	-0.760306	-0.449587	-13.2835	0.000225311	0.00345741	-1.729	-0.63925	-1.08975
ENSOCUG00000025830	ENSMUSG00000035547	MGI:1100859	Capn5	970	2983	1292	1335	1988	1301	1042	17.998	48.585	19.054	23.064	36.675	29.435	20.755	P	P	4.1698	5.60244	4.25206	4.67476	4.52754	5.19672	4.87946	4.37538	4.74477	0.117838	0.867829	0.1609	0.192602	0.471529	0.339289	0.129176	0.547976	0.67501	0.719542	0.493	0.28325	0.20975
ENSOCUG00000007287	ENSMUSG00000021893	MGI:1338030	Capn7	1576	2320	1821	1232	894	782	1164	29.243	37.786	26.856	21.284	16.493	17.693	23.185	P	P	4.87001	5.2398	4.74718	4.95233	4.41171	4.04375	4.14508	4.53511	4.28391	0.484401	0.677986	0.4201	0.144319	-0.00905443	0.0331831	0.195757	4.5348	0.0743267	0.131283	0.581	0.091	0.49
ENSOCUG00000013093	ENSMUSG00000001794	MGI:88266	Capns1	3333	5460	3628	23622	19946	15033	23017	61.844	88.928	53.506	408.096	367.966	340.12	458.459	P	P	5.95056	6.47457	5.74163	6.05559	8.67276	8.52343	8.4099	8.84065	8.61169	1.05007	1.3244	0.940695	1.92042	1.85817	1.81085	1.9904	-4.97046	0.100587	0.162473	1.187	1.89475	-0.70775
ENSOCUG00000024887	ENSMUSG00000027184	MGI:1858234	Caprin1	6233	9230	7417	14115	8608	8850	14444	115.654	150.331	109.386	243.852	158.801	200.23	287.7	P	P	6.85367	7.232	6.77329	6.95299	7.92986	7.31108	7.64552	8.16842	7.76372	1.52285	1.72091	1.48077	1.61076	1.35284	1.49224	1.7102	0.64175	0.579212	0.632323	1.622	1.5415	0.0805
ENSOCUG00000017805	ENSMUSG00000030309	MGI:2448541	Caprin2	290	383	275	110	234	145	102	5.381	6.238	4.056	1.9	4.317	3.281	2.032	P	A	2.42787	2.64109	2.01996	2.36297	0.92628	2.10998	1.71396	1.02266	1.44322	-0.794071	-0.682448	-1.00761	-1.30848	-0.81509	-0.980158	-1.26831	2.71725	0.0544734	0.105299	-0.738	-1.09275	0.35475
ENSOCUG00000000270	ENSMUSG00000070372	MGI:106227	Capza1	1065	2031	1594	5255	2815	3380	5841	19.761	33.079	23.508	90.786	51.931	76.472	116.343	P	P	4.3046	5.04786	4.5551	4.63585	6.50439	5.69854	6.25686	6.86224	6.33051	0.188404	0.577508	0.319546	1.0166	0.680697	0.913419	1.16575	-2.5506	0.157346	0.224283	0.383	0.94425	-0.56125
ENSOCUG00000003591	ENSMUSG00000015733	MGI:106222	Capza2	4166	6728	4934	6784	5322	5292	7117	77.3	109.581	72.767	117.201	98.181	119.731	141.758	P	P	6.2724	6.77585	6.18521	6.41115	6.87284	6.61737	6.90365	7.14729	6.88529	1.21856	1.48212	1.17291	1.17017	1.06369	1.18302	1.28457	1.25855	0.39464	0.46005	1.3505	1.1755	0.175
ENSOCUG00000014711	ENSMUSG00000028745	MGI:104652	Capzb	3048	4328	3696	9786	7881	5582	8080	56.556	70.491	54.509	169.064	145.39	126.292	160.94	P	P	5.8216	6.13937	5.76842	5.9098	7.40142	7.18378	6.98062	7.33038	7.22405	0.982565	1.14892	0.95472	1.3905	1.29978	1.2151	1.36088	-2.73555	0.155346	0.222117	1.066	1.3165	-0.2505
ENSOCUG00000007328	ENSMUSG00000027555	MGI:1931322	Car13	367	549	443	791	398	601	814	6.81	8.942	6.533	13.665	7.342	13.598	16.213	P	P	2.76759	3.16055	2.70783	2.87866	3.77245	2.87624	3.76528	4.01912	3.60827	-0.616222	-0.410508	-0.647509	-0.122135	-0.495696	-0.125127	-0.019319	-2.2037	0.112857	0.176092	-0.5135	-0.1905	-0.323
ENSOCUG00000011742	ENSMUSG00000027562	MGI:88269	Car2	104	108	295	2744	1878	1648	4000	1.93	1.759	4.351	47.406	34.646	37.286	79.673	A	P	0.948397	0.814776	2.12124	1.2948	5.56698	5.1146	5.22056	6.31602	5.55454	-1.56858	-1.63853	-0.954592	0.625864	0.437299	0.481464	0.938078	-18.7631	0.00012162	0.00261113	-1.604	0.6205	-2.2245
ENSOCUG00000011736	ENSMUSG00000027559	MGI:88270	Car3	6427	3133	4564	80	54	58	70	119.253	51.028	67.31	1.382	0.996	1.312	1.394	P	A	6.89789	5.67322	6.07275	6.21462	0.466848	-0.00549618	0.392036	0.47952	0.333227	1.546	0.904883	1.11404	-1.49998	-1.69687	-1.53117	-1.4947	8.5831	0.0676673	0.122928	1.2255	-1.55575	2.78125
ENSOCUG00000005571	ENSMUSG00000031373	MGI:1926249	Car5b	698	716	750	2510	2389	3027	3035	12.951	11.662	11.061	43.363	44.073	68.486	60.452	P	P	3.69504	3.5437	3.46741	3.56872	5.43839	5.46181	6.09773	5.91772	5.72891	-0.1307	-0.209925	-0.249864	0.572263	0.582023	0.847089	0.772056	-10.8792	0.000405285	0.00462158	-0.1705	0.69325	-0.86375
ENSOCUG00000026525	ENSMUSG00000041261	MGI:88253	Car8	451	234	553	21	25	25	21	8.368	3.811	8.156	0.363	0.461	0.566	0.418	P	A	3.06494	1.93025	3.0278	2.67433	-1.46276	-1.11653	-0.822089	-1.25745	-1.16471	-0.46056	-1.05457	-0.480002	-2.30429	-2.15997	-2.03724	-2.21871	4.70473	0.120831	0.184645	-0.758	-2.18	1.422
ENSOCUG00000010187	ENSMUSG00000028463	MGI:2447188	Car9	193	155	180	832	709	958	725	3.581	2.525	2.655	14.374	13.08	21.675	14.441	A	P	1.84041	1.33601	1.40852	1.52832	3.84536	3.70926	4.43794	3.85207	3.96116	-1.1016	-1.36566	-1.3277	-0.0917467	-0.148477	0.155252	-0.0889481	-8.02889	0.029867	0.0696015	-1.234	-0.0435	-1.1905
ENSOCUG00000003517	ENSMUSG00000033170	MGI:2146012	Card10	326	491	547	231	348	334	170	6.049	7.997	8.067	3.991	6.42	7.557	3.386	P	P	2.59669	2.99947	3.01206	2.86941	1.99667	2.68256	2.91776	1.75963	2.33915	-0.705693	-0.494835	-0.488241	-0.862321	-0.576427	-0.47839	-0.961125	0.762428	0.497408	0.555997	-0.6005	-0.71925	0.11875
ENSOCUG00000010338	ENSMUSG00000037960	MGI:1915730	Card19	458	600	639	1494	1919	1237	1142	8.498	9.772	9.424	25.81	35.402	27.987	22.747	P	P	3.08716	3.28871	3.23634	3.20407	4.68988	5.14576	4.80668	4.50758	4.78748	-0.448927	-0.343417	-0.370832	0.260269	0.450286	0.308954	0.184282	-9.03634	0.00230792	0.0118778	-0.396	0.30075	-0.69675
ENSOCUG00000005335	ENSMUSG00000026017	MGI:2182269	Carf	472	551	517	268	260	175	324	8.758	8.974	7.625	4.63	4.797	3.959	6.454	P	A	3.1306	3.1658	2.93069	3.0757	2.21101	2.26198	1.98527	2.69009	2.28709	-0.426187	-0.407761	-0.530842	-0.772979	-0.751731	-0.867073	-0.573289	5.22481	0.0122979	0.03737	-0.417	-0.74125	0.32425
ENSOCUG00000003368	ENSMUSG00000032185	MGI:1913208	Carm1	736	988	975	1161	1011	748	877	13.657	16.092	14.379	20.058	18.651	16.923	17.468	P	P	3.77152	4.00826	3.84593	3.87523	4.32607	4.22118	4.08095	4.12667	4.18872	-0.0906631	0.0332691	-0.0517112	0.108625	0.0649048	0.00645219	0.0255093	-1.21894	0.40142	0.466668	-0.029	0.0515	-0.0805
ENSOCUG00000014216	ENSMUSG00000021338	MGI:1915982	Carmil1	1308	1581	1573	1113	1199	1112	1112	24.27	25.75	23.199	19.228	22.119	25.159	22.149	P	P	4.6011	4.68651	4.53597	4.60786	4.26516	4.46723	4.653	4.46918	4.46364	0.343628	0.388338	0.30953	0.0832342	0.167463	0.244893	0.168274	5.04013	0.00761381	0.0264166	0.366	0.16575	0.20025
ENSOCUG00000017017	ENSMUSG00000024726	MGI:1914633	Carnmt1	143	179	177	583	380	445	566	2.653	2.915	2.61	10.072	7.01	10.068	11.274	A	P	1.40783	1.5437	1.38427	1.44527	3.33227	2.80947	3.33172	3.49489	3.24209	-1.32806	-1.25693	-1.3404	-0.305613	-0.523527	-0.305844	-0.237828	-13.2405	0.00018815	0.00315541	-1.2925	-0.3435	-0.949
ENSOCUG00000009033	ENSMUSG00000010755	MGI:1351477	Cars	733	1039	1018	1228	1251	940	726	13.601	16.922	15.014	21.215	23.079	21.267	14.461	P	P	3.76563	4.08087	3.90819	3.91823	4.40701	4.52848	4.41057	3.85406	4.30003	-0.0937479	0.0712822	-0.0191161	0.142363	0.192994	0.143846	-0.0881193	-1.05228	0.392312	0.457831	-0.0115	0.09775	-0.10925
ENSOCUG00000023254	ENSMUSG00000056228	MGI:1919191	Cars2	532	657	642	275	379	256	177	9.871	10.701	9.468	4.751	6.992	5.792	3.526	P	P	3.30324	3.41964	3.2431	3.32199	2.24821	2.80567	2.53405	1.81784	2.35144	-0.335809	-0.274875	-0.367295	-0.757474	-0.525111	-0.638327	-0.936859	4.38567	0.014843	0.0424458	-0.3055	-0.71425	0.40875
ENSOCUG00000002954	ENSMUSG00000078676	MGI:2179723	Casc3	906	1383	1262	3432	2714	1828	2522	16.811	22.525	18.612	59.292	50.068	41.358	50.234	P	P	4.07132	4.49347	4.21816	4.26099	5.88975	5.64582	5.37011	5.65059	5.63907	0.0662861	0.287283	0.143157	0.760401	0.658724	0.5438	0.660712	-4.02959	0.105541	0.167991	0.1765	0.656	-0.4795
ENSOCUG00000005362	ENSMUSG00000060227	MGI:2443129	Casc4	1248	1681	1197	6691	4181	4760	7406	23.157	27.379	17.653	115.594	77.132	107.695	147.515	P	P	4.53336	4.77499	4.14187	4.48341	6.85293	6.26925	6.7508	7.20472	6.76942	0.308163	0.434659	0.103219	1.16187	0.918582	1.1193	1.3085	-7.3735	0.00255606	0.0127176	0.3715	1.12725	-0.75575
ENSOCUG00000012292	ENSMUSG00000015189	MGI:2384865	Casd1	1134	1750	1123	1134	1021	1117	1433	21.041	28.503	16.562	19.591	18.836	25.272	28.543	P	P	4.39516	4.83303	4.04981	4.426	4.29212	4.23538	4.65947	4.83506	4.50551	0.235816	0.465041	0.0550228	0.0944746	0.0708236	0.247591	0.320781	1.29017	0.35296	0.420277	0.3505	0.1835	0.167
ENSOCUG00000004864	ENSMUSG00000031012	MGI:1309489	Cask	1647	2245	1818	1197	751	810	1090	30.56	36.565	26.812	20.679	13.855	18.326	21.711	P	P	4.93358	5.19239	4.7448	4.95692	4.37013	3.79229	4.19583	4.44035	4.19965	0.517681	0.653167	0.418855	0.126988	-0.113869	0.0543382	0.156258	5.84359	0.0136081	0.0401597	0.5855	0.05575	0.52975
ENSOCUG00000011862	ENSMUSG00000034471	MGI:2157062	Caskin2	1086	1323	1398	289	242	169	189	20.151	21.548	20.618	4.993	4.464	3.824	3.765	P	A	4.33277	4.42949	4.36582	4.37602	2.31985	2.15848	1.93493	1.91248	2.08143	0.203152	0.253785	0.220453	-0.727614	-0.794874	-0.888053	-0.897413	22.15	2.60251e-05	0.00137579	0.2285	-0.827	1.0555
ENSOCUG00000001103	ENSMUSG00000025888	MGI:96544	Casp1	359	695	565	964	296	352	554	6.661	11.32	8.333	16.654	5.461	7.964	11.035	P	P	2.7358	3.50076	3.05877	3.09844	4.05781	2.44907	2.99349	3.46398	3.24109	-0.632868	-0.232408	-0.463788	-0.00319312	-0.67375	-0.446826	-0.250714	-0.360611	0.751577	0.787347	-0.4325	-0.34375	-0.08875
ENSOCUG00000002158	ENSMUSG00000029863	MGI:97295	Casp2	641	714	647	827	522	364	443	11.894	11.629	9.542	14.287	9.63	8.235	8.824	P	P	3.57214	3.53967	3.25429	3.45537	3.83666	3.26752	3.04185	3.1414	3.32186	-0.19504	-0.212038	-0.361435	-0.0953714	-0.332602	-0.426667	-0.385172	1.42598	0.246943	0.317098	-0.2035	-0.31	0.1065
ENSOCUG00000006627	ENSMUSG00000031628	MGI:107739	Casp3	441	566	555	1152	990	828	1134	8.183	9.219	8.185	19.902	18.264	18.733	22.587	P	P	3.03259	3.20455	3.03301	3.09005	4.31484	4.1909	4.22754	4.49744	4.30768	-0.477494	-0.387476	-0.477275	0.103945	0.0522824	0.0675551	0.180055	-10.0074	0.012407	0.0376075	-0.432	0.101	-0.533
ENSOCUG00000007503	ENSMUSG00000033538	MGI:107700	Casp4	1121	1495	1325	548	461	494	606	20.8	24.349	19.541	9.467	8.505	11.177	12.07	P	P	4.37853	4.60582	4.28844	4.42426	3.24295	3.08824	3.48242	3.59341	3.35176	0.227108	0.346096	0.179949	-0.342843	-0.407331	-0.243027	-0.196764	7.66752	0.0101203	0.0323761	0.2865	-0.2975	0.584
ENSOCUG00000011041	ENSMUSG00000025076	MGI:109383	Casp7	328	404	399	857	637	601	556	6.086	6.58	5.884	14.806	11.751	13.598	11.075	P	P	2.60551	2.7181	2.55691	2.62684	3.88807	3.55477	3.76528	3.46918	3.66932	-0.701074	-0.642133	-0.726515	-0.0739435	-0.212872	-0.125127	-0.248547	-10.1788	0.000686898	0.00611295	-0.6715	-0.16525	-0.50625
ENSOCUG00000007128	ENSMUSG00000026029	MGI:1261423	Casp8	875	1093	973	1927	943	1099	1212	16.236	17.802	14.35	33.291	17.397	24.865	24.141	P	P	4.0211	4.15397	3.84296	4.00601	5.05706	4.12073	4.63603	4.59341	4.60181	0.0399916	0.109549	-0.0532621	0.413316	0.0230337	0.237822	0.220057	-1.70497	0.166382	0.234075	0.075	0.2235	-0.1485
ENSOCUG00000001742	ENSMUSG00000028282	MGI:1349399	Casp8ap2	972	1331	1228	738	560	584	632	18.036	21.678	18.111	12.75	10.331	13.213	12.588	P	P	4.17277	4.43818	4.17876	4.26324	3.6724	3.3689	3.72388	3.65402	3.6048	0.119393	0.258338	0.12253	-0.163841	-0.290346	-0.142382	-0.171502	4.93799	0.0677459	0.122941	0.1885	-0.192	0.3805
ENSOCUG00000016047	ENSMUSG00000028914	MGI:1277950	Casp9	545	861	741	542	429	390	311	10.113	14.023	10.928	9.364	7.914	8.824	6.195	P	P	3.33807	3.80976	3.45	3.53261	3.22707	2.98445	3.14139	2.63101	2.99598	-0.317576	-0.0706453	-0.258981	-0.349463	-0.450592	-0.385178	-0.597915	1.85862	0.253366	0.323467	-0.1945	-0.44575	0.25125
ENSOCUG00000007802	ENSMUSG00000021585	MGI:1098236	Cast	5654	6370	6466	15486	11701	8920	12335	104.91	103.75	95.361	267.537	215.861	201.814	245.692	P	P	6.71301	6.69697	6.57533	6.66177	8.0636	7.75396	7.65688	7.94071	7.85379	1.44922	1.44082	1.37714	1.6665	1.53744	1.49698	1.61528	-3.48709	0.0385341	0.083312	1.445	1.579	-0.134
ENSOCUG00000021679	ENSMUSG00000020424	MGI:1919212	Castor1	200	190	233	706	866	704	445	3.711	3.095	3.436	12.197	15.976	15.928	8.864	A	P	1.89181	1.62974	1.78085	1.76747	3.60844	3.99784	3.99349	3.1479	3.68692	-1.0747	-1.21189	-1.13278	-0.190498	-0.0281898	-0.0300042	-0.382464	-9.10294	0.00134897	0.00861074	-1.1435	-0.1575	-0.986
ENSOCUG00000011366	ENSMUSG00000015944	MGI:1933384	Castor2	909	1432	1218	161	142	124	140	16.867	23.323	17.963	2.781	2.62	2.805	2.789	P	A	4.07609	4.5437	4.16697	4.26225	1.47584	1.38936	1.48825	1.47952	1.45824	0.0687828	0.313579	0.116355	-1.07941	-1.11546	-1.07424	-1.07788	10.401	0.0594381	0.112219	0.1915	-1.0865	1.278
ENSOCUG00000026310	ENSMUSG00000028977	MGI:1196251	Casz1	224	632	284	158	216	90	135	4.156	10.294	4.188	2.73	3.985	2.036	2.689	P	A	2.05531	3.36367	2.06641	2.49513	1.4487	1.9945	1.02591	1.42705	1.47404	-0.989104	-0.304174	-0.983292	-1.09073	-0.863223	-1.26695	-1.09975	1.23084	0.417282	0.481026	-0.6465	-1.08025	0.43375
ENSOCUG00000014198	ENSMUSG00000027187	MGI:88271	Cat	2915	2771	3304	18718	10330	9169	18704	54.088	45.132	48.728	323.374	190.569	207.448	372.551	P	P	5.75724	5.49608	5.60667	5.61999	8.33706	7.57417	7.6966	8.5413	8.03728	0.948868	0.812151	0.870043	1.78049	1.4625	1.51353	1.86562	-6.45303	0.00328592	0.01488	0.8805	1.65575	-0.77525
ENSOCUG00000014520	ENSMUSG00000007655	MGI:102709	Cav1	10602	7501	8503	19311	26407	22618	30149	196.721	122.171	125.403	333.618	487.159	511.73	600.516	P	P	7.62001	6.93276	6.97042	7.1744	8.38206	8.92825	8.99924	9.23006	8.8849	1.92404	1.56426	1.58398	1.79925	2.02691	2.0565	2.15271	-1.35903	0.356094	0.423438	1.744	2.009	-0.265
ENSOCUG00000014515	ENSMUSG00000000058	MGI:107571	Cav2	2678	2231	2253	1701	2341	3084	2442	49.69	36.337	33.227	29.387	43.187	69.775	48.64	P	P	5.6349	5.18336	5.0543	5.29085	4.87709	5.43253	6.12464	5.60408	5.50958	0.884823	0.648443	0.580877	0.3383	0.569818	0.858307	0.641327	1.03123	0.385771	0.451769	0.7665	0.60175	0.16475
ENSOCUG00000026764	ENSMUSG00000004044	MGI:1277968	Cavin1	11137	9249	12758	4526	5543	3766	3458	206.648	150.641	188.156	78.192	102.258	85.205	68.877	P	P	7.69103	7.23497	7.55578	7.49393	6.28894	6.67607	6.41287	6.10596	6.37096	1.96122	1.72247	1.89041	0.92679	1.08815	0.978448	0.850519	6.80271	0.0513879	0.100854	1.8415	0.961	0.8805
ENSOCUG00000017723	ENSMUSG00000045954	MGI:99513	Cavin2	2472	1827	2743	695	771	559	722	45.868	29.757	40.454	12.007	14.223	12.647	14.381	P	P	5.51942	4.89515	5.33821	5.25093	3.58579	3.8302	3.66076	3.84609	3.73071	0.82437	0.497562	0.729504	-0.199941	-0.0980641	-0.168692	-0.0914416	4.84608	0.120055	0.18396	0.661	-0.1395	0.8005
ENSOCUG00000007808	ENSMUSG00000037060	MGI:1923422	Cavin3	1037	852	1037	7226	12064	8303	4237	19.242	13.877	15.294	124.837	222.558	187.855	84.394	P	P	4.26616	3.7946	3.93487	3.99854	6.9639	7.79804	7.55347	6.39906	7.17862	0.168282	-0.0785815	-0.00514984	1.20813	1.55581	1.45387	0.972692	-6.9728	0.00506618	0.0201222	0.0445	1.29775	-1.25325
ENSOCUG00000000849	ENSMUSG00000038533	MGI:1333833	Cbfa2t2	1115	1324	1176	200	202	115	201	20.689	21.564	17.344	3.455	3.727	2.602	4.004	P	A	4.37079	4.43058	4.11634	4.3059	1.78878	1.89783	1.37955	2.00129	1.76686	0.223055	0.254355	0.0898516	-0.948975	-0.90352	-1.11955	-0.860395	20.2947	0.000113046	0.00253363	0.2385	-0.95825	1.19675
ENSOCUG00000005166	ENSMUSG00000031885	MGI:99851	Cbfb	1460	2726	1748	287	219	192	196	27.09	44.399	25.78	4.958	4.04	4.344	3.904	P	A	4.75971	5.47246	4.68816	4.97344	2.30983	2.0144	2.11902	1.96495	2.10205	0.426659	0.799785	0.3892	-0.73179	-0.854928	-0.811323	-0.875543	7.56867	0.0751086	0.132256	0.6135	-0.8185	1.432
ENSOCUG00000004808	ENSMUSG00000034342	MGI:88279	Cbl	3356	5366	4670	1520	790	483	822	62.271	87.397	68.873	26.26	14.574	10.928	16.373	P	P	5.96048	6.44952	6.10587	6.17196	4.71478	3.86533	3.44993	4.03323	4.01582	1.05527	1.31128	1.13138	0.270644	-0.0834246	-0.256568	-0.0134378	7.1344	0.00946053	0.0309736	1.183	-0.0205	1.2035
[truncated: 8,510 more rows]
