# Supplementary material for: Transcriptomics as Precision Medicine to Classify <em>In Vivo</em> Models of Dietary-Induced Atherosclerosis at Cellular and Molecular Levels
Source: Preprints.org preprint supplement (doi:10.20944/preprints201809.0082.v1), 2018-09-05
Supplement: Supplementary file 11 [file Supplemental_Table_1.xlsx]

## Sheet: rabbit_to_mouse_homology
ENSEMBL rabbit gene ID	ENSEMBL mouse gene ID	NCBI mouse gene ID	MGI mouse gene ID	Mouse gene symbol	Gene name
ENSOCUG00000025604	ENSMUSG00000056201	12631	MGI:101757	Cfl1	cofilin 1, non-muscle
ENSOCUG00000009669	ENSMUSG00000024261	20983	MGI:101759	Syt4	synaptotagmin IV
ENSOCUG00000002165	ENSMUSG00000029439	231769	MGI:101760	Sfswap	splicing factor SWAP
ENSOCUG00000029407	ENSMUSG00000056758	15364	MGI:101761	Hmga2	high mobility group AT-hook 2
ENSOCUG00000009383	ENSMUSG00000062929	12632	MGI:101763	Cfl2	cofilin 2, muscle
ENSOCUG00000021398	ENSMUSG00000028969	12568	MGI:101765	Cdk5	cyclin-dependent kinase 5
ENSOCUG00000017148	ENSMUSG00000032547	20187	MGI:101766	Ryk	receptor-like tyrosine kinase
ENSOCUG00000012152	ENSMUSG00000038612	17210	MGI:101769	Mcl1	myeloid cell leukemia sequence 1
ENSOCUG00000015787	ENSMUSG00000027420	12075	MGI:101770	Bfsp1	beaded filament structural protein 1, in lens-CP94
ENSOCUG00000014211	ENSMUSG00000041308	20650	MGI:101771	Sntb2	syntrophin, basic 2
ENSOCUG00000011916	ENSMUSG00000027488	20648	MGI:101772	Snta1	syntrophin, acidic 1
ENSOCUG00000011550	ENSMUSG00000022901	12524	MGI:101773	Cd86	CD86 antigen
ENSOCUG00000009504	ENSMUSG00000075122	12519	MGI:101775	Cd80	CD80 antigen
ENSOCUG00000005182	ENSMUSG00000026468	16872	MGI:101776	Lhx4	LIM homeobox protein 4
ENSOCUG00000004359	ENSMUSG00000026249	20720	MGI:101780	Serpine2	serine (or cysteine) peptidase inhibitor, clade E, member 2
ENSOCUG00000016211	ENSMUSG00000060429	20649	MGI:101781	Sntb1	syntrophin, basic 1
ENSOCUG00000010152	ENSMUSG00000030340	20276	MGI:101782	Scnn1a	sodium channel, nonvoltage-gated 1 alpha
ENSOCUG00000001454	ENSMUSG00000004891	18008	MGI:101784	Nes	nestin
ENSOCUG00000005775	ENSMUSG00000017861	17865	MGI:101785	Mybl2	myeloblastosis oncogene-like 2
ENSOCUG00000005389	ENSMUSG00000028890	17764	MGI:101786	Mtf1	metal response element binding transcription factor 1
ENSOCUG00000029086	ENSMUSG00000064341	17716	MGI:101787	mt-Nd1	mitochondrially encoded NADH dehydrogenase 1
ENSOCUG00000022623	ENSMUSG00000078695	217149	MGI:101788	Cisd3	CDGSH iron sulfur domain 3
ENSOCUG00000011841	ENSMUSG00000056394	16881	MGI:101789	Lig1	ligase I, DNA, ATP-dependent
ENSOCUG00000010425	ENSMUSG00000027533	16592	MGI:101790	Fabp5	fatty acid binding protein 5, epidermal
ENSOCUG00000027605	ENSMUSG00000042258	16392	MGI:101791	Isl1	ISL1 transcription factor, LIM/homeodomain
ENSOCUG00000022794	ENSMUSG00000048376	14062	MGI:101802	F2r	coagulation factor II (thrombin) receptor
ENSOCUG00000000015	ENSMUSG00000003865	14936	MGI:101805	Gys1	glycogen synthase 1, muscle
ENSOCUG00000005597	ENSMUSG00000044042	14260	MGI:101815	Fmn1	formin 1
ENSOCUG00000009576	ENSMUSG00000024151	17685	MGI:101816	Msh2	mutS homolog 2
ENSOCUG00000010521	ENSMUSG00000009406	13712	MGI:101833	Elk1	ELK1, member of ETS oncogene family
ENSOCUG00000029248	ENSMUSG00000035198	103733	MGI:101834	Tubg1	tubulin, gamma 1
ENSOCUG00000005668	ENSMUSG00000026875	22029	MGI:101836	Traf1	TNF receptor-associated factor 1
ENSOCUG00000007979	ENSMUSG00000014767	21374	MGI:101838	Tbp	TATA box binding protein
ENSOCUG00000027112	ENSMUSG00000030432	19943	MGI:101839	Rpl28	ribosomal protein L28
ENSOCUG00000005461	ENSMUSG00000061130	19043	MGI:101841	Ppm1b	protein phosphatase 1B, magnesium dependent, beta isoform
ENSOCUG00000001105	ENSMUSG00000029522	18778	MGI:101842	Pla2g1b	phospholipase A2, group IB, pancreas
ENSOCUG00000004273	ENSMUSG00000041859	17215	MGI:101845	Mcm3	minichromosome maintenance complex component 3
ENSOCUG00000011893	ENSMUSG00000032192	14697	MGI:101848	Gnb5	guanine nucleotide binding protein (G protein), beta 5
ENSOCUG00000003245	ENSMUSG00000020372	14694	MGI:101849	Rack1	receptor for activated C kinase 1
ENSOCUG00000009234	ENSMUSG00000040455	77593	MGI:101850	Usp45	ubiquitin specific petidase 45
ENSOCUG00000014647	ENSMUSG00000020124	14479	MGI:101857	Usp15	ubiquitin specific peptidase 15
ENSOCUG00000023493	ENSMUSG00000058690	72972	MGI:101859	Ccser2	coiled-coil serine rich 2
ENSOCUG00000013802	ENSMUSG00000017390	11676	MGI:101863	Aldoc	aldolase C, fructose-bisphosphate
ENSOCUG00000003439	ENSMUSG00000039952	13138	MGI:101864	Dag1	dystroglycan 1
ENSOCUG00000007080	ENSMUSG00000022847	21832	MGI:101875	Thpo	thrombopoietin
ENSOCUG00000007955	ENSMUSG00000055320	21676	MGI:101876	Tead1	TEA domain family member 1
ENSOCUG00000017812	ENSMUSG00000032228	21406	MGI:101877	Tcf12	transcription factor 12
ENSOCUG00000007732	ENSMUSG00000002250	19015	MGI:101884	Ppard	peroxisome proliferator activator receptor delta
ENSOCUG00000017160	ENSMUSG00000024406	18999	MGI:101893	Pou5f1	POU domain, class 5, transcription factor 1
ENSOCUG00000010927	ENSMUSG00000056854	18994	MGI:101894	Pou3f4	POU domain, class 3, transcription factor 4
ENSOCUG00000005412	ENSMUSG00000090125	18991	MGI:101896	Pou3f1	POU domain, class 3, transcription factor 1
ENSOCUG00000021776	ENSMUSG00000008496	18987	MGI:101897	Pou2f2	POU domain, class 2, transcription factor 2
ENSOCUG00000015479	ENSMUSG00000026565	18986	MGI:101898	Pou2f1	POU domain, class 2, transcription factor 1
ENSOCUG00000008356	ENSMUSG00000041193	18784	MGI:101899	Pla2g5	phospholipase A2, group V
ENSOCUG00000010244	ENSMUSG00000000957	17387	MGI:101900	Mmp14	matrix metallopeptidase 14 (membrane-inserted)
ENSOCUG00000027272	ENSMUSG00000049649	14748	MGI:101908	Gpr3	G-protein coupled receptor 3
ENSOCUG00000016272	ENSMUSG00000041468	14738	MGI:101909	Gpr12	G-protein coupled receptor 12
ENSOCUG00000002582	ENSMUSG00000021678	14063	MGI:101910	F2rl1	coagulation factor II (thrombin) receptor-like 1
ENSOCUG00000000114	ENSMUSG00000027368	13537	MGI:101911	Dusp2	dual specificity phosphatase 2
ENSOCUG00000014269	ENSMUSG00000022174	13135	MGI:101912	Dad1	defender against cell death 1
ENSOCUG00000025961	ENSMUSG00000078185	12663	MGI:101913	Chml	choroideremia-like
ENSOCUG00000015619	ENSMUSG00000003657	12308	MGI:101914	Calb2	calbindin 2
ENSOCUG00000001497	ENSMUSG00000019874	12140	MGI:101916	Fabp7	fatty acid binding protein 7, brain
ENSOCUG00000028156	ENSMUSG00000020650	12033	MGI:101917	Bcap29	B cell receptor associated protein 29
ENSOCUG00000004412	ENSMUSG00000031731	11765	MGI:101919	Ap1g1	adaptor protein complex AP-1, gamma 1 subunit
ENSOCUG00000023153	ENSMUSG00000060279	11771	MGI:101921	Ap2a1	adaptor-related protein complex 2, alpha 1 subunit
ENSOCUG00000011500	ENSMUSG00000028364	21923	MGI:101922	Tnc	tenascin C
ENSOCUG00000001808	ENSMUSG00000024597	20496	MGI:101924	Slc12a2	solute carrier family 12, member 2
ENSOCUG00000013123	ENSMUSG00000044041	16663	MGI:101925	Krt13	keratin 13
ENSOCUG00000008599	ENSMUSG00000029755	13395	MGI:101926	Dlx5	distal-less homeobox 5
ENSOCUG00000008609	ENSMUSG00000029754	13396	MGI:101927	Dlx6	distal-less homeobox 6
ENSOCUG00000000718	ENSMUSG00000005089	20511	MGI:101931	Slc1a2	solute carrier family 1 (glial high affinity glutamate transporter), member 2
ENSOCUG00000008181	ENSMUSG00000037852	12876	MGI:101932	Cpe	carboxypeptidase E
ENSOCUG00000006771	ENSMUSG00000038482	21781	MGI:101934	Tfdp1	transcription factor Dp 1
ENSOCUG00000023091	ENSMUSG00000019876	18768	MGI:101937	Pkib	protein kinase inhibitor beta, cAMP dependent, testis specific
ENSOCUG00000002240	ENSMUSG00000032498	17350	MGI:101938	Mlh1	mutL homolog 1
ENSOCUG00000005767	ENSMUSG00000027875	15360	MGI:101939	Hmgcs2	3-hydroxy-3-methylglutaryl-Coenzyme A synthase 2
ENSOCUG00000006010	ENSMUSG00000030220	11857	MGI:101940	Arhgdib	Rho, GDP dissociation inhibitor (GDI) beta
ENSOCUG00000000856	ENSMUSG00000027490	13555	MGI:101941	E2f1	E2F transcription factor 1
ENSOCUG00000027637	ENSMUSG00000025317	12352	MGI:101946	Car5a	carbonic anhydrase 5a, mitochondrial
ENSOCUG00000001357	ENSMUSG00000000568	11991	MGI:101947	Hnrnpd	heterogeneous nuclear ribonucleoprotein D
ENSOCUG00000001726	ENSMUSG00000015957	22411	MGI:101948	Wnt11	wingless-type MMTV integration site family, member 11
ENSOCUG00000013584	ENSMUSG00000030166	19365	MGI:101949	Rad52	RAD52 homolog, DNA repair protein
ENSOCUG00000006148	ENSMUSG00000023964	12311	MGI:101950	Calcr	calcitonin receptor
ENSOCUG00000023061	ENSMUSG00000028854	20544	MGI:102462	Slc9a1	solute carrier family 9 (sodium/hydrogen exchanger), member 1
ENSOCUG00000012556	ENSMUSG00000027544	18019	MGI:102463	Nfatc2	nuclear factor of activated T cells, cytoplasmic, calcineurin dependent 2
ENSOCUG00000012112	ENSMUSG00000040548	21763	MGI:102465	Tex2	testis expressed gene 2
ENSOCUG00000015400	ENSMUSG00000026604	19250	MGI:102467	Ptpn14	protein tyrosine phosphatase, non-receptor type 14
ENSOCUG00000014833	ENSMUSG00000054580	18779	MGI:102468	Pla2r1	phospholipase A2 receptor 1
ENSOCUG00000006480	ENSMUSG00000033016	18018	MGI:102469	Nfatc1	nuclear factor of activated T cells, cytoplasmic, calcineurin dependent 1
ENSOCUG00000029113	ENSMUSG00000064368	17722	MGI:102495	mt-Nd6	mitochondrially encoded NADH dehydrogenase 6
ENSOCUG00000029112	ENSMUSG00000064367	17721	MGI:102496	mt-Nd5	mitochondrially encoded NADH dehydrogenase 5
ENSOCUG00000029107	ENSMUSG00000065947	17720	MGI:102497	mt-Nd4l	mitochondrially encoded NADH dehydrogenase 4L
ENSOCUG00000029108	ENSMUSG00000064363	17719	MGI:102498	mt-Nd4	mitochondrially encoded NADH dehydrogenase 4
ENSOCUG00000029105	ENSMUSG00000064360	17718	MGI:102499	mt-Nd3	mitochondrially encoded NADH dehydrogenase 3
ENSOCUG00000029090	ENSMUSG00000064345	17717	MGI:102500	mt-Nd2	mitochondrially encoded NADH dehydrogenase 2
ENSOCUG00000029115	ENSMUSG00000064370	17711	MGI:102501	mt-Cytb	mitochondrially encoded cytochrome b
ENSOCUG00000029103	ENSMUSG00000064358	17710	MGI:102502	mt-Co3	mitochondrially encoded cytochrome c oxidase III
ENSOCUG00000029099	ENSMUSG00000064354	17709	MGI:102503	mt-Co2	mitochondrially encoded cytochrome c oxidase II
ENSOCUG00000029096	ENSMUSG00000064351	17708	MGI:102504	mt-Co1	mitochondrially encoded cytochrome c oxidase I
ENSOCUG00000003229	ENSMUSG00000074442	13226	MGI:102509	Defa31	defensin, alpha, 31
ENSOCUG00000023766	ENSMUSG00000031553	11497	MGI:102518	Adam3	a disintegrin and metallopeptidase domain 3 (cyritestin)
ENSOCUG00000008071	ENSMUSG00000027447	13010	MGI:102519	Cst3	cystatin C
ENSOCUG00000026538	ENSMUSG00000004264	12034	MGI:102520	Phb2	prohibitin 2
ENSOCUG00000012081	ENSMUSG00000020882	12295	MGI:102522	Cacnb1	calcium channel, voltage-dependent, beta 1 subunit
ENSOCUG00000012636	ENSMUSG00000031688	18997	MGI:102524	Pou4f2	POU domain, class 4, transcription factor 2
ENSOCUG00000026026	ENSMUSG00000030699	21389	MGI:102539	Tbx6	T-box 6
ENSOCUG00000012715	ENSMUSG00000018263	21388	MGI:102541	Tbx5	T-box 5
ENSOCUG00000014878	ENSMUSG00000038274	14109	MGI:102547	Fau	Finkel-Biskis-Reilly murine sarcoma virus (FBR-MuSV) ubiquitously expressed (fox derived)
ENSOCUG00000012834	ENSMUSG00000002496	22084	MGI:102548	Tsc2	tuberous sclerosis 2
ENSOCUG00000004450	ENSMUSG00000072082	12449	MGI:102551	Ccnf	cyclin F
ENSOCUG00000012801	ENSMUSG00000025431	11571	MGI:102553	Crisp1	cysteine-rich secretory protein 1
ENSOCUG00000010834	ENSMUSG00000000094	21387	MGI:102556	Tbx4	T-box 4
ENSOCUG00000000407	ENSMUSG00000022129	13190	MGI:102563	Dct	dopachrome tautomerase
ENSOCUG00000002831	ENSMUSG00000032015	18988	MGI:102565	Pou2f3	POU domain, class 2, transcription factor 3
ENSOCUG00000029347	ENSMUSG00000040632	18185	MGI:102567	Nrl	neural retina leucine zipper gene
ENSOCUG00000021324	ENSMUSG00000040138	17986	MGI:102570	Ndp	Norrie disease (pseudoglioma) (human)
ENSOCUG00000006735	ENSMUSG00000020936	18107	MGI:102579	Nmt1	N-myristoyltransferase 1
ENSOCUG00000000590	ENSMUSG00000066441	17252	MGI:102581	Rdh11	retinol dehydrogenase 11
ENSOCUG00000013450	ENSMUSG00000018830	17880	MGI:102643	Myh11	myosin, heavy polypeptide 11, smooth muscle
ENSOCUG00000022563	ENSMUSG00000020307	216150	MGI:102657	Cdc34	cell division cycle 34
ENSOCUG00000021025	ENSMUSG00000003099	19060	MGI:102666	Ppp5c	protein phosphatase 5, catalytic subunit
ENSOCUG00000007445	ENSMUSG00000052468	18857	MGI:102667	Pmp2	peripheral myelin protein 2
ENSOCUG00000028189	ENSMUSG00000026936	16820	MGI:102669	Lcn3	lipocalin 3
ENSOCUG00000008597	ENSMUSG00000021758	13206	MGI:102670	Ddx4	DEAD (Asp-Glu-Ala-Asp) box polypeptide 4
ENSOCUG00000017751	ENSMUSG00000070691	12399	MGI:102672	Runx3	runt related transcription factor 3
ENSOCUG00000006106	ENSMUSG00000030963	22242	MGI:102674	Umod	uromodulin
ENSOCUG00000016975	ENSMUSG00000030905	12971	MGI:102675	Crym	crystallin, mu
ENSOCUG00000017956	ENSMUSG00000023088	17250	MGI:102676	Abcc1	ATP-binding cassette, sub-family C (CFTR/MRP), member 1
ENSOCUG00000025400	ENSMUSG00000020536	16897	MGI:102682	Llgl1	LLGL1 scribble cell polarity complex component
ENSOCUG00000027657	ENSMUSG00000019312	14786	MGI:102683	Grb7	growth factor receptor bound protein 7
ENSOCUG00000010815	ENSMUSG00000020687	217232	MGI:102685	Cdc27	cell division cycle 27
ENSOCUG00000016125	ENSMUSG00000033278	19274	MGI:102694	Ptprm	protein tyrosine phosphatase, receptor type, M
ENSOCUG00000004042	ENSMUSG00000033295	19268	MGI:102695	Ptprf	protein tyrosine phosphatase, receptor type, F
ENSOCUG00000006275	ENSMUSG00000058499	18716	MGI:102696	Pip	prolactin induced protein
ENSOCUG00000025556	ENSMUSG00000069823	258923	MGI:102698	Olfr1	olfactory receptor 1
ENSOCUG00000009720	ENSMUSG00000031200	17763	MGI:102699	Mtcp1	mature T cell proliferation 1
ENSOCUG00000021735	ENSMUSG00000025348	16404	MGI:102700	Itga7	integrin alpha 7
ENSOCUG00000006831	ENSMUSG00000021303	14706	MGI:102703	Gng4	guanine nucleotide binding protein (G protein), gamma 4
ENSOCUG00000009468	ENSMUSG00000071658	14704	MGI:102704	Gng3	guanine nucleotide binding protein (G protein), gamma 3
ENSOCUG00000014672	ENSMUSG00000043004	14702	MGI:102705	Gng2	guanine nucleotide binding protein (G protein), gamma 2
ENSOCUG00000005160	ENSMUSG00000021273	14137	MGI:102706	Fdft1	farnesyl diphosphate farnesyl transferase 1
ENSOCUG00000013726	ENSMUSG00000031217	13641	MGI:102708	Efnb1	ephrin B1
ENSOCUG00000014520	ENSMUSG00000007655	12389	MGI:102709	Cav1	caveolin 1, caveolae protein
ENSOCUG00000024392	ENSMUSG00000066975	12959	MGI:102716	Cryba4	crystallin, beta A4
ENSOCUG00000007170	ENSMUSG00000029352	12962	MGI:102717	Crybb3	crystallin, beta B3
ENSOCUG00000017780	ENSMUSG00000022122	13618	MGI:102720	Ednrb	endothelin receptor type B
ENSOCUG00000004806	ENSMUSG00000001151	18541	MGI:102722	Pcnt	pericentrin (kendrin)
ENSOCUG00000014299	ENSMUSG00000041763	22019	MGI:102724	Tpp2	tripeptidyl peptidase II
ENSOCUG00000029376	ENSMUSG00000045996	17749	MGI:102725	Polr2k	polymerase (RNA) II (DNA directed) polypeptide K
ENSOCUG00000001265	ENSMUSG00000029366	13178	MGI:102726	Dck	deoxycytidine kinase
ENSOCUG00000011644	ENSMUSG00000023247	14915	MGI:102738	Guca2a	guanylate cyclase activator 2a (guanylin)
ENSOCUG00000007012	ENSMUSG00000024369	27632	MGI:102744	Nelfe	negative elongation factor complex member E, Rdbp
ENSOCUG00000011338	ENSMUSG00000000275	217069	MGI:102749	Trim25	tripartite motif-containing 25
ENSOCUG00000021279	ENSMUSG00000028042	22724	MGI:102755	Zbtb7b	zinc finger and BTB domain containing 7B
ENSOCUG00000001950	ENSMUSG00000057163	22072	MGI:102759	Prss2	protease, serine 2
ENSOCUG00000002507	ENSMUSG00000031574	20845	MGI:102760	Star	steroidogenic acute regulatory protein
ENSOCUG00000023622	ENSMUSG00000026204	19275	MGI:102765	Ptprn	protein tyrosine phosphatase, receptor type, N
ENSOCUG00000013259	ENSMUSG00000030605	17304	MGI:102768	Mfge8	milk fat globule-EGF factor 8 protein
ENSOCUG00000005152	ENSMUSG00000069922	382053	MGI:102773	Ces3a	carboxylesterase 3A
ENSOCUG00000002043	ENSMUSG00000028029	13722	MGI:102774	Aimp1	aminoacyl tRNA synthetase complex-interacting multifunctional protein 1
ENSOCUG00000025980	ENSMUSG00000003033	11767	MGI:102776	Ap1m1	adaptor-related protein complex AP-1, mu subunit 1
ENSOCUG00000027205	ENSMUSG00000024134	20472	MGI:102778	Six2	sine oculis-related homeobox 2
ENSOCUG00000003290	ENSMUSG00000024742	14156	MGI:102779	Fen1	flap structure specific endonuclease 1
ENSOCUG00000014268	ENSMUSG00000051367	20471	MGI:102780	Six1	sine oculis-related homeobox 1
ENSOCUG00000010900	ENSMUSG00000030782	21804	MGI:102784	Tgfb1i1	transforming growth factor beta 1 induced transcript 1
ENSOCUG00000020936	ENSMUSG00000029608	19894	MGI:102788	Rph3a	rabphilin 3A
ENSOCUG00000022307	ENSMUSG00000073639	19330	MGI:102790	Rab18	RAB18, member RAS oncogene family
ENSOCUG00000017963	ENSMUSG00000023978	19133	MGI:102791	Prph2	peripherin 2
ENSOCUG00000005247	ENSMUSG00000022816	14314	MGI:102793	Fstl1	follistatin-like 1
ENSOCUG00000014756	ENSMUSG00000031594	234199	MGI:102795	Fgl1	fibrinogen-like protein 1
ENSOCUG00000012677	ENSMUSG00000048120	12495	MGI:102805	Entpd1	ectonucleoside triphosphate diphosphohydrolase 1
ENSOCUG00000016398	ENSMUSG00000052155	11480	MGI:102806	Acvr2a	activin receptor IIA
ENSOCUG00000008625	ENSMUSG00000068739	20226	MGI:102809	Sars	seryl-aminoacyl-tRNA synthetase
ENSOCUG00000029297	ENSMUSG00000030226	109593	MGI:102810	Lmo3	LIM domain only 3
ENSOCUG00000001532	ENSMUSG00000032698	16909	MGI:102811	Lmo2	LIM domain only 2
ENSOCUG00000002626	ENSMUSG00000036111	109594	MGI:102812	Lmo1	LIM domain only 1
ENSOCUG00000002112	ENSMUSG00000002100	17868	MGI:102844	Mybpc3	myosin binding protein C, cardiac
ENSOCUG00000014828	ENSMUSG00000021070	12062	MGI:102845	Bdkrb2	bradykinin receptor, beta 2
ENSOCUG00000011311	ENSMUSG00000109764	16621	MGI:102849	Klkb1	kallikrein B, plasma 1
ENSOCUG00000004891	ENSMUSG00000029644	18609	MGI:102851	Pdx1	pancreatic and duodenal homeobox 1
ENSOCUG00000014477	ENSMUSG00000026436	13714	MGI:102853	Elk4	ELK4, member of ETS oncogene family
ENSOCUG00000010089	ENSMUSG00000058558	100503670	MGI:102854	Rpl5	ribosomal protein L5
ENSOCUG00000010706	ENSMUSG00000029135	14284	MGI:102858	Fosl2	fos-like antigen 2
ENSOCUG00000002613	ENSMUSG00000021614	13003	MGI:102889	Vcan	versican
ENSOCUG00000002129	ENSMUSG00000020326	12450	MGI:102890	Ccng1	cyclin G1
ENSOCUG00000003091	ENSMUSG00000031659	11513	MGI:102891	Adcy7	adenylate cyclase 7
ENSOCUG00000001536	ENSMUSG00000030711	20887	MGI:102896	Sult1a1	sulfotransferase family 1A, phenol-preferring, member 1
ENSOCUG00000017423	ENSMUSG00000030513	18553	MGI:102897	Pcsk6	proprotein convertase subtilisin/kexin type 6
ENSOCUG00000004360	ENSMUSG00000023943	20888	MGI:102928	Sult1c1	sulfotransferase family, cytosolic, 1C, member 1
ENSOCUG00000013207	ENSMUSG00000009739	19009	MGI:102935	Pou6f1	POU domain, class 6, transcription factor 1
ENSOCUG00000015774	ENSMUSG00000020390	22210	MGI:102944	Ube2b	ubiquitin-conjugating enzyme E2B
ENSOCUG00000013779	ENSMUSG00000002057	15218	MGI:102949	Foxn1	forkhead box N1
ENSOCUG00000021918	ENSMUSG00000025357	13139	MGI:102952	Dgka	diacylglycerol kinase, alpha
ENSOCUG00000007519	ENSMUSG00000069089	12572	MGI:102956	Cdk7	cyclin-dependent kinase 7
ENSOCUG00000016739	ENSMUSG00000016308	22209	MGI:102959	Ube2a	ubiquitin-conjugating enzyme E2A
ENSOCUG00000007648	ENSMUSG00000054892	22165	MGI:102960	Txk	TXK tyrosine kinase
ENSOCUG00000023063	ENSMUSG00000003477	21743	MGI:102963	Inmt	indolethylamine N-methyltransferase
ENSOCUG00000007623	ENSMUSG00000032553	20818	MGI:102964	Srprb	signal recognition particle receptor, B subunit
ENSOCUG00000017729	ENSMUSG00000034810	20272	MGI:102965	Scn7a	sodium channel, voltage-gated, type VII, alpha
ENSOCUG00000003474	ENSMUSG00000071489	19214	MGI:102966	Ptgdr	prostaglandin D receptor
ENSOCUG00000023278	ENSMUSG00000054764	17773	MGI:102967	Mtnr1a	melatonin receptor 1A
ENSOCUG00000009933	ENSMUSG00000022659	14525	MGI:102969	Gcsam	germinal center associated, signaling and motility
ENSOCUG00000008381	ENSMUSG00000026383	226352	MGI:103006	Epb41l5	erythrocyte membrane protein band 4.1 like 5
ENSOCUG00000010825	ENSMUSG00000024376	13824	MGI:103007	Epb41l4a	erythrocyte membrane protein band 4.1 like 4a
ENSOCUG00000021196	ENSMUSG00000024044	13823	MGI:103008	Epb41l3	erythrocyte membrane protein band 4.1 like 3
ENSOCUG00000001799	ENSMUSG00000019978	13822	MGI:103009	Epb41l2	erythrocyte membrane protein band 4.1 like 2
ENSOCUG00000004091	ENSMUSG00000027624	13821	MGI:103010	Epb41l1	erythrocyte membrane protein band 4.1 like 1
ENSOCUG00000025569	ENSMUSG00000037944	12775	MGI:103011	Ccr7	chemokine (C-C motif) receptor 7
ENSOCUG00000010022	ENSMUSG00000014859	104394	MGI:103012	E2f4	E2F transcription factor 4
ENSOCUG00000011599	ENSMUSG00000051331	12288	MGI:103013	Cacna1c	calcium channel, voltage-dependent, L type, alpha 1C subunit
ENSOCUG00000008827	ENSMUSG00000031712	16168	MGI:103014	Il15	interleukin 15
ENSOCUG00000024751	ENSMUSG00000003420	14132	MGI:103017	Fcgrt	Fc receptor, IgG, alpha chain transporter
ENSOCUG00000015932	ENSMUSG00000009394	20965	MGI:103020	Syn2	synapsin II
ENSOCUG00000008787	ENSMUSG00000030243	19691	MGI:103021	Recql	RecQ protein-like
ENSOCUG00000009050	ENSMUSG00000042453	19699	MGI:103022	Reln	reelin
ENSOCUG00000000353	ENSMUSG00000064068	17827	MGI:103025	Mtx1	metaxin 1
ENSOCUG00000005700	ENSMUSG00000023051	21357	MGI:103027	Tarbp2	TARBP2, RISC loading complex RNA binding subunit
ENSOCUG00000025494	ENSMUSG00000032181	20255	MGI:103032	Scg3	secretogranin III
ENSOCUG00000012378	ENSMUSG00000050711	20254	MGI:103033	Scg2	secretogranin II
ENSOCUG00000007929	ENSMUSG00000002147	20852	MGI:103034	Stat6	signal transducer and activator of transcription 6
ENSOCUG00000005078	ENSMUSG00000020919	20851	MGI:103035	Stat5b	signal transducer and activator of transcription 5B
ENSOCUG00000023066	ENSMUSG00000004043	20850	MGI:103036	Stat5a	signal transducer and activator of transcription 5A
ENSOCUG00000011034	ENSMUSG00000004040	20848	MGI:103038	Stat3	signal transducer and activator of transcription 3
ENSOCUG00000011786	ENSMUSG00000028108	13601	MGI:103060	Ecm1	extracellular matrix protein 1
ENSOCUG00000002466	ENSMUSG00000062939	20849	MGI:103062	Stat4	signal transducer and activator of transcription 4
ENSOCUG00000002455	ENSMUSG00000026104	20846	MGI:103063	Stat1	signal transducer and activator of transcription 1
ENSOCUG00000012338	ENSMUSG00000000787	13205	MGI:103064	Ddx3x	DEAD/H (Asp-Glu-Ala-Asp/His) box polypeptide 3, X-linked
ENSOCUG00000007579	ENSMUSG00000031229	22589	MGI:103067	Atrx	ATRX, chromatin remodeler
ENSOCUG00000002485	ENSMUSG00000073421	14961	MGI:103070	H2-Ab1	histocompatibility 2, class II antigen A, beta 1
ENSOCUG00000002704	ENSMUSG00000022391	19387	MGI:103071	Rangap1	RAN GTPase activating protein 1
ENSOCUG00000026796	ENSMUSG00000029860	22793	MGI:103072	Zyx	zyxin
ENSOCUG00000015673	ENSMUSG00000024734	22786	MGI:103073	Zp1	zona pellucida glycoprotein 1
ENSOCUG00000013074	ENSMUSG00000031016	22390	MGI:103075	Wee1	WEE 1 homolog 1 (S. pombe)
ENSOCUG00000027507	ENSMUSG00000022479	22337	MGI:103076	Vdr	vitamin D (1,25-dihydroxyvitamin D3) receptor
ENSOCUG00000013382	ENSMUSG00000041488	20908	MGI:103077	Stx3	syntaxin 3
ENSOCUG00000000835	ENSMUSG00000033735	20751	MGI:103078	Spr	sepiapterin reductase
ENSOCUG00000011120	ENSMUSG00000043991	19290	MGI:103079	Pura	purine rich element binding protein A
ENSOCUG00000014317	ENSMUSG00000026417	18703	MGI:103080	Pigr	polymeric immunoglobulin receptor
ENSOCUG00000012926	ENSMUSG00000014355	17222	MGI:103097	Anapc1	anaphase promoting complex subunit 1
ENSOCUG00000009873	ENSMUSG00000041697	12861	MGI:103099	Cox6a1	cytochrome c oxidase subunit 6A1
ENSOCUG00000027920	ENSMUSG00000031883	12354	MGI:103100	Car7	carbonic anhydrase 7
ENSOCUG00000022738	ENSMUSG00000031444	14058	MGI:103107	F10	coagulation factor X
ENSOCUG00000016441	ENSMUSG00000000706	12231	MGI:103118	Btn1a1	butyrophilin, subfamily 1, member A1
ENSOCUG00000006216	ENSMUSG00000060147	20719	MGI:103123	Serpinb6a	serine (or cysteine) peptidase inhibitor, clade B, member 6a
ENSOCUG00000006551	ENSMUSG00000021381	12022	MGI:103124	Barx1	BarH-like homeobox 1
ENSOCUG00000000057	ENSMUSG00000018707	13424	MGI:103147	Dync1h1	dynein cytoplasmic 1 heavy chain 1
ENSOCUG00000001353	ENSMUSG00000029223	22223	MGI:103149	Uchl1	ubiquitin carboxy-terminal hydrolase L1
ENSOCUG00000016508	ENSMUSG00000027202	20495	MGI:103150	Slc12a1	solute carrier family 12, member 1
ENSOCUG00000000744	ENSMUSG00000017754	18830	MGI:103151	Pltp	phospholipid transfer protein
ENSOCUG00000014105	ENSMUSG00000001260	14405	MGI:103156	Gabrg1	gamma-aminobutyric acid (GABA) A receptor, subunit gamma 1
ENSOCUG00000011323	ENSMUSG00000005980	13419	MGI:103157	Dnase1	deoxyribonuclease I
ENSOCUG00000013904	ENSMUSG00000032578	12700	MGI:103159	Cish	cytokine inducible SH2-containing protein
ENSOCUG00000027203	ENSMUSG00000037053	12007	MGI:103163	Azgp1	alpha-2-glycoprotein 1, zinc
ENSOCUG00000011070	ENSMUSG00000023033	20273	MGI:103169	Scn8a	sodium channel, voltage-gated, type VIII, alpha
ENSOCUG00000023553	ENSMUSG00000029275	14581	MGI:103170	Gfi1	growth factor independent 1
ENSOCUG00000029378	ENSMUSG00000020364	21408	MGI:103172	Zfp354a	zinc finger protein 354A
ENSOCUG00000014421	ENSMUSG00000056569	17528	MGI:103177	Mpz	myelin protein zero
ENSOCUG00000011610	ENSMUSG00000023951	22339	MGI:103178	Vegfa	vascular endothelial growth factor A
ENSOCUG00000017153	ENSMUSG00000050410	106795	MGI:103180	Tcf19	transcription factor 19
ENSOCUG00000007460	ENSMUSG00000072941	20657	MGI:103181	Sod3	superoxide dismutase 3, extracellular
ENSOCUG00000001727	ENSMUSG00000001436	20509	MGI:103182	Slc19a1	solute carrier family 19 (folate transporter), member 1
ENSOCUG00000000406	ENSMUSG00000025878	20184	MGI:103185	Uimc1	ubiquitin interaction motif containing 1
ENSOCUG00000004396	ENSMUSG00000003849	18104	MGI:103187	Nqo1	NAD(P)H dehydrogenase, quinone 1
ENSOCUG00000004249	ENSMUSG00000008575	18028	MGI:103188	Nfib	nuclear factor I/B
ENSOCUG00000015329	ENSMUSG00000018623	17393	MGI:103189	Mmp7	matrix metallopeptidase 7
ENSOCUG00000014614	ENSMUSG00000022824	17063	MGI:103190	Muc13	mucin 13, epithelial transmembrane
ENSOCUG00000010637	ENSMUSG00000005410	17218	MGI:103197	Mcm5	minichromosome maintenance complex component 5
ENSOCUG00000012342	ENSMUSG00000032477	12530	MGI:103198	Cdc25a	cell division cycle 25A
ENSOCUG00000001710	ENSMUSG00000022673	17217	MGI:103199	Mcm4	minichromosome maintenance complex component 4
ENSOCUG00000022666	ENSMUSG00000004655	11826	MGI:103201	Aqp1	aquaporin 1
ENSOCUG00000016161	ENSMUSG00000022407	11564	MGI:103202	Adsl	adenylosuccinate lyase
ENSOCUG00000022836	ENSMUSG00000022126	16365	MGI:103206	Acod1	aconitate decarboxylase 1
ENSOCUG00000014021	ENSMUSG00000021335	20504	MGI:103209	Slc17a1	solute carrier family 17 (sodium phosphate), member 1
ENSOCUG00000026941	ENSMUSG00000036144	17286	MGI:103219	Meox2	mesenchyme homeobox 2
ENSOCUG00000002945	ENSMUSG00000001493	17285	MGI:103220	Meox1	mesenchyme homeobox 1
ENSOCUG00000012518	ENSMUSG00000024331	13506	MGI:103221	Dsc2	desmocollin 2
ENSOCUG00000007470	ENSMUSG00000066687	235320	MGI:103222	Zbtb16	zinc finger and BTB domain containing 16
ENSOCUG00000017826	ENSMUSG00000032051	14148	MGI:103224	Fdx1	ferredoxin 1
ENSOCUG00000011201	ENSMUSG00000028713	13120	MGI:103225	Cyp4b1	cytochrome P450, family 4, subfamily b, polypeptide 1
ENSOCUG00000004430	ENSMUSG00000016756	12763	MGI:103227	Cmah	cytidine monophospho-N-acetylneuraminic acid hydroxylase
ENSOCUG00000014985	ENSMUSG00000020176	14783	MGI:103232	Grb10	growth factor receptor bound protein 10
ENSOCUG00000006754	ENSMUSG00000030451	15204	MGI:103234	Herc2	HECT and RLD domain containing E3 ubiquitin protein ligase 2
ENSOCUG00000004307	ENSMUSG00000027954	13636	MGI:103236	Efna1	ephrin A1
ENSOCUG00000027103	ENSMUSG00000003053	13095	MGI:103238	Cyp2c29	cytochrome P450, family 2, subfamily c, polypeptide 29
ENSOCUG00000024550	ENSMUSG00000005718	83383	MGI:103239	Tfap4	transcription factor AP4
ENSOCUG00000003035	ENSMUSG00000025060	20874	MGI:103241	Slk	STE20-like kinase
ENSOCUG00000003600	ENSMUSG00000040669	13619	MGI:103248	Phc1	polyhomeotic 1
ENSOCUG00000002107	ENSMUSG00000036438	12314	MGI:103250	Calm2	calmodulin 2
ENSOCUG00000013212	ENSMUSG00000020917	104112	MGI:103251	Acly	ATP citrate lyase
ENSOCUG00000026470	ENSMUSG00000019590	13056	MGI:103253	Cyb561	cytochrome b-561
ENSOCUG00000006530	ENSMUSG00000053604	19895	MGI:103254	Rpia	ribose 5-phosphate isomerase A
ENSOCUG00000005395	ENSMUSG00000028894	16330	MGI:103257	Inpp5b	inositol polyphosphate-5-phosphatase B
ENSOCUG00000012989	ENSMUSG00000027719	21744	MGI:103258	Adad1	adenosine deaminase domain containing 1 (testis specific)
ENSOCUG00000025834	ENSMUSG00000053110	22601	MGI:103262	Yap1	yes-associated protein 1
ENSOCUG00000001937	ENSMUSG00000028059	16800	MGI:103264	Arhgef2	rho/rac guanine nucleotide exchange factor (GEF) 2
ENSOCUG00000001181	ENSMUSG00000019779	14302	MGI:103265	Frk	fyn-related kinase
ENSOCUG00000013675	ENSMUSG00000039899	14190	MGI:103266	Fgl2	fibrinogen-like protein 2
ENSOCUG00000017792	ENSMUSG00000031490	13685	MGI:103267	Eif4ebp1	eukaryotic translation initiation factor 4E binding protein 1
ENSOCUG00000022926	ENSMUSG00000026740	13418	MGI:103268	Dnajc1	DnaJ heat shock protein family (Hsp40) member C1
ENSOCUG00000027474	ENSMUSG00000023990	21425	MGI:103270	Tfeb	transcription factor EB
ENSOCUG00000024303	ENSMUSG00000006269	110935	MGI:103285	Atp6v1b1	ATPase, H+ transporting, lysosomal V1 subunit B1
ENSOCUG00000015169	ENSMUSG00000019302	11975	MGI:103286	Atp6v0a1	ATPase, H+ transporting, lysosomal V0 subunit A1
ENSOCUG00000005504	ENSMUSG00000067148	20016	MGI:103288	Polr1c	polymerase (RNA) I polypeptide C
ENSOCUG00000004389	ENSMUSG00000029923	19331	MGI:103292	Rab19	RAB19, member RAS oncogene family
ENSOCUG00000012421	ENSMUSG00000034573	19249	MGI:103293	Ptpn13	protein tyrosine phosphatase, non-receptor type 13
ENSOCUG00000008297	ENSMUSG00000027073	19074	MGI:103294	Prg2	proteoglycan 2, bone marrow
ENSOCUG00000005136	ENSMUSG00000002588	18979	MGI:103295	Pon1	paraoxonase 1
ENSOCUG00000010052	ENSMUSG00000031902	18021	MGI:103296	Nfatc3	nuclear factor of activated T cells, cytoplasmic, calcineurin dependent 3
ENSOCUG00000004145	ENSMUSG00000006567	11979	MGI:103297	Atp7b	ATPase, Cu++ transporting, beta polypeptide
ENSOCUG00000025736	ENSMUSG00000040613	11810	MGI:103298	Apobec1	apolipoprotein B mRNA editing enzyme, catalytic polypeptide 1
ENSOCUG00000005804	ENSMUSG00000027641	19650	MGI:103300	Rbl1	RB transcriptional corepressor like 1
ENSOCUG00000000144	ENSMUSG00000017412	12298	MGI:103301	Cacnb4	calcium channel, voltage-dependent, beta 4 subunit
ENSOCUG00000001085	ENSMUSG00000055471	11682	MGI:103305	Alk	anaplastic lymphoma kinase
ENSOCUG00000016524	ENSMUSG00000002489	21844	MGI:103306	Tiam1	T cell lymphoma invasion and metastasis 1
ENSOCUG00000007401	ENSMUSG00000003352	12297	MGI:103307	Cacnb3	calcium channel, voltage-dependent, beta 3 subunit
ENSOCUG00000005575	ENSMUSG00000061981	14252	MGI:103309	Flot2	flotillin 2
ENSOCUG00000001697	ENSMUSG00000019889	19272	MGI:103310	Ptprk	protein tyrosine phosphatase, receptor type, K
ENSOCUG00000006220	ENSMUSG00000004319	12725	MGI:103555	Clcn3	chloride channel, voltage-sensitive 3
ENSOCUG00000029076	ENSMUSG00000061353	20315	MGI:103556	Cxcl12	chemokine (C-X-C motif) ligand 12
ENSOCUG00000011079	ENSMUSG00000030094	22591	MGI:103557	Xpc	xeroderma pigmentosum, complementation group C
ENSOCUG00000002694	ENSMUSG00000022905	16646	MGI:103560	Kpna1	karyopherin (importin) alpha 1
ENSOCUG00000015913	ENSMUSG00000018362	16647	MGI:103561	Kpna2	karyopherin (importin) alpha 2
ENSOCUG00000004024	ENSMUSG00000016194	15483	MGI:103562	Hsd11b1	hydroxysteroid 11-beta dehydrogenase 1
ENSOCUG00000012464	ENSMUSG00000024670	12511	MGI:103566	Cd6	CD6 antigen
ENSOCUG00000025048	ENSMUSG00000047880	12145	MGI:103567	Cxcr5	chemokine (C-X-C motif) receptor 5
ENSOCUG00000022235	ENSMUSG00000052435	110794	MGI:103572	Cebpe	CCAAT/enhancer binding protein (C/EBP), epsilon
ENSOCUG00000025135	ENSMUSG00000071637	12609	MGI:103573	Cebpd	CCAAT/enhancer binding protein (C/EBP), delta
ENSOCUG00000002244	ENSMUSG00000021314	218038	MGI:103574	Amph	amphiphysin
ENSOCUG00000022505	ENSMUSG00000036309	21402	MGI:103575	Skp1a	S-phase kinase-associated protein 1A
ENSOCUG00000005935	ENSMUSG00000020676	20292	MGI:103576	Ccl11	chemokine (C-C motif) ligand 11
ENSOCUG00000011099	ENSMUSG00000037335	15110	MGI:103577	Hand1	heart and neural crest derivatives expressed 1
ENSOCUG00000016256	ENSMUSG00000038193	15111	MGI:103580	Hand2	heart and neural crest derivatives expressed 2
ENSOCUG00000017885	ENSMUSG00000057280	18198	MGI:103581	Musk	muscle, skeletal, receptor tyrosine kinase
ENSOCUG00000012414	ENSMUSG00000026048	22592	MGI:103582	Ercc5	excision repair cross-complementing rodent repair deficiency, complementation group 5
ENSOCUG00000012590	ENSMUSG00000079109	18861	MGI:104288	Pms2	PMS1 homolog2, mismatch repair system component
ENSOCUG00000006229	ENSMUSG00000027298	22174	MGI:104294	Tyro3	TYRO3 protein tyrosine kinase 3
ENSOCUG00000017684	ENSMUSG00000022372	20491	MGI:104295	Sla	src-like adaptor
ENSOCUG00000022891	ENSMUSG00000030411	384569	MGI:104296	Nova2	neuro-oncological ventral antigen 2
ENSOCUG00000017622	ENSMUSG00000021047	664883	MGI:104297	Nova1	neuro-oncological ventral antigen 1
ENSOCUG00000000895	ENSMUSG00000039942	19219	MGI:104311	Ptger4	prostaglandin E receptor 4 (subtype EP4)
ENSOCUG00000023683	ENSMUSG00000020282	13650	MGI:104328	Rhbdf1	rhomboid 5 homolog 1
ENSOCUG00000000206	ENSMUSG00000006546	12958	MGI:104336	Cryba2	crystallin, beta A2
ENSOCUG00000023355	ENSMUSG00000030761	17921	MGI:104510	Myo7a	myosin VIIA
ENSOCUG00000008587	ENSMUSG00000026700	22164	MGI:104511	Tnfsf4	tumor necrosis factor (ligand) superfamily, member 4
ENSOCUG00000016499	ENSMUSG00000046949	18105	MGI:104513	Nqo2	N-ribosyldihydronicotinamide quinone reductase 2
ENSOCUG00000023797	ENSMUSG00000032726	12163	MGI:104515	Bmp8a	bone morphogenetic protein 8a
ENSOCUG00000006642	ENSMUSG00000026187	22596	MGI:104517	Xrcc5	X-ray repair complementing defective repair in Chinese hamster cells 5
ENSOCUG00000015404	ENSMUSG00000053024	21367	MGI:104518	Cntn2	contactin 2
ENSOCUG00000022960	ENSMUSG00000040808	12309	MGI:104528	S100g	S100 calcium binding protein G
ENSOCUG00000008076	ENSMUSG00000042428	17309	MGI:104532	Mgat3	mannoside acetylglucosaminyltransferase 3
ENSOCUG00000000686	ENSMUSG00000019122	20308	MGI:104533	Ccl9	chemokine (C-C motif) ligand 9
ENSOCUG00000022137	ENSMUSG00000000301	18618	MGI:104535	Pemt	phosphatidylethanolamine N-methyltransferase
ENSOCUG00000003883	ENSMUSG00000017146	12189	MGI:104537	Brca1	breast cancer 1, early onset
ENSOCUG00000014297	ENSMUSG00000047631	103161	MGI:104539	Apof	apolipoprotein F
ENSOCUG00000012001	ENSMUSG00000003809	270076	MGI:104541	Gcdh	glutaryl-Coenzyme A dehydrogenase
ENSOCUG00000001963	ENSMUSG00000055322	21961	MGI:104552	Tns1	tensin 1
ENSOCUG00000002190	ENSMUSG00000035158	17342	MGI:104554	Mitf	melanogenesis associated transcription factor
ENSOCUG00000021619	ENSMUSG00000074622	16658	MGI:104555	Mafb	v-maf musculoaponeurotic fibrosarcoma oncogene family, protein B (avian)
ENSOCUG00000016048	ENSMUSG00000023067	12575	MGI:104556	Cdkn1a	cyclin-dependent kinase inhibitor 1A (P21)
ENSOCUG00000025948	ENSMUSG00000031309	110651	MGI:104557	Rps6ka3	ribosomal protein S6 kinase polypeptide 3
ENSOCUG00000010887	ENSMUSG00000003644	20111	MGI:104558	Rps6ka1	ribosomal protein S6 kinase polypeptide 1
ENSOCUG00000016268	ENSMUSG00000005973	19672	MGI:104559	Rcn1	reticulocalbin 1
ENSOCUG00000014783	ENSMUSG00000034187	18195	MGI:104560	Nsf	N-ethylmaleimide sensitive fusion protein
ENSOCUG00000012222	ENSMUSG00000024581	108123	MGI:104561	Napg	N-ethylmaleimide sensitive fusion protein attachment protein gamma
ENSOCUG00000009263	ENSMUSG00000027438	17957	MGI:104562	Napb	N-ethylmaleimide sensitive fusion protein attachment protein beta
ENSOCUG00000000967	ENSMUSG00000006024	108124	MGI:104563	Napa	N-ethylmaleimide sensitive fusion protein attachment protein alpha
ENSOCUG00000013974	ENSMUSG00000003031	12576	MGI:104565	Cdkn1b	cyclin-dependent kinase inhibitor 1B
ENSOCUG00000000004	ENSMUSG00000025265	14163	MGI:104566	Fgd1	FYVE, RhoGEF and PH domain containing 1
ENSOCUG00000012449	ENSMUSG00000022831	15163	MGI:104568	Hcls1	hematopoietic cell specific Lyn substrate 1
ENSOCUG00000025967	ENSMUSG00000000605	12727	MGI:104571	Clcn4	chloride channel, voltage-sensitive 4
ENSOCUG00000025224	ENSMUSG00000029674	16885	MGI:104572	Limk1	LIM-domain containing, protein kinase
ENSOCUG00000001933	ENSMUSG00000025314	19271	MGI:104574	Ptprj	protein tyrosine phosphatase, receptor type, J
ENSOCUG00000000293	ENSMUSG00000026354	226413	MGI:104576	Lct	lactase
ENSOCUG00000000234	ENSMUSG00000039844	107746	MGI:104580	Rapgef1	Rap guanine nucleotide exchange factor (GEF) 1
ENSOCUG00000000931	ENSMUSG00000027669	14696	MGI:104581	Gnb4	guanine nucleotide binding protein (G protein), beta 4
ENSOCUG00000010744	ENSMUSG00000006276	13859	MGI:104582	Eps15l1	epidermal growth factor receptor pathway substrate 15-like 1
ENSOCUG00000004293	ENSMUSG00000028552	13858	MGI:104583	Eps15	epidermal growth factor receptor pathway substrate 15
ENSOCUG00000003663	ENSMUSG00000059430	11468	MGI:104589	Actg2	actin, gamma 2, smooth muscle, enteric
ENSOCUG00000017103	ENSMUSG00000032110	11451	MGI:104590	Acrv1	acrosomal vesicle protein 1
ENSOCUG00000013043	ENSMUSG00000027201	17876	MGI:104592	Myef2	myelin basic protein expression factor 2, repressor
ENSOCUG00000012952	ENSMUSG00000026573	16963	MGI:104593	Xcl1	chemokine (C motif) ligand 1
ENSOCUG00000016598	ENSMUSG00000027611	19124	MGI:104596	Procr	protein C receptor, endothelial
ENSOCUG00000015634	ENSMUSG00000026414	21956	MGI:104597	Tnnt2	troponin T2, cardiac
ENSOCUG00000007531	ENSMUSG00000035597	328110	MGI:104602	Prpf39	pre-mRNA processing factor 39
ENSOCUG00000023006	ENSMUSG00000002059	19376	MGI:104606	Rab34	RAB34, member RAS oncogene family
ENSOCUG00000012455	ENSMUSG00000041390	16543	MGI:104611	Mdfic	MyoD family inhibitor domain containing
ENSOCUG00000022885	ENSMUSG00000014313	12864	MGI:104614	Cox6c	cytochrome c oxidase subunit 6C
ENSOCUG00000024516	ENSMUSG00000044288	12801	MGI:104615	Cnr1	cannabinoid receptor 1 (brain)
ENSOCUG00000025677	ENSMUSG00000035448	12771	MGI:104616	Ccr3	chemokine (C-C motif) receptor 3
ENSOCUG00000003658	ENSMUSG00000025804	12768	MGI:104618	Ccr1	chemokine (C-C motif) receptor 1
ENSOCUG00000009125	ENSMUSG00000036602	216285	MGI:104621	Alx1	ALX homeobox 1
ENSOCUG00000009397	ENSMUSG00000026915	20744	MGI:104626	Strbp	spermatid perinuclear RNA binding protein
ENSOCUG00000014074	ENSMUSG00000026131	13518	MGI:104627	Dst	dystonin
ENSOCUG00000007052	ENSMUSG00000045573	18619	MGI:104629	Penk	preproenkephalin
ENSOCUG00000015789	ENSMUSG00000021266	22375	MGI:104630	Wars	tryptophanyl-tRNA synthetase
ENSOCUG00000015080	ENSMUSG00000019820	22288	MGI:104631	Utrn	utrophin
ENSOCUG00000013054	ENSMUSG00000039159	22214	MGI:104632	Ube2h	ubiquitin-conjugating enzyme E2H
ENSOCUG00000011891	ENSMUSG00000024642	21888	MGI:104633	Tle4	transducin-like enhancer of split 4
ENSOCUG00000023043	ENSMUSG00000032280	21887	MGI:104634	Tle3	transducin-like enhancer of split 3
ENSOCUG00000000531	ENSMUSG00000008305	21885	MGI:104636	Tle1	transducin-like enhancer of split 1
ENSOCUG00000016083	ENSMUSG00000029287	21814	MGI:104637	Tgfbr3	transforming growth factor, beta receptor III
ENSOCUG00000010142	ENSMUSG00000027832	19288	MGI:104641	Ptx3	pentraxin related gene
ENSOCUG00000006582	ENSMUSG00000058908	18780	MGI:104642	Pla2g2a	phospholipase A2, group IIA (platelets, synovial fluid)
ENSOCUG00000007984	ENSMUSG00000014771	18567	MGI:104643	Pdcd2	programmed cell death 2
ENSOCUG00000007203	ENSMUSG00000023206	16169	MGI:104644	Il15ra	interleukin 15 receptor, alpha chain
ENSOCUG00000014221	ENSMUSG00000042423	14123	MGI:104648	Fbrs	fibrosin
ENSOCUG00000007450	ENSMUSG00000030785	12862	MGI:104649	Cox6a2	cytochrome c oxidase subunit 6A2
ENSOCUG00000026372	ENSMUSG00000062585	12802	MGI:104650	Cnr2	cannabinoid receptor 2 (macrophage)
ENSOCUG00000000861	ENSMUSG00000027215	12521	MGI:104651	Cd82	CD82 antigen
ENSOCUG00000014711	ENSMUSG00000028745	12345	MGI:104652	Capzb	capping protein (actin filament) muscle Z-line, beta
ENSOCUG00000016507	ENSMUSG00000019943	67972	MGI:104653	Atp2b1	ATPase, Ca++ transporting, plasma membrane 1
ENSOCUG00000013154	ENSMUSG00000073043	11921	MGI:104654	Atoh1	atonal bHLH transcription factor 1
ENSOCUG00000022916	ENSMUSG00000029288	11698	MGI:104655	Ambn	ameloblastin
ENSOCUG00000013290	ENSMUSG00000014773	13388	MGI:104659	Dll1	delta like canonical Notch ligand 1
ENSOCUG00000012900	ENSMUSG00000032238	19883	MGI:104661	Rora	RAR-related orphan receptor alpha
ENSOCUG00000002183	ENSMUSG00000036986	18854	MGI:104662	Pml	promyelocytic leukemia
ENSOCUG00000010189	ENSMUSG00000059201	16846	MGI:104663	Lep	leptin
ENSOCUG00000000528	ENSMUSG00000068079	21407	MGI:104664	Tcf15	transcription factor 15
ENSOCUG00000008204	ENSMUSG00000026600	20652	MGI:104665	Soat1	sterol O-acyltransferase 1
ENSOCUG00000022126	ENSMUSG00000020330	15366	MGI:104667	Hmmr	hyaluronan mediated motility receptor (RHAMM)
ENSOCUG00000003404	ENSMUSG00000024085	17158	MGI:104669	Man2a1	mannosidase 2, alpha 1
ENSOCUG00000005513	ENSMUSG00000024222	14229	MGI:104670	Fkbp5	FK506 binding protein 5
ENSOCUG00000005315	ENSMUSG00000021359	21418	MGI:104671	Tfap2a	transcription factor AP-2, alpha
ENSOCUG00000025542	ENSMUSG00000025927	21419	MGI:104672	Tfap2b	transcription factor AP-2 beta
ENSOCUG00000002159	ENSMUSG00000028771	19248	MGI:104673	Ptpn12	protein tyrosine phosphatase, non-receptor type 12
ENSOCUG00000012648	ENSMUSG00000008763	17156	MGI:104676	Man1a2	mannosidase, alpha, class 1A, member 2
ENSOCUG00000006700	ENSMUSG00000003746	17155	MGI:104677	Man1a	mannosidase 1, alpha
ENSOCUG00000027275	ENSMUSG00000027800	17112	MGI:104678	Tm4sf1	transmembrane 4 superfamily member 1
ENSOCUG00000010360	ENSMUSG00000073676	15528	MGI:104680	Hspe1	heat shock protein 1 (chaperonin 10)
ENSOCUG00000000792	ENSMUSG00000015766	13860	MGI:104684	Eps8	epidermal growth factor receptor pathway substrate 8
ENSOCUG00000004073	ENSMUSG00000007805	13345	MGI:104685	Twist2	twist basic helix-loop-helix transcription factor 2
ENSOCUG00000000818	ENSMUSG00000006134	12929	MGI:104686	Crkl	v-crk avian sarcoma virus CT10 oncogene homolog-like
ENSOCUG00000007286	ENSMUSG00000067158	12829	MGI:104687	Col4a4	collagen, type IV, alpha 4
ENSOCUG00000000111	ENSMUSG00000079465	12828	MGI:104688	Col4a3	collagen, type IV, alpha 3
ENSOCUG00000024386	ENSMUSG00000007739	12464	MGI:104689	Cct4	chaperonin containing Tcp1, subunit 4 (delta)
ENSOCUG00000016923	ENSMUSG00000051375	75599	MGI:104692	Pcdh1	protocadherin 1
ENSOCUG00000021271	ENSMUSG00000002341	13004	MGI:104694	Ncan	neurocan
ENSOCUG00000017394	ENSMUSG00000000216	20278	MGI:104695	Scnn1g	sodium channel, nonvoltage-gated 1 gamma
ENSOCUG00000008401	ENSMUSG00000030873	20277	MGI:104696	Scnn1b	sodium channel, nonvoltage-gated 1 beta
ENSOCUG00000024381	ENSMUSG00000037974	17833	MGI:104697	Muc5ac	mucin 5, subtypes A and C, tracheobronchial/gastric
ENSOCUG00000022994	ENSMUSG00000093639	233187	MGI:104698	Lim2	lens intrinsic membrane protein 2
ENSOCUG00000000137	ENSMUSG00000001416	12462	MGI:104708	Cct3	chaperonin containing Tcp1, subunit 3 (gamma)
ENSOCUG00000002654	ENSMUSG00000036647	233670	MGI:104713	Olfr6	olfactory receptor 6
ENSOCUG00000011864	ENSMUSG00000036658	218066	MGI:104715	Olfr11	olfactory receptor 11
ENSOCUG00000014583	ENSMUSG00000067786	18111	MGI:104716	Nnat	neuronatin
ENSOCUG00000001842	ENSMUSG00000020160	17268	MGI:104717	Meis1	Meis homeobox 1
ENSOCUG00000011515	ENSMUSG00000054008	15531	MGI:104719	Ndst1	N-deacetylase/N-sulfotransferase (heparan glucosaminyl) 1
ENSOCUG00000011843	ENSMUSG00000031891	15484	MGI:104720	Hsd11b2	hydroxysteroid 11-beta dehydrogenase 2
ENSOCUG00000000732	ENSMUSG00000021974	14180	MGI:104723	Fgf9	fibroblast growth factor 9
ENSOCUG00000026161	ENSMUSG00000018861	14149	MGI:104724	Fdxr	ferredoxin reductase
ENSOCUG00000025615	ENSMUSG00000025867	12890	MGI:104726	Cplx2	complexin 2
ENSOCUG00000008284	ENSMUSG00000021501	12328	MGI:104728	Caml	calcium modulating ligand
ENSOCUG00000017563	ENSMUSG00000018428	11640	MGI:104729	Akap1	A kinase (PRKA) anchor protein 1
ENSOCUG00000005475	ENSMUSG00000031554	11499	MGI:104730	Adam5	a disintegrin and metallopeptidase domain 5
ENSOCUG00000001807	ENSMUSG00000011831	14020	MGI:104736	Evi5	ecotropic viral integration site 5
ENSOCUG00000012306	ENSMUSG00000073802	12579	MGI:104737	Cdkn2b	cyclin dependent kinase inhibitor 2B
ENSOCUG00000009353	ENSMUSG00000022383	19013	MGI:104740	Ppara	peroxisome proliferator activated receptor alpha
ENSOCUG00000015642	ENSMUSG00000021025	18035	MGI:104741	Nfkbia	nuclear factor of kappa light polypeptide gene enhancer in B cells inhibitor, alpha
ENSOCUG00000024206	ENSMUSG00000026824	16519	MGI:104742	Kcnj3	potassium inwardly-rectifying channel, subfamily J, member 3
ENSOCUG00000010404	ENSMUSG00000044216	16520	MGI:104743	Kcnj4	potassium inwardly-rectifying channel, subfamily J, member 4
ENSOCUG00000010416	ENSMUSG00000041695	16518	MGI:104744	Kcnj2	potassium inwardly-rectifying channel, subfamily J, member 2
ENSOCUG00000015254	ENSMUSG00000000632	20370	MGI:104745	Sez6	seizure related gene 6
ENSOCUG00000021115	ENSMUSG00000027499	18767	MGI:104747	Pkia	protein kinase inhibitor, alpha
ENSOCUG00000012339	ENSMUSG00000002265	18616	MGI:104748	Peg3	paternally expressed 3
ENSOCUG00000010199	ENSMUSG00000058755	18413	MGI:104749	Osm	oncostatin M
ENSOCUG00000014768	ENSMUSG00000020598	319504	MGI:104750	Nrcam	neuronal cell adhesion molecule
ENSOCUG00000024218	ENSMUSG00000030595	18036	MGI:104752	Nfkbib	nuclear factor of kappa light polypeptide gene enhancer in B cells inhibitor, beta
ENSOCUG00000015363	ENSMUSG00000026442	269116	MGI:104753	Nfasc	neurofascin
ENSOCUG00000015565	ENSMUSG00000032034	16521	MGI:104755	Kcnj5	potassium inwardly-rectifying channel, subfamily J, member 5
ENSOCUG00000016902	ENSMUSG00000029710	13846	MGI:104757	Ephb4	Eph receptor B4
ENSOCUG00000024965	ENSMUSG00000017165	14459	MGI:104768	Gast	gastrin
ENSOCUG00000000611	ENSMUSG00000001555	14230	MGI:104769	Fkbp10	FK506 binding protein 10
ENSOCUG00000012637	ENSMUSG00000005958	13845	MGI:104770	Ephb3	Eph receptor B3
ENSOCUG00000009790	ENSMUSG00000062209	13869	MGI:104771	Erbb4	erb-b2 receptor tyrosine kinase 4
ENSOCUG00000000998	ENSMUSG00000025358	12566	MGI:104772	Cdk2	cyclin-dependent kinase 2
ENSOCUG00000000775	ENSMUSG00000045875	11549	MGI:104773	Adra1a	adrenergic receptor, alpha 1a
ENSOCUG00000005721	ENSMUSG00000050541	11548	MGI:104774	Adra1b	adrenergic receptor, alpha 1b
ENSOCUG00000001693	ENSMUSG00000022672	19090	MGI:104779	Prkdc	protein kinase, DNA activated, catalytic polypeptide
ENSOCUG00000012419	ENSMUSG00000043301	16522	MGI:104781	Kcnj6	potassium inwardly-rectifying channel, subfamily J, member 6
ENSOCUG00000015360	ENSMUSG00000046876	20238	MGI:104783	Atxn1	ataxin 1
ENSOCUG00000024606	ENSMUSG00000033577	17920	MGI:104785	Myo6	myosin VI
ENSOCUG00000011646	ENSMUSG00000031907	22751	MGI:104786	Zfp90	zinc finger protein 90
ENSOCUG00000016949	ENSMUSG00000055027	12180	MGI:104790	Smyd1	SET and MYND domain containing 1
ENSOCUG00000003754	ENSMUSG00000006586	12395	MGI:104793	Runx1t1	runt-related transcription factor 1; translocated to, 1 (cyclin D-related)
ENSOCUG00000006703	ENSMUSG00000024399	16994	MGI:104796	Ltb	lymphotoxin B
ENSOCUG00000006694	ENSMUSG00000024402	16992	MGI:104797	Lta	lymphotoxin A
ENSOCUG00000006698	ENSMUSG00000024401	21926	MGI:104798	Tnf	tumor necrosis factor
ENSOCUG00000017688	ENSMUSG00000013698	18611	MGI:104799	Pea15a	phosphoprotein enriched in astrocytes 15A
ENSOCUG00000003036	ENSMUSG00000001942	22619	MGI:104803	Siae	sialic acid acetylesterase
ENSOCUG00000001427	ENSMUSG00000008333	20639	MGI:104805	Snrpb2	U2 small nuclear ribonucleoprotein B
ENSOCUG00000006041	ENSMUSG00000016382	102866	MGI:104807	Pls3	plastin 3 (T-isoform)
ENSOCUG00000017943	ENSMUSG00000021998	18826	MGI:104808	Lcp1	lymphocyte cytosolic protein 1
ENSOCUG00000017700	ENSMUSG00000049493	102502	MGI:104809	Pls1	plastin 1 (I-isoform)
ENSOCUG00000015471	ENSMUSG00000028577	18786	MGI:104810	Plaa	phospholipase A2, activating protein
ENSOCUG00000006262	ENSMUSG00000022205	20024	MGI:104811	Sub1	SUB1 homolog (S. cerevisiae)
ENSOCUG00000021687	ENSMUSG00000043605	18310	MGI:104812	Olfr13	olfactory receptor 13
ENSOCUG00000009755	ENSMUSG00000038518	16468	MGI:104813	Jarid2	jumonji, AT rich interactive domain 2
ENSOCUG00000016451	ENSMUSG00000003541	15937	MGI:104814	Ier3	immediate early response 3
ENSOCUG00000026036	ENSMUSG00000053560	15936	MGI:104815	Ier2	immediate early response 2
ENSOCUG00000002943	ENSMUSG00000015165	15388	MGI:104816	Hnrnpl	heterogeneous nuclear ribonucleoprotein L
ENSOCUG00000026859	ENSMUSG00000004980	53379	MGI:104819	Hnrnpa2b1	heterogeneous nuclear ribonucleoprotein A2/B1
ENSOCUG00000014789	ENSMUSG00000020610	100503496	MGI:104837	Amz2	archaelysin family metallopeptidase 2
ENSOCUG00000010087	ENSMUSG00000021990	219140	MGI:104838	Spata13	spermatogenesis associated 13
ENSOCUG00000003580	ENSMUSG00000022742	12892	MGI:104841	Cpox	coproporphyrinogen oxidase
ENSOCUG00000011345	ENSMUSG00000033983	12812	MGI:104842	Coil	coilin
ENSOCUG00000023239	ENSMUSG00000000562	11542	MGI:104847	Adora3	adenosine A3 receptor
ENSOCUG00000000006	ENSMUSG00000026102	16329	MGI:104848	Inpp1	inositol polyphosphate-1-phosphatase
ENSOCUG00000023887	ENSMUSG00000026399	13136	MGI:104850	Cd55	CD55 molecule, decay accelerating factor for complement
ENSOCUG00000009363	ENSMUSG00000022528	15205	MGI:104853	Hes1	hes family bHLH transcription factor 1
ENSOCUG00000005385	ENSMUSG00000024695	109910	MGI:104854	Zfp91	zinc finger protein 91
ENSOCUG00000022907	ENSMUSG00000028150	19885	MGI:104856	Rorc	RAR-related orphan receptor gamma
ENSOCUG00000003850	ENSMUSG00000036858	19208	MGI:104857	Ptcra	pre T cell antigen receptor alpha
ENSOCUG00000023518	ENSMUSG00000027680	14359	MGI:104860	Fxr1	fragile X mental retardation gene 1, autosomal homolog
ENSOCUG00000003963	ENSMUSG00000030268	12035	MGI:104861	Bcat1	branched chain aminotransferase 1, cytosolic
ENSOCUG00000001661	ENSMUSG00000025823	12304	MGI:104864	Pdia4	protein disulfide isomerase associated 4
ENSOCUG00000013145	ENSMUSG00000025216	16814	MGI:104867	Lbx1	ladybird homeobox 1
ENSOCUG00000001023	ENSMUSG00000014956	19046	MGI:104871	Ppp1cb	protein phosphatase 1 catalytic subunit beta
ENSOCUG00000009275	ENSMUSG00000004455	19047	MGI:104872	Ppp1cc	protein phosphatase 1 catalytic subunit gamma
ENSOCUG00000002031	ENSMUSG00000031521	11593	MGI:104873	Aga	aspartylglucosaminidase
ENSOCUG00000001292	ENSMUSG00000030339	17000	MGI:104875	Ltbr	lymphotoxin B receptor
ENSOCUG00000028151	ENSMUSG00000028946	15207	MGI:104877	Hes3	hes family bHLH transcription factor 3
ENSOCUG00000017419	ENSMUSG00000020612	19084	MGI:104878	Prkar1a	protein kinase, cAMP dependent regulatory, type I, alpha
ENSOCUG00000008079	ENSMUSG00000026285	18566	MGI:104879	Pdcd1	programmed cell death 1
ENSOCUG00000011848	ENSMUSG00000018286	19175	MGI:104880	Psmb6	proteasome (prosome, macropain) subunit, beta type 6
ENSOCUG00000010316	ENSMUSG00000060073	19167	MGI:104883	Psma3	proteasome (prosome, macropain) subunit, alpha type 3
ENSOCUG00000007973	ENSMUSG00000014769	19170	MGI:104884	Psmb1	proteasome (prosome, macropain) subunit, beta type 1
ENSOCUG00000012092	ENSMUSG00000015671	19166	MGI:104885	Psma2	proteasome (prosome, macropain) subunit, alpha type 2
ENSOCUG00000016836	ENSMUSG00000004344	14780	MGI:104886	Gpx5	glutathione peroxidase 5
ENSOCUG00000005938	ENSMUSG00000063856	14775	MGI:104887	Gpx1	glutathione peroxidase 1
ENSOCUG00000011063	ENSMUSG00000009741	22221	MGI:104889	Ubp1	upstream binding protein 1
ENSOCUG00000023692	ENSMUSG00000060126	22070	MGI:104890	Tpt1	tumor protein, translationally-controlled 1
ENSOCUG00000024603	ENSMUSG00000029538	108014	MGI:104896	Srsf9	serine/arginine-rich splicing factor 9
ENSOCUG00000001776	ENSMUSG00000029249	19712	MGI:104897	Rest	RE1-silencing transcription factor
ENSOCUG00000024010	ENSMUSG00000027346	74182	MGI:104898	Gpcpd1	glycerophosphocholine phosphodiesterase 1
ENSOCUG00000002718	ENSMUSG00000025979	19070	MGI:104899	Mob4	MOB family member 4, phocein
ENSOCUG00000004787	ENSMUSG00000040667	19069	MGI:104900	Nup88	nucleoporin 88
ENSOCUG00000015005	ENSMUSG00000031119	14735	MGI:104902	Gpc4	glypican 4
ENSOCUG00000001752	ENSMUSG00000055653	14734	MGI:104903	Gpc3	glypican 3
ENSOCUG00000008758	ENSMUSG00000030796	21677	MGI:104904	Tead2	TEA domain family member 2
ENSOCUG00000007668	ENSMUSG00000059456	19229	MGI:104908	Ptk2b	PTK2 protein tyrosine kinase 2 beta
ENSOCUG00000025891	ENSMUSG00000020211	20222	MGI:104912	Sf3a2	splicing factor 3a, subunit 2
ENSOCUG00000010076	ENSMUSG00000058835	11308	MGI:104913	Abi1	abl-interactor 1
ENSOCUG00000011484	ENSMUSG00000021281	21928	MGI:104960	Tnfaip2	tumor necrosis factor, alpha-induced protein 2
ENSOCUG00000007774	ENSMUSG00000017615	21927	MGI:104961	Tnfaip1	tumor necrosis factor, alpha-induced protein 1 (endothelial)
ENSOCUG00000009958	ENSMUSG00000036437	18166	MGI:104963	Npy1r	neuropeptide Y receptor Y1
ENSOCUG00000023993	ENSMUSG00000042554	22789	MGI:104965	Zp3r	zona pellucida 3 receptor
ENSOCUG00000004621	ENSMUSG00000058420	110058	MGI:104966	Syt17	synaptotagmin XVII
ENSOCUG00000003425	ENSMUSG00000003316	20340	MGI:104967	Glg1	golgi apparatus protein 1
ENSOCUG00000002403	ENSMUSG00000062729	19044	MGI:104968	Ppox	protoporphyrinogen oxidase
ENSOCUG00000020902	ENSMUSG00000032802	76650	MGI:104971	Srxn1	sulfiredoxin 1 homolog (S. cerevisiae)
ENSOCUG00000004870	ENSMUSG00000022514	16180	MGI:104975	Il1rap	interleukin 1 receptor accessory protein
ENSOCUG00000005849	ENSMUSG00000032097	13209	MGI:104976	Ddx6	DEAD (Asp-Glu-Ala-Asp) box polypeptide 6
ENSOCUG00000000440	ENSMUSG00000039519	13123	MGI:104978	Cyp7b1	cytochrome P450, family 7, subfamily b, polypeptide 1
ENSOCUG00000017036	ENSMUSG00000056216	12611	MGI:104982	Cebpg	CCAAT/enhancer binding protein (C/EBP), gamma
ENSOCUG00000022519	ENSMUSG00000021485	17121	MGI:104987	Mxd3	Max dimerization protein 3
ENSOCUG00000012805	ENSMUSG00000032350	14629	MGI:104990	Gclc	glutamate-cysteine ligase, catalytic subunit
ENSOCUG00000005063	ENSMUSG00000037235	17122	MGI:104991	Mxd4	Max dimerization protein 4
ENSOCUG00000022269	ENSMUSG00000029343	12960	MGI:104992	Crybb1	crystallin, beta B1
ENSOCUG00000017347	ENSMUSG00000057722	16847	MGI:104993	Lepr	leptin receptor
ENSOCUG00000013796	ENSMUSG00000028124	14630	MGI:104995	Gclm	glutamate-cysteine ligase, modifier subunit
ENSOCUG00000026305	ENSMUSG00000020719	13207	MGI:105037	Ddx5	DEAD (Asp-Glu-Ala-Asp) box polypeptide 5
ENSOCUG00000003877	ENSMUSG00000019256	11622	MGI:105043	Ahr	aryl-hydrocarbon receptor
ENSOCUG00000005633	ENSMUSG00000026803	22130	MGI:105044	Ttf1	transcription termination factor, RNA polymerase I
ENSOCUG00000026273	ENSMUSG00000021091	20716	MGI:105045	Serpina3n	serine (or cysteine) peptidase inhibitor, clade A, member 3N
ENSOCUG00000004329	ENSMUSG00000020708	19184	MGI:105047	Psmc5	protease (prosome, macropain) 26S subunit, ATPase 5
ENSOCUG00000010828	ENSMUSG00000027765	18441	MGI:105049	P2ry1	purinergic receptor P2Y, G-protein coupled 1
ENSOCUG00000013736	ENSMUSG00000029267	17765	MGI:105050	Mtf2	metal response element binding transcription factor 2
ENSOCUG00000007048	ENSMUSG00000018334	16706	MGI:105051	Ksr1	kinase suppressor of ras 1
ENSOCUG00000013687	ENSMUSG00000017057	16164	MGI:105052	Il13ra1	interleukin 13 receptor, alpha 1
ENSOCUG00000014773	ENSMUSG00000029657	15505	MGI:105053	Hsph1	heat shock 105kDa/110kDa protein 1
ENSOCUG00000016823	ENSMUSG00000020173	12808	MGI:105056	Cobl	cordon-bleu WH2 repeat
ENSOCUG00000010192	ENSMUSG00000031871	12562	MGI:105057	Cdh5	cadherin 5
ENSOCUG00000002688	ENSMUSG00000030730	11937	MGI:105058	Atp2a1	ATPase, Ca++ transporting, cardiac muscle, fast twitch 1
ENSOCUG00000015393	ENSMUSG00000031165	22376	MGI:105059	Was	Wiskott-Aldrich syndrome
ENSOCUG00000005238	ENSMUSG00000022861	110197	MGI:105060	Dgkg	diacylglycerol kinase, gamma
ENSOCUG00000007065	ENSMUSG00000022843	12724	MGI:105061	Clcn2	chloride channel, voltage-sensitive 2
ENSOCUG00000004151	ENSMUSG00000023047	110542	MGI:105062	Amhr2	anti-Mullerian hormone type 2 receptor
ENSOCUG00000011055	ENSMUSG00000036123	105243	MGI:105064	Slc9a3	solute carrier family 9 (sodium/hydrogen exchanger), member 3
ENSOCUG00000029699	ENSMUSG00000034789	19336	MGI:105065	Rab24	RAB24, member RAS oncogene family
ENSOCUG00000029308	ENSMUSG00000020671	19325	MGI:105066	Rab10	RAB10, member RAS oncogene family
ENSOCUG00000001645	ENSMUSG00000079477	19349	MGI:105068	Rab7	RAB7, member RAS oncogene family
ENSOCUG00000006816	ENSMUSG00000019478	19341	MGI:105069	Rab4a	RAB4A, member RAS oncogene family
ENSOCUG00000006680	ENSMUSG00000053291	19342	MGI:105071	Rab4b	RAB4B, member RAS oncogene family
ENSOCUG00000004414	ENSMUSG00000027519	19334	MGI:105072	Rab22a	RAB22A, member RAS oncogene family
ENSOCUG00000010424	ENSMUSG00000026418	21952	MGI:105073	Tnni1	troponin I, skeletal, slow 1
ENSOCUG00000006075	ENSMUSG00000026065	110895	MGI:105074	Slc9a4	solute carrier family 9 (sodium/hydrogen exchanger), member 4
ENSOCUG00000004890	ENSMUSG00000026062	226999	MGI:105075	Slc9a2	solute carrier family 9 (sodium/hydrogen exchanger), member 2
ENSOCUG00000022009	ENSMUSG00000019301	15485	MGI:105077	Hsd17b1	hydroxysteroid (17-beta) dehydrogenase 1
ENSOCUG00000008764	ENSMUSG00000056429	22134	MGI:105080	Tgoln1	trans-golgi network protein
ENSOCUG00000008491	ENSMUSG00000029552	21753	MGI:105081	Tes	testis derived transcript
ENSOCUG00000009083	ENSMUSG00000021427	107513	MGI:105082	Ssr1	signal sequence receptor, alpha
ENSOCUG00000022202	ENSMUSG00000024935	20510	MGI:105083	Slc1a1	solute carrier family 1 (neuronal/epithelial high affinity glutamate transporter, system Xag), member 1
ENSOCUG00000007174	ENSMUSG00000023927	20230	MGI:105084	Satb1	special AT-rich sequence binding protein 1
ENSOCUG00000006354	ENSMUSG00000031666	19651	MGI:105085	Rbl2	RB transcriptional corepressor like 2
ENSOCUG00000012566	ENSMUSG00000032053	18985	MGI:105086	Pou2af1	POU domain, class 2, associating factor 1
ENSOCUG00000027183	ENSMUSG00000020902	18208	MGI:105088	Ntn1	netrin 1
ENSOCUG00000010866	ENSMUSG00000024507	15488	MGI:105089	Hsd17b4	hydroxysteroid (17-beta) dehydrogenase 4
ENSOCUG00000000757	ENSMUSG00000039728	104245	MGI:105090	Slc6a5	solute carrier family 6 (neurotransmitter transporter, glycine), member 5
ENSOCUG00000012890	ENSMUSG00000027552	13559	MGI:105091	E2f5	E2F transcription factor 5
ENSOCUG00000009463	ENSMUSG00000024256	11516	MGI:105094	Adcyap1	adenylate cyclase activating polypeptide 1
ENSOCUG00000026354	ENSMUSG00000004791	18654	MGI:105095	Pgf	placental growth factor
ENSOCUG00000022857	ENSMUSG00000001300	13642	MGI:105097	Efnb2	ephrin B2
ENSOCUG00000017465	ENSMUSG00000025326	22215	MGI:105098	Ube3a	ubiquitin protein ligase E3A
ENSOCUG00000014213	ENSMUSG00000034101	12388	MGI:105100	Ctnnd1	catenin (cadherin associated protein), delta 1
ENSOCUG00000013929	ENSMUSG00000032860	18442	MGI:105107	P2ry2	purinergic receptor P2Y, G-protein coupled 2
ENSOCUG00000015494	ENSMUSG00000021068	18080	MGI:105108	Nin	ninein
ENSOCUG00000006236	ENSMUSG00000074881	17147	MGI:105109	Mageb3	melanoma antigen, family B, 3
ENSOCUG00000022355	ENSMUSG00000044533	16898	MGI:105110	Rps2	ribosomal protein S2
ENSOCUG00000023096	ENSMUSG00000030895	15458	MGI:105112	Hpx	hemopexin
ENSOCUG00000005688	ENSMUSG00000042340	13019	MGI:105115	Ctf1	cardiotrophin 1
ENSOCUG00000009664	ENSMUSG00000042282	245650	MGI:105119	Gucy2f	guanylate cyclase 2f
ENSOCUG00000007999	ENSMUSG00000024190	19252	MGI:105120	Dusp1	dual specificity phosphatase 1
ENSOCUG00000023089	ENSMUSG00000015461	12915	MGI:105121	Atf6b	activating transcription factor 6 beta
ENSOCUG00000004872	ENSMUSG00000020890	14919	MGI:105123	Gucy2e	guanylate cyclase 2e
ENSOCUG00000014677	ENSMUSG00000032116	16430	MGI:105124	Stt3a	STT3, subunit of the oligosaccharyltransferase complex, homolog A (S. cerevisiae)
ENSOCUG00000000604	ENSMUSG00000035530	20918	MGI:105125	Eif1	eukaryotic translation initiation factor 1
ENSOCUG00000024418	ENSMUSG00000003813	19358	MGI:105126	Rad23a	RAD23 homolog A, nucleotide excision repair protein
ENSOCUG00000007316	ENSMUSG00000028426	19359	MGI:105128	Rad23b	RAD23 homolog B, nucleotide excision repair protein
ENSOCUG00000016354	ENSMUSG00000027947	16194	MGI:105304	Il6ra	interleukin 6 receptor, alpha
ENSOCUG00000009144	ENSMUSG00000001918	20514	MGI:105305	Slc1a5	solute carrier family 1 (neutral amino acid transporter), member 5
ENSOCUG00000013307	ENSMUSG00000019173	19345	MGI:105306	Rab5c	RAB5C, member RAS oncogene family
ENSOCUG00000001034	ENSMUSG00000038764	545622	MGI:105307	Ptpn3	protein tyrosine phosphatase, non-receptor type 3
ENSOCUG00000014172	ENSMUSG00000045731	18155	MGI:105308	Pnoc	prepronociceptin
ENSOCUG00000021587	ENSMUSG00000022203	13644	MGI:105311	Efs	embryonal Fyn-associated substrate
ENSOCUG00000023469	ENSMUSG00000061388	12992	MGI:105312	Csn1s2b	casein alpha s2-like B
ENSOCUG00000016324	ENSMUSG00000029516	12704	MGI:105313	Cit	citron
ENSOCUG00000000329	ENSMUSG00000030748	16190	MGI:105367	Il4ra	interleukin 4 receptor, alpha
ENSOCUG00000008021	ENSMUSG00000018666	12412	MGI:105369	Cbx1	chromobox 1
ENSOCUG00000002336	ENSMUSG00000029082	12182	MGI:105370	Bst1	bone marrow stromal cell antigen 1
ENSOCUG00000009843	ENSMUSG00000056222	20745	MGI:105371	Spock1	sparc/osteonectin, cwcv and kazal-like domains proteoglycan 1
ENSOCUG00000024345	ENSMUSG00000037014	20608	MGI:105372	Sstr4	somatostatin receptor 4
ENSOCUG00000002973	ENSMUSG00000021466	19206	MGI:105373	Ptch1	patched 1
ENSOCUG00000014188	ENSMUSG00000048337	19065	MGI:105374	Npy4r	neuropeptide Y receptor Y4
ENSOCUG00000013380	ENSMUSG00000031555	11502	MGI:105376	Adam9	a disintegrin and metallopeptidase domain 9 (meltrin gamma)
ENSOCUG00000001235	ENSMUSG00000011256	11492	MGI:105377	Adam19	a disintegrin and metallopeptidase domain 19 (meltrin beta)
ENSOCUG00000008781	ENSMUSG00000054555	11489	MGI:105378	Adam12	a disintegrin and metallopeptidase domain 12 (meltrin alpha)
ENSOCUG00000015924	ENSMUSG00000002870	17216	MGI:105380	Mcm2	minichromosome maintenance complex component 2
ENSOCUG00000022518	ENSMUSG00000032518	16785	MGI:105381	Rpsa	ribosomal protein SA
ENSOCUG00000027331	ENSMUSG00000015647	16776	MGI:105382	Lama5	laminin, alpha 5
ENSOCUG00000016476	ENSMUSG00000026070	16182	MGI:105383	Il18r1	interleukin 18 receptor 1
ENSOCUG00000015533	ENSMUSG00000015656	15481	MGI:105384	Hspa8	heat shock protein 8
ENSOCUG00000014244	ENSMUSG00000000340	13171	MGI:105386	Dbt	dihydrolipoamide branched chain transacylase E2
ENSOCUG00000022727	ENSMUSG00000096472	12581	MGI:105387	Cdkn2d	cyclin dependent kinase inhibitor 2D
ENSOCUG00000008385	ENSMUSG00000028551	12580	MGI:105388	Cdkn2c	cyclin dependent kinase inhibitor 2C
ENSOCUG00000004989	ENSMUSG00000022429	13404	MGI:105393	Dmc1	DNA meiotic recombinase 1
ENSOCUG00000015275	ENSMUSG00000001248	52857	MGI:105490	Gramd1a	GRAM domain containing 1A
ENSOCUG00000024358	ENSMUSG00000030682	52858	MGI:105491	Cdipt	CDP-diacylglycerol--inositol 3-phosphatidyltransferase (phosphatidylinositol synthase)
ENSOCUG00000010918	ENSMUSG00000000127	14158	MGI:105917	Fer	fer (fms/fps related) protein kinase
ENSOCUG00000024415	ENSMUSG00000000740	270106	MGI:105922	Rpl13	ribosomal protein L13
ENSOCUG00000001250	ENSMUSG00000031616	13617	MGI:105923	Ednra	endothelin receptor type A
ENSOCUG00000000148	ENSMUSG00000033022	12583	MGI:105925	Cdo1	cysteine dioxygenase 1, cytosolic
ENSOCUG00000012200	ENSMUSG00000017831	271457	MGI:105926	Rab5a	RAB5A, member RAS oncogene family
ENSOCUG00000016463	ENSMUSG00000027855	20957	MGI:105931	Sycp1	synaptonemal complex protein 1
ENSOCUG00000007380	ENSMUSG00000025405	16325	MGI:105932	Inhbc	inhibin beta-C
ENSOCUG00000002977	ENSMUSG00000064181	216363	MGI:105933	Rab3ip	RAB3A interacting protein
ENSOCUG00000013895	ENSMUSG00000000711	19344	MGI:105938	Rab5b	RAB5B, member RAS oncogene family
ENSOCUG00000025840	ENSMUSG00000031387	19703	MGI:105940	Renbp	renin binding protein
ENSOCUG00000012660	ENSMUSG00000031402	17524	MGI:105941	Mpp1	membrane protein, palmitoylated
ENSOCUG00000001113	ENSMUSG00000031386	15161	MGI:105942	Hcfc1	host cell factor C1
ENSOCUG00000015919	ENSMUSG00000008682	110954	MGI:105943	Rpl10	ribosomal protein L10
ENSOCUG00000010528	ENSMUSG00000024992	110855	MGI:105956	Pde6c	phosphodiesterase 6C, cGMP specific, cone, alpha prime
ENSOCUG00000026908	ENSMUSG00000025488	12869	MGI:105958	Cox8b	cytochrome c oxidase subunit 8B
ENSOCUG00000017388	ENSMUSG00000035885	12868	MGI:105959	Cox8a	cytochrome c oxidase subunit 8A
ENSOCUG00000007530	ENSMUSG00000053841	109658	MGI:105968	Txlna	taxilin alpha
ENSOCUG00000029682	ENSMUSG00000090231	14962	MGI:105975	Cfb	complement factor B
ENSOCUG00000007669	ENSMUSG00000034593	17918	MGI:105976	Myo5a	myosin VA
ENSOCUG00000007866	ENSMUSG00000031400	14381	MGI:105979	G6pdx	glucose-6-phosphate dehydrogenase X-linked
ENSOCUG00000009395	ENSMUSG00000055022	12805	MGI:105980	Cntn1	contactin 1
ENSOCUG00000025236	ENSMUSG00000032484	18054	MGI:105983	Ngp	neutrophilic granule protein
ENSOCUG00000027734	ENSMUSG00000031552	13524	MGI:105986	Adam18	a disintegrin and metallopeptidase domain 18
ENSOCUG00000004176	ENSMUSG00000014725	13522	MGI:105988	Adam28	a disintegrin and metallopeptidase domain 28
ENSOCUG00000015904	ENSMUSG00000021957	21881	MGI:105992	Tkt	transketolase
ENSOCUG00000017760	ENSMUSG00000027712	11747	MGI:106008	Anxa5	annexin A5
ENSOCUG00000013134	ENSMUSG00000030283	20449	MGI:106011	St8sia1	ST8 alpha-N-acetyl-neuraminide alpha-2,8-sialyltransferase 1
ENSOCUG00000023919	ENSMUSG00000032085	21345	MGI:106012	Tagln	transgelin
ENSOCUG00000016776	ENSMUSG00000032902	20501	MGI:106013	Slc16a1	solute carrier family 16 (monocarboxylic acid transporters), member 1
ENSOCUG00000006418	ENSMUSG00000028851	18221	MGI:106014	Nudc	nudC nuclear distribution protein
ENSOCUG00000027189	ENSMUSG00000024248	20463	MGI:106015	Cox7a2l	cytochrome c oxidase subunit 7A2 like
ENSOCUG00000008940	ENSMUSG00000022858	20462	MGI:106016	Tra2b	transformer 2 beta
ENSOCUG00000007922	ENSMUSG00000040710	20452	MGI:106018	St8sia4	ST8 alpha-N-acetyl-neuraminide alpha-2,8-sialyltransferase 4
ENSOCUG00000011662	ENSMUSG00000056812	20451	MGI:106019	St8sia3	ST8 alpha-N-acetyl-neuraminide alpha-2,8-sialyltransferase 3
ENSOCUG00000002903	ENSMUSG00000025789	20450	MGI:106020	St8sia2	ST8 alpha-N-acetyl-neuraminide alpha-2,8-sialyltransferase 2
ENSOCUG00000024023	ENSMUSG00000024128	20234	MGI:106021	Sbp	spermine binding protein
ENSOCUG00000006538	ENSMUSG00000060938	19941	MGI:106022	Rpl26	ribosomal protein L26
ENSOCUG00000023136	ENSMUSG00000055523	73707	MGI:106025	Gucy2g	guanylate cyclase 2g
ENSOCUG00000010996	ENSMUSG00000028640	21420	MGI:106032	Tfap2c	transcription factor AP-2, gamma
ENSOCUG00000029149	ENSMUSG00000034460	20474	MGI:106034	Six4	sine oculis-related homeobox 4
ENSOCUG00000005133	ENSMUSG00000031004	17345	MGI:106035	Mki67	antigen identified by monoclonal antibody Ki 67
ENSOCUG00000013571	ENSMUSG00000036295	16981	MGI:106036	Lrrn3	leucine rich repeat protein 3, neuronal
ENSOCUG00000023697	ENSMUSG00000034648	16979	MGI:106038	Lrrn1	leucine rich repeat protein 1, neuronal
ENSOCUG00000003773	ENSMUSG00000024302	13527	MGI:106039	Dtna	dystrobrevin alpha
ENSOCUG00000004549	ENSMUSG00000001467	13121	MGI:106040	Cyp51	cytochrome P450, family 51
ENSOCUG00000006231	ENSMUSG00000021178	19179	MGI:106054	Psmc1	protease (prosome, macropain) 26S subunit, ATPase 1
ENSOCUG00000017104	ENSMUSG00000029147	14208	MGI:106065	Ppm1g	protein phosphatase 1G (formerly 2C), magnesium-dependent, gamma isoform
ENSOCUG00000017831	ENSMUSG00000056529	19204	MGI:106066	Ptafr	platelet-activating factor receptor
ENSOCUG00000005655	ENSMUSG00000028312	14211	MGI:106067	Smc2	structural maintenance of chromosomes 2
ENSOCUG00000012283	ENSMUSG00000028240	13122	MGI:106091	Cyp7a1	cytochrome P450, family 7, subfamily a, polypeptide 1
ENSOCUG00000000769	ENSMUSG00000032314	110842	MGI:106092	Etfa	electron transferring flavoprotein, alpha polypeptide
ENSOCUG00000002295	ENSMUSG00000061315	17938	MGI:106095	Naca	nascent polypeptide-associated complex alpha polypeptide
ENSOCUG00000000978	ENSMUSG00000032334	16949	MGI:106096	Loxl1	lysyl oxidase-like 1
ENSOCUG00000024439	ENSMUSG00000004610	110826	MGI:106098	Etfb	electron transferring flavoprotein, beta polypeptide
ENSOCUG00000006594	ENSMUSG00000027809	66841	MGI:106100	Etfdh	electron transferring flavoprotein, dehydrogenase
ENSOCUG00000015412	ENSMUSG00000021448	20418	MGI:106179	Shc3	src homology 2 domain-containing transforming protein C3
ENSOCUG00000012076	ENSMUSG00000040463	18432	MGI:106181	Mybbp1a	MYB binding protein (P160) 1a
ENSOCUG00000026852	ENSMUSG00000059043	18312	MGI:106182	Olfr15	olfactory receptor 15
ENSOCUG00000004964	ENSMUSG00000021638	18260	MGI:106183	Ocln	occludin
ENSOCUG00000011117	ENSMUSG00000057113	18148	MGI:106184	Npm1	nucleophosmin 1
ENSOCUG00000003660	ENSMUSG00000049103	12772	MGI:106185	Ccr2	chemokine (C-C motif) receptor 2
ENSOCUG00000005066	ENSMUSG00000033318	14872	MGI:106188	Gstt2	glutathione S-transferase, theta 2
ENSOCUG00000023948	ENSMUSG00000000861	14025	MGI:106190	Bcl11a	B cell CLL/lymphoma 11A (zinc finger protein)
ENSOCUG00000015317	ENSMUSG00000032180	17083	MGI:106201	Tmed1	transmembrane p24 trafficking protein 1
ENSOCUG00000001659	ENSMUSG00000024503	20730	MGI:106202	Spink1	serine peptidase inhibitor, Kazal type 1
ENSOCUG00000013509	ENSMUSG00000027660	20482	MGI:106203	Skil	SKI-like
ENSOCUG00000004579	ENSMUSG00000025810	18186	MGI:106206	Nrp1	neuropilin 1
ENSOCUG00000014274	ENSMUSG00000021103	17420	MGI:106207	Mnat1	menage a trois 1
ENSOCUG00000026731	ENSMUSG00000025001	15201	MGI:106209	Hells	helicase, lymphoid specific
ENSOCUG00000013488	ENSMUSG00000047517	12945	MGI:106210	Dmbt1	deleted in malignant brain tumors 1
ENSOCUG00000003073	ENSMUSG00000006699	12540	MGI:106211	Cdc42	cell division cycle 42
ENSOCUG00000005123	ENSMUSG00000031492	108043	MGI:106212	Chrnb3	cholinergic receptor, nicotinic, beta polypeptide 3
ENSOCUG00000009516	ENSMUSG00000031491	11440	MGI:106213	Chrna6	cholinergic receptor, nicotinic, alpha polypeptide 6
ENSOCUG00000017547	ENSMUSG00000004110	12290	MGI:106217	Cacna1e	calcium channel, voltage-dependent, R type, alpha 1E subunit
ENSOCUG00000014673	ENSMUSG00000041791	12344	MGI:106221	Capza3	capping protein (actin filament) muscle Z-line, alpha 3
ENSOCUG00000003591	ENSMUSG00000015733	12343	MGI:106222	Capza2	capping protein (actin filament) muscle Z-line, alpha 2
ENSOCUG00000000270	ENSMUSG00000070372	12340	MGI:106227	Capza1	capping protein (actin filament) muscle Z-line, alpha 1
ENSOCUG00000027476	ENSMUSG00000041096	52808	MGI:106244	Tspyl2	TSPY-like 2
ENSOCUG00000015689	ENSMUSG00000024735	28000	MGI:106247	Prpf19	pre-mRNA processing factor 19
ENSOCUG00000015255	ENSMUSG00000078812	276770	MGI:106248	Eif5a	eukaryotic translation initiation factor 5A
ENSOCUG00000017609	ENSMUSG00000046324	226090	MGI:106250	Ermp1	endoplasmic reticulum metallopeptidase 1
ENSOCUG00000004189	ENSMUSG00000041360	52874	MGI:106253	Pum3	pumilio RNA-binding family member 3
ENSOCUG00000017911	ENSMUSG00000033949	28105	MGI:106264	Trim36	tripartite motif-containing 36
ENSOCUG00000003781	ENSMUSG00000024277	212307	MGI:106271	Mapre2	microtubule-associated protein, RP/EB family, member 2
ENSOCUG00000005499	ENSMUSG00000071074	28064	MGI:106280	Yipf3	Yip1 domain family, member 3
ENSOCUG00000024862	ENSMUSG00000056692	224647	MGI:106281	D17Wsu92e	DNA segment, Chr 17, Wayne State University 92, expressed
ENSOCUG00000015156	ENSMUSG00000020561	28071	MGI:106292	Twistnb	twist basic helix-loop-helix transcription factor 1 neighbor
ENSOCUG00000001266	ENSMUSG00000022752	28185	MGI:106295	Tomm70a	translocase of outer mitochondrial membrane 70A
ENSOCUG00000007367	ENSMUSG00000039738	52864	MGI:106299	Slx4	SLX4 structure-specific endonuclease subunit homolog (S. cerevisiae)
ENSOCUG00000011875	ENSMUSG00000022472	28075	MGI:106313	Desi1	desumoylating isopeptidase 1
ENSOCUG00000000684	ENSMUSG00000022241	110960	MGI:106314	Tars	threonyl-tRNA synthetase
ENSOCUG00000006352	ENSMUSG00000016552	239554	MGI:106315	Foxred2	FAD-dependent oxidoreductase domain containing 2
ENSOCUG00000002984	ENSMUSG00000025558	105445	MGI:106321	Dock9	dedicator of cytokinesis 9
ENSOCUG00000004950	ENSMUSG00000033499	217980	MGI:106330	Larp4b	La ribonucleoprotein domain family, member 4B
ENSOCUG00000027806	ENSMUSG00000021598	28077	MGI:106331	Med10	mediator complex subunit 10
ENSOCUG00000001987	ENSMUSG00000021719	52882	MGI:106334	Rgs7bp	regulator of G-protein signalling 7 binding protein
ENSOCUG00000003324	ENSMUSG00000037896	217864	MGI:106340	Rcor1	REST corepressor 1
ENSOCUG00000003895	ENSMUSG00000022956	28080	MGI:106341	Atp5o	ATP synthase, H+ transporting, mitochondrial F1 complex, O subunit
ENSOCUG00000003744	ENSMUSG00000041629	28081	MGI:106351	Fam104a	family with sequence similarity 104, member A
ENSOCUG00000024538	ENSMUSG00000041623	276852	MGI:106356	D11Wsu47e	DNA segment, Chr 11, Wayne State University 47, expressed
ENSOCUG00000015719	ENSMUSG00000069844	52892	MGI:106362	Sco1	SCO1 cytochrome c oxidase assembly protein
ENSOCUG00000014217	ENSMUSG00000025576	52897	MGI:106368	Rbfox3	RNA binding protein, fox-1 homolog (C. elegans) 3
ENSOCUG00000022046	ENSMUSG00000041164	52915	MGI:106374	Zmiz2	zinc finger, MIZ-type containing 2
ENSOCUG00000011255	ENSMUSG00000025409	110962	MGI:106378	Mbd6	methyl-CpG binding domain protein 6
ENSOCUG00000008270	ENSMUSG00000001783	28088	MGI:106379	Rtcb	RNA 2',3'-cyclic phosphate and 5'-OH ligase
ENSOCUG00000006960	ENSMUSG00000020255	28109	MGI:106381	D10Wsu102e	DNA segment, Chr 10, Wayne State University 102, expressed
ENSOCUG00000004754	ENSMUSG00000019852	215821	MGI:106387	Arfgef3	ARFGEF family member 3
ENSOCUG00000013429	ENSMUSG00000039835	215819	MGI:106390	Nhsl1	NHS-like 1
ENSOCUG00000016118	ENSMUSG00000039485	72480	MGI:106393	Tspyl4	TSPY-like 4
ENSOCUG00000016136	ENSMUSG00000032388	27965	MGI:106403	Spg21	SPG21, maspardin
ENSOCUG00000015786	ENSMUSG00000031703	71927	MGI:106419	Itfg1	integrin alpha FG-GAP repeat containing 1
ENSOCUG00000009283	ENSMUSG00000031953	66817	MGI:106426	Tmem170	transmembrane protein 170
ENSOCUG00000001913	ENSMUSG00000031958	52815	MGI:106428	Ldhd	lactate dehydrogenase D
ENSOCUG00000007071	ENSMUSG00000030967	360216	MGI:106441	Zranb1	zinc finger, RAN-binding domain containing 1
ENSOCUG00000002289	ENSMUSG00000096145	27973	MGI:106442	Vkorc1	vitamin K epoxide reductase complex, subunit 1
ENSOCUG00000022799	ENSMUSG00000024104	28006	MGI:106463	Washc2	WASH complex subunit 2`
ENSOCUG00000029324	ENSMUSG00000029726	231803	MGI:106477	Mepce	methylphosphate capping enzyme
ENSOCUG00000010289	ENSMUSG00000056076	27979	MGI:106478	Eif3b	eukaryotic translation initiation factor 3, subunit B
ENSOCUG00000010029	ENSMUSG00000044221	231413	MGI:106479	Grsf1	G-rich RNA sequence binding factor 1
ENSOCUG00000010015	ENSMUSG00000029291	52822	MGI:106484	Rufy3	RUN and FYVE domain containing 3
ENSOCUG00000022368	ENSMUSG00000037979	215707	MGI:106485	Ccdc92	coiled-coil domain containing 92
ENSOCUG00000016602	ENSMUSG00000042408	100177	MGI:106505	Zmym6	zinc finger, MYM-type 6
ENSOCUG00000003525	ENSMUSG00000029022	28010	MGI:106506	Miip	migration and invasion inhibitory protein
ENSOCUG00000004226	ENSMUSG00000048706	52829	MGI:106510	Lurap1l	leucine rich adaptor protein 1-like
ENSOCUG00000021983	ENSMUSG00000028675	52830	MGI:106512	Pnrc2	proline-rich nuclear receptor coactivator 2
ENSOCUG00000008930	ENSMUSG00000044667	229791	MGI:106530	Plppr4	phospholipid phosphatase related 4
ENSOCUG00000008882	ENSMUSG00000039660	227695	MGI:106544	Spout1	SPOUT domain containing methyltransferase 1
ENSOCUG00000007336	ENSMUSG00000034723	52837	MGI:106558	Tmx4	thioredoxin-related transmembrane protein 4
ENSOCUG00000022929	ENSMUSG00000017734	52840	MGI:106562	Dbndd2	dysbindin (dystrobrevin binding protein 1) domain containing 2
ENSOCUG00000005289	ENSMUSG00000039069	52856	MGI:106565	Mtg2	mitochondrial ribosome associated GTPase 2
ENSOCUG00000002845	ENSMUSG00000026127	27993	MGI:106572	Imp4	IMP4, U3 small nucleolar ribonucleoprotein
ENSOCUG00000004448	ENSMUSG00000003135	52846	MGI:106580	Cnot11	CCR4-NOT transcription complex, subunit 11
ENSOCUG00000013940	ENSMUSG00000014402	22088	MGI:106581	Tsg101	tumor susceptibility gene 101
ENSOCUG00000014086	ENSMUSG00000040929	19726	MGI:106582	Rfx3	regulatory factor X, 3 (influences HLA class II expression)
ENSOCUG00000005005	ENSMUSG00000024206	19725	MGI:106583	Rfx2	regulatory factor X, 2 (influences HLA class II expression)
ENSOCUG00000008593	ENSMUSG00000049612	18377	MGI:106586	Omg	oligodendrocyte myelin glycoprotein
ENSOCUG00000011196	ENSMUSG00000030124	16768	MGI:106588	Lag3	lymphocyte-activation gene 3
ENSOCUG00000001203	ENSMUSG00000028634	16656	MGI:106589	Hivep3	human immunodeficiency virus type I enhancer binding protein 3
ENSOCUG00000008153	ENSMUSG00000040533	17180	MGI:106591	Matn1	matrilin 1, cartilage matrix protein
ENSOCUG00000013023	ENSMUSG00000025059	14933	MGI:106594	Gk	glycerol kinase
ENSOCUG00000009547	ENSMUSG00000025885	17919	MGI:106598	Myo5b	myosin VB
ENSOCUG00000004318	ENSMUSG00000050058	19120	MGI:106601	Prm3	protamine 3
ENSOCUG00000005091	ENSMUSG00000045827	20723	MGI:106603	Serpinb9	serine (or cysteine) peptidase inhibitor, clade B, member 9
ENSOCUG00000000348	ENSMUSG00000021340	14756	MGI:106604	Gpld1	glycosylphosphatidylinositol specific phospholipase D1
ENSOCUG00000026705	ENSMUSG00000010086	22671	MGI:106611	Rnf112	ring finger protein 112
ENSOCUG00000000069	ENSMUSG00000017774	17913	MGI:106612	Myo1c	myosin IC
ENSOCUG00000006978	ENSMUSG00000020888	13543	MGI:106613	Dvl2	dishevelled segment polarity protein 2
ENSOCUG00000026774	ENSMUSG00000020308	110012	MGI:106618	Tpgs1	tubulin polyglutamylase complex subunit 1
ENSOCUG00000015835	ENSMUSG00000032220	71602	MGI:106621	Myo1e	myosin IE
ENSOCUG00000014810	ENSMUSG00000004677	17925	MGI:106624	Myo9b	myosin IXb
ENSOCUG00000024179	ENSMUSG00000037887	18218	MGI:106626	Dusp8	dual specificity phosphatase 8
ENSOCUG00000000169	ENSMUSG00000007946	11859	MGI:106633	Phox2a	paired-like homeobox 2a
ENSOCUG00000024043	ENSMUSG00000050856	11958	MGI:106636	Atp5k	ATP synthase, H+ transporting, mitochondrial F1F0 complex, subunit E
ENSOCUG00000006885	ENSMUSG00000028836	230810	MGI:106637	Slc30a2	solute carrier family 30 (zinc transporter), member 2
ENSOCUG00000029586	ENSMUSG00000028750	18781	MGI:106638	Pla2g2c	phospholipase A2, group IIC
ENSOCUG00000007291	ENSMUSG00000029009	17769	MGI:106639	Mthfr	methylenetetrahydrofolate reductase
ENSOCUG00000009723	ENSMUSG00000039653	12012	MGI:106642	Baat	bile acid-Coenzyme A: amino acid N-acyltransferase
ENSOCUG00000007079	ENSMUSG00000028039	13638	MGI:106644	Efna3	ephrin A3
ENSOCUG00000016264	ENSMUSG00000028024	13809	MGI:106645	Enpep	glutamyl aminopeptidase
ENSOCUG00000012814	ENSMUSG00000018199	20822	MGI:106652	Trove2	TROVE domain family, member 2
ENSOCUG00000006223	ENSMUSG00000045394	17075	MGI:106653	Epcam	epithelial cell adhesion molecule
ENSOCUG00000007414	ENSMUSG00000082229	17954	MGI:106654	Nap1l2	nucleosome assembly protein 1-like 2
ENSOCUG00000005589	ENSMUSG00000079173	22635	MGI:106656	Zan	zonadhesin
ENSOCUG00000002892	ENSMUSG00000015605	20807	MGI:106658	Srf	serum response factor
ENSOCUG00000015946	ENSMUSG00000074340	12659	MGI:106661	Ovgp1	oviductal glycoprotein 1
ENSOCUG00000012761	ENSMUSG00000026980	17076	MGI:106662	Ly75	lymphocyte antigen 75
ENSOCUG00000014812	ENSMUSG00000027435	17064	MGI:106664	Cd93	CD93 antigen
ENSOCUG00000000580	ENSMUSG00000031881	12556	MGI:106671	Cdh16	cadherin 16
ENSOCUG00000007449	ENSMUSG00000031962	12555	MGI:106672	Cdh15	cadherin 15
ENSOCUG00000008029	ENSMUSG00000027335	11550	MGI:106673	Adra1d	adrenergic receptor, alpha 1d
ENSOCUG00000026268	ENSMUSG00000022878	11450	MGI:106675	Adipoq	adiponectin, C1Q and collagen domain containing
ENSOCUG00000009358	ENSMUSG00000067860	22773	MGI:106676	Zic3	zinc finger protein of the cerebellum 3
ENSOCUG00000012080	ENSMUSG00000025094	214084	MGI:106677	Slc18a2	solute carrier family 18 (vesicular monoamine), member 2
ENSOCUG00000000219	ENSMUSG00000061524	22772	MGI:106679	Zic2	zinc finger protein of the cerebellum 2
ENSOCUG00000001012	ENSMUSG00000036330	110877	MGI:106684	Slc18a1	solute carrier family 18 (vesicular monoamine), member 1
ENSOCUG00000023624	ENSMUSG00000096228	18349	MGI:106685	Olfr5	olfactory receptor 5
ENSOCUG00000002014	ENSMUSG00000032667	330260	MGI:106687	Pon2	paraoxonase 2
ENSOCUG00000008162	ENSMUSG00000042638	14917	MGI:106903	Gucy2c	guanylate cyclase 2c
ENSOCUG00000005011	ENSMUSG00000022884	13682	MGI:106906	Eif4a2	eukaryotic translation initiation factor 4A2
ENSOCUG00000015389	ENSMUSG00000030353	21679	MGI:106907	Tead4	TEA domain family member 4
ENSOCUG00000008660	ENSMUSG00000004865	20815	MGI:106908	Srpk1	serine/arginine-rich protein specific kinase 1
ENSOCUG00000010479	ENSMUSG00000031352	15159	MGI:106911	Hccs	holocytochrome c synthetase
ENSOCUG00000009082	ENSMUSG00000021771	22334	MGI:106915	Vdac2	voltage-dependent anion channel 2
ENSOCUG00000003370	ENSMUSG00000054733	110265	MGI:106916	Msra	methionine sulfoxide reductase A
ENSOCUG00000017741	ENSMUSG00000021109	15251	MGI:106918	Hif1a	hypoxia inducible factor 1, alpha subunit
ENSOCUG00000009369	ENSMUSG00000020402	22333	MGI:106919	Vdac1	voltage-dependent anion channel 1
ENSOCUG00000012692	ENSMUSG00000019961	21917	MGI:106920	Tmpo	thymopoietin
ENSOCUG00000023792	ENSMUSG00000070304	72821	MGI:106921	Scn2b	sodium channel, voltage-gated, type II, beta
ENSOCUG00000024318	ENSMUSG00000008892	22335	MGI:106922	Vdac3	voltage-dependent anion channel 3
ENSOCUG00000002698	ENSMUSG00000053626	21892	MGI:106923	Tll1	tolloid-like
ENSOCUG00000001041	ENSMUSG00000035683	17279	MGI:106924	Melk	maternal embryonic leucine zipper kinase
ENSOCUG00000005520	ENSMUSG00000037625	18417	MGI:106925	Cldn11	claudin 11
ENSOCUG00000013288	ENSMUSG00000028158	17777	MGI:106926	Mttp	microsomal triglyceride transfer protein
ENSOCUG00000009532	ENSMUSG00000037138	16764	MGI:106927	Aff3	AF4/FMR2 family, member 3
ENSOCUG00000003266	ENSMUSG00000042557	20466	MGI:107157	Sin3a	transcriptional regulator, SIN3A (yeast)
ENSOCUG00000026276	ENSMUSG00000031622	20467	MGI:107158	Sin3b	transcriptional regulator, SIN3B (yeast)
ENSOCUG00000014183	ENSMUSG00000050100	15372	MGI:107159	Hmx2	H6 homeobox 2
ENSOCUG00000024979	ENSMUSG00000027442	13012	MGI:107161	Cst8	cystatin 8 (cystatin-related epididymal spermatogenic)
ENSOCUG00000012543	ENSMUSG00000021816	19056	MGI:107163	Ppp3cb	protein phosphatase 3, catalytic subunit, beta isoform
ENSOCUG00000011398	ENSMUSG00000028161	19055	MGI:107164	Ppp3ca	protein phosphatase 3, catalytic subunit, alpha isoform
ENSOCUG00000003473	ENSMUSG00000011171	22355	MGI:107166	Vipr2	vasoactive intestinal peptide receptor 2
ENSOCUG00000016458	ENSMUSG00000032411	211586	MGI:107167	Tfdp2	transcription factor Dp 2
ENSOCUG00000011957	ENSMUSG00000020897	20877	MGI:107168	Aurkb	aurora kinase B
ENSOCUG00000024384	ENSMUSG00000009549	20813	MGI:107169	Srp14	signal recognition particle 14
ENSOCUG00000003763	ENSMUSG00000027843	19260	MGI:107170	Ptpn22	protein tyrosine phosphatase, non-receptor type 22 (lymphoid)
ENSOCUG00000027562	ENSMUSG00000033953	19058	MGI:107172	Ppp3r1	protein phosphatase 3, regulatory subunit B, alpha isoform (calcineurin B, type I)
ENSOCUG00000000091	ENSMUSG00000038224	18816	MGI:107173	Serpinf2	serine (or cysteine) peptidase inhibitor, clade F, member 2
ENSOCUG00000008531	ENSMUSG00000033122	15487	MGI:107177	Hsd17b3	hydroxysteroid (17-beta) dehydrogenase 3
ENSOCUG00000011143	ENSMUSG00000024912	14283	MGI:107179	Fosl1	fos-like antigen 1
ENSOCUG00000001129	ENSMUSG00000001225	13487	MGI:107181	Slc26a3	solute carrier family 26, member 3
ENSOCUG00000003665	ENSMUSG00000079227	12774	MGI:107182	Ccr5	chemokine (C-C motif) receptor 5
ENSOCUG00000002641	ENSMUSG00000025613	12469	MGI:107183	Cct8	chaperonin containing Tcp1, subunit 8 (theta)
ENSOCUG00000002429	ENSMUSG00000030007	12468	MGI:107184	Cct7	chaperonin containing Tcp1, subunit 7 (eta)
ENSOCUG00000021231	ENSMUSG00000022234	12465	MGI:107185	Cct5	chaperonin containing Tcp1, subunit 5 (epsilon)
ENSOCUG00000017199	ENSMUSG00000034024	12461	MGI:107186	Cct2	chaperonin containing Tcp1, subunit 2 (beta)
ENSOCUG00000005429	ENSMUSG00000022508	12053	MGI:107187	Bcl6	B cell leukemia/lymphoma 6
ENSOCUG00000017566	ENSMUSG00000015709	11864	MGI:107188	Arnt2	aryl hydrocarbon receptor nuclear translocator 2
ENSOCUG00000002057	ENSMUSG00000022868	11625	MGI:107189	Ahsg	alpha-2-HS-glycoprotein
ENSOCUG00000015048	ENSMUSG00000052430	12167	MGI:107191	Bmpr1b	bone morphogenetic protein receptor, type 1B
ENSOCUG00000010959	ENSMUSG00000036972	22774	MGI:107201	Zic4	zinc finger protein of the cerebellum 4
ENSOCUG00000014663	ENSMUSG00000034218	11920	MGI:107202	Atm	ataxia telangiectasia mutated
ENSOCUG00000002093	ENSMUSG00000030652	12850	MGI:107207	Coq7	demethyl-Q 7
ENSOCUG00000025009	ENSMUSG00000034345	66467	MGI:107227	Gtf2h5	general transcription factor IIH, polypeptide 5
ENSOCUG00000010313	ENSMUSG00000022770	13383	MGI:107231	Dlg1	discs large MAGUK scaffold protein 1
ENSOCUG00000004817	ENSMUSG00000022538	224092	MGI:107236	Lsg1	large 60S subunit nuclear export GTPase 1
ENSOCUG00000013089	ENSMUSG00000055692	224019	MGI:107238	Tmem191c	transmembrane protein 191C
ENSOCUG00000002919	ENSMUSG00000007589	28113	MGI:107246	Tinf2	Terf1 (TRF1)-interacting nuclear factor 2
ENSOCUG00000012104	ENSMUSG00000022056	11500	MGI:107247	Adam7	a disintegrin and metallopeptidase domain 7
ENSOCUG00000007918	ENSMUSG00000021595	28114	MGI:107252	Nsun2	NOL1/NOP2/Sun domain family member 2
ENSOCUG00000010505	ENSMUSG00000020841	12874	MGI:107265	Cpd	carboxypeptidase D
ENSOCUG00000004305	ENSMUSG00000025241	17281	MGI:107277	Fyco1	FYVE and coiled-coil domain containing 1
ENSOCUG00000009428	ENSMUSG00000032549	270192	MGI:107283	Rab6b	RAB6B, member RAS oncogene family
ENSOCUG00000006137	ENSMUSG00000032359	13036	MGI:107285	Ctsh	cathepsin H
ENSOCUG00000015125	ENSMUSG00000005142	17159	MGI:107286	Man2b1	mannosidase 2, alpha B1
ENSOCUG00000008444	ENSMUSG00000030870	28018	MGI:107301	Ubfd1	ubiquitin family domain containing 1
ENSOCUG00000004655	ENSMUSG00000066704	13090	MGI:107303	Cyp2b19	cytochrome P450, family 2, subfamily b, polypeptide 19
ENSOCUG00000003742	ENSMUSG00000030330	28019	MGI:107307	Ing4	inhibitor of growth family, member 4
ENSOCUG00000012203	ENSMUSG00000042216	52850	MGI:107320	Sgsm1	small G protein signaling modulator 1
ENSOCUG00000021923	ENSMUSG00000042589	13048	MGI:107321	Cux2	cut-like homeobox 2
ENSOCUG00000006340	ENSMUSG00000044018	28028	MGI:107329	Mrpl50	mitochondrial ribosomal protein L50
ENSOCUG00000013561	ENSMUSG00000027774	28030	MGI:107339	Gfm1	G elongation factor, mitochondrial 1
ENSOCUG00000011085	ENSMUSG00000038642	13040	MGI:107341	Ctss	cathepsin S
ENSOCUG00000029581	ENSMUSG00000027551	22722	MGI:107342	Zfp64	zinc finger protein 64
ENSOCUG00000025954	ENSMUSG00000026288	16331	MGI:107357	Inpp5d	inositol polyphosphate-5-phosphatase D
ENSOCUG00000001856	ENSMUSG00000004552	13034	MGI:107361	Ctse	cathepsin E
ENSOCUG00000002975	ENSMUSG00000027882	20912	MGI:107362	Stxbp3	syntaxin binding protein 3
ENSOCUG00000016172	ENSMUSG00000026797	20910	MGI:107363	Stxbp1	syntaxin binding protein 1
ENSOCUG00000004270	ENSMUSG00000025929	16171	MGI:107364	Il17a	interleukin 17A
ENSOCUG00000029520	ENSMUSG00000015120	22196	MGI:107365	Ube2i	ubiquitin-conjugating enzyme E2I
ENSOCUG00000010121	ENSMUSG00000004626	20911	MGI:107370	Stxbp2	syntaxin binding protein 2
ENSOCUG00000015306	ENSMUSG00000034930	20166	MGI:107371	Rtkn	rhotekin
ENSOCUG00000001985	ENSMUSG00000026730	19212	MGI:107372	Pter	phosphotriesterase related
ENSOCUG00000017619	ENSMUSG00000022136	100037258	MGI:107373	Dnajc3	DnaJ heat shock protein family (Hsp40) member C3
ENSOCUG00000008956	ENSMUSG00000020553	18559	MGI:107375	Pctp	phosphatidylcholine transfer protein
ENSOCUG00000027716	ENSMUSG00000054256	17690	MGI:107376	Msi1	musashi RNA-binding protein 1
ENSOCUG00000005061	ENSMUSG00000001663	14871	MGI:107379	Gstt1	glutathione S-transferase, theta 1
ENSOCUG00000001108	ENSMUSG00000018287	216873	MGI:107380	Spag7	sperm associated antigen 7
ENSOCUG00000011082	ENSMUSG00000029859	13835	MGI:107381	Epha1	Eph receptor A1
ENSOCUG00000008833	ENSMUSG00000024411	11829	MGI:107387	Aqp4	aquaporin 4
ENSOCUG00000009160	ENSMUSG00000002897	16172	MGI:107399	Il17ra	interleukin 17 receptor A
ENSOCUG00000010653	ENSMUSG00000026034	12747	MGI:107403	Clk1	CDC-like kinase 1
ENSOCUG00000005884	ENSMUSG00000035033	21375	MGI:107404	Tbr1	T-box brain gene 1
ENSOCUG00000026236	ENSMUSG00000006215	22642	MGI:107410	Zbtb17	zinc finger and BTB domain containing 17
ENSOCUG00000006026	ENSMUSG00000021774	22194	MGI:107411	Ube2e1	ubiquitin-conjugating enzyme E2E 1
ENSOCUG00000006972	ENSMUSG00000027011	22193	MGI:107412	Ube2e3	ubiquitin-conjugating enzyme E2E 3
ENSOCUG00000014848	ENSMUSG00000039304	22035	MGI:107414	Tnfsf10	tumor necrosis factor (ligand) superfamily, member 10
ENSOCUG00000025823	ENSMUSG00000020485	20922	MGI:107416	Supt4a	suppressor of Ty 4A
ENSOCUG00000023383	ENSMUSG00000027953	19729	MGI:107417	Slc50a1	solute carrier family 50 (sugar transporter), member 1
ENSOCUG00000025860	ENSMUSG00000031392	16179	MGI:107420	Irak1	interleukin-1 receptor-associated kinase 1
ENSOCUG00000011974	ENSMUSG00000035382	18554	MGI:107421	Pcsk7	proprotein convertase subtilisin/kexin type 7
ENSOCUG00000010702	ENSMUSG00000021224	18222	MGI:107423	Numb	NUMB endocytic adaptor protein
ENSOCUG00000023782	ENSMUSG00000073889	16157	MGI:107426	Il11ra1	interleukin 11 receptor, alpha chain 1
ENSOCUG00000016262	ENSMUSG00000028546	15572	MGI:107427	Elavl4	ELAV like RNA binding protein 4
ENSOCUG00000014026	ENSMUSG00000031796	14894	MGI:107428	Cfap20	cilia and flagella associated protein 20
ENSOCUG00000003033	ENSMUSG00000022144	14573	MGI:107430	Gdnf	glial cell line derived neurotrophic factor
ENSOCUG00000004487	ENSMUSG00000000223	13497	MGI:107432	Drp2	dystrophin related protein 2
ENSOCUG00000004461	ENSMUSG00000025370	12565	MGI:107433	Cdh9	cadherin 9
ENSOCUG00000013774	ENSMUSG00000036510	12564	MGI:107434	Cdh8	cadherin 8
ENSOCUG00000000360	ENSMUSG00000039385	12563	MGI:107435	Cdh6	cadherin 6
ENSOCUG00000008106	ENSMUSG00000022321	320873	MGI:107436	Cdh10	cadherin 10
ENSOCUG00000024481	ENSMUSG00000079110	12335	MGI:107437	Capn3	calpain 3
ENSOCUG00000011358	ENSMUSG00000036707	12283	MGI:107438	Cab39	calcium binding protein 39
ENSOCUG00000008600	ENSMUSG00000045551	14293	MGI:107443	Fpr1	formyl peptide receptor 1
ENSOCUG00000016107	ENSMUSG00000048915	13640	MGI:107444	Efna5	ephrin A5
ENSOCUG00000022068	ENSMUSG00000045608	223843	MGI:107445	Dbx2	developing brain homeobox 2
ENSOCUG00000002867	ENSMUSG00000019726	17101	MGI:107448	Lyst	lysosomal trafficking regulator
ENSOCUG00000014667	ENSMUSG00000020664	13382	MGI:107450	Dld	dihydrolipoamide dehydrogenase
ENSOCUG00000017161	ENSMUSG00000020937	72469	MGI:107451	Plcd3	phospholipase C, delta 3
ENSOCUG00000021348	ENSMUSG00000030380	109889	MGI:107457	Mzf1	myeloid zinc finger 1
ENSOCUG00000009606	ENSMUSG00000036751	110323	MGI:107460	Cox6b1	cytochrome c oxidase, subunit 6B1
ENSOCUG00000015167	ENSMUSG00000001622	12994	MGI:107461	Csn3	casein kappa
ENSOCUG00000010755	ENSMUSG00000039943	18798	MGI:107464	Plcb4	phospholipase C, beta 4
ENSOCUG00000006540	ENSMUSG00000040061	18796	MGI:107465	Plcb2	phospholipase C, beta 2
ENSOCUG00000001986	ENSMUSG00000026173	18802	MGI:107469	Plcd4	phospholipase C, delta 4
ENSOCUG00000002386	ENSMUSG00000067367	17089	MGI:107470	Lyar	Ly1 antibody reactive clone
ENSOCUG00000016445	ENSMUSG00000015468	18132	MGI:107471	Notch4	notch 4
ENSOCUG00000006597	ENSMUSG00000002190	12745	MGI:107472	Clgn	calmegin
ENSOCUG00000017793	ENSMUSG00000029084	12494	MGI:107474	Cd38	CD38 antigen
ENSOCUG00000013363	ENSMUSG00000030987	20866	MGI:107476	Stim1	stromal interaction molecule 1
ENSOCUG00000013586	ENSMUSG00000028718	20460	MGI:107477	Stil	Scl/Tal1 interrupting locus
ENSOCUG00000026930	ENSMUSG00000041354	19732	MGI:107483	Rgl2	ral guanine nucleotide dissociation stimulator-like 2
ENSOCUG00000026307	ENSMUSG00000026482	19731	MGI:107484	Rgl1	ral guanine nucleotide dissociation stimulator,-like 1
ENSOCUG00000024167	ENSMUSG00000026821	19730	MGI:107485	Ralgds	ral guanine nucleotide dissociation stimulator
ENSOCUG00000017625	ENSMUSG00000040374	19302	MGI:107486	Pex2	peroxisomal biogenesis factor 2
ENSOCUG00000006020	ENSMUSG00000057457	18675	MGI:107489	Phex	phosphate regulating endopeptidase homolog, X-linked
ENSOCUG00000016822	ENSMUSG00000024975	18569	MGI:107490	Pdcd4	programmed cell death 4
ENSOCUG00000026297	ENSMUSG00000069132	18232	MGI:107491	Nxph2	neurexophilin 2
ENSOCUG00000012983	ENSMUSG00000046178	18231	MGI:107492	Nxph1	neurexophilin 1
ENSOCUG00000021304	ENSMUSG00000034868	67938	MGI:107494	Myl12b	myosin, light chain 12B, regulatory
ENSOCUG00000026229	ENSMUSG00000057092	17178	MGI:107497	Fxyd3	FXYD domain-containing ion transport regulator 3
ENSOCUG00000021533	ENSMUSG00000020377	17001	MGI:107498	Ltc4s	leukotriene C4 synthase
ENSOCUG00000004410	ENSMUSG00000014351	14607	MGI:107504	Gip	gastric inhibitory polypeptide
ENSOCUG00000008200	ENSMUSG00000060063	11690	MGI:107505	Alox5ap	arachidonate 5-lipoxygenase activating protein
ENSOCUG00000014548	ENSMUSG00000034282	14027	MGI:107507	Evpl	envoplakin
ENSOCUG00000016277	ENSMUSG00000029377	13874	MGI:107508	Ereg	epiregulin
ENSOCUG00000022791	ENSMUSG00000030996	11870	MGI:107511	Art1	ADP-ribosyltransferase 1
ENSOCUG00000025943	ENSMUSG00000005836	14465	MGI:107516	Gata6	GATA binding protein 6
ENSOCUG00000015425	ENSMUSG00000001440	16211	MGI:107532	Kpnb1	karyopherin (importin) beta 1
ENSOCUG00000002447	ENSMUSG00000055991	22757	MGI:107533	Zkscan5	zinc finger with KRAB and SCAN domains 5
ENSOCUG00000000515	ENSMUSG00000053964	16855	MGI:107536	Lgals4	lectin, galactose binding, soluble 4
ENSOCUG00000013067	ENSMUSG00000030720	12752	MGI:107537	Cln3	ceroid lipofuscinosis, neuronal 3, juvenile (Batten, Spielmeyer-Vogt disease)
ENSOCUG00000012651	ENSMUSG00000025902	20671	MGI:107543	Sox17	SRY (sex determining region Y)-box 17
ENSOCUG00000025696	ENSMUSG00000030651	11872	MGI:107545	Art2b	ADP-ribosyltransferase 2b
ENSOCUG00000028209	ENSMUSG00000042043	21371	MGI:107549	Tbca	tubulin cofactor A
ENSOCUG00000009564	ENSMUSG00000057286	20446	MGI:107553	St6galnac2	ST6 (alpha-N-acetyl-neuraminyl-2,3-beta-galactosyl-1,3)-N-acetylgalactosaminide alpha-2,6-sialyltransferase 2
ENSOCUG00000006139	ENSMUSG00000052133	20357	MGI:107555	Sema5b	sema domain, seven thrombospondin repeats (type 1 and type 1-like), transmembrane domain (TM) and short cytoplasmic domain, (semaphorin) 5B
ENSOCUG00000004275	ENSMUSG00000022231	20356	MGI:107556	Sema5a	sema domain, seven thrombospondin repeats (type 1 and type 1-like), transmembrane domain (TM) and short cytoplasmic domain, (semaphorin) 5A
ENSOCUG00000009070	ENSMUSG00000028780	20348	MGI:107557	Sema3c	sema domain, immunoglobulin domain (Ig), short basic domain, secreted, (semaphorin) 3C
ENSOCUG00000011919	ENSMUSG00000028883	20346	MGI:107558	Sema3a	sema domain, immunoglobulin domain (Ig), short basic domain, secreted, (semaphorin) 3A
ENSOCUG00000014916	ENSMUSG00000030539	20352	MGI:107559	Sema4b	sema domain, immunoglobulin domain (Ig), transmembrane domain (TM) and short cytoplasmic domain, (semaphorin) 4B
ENSOCUG00000001326	ENSMUSG00000028064	20351	MGI:107560	Sema4a	sema domain, immunoglobulin domain (Ig), transmembrane domain (TM) and short cytoplasmic domain, (semaphorin) 4A
ENSOCUG00000002344	ENSMUSG00000057969	20347	MGI:107561	Sema3b	sema domain, immunoglobulin domain (Ig), short basic domain, secreted, (semaphorin) 3B
ENSOCUG00000009828	ENSMUSG00000032503	74100	MGI:107562	Arpp21	cyclic AMP-regulated phosphoprotein, 21
ENSOCUG00000024399	ENSMUSG00000025402	17937	MGI:107563	Nab2	Ngfi-A binding protein 2
ENSOCUG00000008556	ENSMUSG00000002881	17936	MGI:107564	Nab1	Ngfi-A binding protein 1
ENSOCUG00000013824	ENSMUSG00000026585	16579	MGI:107566	Kifap3	kinesin-associated protein 3
ENSOCUG00000028024	ENSMUSG00000046879	15944	MGI:107567	Irgm1	immunity-related GTPase family M member 1
ENSOCUG00000010009	ENSMUSG00000052234	13861	MGI:107569	Epx	eosinophil peroxidase
ENSOCUG00000014515	ENSMUSG00000000058	12390	MGI:107571	Cav2	caveolin 2
ENSOCUG00000009878	ENSMUSG00000025860	11798	MGI:107572	Xiap	X-linked inhibitor of apoptosis
ENSOCUG00000021890	ENSMUSG00000047731	226178	MGI:107577	Wbp1l	WW domain binding protein 1 like
ENSOCUG00000003178	ENSMUSG00000022463	20788	MGI:107585	Srebf2	sterol regulatory element binding factor 2
ENSOCUG00000028186	ENSMUSG00000002325	16391	MGI:107587	Irf9	interferon regulatory factor 9
ENSOCUG00000026851	ENSMUSG00000040055	14623	MGI:107588	Gjb6	gap junction protein, beta 6
ENSOCUG00000003569	ENSMUSG00000093930	208715	MGI:107592	Hmgcs1	3-hydroxy-3-methylglutaryl-Coenzyme A synthase 1
ENSOCUG00000015345	ENSMUSG00000025323	20688	MGI:107595	Sp4	trans-acting transcription factor 4
ENSOCUG00000026209	ENSMUSG00000033054	244879	MGI:107605	Npat	nuclear protein in the AT region
ENSOCUG00000023342	ENSMUSG00000030401	20167	MGI:107612	Rtn2	reticulon 2 (Z-band associated protein)
ENSOCUG00000001906	ENSMUSG00000053004	15465	MGI:107619	Hrh1	histamine receptor H1
ENSOCUG00000013967	ENSMUSG00000041939	17855	MGI:107624	Mvk	mevalonate kinase
ENSOCUG00000001168	ENSMUSG00000001089	269593	MGI:107629	Luzp1	leucine zipper protein 1
ENSOCUG00000024041	ENSMUSG00000047557	17035	MGI:107633	Lxn	latexin
ENSOCUG00000007073	ENSMUSG00000027968	28036	MGI:107634	Larp7	La ribonucleoprotein domain family, member 7
ENSOCUG00000005623	ENSMUSG00000075316	20274	MGI:107636	Scn9a	sodium channel, voltage-gated, type IX, alpha
ENSOCUG00000009114	ENSMUSG00000026750	19177	MGI:107637	Psmb7	proteasome (prosome, macropain) subunit, beta type 7
ENSOCUG00000016225	ENSMUSG00000006057	11951	MGI:107653	Atp5g1	ATP synthase, H+ transporting, mitochondrial F0 complex, subunit C1 (subunit 9)
ENSOCUG00000002815	ENSMUSG00000022965	15980	MGI:107654	Ifngr2	interferon gamma receptor 2
ENSOCUG00000013254	ENSMUSG00000020009	15979	MGI:107655	Ifngr1	interferon gamma receptor 1
ENSOCUG00000024937	ENSMUSG00000055170	15978	MGI:107656	Ifng	interferon gamma
ENSOCUG00000021649	ENSMUSG00000048806	15977	MGI:107657	Ifnb1	interferon beta 1, fibroblast
ENSOCUG00000014888	ENSMUSG00000022967	15975	MGI:107658	Ifnar1	interferon (alpha and beta) receptor 1
ENSOCUG00000007631	ENSMUSG00000031517	234267	MGI:107671	Gpm6a	glycoprotein m6a
ENSOCUG00000026383	ENSMUSG00000029762	14187	MGI:107673	Akr1b8	aldo-keto reductase family 1, member B8
ENSOCUG00000006549	ENSMUSG00000028076	12479	MGI:107674	Cd1d1	CD1d1 antigen
ENSOCUG00000003727	ENSMUSG00000064289	21353	MGI:107676	Tank	TRAF family member-associated Nf-kappa B activator
ENSOCUG00000017569	ENSMUSG00000011034	20537	MGI:107678	Slc5a1	solute carrier family 5 (sodium/glucose cotransporter), member 1
ENSOCUG00000027423	ENSMUSG00000034892	20090	MGI:107681	Rps29	ribosomal protein S29
ENSOCUG00000009674	ENSMUSG00000056612	18938	MGI:107682	Ppp1r14b	protein phosphatase 1, regulatory inhibitor subunit 14B
ENSOCUG00000015623	ENSMUSG00000031398	18846	MGI:107683	Plxna3	plexin A3
ENSOCUG00000003482	ENSMUSG00000026640	18845	MGI:107684	Plxna2	plexin A2
ENSOCUG00000003662	ENSMUSG00000030084	18844	MGI:107685	Plxna1	plexin A1
ENSOCUG00000014194	ENSMUSG00000029632	17992	MGI:107686	Ndufa4	Ndufa4, mitochondrial complex associated
ENSOCUG00000012322	ENSMUSG00000032717	17240	MGI:107687	Mdfi	MyoD family inhibitor
ENSOCUG00000011937	ENSMUSG00000018395	16568	MGI:107689	Kif3a	kinesin family member 3A
ENSOCUG00000012546	ENSMUSG00000060206	242466	MGI:107690	Zfp462	zinc finger protein 462
ENSOCUG00000025683	ENSMUSG00000043073	625530	MGI:107697	Usp17le	ubiquitin specific peptidase 17-like E
ENSOCUG00000007503	ENSMUSG00000033538	12363	MGI:107700	Casp4	caspase 4, apoptosis-related cysteine peptidase
ENSOCUG00000023789	ENSMUSG00000060376	12039	MGI:107701	Bckdha	branched chain ketoacid dehydrogenase E1, alpha polypeptide
ENSOCUG00000008651	ENSMUSG00000031239	16431	MGI:107706	Itm2a	integral membrane protein 2A
ENSOCUG00000009081	ENSMUSG00000037013	268996	MGI:107708	Ss18	SS18, nBAF chromatin remodeling complex subunit
ENSOCUG00000026619	ENSMUSG00000024388	17922	MGI:107709	Myo7b	myosin VIIB
ENSOCUG00000000558	ENSMUSG00000024300	17916	MGI:107711	Myo1f	myosin IF
ENSOCUG00000013305	ENSMUSG00000033826	13417	MGI:107714	Dnah8	dynein, axonemal, heavy chain 8
ENSOCUG00000017519	ENSMUSG00000022272	17909	MGI:107716	Myo10	myosin X
ENSOCUG00000004142	ENSMUSG00000022443	17886	MGI:107717	Myh9	myosin, heavy polypeptide 9, non-muscle
ENSOCUG00000010205	ENSMUSG00000022262	110082	MGI:107718	Dnah5	dynein, axonemal, heavy chain 5
ENSOCUG00000007895	ENSMUSG00000019027	110084	MGI:107721	Dnah1	dynein, axonemal, heavy chain 1
ENSOCUG00000000848	ENSMUSG00000002052	20926	MGI:107726	Supt6	suppressor of Ty 6
ENSOCUG00000008513	ENSMUSG00000035441	338367	MGI:107728	Myo1d	myosin ID
ENSOCUG00000012816	ENSMUSG00000049604	15408	MGI:107730	Hoxb13	homeobox B13
ENSOCUG00000012688	ENSMUSG00000005237	327954	MGI:107731	Dnah2	dynein, axonemal, heavy chain 2
ENSOCUG00000001335	ENSMUSG00000025401	432516	MGI:107732	Myo1a	myosin IA
ENSOCUG00000011262	ENSMUSG00000025410	69654	MGI:107733	Dctn2	dynactin 2
ENSOCUG00000017425	ENSMUSG00000039585	270163	MGI:107735	Myo9a	myosin IXa
ENSOCUG00000016257	ENSMUSG00000047193	110350	MGI:107736	Dync2h1	dynein cytoplasmic 2 heavy chain 1
ENSOCUG00000006143	ENSMUSG00000035770	234663	MGI:107738	Dync1li2	dynein, cytoplasmic 1 light intermediate chain 2
ENSOCUG00000006627	ENSMUSG00000031628	12367	MGI:107739	Casp3	caspase 3
ENSOCUG00000026358	ENSMUSG00000032327	20897	MGI:107742	Stra6	stimulated by retinoic acid gene 6
ENSOCUG00000012213	ENSMUSG00000029757	13426	MGI:107743	Dync1i1	dynein cytoplasmic 1 intermediate chain 1
ENSOCUG00000010057	ENSMUSG00000052861	330355	MGI:107744	Dnah6	dynein, axonemal, heavy chain 6
ENSOCUG00000015231	ENSMUSG00000031865	13191	MGI:107745	Dctn1	dynactin 1
ENSOCUG00000008247	ENSMUSG00000027506	21985	MGI:107749	Tpd52	tumor protein D52
ENSOCUG00000009944	ENSMUSG00000027012	13427	MGI:107750	Dync1i2	dynein cytoplasmic 1 intermediate chain 2
ENSOCUG00000011060	ENSMUSG00000018417	17912	MGI:107752	Myo1b	myosin IB
ENSOCUG00000004405	ENSMUSG00000048904	18014	MGI:107754	Neurog1	neurogenin 1
ENSOCUG00000023536	ENSMUSG00000038255	18013	MGI:107755	Neurod2	neurogenic differentiation 2
ENSOCUG00000023702	ENSMUSG00000024843	12660	MGI:107760	Chka	choline kinase alpha
ENSOCUG00000016929	ENSMUSG00000037032	11785	MGI:107765	Apbb1	amyloid beta (A4) precursor protein-binding, family B, member 1
ENSOCUG00000005197	ENSMUSG00000017631	109934	MGI:107771	Abr	active BCR-related gene
ENSOCUG00000007715	ENSMUSG00000057551	244713	MGI:107775	Zfp317	zinc finger protein 317
ENSOCUG00000006681	ENSMUSG00000022890	11957	MGI:107777	Atp5j	ATP synthase, H+ transporting, mitochondrial F0 complex, subunit F
ENSOCUG00000029740	ENSMUSG00000046185	74352	MGI:107780	Zfp84	zinc finger protein 84
ENSOCUG00000003568	ENSMUSG00000059975	72723	MGI:107784	Zfp74	zinc finger protein 74
ENSOCUG00000000338	ENSMUSG00000032412	11933	MGI:107788	Atp1b3	ATPase, Na+/K+ transporting, beta 3 polypeptide
ENSOCUG00000015388	ENSMUSG00000068328	11993	MGI:107789	Aup1	ancient ubiquitous protein 1
ENSOCUG00000009321	ENSMUSG00000029595	16873	MGI:107792	Lhx5	LIM homeobox protein 5
ENSOCUG00000016000	ENSMUSG00000064141	381549	MGI:107794	Zfp69	zinc finger protein 69
ENSOCUG00000015029	ENSMUSG00000060373	15381	MGI:107795	Hnrnpc	heterogeneous nuclear ribonucleoprotein C
ENSOCUG00000000153	ENSMUSG00000028743	110198	MGI:107796	Akr7a5	aldo-keto reductase family 7, member A5 (aflatoxin aldehyde reductase)
ENSOCUG00000008954	ENSMUSG00000036390	13197	MGI:107799	Gadd45a	growth arrest and DNA-damage-inducible 45 alpha
ENSOCUG00000006090	ENSMUSG00000025393	11947	MGI:107801	Atp5b	ATP synthase, H+ transporting mitochondrial F1 complex, beta subunit
ENSOCUG00000004082	ENSMUSG00000023004	22143	MGI:107804	Tuba1b	tubulin, alpha 1B
ENSOCUG00000013627	ENSMUSG00000044894	22272	MGI:107807	Uqcrq	ubiquinol-cytochrome c reductase, complex III subunit VII
ENSOCUG00000023014	ENSMUSG00000006299	227290	MGI:107809	Aamp	angio-associated migratory protein
ENSOCUG00000014405	ENSMUSG00000003923	21780	MGI:107810	Tfam	transcription factor A, mitochondrial
ENSOCUG00000012979	ENSMUSG00000025582	18164	MGI:107811	Nptx1	neuronal pentraxin 1
ENSOCUG00000002187	ENSMUSG00000001525	22154	MGI:107812	Tubb5	tubulin, beta 5 class I
ENSOCUG00000027557	ENSMUSG00000062380	22152	MGI:107813	Tubb3	tubulin, beta 3 class III
ENSOCUG00000014355	ENSMUSG00000026409	18640	MGI:107815	Pfkfb2	6-phosphofructo-2-kinase/fructose-2,6-biphosphatase 2
ENSOCUG00000001716	ENSMUSG00000025271	18639	MGI:107816	Pfkfb1	6-phosphofructo-2-kinase/fructose-2,6-biphosphatase 1
ENSOCUG00000006167	ENSMUSG00000041550	268591	MGI:107817	Serpina5	serine (or cysteine) peptidase inhibitor, clade A, member 5
ENSOCUG00000017494	ENSMUSG00000020695	17534	MGI:107818	Mrc2	mannose receptor, C type 2
ENSOCUG00000027106	ENSMUSG00000022367	15117	MGI:107821	Has2	hyaluronan synthase 2
ENSOCUG00000015316	ENSMUSG00000031168	13595	MGI:107822	Ebp	phenylalkylamine Ca2+ antagonist (emopamil) binding protein
ENSOCUG00000011090	ENSMUSG00000028111	13038	MGI:107823	Ctsk	cathepsin K
ENSOCUG00000024244	ENSMUSG00000047898	12773	MGI:107824	Ccr4	chemokine (C-C motif) receptor 4
ENSOCUG00000001216	ENSMUSG00000025473	11501	MGI:107825	Adam8	a disintegrin and metallopeptidase domain 8
ENSOCUG00000022192	ENSMUSG00000109324	15469	MGI:107846	Prmt1	protein arginine N-methyltransferase 1
ENSOCUG00000024997	ENSMUSG00000062591	22153	MGI:107848	Tubb4a	tubulin, beta 4A class IVA
ENSOCUG00000007030	ENSMUSG00000003527	27886	MGI:107854	Ess2	ess-2 splicing factor
ENSOCUG00000002652	ENSMUSG00000033697	223666	MGI:107858	Arhgap39	Rho GTPase activating protein 39
ENSOCUG00000002032	ENSMUSG00000050350	110168	MGI:107859	Gpr18	G protein-coupled receptor 18
ENSOCUG00000009827	ENSMUSG00000058672	22151	MGI:107861	Tubb2a	tubulin, beta 2A class IIA
ENSOCUG00000013171	ENSMUSG00000025869	28126	MGI:107862	Nop16	NOP16 nucleolar protein
ENSOCUG00000015692	ENSMUSG00000032777	233863	MGI:107887	Gtf3c1	general transcription factor III C 1
ENSOCUG00000011497	ENSMUSG00000061286	27998	MGI:107889	Exosc5	exosome component 5
ENSOCUG00000008203	ENSMUSG00000038279	110109	MGI:107891	Nop2	NOP2 nucleolar protein
ENSOCUG00000003351	ENSMUSG00000029672	27999	MGI:107892	Fam3c	family with sequence similarity 3, member C
ENSOCUG00000001956	ENSMUSG00000030347	28040	MGI:107893	D6Wsu163e	DNA segment, Chr 6, Wayne State University 163, expressed
ENSOCUG00000015554	ENSMUSG00000075703	28042	MGI:107898	Selenoi	selenoprotein I
ENSOCUG00000002492	ENSMUSG00000002944	12491	MGI:107899	Cd36	CD36 molecule
ENSOCUG00000025540	ENSMUSG00000032897	18046	MGI:107901	Nfyc	nuclear transcription factor-Y gamma
ENSOCUG00000029504	ENSMUSG00000027067	20833	MGI:107912	Ssrp1	structure specific recognition protein 1
ENSOCUG00000003783	ENSMUSG00000030846	21843	MGI:107913	Tial1	Tia1 cytotoxic granule-associated RNA binding protein-like 1
ENSOCUG00000011204	ENSMUSG00000071337	21841	MGI:107914	Tia1	cytotoxic granule-associated RNA binding protein 1
ENSOCUG00000001063	ENSMUSG00000029848	20899	MGI:107917	Stra8	stimulated by retinoic acid gene 8
ENSOCUG00000005191	ENSMUSG00000012282	20890	MGI:107924	Wnt8a	wingless-type MMTV integration site family, member 8A
ENSOCUG00000017477	ENSMUSG00000020580	19878	MGI:107926	Rock2	Rho-associated coiled-coil containing protein kinase 2
ENSOCUG00000004848	ENSMUSG00000024290	19877	MGI:107927	Rock1	Rho-associated coiled-coil containing protein kinase 1
ENSOCUG00000016942	ENSMUSG00000013584	19378	MGI:107928	Aldh1a2	aldehyde dehydrogenase family 1, subfamily A2
ENSOCUG00000015242	ENSMUSG00000028126	18720	MGI:107929	Pip5k1a	phosphatidylinositol-4-phosphate 5-kinase, type 1 alpha
ENSOCUG00000015811	ENSMUSG00000024867	18719	MGI:107930	Pip5k1b	phosphatidylinositol-4-phosphate 5-kinase, type 1 beta
ENSOCUG00000015445	ENSMUSG00000015837	18412	MGI:107931	Sqstm1	sequestosome 1
ENSOCUG00000004581	ENSMUSG00000021606	407785	MGI:107932	Ndufs6	NADH:ubiquinone oxidoreductase core subunit S6
ENSOCUG00000012282	ENSMUSG00000032221	17427	MGI:107933	Mns1	meiosis-specific nuclear structural protein 1
ENSOCUG00000000005	ENSMUSG00000054387	17248	MGI:107934	Mdm4	transformed mouse 3T3 cell double minute 4
ENSOCUG00000007510	ENSMUSG00000030029	16206	MGI:107935	Lrig1	leucine-rich repeats and immunoglobulin-like domains 1
ENSOCUG00000005255	ENSMUSG00000039217	16173	MGI:107936	Il18	interleukin 18
ENSOCUG00000013727	ENSMUSG00000026492	15278	MGI:107937	Tfb2m	transcription factor B2, mitochondrial
ENSOCUG00000001676	ENSMUSG00000029687	14056	MGI:107940	Ezh2	enhancer of zeste 2 polycomb repressive complex 2 subunit
ENSOCUG00000022231	ENSMUSG00000030208	13730	MGI:107941	Emp1	epithelial membrane protein 1
ENSOCUG00000013389	ENSMUSG00000019936	13516	MGI:107942	Epyc	epiphycan
ENSOCUG00000029169	ENSMUSG00000045817	12193	MGI:107945	Zfp36l2	zinc finger protein 36, C3H type-like 2
ENSOCUG00000003168	ENSMUSG00000021127	12192	MGI:107946	Zfp36l1	zinc finger protein 36, C3H type-like 1
ENSOCUG00000025690	ENSMUSG00000070424	11875	MGI:107948	Art5	ADP-ribosyltransferase 5
ENSOCUG00000003984	ENSMUSG00000079055	110893	MGI:107976	Slc8a3	solute carrier family 8 (sodium/calcium exchanger), member 3
ENSOCUG00000012446	ENSMUSG00000021288	16593	MGI:107978	Klc1	kinesin light chain 1
ENSOCUG00000015014	ENSMUSG00000020668	16570	MGI:107979	Kif3c	kinesin family member 3C
ENSOCUG00000002417	ENSMUSG00000032508	17874	MGI:108005	Myd88	myeloid differentiation primary response gene 88
ENSOCUG00000001027	ENSMUSG00000029736	18291	MGI:108011	Nobox	NOBOX oogenesis homeobox
ENSOCUG00000006058	ENSMUSG00000027395	20017	MGI:108014	Polr1b	polymerase (RNA) I polypeptide B
ENSOCUG00000009039	ENSMUSG00000049691	12020	MGI:108015	Nkx3-2	NK3 homeobox 2
ENSOCUG00000002581	ENSMUSG00000022314	19357	MGI:108016	Rad21	RAD21 cohesin complex component
ENSOCUG00000026699	ENSMUSG00000020585	17775	MGI:108017	Laptm4a	lysosomal-associated protein transmembrane 4A
ENSOCUG00000021232	ENSMUSG00000020591	18217	MGI:108018	Ntsr2	neurotensin receptor 2
ENSOCUG00000013874	ENSMUSG00000002064	20316	MGI:108019	Sdf2	stromal cell derived factor 2
ENSOCUG00000013315	ENSMUSG00000051159	12705	MGI:108023	Cited1	Cbp/p300-interacting transactivator with Glu/Asp-rich carboxy-terminal domain 1
ENSOCUG00000023725	ENSMUSG00000023070	19733	MGI:108024	Rgn	regucalcin
ENSOCUG00000012426	ENSMUSG00000032601	19087	MGI:108025	Prkar2a	protein kinase, cAMP dependent regulatory, type II alpha
ENSOCUG00000001874	ENSMUSG00000032409	245000	MGI:108028	Atr	ataxia telangiectasia and Rad3 related
ENSOCUG00000011795	ENSMUSG00000034533	20264	MGI:108029	Scn10a	sodium channel, voltage-gated, type X, alpha
ENSOCUG00000004239	ENSMUSG00000032115	12282	MGI:108030	Hyou1	hypoxia up-regulated 1
ENSOCUG00000008519	ENSMUSG00000021886	14744	MGI:108031	Gpr65	G-protein coupled receptor 65
ENSOCUG00000029519	ENSMUSG00000055540	13840	MGI:108034	Epha6	Eph receptor A6
ENSOCUG00000017764	ENSMUSG00000031380	14205	MGI:108037	Vegfd	vascular endothelial growth factor D
ENSOCUG00000002208	ENSMUSG00000038057	13168	MGI:108039	Dbil5	diazepam binding inhibitor-like 5
ENSOCUG00000009436	ENSMUSG00000005864	12789	MGI:108040	Cnga2	cyclic nucleotide gated channel alpha 2
ENSOCUG00000003672	ENSMUSG00000021277	22031	MGI:108041	Traf3	TNF receptor-associated factor 3
ENSOCUG00000015876	ENSMUSG00000027793	12427	MGI:108042	Ccna1	cyclin A1
ENSOCUG00000009246	ENSMUSG00000023333	14531	MGI:108045	Gcm1	glial cells missing homolog 1
ENSOCUG00000009774	ENSMUSG00000028581	16792	MGI:108046	Laptm5	lysosomal-associated protein transmembrane 5
ENSOCUG00000008945	ENSMUSG00000028416	12017	MGI:108047	Bag1	BCL2-associated athanogene 1
ENSOCUG00000002421	ENSMUSG00000033706	232187	MGI:108048	Smyd5	SET and MYND domain containing 5
ENSOCUG00000007361	ENSMUSG00000027198	14043	MGI:108050	Ext2	exostoses (multiple) 2
ENSOCUG00000011290	ENSMUSG00000024563	17126	MGI:108051	Smad2	SMAD family member 2
ENSOCUG00000011026	ENSMUSG00000089682	12050	MGI:108052	Bcl2l2	BCL2-like 2
ENSOCUG00000006377	ENSMUSG00000028057	19769	MGI:108053	Rit1	Ras-like without CAAX 1
ENSOCUG00000003652	ENSMUSG00000057455	19762	MGI:108054	Rit2	Ras-like without CAAX 2
ENSOCUG00000005893	ENSMUSG00000028565	18027	MGI:108056	Nfia	nuclear factor I/A
ENSOCUG00000022401	ENSMUSG00000029614	19988	MGI:108057	Rpl6	ribosomal protein L6
ENSOCUG00000009897	ENSMUSG00000030790	11535	MGI:108058	Adm	adrenomedullin
ENSOCUG00000009804	ENSMUSG00000029428	13852	MGI:108059	Stx2	syntaxin 2
ENSOCUG00000009580	ENSMUSG00000022996	22410	MGI:108061	Wnt10b	wingless-type MMTV integration site family, member 10B
ENSOCUG00000010373	ENSMUSG00000036432	20439	MGI:108062	Siah2	siah E3 ubiquitin protein ligase 2
ENSOCUG00000004814	ENSMUSG00000036840	20437	MGI:108064	Siah1a	siah E3 ubiquitin protein ligase 1A
ENSOCUG00000024883	ENSMUSG00000029380	14825	MGI:108068	Cxcl1	chemokine (C-X-C motif) ligand 1
ENSOCUG00000028042	ENSMUSG00000027715	12428	MGI:108069	Ccna2	cyclin A2
ENSOCUG00000029400	ENSMUSG00000030393	22775	MGI:108070	Zik1	zinc finger protein interacting with K protein 1
ENSOCUG00000016033	ENSMUSG00000026167	22409	MGI:108071	Wnt10a	wingless-type MMTV integration site family, member 10A
ENSOCUG00000012011	ENSMUSG00000027164	22034	MGI:108072	Traf6	TNF receptor-associated factor 6
ENSOCUG00000001434	ENSMUSG00000021036	20773	MGI:108074	Sptlc2	serine palmitoyltransferase, long chain base subunit 2
ENSOCUG00000013176	ENSMUSG00000001761	319757	MGI:108075	Smo	smoothened, frizzled class receptor
ENSOCUG00000009455	ENSMUSG00000033386	20321	MGI:108076	Frrs1	ferric-chelate reductase 1
ENSOCUG00000010060	ENSMUSG00000032336	20320	MGI:108077	Nptn	neuroplastin
ENSOCUG00000016660	ENSMUSG00000027996	20319	MGI:108078	Sfrp2	secreted frizzled-related protein 2
ENSOCUG00000000092	ENSMUSG00000000753	20317	MGI:108080	Serpinf1	serine (or cysteine) peptidase inhibitor, clade F, member 1
ENSOCUG00000015127	ENSMUSG00000020570	19027	MGI:108081	Sypl	synaptophysin-like protein
ENSOCUG00000004492	ENSMUSG00000009545	16535	MGI:108083	Kcnq1	potassium voltage-gated channel, subfamily Q, member 1
ENSOCUG00000013941	ENSMUSG00000038241	16328	MGI:108084	Cep250	centrosomal protein 250
ENSOCUG00000016289	ENSMUSG00000031613	15446	MGI:108085	Hpgd	hydroxyprostaglandin dehydrogenase 15 (NAD)
ENSOCUG00000003674	ENSMUSG00000028800	433759	MGI:108086	Hdac1	histone deacetylase 1
ENSOCUG00000004243	ENSMUSG00000001380	15115	MGI:108087	Hars	histidyl-tRNA synthetase
ENSOCUG00000003271	ENSMUSG00000031714	14388	MGI:108088	Gab1	growth factor receptor bound protein 2-associated protein 1
ENSOCUG00000025110	ENSMUSG00000021131	13877	MGI:108089	Erh	ERH mRNA splicing and mitosis factor
ENSOCUG00000014670	ENSMUSG00000062762	13663	MGI:108090	Ei24	etoposide induced 2.4 mRNA
ENSOCUG00000015992	ENSMUSG00000031955	12927	MGI:108091	Bcar1	breast cancer anti-estrogen resistance 1
ENSOCUG00000014862	ENSMUSG00000024381	30948	MGI:108092	Bin1	bridging integrator 1
ENSOCUG00000016266	ENSMUSG00000004446	12122	MGI:108093	Bid	BH3 interacting domain death agonist
ENSOCUG00000029135	ENSMUSG00000031374	22754	MGI:108094	Zfp92	zinc finger protein 92
ENSOCUG00000008404	ENSMUSG00000059213	13199	MGI:108101	Ddn	dendrin
ENSOCUG00000008265	ENSMUSG00000038145	20623	MGI:108104	Snrk	SNF related kinase
ENSOCUG00000008521	ENSMUSG00000051391	22628	MGI:108109	Ywhag	tyrosine 3-monooxygenase/tryptophan 5-monooxygenase activation protein, gamma polypeptide
ENSOCUG00000006131	ENSMUSG00000029309	13602	MGI:108110	Sparcl1	SPARC-like 1
ENSOCUG00000010040	ENSMUSG00000031766	20497	MGI:108114	Slc12a3	solute carrier family 12, member 3
ENSOCUG00000000882	ENSMUSG00000001964	13726	MGI:108117	Emd	emerin
ENSOCUG00000008464	ENSMUSG00000029334	19092	MGI:108173	Prkg2	protein kinase, cGMP-dependent, type II
ENSOCUG00000011473	ENSMUSG00000052920	19091	MGI:108174	Prkg1	protein kinase, cGMP-dependent, type I
ENSOCUG00000027912	ENSMUSG00000053198	19153	MGI:108176	Prx	periaxin
ENSOCUG00000014651	ENSMUSG00000042699	13211	MGI:108177	Dhx9	DEAH (Asp-Glu-Ala-His) box polypeptide 9
ENSOCUG00000014882	ENSMUSG00000007338	18120	MGI:108180	Mrpl49	mitochondrial ribosomal protein L49
ENSOCUG00000010185	ENSMUSG00000053644	110695	MGI:108186	Aldh7a1	aldehyde dehydrogenase family 7, member A1
ENSOCUG00000012767	ENSMUSG00000067942	224585	MGI:108187	Zfp160	zinc finger protein 160
ENSOCUG00000022490	ENSMUSG00000056851	18521	MGI:108202	Pcbp2	poly(rC) binding protein 2
ENSOCUG00000011791	ENSMUSG00000021408	19766	MGI:108212	Ripk1	receptor (TNFRSF)-interacting serine-threonine kinase 1
ENSOCUG00000016313	ENSMUSG00000034674	21665	MGI:108247	Tdg	thymine DNA glycosylase
ENSOCUG00000016628	ENSMUSG00000005575	22192	MGI:108278	Ube2m	ubiquitin-conjugating enzyme E2M
ENSOCUG00000005754	ENSMUSG00000029528	19303	MGI:108295	Pxn	paxillin
ENSOCUG00000007369	ENSMUSG00000040310	11695	MGI:108359	Alx4	aristaless-like homeobox 4
ENSOCUG00000002299	ENSMUSG00000022995	13800	MGI:108360	Enah	ENAH actin regulator
ENSOCUG00000004422	ENSMUSG00000020423	12227	MGI:108384	Btg2	B cell translocation gene 2, anti-proliferative
ENSOCUG00000010802	ENSMUSG00000049091	20768	MGI:108388	Sephs2	selenophosphate synthetase 2
ENSOCUG00000017111	ENSMUSG00000034311	16571	MGI:108389	Kif4	kinesin family member 4
ENSOCUG00000010466	ENSMUSG00000021693	16563	MGI:108390	Kif2a	kinesin family member 2A
ENSOCUG00000001772	ENSMUSG00000027397	20515	MGI:108392	Slc20a1	solute carrier family 20, member 1
ENSOCUG00000002109	ENSMUSG00000037440	22361	MGI:108395	Vnn1	vanin 1
ENSOCUG00000005955	ENSMUSG00000026281	21915	MGI:108396	Dtymk	deoxythymidylate kinase
ENSOCUG00000015210	ENSMUSG00000017801	21428	MGI:108398	Mlx	MAX-like protein X
ENSOCUG00000010285	ENSMUSG00000041852	21411	MGI:108399	Tcf20	transcription factor 20
ENSOCUG00000016932	ENSMUSG00000029207	11787	MGI:108405	Apbb2	amyloid beta (A4) precursor protein-binding, family B, member 2
ENSOCUG00000027089	ENSMUSG00000026475	19734	MGI:108407	Rgs16	regulator of G-protein signaling 16
ENSOCUG00000024520	ENSMUSG00000042671	67792	MGI:108408	Rgs8	regulator of G-protein signaling 8
ENSOCUG00000005204	ENSMUSG00000038530	19736	MGI:108409	Rgs4	regulator of G-protein signaling 4
ENSOCUG00000010571	ENSMUSG00000026126	19253	MGI:108410	Ptpn18	protein tyrosine phosphatase, non-receptor type 18
ENSOCUG00000008409	ENSMUSG00000067713	19082	MGI:108411	Prkag1	protein kinase, AMP-activated, gamma 1 non-catalytic subunit
ENSOCUG00000004472	ENSMUSG00000021759	19012	MGI:108412	Plpp1	phospholipid phosphatase 1
ENSOCUG00000009113	ENSMUSG00000004347	18575	MGI:108413	Pde1c	phosphodiesterase 1C
ENSOCUG00000006470	ENSMUSG00000005447	18476	MGI:108414	Pafah1b3	platelet-activating factor acetylhydrolase, isoform 1b, subunit 3
ENSOCUG00000016275	ENSMUSG00000028004	18167	MGI:108418	Npy2r	neuropeptide Y receptor Y2
ENSOCUG00000001009	ENSMUSG00000015839	18024	MGI:108420	Nfe2l2	nuclear factor, erythroid derived 2, like 2
ENSOCUG00000015956	ENSMUSG00000030263	16970	MGI:108424	Lrmp	lymphoid-restricted membrane protein
ENSOCUG00000002763	ENSMUSG00000063077	16561	MGI:108426	Kif1b	kinesin family member 1B
ENSOCUG00000026842	ENSMUSG00000038668	14745	MGI:108429	Lpar1	lysophosphatidic acid receptor 1
ENSOCUG00000026694	ENSMUSG00000025586	12877	MGI:108442	Cpeb1	cytoplasmic polyadenylation element binding protein 1
ENSOCUG00000015518	ENSMUSG00000038357	12796	MGI:108443	Camp	cathelicidin antimicrobial peptide
ENSOCUG00000006208	ENSMUSG00000022504	12265	MGI:108445	Ciita	class II transactivator
ENSOCUG00000000086	ENSMUSG00000032249	11737	MGI:108447	Anp32a	acidic (leucine-rich) nuclear phosphoprotein 32 family, member A
ENSOCUG00000003722	ENSMUSG00000022309	11600	MGI:108448	Angpt1	angiopoietin 1
ENSOCUG00000000120	ENSMUSG00000029778	11517	MGI:108449	Adcyap1r1	adenylate cyclase activating polypeptide 1 receptor 1
ENSOCUG00000007904	ENSMUSG00000005580	11515	MGI:108450	Adcy9	adenylate cyclase 9
ENSOCUG00000014453	ENSMUSG00000020532	107476	MGI:108451	Acaca	acetyl-Coenzyme A carboxylase alpha
ENSOCUG00000016469	ENSMUSG00000024806	77836	MGI:108454	Mlana	melan-A
ENSOCUG00000010172	ENSMUSG00000024096	19765	MGI:108466	Ralbp1	ralA binding protein 1
ENSOCUG00000027209	ENSMUSG00000022885	20440	MGI:108470	St6gal1	beta galactoside alpha 2,6 sialyltransferase 1
ENSOCUG00000006699	ENSMUSG00000022681	18203	MGI:108471	Ntan1	N-terminal Asn amidase
ENSOCUG00000025264	ENSMUSG00000007989	14365	MGI:108476	Fzd3	frizzled class receptor 3
ENSOCUG00000004569	ENSMUSG00000021866	11744	MGI:108481	Anxa11	annexin A11
ENSOCUG00000011627	ENSMUSG00000034987	15466	MGI:108482	Hrh2	histamine receptor H2
ENSOCUG00000025171	ENSMUSG00000017119	17966	MGI:108498	Nbr1	NBR1, autophagy cargo receptor
ENSOCUG00000029202	ENSMUSG00000032517	17433	MGI:108511	Mobp	myelin-associated oligodendrocytic basic protein
ENSOCUG00000002464	ENSMUSG00000029836	12417	MGI:108515	Cbx3	chromobox 3
ENSOCUG00000005447	ENSMUSG00000031024	76954	MGI:108517	St5	suppression of tumorigenicity 5
ENSOCUG00000025760	ENSMUSG00000041420	17537	MGI:108519	Meis3	Meis homeobox 3
ENSOCUG00000006445	ENSMUSG00000049791	14366	MGI:108520	Fzd4	frizzled class receptor 4
ENSOCUG00000017204	ENSMUSG00000028519	13131	MGI:108554	Dab1	disabled 1
ENSOCUG00000023941	ENSMUSG00000037902	19261	MGI:108563	Sirpa	signal-regulatory protein alpha
ENSOCUG00000009906	ENSMUSG00000027210	17536	MGI:108564	Meis2	Meis homeobox 2
ENSOCUG00000011457	ENSMUSG00000041075	14369	MGI:108570	Fzd7	frizzled class receptor 7
ENSOCUG00000027916	ENSMUSG00000045005	14367	MGI:108571	Fzd5	frizzled class receptor 5
ENSOCUG00000017884	ENSMUSG00000031520	22341	MGI:109124	Vegfc	vascular endothelial growth factor C
ENSOCUG00000015952	ENSMUSG00000030317	110595	MGI:109125	Timp4	tissue inhibitor of metalloproteinase 4
ENSOCUG00000000957	ENSMUSG00000035686	21835	MGI:109126	Thrsp	thyroid hormone responsive
ENSOCUG00000012769	ENSMUSG00000022010	21807	MGI:109127	Tsc22d1	TSC22 domain family, member 1
ENSOCUG00000006841	ENSMUSG00000017950	15378	MGI:109128	Hnf4a	hepatic nuclear factor 4, alpha
ENSOCUG00000023479	ENSMUSG00000036980	21343	MGI:109129	Taf6	TATA-box binding protein associated factor 6
ENSOCUG00000015880	ENSMUSG00000024966	20867	MGI:109130	Stip1	stress-induced phosphoprotein 1
ENSOCUG00000005708	ENSMUSG00000014813	20855	MGI:109131	Stc1	stanniocalcin 1
ENSOCUG00000000265	ENSMUSG00000033419	20616	MGI:109132	Snap91	synaptosomal-associated protein 91
ENSOCUG00000003533	ENSMUSG00000021708	19418	MGI:109137	Rasgrf2	RAS protein-specific guanine nucleotide-releasing factor 2
ENSOCUG00000017506	ENSMUSG00000079523	19240	MGI:109146	Tmsb10	thymosin, beta 10
ENSOCUG00000005953	ENSMUSG00000049112	18430	MGI:109147	Oxtr	oxytocin receptor
ENSOCUG00000002040	ENSMUSG00000073897	18314	MGI:109148	Olfr17	olfactory receptor 17
ENSOCUG00000002426	ENSMUSG00000029126	18196	MGI:109149	Nsg1	neuron specific gene family member 1
ENSOCUG00000016100	ENSMUSG00000000282	17428	MGI:109150	Mnt	max binding protein
ENSOCUG00000009598	ENSMUSG00000001870	268977	MGI:109151	Ltbp1	latent transforming growth factor beta binding protein 1
ENSOCUG00000006305	ENSMUSG00000020697	16882	MGI:109152	Lig3	ligase III, DNA, ATP-dependent
ENSOCUG00000010650	ENSMUSG00000021843	16709	MGI:109153	Ktn1	kinectin 1
ENSOCUG00000007885	ENSMUSG00000027827	16497	MGI:109155	Kcnab1	potassium voltage-gated channel, shaker-related subfamily, beta member 1
ENSOCUG00000015011	ENSMUSG00000032318	104360	MGI:109156	Isl2	insulin related protein 2 (islet 2)
ENSOCUG00000016044	ENSMUSG00000001566	15285	MGI:109160	Mnx1	motor neuron and pancreas homeobox 1
ENSOCUG00000007893	ENSMUSG00000024978	14732	MGI:109162	Gpam	glycerol-3-phosphate acyltransferase, mitochondrial
ENSOCUG00000003974	ENSMUSG00000063594	14709	MGI:109163	Gng8	guanine nucleotide binding protein (G protein), gamma 8
ENSOCUG00000017038	ENSMUSG00000029663	14699	MGI:109165	Gngt1	guanine nucleotide binding protein (G protein), gamma transducing activity polypeptide 1
ENSOCUG00000004215	ENSMUSG00000042826	14166	MGI:109167	Fgf11	fibroblast growth factor 11
ENSOCUG00000001439	ENSMUSG00000070047	14107	MGI:109168	Fat1	FAT atypical cadherin 1
ENSOCUG00000014904	ENSMUSG00000024140	13819	MGI:109169	Epas1	endothelial PAS domain protein 1
ENSOCUG00000022074	ENSMUSG00000053268	666279	MGI:109172	Dspp	dentin sialophosphoprotein
ENSOCUG00000012534	ENSMUSG00000044322	13505	MGI:109173	Dsc1	desmocollin 1
ENSOCUG00000012721	ENSMUSG00000022150	13132	MGI:109175	Dab2	disabled 2, mitogen-responsive phosphoprotein
ENSOCUG00000016639	ENSMUSG00000028607	12896	MGI:109176	Cpt2	carnitine palmitoyltransferase 2
ENSOCUG00000014601	ENSMUSG00000032679	12509	MGI:109177	Cd59a	CD59a antigen
ENSOCUG00000012713	ENSMUSG00000031137	14168	MGI:109178	Fgf13	fibroblast growth factor 13
ENSOCUG00000013836	ENSMUSG00000062480	224530	MGI:109182	Acat3	acetyl-Coenzyme A acetyltransferase 3
ENSOCUG00000007581	ENSMUSG00000022523	14167	MGI:109183	Fgf12	fibroblast growth factor 12
ENSOCUG00000010693	ENSMUSG00000037362	18133	MGI:109185	Nov	nephroblastoma overexpressed gene
ENSOCUG00000021337	ENSMUSG00000071715	17972	MGI:109186	Ncf4	neutrophil cytosolic factor 4
ENSOCUG00000016630	ENSMUSG00000022629	16564	MGI:109188	Kif21a	kinesin family member 21A
ENSOCUG00000008820	ENSMUSG00000025551	14169	MGI:109189	Fgf14	fibroblast growth factor 14
ENSOCUG00000014424	ENSMUSG00000006611	15216	MGI:109191	Hfe	hemochromatosis
ENSOCUG00000017871	ENSMUSG00000052374	11472	MGI:109192	Actn2	actinin alpha 2
ENSOCUG00000007090	ENSMUSG00000018965	22629	MGI:109194	Ywhah	tyrosine 3-monooxygenase/tryptophan 5-monooxygenase activation protein, eta polypeptide
ENSOCUG00000002822	ENSMUSG00000003934	13643	MGI:109196	Efnb3	ephrin B3
ENSOCUG00000003475	ENSMUSG00000020091	13688	MGI:109198	Eif4ebp2	eukaryotic translation initiation factor 4E binding protein 2
ENSOCUG00000025249	ENSMUSG00000031887	71609	MGI:109200	Tradd	TNFRSF1A-associated via death domain
ENSOCUG00000014428	ENSMUSG00000051147	17961	MGI:109201	Nat2	N-acetyltransferase 2 (arylamine N-acetyltransferase)
ENSOCUG00000012069	ENSMUSG00000031788	16582	MGI:109202	Kifc3	kinesin family member C3
ENSOCUG00000016061	ENSMUSG00000001988	18142	MGI:109205	Npas1	neuronal PAS domain protein 1
ENSOCUG00000013326	ENSMUSG00000005610	13690	MGI:109207	Eif4g2	eukaryotic translation initiation factor 4, gamma 2
ENSOCUG00000017056	ENSMUSG00000004591	109333	MGI:109211	Pkn2	protein kinase N2
ENSOCUG00000002384	ENSMUSG00000026077	18143	MGI:109232	Npas2	neuronal PAS domain protein 2
ENSOCUG00000003606	ENSMUSG00000041642	16565	MGI:109234	Kif21b	kinesin family member 21B
ENSOCUG00000004970	ENSMUSG00000038855	320404	MGI:109235	Itpkb	inositol 1,4,5-trisphosphate 3-kinase B
ENSOCUG00000026246	ENSMUSG00000042541	20422	MGI:109238	Sem1	SEM1, 26S proteasome complex subunit
ENSOCUG00000010687	ENSMUSG00000028931	16498	MGI:109239	Kcnab2	potassium voltage-gated channel, shaker-related subfamily, beta member 2
ENSOCUG00000002610	ENSMUSG00000038965	22195	MGI:109240	Ube2l3	ubiquitin-conjugating enzyme E2L 3
ENSOCUG00000004072	ENSMUSG00000002249	21678	MGI:109241	Tead3	TEA domain family member 3
ENSOCUG00000011880	ENSMUSG00000021395	20729	MGI:109242	Spin1	spindlin 1
ENSOCUG00000022262	ENSMUSG00000025425	225742	MGI:109243	St8sia5	ST8 alpha-N-acetyl-neuraminide alpha-2,8-sialyltransferase 5
ENSOCUG00000012955	ENSMUSG00000021451	20354	MGI:109244	Sema4d	sema domain, immunoglobulin domain (Ig), transmembrane domain (TM) and short cytoplasmic domain, (semaphorin) 4D
ENSOCUG00000017309	ENSMUSG00000026322	15562	MGI:109246	Htr4	5 hydroxytryptamine (serotonin) receptor 4
ENSOCUG00000023877	ENSMUSG00000025408	13198	MGI:109247	Ddit3	DNA-damage inducible transcript 3
ENSOCUG00000003930	ENSMUSG00000074939	213788	MGI:109248	Chrm5	cholinergic receptor, muscarinic 5
ENSOCUG00000016362	ENSMUSG00000022893	11504	MGI:109249	Adamts1	a disintegrin-like and metallopeptidase (reprolysin type) with thrombospondin type 1 motif, 1
ENSOCUG00000003347	ENSMUSG00000026121	20353	MGI:109252	Sema4c	sema domain, immunoglobulin domain (Ig), transmembrane domain (TM) and short cytoplasmic domain, (semaphorin) 4C
ENSOCUG00000017097	ENSMUSG00000021645	20595	MGI:109257	Smn1	survival motor neuron 1
ENSOCUG00000017830	ENSMUSG00000020289	17168	MGI:109258	Nprl3	nitrogen permease regulator-like 3
ENSOCUG00000023529	ENSMUSG00000026374	22099	MGI:109263	Tsn	translin
ENSOCUG00000015236	ENSMUSG00000023132	14938	MGI:109266	Gzma	granzyme A
ENSOCUG00000029697	ENSMUSG00000015437	14939	MGI:109267	Gzmb	granzyme B
ENSOCUG00000007382	ENSMUSG00000047492	16326	MGI:109269	Inhbe	inhibin beta-E
ENSOCUG00000013106	ENSMUSG00000032528	22354	MGI:109272	Vipr1	vasoactive intestinal peptide receptor 1
ENSOCUG00000016607	ENSMUSG00000005566	21849	MGI:109274	Trim28	tripartite motif-containing 28
ENSOCUG00000007274	ENSMUSG00000029833	21848	MGI:109275	Trim24	tripartite motif-containing 24
ENSOCUG00000009017	ENSMUSG00000021390	18295	MGI:109278	Ogn	osteoglycin
ENSOCUG00000001269	ENSMUSG00000116207	18115	MGI:109279	Nnt	nicotinamide nucleotide transhydrogenase
ENSOCUG00000009239	ENSMUSG00000036639	17766	MGI:109280	Nudt1	nudix (nucleoside diphosphate linked moiety X)-type motif 1
ENSOCUG00000013466	ENSMUSG00000026991	227937	MGI:109281	Pkp4	plakophilin 4
ENSOCUG00000014417	ENSMUSG00000026207	11790	MGI:109282	Speg	SPEG complex locus
ENSOCUG00000022971	ENSMUSG00000021576	18570	MGI:109283	Pdcd6	programmed cell death 6
ENSOCUG00000021898	ENSMUSG00000010609	19165	MGI:109284	Psen2	presenilin 2
ENSOCUG00000025001	ENSMUSG00000020380	19360	MGI:109292	Rad50	RAD50 double strand break repair protein
ENSOCUG00000013585	ENSMUSG00000004709	18106	MGI:109294	Cd244a	CD244 molecule A
ENSOCUG00000029398	ENSMUSG00000024565	20689	MGI:109295	Sall3	spalt like transcription factor 3
ENSOCUG00000015771	ENSMUSG00000022351	20775	MGI:109296	Sqle	squalene epoxidase
ENSOCUG00000029033	ENSMUSG00000017002	20568	MGI:109297	Slpi	secretory leukocyte peptidase inhibitor
ENSOCUG00000014252	ENSMUSG00000016528	17164	MGI:109298	Mapkapk2	MAP kinase-activated protein kinase 2
ENSOCUG00000014984	ENSMUSG00000031783	20021	MGI:109299	Polr2c	polymerase (RNA) II (DNA directed) polypeptide C
ENSOCUG00000011531	ENSMUSG00000021111	18789	MGI:109301	Papola	poly (A) polymerase alpha
ENSOCUG00000012381	ENSMUSG00000075066	18331	MGI:109303	Olfr32	olfactory receptor 32
ENSOCUG00000025364	ENSMUSG00000072707	18330	MGI:109304	Olfr31	olfactory receptor 31
ENSOCUG00000016841	ENSMUSG00000043314	18329	MGI:109305	Olfr30	olfactory receptor 30
ENSOCUG00000016617	ENSMUSG00000054141	18322	MGI:109311	Olfr24	olfactory receptor 24
ENSOCUG00000025644	ENSMUSG00000048101	18316	MGI:109316	Olfr19	olfactory receptor 19
ENSOCUG00000017611	ENSMUSG00000066896	18315	MGI:109317	Olfr18	olfactory receptor 18
ENSOCUG00000017371	ENSMUSG00000090841	17904	MGI:109318	Myl6	myosin, light polypeptide 6, alkali, smooth muscle and non-muscle
ENSOCUG00000009655	ENSMUSG00000019846	16775	MGI:109321	Lama4	laminin, alpha 4
ENSOCUG00000016003	ENSMUSG00000033998	16525	MGI:109322	Kcnk1	potassium channel, subfamily K, member 1
ENSOCUG00000008582	ENSMUSG00000026228	15559	MGI:109323	Htr2b	5-hydroxytryptamine (serotonin) receptor 2B
ENSOCUG00000015189	ENSMUSG00000031077	14082	MGI:109324	Fadd	Fas (TNFRSF6)-associated via death domain
ENSOCUG00000021021	ENSMUSG00000031443	14068	MGI:109325	F7	coagulation factor VII
ENSOCUG00000002541	ENSMUSG00000078566	12176	MGI:109326	Bnip3	BCL2/adenovirus E1B interacting protein 3
ENSOCUG00000006277	ENSMUSG00000011958	12175	MGI:109327	Bnip2	BCL2/adenovirus E1B interacting protein 2
ENSOCUG00000000040	ENSMUSG00000024191	224630	MGI:109328	Bnip1	BCL2/adenovirus E1B interacting protein 1
ENSOCUG00000027555	ENSMUSG00000044542	19127	MGI:109330	Prop1	paired like homeodomain factor 1
ENSOCUG00000005189	ENSMUSG00000020844	18230	MGI:109331	Nxn	nucleoredoxin
ENSOCUG00000016827	ENSMUSG00000030199	14011	MGI:109336	Etv6	ets variant 6
ENSOCUG00000016878	ENSMUSG00000041147	12190	MGI:109337	Brca2	breast cancer 2, early onset
ENSOCUG00000024485	ENSMUSG00000041351	110351	MGI:109338	Rap1gap	Rap1 GTPase-activating protein
ENSOCUG00000008020	ENSMUSG00000028886	14050	MGI:109339	Eya3	EYA transcriptional coactivator and phosphatase 3
ENSOCUG00000012685	ENSMUSG00000028023	18741	MGI:109340	Pitx2	paired-like homeodomain transcription factor 2
ENSOCUG00000002658	ENSMUSG00000017897	14049	MGI:109341	Eya2	EYA transcriptional coactivator and phosphatase 2
ENSOCUG00000015451	ENSMUSG00000026427	16865	MGI:109342	Eif2d	eukaryotic translation initiation factor 2D
ENSOCUG00000007730	ENSMUSG00000041782	16763	MGI:109343	Lad1	ladinin
ENSOCUG00000009052	ENSMUSG00000025932	14048	MGI:109344	Eya1	EYA transcriptional coactivator and phosphatase 1
ENSOCUG00000013302	ENSMUSG00000005609	22083	MGI:109345	Ctr9	CTR9 homolog, Paf1/RNA polymerase II complex component
ENSOCUG00000005592	ENSMUSG00000036446	17022	MGI:109347	Lum	lumican
ENSOCUG00000012156	ENSMUSG00000027104	11909	MGI:109349	Atf2	activating transcription factor 2
ENSOCUG00000011360	ENSMUSG00000006576	20536	MGI:109350	Slc4a3	solute carrier family 4 (anion exchanger), member 3
ENSOCUG00000003145	ENSMUSG00000029591	22256	MGI:109352	Ung	uracil DNA glycosylase
ENSOCUG00000025709	ENSMUSG00000005262	22230	MGI:109353	Ufd1	ubiquitin recognition factor in ER-associated degradation 1
ENSOCUG00000012591	ENSMUSG00000033685	22228	MGI:109354	Ucp2	uncoupling protein 2 (mitochondrial, proton carrier)
ENSOCUG00000017306	ENSMUSG00000007207	20907	MGI:109355	Stx1a	syntaxin 1A (brain)
ENSOCUG00000010995	ENSMUSG00000027287	20619	MGI:109356	Snap23	synaptosomal-associated protein 23
ENSOCUG00000012639	ENSMUSG00000028266	16911	MGI:109360	Lmo4	LIM domain only 4
ENSOCUG00000026324	ENSMUSG00000067614	16679	MGI:109362	Krt86	keratin 86
ENSOCUG00000008629	ENSMUSG00000037624	16526	MGI:109366	Kcnk2	potassium channel, subfamily K, member 2
ENSOCUG00000017724	ENSMUSG00000062867	23918	MGI:109367	Impdh2	inosine monophosphate dehydrogenase 2
ENSOCUG00000028062	ENSMUSG00000090019	16205	MGI:109368	Gimap1	GTPase, IMAP family member 1
ENSOCUG00000002445	ENSMUSG00000028759	15441	MGI:109369	Hp1bp3	heterochromatin protein 1, binding protein 3
ENSOCUG00000013345	ENSMUSG00000009575	12419	MGI:109372	Cbx5	chromobox 5
ENSOCUG00000006018	ENSMUSG00000004070	15369	MGI:109373	Hmox2	heme oxygenase 2
ENSOCUG00000027963	ENSMUSG00000055978	14344	MGI:109374	Fut2	fucosyltransferase 2
ENSOCUG00000017168	ENSMUSG00000008461	14343	MGI:109375	Fut1	fucosyltransferase 1
ENSOCUG00000015119	ENSMUSG00000028661	13842	MGI:109378	Epha8	Eph receptor A8
ENSOCUG00000001177	ENSMUSG00000022969	16155	MGI:109380	Il10rb	interleukin 10 receptor, beta
ENSOCUG00000005465	ENSMUSG00000023087	12457	MGI:109382	Noct	nocturnin
ENSOCUG00000011041	ENSMUSG00000025076	12369	MGI:109383	Casp7	caspase 7
ENSOCUG00000017424	ENSMUSG00000026628	11910	MGI:109384	Atf3	activating transcription factor 3
ENSOCUG00000007230	ENSMUSG00000024081	12607	MGI:109386	Cebpz	CCAAT/enhancer binding protein zeta
ENSOCUG00000005083	ENSMUSG00000021055	13983	MGI:109392	Esr2	estrogen receptor 2 (beta)
ENSOCUG00000004499	ENSMUSG00000006574	20533	MGI:109393	Slc4a1	solute carrier family 4 (anion exchanger), member 1
ENSOCUG00000017583	ENSMUSG00000063550	269966	MGI:109404	Nup98	nucleoporin 98
ENSOCUG00000015884	ENSMUSG00000079516	19694	MGI:109408	Reg3a	regenerating islet-derived 3 alpha
ENSOCUG00000009797	ENSMUSG00000028125	11304	MGI:109424	Abca4	ATP-binding cassette, sub-family A (ABC1), member 4
ENSOCUG00000004527	ENSMUSG00000032174	15898	MGI:109430	Icam5	intercellular adhesion molecule 5, telencephalin
ENSOCUG00000014334	ENSMUSG00000026768	241226	MGI:109442	Itga8	integrin alpha 8
ENSOCUG00000024468	ENSMUSG00000042535	14904	MGI:109443	Gtpbp1	GTP binding protein 1
ENSOCUG00000027142	ENSMUSG00000052301	13446	MGI:109446	Doc2a	double C2, alpha
ENSOCUG00000008983	ENSMUSG00000005698	13018	MGI:109447	Ctcf	CCCTC-binding factor
ENSOCUG00000010585	ENSMUSG00000026124	12627	MGI:109448	Cfc1	cripto, FRL-1, cryptic family 1
ENSOCUG00000005650	ENSMUSG00000067199	14296	MGI:109450	Frat1	frequently rearranged in advanced T cell lymphomas
ENSOCUG00000017920	ENSMUSG00000031681	17125	MGI:109452	Smad1	SMAD family member 1
ENSOCUG00000017819	ENSMUSG00000056342	17847	MGI:109473	Usp34	ubiquitin specific peptidase 34
ENSOCUG00000001093	ENSMUSG00000051355	17846	MGI:109474	Commd1	COMM domain containing 1
ENSOCUG00000011985	ENSMUSG00000034656	12286	MGI:109482	Cacna1a	calcium channel, voltage-dependent, P/Q type, alpha 1A subunit
ENSOCUG00000000734	ENSMUSG00000022285	22631	MGI:109484	Ywhaz	tyrosine 3-monooxygenase/tryptophan 5-monooxygenase activation protein, zeta polypeptide
ENSOCUG00000000986	ENSMUSG00000036961	22423	MGI:109485	Wnt8b	wingless-type MMTV integration site family, member 8B
ENSOCUG00000026668	ENSMUSG00000024217	20630	MGI:109489	Snrpc	U1 small nuclear ribonucleoprotein C
ENSOCUG00000006016	ENSMUSG00000071708	20603	MGI:109490	Sms	spermine synthase
ENSOCUG00000017341	ENSMUSG00000040652	18247	MGI:109492	Oaz2	ornithine decarboxylase antizyme 2
ENSOCUG00000002932	ENSMUSG00000031104	19337	MGI:109493	Rab33a	RAB33A, member RAS oncogene family
ENSOCUG00000000145	ENSMUSG00000056749	18030	MGI:109495	Nfil3	nuclear factor, interleukin 3, regulated
ENSOCUG00000025803	ENSMUSG00000001123	16859	MGI:109496	Lgals9	lectin, galactose binding, soluble 9
ENSOCUG00000027939	ENSMUSG00000026853	12908	MGI:109501	Crat	carnitine acetyltransferase
ENSOCUG00000007832	ENSMUSG00000040452	215654	MGI:109503	Cdh12	cadherin 12
ENSOCUG00000020975	ENSMUSG00000005054	13014	MGI:109514	Cstb	cystatin B
ENSOCUG00000027260	ENSMUSG00000021795	20390	MGI:109515	Sftpd	surfactant associated protein D
ENSOCUG00000002024	ENSMUSG00000022097	20389	MGI:109517	Sftpc	surfactant associated protein C
ENSOCUG00000014929	ENSMUSG00000021789	20387	MGI:109518	Sftpa1	surfactant associated protein A1
ENSOCUG00000016921	ENSMUSG00000014850	17686	MGI:109519	Msh3	mutS homolog 3
ENSOCUG00000009976	ENSMUSG00000034997	15558	MGI:109521	Htr2a	5-hydroxytryptamine (serotonin) receptor 2A
ENSOCUG00000015037	ENSMUSG00000032854	22239	MGI:109522	Ugt8a	UDP galactosyltransferase 8A
ENSOCUG00000009245	ENSMUSG00000041710	22067	MGI:109524	Trpc5	transient receptor potential cation channel, subfamily C, member 5
ENSOCUG00000012256	ENSMUSG00000027748	22066	MGI:109525	Trpc4	transient receptor potential cation channel, subfamily C, member 4
ENSOCUG00000009487	ENSMUSG00000027716	22065	MGI:109526	Trpc3	transient receptor potential cation channel, subfamily C, member 3
ENSOCUG00000017709	ENSMUSG00000032839	22063	MGI:109528	Trpc1	transient receptor potential cation channel, subfamily C, member 1
ENSOCUG00000004593	ENSMUSG00000024826	19708	MGI:109529	Dpf2	D4, zinc and double PHD fingers family 2
ENSOCUG00000025484	ENSMUSG00000024137	13560	MGI:109530	E4f1	E4F transcription factor 1
ENSOCUG00000027096	ENSMUSG00000019471	12539	MGI:109531	Cdc37	cell division cycle 37
ENSOCUG00000014697	ENSMUSG00000022863	12228	MGI:109532	Btg3	B cell translocation gene 3
ENSOCUG00000016847	ENSMUSG00000031333	11306	MGI:109533	Abcb7	ATP-binding cassette, sub-family B (MDR/TAP), member 7
ENSOCUG00000011089	ENSMUSG00000021922	16427	MGI:109536	Itih4	inter alpha-trypsin inhibitor, heavy chain 4
ENSOCUG00000021685	ENSMUSG00000028971	12854	MGI:109538	Cort	cortistatin
ENSOCUG00000005747	ENSMUSG00000040690	107581	MGI:1095396	Col16a1	collagen, type XVI, alpha 1
ENSOCUG00000024251	ENSMUSG00000022323	15473	MGI:1095401	Rida	reactive intermediate imine deaminase A homolog
ENSOCUG00000003512	ENSMUSG00000018169	17305	MGI:1095404	Mfng	MFNG O-fucosylpeptide 3-beta-N-acetylglucosaminyltransferase
ENSOCUG00000012489	ENSMUSG00000028681	19207	MGI:1095405	Ptch2	patched 2
ENSOCUG00000022998	ENSMUSG00000067702	22144	MGI:1095406	Tuba3a	tubulin, alpha 3A
ENSOCUG00000001971	ENSMUSG00000067336	12168	MGI:1095407	Bmpr2	bone morphogenetic protein receptor, type II (serine/threonine kinase)
ENSOCUG00000028032	ENSMUSG00000043091	22146	MGI:1095409	Tuba1c	tubulin, alpha 1C
ENSOCUG00000026994	ENSMUSG00000026202	22145	MGI:1095410	Tuba4a	tubulin, alpha 4A
ENSOCUG00000001005	ENSMUSG00000001855	227720	MGI:1095411	Nup214	nucleoporin 214
ENSOCUG00000015054	ENSMUSG00000059921	22253	MGI:1095412	Unc5c	unc-5 netrin receptor C
ENSOCUG00000001894	ENSMUSG00000029570	16848	MGI:1095413	Lfng	LFNG O-fucosylpeptide 3-beta-N-acetylglucosaminyltransferase
ENSOCUG00000001029	ENSMUSG00000028217	12557	MGI:1095414	Cdh17	cadherin 17
ENSOCUG00000009592	ENSMUSG00000026141	12823	MGI:1095415	Col19a1	collagen, type XIX, alpha 1
ENSOCUG00000002884	ENSMUSG00000027276	16449	MGI:1095416	Jag1	jagged 1
ENSOCUG00000008253	ENSMUSG00000027082	21788	MGI:1095418	Tfpi	tissue factor pathway inhibitor
ENSOCUG00000014741	ENSMUSG00000037369	22289	MGI:1095419	Kdm6a	lysine (K)-specific demethylase 6A
ENSOCUG00000009292	ENSMUSG00000020059	20962	MGI:109542	Sycp3	synaptonemal complex protein 3
ENSOCUG00000004587	ENSMUSG00000027690	20526	MGI:1095438	Slc2a2	solute carrier family 2 (facilitated glucose transporter), member 2
ENSOCUG00000013366	ENSMUSG00000019866	11630	MGI:109544	Crybg1	crystallin beta-gamma domain containing 1
ENSOCUG00000002813	ENSMUSG00000058396	11536	MGI:109545	Gpr182	G protein-coupled receptor 182
ENSOCUG00000015302	ENSMUSG00000033335	13430	MGI:109547	Dnm2	dynamin 2
ENSOCUG00000016023	ENSMUSG00000054693	11487	MGI:109548	Adam10	a disintegrin and metallopeptidase domain 10
ENSOCUG00000001757	ENSMUSG00000061723	21957	MGI:109550	Tnnt3	troponin T3, skeletal, fast
ENSOCUG00000014527	ENSMUSG00000030560	13032	MGI:109553	Ctsc	cathepsin C
ENSOCUG00000010217	ENSMUSG00000028932	19181	MGI:109555	Psmc2	proteasome (prosome, macropain) 26S subunit, ATPase 2
ENSOCUG00000012065	ENSMUSG00000020151	19279	MGI:109559	Ptprr	protein tyrosine phosphatase, receptor type, R
ENSOCUG00000016930	ENSMUSG00000026222	20684	MGI:109561	Sp100	nuclear antigen Sp100
ENSOCUG00000010906	ENSMUSG00000044337	12778	MGI:109562	Ackr3	atypical chemokine receptor 3
ENSOCUG00000001923	ENSMUSG00000045382	12767	MGI:109563	Cxcr4	chemokine (C-X-C motif) receptor 4
ENSOCUG00000011273	ENSMUSG00000074657	16572	MGI:109564	Kif5a	kinesin family member 5A
ENSOCUG00000012768	ENSMUSG00000006307	75410	MGI:109565	Kmt2b	lysine (K)-specific methyltransferase 2B
ENSOCUG00000003712	ENSMUSG00000042712	22381	MGI:109567	Tceal9	transcription elongation factor A like 9
ENSOCUG00000004256	ENSMUSG00000022023	22380	MGI:109568	Wbp4	WW domain binding protein 4
ENSOCUG00000001754	ENSMUSG00000023008	22379	MGI:109569	Fmnl3	formin-like 3
ENSOCUG00000015810	ENSMUSG00000037446	22157	MGI:109571	Tulp1	tubby like protein 1
ENSOCUG00000012659	ENSMUSG00000005968	22156	MGI:109572	Tuft1	tuftelin 1
ENSOCUG00000002312	ENSMUSG00000006281	21745	MGI:109573	Tep1	telomerase associated protein 1
ENSOCUG00000025358	ENSMUSG00000022912	19128	MGI:1095733	Pros1	protein S (alpha)
ENSOCUG00000008388	ENSMUSG00000029385	12452	MGI:1095734	Ccng2	cyclin G2
ENSOCUG00000011025	ENSMUSG00000064293	269784	MGI:1095737	Cntn4	contactin 4
ENSOCUG00000007903	ENSMUSG00000024979	21684	MGI:109574	Tectb	tectorin beta
ENSOCUG00000001263	ENSMUSG00000037705	21683	MGI:109575	Tecta	tectorin alpha
ENSOCUG00000027217	ENSMUSG00000031832	21341	MGI:109576	Taf1c	TATA-box binding protein associated factor, RNA polymerase I, C
ENSOCUG00000005643	ENSMUSG00000059669	21340	MGI:109577	Taf1b	TATA-box binding protein associated factor, RNA polymerase I, B
ENSOCUG00000000606	ENSMUSG00000072258	21339	MGI:109578	Taf1a	TATA-box binding protein associated factor, RNA polymerase I, A
ENSOCUG00000016787	ENSMUSG00000067006	20724	MGI:109579	Serpinb5	serine (or cysteine) peptidase inhibitor, clade B, member 5
ENSOCUG00000004614	ENSMUSG00000068856	107701	MGI:109580	Sf3b4	splicing factor 3b, subunit 4
ENSOCUG00000002748	ENSMUSG00000042312	20196	MGI:109581	S100a13	S100 calcium binding protein A13
ENSOCUG00000023609	ENSMUSG00000039771	20022	MGI:109582	Polr2j	polymerase (RNA) II (DNA directed) polypeptide J
ENSOCUG00000008774	ENSMUSG00000013663	19211	MGI:109583	Pten	phosphatase and tensin homolog
ENSOCUG00000000425	ENSMUSG00000021413	19134	MGI:109584	Prpf4b	pre-mRNA processing factor 4B
ENSOCUG00000014089	ENSMUSG00000027695	18805	MGI:109585	Pld1	phospholipase D1
ENSOCUG00000011150	ENSMUSG00000063727	18383	MGI:109587	Tnfrsf11b	tumor necrosis factor receptor superfamily, member 11b (osteoprotegerin)
ENSOCUG00000016167	ENSMUSG00000001173	320634	MGI:109589	Ocrl	OCRL, inositol polyphosphate-5-phosphatase
ENSOCUG00000000548	ENSMUSG00000023572	17151	MGI:109595	Ccndbp1	cyclin D-type binding-protein 1
ENSOCUG00000010708	ENSMUSG00000079553	100502766	MGI:109596	Kifc1	kinesin family member C1
ENSOCUG00000016595	ENSMUSG00000031910	15118	MGI:109599	Has3	hyaluronan synthase 3
ENSOCUG00000007723	ENSMUSG00000032475	17973	MGI:109601	Nck1	non-catalytic region of tyrosine kinase adaptor protein 1
ENSOCUG00000000898	ENSMUSG00000047454	268566	MGI:109602	Gphn	gephyrin
ENSOCUG00000012259	ENSMUSG00000042190	14747	MGI:109603	Cmklr1	chemokine-like receptor 1
ENSOCUG00000012460	ENSMUSG00000028680	12795	MGI:109604	Plk3	polo like kinase 3
ENSOCUG00000012175	ENSMUSG00000026425	14270	MGI:109605	Srgap2	SLIT-ROBO Rho GTPase activating protein 2
ENSOCUG00000005859	ENSMUSG00000075415	14269	MGI:109606	Fnbp1	formin binding protein 1
ENSOCUG00000005115	ENSMUSG00000000392	14089	MGI:109608	Fap	fibroblast activation protein
ENSOCUG00000003441	ENSMUSG00000034171	14073	MGI:109609	Faah	fatty acid amide hydrolase
ENSOCUG00000009228	ENSMUSG00000041773	13803	MGI:109610	Enc1	ectodermal-neural cortex 1
ENSOCUG00000013150	ENSMUSG00000054889	109620	MGI:109611	Dsp	desmoplakin
ENSOCUG00000005745	ENSMUSG00000049685	13108	MGI:109612	Cyp2g1	cytochrome P450, family 2, subfamily g, polypeptide 1
ENSOCUG00000017377	ENSMUSG00000022324	17181	MGI:109613	Matn2	matrilin 2
ENSOCUG00000022977	ENSMUSG00000089661	12587	MGI:109615	Mia	melanoma inhibitory activity
ENSOCUG00000021468	ENSMUSG00000032033	12023	MGI:109617	Barx2	BarH-like homeobox 2
ENSOCUG00000001013	ENSMUSG00000006273	11966	MGI:109618	Atp6v1b2	ATPase, H+ transporting, lysosomal V1 subunit B2
ENSOCUG00000007063	ENSMUSG00000027967	11924	MGI:109619	Neurog2	neurogenin 2
ENSOCUG00000000885	ENSMUSG00000009995	66826	MGI:109626	Taz	tafazzin
ENSOCUG00000015910	ENSMUSG00000019088	69537	MGI:109628	Dnase1l1	deoxyribonuclease 1-like 1
ENSOCUG00000017631	ENSMUSG00000019087	54411	MGI:109629	Atp6ap1	ATPase, H+ transporting, lysosomal accessory protein 1
ENSOCUG00000010455	ENSMUSG00000024518	19434	MGI:109632	Rax	retina and anterior neural fold homeobox
ENSOCUG00000023791	ENSMUSG00000044052	12777	MGI:1096320	Ccr10	chemokine (C-C motif) receptor 10
ENSOCUG00000023437	ENSMUSG00000024182	12005	MGI:1096327	Axin1	axin 1
ENSOCUG00000000836	ENSMUSG00000047861	14233	MGI:1096329	Foxi1	forkhead box I1
ENSOCUG00000006996	ENSMUSG00000024959	12015	MGI:1096330	Bad	BCL2-associated agonist of cell death
ENSOCUG00000013354	ENSMUSG00000005357	20513	MGI:1096331	Slc1a6	solute carrier family 1 (high affinity aspartate/glutamate transporter), member 6
ENSOCUG00000010474	ENSMUSG00000052593	11491	MGI:1096335	Adam17	a disintegrin and metallopeptidase domain 17
ENSOCUG00000003812	ENSMUSG00000032537	270190	MGI:1096337	Ephb1	Eph receptor B1
ENSOCUG00000007545	ENSMUSG00000029869	13848	MGI:1096338	Ephb6	Eph receptor B6
ENSOCUG00000002793	ENSMUSG00000025925	21749	MGI:109634	Terf1	telomeric repeat binding factor 1
ENSOCUG00000014356	ENSMUSG00000016477	13557	MGI:1096340	E2f3	E2F transcription factor 3
ENSOCUG00000023896	ENSMUSG00000018983	242705	MGI:1096341	E2f2	E2F transcription factor 2
ENSOCUG00000013323	ENSMUSG00000007815	11848	MGI:1096342	Rhoa	ras homolog family member A
ENSOCUG00000003641	ENSMUSG00000096225	16875	MGI:1096343	Lhx8	LIM homeobox protein 8
ENSOCUG00000002805	ENSMUSG00000005686	11717	MGI:1096344	Ampd3	adenosine monophosphate deaminase 3
ENSOCUG00000013748	ENSMUSG00000059434	231103	MGI:1096345	Gckr	glucokinase regulatory protein
ENSOCUG00000011670	ENSMUSG00000034684	20350	MGI:1096347	Sema3f	sema domain, immunoglobulin domain (Ig), short basic domain, secreted, (semaphorin) 3F
ENSOCUG00000011455	ENSMUSG00000035916	237523	MGI:1096349	Ptprq	protein tyrosine phosphatase, receptor type, Q
ENSOCUG00000012620	ENSMUSG00000031583	22427	MGI:109635	Wrn	Werner syndrome RecQ like helicase
ENSOCUG00000016098	ENSMUSG00000048373	14181	MGI:1096350	Fgfbp1	fibroblast growth factor binding protein 1
ENSOCUG00000008662	ENSMUSG00000029162	16548	MGI:1096353	Khk	ketohexokinase
ENSOCUG00000015574	ENSMUSG00000045092	13609	MGI:1096355	S1pr1	sphingosine-1-phosphate receptor 1
ENSOCUG00000000178	ENSMUSG00000024987	13082	MGI:1096359	Cyp26a1	cytochrome P450, family 26, subfamily a, polypeptide 1
ENSOCUG00000002950	ENSMUSG00000020737	15374	MGI:1096361	Jpt1	Jupiter microtubule associated homolog 1
ENSOCUG00000016530	ENSMUSG00000047953	14729	MGI:1096363	Gp5	glycoprotein 5 (platelet)
ENSOCUG00000015986	ENSMUSG00000078652	19192	MGI:1096366	Psme3	proteaseome (prosome, macropain) activator subunit 3 (PA28 gamma, Ki)
ENSOCUG00000002846	ENSMUSG00000022216	19186	MGI:1096367	Psme1	proteasome (prosome, macropain) activator subunit 1 (PA28 alpha)
ENSOCUG00000009490	ENSMUSG00000009090	11764	MGI:1096368	Ap1b1	adaptor protein complex AP-1, beta 1 subunit
ENSOCUG00000015064	ENSMUSG00000018554	53422	MGI:1096372	Ybx2	Y box protein 2
ENSOCUG00000011678	ENSMUSG00000029763	20336	MGI:1096376	Exoc4	exocyst complex component 4
ENSOCUG00000008746	ENSMUSG00000032586	22036	MGI:1096377	Traip	TRAF-interacting protein
ENSOCUG00000024393	ENSMUSG00000025439	12729	MGI:109638	Clns1a	chloride channel, nucleotide-sensitive, 1A
ENSOCUG00000006348	ENSMUSG00000031897	19171	MGI:1096380	Psmb10	proteasome (prosome, macropain) subunit, beta type 10
ENSOCUG00000005940	ENSMUSG00000055116	11865	MGI:1096381	Arntl	aryl hydrocarbon receptor nuclear translocator-like
ENSOCUG00000003870	ENSMUSG00000031073	14170	MGI:1096383	Fgf15	fibroblast growth factor 15
ENSOCUG00000026133	ENSMUSG00000004892	12032	MGI:1096385	Bcan	brevican
ENSOCUG00000016655	ENSMUSG00000031844	15486	MGI:1096386	Hsd17b2	hydroxysteroid (17-beta) dehydrogenase 2
ENSOCUG00000029369	ENSMUSG00000023443	13984	MGI:1096388	Esx1	extraembryonic, spermatogenesis, homeobox 1
ENSOCUG00000005620	ENSMUSG00000024109	18189	MGI:1096391	Nrxn1	neurexin I
ENSOCUG00000017084	ENSMUSG00000021730	15165	MGI:1096392	Hcn1	hyperpolarization-activated, cyclic nucleotide-gated K+ 1
ENSOCUG00000012254	ENSMUSG00000022676	20583	MGI:1096393	Snai2	snail family zinc finger 2
ENSOCUG00000010138	ENSMUSG00000049553	20019	MGI:1096397	Polr1a	polymerase (RNA) I polypeptide A
ENSOCUG00000023350	ENSMUSG00000037706	12520	MGI:1096398	Cd81	CD81 antigen
ENSOCUG00000021796	ENSMUSG00000038366	16796	MGI:109656	Lasp1	LIM and SH3 protein 1
ENSOCUG00000006900	ENSMUSG00000025423	17344	MGI:1096566	Pias2	protein inhibitor of activated STAT 2
ENSOCUG00000017592	ENSMUSG00000040813	21767	MGI:1096570	Tex264	testis expressed gene 264
ENSOCUG00000017232	ENSMUSG00000044477	21769	MGI:1096572	Zfand3	zinc finger, AN1-type domain 3
ENSOCUG00000005734	ENSMUSG00000041438	21771	MGI:1096573	Utp4	UTP4 small subunit processome component
ENSOCUG00000009399	ENSMUSG00000000805	12351	MGI:1096574	Car4	carbonic anhydrase 4
ENSOCUG00000008898	ENSMUSG00000014748	21766	MGI:1096575	Tex261	testis expressed gene 261
ENSOCUG00000007058	ENSMUSG00000006998	21762	MGI:1096584	Psmd2	proteasome (prosome, macropain) 26S subunit, non-ATPase, 2
ENSOCUG00000004635	ENSMUSG00000023013	11827	MGI:1096865	Aqp2	aquaporin 2
ENSOCUG00000005233	ENSMUSG00000013089	104156	MGI:1096867	Etv5	ets variant 5
ENSOCUG00000011838	ENSMUSG00000029371	20311	MGI:1096868	Cxcl5	chemokine (C-X-C motif) ligand 5
ENSOCUG00000009374	ENSMUSG00000021356	16364	MGI:1096873	Irf4	interferon regulatory factor 4
ENSOCUG00000017155	ENSMUSG00000043940	72145	MGI:1096875	Wdfy3	WD repeat and FYVE domain containing 3
ENSOCUG00000007246	ENSMUSG00000003436	13389	MGI:1096877	Dll3	delta like canonical Notch ligand 3
ENSOCUG00000021273	ENSMUSG00000044748	13214	MGI:1096878	Defb1	defensin beta 1
ENSOCUG00000015076	ENSMUSG00000059363	14297	MGI:1096879	Fxn	frataxin
ENSOCUG00000022950	ENSMUSG00000020205	21664	MGI:1096880	Phlda1	pleckstrin homology like domain, family A, member 1
ENSOCUG00000008481	ENSMUSG00000037742	13627	MGI:1096881	Eef1a1	eukaryotic translation elongation factor 1 alpha 1
ENSOCUG00000000787	ENSMUSG00000030223	19277	MGI:1097152	Ptpro	protein tyrosine phosphatase, receptor type, O
ENSOCUG00000007482	ENSMUSG00000031778	20312	MGI:1097153	Cx3cl1	chemokine (C-X3-C motif) ligand 1
ENSOCUG00000000094	ENSMUSG00000017969	19223	MGI:1097156	Ptgis	prostaglandin I2 (prostacyclin) synthase
ENSOCUG00000010801	ENSMUSG00000062168	237178	MGI:1097157	Ppef1	protein phosphatase with EF hand calcium-binding domain 1
ENSOCUG00000008167	ENSMUSG00000029767	12321	MGI:1097158	Calu	calumenin
ENSOCUG00000002157	ENSMUSG00000032340	18007	MGI:1097159	Neo1	neogenin
ENSOCUG00000003082	ENSMUSG00000027071	228139	MGI:1097160	P2rx3	purinergic receptor P2X, ligand-gated ion channel, 3
ENSOCUG00000002556	ENSMUSG00000057789	12018	MGI:1097161	Bak1	BCL2-antagonist/killer 1
ENSOCUG00000014942	ENSMUSG00000020471	18972	MGI:1097163	Pold2	polymerase (DNA directed), delta 2, regulatory subunit
ENSOCUG00000000136	ENSMUSG00000025105	12173	MGI:1097164	Bnc1	basonuclin 1
ENSOCUG00000015023	ENSMUSG00000041014	18183	MGI:1097165	Nrg3	neuregulin 3
ENSOCUG00000005309	ENSMUSG00000041359	21432	MGI:1097166	Tcl1	T cell lymphoma breakpoint 1
ENSOCUG00000017259	ENSMUSG00000071650	14376	MGI:1097667	Ganab	alpha glucosidase 2 alpha neutral subunit
ENSOCUG00000014902	ENSMUSG00000020407	22271	MGI:1097668	Upp1	uridine phosphorylase 1
ENSOCUG00000007438	ENSMUSG00000040552	12267	MGI:1097680	C3ar1	complement component 3a receptor 1
ENSOCUG00000024505	ENSMUSG00000012848	20103	MGI:1097682	Rps5	ribosomal protein S5
ENSOCUG00000024644	ENSMUSG00000060743	15078	MGI:1097686	H3f3a	H3 histone, family 3A
ENSOCUG00000024046	ENSMUSG00000037872	13349	MGI:1097689	Ackr1	atypical chemokine receptor 1 (Duffy blood group)
ENSOCUG00000000598	ENSMUSG00000019777	15182	MGI:1097691	Hdac2	histone deacetylase 2
ENSOCUG00000011466	ENSMUSG00000031394	14539	MGI:1097692	Opn1mw	opsin 1 (cone pigments), medium-wave-sensitive (color blindness, deutan)
ENSOCUG00000015977	ENSMUSG00000030271	18294	MGI:1097693	Ogg1	8-oxoguanine DNA-glycosylase 1
ENSOCUG00000006045	ENSMUSG00000006920	14055	MGI:1097695	Ezh1	enhancer of zeste 1 polycomb repressive complex 2 subunit
ENSOCUG00000003187	ENSMUSG00000000359	19700	MGI:1097696	Rem1	rad and gem related GTP binding protein 1
ENSOCUG00000005003	ENSMUSG00000022875	16644	MGI:1097705	Kng1	kininogen 1
ENSOCUG00000005711	ENSMUSG00000021537	12626	MGI:1097706	Cetn3	centrin 3
ENSOCUG00000023942	ENSMUSG00000038633	13244	MGI:1097711	Degs1	delta(4)-desaturase, sphingolipid 1
ENSOCUG00000009850	ENSMUSG00000024413	18145	MGI:1097712	Npc1	NPC intracellular cholesterol transporter 1
ENSOCUG00000015177	ENSMUSG00000030103	20893	MGI:1097714	Bhlhe40	basic helix-loop-helix family, member e40
ENSOCUG00000022180	ENSMUSG00000035277	11878	MGI:1097716	Arx	aristaless related homeobox
ENSOCUG00000006901	ENSMUSG00000024803	107765	MGI:1097717	Ankrd1	ankyrin repeat domain 1 (cardiac muscle)
ENSOCUG00000011054	ENSMUSG00000039936	18707	MGI:1098211	Pik3cd	phosphatidylinositol-4,5-bisphosphate 3-kinase catalytic subunit delta
ENSOCUG00000005986	ENSMUSG00000015217	15354	MGI:1098219	Hmgb3	high mobility group box 3
ENSOCUG00000015175	ENSMUSG00000033061	19711	MGI:1098222	Resp18	regulated endocrine-specific protein 18
ENSOCUG00000001961	ENSMUSG00000030346	19362	MGI:1098224	Rad51ap1	RAD51 associated protein 1
ENSOCUG00000016491	ENSMUSG00000041498	381293	MGI:1098226	Kif14	kinesin family member 14
ENSOCUG00000010340	ENSMUSG00000020891	11688	MGI:1098228	Alox8	arachidonate 8-lipoxygenase
ENSOCUG00000001822	ENSMUSG00000028758	16559	MGI:1098229	Kif17	kinesin family member 17
ENSOCUG00000000699	ENSMUSG00000045328	229841	MGI:1098230	Cenpe	centromere protein E
ENSOCUG00000002800	ENSMUSG00000028357	16552	MGI:1098232	Kif12	kinesin family member 12
ENSOCUG00000013901	ENSMUSG00000024423	16210	MGI:1098233	Impact	impact, RWD domain protein
ENSOCUG00000009508	ENSMUSG00000002844	11544	MGI:1098234	Adprh	ADP-ribosylarginine hydrolase
ENSOCUG00000021388	ENSMUSG00000020787	18436	MGI:1098235	P2rx1	purinergic receptor P2X, ligand-gated ion channel, 1
ENSOCUG00000007802	ENSMUSG00000021585	12380	MGI:1098236	Cast	calpastatin
ENSOCUG00000003123	ENSMUSG00000032489	16578	MGI:1098237	Kif9	kinesin family member 9
ENSOCUG00000006645	ENSMUSG00000023999	319991	MGI:1098238	Kif6	kinesin family member 6
ENSOCUG00000013706	ENSMUSG00000038844	16558	MGI:1098240	Kif16b	kinesin family member 16B
ENSOCUG00000003144	ENSMUSG00000038871	12183	MGI:1098242	Bpgm	2,3-bisphosphoglycerate mutase
ENSOCUG00000024398	ENSMUSG00000022971	15976	MGI:1098243	Ifnar2	interferon (alpha and beta) receptor 2
ENSOCUG00000010799	ENSMUSG00000004849	11769	MGI:1098244	Ap1s1	adaptor protein complex AP-1, sigma 1
ENSOCUG00000024471	ENSMUSG00000060275	100042150	MGI:1098246	Nrg2	neuregulin 2
ENSOCUG00000015257	ENSMUSG00000005779	19172	MGI:1098257	Psmb4	proteasome (prosome, macropain) subunit, beta type 4
ENSOCUG00000000930	ENSMUSG00000036768	209737	MGI:1098258	Kif15	kinesin family member 15
ENSOCUG00000002341	ENSMUSG00000056737	12332	MGI:1098259	Capg	capping protein (actin filament), gelsolin-like
ENSOCUG00000025068	ENSMUSG00000020821	16562	MGI:1098260	Kif1c	kinesin family member 1C
ENSOCUG00000017955	ENSMUSG00000021375	16553	MGI:1098264	Kif13a	kinesin family member 13A
ENSOCUG00000005942	ENSMUSG00000060012	16554	MGI:1098265	Kif13b	kinesin family member 13B
ENSOCUG00000004486	ENSMUSG00000030077	12661	MGI:1098266	Chl1	cell adhesion molecule L1-like
ENSOCUG00000002419	ENSMUSG00000020456	18293	MGI:1098267	Ogdh	oxoglutarate (alpha-ketoglutarate) dehydrogenase (lipoamide)
ENSOCUG00000017493	ENSMUSG00000006740	16573	MGI:1098268	Kif5b	kinesin family member 5B
ENSOCUG00000009699	ENSMUSG00000026764	16574	MGI:1098269	Kif5c	kinesin family member 5C
ENSOCUG00000027066	ENSMUSG00000026360	19735	MGI:1098271	Rgs2	regulator of G-protein signaling 2
ENSOCUG00000015922	ENSMUSG00000066800	24014	MGI:1098272	Rnasel	ribonuclease L (2', 5'-oligoisoadenylate synthetase-dependent)
ENSOCUG00000004954	ENSMUSG00000022244	17117	MGI:1098273	Amacr	alpha-methylacyl-CoA racemase
ENSOCUG00000012486	ENSMUSG00000006724	13115	MGI:1098274	Cyp27b1	cytochrome P450, family 27, subfamily b, polypeptide 1
ENSOCUG00000010577	ENSMUSG00000031822	382034	MGI:1098275	Gse1	genetic suppressor element 1, coiled-coil protein
ENSOCUG00000004458	ENSMUSG00000022521	12914	MGI:1098280	Crebbp	CREB binding protein
ENSOCUG00000012708	ENSMUSG00000022149	12279	MGI:1098282	C9	complement component 9
ENSOCUG00000026333	ENSMUSG00000020893	18626	MGI:1098283	Per1	period circadian clock 1
ENSOCUG00000025663	ENSMUSG00000024900	12894	MGI:1098296	Cpt1a	carnitine palmitoyltransferase 1a, liver
ENSOCUG00000001169	ENSMUSG00000026678	19737	MGI:1098434	Rgs5	regulator of G-protein signaling 5
ENSOCUG00000015356	ENSMUSG00000021975	210925	MGI:1098533	Ints9	integrator complex subunit 9
ENSOCUG00000026164	ENSMUSG00000030272	52163	MGI:1098535	Camk1	calcium/calmodulin-dependent protein kinase I
ENSOCUG00000016057	ENSMUSG00000001056	52530	MGI:1098547	Nhp2	NHP2 ribonucleoprotein
ENSOCUG00000016278	ENSMUSG00000053334	231630	MGI:1098550	Ficd	FIC domain containing
ENSOCUG00000003228	ENSMUSG00000020385	12750	MGI:1098551	Clk4	CDC like kinase 4
ENSOCUG00000022291	ENSMUSG00000090523	71683	MGI:1098566	Gypc	glycophorin C
ENSOCUG00000015550	ENSMUSG00000026587	11899	MGI:1098567	Astn1	astrotactin 1
ENSOCUG00000007371	ENSMUSG00000028857	52174	MGI:1098568	Tmem222	transmembrane protein 222
ENSOCUG00000007094	ENSMUSG00000004561	52535	MGI:1098577	Mettl17	methyltransferase like 17
ENSOCUG00000009879	ENSMUSG00000025862	20843	MGI:1098583	Stag2	stromal antigen 2
ENSOCUG00000011240	ENSMUSG00000038071	18169	MGI:1098590	Npy6r	neuropeptide Y receptor Y6
ENSOCUG00000026514	ENSMUSG00000033809	208624	MGI:1098592	Alg3	asparagine-linked glycosylation 3 (alpha-1,3-mannosyltransferase)
ENSOCUG00000009802	ENSMUSG00000029469	12589	MGI:1098597	Ift81	intraflagellar transport 81
ENSOCUG00000001834	ENSMUSG00000028256	52184	MGI:1098600	Odf2l	outer dense fiber of sperm tails 2-like
ENSOCUG00000005294	ENSMUSG00000028278	52187	MGI:1098604	Rragd	Ras-related GTP binding D
ENSOCUG00000015214	ENSMUSG00000019303	19183	MGI:1098610	Psmc3ip	proteasome (prosome, macropain) 26S subunit, ATPase 3, interacting protein
ENSOCUG00000009525	ENSMUSG00000042099	80880	MGI:1098615	Kank3	KN motif and ankyrin repeat domains 3
ENSOCUG00000017435	ENSMUSG00000036202	51869	MGI:1098622	Rif1	replication timing regulatory factor 1
ENSOCUG00000016540	ENSMUSG00000036880	52538	MGI:1098623	Acaa2	acetyl-Coenzyme A acyltransferase 2 (mitochondrial 3-oxoacyl-Coenzyme A thiolase)
ENSOCUG00000001296	ENSMUSG00000028940	15206	MGI:1098624	Hes2	hes family bHLH transcription factor 2
ENSOCUG00000002394	ENSMUSG00000028868	242687	MGI:1098641	Wasf2	WAS protein family, member 2
ENSOCUG00000014871	ENSMUSG00000041733	52064	MGI:1098643	Coq5	coenzyme Q5 methyltransferase
ENSOCUG00000022432	ENSMUSG00000070056	52065	MGI:1098644	Mfhas1	malignant fibrous histiocytoma amplified sequence 1
ENSOCUG00000009173	ENSMUSG00000033931	52202	MGI:1098653	Rbm34	RNA binding motif protein 34
ENSOCUG00000012746	ENSMUSG00000037286	20842	MGI:1098658	Stag1	stromal antigen 1
ENSOCUG00000000736	ENSMUSG00000020926	11488	MGI:1098667	Adam11	a disintegrin and metallopeptidase domain 11
ENSOCUG00000000359	ENSMUSG00000068917	12748	MGI:1098669	Clk2	CDC-like kinase 2
ENSOCUG00000017733	ENSMUSG00000032316	102414	MGI:1098670	Clk3	CDC-like kinase 3
ENSOCUG00000028077	ENSMUSG00000040842	213491	MGI:1098672	Szrd1	SUZ RNA binding domain containing 1
ENSOCUG00000016004	ENSMUSG00000029176	52206	MGI:1098673	Anapc4	anaphase promoting complex subunit 4
ENSOCUG00000016095	ENSMUSG00000027810	229317	MGI:1098684	Eif2a	eukaryotic translation initiation factor 2A
ENSOCUG00000009550	ENSMUSG00000057230	269774	MGI:1098687	Aak1	AP2 associated kinase 1
ENSOCUG00000009461	ENSMUSG00000037681	272636	MGI:1098699	Esyt3	extended synaptotagmin-like protein 3
ENSOCUG00000003231	ENSMUSG00000029192	100855	MGI:1098708	Tbc1d14	TBC1 domain family, member 14
ENSOCUG00000014454	ENSMUSG00000021725	52552	MGI:1098713	Parp8	poly (ADP-ribose) polymerase family, member 8
ENSOCUG00000022309	ENSMUSG00000022505	13731	MGI:1098726	Emp2	epithelial membrane protein 2
ENSOCUG00000017332	ENSMUSG00000049299	245828	MGI:1098727	Trappc1	trafficking protein particle complex 1
ENSOCUG00000002134	ENSMUSG00000040212	13732	MGI:1098729	Emp3	epithelial membrane protein 3
ENSOCUG00000007798	ENSMUSG00000020829	52466	MGI:1098733	Slc46a1	solute carrier family 46, member 1
ENSOCUG00000015131	ENSMUSG00000026199	52231	MGI:1098746	Ankzf1	ankyrin repeat and zinc finger domain containing 1
ENSOCUG00000012533	ENSMUSG00000078429	52468	MGI:1098748	Ctdsp2	CTD (carboxy-terminal domain, RNA polymerase II, polypeptide A) small phosphatase 2
ENSOCUG00000008043	ENSMUSG00000040640	238988	MGI:1098749	Erc2	ELKS/RAB6-interacting/CAST family member 2
ENSOCUG00000026980	ENSMUSG00000002102	19182	MGI:1098754	Psmc3	proteasome (prosome, macropain) 26S subunit, ATPase 3
ENSOCUG00000015948	ENSMUSG00000017188	52469	MGI:1098757	Coa3	cytochrome C oxidase assembly factor 3
ENSOCUG00000011023	ENSMUSG00000049134	18175	MGI:1098765	Nrap	nebulin-related anchoring protein
ENSOCUG00000000547	ENSMUSG00000026039	68549	MGI:1098767	Sgo2a	shugoshin 2A
ENSOCUG00000013609	ENSMUSG00000016024	16803	MGI:1098776	Lbp	lipopolysaccharide binding protein
ENSOCUG00000010690	ENSMUSG00000038174	213056	MGI:1098784	Fam126b	family with sequence similarity 126, member B
ENSOCUG00000008262	ENSMUSG00000029173	211006	MGI:1098791	Sepsecs	Sep (O-phosphoserine) tRNA:Sec (selenocysteine) tRNA synthase
ENSOCUG00000014569	ENSMUSG00000036990	73945	MGI:1098801	Otud4	OTU domain containing 4
ENSOCUG00000000780	ENSMUSG00000003119	69131	MGI:1098802	Cdk12	cyclin-dependent kinase 12
ENSOCUG00000007365	ENSMUSG00000043673	238076	MGI:1098804	Kcns3	potassium voltage-gated channel, delayed-rectifier, subfamily S, member 3
ENSOCUG00000002638	ENSMUSG00000036513	52245	MGI:1098806	Commd2	COMM domain containing 2
ENSOCUG00000005856	ENSMUSG00000005069	19305	MGI:1098808	Pex5	peroxisomal biogenesis factor 5
ENSOCUG00000008382	ENSMUSG00000024370	52563	MGI:1098815	Cdc23	CDC23 cell division cycle 23
ENSOCUG00000012298	ENSMUSG00000026790	18286	MGI:1098824	Odf2	outer dense fiber of sperm tails 2
ENSOCUG00000016196	ENSMUSG00000026798	227683	MGI:1098826	Coq4	coenzyme Q4
ENSOCUG00000010196	ENSMUSG00000052852	52250	MGI:1098827	Reep1	receptor accessory protein 1
ENSOCUG00000005215	ENSMUSG00000041984	20129	MGI:1099055	Rptn	repetin
ENSOCUG00000008078	ENSMUSG00000021468	268656	MGI:1099431	Sptlc1	serine palmitoyltransferase, long chain base subunit 1
ENSOCUG00000000597	ENSMUSG00000059060	19363	MGI:1099436	Rad51b	RAD51 paralog B
ENSOCUG00000007899	ENSMUSG00000031349	18194	MGI:1099438	Nsdhl	NAD(P) dependent steroid dehydrogenase-like
ENSOCUG00000005098	ENSMUSG00000020272	20868	MGI:1099439	Stk10	serine/threonine kinase 10
ENSOCUG00000003807	ENSMUSG00000039231	20937	MGI:1099440	Suv39h1	suppressor of variegation 3-9 1
ENSOCUG00000005701	ENSMUSG00000021189	110616	MGI:1099442	Atxn3	ataxin 3
ENSOCUG00000029211	ENSMUSG00000036721	22758	MGI:1099444	Zscan12	zinc finger and SCAN domain containing 12
ENSOCUG00000009270	ENSMUSG00000043079	104027	MGI:1099446	Synpo	synaptopodin
ENSOCUG00000012457	ENSMUSG00000034243	224139	MGI:1099447	Golgb1	golgi autoantigen, golgin subfamily b, macrogolgin 1
ENSOCUG00000025780	ENSMUSG00000023235	20300	MGI:1099448	Ccl25	chemokine (C-C motif) ligand 25
ENSOCUG00000016688	ENSMUSG00000031337	17772	MGI:1099452	Mtm1	X-linked myotubular myopathy gene 1
ENSOCUG00000002271	ENSMUSG00000031167	19652	MGI:1099460	Rbm3	RNA binding motif (RNP1, RRM) protein 3
ENSOCUG00000016365	ENSMUSG00000046280	214547	MGI:1099462	She	src homology 2 domain-containing transforming protein E
ENSOCUG00000016554	ENSMUSG00000002010	15929	MGI:1099463	Idh3g	isocitrate dehydrogenase 3 (NAD+), gamma
ENSOCUG00000027360	ENSMUSG00000002014	20832	MGI:1099464	Ssr4	signal sequence receptor, delta
ENSOCUG00000003026	ENSMUSG00000029169	13204	MGI:1099786	Dhx15	DEAH (Asp-Glu-Ala-His) box polypeptide 15
ENSOCUG00000007089	ENSMUSG00000021701	20620	MGI:1099790	Plk2	polo like kinase 2
ENSOCUG00000008364	ENSMUSG00000026384	19258	MGI:1099792	Ptpn4	protein tyrosine phosphatase, non-receptor type 4
ENSOCUG00000005735	ENSMUSG00000025225	18034	MGI:1099800	Nfkb2	nuclear factor of kappa light polypeptide gene enhancer in B cells 2, p49/p100
ENSOCUG00000002760	ENSMUSG00000039959	215114	MGI:1099804	Hip1	huntingtin interacting protein 1
ENSOCUG00000008499	ENSMUSG00000021732	14165	MGI:1099809	Fgf10	fibroblast growth factor 10
ENSOCUG00000002396	ENSMUSG00000034462	18764	MGI:1099818	Pkd2	polycystic kidney disease 2
ENSOCUG00000010203	ENSMUSG00000028465	21894	MGI:1099832	Tln1	talin 1
ENSOCUG00000007019	ENSMUSG00000040356	108077	MGI:1099835	Skiv2l	superkiller viralicidic activity 2-like (S. cerevisiae)
ENSOCUG00000011051	ENSMUSG00000022015	21943	MGI:1100089	Tnfsf11	tumor necrosis factor (ligand) superfamily, member 11
ENSOCUG00000007978	ENSMUSG00000025969	18187	MGI:1100492	Nrp2	neuropilin 2
ENSOCUG00000000741	ENSMUSG00000054051	319955	MGI:1100494	Ercc6	excision repair cross-complementing rodent repair deficiency, complementation group 6
ENSOCUG00000024691	ENSMUSG00000000563	11950	MGI:1100495	Atp5f1	ATP synthase, H+ transporting, mitochondrial F0 complex, subunit B1
ENSOCUG00000003610	ENSMUSG00000026691	14262	MGI:1100496	Fmo3	flavin containing monooxygenase 3
ENSOCUG00000024851	ENSMUSG00000020848	13447	MGI:1100497	Doc2b	double C2, beta
ENSOCUG00000016065	ENSMUSG00000025229	18742	MGI:1100498	Pitx3	paired-like homeodomain transcription factor 3
ENSOCUG00000007150	ENSMUSG00000009907	20479	MGI:1100499	Vps4b	vacuolar protein sorting 4B
ENSOCUG00000017308	ENSMUSG00000059714	14251	MGI:1100500	Flot1	flotillin 1
ENSOCUG00000022548	ENSMUSG00000031130	12209	MGI:1100501	Brs3	bombesin-like receptor 3
ENSOCUG00000008019	ENSMUSG00000030247	16523	MGI:1100508	Kcnj8	potassium inwardly-rectifying channel, subfamily J, member 8
ENSOCUG00000025172	ENSMUSG00000049265	16527	MGI:1100509	Kcnk3	potassium channel, subfamily K, member 3
ENSOCUG00000014003	ENSMUSG00000027379	12235	MGI:1100510	Bub1	BUB1, mitotic checkpoint serine/threonine kinase
ENSOCUG00000016764	ENSMUSG00000061911	17933	MGI:1100511	Myt1l	myelin transcription factor 1-like
ENSOCUG00000014899	ENSMUSG00000031928	17535	MGI:1100512	Mre11a	MRE11A homolog A, double strand break repair nuclease
ENSOCUG00000002176	ENSMUSG00000020994	18949	MGI:1100514	Pnn	pinin
ENSOCUG00000007398	ENSMUSG00000029265	13486	MGI:1100515	Dr1	down-regulator of transcription 1
ENSOCUG00000017356	ENSMUSG00000001829	20480	MGI:1100517	Clpb	ClpB caseinolytic peptidase B
ENSOCUG00000024309	ENSMUSG00000025880	17131	MGI:1100518	Smad7	SMAD family member 7
ENSOCUG00000004113	ENSMUSG00000022451	19230	MGI:1100520	Twf1	twinfilin actin binding protein 1
ENSOCUG00000010551	ENSMUSG00000031297	11989	MGI:1100521	Slc7a3	solute carrier family 7 (cationic amino acid transporter, y+ system), member 3
ENSOCUG00000001944	ENSMUSG00000019865	18101	MGI:1100525	Nmbr	neuromedin B receptor
ENSOCUG00000005853	ENSMUSG00000019803	21907	MGI:1100526	Nr2e1	nuclear receptor subfamily 2, group E, member 1
ENSOCUG00000024866	ENSMUSG00000010505	17932	MGI:1100535	Myt1	myelin transcription factor 1
ENSOCUG00000014827	ENSMUSG00000025532	12909	MGI:1100818	Crcp	calcitonin gene-related peptide-receptor component protein
ENSOCUG00000002105	ENSMUSG00000029313	17355	MGI:1100819	Aff1	AF4/FMR2 family, member 1
ENSOCUG00000017669	ENSMUSG00000003731	16650	MGI:1100836	Kpna6	karyopherin (importin) alpha 6
ENSOCUG00000003633	ENSMUSG00000025089	14585	MGI:1100842	Gfra1	glial cell line derived neurotrophic factor family receptor alpha 1
ENSOCUG00000003786	ENSMUSG00000058354	16687	MGI:1100845	Krt6a	keratin 6A
ENSOCUG00000024849	ENSMUSG00000018160	19014	MGI:1100846	Med1	mediator complex subunit 1
ENSOCUG00000001818	ENSMUSG00000027782	16649	MGI:1100848	Kpna4	karyopherin (importin) alpha 4
ENSOCUG00000005540	ENSMUSG00000067276	12338	MGI:1100850	Capn6	calpain 6
ENSOCUG00000015871	ENSMUSG00000040028	15568	MGI:1100851	Elavl1	ELAV (embryonic lethal, abnormal vision)-like 1 (Hu antigen R)
ENSOCUG00000005929	ENSMUSG00000032470	17532	MGI:1100856	Mras	muscle and microspikes RAS
ENSOCUG00000025830	ENSMUSG00000035547	12337	MGI:1100859	Capn5	calpain 5
ENSOCUG00000017192	ENSMUSG00000020170	327826	MGI:1100860	Frs2	fibroblast growth factor receptor substrate 2
ENSOCUG00000006781	ENSMUSG00000021929	16648	MGI:1100863	Kpna3	karyopherin (importin) alpha 3
ENSOCUG00000013961	ENSMUSG00000018581	13411	MGI:1100864	Dnah11	dynein, axonemal, heavy chain 11
ENSOCUG00000004731	ENSMUSG00000094936	19653	MGI:1100865	Rbm4	RNA binding motif protein 4
ENSOCUG00000013626	ENSMUSG00000020704	11418	MGI:1100867	Asic2	acid-sensing (proton-gated) ion channel 2
ENSOCUG00000007618	ENSMUSG00000000384	21379	MGI:1100868	Tbrg4	transforming growth factor beta regulated gene 4
ENSOCUG00000006449	ENSMUSG00000062444	11775	MGI:1100869	Ap3b2	adaptor-related protein complex 3, beta 2 subunit
ENSOCUG00000014369	ENSMUSG00000021360	14538	MGI:1100870	Gcnt2	glucosaminyl (N-acetyl) transferase 2, I-branching enzyme
ENSOCUG00000009505	ENSMUSG00000019817	22634	MGI:1100874	Plagl1	pleiomorphic adenoma gene-like 1
ENSOCUG00000003027	ENSMUSG00000011114	21376	MGI:1100877	Tbrg1	transforming growth factor beta regulated gene 1
ENSOCUG00000021596	ENSMUSG00000041571	20364	MGI:1100878	Selenow	selenoprotein W
ENSOCUG00000013625	ENSMUSG00000027978	19142	MGI:1100881	Prss12	protease, serine 12 neurotrypsin (motopsin)
ENSOCUG00000001021	ENSMUSG00000012520	18935	MGI:1100882	Phox2b	paired-like homeobox 2b
ENSOCUG00000029062	ENSMUSG00000030878	12585	MGI:1100885	Cdr2	cerebellar degeneration-related 2
ENSOCUG00000016642	ENSMUSG00000029086	19126	MGI:1100886	Prom1	prominin 1
ENSOCUG00000005891	ENSMUSG00000008489	15569	MGI:1100887	Elavl2	ELAV like RNA binding protein 1
ENSOCUG00000002364	ENSMUSG00000028965	21942	MGI:1101059	Tnfrsf9	tumor necrosis factor receptor superfamily, member 9
ENSOCUG00000025120	ENSMUSG00000100241	20508	MGI:1101061	Slc18a3	solute carrier family 18 (vesicular monoamine), member 3
ENSOCUG00000016141	ENSMUSG00000037465	21847	MGI:1101353	Klf10	Kruppel-like factor 10
ENSOCUG00000027892	ENSMUSG00000024940	16998	MGI:1101355	Ltbp3	latent transforming growth factor beta binding protein 3
ENSOCUG00000011960	ENSMUSG00000057530	230857	MGI:1101357	Ece1	endothelin converting enzyme 1
ENSOCUG00000015748	ENSMUSG00000001441	19155	MGI:1101358	Npepps	aminopeptidase puromycin sensitive
ENSOCUG00000004892	ENSMUSG00000026484	19821	MGI:1101759	Rnf2	ring finger protein 2
ENSOCUG00000017857	ENSMUSG00000003452	12121	MGI:1101760	Bicd1	BICD cargo adaptor 1
ENSOCUG00000007244	ENSMUSG00000034403	18744	MGI:1101765	Pja1	praja ring finger ubiquitin ligase 1
ENSOCUG00000011798	ENSMUSG00000058488	16591	MGI:1101771	Kl	klotho
ENSOCUG00000017771	ENSMUSG00000031377	12169	MGI:1101778	Bmx	BMX non-receptor tyrosine kinase
ENSOCUG00000009244	ENSMUSG00000021702	21828	MGI:1101779	Thbs4	thrombospondin 4
ENSOCUG00000007502	ENSMUSG00000003051	13710	MGI:1101781	Elf3	E74-like factor 3
ENSOCUG00000029312	ENSMUSG00000037771	22348	MGI:1194488	Slc32a1	solute carrier family 32 (GABA vesicular transporter), member 1
ENSOCUG00000004973	ENSMUSG00000024456	13367	MGI:1194490	Diaph1	diaphanous related formin 1
ENSOCUG00000010664	ENSMUSG00000004897	15191	MGI:1194494	Hdgf	hepatoma-derived growth factor
ENSOCUG00000013752	ENSMUSG00000047407	21815	MGI:1194497	Tgif1	TGFB-induced factor homeobox 1
ENSOCUG00000008041	ENSMUSG00000050107	14841	MGI:1194498	Haspin	histone H3 associated protein kinase
ENSOCUG00000012837	ENSMUSG00000030206	14840	MGI:1194499	Gsg1	germ cell associated 1
ENSOCUG00000015864	ENSMUSG00000025085	226251	MGI:1194500	Ablim1	actin-binding LIM protein 1
ENSOCUG00000014794	ENSMUSG00000020788	53313	MGI:1194503	Atp2a3	ATPase, Ca++ transporting, ubiquitous
ENSOCUG00000011928	ENSMUSG00000044708	16513	MGI:1194504	Kcnj10	potassium inwardly-rectifying channel, subfamily J, member 10
ENSOCUG00000004801	ENSMUSG00000018446	12261	MGI:1194505	C1qbp	complement component 1, q subcomponent binding protein
ENSOCUG00000017509	ENSMUSG00000027834	20713	MGI:1194506	Serpini1	serine (or cysteine) peptidase inhibitor, clade I, member 1
ENSOCUG00000021391	ENSMUSG00000028757	13200	MGI:1194508	Ddost	dolichyl-di-phosphooligosaccharide-protein glycotransferase
ENSOCUG00000013109	ENSMUSG00000022193	19173	MGI:1194513	Psmb5	proteasome (prosome, macropain) subunit, beta type 5
ENSOCUG00000007448	ENSMUSG00000027528	21884	MGI:1194881	Fabp9	fatty acid binding protein 9, testis
ENSOCUG00000008644	ENSMUSG00000047182	16369	MGI:1194882	Irs3	insulin receptor substrate 3
ENSOCUG00000026194	ENSMUSG00000041578	12951	MGI:1194883	Crx	cone-rod homeobox
ENSOCUG00000012241	ENSMUSG00000021262	14026	MGI:1194884	Evl	Ena-vasodilator stimulated phosphoprotein
ENSOCUG00000012280	ENSMUSG00000022112	103978	MGI:1194894	Gpc5	glypican 5
ENSOCUG00000011525	ENSMUSG00000039457	19041	MGI:1194898	Ppl	periplakin
ENSOCUG00000000073	ENSMUSG00000006127	19062	MGI:1194899	Inpp5k	inositol polyphosphate 5-phosphatase K
ENSOCUG00000017894	ENSMUSG00000023947	18037	MGI:1194908	Nfkbie	nuclear factor of kappa light polypeptide gene enhancer in B cells inhibitor, epsilon
ENSOCUG00000015314	ENSMUSG00000024033	22092	MGI:1194909	Rsph1	radial spoke head 1 homolog (Chlamydomonas)
ENSOCUG00000000683	ENSMUSG00000031353	245688	MGI:1194910	Rbbp7	retinoblastoma binding protein 7, chromatin remodeling factor
ENSOCUG00000026003	ENSMUSG00000057236	19646	MGI:1194912	Rbbp4	retinoblastoma binding protein 4, chromatin remodeling factor
ENSOCUG00000015699	ENSMUSG00000023017	11419	MGI:1194915	Asic1	acid-sensing (proton-gated) ion channel 1
ENSOCUG00000007124	ENSMUSG00000038379	22137	MGI:1194921	Ttk	Ttk protein kinase
ENSOCUG00000015721	ENSMUSG00000021624	17079	MGI:1194924	Cd180	CD180 antigen
ENSOCUG00000029143	ENSMUSG00000059898	13507	MGI:1194993	Dsc3	desmocollin 3
ENSOCUG00000014644	ENSMUSG00000056220	18783	MGI:1195256	Pla2g4a	phospholipase A2, group IVA (cytosolic, calcium-dependent)
ENSOCUG00000010359	ENSMUSG00000059412	11936	MGI:1195260	Fxyd2	FXYD domain-containing ion transport regulator 2
ENSOCUG00000008067	ENSMUSG00000035064	13631	MGI:1195261	Eef2k	eukaryotic elongation factor-2 kinase
ENSOCUG00000027543	ENSMUSG00000029119	17160	MGI:1195262	Man2b2	mannosidase 2, alpha B2
ENSOCUG00000004451	ENSMUSG00000019920	110829	MGI:1195263	Lims1	LIM and senescent cell antigen-like domains 1
ENSOCUG00000005464	ENSMUSG00000024131	20532	MGI:1195264	Slc3a1	solute carrier family 3, member 1
ENSOCUG00000000215	ENSMUSG00000055866	18627	MGI:1195265	Per2	period circadian clock 2
ENSOCUG00000013688	ENSMUSG00000053475	21930	MGI:1195266	Tnfaip6	tumor necrosis factor alpha induced protein 6
ENSOCUG00000006593	ENSMUSG00000030890	16202	MGI:1195267	Ilk	integrin linked kinase
ENSOCUG00000000364	ENSMUSG00000036078	18391	MGI:1195268	Sigmar1	sigma non-opioid intracellular receptor 1
ENSOCUG00000004658	ENSMUSG00000027663	22401	MGI:1195270	Zmat3	zinc finger matrin type 3
ENSOCUG00000001864	ENSMUSG00000030762	11833	MGI:1195271	Aqp8	aquaporin 8
ENSOCUG00000015594	ENSMUSG00000059327	13607	MGI:1195272	Eda	ectodysplasin-A
ENSOCUG00000003616	ENSMUSG00000019489	21948	MGI:1195273	Cd70	CD70 antigen
ENSOCUG00000011778	ENSMUSG00000089789	107605	MGI:1195275	Rdh1	retinol dehydrogenase 1 (all trans)
ENSOCUG00000010114	ENSMUSG00000090247	14533	MGI:1195276	Bloc1s1	biogenesis of lysosomal organelles complex-1, subunit 1
ENSOCUG00000004131	ENSMUSG00000049672	22666	MGI:1195345	Zbtb14	zinc finger and BTB domain containing 14
ENSOCUG00000001821	ENSMUSG00000058355	24015	MGI:1195458	Abce1	ATP-binding cassette, sub-family E (OABP), member 1
ENSOCUG00000025174	ENSMUSG00000022103	14586	MGI:1195462	Gfra2	glial cell line derived neurotrophic factor family receptor alpha 2
ENSOCUG00000012709	ENSMUSG00000022240	18163	MGI:1195966	Ctnnd2	catenin (cadherin associated protein), delta 2
ENSOCUG00000017662	ENSMUSG00000031921	21750	MGI:1195972	Terf2	telomeric repeat binding factor 2
ENSOCUG00000016071	ENSMUSG00000038754	12686	MGI:1195976	Elovl3	elongation of very long chain fatty acids (FEN1/Elo2, SUR4/Elo3, yeast)-like 3
ENSOCUG00000015768	ENSMUSG00000039989	12418	MGI:1195985	Cbx4	chromobox 4
ENSOCUG00000013506	ENSMUSG00000046603	382117	MGI:1196217	Tcaim	T cell activation inhibitor, mitochondrial
ENSOCUG00000026949	ENSMUSG00000050271	244418	MGI:1196223	Prag1	PEAK1 related kinase activating pseudokinase 1
ENSOCUG00000015595	ENSMUSG00000029635	264064	MGI:1196224	Cdk8	cyclin-dependent kinase 8
ENSOCUG00000026199	ENSMUSG00000030149	27007	MGI:1196250	Klrk1	killer cell lectin-like receptor subfamily K, member 1
ENSOCUG00000026310	ENSMUSG00000028977	69743	MGI:1196251	Casz1	castor zinc finger 1
ENSOCUG00000011630	ENSMUSG00000043065	212514	MGI:1196252	Spice1	spindle and centriole associated protein 1
ENSOCUG00000001164	ENSMUSG00000036940	99982	MGI:1196256	Kdm1a	lysine (K)-specific demethylase 1A
ENSOCUG00000015551	ENSMUSG00000024165	52009	MGI:1196260	Jpt2	Jupiter microtubule associated homolog 2
ENSOCUG00000011103	ENSMUSG00000044763	52575	MGI:1196261	Trmt10c	tRNA methyltransferase 10C
ENSOCUG00000017043	ENSMUSG00000028873	52276	MGI:1196274	Cdca8	cell division cycle associated 8
ENSOCUG00000029274	ENSMUSG00000030165	16643	MGI:1196275	Klrd1	killer cell lectin-like receptor, subfamily D, member 1
ENSOCUG00000004170	ENSMUSG00000044700	230917	MGI:1196277	Tmem201	transmembrane protein 201
ENSOCUG00000012397	ENSMUSG00000031431	14605	MGI:1196284	Tsc22d3	TSC22 domain family, member 3
ENSOCUG00000001163	ENSMUSG00000029027	13368	MGI:1196287	Dffb	DNA fragmentation factor, beta subunit
ENSOCUG00000010588	ENSMUSG00000027613	16418	MGI:1196288	Eif6	eukaryotic translation initiation factor 6
ENSOCUG00000017326	ENSMUSG00000027263	51885	MGI:1196293	Tubgcp4	tubulin, gamma complex associated protein 4
ENSOCUG00000002225	ENSMUSG00000028034	51886	MGI:1196294	Fubp1	far upstream element (FUSE) binding protein 1
ENSOCUG00000008094	ENSMUSG00000037260	52120	MGI:1196297	Hgsnat	heparan-alpha-glucosaminide N-acetyltransferase
ENSOCUG00000008585	ENSMUSG00000026634	52477	MGI:1196310	Angel2	angel homolog 2
ENSOCUG00000002942	ENSMUSG00000002332	52585	MGI:1196314	Dhrs1	dehydrogenase/reductase (SDR family) member 1
ENSOCUG00000004983	ENSMUSG00000025184	52013	MGI:1196316	R3hcc1l	R3H domain and coiled-coil containing 1 like
ENSOCUG00000015686	ENSMUSG00000037824	52588	MGI:1196325	Tspan14	tetraspanin 14
ENSOCUG00000009431	ENSMUSG00000051359	52589	MGI:1196326	Ncald	neurocalcin delta
ENSOCUG00000005254	ENSMUSG00000010047	15587	MGI:1196334	Hyal2	hyaluronoglucosaminidase 2
ENSOCUG00000006825	ENSMUSG00000012076	52592	MGI:1196337	Brms1l	breast cancer metastasis-suppressor 1-like
ENSOCUG00000009429	ENSMUSG00000031467	52123	MGI:1196345	Agpat5	1-acylglycerol-3-phosphate O-acyltransferase 5 (lysophosphatidic acid acyltransferase, epsilon)
ENSOCUG00000001343	ENSMUSG00000034312	232227	MGI:1196356	Iqsec1	IQ motif and Sec7 domain 1
ENSOCUG00000011553	ENSMUSG00000023068	52014	MGI:1196365	Nus1	NUS1 dehydrodolichyl diphosphate synthase subunit
ENSOCUG00000005839	ENSMUSG00000040612	100039795	MGI:1196370	Ildr2	immunoglobulin-like domain containing receptor 2
ENSOCUG00000016844	ENSMUSG00000019854	19707	MGI:1196373	Reps1	RalBP1 associated Eps domain containing protein
ENSOCUG00000002310	ENSMUSG00000019850	21929	MGI:1196377	Tnfaip3	tumor necrosis factor, alpha-induced protein 3
ENSOCUG00000011012	ENSMUSG00000025075	226243	MGI:1196378	Habp2	hyaluronic acid binding protein 2
ENSOCUG00000006447	ENSMUSG00000018677	68066	MGI:1196386	Slc25a39	solute carrier family 25, member 39
ENSOCUG00000011501	ENSMUSG00000039176	18975	MGI:1196389	Polg	polymerase (DNA directed), gamma
ENSOCUG00000017745	ENSMUSG00000007080	18973	MGI:1196391	Pole	polymerase (DNA directed), epsilon
ENSOCUG00000023134	ENSMUSG00000032123	13478	MGI:1196396	Dpagt1	dolichyl-phosphate (UDP-N-acetylglucosamine) acetylglucosaminephosphotransferase 1 (GlcNAc-1-P transferase)
ENSOCUG00000001588	ENSMUSG00000047710	101994	MGI:1196398	Champ1	chromosome alignment maintaining phosphoprotein 1
ENSOCUG00000000128	ENSMUSG00000022864	67102	MGI:1196400	D16Ertd472e	DNA segment, Chr 16, ERATO Doi 472, expressed
ENSOCUG00000014971	ENSMUSG00000033847	232889	MGI:1196403	Pla2g4c	phospholipase A2, group IVC (cytosolic, calcium-independent)
ENSOCUG00000005366	ENSMUSG00000033411	329506	MGI:1196405	Ctdspl2	CTD (carboxy-terminal domain, RNA polymerase II, polypeptide A) small phosphatase like 2
ENSOCUG00000010105	ENSMUSG00000012535	320938	MGI:1196412	Tnpo3	transportin 3
ENSOCUG00000010561	ENSMUSG00000026563	27878	MGI:1196415	Tada1	transcriptional adaptor 1
ENSOCUG00000007468	ENSMUSG00000034563	72278	MGI:1196419	Ccpg1	cell cycle progression 1
ENSOCUG00000003312	ENSMUSG00000043013	15379	MGI:1196423	Onecut1	one cut domain, family member 1
ENSOCUG00000016144	ENSMUSG00000027244	51897	MGI:1196429	Atg13	autophagy related 13
ENSOCUG00000003520	ENSMUSG00000002428	20585	MGI:1196437	Hltf	helicase-like transcription factor
ENSOCUG00000022911	ENSMUSG00000053411	52609	MGI:1196439	Cbx7	chromobox 7
ENSOCUG00000014780	ENSMUSG00000028986	52323	MGI:1196453	Klhl7	kelch-like 7
ENSOCUG00000016682	ENSMUSG00000002608	52132	MGI:1196455	Ccdc97	coiled-coil domain containing 97
ENSOCUG00000001211	ENSMUSG00000054428	11983	MGI:1196457	Atpif1	ATPase inhibitory factor 1
ENSOCUG00000003388	ENSMUSG00000029426	12492	MGI:1196458	Scarb2	scavenger receptor class B, member 2
ENSOCUG00000014679	ENSMUSG00000033487	319448	MGI:1196463	Fndc3a	fibronectin type III domain containing 3A
ENSOCUG00000023375	ENSMUSG00000032915	52614	MGI:1196464	Adgre4	adhesion G protein-coupled receptor E4
ENSOCUG00000007355	ENSMUSG00000044393	13511	MGI:1196466	Dsg2	desmoglein 2
ENSOCUG00000009087	ENSMUSG00000017007	19668	MGI:1196616	Rbpjl	recombination signal binding protein for immunoglobulin kappa J region-like
ENSOCUG00000024298	ENSMUSG00000037966	18081	MGI:1196617	Ninj1	ninjurin 1
ENSOCUG00000005780	ENSMUSG00000001249	15451	MGI:1196620	Hpn	hepsin
ENSOCUG00000007474	ENSMUSG00000033813	21399	MGI:1196624	Tcea1	transcription elongation factor A (SII) 1
ENSOCUG00000003249	ENSMUSG00000044674	14362	MGI:1196625	Fzd1	frizzled class receptor 1
ENSOCUG00000020985	ENSMUSG00000028747	15565	MGI:1196627	Htr6	5-hydroxytryptamine (serotonin) receptor 6
ENSOCUG00000014063	ENSMUSG00000001604	21401	MGI:1196908	Tcea3	transcription elongation factor A (SII), 3
ENSOCUG00000009949	ENSMUSG00000022661	17470	MGI:1196990	Cd200	CD200 antigen
ENSOCUG00000015278	ENSMUSG00000017453	19193	MGI:1197006	Pipox	pipecolic acid oxidase
ENSOCUG00000010109	ENSMUSG00000032000	11796	MGI:1197007	Birc3	baculoviral IAP repeat-containing 3
ENSOCUG00000016390	ENSMUSG00000005124	22402	MGI:1197008	Wisp1	WNT1 inducible signaling pathway protein 1
ENSOCUG00000013890	ENSMUSG00000057367	11797	MGI:1197009	Birc2	baculoviral IAP repeat-containing 2
ENSOCUG00000023570	ENSMUSG00000026021	22218	MGI:1197010	Sumo1	small ubiquitin-like modifier 1
ENSOCUG00000004540	ENSMUSG00000050963	16539	MGI:1197011	Kcns2	K+ voltage-gated channel, subfamily S, 2
ENSOCUG00000014914	ENSMUSG00000020473	11568	MGI:1197012	Aebp1	AE binding protein 1
ENSOCUG00000010574	ENSMUSG00000002307	13163	MGI:1197015	Daxx	Fas death domain-associated protein
ENSOCUG00000022113	ENSMUSG00000040164	16538	MGI:1197019	Kcns1	K+ voltage-gated channel, subfamily S, 1
ENSOCUG00000015480	ENSMUSG00000020974	18974	MGI:1197514	Pole2	polymerase (DNA directed), epsilon 2 (p59 subunit)
ENSOCUG00000024264	ENSMUSG00000060969	16371	MGI:1197515	Irx1	Iroquois homeobox 1
ENSOCUG00000002315	ENSMUSG00000020451	16886	MGI:1197517	Limk2	LIM motif-containing protein kinase 2
ENSOCUG00000007385	ENSMUSG00000027381	12125	MGI:1197519	Bcl2l11	BCL2-like 11 (apoptosis facilitator)
ENSOCUG00000012062	ENSMUSG00000022857	19146	MGI:1197523	Tmprss15	transmembrane protease, serine 15
ENSOCUG00000009172	ENSMUSG00000001504	16372	MGI:1197526	Irx2	Iroquois homeobox 2
ENSOCUG00000006409	ENSMUSG00000002814	21975	MGI:1197527	Top3a	topoisomerase (DNA) III alpha
ENSOCUG00000014189	ENSMUSG00000021950	11752	MGI:1201374	Anxa8	annexin A8
ENSOCUG00000017878	ENSMUSG00000029484	11745	MGI:1201378	Anxa3	annexin A3
ENSOCUG00000004330	ENSMUSG00000053510	230598	MGI:1201386	Nrd1	nardilysin, N-arginine dibasic convertase, NRD convertase 1
ENSOCUG00000007764	ENSMUSG00000017376	18099	MGI:1201387	Nlk	nemo like kinase
ENSOCUG00000014571	ENSMUSG00000032502	20840	MGI:1201400	Stac	src homology three (SH3) and cysteine rich domain
ENSOCUG00000011958	ENSMUSG00000042262	12776	MGI:1201402	Ccr8	chemokine (C-C motif) receptor 8
ENSOCUG00000008391	ENSMUSG00000024366	14587	MGI:1201403	Gfra3	glial cell line derived neurotrophic factor family receptor alpha 3
ENSOCUG00000005443	ENSMUSG00000023073	20494	MGI:1201406	Slc10a2	solute carrier family 10, member 2
ENSOCUG00000026940	ENSMUSG00000030733	20399	MGI:1201407	Sh2b1	SH2B adaptor protein 1
ENSOCUG00000006746	ENSMUSG00000062604	20817	MGI:1201408	Srpk2	serine/arginine-rich protein specific kinase 2
ENSOCUG00000017650	ENSMUSG00000006705	18771	MGI:1201409	Pknox1	Pbx/knotted 1 homeobox
ENSOCUG00000025839	ENSMUSG00000025350	19682	MGI:1201412	Rdh5	retinol dehydrogenase 5
ENSOCUG00000010374	ENSMUSG00000038192	12622	MGI:1201414	Cer1	cerberus 1, DAN family BMP antagonist
ENSOCUG00000007602	ENSMUSG00000051022	15476	MGI:1201606	Hs3st1	heparan sulfate (glucosamine) 3-O-sulfotransferase 1
ENSOCUG00000008982	ENSMUSG00000026577	66352	MGI:1201607	Blzf1	basic leucine zipper nuclear factor 1
ENSOCUG00000014682	ENSMUSG00000046607	12123	MGI:1201608	Hrk	harakiri, BCL2 interacting protein (contains only BH3 domain)
ENSOCUG00000007819	ENSMUSG00000089911	15247	MGI:1201609	Mfsd14a	major facilitator superfamily domain containing 14A
ENSOCUG00000012275	ENSMUSG00000090626	21778	MGI:1201610	Tex9	testis expressed gene 9
ENSOCUG00000005143	ENSMUSG00000005625	19185	MGI:1201670	Psmd4	proteasome (prosome, macropain) 26S subunit, non-ATPase, 4
ENSOCUG00000004762	ENSMUSG00000023805	20975	MGI:1201671	Synj2	synaptojanin 2
ENSOCUG00000029123	ENSMUSG00000027833	20429	MGI:1201673	Shox2	short stature homeobox 2
ENSOCUG00000010158	ENSMUSG00000028458	21754	MGI:1201675	Tesk1	testis specific protein kinase 1
ENSOCUG00000002733	ENSMUSG00000020866	12291	MGI:1201678	Cacna1g	calcium channel, voltage-dependent, T type, alpha 1G subunit
ENSOCUG00000003103	ENSMUSG00000022865	13052	MGI:1201679	Cxadr	coxsackie virus and adenovirus receptor
ENSOCUG00000016329	ENSMUSG00000035901	19347	MGI:1201681	Dennd5a	DENN/MADD domain containing 5A
ENSOCUG00000015790	ENSMUSG00000003779	19348	MGI:1201682	Kif20a	kinesin family member 20A
ENSOCUG00000000451	ENSMUSG00000032446	13813	MGI:1201683	Eomes	eomesodermin
ENSOCUG00000006908	ENSMUSG00000002664	19197	MGI:1201684	Pspn	persephin
ENSOCUG00000007076	ENSMUSG00000030970	13017	MGI:1201686	Ctbp2	C-terminal binding protein 2
ENSOCUG00000010563	ENSMUSG00000024308	21356	MGI:1201689	Tapbp	TAP binding protein
ENSOCUG00000003302	ENSMUSG00000055407	17760	MGI:1201690	Map6	microtubule-associated protein 6
ENSOCUG00000004998	ENSMUSG00000029110	19822	MGI:1201691	Rnf4	ring finger protein 4
ENSOCUG00000027124	ENSMUSG00000003380	14470	MGI:1201692	Rabac1	Rab acceptor 1 (prenylated)
ENSOCUG00000011850	ENSMUSG00000013160	11972	MGI:1201778	Atp6v0d1	ATPase, H+ transporting, lysosomal V0 subunit D1
ENSOCUG00000006387	ENSMUSG00000045427	56258	MGI:1201779	Hnrnph2	heterogeneous nuclear ribonucleoprotein H2
ENSOCUG00000006473	ENSMUSG00000052459	11964	MGI:1201780	Atp6v1a	ATPase, H+ transporting, lysosomal V1 subunit A
ENSOCUG00000016034	ENSMUSG00000009654	18302	MGI:1201782	Oit3	oncoprotein induced transcript 3
ENSOCUG00000002770	ENSMUSG00000021749	18300	MGI:1201784	Oit1	oncoprotein induced transcript 1
ENSOCUG00000010570	ENSMUSG00000009687	18301	MGI:1201785	Fxyd5	FXYD domain-containing ion transport regulator 5
ENSOCUG00000010937	ENSMUSG00000020027	216233	MGI:1201787	Socs2	suppressor of cytokine signaling 2
ENSOCUG00000027946	ENSMUSG00000079435	19982	MGI:1201789	Rpl36a	ribosomal protein L36A
ENSOCUG00000023172	ENSMUSG00000053113	12702	MGI:1201791	Socs3	suppressor of cytokine signaling 3
ENSOCUG00000016522	ENSMUSG00000059173	18573	MGI:1201792	Pde1a	phosphodiesterase 1A, calmodulin-dependent
ENSOCUG00000022751	ENSMUSG00000028081	20091	MGI:1202063	Rps3a1	ribosomal protein S3A1
ENSOCUG00000006205	ENSMUSG00000009487	18419	MGI:1202064	Otog	otogelin
ENSOCUG00000014703	ENSMUSG00000032113	12649	MGI:1202065	Chek1	checkpoint kinase 1
ENSOCUG00000011065	ENSMUSG00000078974	20335	MGI:1202066	Sec61g	SEC61, gamma subunit
ENSOCUG00000013873	ENSMUSG00000031189	14266	MGI:1202294	Aff2	AF4/FMR2 family, member 2
ENSOCUG00000015930	ENSMUSG00000033068	12497	MGI:1202295	Entpd6	ectonucleoside triphosphate diphosphohydrolase 6
ENSOCUG00000011346	ENSMUSG00000049313	20660	MGI:1202296	Sorl1	sortilin-related receptor, LDLR class A repeats-containing
ENSOCUG00000017607	ENSMUSG00000026643	18108	MGI:1202298	Nmt2	N-myristoyltransferase 2
ENSOCUG00000022744	ENSMUSG00000031576	16532	MGI:1202300	Kcnu1	potassium channel, subfamily U, member 1
ENSOCUG00000015354	ENSMUSG00000027598	16396	MGI:1202301	Itch	itchy, E3 ubiquitin protein ligase
ENSOCUG00000012511	ENSMUSG00000026098	227099	MGI:1202302	Pms1	PMS1 homolog 1, mismatch repair system component
ENSOCUG00000003858	ENSMUSG00000002769	14711	MGI:1202304	Gnmt	glycine N-methyltransferase
ENSOCUG00000021424	ENSMUSG00000008958	21427	MGI:1202305	Vps72	vacuolar protein sorting 72
ENSOCUG00000013324	ENSMUSG00000045471	15171	MGI:1202306	Hcrt	hypocretin
ENSOCUG00000001667	ENSMUSG00000024740	13194	MGI:1202384	Ddb1	damage specific DNA binding protein 1
ENSOCUG00000008152	ENSMUSG00000040220	104346	MGI:1202386	Gas8	growth arrest specific 8
ENSOCUG00000011000	ENSMUSG00000033066	14457	MGI:1202388	Gas7	growth arrest specific 7
ENSOCUG00000000310	ENSMUSG00000032394	19289	MGI:1202390	Igdcc3	immunoglobulin superfamily, DCC subclass, member 3
ENSOCUG00000000158	ENSMUSG00000022561	14731	MGI:1202392	Gpaa1	GPI anchor attachment protein 1
ENSOCUG00000003643	ENSMUSG00000024682	14603	MGI:1202394	Gif	gastric intrinsic factor
ENSOCUG00000001092	ENSMUSG00000005800	17394	MGI:1202395	Mmp8	matrix metallopeptidase 8
ENSOCUG00000000876	ENSMUSG00000035161	18130	MGI:1202397	Ints6	integrator complex subunit 6
ENSOCUG00000013394	ENSMUSG00000019932	16545	MGI:1202398	Kera	keratocan
ENSOCUG00000002155	ENSMUSG00000003435	20924	MGI:1202400	Supt5	suppressor of Ty 5
ENSOCUG00000025535	ENSMUSG00000022101	14171	MGI:1202401	Fgf17	fibroblast growth factor 17
ENSOCUG00000008175	ENSMUSG00000069094	18583	MGI:1202402	Pde7a	phosphodiesterase 7A
ENSOCUG00000017105	ENSMUSG00000029205	231252	MGI:1202403	Chrna9	cholinergic receptor, nicotinic, alpha polypeptide 9
ENSOCUG00000011001	ENSMUSG00000021611	21752	MGI:1202709	Tert	telomerase reverse transcriptase
ENSOCUG00000017191	ENSMUSG00000030217	109978	MGI:1202710	Art4	ADP-ribosyltransferase 4
ENSOCUG00000016186	ENSMUSG00000023926	19743	MGI:1202713	Rhag	Rhesus blood group-associated A glycoprotein
ENSOCUG00000017761	ENSMUSG00000045680	21412	MGI:1202715	Tcf21	transcription factor 21
ENSOCUG00000014545	ENSMUSG00000019969	19164	MGI:1202717	Psen1	presenilin 1
ENSOCUG00000002063	ENSMUSG00000060261	14886	MGI:1202722	Gtf2i	general transcription factor II I
[truncated: 13,180 more rows]
