# Supplementary material for: Transcriptomics as Precision Medicine to Classify <em>In Vivo</em> Models of Dietary-Induced Atherosclerosis at Cellular and Molecular Levels
Source: Preprints.org preprint supplement (doi:10.20944/preprints201809.0082.v1), 2018-09-05
Supplement: Supplementary file 13 [file Supplemental_Table_2.xlsx]

## Sheet: Sample_alignment_information
Accession ID	Sample nane	Species	Sex	Run ID(s)	Layout	Total spots	STAR aligned	% aligned
SRX2544726	in vivo_WT 1_SL142922	Mus musculus	male	SRR5237677, SRR5237678	paired	30120216	53893608	89.46
SRX2544727	in vivo_WT 2_SL142923	Mus musculus	male	SRR5237679, SRR5237680	paired	33771209	61397648	90.9
SRX2544728	in vivo_WT 3_SL142924	Mus musculus	male	SRR5237681, SRR5237682	paired	38477461	67805602	88.11
SRX864779	NZW-HFHC-Aorta 1 RNA	Oryctolagus cuniculus	male (Ddx3y↑, Xist↓)	SRR1789333	paired	34619074	57883492	83.6
SRX864780	NZW-HFHC-Aorta 2 RNA	Oryctolagus cuniculus	male (Ddx3y↑, Xist↓)	SRR1789334	paired	34536892	54206114	78.48
SRX864782	NZW-HFHC-Aorta 3 RNA	Oryctolagus cuniculus	male (Ddx3y↑, Xist↓)	SRR1789335	paired	29142105	44199098	75.83
SRX864783	NZW-HFHC-Aorta 4 RNA	Oryctolagus cuniculus	male (Ddx3y↑, Xist↓)	SRR1789336	paired	30758797	50205152	81.61
