# Supplementary material for: Transcriptomics as Precision Medicine to Classify <em>In Vivo</em> Models of Dietary-Induced Atherosclerosis at Cellular and Molecular Levels
Source: Preprints.org preprint supplement (doi:10.20944/preprints201809.0082.v1), 2018-09-05
Supplement: Supplementary file 15 [file Supplemental_Table_3.xlsx]

## Sheet: Mouse_gene_counts
SRX ID	SRX2544726	SRX2544727	SRX2544728
Sample Designation	WT_C1	WT_C2	WT_C3
ENSMUSG00000000001	2922	4062	3308
ENSMUSG00000000003	0	0	0
ENSMUSG00000000028	95	117	142
ENSMUSG00000000031	73	55	65
ENSMUSG00000000037	70	48	54
ENSMUSG00000000049	13	17	12
ENSMUSG00000000056	829	1101	1002
ENSMUSG00000000058	2678	2231	2253
ENSMUSG00000000078	5010	7192	6288
ENSMUSG00000000085	991	1121	1201
ENSMUSG00000000088	553	827	631
ENSMUSG00000000093	173	559	305
ENSMUSG00000000094	3	0	2
ENSMUSG00000000103	0	0	0
ENSMUSG00000000120	994	16250	1450
ENSMUSG00000000125	0	4	0
ENSMUSG00000000126	230	220	186
ENSMUSG00000000127	1343	1439	1399
ENSMUSG00000000131	2046	2686	2714
ENSMUSG00000000134	1094	1478	1524
ENSMUSG00000000142	143	169	201
ENSMUSG00000000148	463	666	518
ENSMUSG00000000149	2296	3174	3038
ENSMUSG00000000154	59	102	79
ENSMUSG00000000157	2	4	4
ENSMUSG00000000159	6	6	6
ENSMUSG00000000167	25	34	21
ENSMUSG00000000168	1537	2496	1688
ENSMUSG00000000171	1498	2087	1526
ENSMUSG00000000182	7	24	22
ENSMUSG00000000183	0	0	0
ENSMUSG00000000184	5652	6379	6422
ENSMUSG00000000194	2255	3158	2897
ENSMUSG00000000197	1114	2302	985
ENSMUSG00000000202	16	15	12
ENSMUSG00000000204	110	703	154
ENSMUSG00000000214	544	9634	747
ENSMUSG00000000215	0	0	0
ENSMUSG00000000216	0	2	2
ENSMUSG00000000223	102	374	90
ENSMUSG00000000244	105	177	116
ENSMUSG00000000247	2	0	0
ENSMUSG00000000248	22	73	80
ENSMUSG00000000253	180	342	201
ENSMUSG00000000263	4	2	0
ENSMUSG00000000266	839	1085	853
ENSMUSG00000000275	1492	2709	2176
ENSMUSG00000000276	617	957	564
ENSMUSG00000000278	3136	3770	3504
ENSMUSG00000000282	607	728	853
ENSMUSG00000000290	4092	5629	6278
ENSMUSG00000000295	152	329	181
ENSMUSG00000000296	74	352	63
ENSMUSG00000000301	54	58	30
ENSMUSG00000000303	84	274	62
ENSMUSG00000000305	109	100	86
ENSMUSG00000000308	44	808	50
ENSMUSG00000000317	251	299	439
ENSMUSG00000000318	689	432	816
ENSMUSG00000000320	69	81	171
ENSMUSG00000000325	690	3030	793
ENSMUSG00000000326	1630	1764	1942
ENSMUSG00000000339	234	491	289
ENSMUSG00000000340	530	549	546
ENSMUSG00000000346	2513	3284	2857
ENSMUSG00000000355	447	610	452
ENSMUSG00000000359	188	178	231
ENSMUSG00000000365	18	32	29
ENSMUSG00000000374	1719	2884	2247
ENSMUSG00000000378	703	1015	896
ENSMUSG00000000381	2	2	0
ENSMUSG00000000384	446	620	566
ENSMUSG00000000385	5	17	10
ENSMUSG00000000386	350	753	450
ENSMUSG00000000392	844	1171	783
ENSMUSG00000000394	0	0	0
ENSMUSG00000000399	1196	1582	1090
ENSMUSG00000000402	2	12	6
ENSMUSG00000000409	90	109	152
ENSMUSG00000000411	1	8	4
ENSMUSG00000000416	148	263	208
ENSMUSG00000000420	3185	4156	3765
ENSMUSG00000000435	0	0	0
ENSMUSG00000000439	558	622	559
ENSMUSG00000000440	646	449	764
ENSMUSG00000000441	1571	1733	1775
ENSMUSG00000000486	96	131	163
ENSMUSG00000000489	1106	1917	1669
ENSMUSG00000000530	2014	2118	2271
ENSMUSG00000000531	235	260	326
ENSMUSG00000000532	1291	1889	1626
ENSMUSG00000000538	2880	4757	3347
ENSMUSG00000000544	0	1	0
ENSMUSG00000000552	309	413	476
ENSMUSG00000000555	5751	6622	7987
ENSMUSG00000000560	0	10	2
ENSMUSG00000000561	389	679	423
ENSMUSG00000000562	17	16	14
ENSMUSG00000000563	2684	3968	2920
ENSMUSG00000000567	350	486	426
ENSMUSG00000000568	1324	1613	1570
ENSMUSG00000000579	54	92	61
ENSMUSG00000000581	715	1264	849
ENSMUSG00000000594	3494	3853	4407
ENSMUSG00000000600	2366	3150	2665
ENSMUSG00000000605	2148	3380	2571
ENSMUSG00000000606	0	2	0
ENSMUSG00000000617	0	0	2
ENSMUSG00000000627	60	313	60
ENSMUSG00000000628	1904	1930	2525
ENSMUSG00000000631	3110	5079	4627
ENSMUSG00000000632	18	129	10
ENSMUSG00000000673	31	67	44
ENSMUSG00000000682	601	1094	672
ENSMUSG00000000686	122	131	119
ENSMUSG00000000690	67	28	30
ENSMUSG00000000693	2518	3265	3009
ENSMUSG00000000701	0	0	0
ENSMUSG00000000706	0	3	0
ENSMUSG00000000708	2076	2392	2486
ENSMUSG00000000711	2506	3901	2630
ENSMUSG00000000724	23	36	29
ENSMUSG00000000730	12	10	12
ENSMUSG00000000731	0	2	2
ENSMUSG00000000732	584	722	757
ENSMUSG00000000738	1110	1461	1264
ENSMUSG00000000739	161	98	210
ENSMUSG00000000740	5841	6653	7194
ENSMUSG00000000743	1474	2269	1908
ENSMUSG00000000751	1094	1463	1285
ENSMUSG00000000753	4381	2822	3781
ENSMUSG00000000759	1132	1366	1365
ENSMUSG00000000766	17	34	16
ENSMUSG00000000776	456	613	490
ENSMUSG00000000782	66	114	136
ENSMUSG00000000787	11609	14581	10777
ENSMUSG00000000791	9	51	28
ENSMUSG00000000792	33	235	12
ENSMUSG00000000794	403	1647	428
ENSMUSG00000000804	1825	3934	2321
ENSMUSG00000000805	15	32	32
ENSMUSG00000000811	316	382	356
ENSMUSG00000000817	6	26	12
ENSMUSG00000000823	1284	1396	1654
ENSMUSG00000000826	2891	5501	3694
ENSMUSG00000000827	1871	2266	2063
ENSMUSG00000000838	1593	1878	1521
ENSMUSG00000000861	101	110	100
ENSMUSG00000000869	31	64	25
ENSMUSG00000000876	400	458	415
ENSMUSG00000000881	795	1128	1063
ENSMUSG00000000884	60	93	77
ENSMUSG00000000889	876	15187	1443
ENSMUSG00000000901	288	314	339
ENSMUSG00000000902	1073	1377	1195
ENSMUSG00000000903	2	2	2
ENSMUSG00000000915	1230	1181	1561
ENSMUSG00000000916	231	278	257
ENSMUSG00000000934	159	234	205
ENSMUSG00000000938	2	12	6
ENSMUSG00000000942	50	38	57
ENSMUSG00000000948	105	298	98
ENSMUSG00000000957	4967	6291	6255
ENSMUSG00000000958	397	645	499
ENSMUSG00000000959	578	747	671
ENSMUSG00000000976	719	1012	906
ENSMUSG00000000982	108	192	121
ENSMUSG00000000983	5	9	8
ENSMUSG00000001014	0	0	0
ENSMUSG00000001016	1036	1349	1024
ENSMUSG00000001017	2357	2856	2341
ENSMUSG00000001018	978	1276	1052
ENSMUSG00000001020	907	1088	1027
ENSMUSG00000001021	1	13	5
ENSMUSG00000001023	0	0	0
ENSMUSG00000001025	3955	4272	3823
ENSMUSG00000001027	10	32	18
ENSMUSG00000001029	328	274	348
ENSMUSG00000001034	458	510	489
ENSMUSG00000001036	2320	2612	2554
ENSMUSG00000001039	166	187	172
ENSMUSG00000001052	1571	2148	1913
ENSMUSG00000001053	178	156	244
ENSMUSG00000001054	527	679	622
ENSMUSG00000001056	325	567	477
ENSMUSG00000001062	413	663	611
ENSMUSG00000001065	542	756	694
ENSMUSG00000001076	0	2	0
ENSMUSG00000001082	557	615	576
ENSMUSG00000001089	3372	4825	4323
ENSMUSG00000001095	2	3	2
ENSMUSG00000001098	3027	3236	2949
ENSMUSG00000001100	926	1108	1059
ENSMUSG00000001103	4	8	6
ENSMUSG00000001105	722	843	716
ENSMUSG00000001119	18930	17339	17789
ENSMUSG00000001120	329	2594	408
ENSMUSG00000001123	1040	1560	1389
ENSMUSG00000001127	1845	2767	2225
ENSMUSG00000001128	1215	1697	1492
ENSMUSG00000001131	4124	4735	3350
ENSMUSG00000001134	127	192	186
ENSMUSG00000001138	584	772	804
ENSMUSG00000001143	474	772	651
ENSMUSG00000001150	1432	2010	1874
ENSMUSG00000001151	2038	2410	2740
ENSMUSG00000001155	11	5	7
ENSMUSG00000001156	373	811	491
ENSMUSG00000001157	457	796	551
ENSMUSG00000001158	450	597	427
ENSMUSG00000001166	54	162	84
ENSMUSG00000001168	19	27	18
ENSMUSG00000001173	1278	2177	1572
ENSMUSG00000001175	13766	28750	15418
ENSMUSG00000001211	2468	2697	2824
ENSMUSG00000001225	4	0	40
ENSMUSG00000001227	278	384	360
ENSMUSG00000001228	237	380	380
ENSMUSG00000001229	1043	1464	1371
ENSMUSG00000001240	606	620	885
ENSMUSG00000001247	89	108	99
ENSMUSG00000001248	1432	1964	2010
ENSMUSG00000001249	48	66	70
ENSMUSG00000001260	0	6	6
ENSMUSG00000001270	3173	5928	3788
ENSMUSG00000001280	4022	4188	3869
ENSMUSG00000001281	333	467	392
ENSMUSG00000001285	332	402	416
ENSMUSG00000001288	1348	1669	1797
ENSMUSG00000001289	1797	2346	2169
ENSMUSG00000001300	1792	1766	2058
ENSMUSG00000001305	304	327	357
ENSMUSG00000001313	249	298	334
ENSMUSG00000001323	296	406	318
ENSMUSG00000001333	727	796	898
ENSMUSG00000001334	28	52	40
ENSMUSG00000001348	1288	1290	1828
ENSMUSG00000001349	7904	6026	6601
ENSMUSG00000001366	797	1186	1038
ENSMUSG00000001376	1040	1923	1369
ENSMUSG00000001380	1053	1994	1233
ENSMUSG00000001383	944	1604	984
ENSMUSG00000001403	66	79	112
ENSMUSG00000001415	1564	2101	1880
ENSMUSG00000001416	2367	4065	2755
ENSMUSG00000001418	1455	1687	1778
ENSMUSG00000001419	1876	2418	2840
ENSMUSG00000001420	28	34	44
ENSMUSG00000001424	3895	5142	4899
ENSMUSG00000001435	22739	23832	29654
ENSMUSG00000001436	237	334	270
ENSMUSG00000001440	5116	7614	5861
ENSMUSG00000001441	1767	3010	2265
ENSMUSG00000001444	12	14	12
ENSMUSG00000001445	455	636	521
ENSMUSG00000001467	473	1924	475
ENSMUSG00000001472	5256	8932	6587
ENSMUSG00000001473	1454	1519	1653
ENSMUSG00000001482	804	1273	892
ENSMUSG00000001493	174	231	198
ENSMUSG00000001494	2471	1443	1590
ENSMUSG00000001496	0	4	0
ENSMUSG00000001497	80	102	83
ENSMUSG00000001504	16	24	22
ENSMUSG00000001506	89047	124583	127678
ENSMUSG00000001507	3106	3384	2931
ENSMUSG00000001508	165	113	194
ENSMUSG00000001510	12	16	15
ENSMUSG00000001517	118	181	232
ENSMUSG00000001518	355	472	400
ENSMUSG00000001520	83	154	102
ENSMUSG00000001521	567	667	750
ENSMUSG00000001524	192	282	253
ENSMUSG00000001525	7409	15358	8924
ENSMUSG00000001542	1744	2479	1981
ENSMUSG00000001552	1456	1917	1553
ENSMUSG00000001555	1996	2226	2472
ENSMUSG00000001558	10	15	10
ENSMUSG00000001566	0	0	0
ENSMUSG00000001569	801	1064	986
ENSMUSG00000001576	2463	2821	2728
ENSMUSG00000001583	41	52	60
ENSMUSG00000001588	98	193	160
ENSMUSG00000001604	288	210	345
ENSMUSG00000001622	0	0	0
ENSMUSG00000001627	1177	1452	1317
ENSMUSG00000001630	4656	6087	5203
ENSMUSG00000001632	1011	1381	1427
ENSMUSG00000001642	1225	2321	1416
ENSMUSG00000001655	0	2	0
ENSMUSG00000001656	0	0	0
ENSMUSG00000001657	0	0	2
ENSMUSG00000001661	12	23	6
ENSMUSG00000001663	914	710	899
ENSMUSG00000001665	262	199	231
ENSMUSG00000001666	101	136	139
ENSMUSG00000001670	4	0	0
ENSMUSG00000001672	6	2	4
ENSMUSG00000001674	488	694	589
ENSMUSG00000001687	2678	3924	3508
ENSMUSG00000001700	570	643	615
ENSMUSG00000001707	225	796	318
ENSMUSG00000001729	3193	4535	4602
ENSMUSG00000001739	72	87	87
ENSMUSG00000001741	1031	1337	1437
ENSMUSG00000001750	2787	4179	4856
ENSMUSG00000001751	1224	1433	1691
ENSMUSG00000001755	471	634	550
ENSMUSG00000001761	1711	1818	2033
ENSMUSG00000001763	40	63	47
ENSMUSG00000001767	793	961	840
ENSMUSG00000001768	5547	5222	5872
ENSMUSG00000001773	270	149	240
ENSMUSG00000001774	1206	2330	1436
ENSMUSG00000001783	2037	3183	2267
ENSMUSG00000001785	569	765	644
ENSMUSG00000001786	505	990	581
ENSMUSG00000001794	3333	5460	3628
ENSMUSG00000001802	539	708	619
ENSMUSG00000001804	0	0	0
ENSMUSG00000001815	0	0	0
ENSMUSG00000001819	0	0	0
ENSMUSG00000001823	0	0	0
ENSMUSG00000001827	7	4	8
ENSMUSG00000001829	938	1557	1010
ENSMUSG00000001833	4845	7341	4955
ENSMUSG00000001844	334	469	435
ENSMUSG00000001847	2524	3700	3288
ENSMUSG00000001855	1181	1567	1744
ENSMUSG00000001864	88	84	87
ENSMUSG00000001865	254	69	159
ENSMUSG00000001870	20435	16226	16867
ENSMUSG00000001891	2225	2639	2417
ENSMUSG00000001901	11	74	14
ENSMUSG00000001909	681	917	921
ENSMUSG00000001910	1617	2114	2004
ENSMUSG00000001911	5063	4980	6949
ENSMUSG00000001918	1602	1718	2126
ENSMUSG00000001924	6111	8779	6735
ENSMUSG00000001930	11480	13774	21356
ENSMUSG00000001942	792	1013	742
ENSMUSG00000001943	100	142	208
ENSMUSG00000001946	1234	1169	1782
ENSMUSG00000001948	14	24	28
ENSMUSG00000001962	587	798	844
ENSMUSG00000001964	514	599	484
ENSMUSG00000001983	123	239	170
ENSMUSG00000001985	48	349	59
ENSMUSG00000001986	346	867	447
ENSMUSG00000001988	16	31	30
ENSMUSG00000001995	1269	2225	1777
ENSMUSG00000001998	897	1162	1012
ENSMUSG00000001999	495	762	730
ENSMUSG00000002006	453	797	533
ENSMUSG00000002007	282	260	301
ENSMUSG00000002010	1959	1640	2053
ENSMUSG00000002012	363	324	375
ENSMUSG00000002014	1231	1399	1285
ENSMUSG00000002015	1837	2441	1890
ENSMUSG00000002017	710	1171	792
ENSMUSG00000002020	17444	26047	23788
ENSMUSG00000002028	4681	6614	6872
ENSMUSG00000002031	827	1002	860
ENSMUSG00000002032	46	255	59
ENSMUSG00000002033	58	145	91
ENSMUSG00000002043	242	292	230
ENSMUSG00000002052	3577	5150	4307
ENSMUSG00000002055	96	149	195
ENSMUSG00000002057	0	0	0
ENSMUSG00000002058	188	286	236
ENSMUSG00000002059	1010	1115	1336
ENSMUSG00000002064	955	1318	1071
ENSMUSG00000002068	40	120	47
ENSMUSG00000002076	7	8	16
ENSMUSG00000002083	104	105	122
ENSMUSG00000002100	24	18	98
ENSMUSG00000002102	2738	4189	2964
ENSMUSG00000002103	1794	2712	2566
ENSMUSG00000002104	59	64	115
ENSMUSG00000002105	928	1300	1281
ENSMUSG00000002107	4922	4915	5060
ENSMUSG00000002108	625	640	847
ENSMUSG00000002109	156	129	187
ENSMUSG00000002111	767	1171	1215
ENSMUSG00000002129	1271	1730	1521
ENSMUSG00000002147	3169	4214	4144
ENSMUSG00000002190	31	354	38
ENSMUSG00000002204	148	248	179
ENSMUSG00000002205	482	603	584
ENSMUSG00000002210	314	374	427
ENSMUSG00000002221	648	853	820
ENSMUSG00000002222	3084	3881	3318
ENSMUSG00000002227	437	620	596
ENSMUSG00000002228	123	168	181
ENSMUSG00000002233	2545	2724	2903
ENSMUSG00000002240	0	0	0
ENSMUSG00000002249	1111	1038	1484
ENSMUSG00000002250	410	610	743
ENSMUSG00000002257	296	477	429
ENSMUSG00000002265	2211	5246	2121
ENSMUSG00000002266	31	66	52
ENSMUSG00000002274	17	34	10
ENSMUSG00000002279	506	612	691
ENSMUSG00000002280	464	509	478
ENSMUSG00000002289	1347	1036	1356
ENSMUSG00000002297	139	309	233
ENSMUSG00000002307	544	715	666
ENSMUSG00000002308	163	261	178
ENSMUSG00000002319	546	743	616
ENSMUSG00000002320	1052	1389	1249
ENSMUSG00000002324	17	45	37
ENSMUSG00000002325	1128	1606	1423
ENSMUSG00000002326	169	251	176
ENSMUSG00000002329	511	805	577
ENSMUSG00000002332	820	1436	919
ENSMUSG00000002341	61	288	57
ENSMUSG00000002342	609	866	635
ENSMUSG00000002343	179	436	242
ENSMUSG00000002345	313	421	374
ENSMUSG00000002346	316	285	427
ENSMUSG00000002365	2205	2114	2248
ENSMUSG00000002372	979	1366	1347
ENSMUSG00000002379	538	758	500
ENSMUSG00000002384	24	17	15
ENSMUSG00000002393	374	411	497
ENSMUSG00000002395	1325	1458	1550
ENSMUSG00000002396	445	602	618
ENSMUSG00000002409	315	397	422
ENSMUSG00000002413	2698	3663	2720
ENSMUSG00000002416	416	733	480
ENSMUSG00000002428	1493	1966	1576
ENSMUSG00000002455	1719	2262	2084
ENSMUSG00000002458	421	620	522
ENSMUSG00000002459	10	47	18
ENSMUSG00000002475	80	249	74
ENSMUSG00000002477	379	559	346
ENSMUSG00000002486	310	365	396
ENSMUSG00000002489	948	1040	1109
ENSMUSG00000002496	2236	2937	2896
ENSMUSG00000002500	14	7	8
ENSMUSG00000002504	633	859	918
ENSMUSG00000002524	1960	2427	2117
ENSMUSG00000002546	2638	3333	3128
ENSMUSG00000002550	940	907	946
ENSMUSG00000002565	150	142	124
ENSMUSG00000002578	43	56	73
ENSMUSG00000002580	175	385	198
ENSMUSG00000002588	239	120	121
ENSMUSG00000002602	12831	14058	14840
ENSMUSG00000002603	877	1380	1597
ENSMUSG00000002608	729	995	963
ENSMUSG00000002617	342	600	385
ENSMUSG00000002625	938	1157	1216
ENSMUSG00000002633	0	0	0
ENSMUSG00000002635	274	329	375
ENSMUSG00000002658	893	1221	1033
ENSMUSG00000002660	384	508	458
ENSMUSG00000002661	140	156	126
ENSMUSG00000002664	4	4	4
ENSMUSG00000002668	246	438	357
ENSMUSG00000002679	277	372	320
ENSMUSG00000002688	522	516	568
ENSMUSG00000002699	616	929	810
ENSMUSG00000002718	1327	1756	1418
ENSMUSG00000002728	667	1026	788
ENSMUSG00000002731	462	703	479
ENSMUSG00000002732	932	826	846
ENSMUSG00000002733	733	1086	914
ENSMUSG00000002741	1947	2688	2315
ENSMUSG00000002748	4968	6579	6562
ENSMUSG00000002763	785	972	990
ENSMUSG00000002767	417	445	504
ENSMUSG00000002768	465	872	574
ENSMUSG00000002769	15	8	6
ENSMUSG00000002771	92	107	124
ENSMUSG00000002778	1808	2014	1813
ENSMUSG00000002781	299	333	361
ENSMUSG00000002791	2	10	6
ENSMUSG00000002797	243	389	224
ENSMUSG00000002799	187	542	230
ENSMUSG00000002803	430	619	573
ENSMUSG00000002804	94	115	88
ENSMUSG00000002808	2110	3838	2109
ENSMUSG00000002812	4199	5105	4873
ENSMUSG00000002814	355	390	370
ENSMUSG00000002820	459	561	583
ENSMUSG00000002825	174	205	226
ENSMUSG00000002831	9622	7610	11128
ENSMUSG00000002833	1137	1316	1379
ENSMUSG00000002835	126	140	165
ENSMUSG00000002844	690	1085	813
ENSMUSG00000002845	708	783	753
ENSMUSG00000002846	423	620	432
ENSMUSG00000002847	585	681	797
ENSMUSG00000002870	334	403	371
ENSMUSG00000002871	746	960	1099
ENSMUSG00000002881	2578	3260	2904
ENSMUSG00000002885	2773	2661	3368
ENSMUSG00000002897	937	1100	1263
ENSMUSG00000002900	2665	3359	3508
ENSMUSG00000002908	93	126	134
ENSMUSG00000002910	213	281	291
ENSMUSG00000002930	13	4	4
ENSMUSG00000002944	6462	5000	9622
ENSMUSG00000002948	533	755	590
ENSMUSG00000002949	815	1023	1055
ENSMUSG00000002957	3826	6753	4394
ENSMUSG00000002963	525	653	620
ENSMUSG00000002968	903	1268	1231
ENSMUSG00000002980	3650	6523	4327
ENSMUSG00000002981	1860	2822	2165
ENSMUSG00000002983	635	891	713
ENSMUSG00000002984	577	776	698
ENSMUSG00000002985	593	907	705
ENSMUSG00000002992	0	0	0
ENSMUSG00000002996	1343	1670	1557
ENSMUSG00000002997	1715	1133	1732
ENSMUSG00000003031	1438	2009	1543
ENSMUSG00000003032	1429	1354	1543
ENSMUSG00000003033	777	1349	1065
ENSMUSG00000003037	1335	1792	1622
ENSMUSG00000003038	607	745	827
ENSMUSG00000003039	1495	2181	1815
ENSMUSG00000003051	2	4	4
ENSMUSG00000003053	6	0	0
ENSMUSG00000003062	850	1325	1009
ENSMUSG00000003068	1695	2166	2275
ENSMUSG00000003070	22	38	24
ENSMUSG00000003072	1313	1725	1611
ENSMUSG00000003099	878	1209	994
ENSMUSG00000003119	2050	2740	2573
ENSMUSG00000003123	1573	914	1701
ENSMUSG00000003131	2689	4627	2840
ENSMUSG00000003134	625	905	703
ENSMUSG00000003135	444	593	435
ENSMUSG00000003153	285	3452	460
ENSMUSG00000003154	972	1304	1324
ENSMUSG00000003161	1894	2368	1842
ENSMUSG00000003166	1204	1717	1428
ENSMUSG00000003184	1018	1221	1284
ENSMUSG00000003190	107	100	106
ENSMUSG00000003198	163	232	197
ENSMUSG00000003199	920	1191	1132
ENSMUSG00000003200	811	1043	1014
ENSMUSG00000003206	15	29	19
ENSMUSG00000003208	183	158	213
ENSMUSG00000003226	8866	11582	9670
ENSMUSG00000003227	19	14	7
ENSMUSG00000003228	1746	1871	1931
ENSMUSG00000003233	583	697	884
ENSMUSG00000003234	1191	1465	1318
ENSMUSG00000003235	990	1486	1132
ENSMUSG00000003269	784	1006	872
ENSMUSG00000003271	4	6	8
ENSMUSG00000003273	169	217	211
ENSMUSG00000003279	342	455	258
ENSMUSG00000003282	170	148	128
ENSMUSG00000003283	627	1174	759
ENSMUSG00000003299	598	652	688
ENSMUSG00000003308	967	1419	1177
ENSMUSG00000003309	4	4	5
ENSMUSG00000003316	9671	11503	10794
ENSMUSG00000003341	3	24	4
ENSMUSG00000003344	528	1055	888
ENSMUSG00000003345	1607	2299	2302
ENSMUSG00000003346	504	637	649
ENSMUSG00000003348	281	463	288
ENSMUSG00000003352	734	1705	984
ENSMUSG00000003354	14	28	6
ENSMUSG00000003355	100	182	141
ENSMUSG00000003360	1952	2655	2516
ENSMUSG00000003363	5380	7379	8295
ENSMUSG00000003378	662	976	1042
ENSMUSG00000003379	10	20	50
ENSMUSG00000003380	1919	2804	2078
ENSMUSG00000003382	1642	2771	2121
ENSMUSG00000003402	1511	2083	1786
ENSMUSG00000003410	44	641	78
ENSMUSG00000003411	90	1509	104
ENSMUSG00000003418	187	231	229
ENSMUSG00000003420	2979	2587	3193
ENSMUSG00000003421	512	718	629
ENSMUSG00000003423	485	613	583
ENSMUSG00000003429	3279	3955	3999
ENSMUSG00000003435	2462	3117	2899
ENSMUSG00000003436	0	4	0
ENSMUSG00000003437	988	1292	1289
ENSMUSG00000003438	352	447	409
ENSMUSG00000003444	153	214	196
ENSMUSG00000003452	1712	2797	1620
ENSMUSG00000003458	2232	2823	2746
ENSMUSG00000003464	1283	1638	1547
ENSMUSG00000003469	14	156	30
ENSMUSG00000003476	94	55	90
ENSMUSG00000003477	1296	636	1150
ENSMUSG00000003484	175	330	273
ENSMUSG00000003500	704	955	928
ENSMUSG00000003505	0	0	0
ENSMUSG00000003518	4043	5336	5026
ENSMUSG00000003526	230	293	311
ENSMUSG00000003527	353	456	444
ENSMUSG00000003528	1196	3297	1320
ENSMUSG00000003531	205	347	281
ENSMUSG00000003534	926	1321	1299
ENSMUSG00000003541	341	615	411
ENSMUSG00000003545	152	323	411
ENSMUSG00000003546	671	1033	1134
ENSMUSG00000003549	398	453	432
ENSMUSG00000003555	1	4	7
ENSMUSG00000003559	189	375	325
ENSMUSG00000003573	473	582	783
ENSMUSG00000003575	606	785	714
ENSMUSG00000003581	536	740	726
ENSMUSG00000003585	144	181	205
ENSMUSG00000003604	235	333	290
ENSMUSG00000003617	7696	9356	7515
ENSMUSG00000003623	1218	1793	1401
ENSMUSG00000003644	520	827	687
ENSMUSG00000003657	0	0	2
ENSMUSG00000003660	4930	5886	5425
ENSMUSG00000003662	716	1068	812
ENSMUSG00000003665	216	321	218
ENSMUSG00000003680	516	657	584
ENSMUSG00000003721	1115	1448	1137
ENSMUSG00000003731	2022	2925	2413
ENSMUSG00000003746	3910	5077	4325
ENSMUSG00000003752	255	303	285
ENSMUSG00000003762	308	397	429
ENSMUSG00000003778	1712	2149	1922
ENSMUSG00000003779	166	165	193
ENSMUSG00000003808	650	827	831
ENSMUSG00000003809	472	561	560
ENSMUSG00000003810	1903	3040	2602
ENSMUSG00000003812	757	1045	1066
ENSMUSG00000003813	660	875	785
ENSMUSG00000003814	14974	16589	14182
ENSMUSG00000003824	48	62	51
ENSMUSG00000003847	8296	9717	8261
ENSMUSG00000003848	290	408	445
ENSMUSG00000003849	224	254	179
ENSMUSG00000003863	38	578	58
ENSMUSG00000003865	467	699	646
ENSMUSG00000003868	414	523	540
ENSMUSG00000003872	3	40	15
ENSMUSG00000003873	426	663	589
ENSMUSG00000003882	1434	2087	2450
ENSMUSG00000003923	498	722	600
ENSMUSG00000003929	395	652	451
ENSMUSG00000003934	21	44	10
ENSMUSG00000003948	703	1021	593
ENSMUSG00000003949	273	375	570
ENSMUSG00000003955	470	621	504
ENSMUSG00000003970	6915	7584	7957
ENSMUSG00000003974	44	55	37
ENSMUSG00000003992	931	914	906
ENSMUSG00000004018	161	204	205
ENSMUSG00000004031	8	354	38
ENSMUSG00000004032	362	631	321
ENSMUSG00000004035	85	100	82
ENSMUSG00000004038	4	6	5
ENSMUSG00000004040	6368	9099	7555
ENSMUSG00000004043	895	911	950
ENSMUSG00000004044	11137	9249	12758
ENSMUSG00000004054	926	1197	1186
ENSMUSG00000004056	2824	2925	3093
ENSMUSG00000004069	967	1276	1164
ENSMUSG00000004070	806	1291	892
ENSMUSG00000004071	1525	2322	1715
ENSMUSG00000004085	7909	7355	6756
ENSMUSG00000004096	1002	1320	1253
ENSMUSG00000004098	1184	2217	1396
ENSMUSG00000004099	1827	2488	2408
ENSMUSG00000004100	351	431	472
ENSMUSG00000004105	4907	6073	6006
ENSMUSG00000004110	39	69	67
ENSMUSG00000004113	113	1745	264
ENSMUSG00000004127	92	253	128
ENSMUSG00000004151	552	851	516
ENSMUSG00000004187	204	269	245
ENSMUSG00000004207	84875	100638	120733
ENSMUSG00000004221	1902	2401	2237
ENSMUSG00000004231	4	6	6
ENSMUSG00000004233	291	416	355
ENSMUSG00000004263	64	88	121
ENSMUSG00000004264	1024	1195	1271
ENSMUSG00000004266	1186	2299	1653
ENSMUSG00000004267	712	4098	1067
ENSMUSG00000004268	910	1072	1078
ENSMUSG00000004270	840	831	845
ENSMUSG00000004285	1023	1788	1255
ENSMUSG00000004296	4	15	6
ENSMUSG00000004317	946	1132	1100
ENSMUSG00000004319	1721	3034	2018
ENSMUSG00000004328	87	88	137
ENSMUSG00000004341	0	0	0
ENSMUSG00000004344	0	0	0
ENSMUSG00000004347	267	286	227
ENSMUSG00000004356	1481	1764	1711
ENSMUSG00000004359	36	18	46
ENSMUSG00000004360	55	386	78
ENSMUSG00000004364	2355	3403	2646
ENSMUSG00000004366	0	0	0
ENSMUSG00000004371	19	8	14
ENSMUSG00000004383	3195	3500	3059
ENSMUSG00000004393	492	817	619
ENSMUSG00000004394	1233	1655	1277
ENSMUSG00000004415	5	14	4
ENSMUSG00000004446	340	594	482
ENSMUSG00000004451	1408	1776	1722
ENSMUSG00000004455	1168	1517	1421
ENSMUSG00000004460	1935	2204	1805
ENSMUSG00000004462	279	472	375
ENSMUSG00000004473	1064	630	876
ENSMUSG00000004500	463	543	581
ENSMUSG00000004508	3426	3723	3377
ENSMUSG00000004530	3987	4835	4630
ENSMUSG00000004535	4572	6390	5196
ENSMUSG00000004540	0	2	0
ENSMUSG00000004542	0	0	0
ENSMUSG00000004552	10	37	43
ENSMUSG00000004558	3259	3871	2676
ENSMUSG00000004561	354	371	357
ENSMUSG00000004562	3074	3354	3672
ENSMUSG00000004565	976	1770	1500
ENSMUSG00000004567	757	1009	1122
ENSMUSG00000004568	1377	1587	1681
ENSMUSG00000004591	2567	3072	2857
ENSMUSG00000004609	638	773	809
ENSMUSG00000004610	280	260	309
ENSMUSG00000004612	30	72	43
ENSMUSG00000004626	593	866	925
ENSMUSG00000004630	8	9	0
ENSMUSG00000004631	1234	989	876
ENSMUSG00000004633	160	435	223
ENSMUSG00000004637	407	553	536
ENSMUSG00000004642	501	615	529
ENSMUSG00000004651	6	0	4
ENSMUSG00000004654	0	2	0
ENSMUSG00000004655	10524	11744	12009
ENSMUSG00000004661	216	281	307
ENSMUSG00000004665	3823	3738	4156
ENSMUSG00000004667	517	641	573
ENSMUSG00000004668	22	49	28
ENSMUSG00000004677	6709	7345	8625
ENSMUSG00000004698	1248	1216	1175
ENSMUSG00000004707	669	821	955
ENSMUSG00000004709	320	449	458
ENSMUSG00000004730	5026	6659	5177
ENSMUSG00000004748	66	106	86
ENSMUSG00000004768	714	779	733
ENSMUSG00000004771	1289	2542	1554
ENSMUSG00000004788	461	579	500
ENSMUSG00000004789	3347	3904	3834
ENSMUSG00000004791	120	229	176
ENSMUSG00000004798	2414	3257	2866
ENSMUSG00000004814	35	12	46
ENSMUSG00000004815	639	1033	927
ENSMUSG00000004821	0	0	0
ENSMUSG00000004837	227	207	261
ENSMUSG00000004842	2	1	4
ENSMUSG00000004843	940	1377	1087
ENSMUSG00000004846	2350	3121	2706
ENSMUSG00000004849	649	1336	872
ENSMUSG00000004864	31	50	45
ENSMUSG00000004865	1434	1999	1895
ENSMUSG00000004872	5	4	0
ENSMUSG00000004880	941	1050	1001
ENSMUSG00000004885	276	290	235
ENSMUSG00000004891	4479	4820	5261
ENSMUSG00000004892	21	165	19
ENSMUSG00000004894	2	0	6
ENSMUSG00000004895	526	850	562
ENSMUSG00000004896	559	700	739
ENSMUSG00000004897	1895	2822	2423
ENSMUSG00000004902	57	77	91
ENSMUSG00000004929	339	692	518
ENSMUSG00000004931	662	901	941
ENSMUSG00000004933	239	317	411
ENSMUSG00000004934	406	558	524
ENSMUSG00000004936	1719	3359	2033
ENSMUSG00000004937	1066	1342	1507
ENSMUSG00000004939	114	63	81
ENSMUSG00000004945	900	1166	964
ENSMUSG00000004947	413	511	505
ENSMUSG00000004948	0	2	0
ENSMUSG00000004951	1363	1251	1031
ENSMUSG00000004952	938	1530	1588
ENSMUSG00000004961	28	433	48
ENSMUSG00000004980	7015	9359	8245
ENSMUSG00000004988	31	65	53
ENSMUSG00000004994	170	208	266
ENSMUSG00000004996	324	384	365
ENSMUSG00000005034	3747	6922	3912
ENSMUSG00000005043	692	785	813
ENSMUSG00000005045	312	2749	455
ENSMUSG00000005054	1341	1788	1798
ENSMUSG00000005057	302	391	459
ENSMUSG00000005069	1022	1257	1162
ENSMUSG00000005078	484	837	531
ENSMUSG00000005087	6958	10727	8853
ENSMUSG00000005089	45	168	67
ENSMUSG00000005102	986	1214	1335
ENSMUSG00000005103	9104	11633	10194
ENSMUSG00000005107	158	210	203
ENSMUSG00000005124	841	1088	1104
ENSMUSG00000005125	2313	3354	2833
ENSMUSG00000005131	32	49	33
ENSMUSG00000005142	5736	7291	7865
ENSMUSG00000005148	66	117	52
ENSMUSG00000005150	214	286	255
ENSMUSG00000005161	1861	3583	2299
ENSMUSG00000005198	3657	4460	4827
ENSMUSG00000005202	0	0	0
ENSMUSG00000005204	1073	1615	1418
ENSMUSG00000005220	25	29	54
ENSMUSG00000005225	446	693	641
ENSMUSG00000005232	0	0	0
ENSMUSG00000005233	80	107	133
ENSMUSG00000005237	62	90	69
ENSMUSG00000005251	6	36	10
ENSMUSG00000005262	1041	1394	1156
ENSMUSG00000005267	393	469	373
ENSMUSG00000005268	23	18	28
ENSMUSG00000005299	1203	1659	1692
ENSMUSG00000005312	1804	3222	2111
ENSMUSG00000005320	9	8	10
ENSMUSG00000005338	649	3388	1135
ENSMUSG00000005339	31	16	18
ENSMUSG00000005354	769	1027	865
ENSMUSG00000005355	0	0	0
ENSMUSG00000005357	14	47	18
ENSMUSG00000005360	489	364	474
ENSMUSG00000005362	1249	2150	1229
ENSMUSG00000005364	0	0	4
ENSMUSG00000005370	695	863	751
ENSMUSG00000005371	2101	2786	2253
ENSMUSG00000005373	318	343	471
ENSMUSG00000005374	807	1100	958
ENSMUSG00000005378	333	422	386
ENSMUSG00000005397	7200	6091	8632
ENSMUSG00000005410	326	378	453
ENSMUSG00000005413	798	1145	1621
ENSMUSG00000005417	10166	12382	11641
ENSMUSG00000005442	3297	4457	4841
ENSMUSG00000005447	70	204	99
ENSMUSG00000005465	202	238	272
ENSMUSG00000005469	1424	3075	1705
ENSMUSG00000005470	58	78	58
ENSMUSG00000005474	2	2	3
ENSMUSG00000005481	593	739	777
ENSMUSG00000005483	742	1552	1076
ENSMUSG00000005493	16	14	13
ENSMUSG00000005501	1519	1869	1762
ENSMUSG00000005503	0	0	0
ENSMUSG00000005505	156	212	173
ENSMUSG00000005506	2570	3245	3187
ENSMUSG00000005510	826	960	753
ENSMUSG00000005514	2789	3263	3767
ENSMUSG00000005533	4583	5184	5134
ENSMUSG00000005534	3911	4563	4501
ENSMUSG00000005540	30	24	23
ENSMUSG00000005547	23	34	22
ENSMUSG00000005553	6	10	7
ENSMUSG00000005566	2174	2498	2391
ENSMUSG00000005575	798	1155	953
ENSMUSG00000005580	1267	1460	1497
ENSMUSG00000005583	3261	3147	3112
ENSMUSG00000005609	1145	1627	1359
ENSMUSG00000005610	18500	25394	21204
ENSMUSG00000005611	5538	5003	5838
ENSMUSG00000005615	2595	3241	3347
ENSMUSG00000005621	1317	1612	1823
ENSMUSG00000005625	1581	2321	1981
ENSMUSG00000005628	25	20	26
ENSMUSG00000005640	31	487	46
ENSMUSG00000005649	0	0	0
ENSMUSG00000005656	1358	2348	1492
ENSMUSG00000005667	290	592	411
ENSMUSG00000005672	497	647	690
ENSMUSG00000005674	222	297	215
ENSMUSG00000005677	3	4	5
ENSMUSG00000005681	29	18	8
ENSMUSG00000005682	717	907	1008
ENSMUSG00000005683	4712	4874	4687
ENSMUSG00000005686	664	1259	820
ENSMUSG00000005687	703	1079	859
ENSMUSG00000005696	2	10	10
ENSMUSG00000005698	1517	1830	1879
ENSMUSG00000005699	79	138	88
ENSMUSG00000005705	20	120	31
ENSMUSG00000005716	94	10	8
ENSMUSG00000005718	122	98	81
ENSMUSG00000005732	794	1135	886
ENSMUSG00000005763	56	79	80
ENSMUSG00000005774	408	470	446
ENSMUSG00000005779	2109	3290	2099
ENSMUSG00000005800	60	112	88
ENSMUSG00000005802	1593	2448	1598
ENSMUSG00000005803	1049	1210	1012
ENSMUSG00000005804	434	642	569
ENSMUSG00000005813	985	1482	1042
ENSMUSG00000005823	1180	1448	1357
ENSMUSG00000005824	42	73	46
ENSMUSG00000005836	1427	1057	1349
ENSMUSG00000005846	811	1177	926
ENSMUSG00000005864	2	4	1
ENSMUSG00000005871	4508	7383	5017
ENSMUSG00000005873	5047	10148	5266
ENSMUSG00000005881	1884	2173	2149
ENSMUSG00000005882	624	1104	699
ENSMUSG00000005883	2	8	18
ENSMUSG00000005886	2412	3210	2831
ENSMUSG00000005891	0	0	0
ENSMUSG00000005892	0	2	0
ENSMUSG00000005893	2082	2513	2332
ENSMUSG00000005897	410	468	500
ENSMUSG00000005899	573	808	866
ENSMUSG00000005907	513	693	679
ENSMUSG00000005917	2	0	0
ENSMUSG00000005936	1525	2222	1726
ENSMUSG00000005947	77	110	133
ENSMUSG00000005949	615	853	726
ENSMUSG00000005950	312	292	408
ENSMUSG00000005951	209	340	260
ENSMUSG00000005952	24	29	18
ENSMUSG00000005958	505	488	637
ENSMUSG00000005968	53	130	115
ENSMUSG00000005973	2656	2824	2819
ENSMUSG00000005980	104	136	121
ENSMUSG00000005981	1510	1804	1739
ENSMUSG00000005982	555	922	822
ENSMUSG00000005983	83	103	110
ENSMUSG00000005986	175	406	209
ENSMUSG00000005994	0	0	0
ENSMUSG00000006005	6693	8320	7814
ENSMUSG00000006007	1	2	0
ENSMUSG00000006010	1219	1899	1349
ENSMUSG00000006014	4741	6044	4779
ENSMUSG00000006019	509	570	642
ENSMUSG00000006021	267	303	297
ENSMUSG00000006024	1411	2616	1823
ENSMUSG00000006050	1086	1786	1383
ENSMUSG00000006056	0	0	0
ENSMUSG00000006057	694	1357	811
ENSMUSG00000006058	518	727	720
ENSMUSG00000006095	785	1342	757
ENSMUSG00000006127	1184	1461	1465
ENSMUSG00000006134	1083	1500	1174
ENSMUSG00000006143	2	4	0
ENSMUSG00000006154	265	305	327
ENSMUSG00000006169	2398	3197	2818
ENSMUSG00000006179	0	2	6
ENSMUSG00000006191	820	999	977
ENSMUSG00000006200	0	0	0
ENSMUSG00000006204	0	3	0
ENSMUSG00000006205	7611	8401	8789
ENSMUSG00000006215	455	551	559
ENSMUSG00000006216	1	9	2
ENSMUSG00000006218	2	12	8
ENSMUSG00000006219	10059	8758	11873
ENSMUSG00000006221	1807	1992	2659
ENSMUSG00000006235	18	17	33
ENSMUSG00000006241	113	156	151
ENSMUSG00000006262	1354	1857	1711
ENSMUSG00000006269	7	18	18
ENSMUSG00000006270	0	0	0
ENSMUSG00000006273	3926	10735	5870
ENSMUSG00000006276	1442	1771	1895
ENSMUSG00000006281	2744	3977	3820
ENSMUSG00000006288	771	1107	923
ENSMUSG00000006289	429	604	488
ENSMUSG00000006299	1659	2461	1953
ENSMUSG00000006301	3668	4323	3883
ENSMUSG00000006304	4595	6106	5420
ENSMUSG00000006307	1661	2222	2483
ENSMUSG00000006310	17	38	23
ENSMUSG00000006311	0	0	0
ENSMUSG00000006313	3	14	11
ENSMUSG00000006315	546	800	611
ENSMUSG00000006333	6882	8116	8296
ENSMUSG00000006335	217	268	285
ENSMUSG00000006342	514	2156	637
ENSMUSG00000006344	249	195	284
ENSMUSG00000006345	4	10	2
ENSMUSG00000006356	2010	3159	2178
ENSMUSG00000006360	3901	3652	4304
ENSMUSG00000006362	526	574	692
ENSMUSG00000006369	7214	3852	6276
ENSMUSG00000006373	2720	3927	2515
ENSMUSG00000006378	28	35	24
ENSMUSG00000006386	1853	1451	2267
ENSMUSG00000006389	4	12	16
ENSMUSG00000006390	954	1101	1171
ENSMUSG00000006392	566	708	602
ENSMUSG00000006395	398	415	528
ENSMUSG00000006398	131	105	174
ENSMUSG00000006403	452	406	394
ENSMUSG00000006411	140	198	201
ENSMUSG00000006412	262	372	270
ENSMUSG00000006418	867	1608	1301
ENSMUSG00000006423	1005	1228	1115
ENSMUSG00000006435	140	528	217
ENSMUSG00000006442	363	438	401
ENSMUSG00000006445	326	359	364
ENSMUSG00000006456	566	753	850
ENSMUSG00000006457	206	65	38
ENSMUSG00000006462	37	44	42
ENSMUSG00000006463	219	422	268
ENSMUSG00000006464	245	372	356
ENSMUSG00000006469	0	0	0
ENSMUSG00000006471	127	245	179
ENSMUSG00000006476	1263	1680	1703
ENSMUSG00000006488	0	0	0
ENSMUSG00000006490	0	0	0
ENSMUSG00000006494	677	843	803
ENSMUSG00000006498	2291	2644	2768
ENSMUSG00000006517	120	767	210
ENSMUSG00000006519	3111	3978	4548
ENSMUSG00000006522	368	414	391
ENSMUSG00000006526	1587	1363	1454
ENSMUSG00000006527	847	1031	1105
ENSMUSG00000006529	4	2	0
ENSMUSG00000006538	10	16	15
ENSMUSG00000006542	19	14	22
ENSMUSG00000006546	2	0	0
ENSMUSG00000006567	6	10	0
ENSMUSG00000006570	0	0	0
ENSMUSG00000006574	47	40	482
ENSMUSG00000006575	91	1388	185
ENSMUSG00000006576	1309	1367	1619
ENSMUSG00000006585	102	150	188
ENSMUSG00000006586	650	660	643
ENSMUSG00000006587	2	2	2
ENSMUSG00000006589	641	1170	818
ENSMUSG00000006599	980	1329	1218
ENSMUSG00000006611	934	974	1100
ENSMUSG00000006638	11	7	6
ENSMUSG00000006641	170	233	188
ENSMUSG00000006642	18	14	32
ENSMUSG00000006649	3	2	2
ENSMUSG00000006651	338	1725	537
ENSMUSG00000006673	2249	3034	2676
ENSMUSG00000006675	292	572	377
ENSMUSG00000006676	2694	3682	3661
ENSMUSG00000006678	838	848	911
ENSMUSG00000006699	7308	10983	8558
ENSMUSG00000006705	486	707	623
ENSMUSG00000006711	57	1029	117
ENSMUSG00000006715	87	154	112
ENSMUSG00000006717	329	414	307
ENSMUSG00000006720	34	33	36
ENSMUSG00000006724	4	10	14
ENSMUSG00000006728	1133	1403	1387
ENSMUSG00000006731	381	651	550
ENSMUSG00000006732	284	322	299
ENSMUSG00000006736	798	1139	850
ENSMUSG00000006740	6914	9612	7491
ENSMUSG00000006763	392	453	455
ENSMUSG00000006764	9	3	6
ENSMUSG00000006777	0	16	2
ENSMUSG00000006782	683	1457	712
ENSMUSG00000006784	25	29	29
ENSMUSG00000006800	7084	6562	7825
ENSMUSG00000006818	2054	2824	2218
ENSMUSG00000006850	173	274	201
ENSMUSG00000006906	379	492	435
ENSMUSG00000006920	1669	2283	1927
ENSMUSG00000006930	96	628	140
ENSMUSG00000006931	816	712	771
ENSMUSG00000006932	15413	15580	15983
ENSMUSG00000006941	555	1001	659
ENSMUSG00000006948	0	0	0
ENSMUSG00000006958	454	436	541
ENSMUSG00000006998	4759	7781	5361
ENSMUSG00000007021	144	1976	180
ENSMUSG00000007029	1312	1838	1811
ENSMUSG00000007030	35	283	57
ENSMUSG00000007033	15	18	25
ENSMUSG00000007034	1	0	1
ENSMUSG00000007035	19	43	75
ENSMUSG00000007036	1206	1648	1392
ENSMUSG00000007038	765	1102	1208
ENSMUSG00000007039	720	794	871
ENSMUSG00000007041	2700	3730	3048
ENSMUSG00000007050	116	174	159
ENSMUSG00000007080	157	254	269
ENSMUSG00000007097	5997	6294	6138
ENSMUSG00000007107	3	11	3
ENSMUSG00000007122	203	147	123
ENSMUSG00000007207	530	751	602
ENSMUSG00000007209	0	0	0
ENSMUSG00000007216	107	169	154
ENSMUSG00000007279	8	11	9
ENSMUSG00000007338	431	718	457
ENSMUSG00000007379	147	176	156
ENSMUSG00000007411	2168	2723	2613
ENSMUSG00000007415	1039	1814	1190
ENSMUSG00000007440	6	23	15
ENSMUSG00000007457	0	0	0
ENSMUSG00000007458	3582	5265	4460
ENSMUSG00000007476	579	921	717
ENSMUSG00000007480	10	10	5
ENSMUSG00000007564	3118	6149	3784
ENSMUSG00000007570	463	494	632
ENSMUSG00000007589	382	509	472
ENSMUSG00000007591	15	29	41
ENSMUSG00000007594	18	48	39
ENSMUSG00000007603	539	769	701
ENSMUSG00000007610	563	660	738
ENSMUSG00000007613	6248	8869	7033
ENSMUSG00000007617	468	849	675
ENSMUSG00000007646	24	68	48
ENSMUSG00000007653	10	34	10
ENSMUSG00000007655	10602	7501	8503
ENSMUSG00000007656	1462	1962	1465
ENSMUSG00000007659	1322	1984	1933
ENSMUSG00000007670	1861	2317	2324
ENSMUSG00000007682	3806	2725	3143
ENSMUSG00000007721	539	810	579
ENSMUSG00000007739	2396	3759	2659
ENSMUSG00000007777	188	284	153
ENSMUSG00000007783	618	989	864
ENSMUSG00000007805	58	24	78
ENSMUSG00000007812	1342	1871	1672
ENSMUSG00000007815	5202	6371	5709
ENSMUSG00000007817	3235	4355	5161
ENSMUSG00000007827	411	654	542
ENSMUSG00000007833	533	664	737
ENSMUSG00000007836	1534	2050	1973
ENSMUSG00000007837	142	164	178
ENSMUSG00000007850	7133	8561	8184
ENSMUSG00000007867	442	431	416
ENSMUSG00000007872	2297	2701	2767
ENSMUSG00000007877	404	744	1320
ENSMUSG00000007880	2783	3900	3792
ENSMUSG00000007888	644	929	879
ENSMUSG00000007891	30823	39295	46790
ENSMUSG00000007892	9242	11070	10730
ENSMUSG00000007907	0	1	0
ENSMUSG00000007908	7	118	17
ENSMUSG00000007944	14	72	14
ENSMUSG00000007946	22	484	45
ENSMUSG00000007950	539	1048	692
ENSMUSG00000007987	300	500	368
ENSMUSG00000007989	284	1020	338
ENSMUSG00000008028	6	6	2
ENSMUSG00000008035	804	1434	845
ENSMUSG00000008036	948	1969	1150
ENSMUSG00000008090	1162	1110	1323
ENSMUSG00000008129	7	24	13
ENSMUSG00000008136	177	190	219
ENSMUSG00000008140	1361	1930	1625
ENSMUSG00000008153	265	352	285
ENSMUSG00000008167	189	328	257
ENSMUSG00000008193	30	38	38
ENSMUSG00000008200	1415	2097	2096
ENSMUSG00000008206	1098	2152	1234
ENSMUSG00000008226	328	630	327
ENSMUSG00000008301	674	848	692
ENSMUSG00000008305	1326	1862	1627
ENSMUSG00000008307	174	236	203
ENSMUSG00000008318	146	168	148
ENSMUSG00000008333	621	828	606
ENSMUSG00000008348	2599	3552	3113
ENSMUSG00000008373	688	970	806
ENSMUSG00000008384	369	490	516
ENSMUSG00000008393	1580	2057	1673
ENSMUSG00000008398	1146	1409	1407
ENSMUSG00000008429	995	1276	1173
ENSMUSG00000008435	493	737	698
ENSMUSG00000008438	11	14	20
ENSMUSG00000008450	249	368	280
ENSMUSG00000008461	0	0	0
ENSMUSG00000008475	2920	4675	3868
ENSMUSG00000008482	0	2	0
ENSMUSG00000008489	152	2648	259
ENSMUSG00000008496	283	564	434
ENSMUSG00000008540	2153	1838	2283
ENSMUSG00000008575	13140	10990	13473
ENSMUSG00000008590	118	1871	127
ENSMUSG00000008601	0	6	2
ENSMUSG00000008604	817	1230	1036
ENSMUSG00000008658	55	662	114
ENSMUSG00000008668	5517	6195	6618
ENSMUSG00000008682	7413	9055	8568
ENSMUSG00000008683	4109	5130	4357
ENSMUSG00000008690	1466	2050	1828
ENSMUSG00000008730	5868	7043	6406
ENSMUSG00000008734	996	970	1101
ENSMUSG00000008763	3471	4625	3908
ENSMUSG00000008789	0	0	0
ENSMUSG00000008813	0	0	0
ENSMUSG00000008822	107	168	154
ENSMUSG00000008843	0	2	2
ENSMUSG00000008845	1764	1074	2254
ENSMUSG00000008855	2245	2670	3035
ENSMUSG00000008859	866	1412	864
ENSMUSG00000008874	12	18	12
ENSMUSG00000008892	1575	2917	1521
ENSMUSG00000008932	33	16	28
ENSMUSG00000008958	465	576	611
ENSMUSG00000008976	1382	1584	1383
ENSMUSG00000008999	28	29	33
ENSMUSG00000009013	2298	4377	2359
ENSMUSG00000009030	1021	1490	1056
ENSMUSG00000009035	1655	2127	2148
ENSMUSG00000009047	0	0	0
ENSMUSG00000009070	1	2	0
ENSMUSG00000009073	2061	2652	2597
ENSMUSG00000009075	10	12	20
ENSMUSG00000009076	152	221	201
ENSMUSG00000009079	4058	4583	4617
ENSMUSG00000009090	1994	3108	2479
ENSMUSG00000009092	30	41	43
ENSMUSG00000009093	0	0	0
ENSMUSG00000009097	82	89	86
ENSMUSG00000009108	35	43	35
ENSMUSG00000009112	807	1305	1151
ENSMUSG00000009114	4	0	0
ENSMUSG00000009115	0	2	0
ENSMUSG00000009145	75	239	110
ENSMUSG00000009185	950	1273	887
ENSMUSG00000009207	751	1769	780
ENSMUSG00000009210	10	18	20
ENSMUSG00000009214	0	0	2
ENSMUSG00000009216	0	12	16
ENSMUSG00000009246	15	6	20
ENSMUSG00000009248	2	0	2
ENSMUSG00000009281	1794	1414	1700
ENSMUSG00000009291	4223	4474	4189
ENSMUSG00000009292	212	772	319
ENSMUSG00000009293	795	1109	951
ENSMUSG00000009350	4	2	4
ENSMUSG00000009356	2	2	0
ENSMUSG00000009376	575	640	888
ENSMUSG00000009378	22	11	29
ENSMUSG00000009394	411	6687	595
ENSMUSG00000009406	470	527	489
ENSMUSG00000009418	5651	7375	7339
ENSMUSG00000009470	5940	8062	6702
ENSMUSG00000009471	0	0	0
ENSMUSG00000009487	0	0	1
ENSMUSG00000009535	959	1538	1027
ENSMUSG00000009545	47	57	135
ENSMUSG00000009549	1042	1901	1267
ENSMUSG00000009551	13	32	26
ENSMUSG00000009555	807	1321	1286
ENSMUSG00000009563	364	513	401
ENSMUSG00000009566	271	343	314
ENSMUSG00000009569	2207	2512	2937
ENSMUSG00000009575	5151	6331	4871
ENSMUSG00000009580	0	0	0
ENSMUSG00000009585	877	1438	1158
ENSMUSG00000009588	4	3	1
ENSMUSG00000009596	0	3	0
ENSMUSG00000009614	947	1046	1122
ENSMUSG00000009621	1247	2272	1789
ENSMUSG00000009628	4	20	16
ENSMUSG00000009630	796	1320	885
ENSMUSG00000009633	460	249	555
ENSMUSG00000009640	332	442	340
ENSMUSG00000009646	4	0	0
ENSMUSG00000009647	640	753	790
ENSMUSG00000009654	47	23	23
ENSMUSG00000009670	0	3	12
ENSMUSG00000009681	2863	3732	3787
ENSMUSG00000009687	2904	3950	3463
ENSMUSG00000009731	87	267	137
ENSMUSG00000009733	485	715	639
ENSMUSG00000009734	2	0	0
ENSMUSG00000009739	665	778	960
ENSMUSG00000009741	2271	2404	2743
ENSMUSG00000009772	269	489	452
ENSMUSG00000009828	1118	1356	1296
ENSMUSG00000009863	1705	2193	1964
ENSMUSG00000009876	106	73	82
ENSMUSG00000009894	763	2104	751
ENSMUSG00000009900	2	0	0
ENSMUSG00000009905	1405	1831	1392
ENSMUSG00000009907	2191	3535	2484
ENSMUSG00000009927	4354	5582	4889
ENSMUSG00000009941	2	14	8
ENSMUSG00000009995	1032	1179	1204
ENSMUSG00000010021	55	45	29
ENSMUSG00000010025	1296	1792	1418
ENSMUSG00000010044	6	9	10
ENSMUSG00000010045	684	884	712
ENSMUSG00000010047	434	553	538
ENSMUSG00000010048	338	434	505
ENSMUSG00000010051	589	471	532
ENSMUSG00000010054	308	604	274
ENSMUSG00000010057	231	372	284
ENSMUSG00000010064	26	9	26
ENSMUSG00000010066	57	333	56
ENSMUSG00000010067	410	491	527
ENSMUSG00000010080	9	9	20
ENSMUSG00000010086	44	365	74
ENSMUSG00000010095	1429	2287	1974
ENSMUSG00000010097	2238	2879	2798
ENSMUSG00000010110	1752	2063	2104
ENSMUSG00000010122	29	34	44
ENSMUSG00000010136	3	0	4
ENSMUSG00000010142	134	225	192
ENSMUSG00000010154	37	315	41
ENSMUSG00000010175	76	279	72
ENSMUSG00000010205	0	0	0
ENSMUSG00000010277	8007	11379	10363
ENSMUSG00000010290	812	1032	734
ENSMUSG00000010307	369	521	531
ENSMUSG00000010311	270	149	289
ENSMUSG00000010342	8	20	15
ENSMUSG00000010358	483	789	639
ENSMUSG00000010362	256	222	251
ENSMUSG00000010376	1017	1907	1176
ENSMUSG00000010392	1075	1389	1224
ENSMUSG00000010406	461	580	571
ENSMUSG00000010435	1	0	1
ENSMUSG00000010453	1808	2750	2324
ENSMUSG00000010461	298	364	350
ENSMUSG00000010476	260	314	384
ENSMUSG00000010492	116	147	140
ENSMUSG00000010505	35	488	48
ENSMUSG00000010517	1208	1808	1363
ENSMUSG00000010529	4	6	2
ENSMUSG00000010538	18	16	22
ENSMUSG00000010554	843	1072	815
ENSMUSG00000010592	0	6	0
ENSMUSG00000010601	2	6	8
ENSMUSG00000010607	228	208	217
ENSMUSG00000010608	3812	5033	4499
ENSMUSG00000010609	839	1104	991
ENSMUSG00000010651	115	43	132
ENSMUSG00000010660	1218	1154	1389
ENSMUSG00000010663	1810	3501	2284
ENSMUSG00000010721	606	783	569
ENSMUSG00000010751	114	153	175
ENSMUSG00000010755	733	1039	1018
ENSMUSG00000010760	0	0	2
ENSMUSG00000010796	0	0	0
ENSMUSG00000010797	47	24	59
ENSMUSG00000010803	22	53	20
ENSMUSG00000010825	3	68	15
ENSMUSG00000010830	777	683	650
ENSMUSG00000010841	9	17	14
ENSMUSG00000010911	262	320	294
ENSMUSG00000010914	508	678	562
ENSMUSG00000010936	827	1116	1169
ENSMUSG00000011008	250	392	415
ENSMUSG00000011034	2	0	0
ENSMUSG00000011052	0	0	0
ENSMUSG00000011096	549	696	578
ENSMUSG00000011114	1315	1394	1300
ENSMUSG00000011118	7	30	4
ENSMUSG00000011148	269	313	297
ENSMUSG00000011154	8	2	6
ENSMUSG00000011158	1222	1622	1750
ENSMUSG00000011171	240	158	215
ENSMUSG00000011179	1555	2109	1739
ENSMUSG00000011254	183	267	190
ENSMUSG00000011256	1749	3215	1858
ENSMUSG00000011257	1137	1221	1264
ENSMUSG00000011263	62	100	98
ENSMUSG00000011267	9	30	16
ENSMUSG00000011305	235	138	264
ENSMUSG00000011306	659	833	829
ENSMUSG00000011349	0	0	0
ENSMUSG00000011350	0	0	0
ENSMUSG00000011382	624	521	731
ENSMUSG00000011427	570	815	733
ENSMUSG00000011463	28	2	18
ENSMUSG00000011486	0	0	0
ENSMUSG00000011589	18	247	26
ENSMUSG00000011632	0	0	0
ENSMUSG00000011658	319	278	343
ENSMUSG00000011751	17	187	38
ENSMUSG00000011752	785	1589	1088
ENSMUSG00000011831	2228	4046	2260
ENSMUSG00000011832	642	1062	699
ENSMUSG00000011837	252	310	259
ENSMUSG00000011877	1299	1798	1703
ENSMUSG00000011884	1071	1408	1582
ENSMUSG00000011958	4134	4445	4169
ENSMUSG00000011960	1508	2215	1592
ENSMUSG00000012017	1630	2019	2403
ENSMUSG00000012042	2	0	1
ENSMUSG00000012076	587	830	595
ENSMUSG00000012114	1261	1554	1664
ENSMUSG00000012117	776	1137	892
ENSMUSG00000012123	7	26	15
ENSMUSG00000012126	64	104	95
ENSMUSG00000012187	21	5	15
ENSMUSG00000012211	7	15	5
ENSMUSG00000012282	0	2	0
ENSMUSG00000012296	390	524	615
ENSMUSG00000012350	29	22	26
ENSMUSG00000012396	0	0	0
ENSMUSG00000012405	2479	3219	2659
ENSMUSG00000012422	1774	2249	1783
ENSMUSG00000012428	3280	3488	4069
ENSMUSG00000012429	432	512	504
ENSMUSG00000012443	276	334	355
ENSMUSG00000012483	93	154	119
ENSMUSG00000012519	308	488	438
ENSMUSG00000012520	70	778	66
ENSMUSG00000012535	1952	2569	2257
ENSMUSG00000012609	626	901	738
ENSMUSG00000012640	1016	1476	1286
ENSMUSG00000012705	243	73	160
ENSMUSG00000012777	13	20	7
ENSMUSG00000012819	179	252	267
ENSMUSG00000012848	5776	6432	6488
ENSMUSG00000012889	52	105	72
ENSMUSG00000013033	2162	3498	3160
ENSMUSG00000013076	4527	4384	4780
ENSMUSG00000013083	0	0	0
ENSMUSG00000013089	590	1366	700
ENSMUSG00000013091	12	5	6
ENSMUSG00000013150	159	372	240
ENSMUSG00000013155	54	77	60
ENSMUSG00000013158	4	2	3
ENSMUSG00000013160	1438	3077	1958
ENSMUSG00000013236	8429	11001	11798
ENSMUSG00000013275	1205	1639	1408
ENSMUSG00000013338	0	0	2
ENSMUSG00000013353	2	0	2
ENSMUSG00000013367	85	114	111
ENSMUSG00000013415	0	4	2
ENSMUSG00000013418	15	18	13
ENSMUSG00000013419	1457	1530	1681
ENSMUSG00000013465	1264	1736	1518
ENSMUSG00000013483	27	34	50
ENSMUSG00000013495	471	610	507
ENSMUSG00000013523	33	31	14
ENSMUSG00000013539	485	909	615
ENSMUSG00000013562	2	4	4
ENSMUSG00000013584	122	198	287
ENSMUSG00000013593	2496	2975	2585
ENSMUSG00000013611	2	28	4
ENSMUSG00000013622	1057	1093	1068
ENSMUSG00000013629	1384	1350	1562
ENSMUSG00000013643	0	0	0
ENSMUSG00000013646	610	991	833
ENSMUSG00000013653	0	0	0
ENSMUSG00000013662	1601	2631	1625
ENSMUSG00000013663	4967	7524	5698
ENSMUSG00000013668	1	0	0
ENSMUSG00000013698	3943	6879	4619
ENSMUSG00000013701	543	688	596
ENSMUSG00000013707	375	372	416
ENSMUSG00000013736	808	1147	822
ENSMUSG00000013766	2	4	4
ENSMUSG00000013787	2521	3138	3513
ENSMUSG00000013822	466	589	497
ENSMUSG00000013833	538	810	716
ENSMUSG00000013846	2048	2550	2903
ENSMUSG00000013858	1262	1731	1673
ENSMUSG00000013878	500	645	514
ENSMUSG00000013921	776	1635	1088
ENSMUSG00000013928	6	7	8
ENSMUSG00000013936	12	4	8
ENSMUSG00000013973	192	273	221
ENSMUSG00000013974	43	102	29
ENSMUSG00000013997	447	522	483
ENSMUSG00000014030	22	10	75
ENSMUSG00000014039	542	804	705
ENSMUSG00000014074	778	1156	870
ENSMUSG00000014075	168	250	237
ENSMUSG00000014077	2924	5049	2961
ENSMUSG00000014104	0	0	0
ENSMUSG00000014158	343	311	441
ENSMUSG00000014164	130	224	195
ENSMUSG00000014177	684	857	694
ENSMUSG00000014195	1452	2208	1739
ENSMUSG00000014198	44	49	35
ENSMUSG00000014226	758	1954	868
ENSMUSG00000014232	235	321	244
ENSMUSG00000014243	93	93	109
ENSMUSG00000014245	89	100	100
ENSMUSG00000014294	1018	1177	1115
ENSMUSG00000014301	357	406	370
ENSMUSG00000014303	1351	1382	1552
ENSMUSG00000014313	2111	2815	2155
ENSMUSG00000014329	2473	2299	3036
ENSMUSG00000014349	1961	3150	2321
ENSMUSG00000014351	0	0	0
ENSMUSG00000014353	2546	3199	2896
ENSMUSG00000014355	5108	5659	5273
ENSMUSG00000014361	2898	3289	4009
ENSMUSG00000014402	797	1246	832
ENSMUSG00000014418	1242	1641	1508
ENSMUSG00000014426	1350	1731	1590
ENSMUSG00000014444	3110	4056	4891
ENSMUSG00000014453	55	47	79
ENSMUSG00000014470	448	508	539
ENSMUSG00000014496	2707	3778	3373
ENSMUSG00000014498	1645	2642	2373
ENSMUSG00000014503	85	112	106
ENSMUSG00000014504	526	783	573
ENSMUSG00000014529	2	2	1
ENSMUSG00000014542	0	2	0
ENSMUSG00000014543	19	35	41
ENSMUSG00000014547	1887	2447	2156
ENSMUSG00000014550	1361	1620	1258
ENSMUSG00000014551	364	657	380
ENSMUSG00000014554	440	493	465
ENSMUSG00000014592	447	1375	538
ENSMUSG00000014599	2599	3253	3453
ENSMUSG00000014601	925	1241	1100
ENSMUSG00000014602	2331	14439	3358
ENSMUSG00000014603	0	0	0
ENSMUSG00000014606	997	1495	1128
ENSMUSG00000014609	3	5	4
ENSMUSG00000014633	123	209	164
ENSMUSG00000014668	1045	1415	1113
ENSMUSG00000014686	20	32	32
ENSMUSG00000014704	105	116	106
ENSMUSG00000014725	5	4	6
ENSMUSG00000014747	14	26	27
ENSMUSG00000014748	1286	1754	1534
ENSMUSG00000014763	1083	1560	1303
ENSMUSG00000014767	611	729	671
ENSMUSG00000014769	1819	2757	1800
ENSMUSG00000014771	0	0	0
ENSMUSG00000014773	252	228	330
ENSMUSG00000014776	192	665	339
ENSMUSG00000014778	693	980	1027
ENSMUSG00000014782	4	29	14
ENSMUSG00000014786	60	190	140
ENSMUSG00000014791	227	288	308
ENSMUSG00000014813	77	89	54
ENSMUSG00000014837	34	162	68
ENSMUSG00000014846	1638	7904	1383
ENSMUSG00000014850	442	546	480
ENSMUSG00000014852	4	0	4
ENSMUSG00000014856	459	643	502
ENSMUSG00000014859	495	600	752
ENSMUSG00000014867	4977	6259	5568
ENSMUSG00000014873	344	502	466
ENSMUSG00000014905	742	975	658
ENSMUSG00000014907	269	318	288
ENSMUSG00000014932	669	834	663
ENSMUSG00000014956	7665	7872	6812
ENSMUSG00000014959	1652	2223	1823
ENSMUSG00000014980	232	323	267
ENSMUSG00000015001	6	8	9
ENSMUSG00000015002	2978	5635	3294
ENSMUSG00000015013	448	589	519
ENSMUSG00000015016	322	399	423
ENSMUSG00000015023	575	624	715
ENSMUSG00000015027	659	751	924
ENSMUSG00000015053	277	1038	385
ENSMUSG00000015083	34	42	26
ENSMUSG00000015085	983	696	936
ENSMUSG00000015087	1380	2024	1928
ENSMUSG00000015090	12	14	17
ENSMUSG00000015092	1165	1628	1439
ENSMUSG00000015093	57	61	38
ENSMUSG00000015094	1575	2054	1886
ENSMUSG00000015095	785	1078	1132
ENSMUSG00000015112	181	258	276
ENSMUSG00000015120	1631	2050	1909
ENSMUSG00000015126	169	335	234
ENSMUSG00000015127	309	453	398
ENSMUSG00000015133	2318	3182	3234
ENSMUSG00000015134	340	264	401
ENSMUSG00000015143	14636	14680	16133
ENSMUSG00000015149	1111	1580	1528
ENSMUSG00000015165	3673	4526	4576
ENSMUSG00000015176	804	1135	1025
ENSMUSG00000015189	1134	1750	1123
ENSMUSG00000015202	662	783	844
ENSMUSG00000015214	1015	1129	1168
ENSMUSG00000015217	80	299	102
ENSMUSG00000015222	576	6237	756
ENSMUSG00000015224	255	543	148
ENSMUSG00000015242	0	0	2
ENSMUSG00000015243	32275	42961	47681
ENSMUSG00000015247	347	550	415
ENSMUSG00000015289	220	255	246
ENSMUSG00000015290	402	708	544
ENSMUSG00000015291	2069	4606	2636
ENSMUSG00000015305	4706	5124	5519
ENSMUSG00000015312	440	684	562
ENSMUSG00000015314	53	96	83
ENSMUSG00000015316	10	29	41
ENSMUSG00000015335	106	185	147
ENSMUSG00000015337	57	46	51
ENSMUSG00000015340	4523	7718	6080
ENSMUSG00000015341	927	1435	1195
ENSMUSG00000015342	556	611	436
ENSMUSG00000015354	2141	1287	1847
ENSMUSG00000015355	597	851	888
ENSMUSG00000015357	1049	1226	1099
ENSMUSG00000015363	711	1069	971
ENSMUSG00000015365	0	7	4
ENSMUSG00000015377	181	263	271
ENSMUSG00000015396	581	1083	815
ENSMUSG00000015401	0	4	0
ENSMUSG00000015405	10	20	6
ENSMUSG00000015437	6	24	14
ENSMUSG00000015441	0	0	0
ENSMUSG00000015443	0	1	0
ENSMUSG00000015451	209	262	239
ENSMUSG00000015452	32	49	54
ENSMUSG00000015461	743	1106	935
ENSMUSG00000015467	58	148	51
ENSMUSG00000015468	541	706	976
ENSMUSG00000015474	234	312	290
ENSMUSG00000015476	47	72	77
ENSMUSG00000015478	137	225	164
ENSMUSG00000015484	64	1068	65
ENSMUSG00000015488	703	915	891
ENSMUSG00000015501	2979	3763	3908
ENSMUSG00000015519	0	0	0
ENSMUSG00000015522	1778	2188	2307
ENSMUSG00000015533	432	758	574
ENSMUSG00000015536	904	1578	1111
ENSMUSG00000015542	276	379	323
ENSMUSG00000015568	12611	13678	22141
ENSMUSG00000015575	1381	1846	1823
ENSMUSG00000015579	0	0	2
ENSMUSG00000015597	922	1550	1350
ENSMUSG00000015599	44	565	94
ENSMUSG00000015605	1080	1244	1253
ENSMUSG00000015619	80	193	77
ENSMUSG00000015627	2	3	10
ENSMUSG00000015647	8849	7219	10635
ENSMUSG00000015652	22	38	29
ENSMUSG00000015653	476	698	563
ENSMUSG00000015656	17302	36753	20105
ENSMUSG00000015659	424	528	529
ENSMUSG00000015665	2	8	10
ENSMUSG00000015668	298	558	349
ENSMUSG00000015671	1401	2409	1454
ENSMUSG00000015672	294	495	396
ENSMUSG00000015697	1229	1614	1525
ENSMUSG00000015702	59	82	118
ENSMUSG00000015709	228	432	260
ENSMUSG00000015711	453	589	492
ENSMUSG00000015714	2342	2900	2731
ENSMUSG00000015721	6	8	6
ENSMUSG00000015733	4166	6728	4934
ENSMUSG00000015745	1348	1899	1881
ENSMUSG00000015747	442	697	415
ENSMUSG00000015748	532	659	724
ENSMUSG00000015749	1300	1590	1361
ENSMUSG00000015750	655	815	738
ENSMUSG00000015755	1846	2675	2328
ENSMUSG00000015757	1209	1465	1263
ENSMUSG00000015759	895	1363	939
ENSMUSG00000015766	1367	1423	1867
ENSMUSG00000015776	1040	1235	1124
ENSMUSG00000015787	0	0	0
ENSMUSG00000015790	531	804	643
ENSMUSG00000015804	887	1093	840
ENSMUSG00000015806	371	667	431
ENSMUSG00000015812	18	39	30
ENSMUSG00000015829	92	1011	106
ENSMUSG00000015837	7147	10883	8442
ENSMUSG00000015839	2461	3435	3176
ENSMUSG00000015843	65	159	67
ENSMUSG00000015846	2448	2929	3104
ENSMUSG00000015850	1081	1061	1301
ENSMUSG00000015852	2493	2480	2537
ENSMUSG00000015854	13454	10983	19318
ENSMUSG00000015869	818	1001	956
ENSMUSG00000015879	69	48	70
ENSMUSG00000015880	86	203	166
ENSMUSG00000015882	742	1038	906
ENSMUSG00000015889	1147	1363	1277
ENSMUSG00000015890	0	2	4
ENSMUSG00000015932	12701	12713	9748
ENSMUSG00000015937	1167	1621	1499
ENSMUSG00000015942	191	413	314
ENSMUSG00000015943	108	130	88
ENSMUSG00000015944	909	1432	1218
ENSMUSG00000015947	1000	1555	1009
ENSMUSG00000015950	960	1900	1397
ENSMUSG00000015957	72	96	85
ENSMUSG00000015961	1707	2504	1932
ENSMUSG00000015962	3	5	2
ENSMUSG00000015966	95	109	71
ENSMUSG00000015968	1259	1398	1350
ENSMUSG00000015970	299	237	271
ENSMUSG00000015971	1031	1358	1166
ENSMUSG00000015980	125	231	255
ENSMUSG00000015981	36	280	56
ENSMUSG00000015994	1152	1514	1105
ENSMUSG00000016018	1355	2108	1656
ENSMUSG00000016024	1010	1352	1254
ENSMUSG00000016028	318	394	386
ENSMUSG00000016087	929	993	1178
ENSMUSG00000016128	1675	2235	1684
ENSMUSG00000016150	35	720	66
ENSMUSG00000016179	8	34	11
ENSMUSG00000016181	378	487	485
ENSMUSG00000016194	493	287	566
ENSMUSG00000016200	35	328	39
ENSMUSG00000016206	418	804	639
ENSMUSG00000016239	273	331	381
ENSMUSG00000016252	1570	1806	1740
ENSMUSG00000016253	595	1382	685
ENSMUSG00000016255	37	139	224
ENSMUSG00000016256	9803	12318	13705
ENSMUSG00000016257	621	1084	746
ENSMUSG00000016262	489	523	597
ENSMUSG00000016283	50	142	89
ENSMUSG00000016308	338	606	467
ENSMUSG00000016319	2736	3647	2908
ENSMUSG00000016327	4	2	5
ENSMUSG00000016344	250	348	283
ENSMUSG00000016346	124	2195	224
ENSMUSG00000016349	304	3774	482
ENSMUSG00000016356	256	371	274
ENSMUSG00000016382	16398	16149	13606
ENSMUSG00000016386	61	95	67
ENSMUSG00000016409	497	734	537
ENSMUSG00000016427	779	1060	894
ENSMUSG00000016458	8	6	11
ENSMUSG00000016477	275	589	478
ENSMUSG00000016481	2332	2778	2287
ENSMUSG00000016487	3650	3941	4106
ENSMUSG00000016493	347	329	273
ENSMUSG00000016494	5296	3738	5275
ENSMUSG00000016495	682	824	843
ENSMUSG00000016496	542	1135	689
ENSMUSG00000016498	15	67	15
ENSMUSG00000016503	122	163	182
ENSMUSG00000016510	196	260	272
ENSMUSG00000016520	663	566	662
ENSMUSG00000016524	0	0	0
ENSMUSG00000016526	14	28	6
ENSMUSG00000016528	2840	3354	3505
ENSMUSG00000016529	8	13	16
ENSMUSG00000016534	10932	12937	12093
ENSMUSG00000016541	1560	3516	1845
ENSMUSG00000016552	115	138	135
ENSMUSG00000016554	966	1283	1042
ENSMUSG00000016559	6206	7561	6448
ENSMUSG00000016619	888	1400	1277
ENSMUSG00000016624	19	67	66
ENSMUSG00000016626	0	0	0
ENSMUSG00000016637	249	316	253
ENSMUSG00000016664	3315	3900	3570
ENSMUSG00000016756	1331	1181	1430
ENSMUSG00000016757	488	790	642
ENSMUSG00000016758	175	105	146
ENSMUSG00000016763	276	2176	438
ENSMUSG00000016831	1407	1968	1652
ENSMUSG00000016833	181	265	169
ENSMUSG00000016918	19950	21974	21313
ENSMUSG00000016921	3123	3990	3486
ENSMUSG00000016933	2312	2770	3076
ENSMUSG00000016940	507	848	649
ENSMUSG00000016942	55	39	44
ENSMUSG00000016946	381	583	461
ENSMUSG00000016982	0	2	0
ENSMUSG00000016984	300	396	297
ENSMUSG00000016995	37	254	78
ENSMUSG00000016998	0	0	0
ENSMUSG00000017000	0	0	0
ENSMUSG00000017002	12	75	45
ENSMUSG00000017003	0	0	0
ENSMUSG00000017004	0	0	0
ENSMUSG00000017007	10	16	2
ENSMUSG00000017009	5111	5538	4746
ENSMUSG00000017049	0	0	2
ENSMUSG00000017057	2440	2900	2596
ENSMUSG00000017064	0	0	0
ENSMUSG00000017119	3938	5492	4599
ENSMUSG00000017132	1459	2354	1961
ENSMUSG00000017144	1579	2321	1616
ENSMUSG00000017146	140	231	136
ENSMUSG00000017165	0	0	0
ENSMUSG00000017167	422	520	519
ENSMUSG00000017176	383	494	449
ENSMUSG00000017188	424	758	449
ENSMUSG00000017195	0	2	2
ENSMUSG00000017204	0	6	0
ENSMUSG00000017210	889	1213	1116
ENSMUSG00000017211	0	1	0
ENSMUSG00000017221	1389	1913	1697
ENSMUSG00000017264	1017	1227	1226
ENSMUSG00000017286	760	946	762
ENSMUSG00000017288	643	1129	953
ENSMUSG00000017291	8846	11782	9420
ENSMUSG00000017299	284	402	340
ENSMUSG00000017300	0	0	1
ENSMUSG00000017307	152	229	203
ENSMUSG00000017309	168	207	217
ENSMUSG00000017310	0	0	0
ENSMUSG00000017311	0	0	2
ENSMUSG00000017314	192	543	311
ENSMUSG00000017316	0	0	0
ENSMUSG00000017344	42	66	48
ENSMUSG00000017376	609	1054	830
ENSMUSG00000017386	222	268	273
ENSMUSG00000017390	122	1363	104
ENSMUSG00000017400	223	412	485
ENSMUSG00000017404	4272	5454	5298
ENSMUSG00000017405	250	310	277
ENSMUSG00000017412	109	418	137
ENSMUSG00000017417	252	298	346
ENSMUSG00000017418	1301	1783	1405
ENSMUSG00000017421	3564	4458	3940
ENSMUSG00000017428	1531	1974	1759
ENSMUSG00000017446	1041	1200	1285
ENSMUSG00000017453	130	138	157
ENSMUSG00000017466	22489	26118	28559
ENSMUSG00000017478	1470	1697	1869
ENSMUSG00000017485	4945	5854	4932
ENSMUSG00000017491	139	175	127
ENSMUSG00000017493	21063	16947	23789
ENSMUSG00000017499	65	76	98
ENSMUSG00000017548	1054	1641	1350
ENSMUSG00000017550	255	389	340
ENSMUSG00000017561	745	1174	1076
ENSMUSG00000017588	0	0	0
ENSMUSG00000017607	118	126	105
ENSMUSG00000017615	1504	1830	1726
ENSMUSG00000017631	3171	5873	4357
ENSMUSG00000017639	238	1943	346
ENSMUSG00000017652	189	354	201
ENSMUSG00000017664	581	940	776
ENSMUSG00000017667	553	894	591
ENSMUSG00000017670	1529	2581	1810
ENSMUSG00000017677	1975	2502	2336
ENSMUSG00000017679	1325	1954	1584
ENSMUSG00000017686	1424	2078	1611
ENSMUSG00000017688	2	2	0
ENSMUSG00000017692	209	209	218
ENSMUSG00000017697	94	129	129
ENSMUSG00000017707	12810	14097	13149
ENSMUSG00000017713	160	172	213
ENSMUSG00000017715	929	1924	1176
ENSMUSG00000017716	101	96	82
ENSMUSG00000017718	68	45	92
ENSMUSG00000017720	15	25	11
ENSMUSG00000017721	690	953	831
ENSMUSG00000017723	24	17	24
ENSMUSG00000017724	54	90	89
ENSMUSG00000017733	0	0	0
ENSMUSG00000017734	190	215	156
ENSMUSG00000017737	85	81	96
ENSMUSG00000017740	46	54	53
ENSMUSG00000017747	352	439	394
ENSMUSG00000017754	5761	6477	7894
ENSMUSG00000017756	1444	1703	1920
ENSMUSG00000017760	5528	7402	7663
ENSMUSG00000017764	145	225	173
ENSMUSG00000017765	2056	2230	2385
ENSMUSG00000017767	25	28	38
ENSMUSG00000017774	8325	9297	10094
ENSMUSG00000017776	3195	4659	3820
ENSMUSG00000017778	1153	1855	1148
ENSMUSG00000017781	2836	4565	3659
ENSMUSG00000017801	364	570	460
ENSMUSG00000017802	1282	1551	1397
ENSMUSG00000017817	4094	3151	4847
ENSMUSG00000017830	337	511	330
ENSMUSG00000017831	1263	2019	1342
ENSMUSG00000017832	12	14	11
ENSMUSG00000017837	553	708	684
ENSMUSG00000017843	2705	4650	3364
ENSMUSG00000017858	458	533	482
ENSMUSG00000017861	48	47	80
ENSMUSG00000017868	7	2	10
ENSMUSG00000017897	97	102	93
ENSMUSG00000017922	0	0	0
ENSMUSG00000017929	2054	3655	3112
ENSMUSG00000017943	30	438	46
ENSMUSG00000017950	10	2	5
ENSMUSG00000017969	5415	4779	5867
ENSMUSG00000017978	222	190	261
ENSMUSG00000017999	677	792	784
ENSMUSG00000018001	3571	5168	4262
ENSMUSG00000018008	3282	4890	4775
ENSMUSG00000018012	93	266	157
ENSMUSG00000018040	842	1434	1017
ENSMUSG00000018042	6449	6943	6520
ENSMUSG00000018068	900	1165	1020
ENSMUSG00000018076	4039	4909	5069
ENSMUSG00000018102	1060	1717	1337
ENSMUSG00000018126	0	1	0
ENSMUSG00000018143	1290	1348	1381
ENSMUSG00000018160	1929	2689	2423
ENSMUSG00000018166	349	1335	297
ENSMUSG00000018167	563	853	761
ENSMUSG00000018168	80	131	186
ENSMUSG00000018169	240	225	302
ENSMUSG00000018171	3554	5433	4144
ENSMUSG00000018189	301	528	335
ENSMUSG00000018196	639	894	710
ENSMUSG00000018199	2086	2951	2013
ENSMUSG00000018209	1586	2485	1863
ENSMUSG00000018211	0	0	0
ENSMUSG00000018217	3594	6267	3670
ENSMUSG00000018238	12	26	26
ENSMUSG00000018239	52	92	59
ENSMUSG00000018259	0	0	0
ENSMUSG00000018263	26	8	39
ENSMUSG00000018286	1709	2601	1973
ENSMUSG00000018287	550	884	728
ENSMUSG00000018293	5154	6369	5932
ENSMUSG00000018322	756	1099	861
ENSMUSG00000018326	3898	7349	4932
ENSMUSG00000018334	821	1272	1122
ENSMUSG00000018339	1340	1497	1699
ENSMUSG00000018340	7039	8746	7018
ENSMUSG00000018341	51	58	92
ENSMUSG00000018347	322	345	336
ENSMUSG00000018362	566	1013	661
ENSMUSG00000018363	2897	3284	3127
ENSMUSG00000018372	278	370	315
ENSMUSG00000018377	1935	2294	2067
ENSMUSG00000018378	1006	1204	1382
ENSMUSG00000018379	3675	4678	3787
ENSMUSG00000018381	175	235	279
ENSMUSG00000018387	85	117	104
ENSMUSG00000018395	828	2470	1153
ENSMUSG00000018398	2921	4203	3901
ENSMUSG00000018401	1181	2683	1426
ENSMUSG00000018405	200	368	283
ENSMUSG00000018411	363	4313	460
ENSMUSG00000018412	2332	2954	2885
ENSMUSG00000018415	1336	1392	1360
ENSMUSG00000018417	491	1187	821
ENSMUSG00000018425	1146	1360	1141
ENSMUSG00000018427	842	838	897
ENSMUSG00000018428	1426	1122	1380
ENSMUSG00000018433	578	789	633
ENSMUSG00000018442	1083	1491	1297
ENSMUSG00000018446	377	528	455
ENSMUSG00000018449	326	504	424
ENSMUSG00000018451	84	943	78
ENSMUSG00000018459	80	121	74
ENSMUSG00000018470	20	13	21
ENSMUSG00000018474	6014	7275	7334
ENSMUSG00000018476	712	1139	1294
ENSMUSG00000018479	0	0	1
ENSMUSG00000018481	1608	2269	1825
ENSMUSG00000018486	4	4	8
ENSMUSG00000018500	66	126	60
ENSMUSG00000018501	6736	8059	8160
ENSMUSG00000018507	1066	1988	1385
ENSMUSG00000018509	79	122	107
ENSMUSG00000018537	238	283	309
ENSMUSG00000018541	427	640	573
ENSMUSG00000018543	4	4	2
ENSMUSG00000018547	1043	2049	1369
ENSMUSG00000018548	815	2275	1068
ENSMUSG00000018554	19	26	40
ENSMUSG00000018559	741	1081	1157
ENSMUSG00000018565	459	850	555
ENSMUSG00000018566	512	407	619
ENSMUSG00000018567	3427	4686	3951
ENSMUSG00000018569	19	13	24
ENSMUSG00000018570	17	24	22
ENSMUSG00000018572	736	1210	1071
ENSMUSG00000018574	1928	1609	2058
ENSMUSG00000018581	15	31	25
ENSMUSG00000018583	2671	3923	3176
ENSMUSG00000018585	1102	1418	1199
ENSMUSG00000018589	0	0	0
ENSMUSG00000018593	50475	58481	55314
ENSMUSG00000018595	23	24	24
ENSMUSG00000018599	262	350	351
ENSMUSG00000018604	115	564	173
ENSMUSG00000018620	0	0	2
ENSMUSG00000018623	0	0	0
ENSMUSG00000018634	2	1	3
ENSMUSG00000018648	102	98	86
ENSMUSG00000018651	367	383	433
ENSMUSG00000018654	763	1187	1080
ENSMUSG00000018656	24	7	21
ENSMUSG00000018659	238	338	296
ENSMUSG00000018661	785	1107	1004
ENSMUSG00000018666	1058	1283	1102
ENSMUSG00000018669	741	768	846
ENSMUSG00000018672	665	709	764
ENSMUSG00000018677	965	1353	1273
ENSMUSG00000018678	214	288	346
ENSMUSG00000018697	442	666	641
ENSMUSG00000018698	0	0	2
ENSMUSG00000018707	23179	41794	28681
ENSMUSG00000018727	68	83	87
ENSMUSG00000018733	207	221	171
ENSMUSG00000018736	1789	2556	2026
ENSMUSG00000018740	120	151	174
ENSMUSG00000018750	4149	4882	4524
ENSMUSG00000018752	19	45	64
ENSMUSG00000018761	432	588	522
ENSMUSG00000018765	1352	2719	1646
ENSMUSG00000018770	1227	2608	1271
ENSMUSG00000018774	3224	4605	4964
ENSMUSG00000018776	8	7	10
ENSMUSG00000018796	5617	4124	6223
ENSMUSG00000018800	754	1352	641
[truncated: 51,803 more rows]
