# Supplementary material for: Transcriptomics as Precision Medicine to Classify <em>In Vivo</em> Models of Dietary-Induced Atherosclerosis at Cellular and Molecular Levels
Source: Preprints.org preprint supplement (doi:10.20944/preprints201809.0082.v1), 2018-09-05
Supplement: Supplementary file 17 [file Supplemental_Table_4.xlsx]

## Sheet: Rabbit_gene_counts
SRX ID	SRX864779	SRX864780	SRX864781	SRX864782
Sample Designation	NZW_HFHC1	NZW_HFHC2	NZW_HFHC3	NZW_HFHC4
ENSOCUG00000000001	15	2	21	0
ENSOCUG00000000003	3	1	5	6
ENSOCUG00000000004	1275	1432	941	1016
ENSOCUG00000000005	614	348	261	375
ENSOCUG00000000006	579	922	518	538
ENSOCUG00000000007	1850	1767	1261	1288
ENSOCUG00000000008	49	19	20	32
ENSOCUG00000000009	6527	4347	3572	4961
ENSOCUG00000000010	1184	787	664	923
ENSOCUG00000000012	4016	2735	2194	3478
ENSOCUG00000000013	263	142	167	216
ENSOCUG00000000014	559470	384415	337770	355718
ENSOCUG00000000015	1757	1742	1203	929
ENSOCUG00000000016	115	37	72	73
ENSOCUG00000000017	446	722	332	324
ENSOCUG00000000018	1778	1083	1182	1477
ENSOCUG00000000020	1980	1378	1257	2421
ENSOCUG00000000021	4295	4069	3530	4366
ENSOCUG00000000022	837	822	625	601
ENSOCUG00000000023	659	538	513	709
ENSOCUG00000000024	728	496	607	629
ENSOCUG00000000025	1056	1441	608	550
ENSOCUG00000000026	0	0	0	2
ENSOCUG00000000028	1700	2710	1523	1421
ENSOCUG00000000030	1639	1229	1264	1847
ENSOCUG00000000031	138	57	83	99
ENSOCUG00000000032	355	67	113	92
ENSOCUG00000000034	1015	933	748	1023
ENSOCUG00000000036	0	0	0	0
ENSOCUG00000000038	967	758	451	746
ENSOCUG00000000040	408	248	227	274
ENSOCUG00000000041	0	0	0	0
ENSOCUG00000000044	0	0	0	4
ENSOCUG00000000045	192	156	99	298
ENSOCUG00000000046	0	0	0	0
ENSOCUG00000000049	259	152	299	375
ENSOCUG00000000051	2384	1507	1394	2016
ENSOCUG00000000052	0	0	0	0
ENSOCUG00000000054	0	0	0	0
ENSOCUG00000000055	17	42	0	18
ENSOCUG00000000057	7036	4822	2538	3608
ENSOCUG00000000059	468	242	178	155
ENSOCUG00000000060	2116	1589	1408	2300
ENSOCUG00000000061	142	78	150	200
ENSOCUG00000000063	206	195	173	181
ENSOCUG00000000064	2851	3028	2212	2844
ENSOCUG00000000065	352	237	223	150
ENSOCUG00000000066	108	98	84	81
ENSOCUG00000000068	26	30	24	28
ENSOCUG00000000069	17663	19198	12893	11692
ENSOCUG00000000070	34	26	18	22
ENSOCUG00000000071	263	194	236	222
ENSOCUG00000000072	27	32	46	22
ENSOCUG00000000073	3850	4014	2596	3699
ENSOCUG00000000074	2159	1123	1121	1236
ENSOCUG00000000075	4848	3268	3050	4764
ENSOCUG00000000076	7315	5432	3843	2876
ENSOCUG00000000077	187	239	204	75
ENSOCUG00000000078	98	124	108	66
ENSOCUG00000000079	0	0	0	0
ENSOCUG00000000080	1920	898	594	1139
ENSOCUG00000000081	11502	7586	6084	8598
ENSOCUG00000000083	279	294	277	423
ENSOCUG00000000085	1122	818	720	858
ENSOCUG00000000086	2630	2280	1718	1953
ENSOCUG00000000087	23	8	24	8
ENSOCUG00000000089	12	14	22	4
ENSOCUG00000000090	4471	3729	2412	2462
ENSOCUG00000000091	46	49	54	14
ENSOCUG00000000092	17298	19663	16144	14479
ENSOCUG00000000093	230	141	124	141
ENSOCUG00000000094	3692	4203	2510	3108
ENSOCUG00000000095	777	476	355	692
ENSOCUG00000000096	0	0	0	0
ENSOCUG00000000097	1341	1077	790	896
ENSOCUG00000000098	168	102	60	95
ENSOCUG00000000100	1918	1407	1329	1687
ENSOCUG00000000101	56	40	26	25
ENSOCUG00000000102	609	505	497	662
ENSOCUG00000000103	0	0	2	0
ENSOCUG00000000104	1972	1697	1688	2156
ENSOCUG00000000105	2636	2636	1927	2453
ENSOCUG00000000107	238	226	199	158
ENSOCUG00000000108	562	700	418	338
ENSOCUG00000000109	864	497	988	843
ENSOCUG00000000111	81	90	124	112
ENSOCUG00000000114	129	196	76	60
ENSOCUG00000000116	1366	1097	1127	1644
ENSOCUG00000000117	10	2	6	9
ENSOCUG00000000119	65	119	113	105
ENSOCUG00000000120	280	296	160	210
ENSOCUG00000000121	162	104	150	141
ENSOCUG00000000122	601	824	577	374
ENSOCUG00000000123	754	382	251	478
ENSOCUG00000000125	249	301	166	175
ENSOCUG00000000127	1664	1214	1299	1335
ENSOCUG00000000128	608	536	738	490
ENSOCUG00000000129	978	1094	870	529
ENSOCUG00000000131	1012	915	706	674
ENSOCUG00000000133	1926	2001	1667	1654
ENSOCUG00000000134	147	243	169	219
ENSOCUG00000000136	70	58	48	44
ENSOCUG00000000137	8652	6708	5848	6437
ENSOCUG00000000140	5627	3650	3138	5588
ENSOCUG00000000141	1071	834	1020	1093
ENSOCUG00000000142	252	70	103	159
ENSOCUG00000000143	2	12	16	14
ENSOCUG00000000144	52	24	12	32
ENSOCUG00000000145	976	808	962	522
ENSOCUG00000000146	36189	26148	18475	27373
ENSOCUG00000000147	0	0	0	0
ENSOCUG00000000148	219	428	166	444
ENSOCUG00000000149	10645	5436	4063	6176
ENSOCUG00000000151	0	2	6	0
ENSOCUG00000000152	899	656	528	726
ENSOCUG00000000153	893	834	662	530
ENSOCUG00000000154	2	0	3	9
ENSOCUG00000000155	1397	1421	1086	1372
ENSOCUG00000000156	2639	1719	1294	1853
ENSOCUG00000000157	408	313	251	126
ENSOCUG00000000158	5584	6367	4597	3083
ENSOCUG00000000159	551	538	446	489
ENSOCUG00000000161	3179	2620	1990	1799
ENSOCUG00000000162	60	107	72	37
ENSOCUG00000000163	2802	2076	1767	1996
ENSOCUG00000000164	5098	3872	2954	3736
ENSOCUG00000000165	37	57	125	37
ENSOCUG00000000166	260	403	605	463
ENSOCUG00000000167	3368	4385	3152	2653
ENSOCUG00000000169	0	0	2	0
ENSOCUG00000000170	2144	1221	1452	1929
ENSOCUG00000000171	11	33	21	18
ENSOCUG00000000172	2888	1341	1922	2297
ENSOCUG00000000173	5069	3522	4310	4712
ENSOCUG00000000174	1153	882	923	1183
ENSOCUG00000000175	6	0	0	2
ENSOCUG00000000176	0	0	0	0
ENSOCUG00000000178	8	6	22	4
ENSOCUG00000000179	44141	41273	32064	38494
ENSOCUG00000000181	26	24	14	26
ENSOCUG00000000182	58	60	24	70
ENSOCUG00000000184	508	280	266	196
ENSOCUG00000000185	5752	4991	3737	4043
ENSOCUG00000000186	925	590	481	815
ENSOCUG00000000187	2011	1869	1629	1415
ENSOCUG00000000188	2493	1754	1475	2029
ENSOCUG00000000191	175	212	159	82
ENSOCUG00000000193	5302	3542	3205	3421
ENSOCUG00000000194	109	105	83	113
ENSOCUG00000000195	12	44	18	52
ENSOCUG00000000197	2092	693	741	732
ENSOCUG00000000199	2	8	6	0
ENSOCUG00000000200	4806	3612	3455	4391
ENSOCUG00000000201	15	23	15	12
ENSOCUG00000000203	6134	4498	6776	6260
ENSOCUG00000000204	0	0	0	0
ENSOCUG00000000205	24	39	44	28
ENSOCUG00000000206	0	2	0	0
ENSOCUG00000000208	0	0	0	0
ENSOCUG00000000210	0	0	0	0
ENSOCUG00000000213	20	62	34	50
ENSOCUG00000000214	112	107	70	86
ENSOCUG00000000215	368	610	156	210
ENSOCUG00000000218	745	498	404	893
ENSOCUG00000000219	0	0	0	0
ENSOCUG00000000220	6719	4725	6331	7952
ENSOCUG00000000221	0	1	0	4
ENSOCUG00000000222	118	270	124	96
ENSOCUG00000000224	7	19	8	8
ENSOCUG00000000227	317	602	370	246
ENSOCUG00000000228	348	530	384	376
ENSOCUG00000000229	3556	3371	2183	2552
ENSOCUG00000000230	301	298	332	392
ENSOCUG00000000231	574	357	445	499
ENSOCUG00000000232	3	18	7	5
ENSOCUG00000000233	56	72	128	98
ENSOCUG00000000234	1942	1541	1051	1201
ENSOCUG00000000236	391	587	375	416
ENSOCUG00000000237	524	612	381	346
ENSOCUG00000000239	3	2	0	0
ENSOCUG00000000241	728	573	645	209
ENSOCUG00000000242	12	12	6	0
ENSOCUG00000000243	0	0	0	0
ENSOCUG00000000244	762	572	389	536
ENSOCUG00000000245	2680	2068	1633	2129
ENSOCUG00000000247	1829	1744	1295	915
ENSOCUG00000000248	738	558	507	831
ENSOCUG00000000249	1805	3513	1712	1669
ENSOCUG00000000250	186	506	638	230
ENSOCUG00000000251	7030	5646	4774	5901
ENSOCUG00000000252	5	6	2	10
ENSOCUG00000000255	3908	2611	2496	4066
ENSOCUG00000000256	517	522	299	565
ENSOCUG00000000258	2252	2684	3383	3370
ENSOCUG00000000259	317	236	219	318
ENSOCUG00000000263	163	242	90	109
ENSOCUG00000000264	6747	4995	3545	4613
ENSOCUG00000000265	26	41	6	42
ENSOCUG00000000266	286	237	143	146
ENSOCUG00000000268	173	59	191	166
ENSOCUG00000000269	551	473	404	603
ENSOCUG00000000270	5255	2815	3380	5841
ENSOCUG00000000271	3352	4852	5175	6926
ENSOCUG00000000272	4405	3610	2846	3820
ENSOCUG00000000274	1254	1048	913	794
ENSOCUG00000000276	494	543	363	301
ENSOCUG00000000277	684	827	707	769
ENSOCUG00000000278	2618	2509	1866	2491
ENSOCUG00000000280	8	6	2	2
ENSOCUG00000000281	948	730	788	971
ENSOCUG00000000285	2095	1249	1151	1154
ENSOCUG00000000286	3408	2710	2739	3491
ENSOCUG00000000289	980	1559	916	910
ENSOCUG00000000290	2674	2716	1804	2414
ENSOCUG00000000291	4459	3348	3189	4233
ENSOCUG00000000292	18	46	13	20
ENSOCUG00000000293	10	5	4	8
ENSOCUG00000000297	956	768	758	566
ENSOCUG00000000298	3768	3496	2512	2635
ENSOCUG00000000299	0	0	0	0
ENSOCUG00000000300	1760	1168	1031	1219
ENSOCUG00000000301	2442	1848	1138	1639
ENSOCUG00000000302	692	764	407	317
ENSOCUG00000000303	8	2	0	0
ENSOCUG00000000304	563	518	422	304
ENSOCUG00000000305	223	184	138	180
ENSOCUG00000000306	530	420	363	221
ENSOCUG00000000307	691	900	370	276
ENSOCUG00000000308	22	54	48	72
ENSOCUG00000000309	0	0	0	0
ENSOCUG00000000310	0	4	4	0
ENSOCUG00000000312	642	840	760	632
ENSOCUG00000000313	2	2	0	2
ENSOCUG00000000315	98	26	104	49
ENSOCUG00000000318	677	694	382	650
ENSOCUG00000000319	12	28	17	15
ENSOCUG00000000320	80	90	41	30
ENSOCUG00000000321	2320	2291	1330	1453
ENSOCUG00000000322	1170	758	864	1134
ENSOCUG00000000323	2426	2102	1335	1534
ENSOCUG00000000324	2220	1528	1495	2425
ENSOCUG00000000325	404	294	351	191
ENSOCUG00000000326	976	564	431	797
ENSOCUG00000000328	845	1155	820	776
ENSOCUG00000000329	2194	1807	1735	947
ENSOCUG00000000330	0	0	0	0
ENSOCUG00000000331	704	646	551	776
ENSOCUG00000000333	382	336	238	219
ENSOCUG00000000334	2912	1816	1467	2157
ENSOCUG00000000336	1489	1229	1056	1246
ENSOCUG00000000338	10033	9471	10058	9438
ENSOCUG00000000339	540	335	318	586
ENSOCUG00000000341	6	4	4	2
ENSOCUG00000000342	2	10	0	2
ENSOCUG00000000343	1796	1425	970	1194
ENSOCUG00000000344	1150	880	739	1161
ENSOCUG00000000345	386	541	264	406
ENSOCUG00000000346	1737	1315	1035	1502
ENSOCUG00000000347	4027	5026	3418	4324
ENSOCUG00000000348	855	743	707	814
ENSOCUG00000000349	40	95	46	49
ENSOCUG00000000350	0	0	0	0
ENSOCUG00000000353	980	800	640	794
ENSOCUG00000000354	469	504	464	686
ENSOCUG00000000355	207	388	100	158
ENSOCUG00000000356	3227	2411	2113	2626
ENSOCUG00000000357	520	751	460	326
ENSOCUG00000000358	1975	2047	1485	1585
ENSOCUG00000000359	4960	4784	3295	4012
ENSOCUG00000000360	994	417	102	241
ENSOCUG00000000361	0	2	1	0
ENSOCUG00000000363	62	760	413	182
ENSOCUG00000000364	714	675	497	510
ENSOCUG00000000365	1402	1081	1302	1600
ENSOCUG00000000367	1326	912	868	1185
ENSOCUG00000000368	1316	1125	1154	1388
ENSOCUG00000000370	528	802	644	748
ENSOCUG00000000371	118	111	76	59
ENSOCUG00000000373	0	0	0	0
ENSOCUG00000000374	1399	1725	1255	875
ENSOCUG00000000375	272	181	108	158
ENSOCUG00000000377	519	322	279	279
ENSOCUG00000000378	11	9	8	21
ENSOCUG00000000379	0	0	0	0
ENSOCUG00000000380	309	238	344	332
ENSOCUG00000000381	853	620	491	535
ENSOCUG00000000382	3030	2812	2083	1319
ENSOCUG00000000383	0	0	0	0
ENSOCUG00000000384	4	0	4	0
ENSOCUG00000000385	854	1068	709	699
ENSOCUG00000000386	104	57	28	63
ENSOCUG00000000387	6	0	5	6
ENSOCUG00000000388	221	130	349	271
ENSOCUG00000000389	0	0	4	0
ENSOCUG00000000391	44	58	16	10
ENSOCUG00000000392	1345	878	781	856
ENSOCUG00000000393	0	0	0	0
ENSOCUG00000000397	1274	1394	811	993
ENSOCUG00000000398	421	266	196	85
ENSOCUG00000000399	0	0	0	0
ENSOCUG00000000401	584	466	339	188
ENSOCUG00000000402	10	4	4	2
ENSOCUG00000000403	1205	756	812	1151
ENSOCUG00000000404	1892	2502	1434	1405
ENSOCUG00000000405	988	1094	821	1040
ENSOCUG00000000406	687	588	480	532
ENSOCUG00000000407	6	0	0	2
ENSOCUG00000000408	1418	1249	1348	1956
ENSOCUG00000000409	27040	34449	37653	26998
ENSOCUG00000000410	1463	1038	659	586
ENSOCUG00000000412	735	580	517	491
ENSOCUG00000000416	1387	2196	1542	1685
ENSOCUG00000000417	0	0	0	0
ENSOCUG00000000418	264	71	142	118
ENSOCUG00000000421	5	0	0	0
ENSOCUG00000000422	33	17	12	8
ENSOCUG00000000423	24	46	55	24
ENSOCUG00000000425	2666	1733	1609	2436
ENSOCUG00000000426	736	450	387	370
ENSOCUG00000000427	16	14	36	40
ENSOCUG00000000429	1994	1923	1642	1946
ENSOCUG00000000431	126	110	386	38
ENSOCUG00000000432	12831	10334	9727	11652
ENSOCUG00000000435	310	276	199	162
ENSOCUG00000000436	20	0	16	14
ENSOCUG00000000437	354	184	391	288
ENSOCUG00000000438	104	18	48	24
ENSOCUG00000000439	5278	4059	4413	5774
ENSOCUG00000000440	393	362	308	421
ENSOCUG00000000441	62	24	28	40
ENSOCUG00000000442	1204	1022	702	1119
ENSOCUG00000000444	461	399	286	382
ENSOCUG00000000445	58	50	55	42
ENSOCUG00000000446	964	881	687	360
ENSOCUG00000000448	12	2	10	6
ENSOCUG00000000451	23	6	10	16
ENSOCUG00000000454	0	0	0	0
ENSOCUG00000000455	1319	1456	999	888
ENSOCUG00000000457	0	0	0	0
ENSOCUG00000000459	563	699	476	792
ENSOCUG00000000460	134	106	131	108
ENSOCUG00000000461	959	643	545	658
ENSOCUG00000000462	6277	3348	3076	5890
ENSOCUG00000000463	1446	964	1009	1242
ENSOCUG00000000464	365	242	262	312
ENSOCUG00000000466	1509	1083	907	1287
ENSOCUG00000000467	1086	798	884	664
ENSOCUG00000000468	98	98	78	59
ENSOCUG00000000470	676	1019	588	416
ENSOCUG00000000471	679	246	296	540
ENSOCUG00000000472	1617	1274	1080	1415
ENSOCUG00000000473	2940	3310	2323	1753
ENSOCUG00000000474	10	0	4	2
ENSOCUG00000000475	5151	5971	3510	4610
ENSOCUG00000000476	230	207	164	217
ENSOCUG00000000477	1468	1404	1087	941
ENSOCUG00000000478	57	18	22	27
ENSOCUG00000000479	1124	1347	1046	648
ENSOCUG00000000481	8237	6562	6319	7439
ENSOCUG00000000482	1120	1086	1043	1351
ENSOCUG00000000483	2	2	2	3
ENSOCUG00000000484	904	1001	727	434
ENSOCUG00000000485	413	266	325	497
ENSOCUG00000000486	287	180	174	252
ENSOCUG00000000487	485	618	327	258
ENSOCUG00000000488	6	0	6	2
ENSOCUG00000000489	689	533	487	725
ENSOCUG00000000490	44	23	25	12
ENSOCUG00000000491	0	0	0	0
ENSOCUG00000000493	866	676	422	549
ENSOCUG00000000494	808	836	810	974
ENSOCUG00000000495	0	0	0	0
ENSOCUG00000000498	3161	2740	2975	2749
ENSOCUG00000000499	2874	2479	2512	2363
ENSOCUG00000000500	147	119	92	147
ENSOCUG00000000501	2	2	0	0
ENSOCUG00000000502	89	81	52	53
ENSOCUG00000000503	1392	897	664	990
ENSOCUG00000000504	2	0	0	0
ENSOCUG00000000506	26	56	44	18
ENSOCUG00000000507	270	346	243	158
ENSOCUG00000000508	1095	847	764	1219
ENSOCUG00000000509	46	84	58	28
ENSOCUG00000000510	1873	1523	1057	1483
ENSOCUG00000000511	4105	3980	3205	4391
ENSOCUG00000000512	2113	1826	1296	1953
ENSOCUG00000000513	0	0	2	0
ENSOCUG00000000515	29	44	8	30
ENSOCUG00000000516	2284	1371	1043	1350
ENSOCUG00000000517	0	0	2	0
ENSOCUG00000000518	2571	2444	2410	2334
ENSOCUG00000000520	2008	1616	1708	2111
ENSOCUG00000000521	726	906	663	435
ENSOCUG00000000522	10	14	6	15
ENSOCUG00000000524	93	83	74	50
ENSOCUG00000000525	1522	918	822	936
ENSOCUG00000000526	4647	2089	2208	3648
ENSOCUG00000000527	2	0	0	0
ENSOCUG00000000528	14	45	22	4
ENSOCUG00000000530	986	783	772	525
ENSOCUG00000000531	509	645	456	546
ENSOCUG00000000532	3168	2362	4905	3529
ENSOCUG00000000533	51	50	30	30
ENSOCUG00000000534	3365	1763	1515	2184
ENSOCUG00000000535	140	250	114	106
ENSOCUG00000000536	5106	3795	2517	1801
ENSOCUG00000000539	7286	9593	6086	6882
ENSOCUG00000000540	426	209	92	495
ENSOCUG00000000541	0	0	0	0
ENSOCUG00000000543	223	89	83	87
ENSOCUG00000000544	0	0	0	0
ENSOCUG00000000545	554	471	269	501
ENSOCUG00000000547	351	143	265	222
ENSOCUG00000000548	921	769	616	732
ENSOCUG00000000551	8	0	2	0
ENSOCUG00000000552	1949	1226	959	1043
ENSOCUG00000000553	561	662	515	641
ENSOCUG00000000554	195	156	130	122
ENSOCUG00000000555	854	631	413	397
ENSOCUG00000000557	422	332	294	240
ENSOCUG00000000558	13331	6346	4949	6048
ENSOCUG00000000559	4491	4058	3451	3595
ENSOCUG00000000560	858	740	368	502
ENSOCUG00000000561	449	266	224	279
ENSOCUG00000000562	8469	6879	5065	8073
ENSOCUG00000000563	0	0	0	0
ENSOCUG00000000564	2519	2230	1649	2058
ENSOCUG00000000565	2151	1376	1600	1296
ENSOCUG00000000566	4737	2805	2036	4355
ENSOCUG00000000567	0	0	0	0
ENSOCUG00000000568	12313	5044	3391	9941
ENSOCUG00000000569	0	0	0	0
ENSOCUG00000000570	568	370	319	387
ENSOCUG00000000572	1420	1198	813	1272
ENSOCUG00000000573	1356	1279	1218	1440
ENSOCUG00000000574	464	287	121	339
ENSOCUG00000000575	28777	6852	10791	11104
ENSOCUG00000000576	53	54	10	32
ENSOCUG00000000577	2535	2089	2123	2503
ENSOCUG00000000578	80	84	60	73
ENSOCUG00000000579	16	0	8	10
ENSOCUG00000000580	12	2	124	36
ENSOCUG00000000581	3766	4389	3218	2800
ENSOCUG00000000582	2724	2022	1865	1958
ENSOCUG00000000583	1158	1147	804	1044
ENSOCUG00000000584	452	525	349	449
ENSOCUG00000000585	57	145	78	84
ENSOCUG00000000586	3248	2366	1928	2363
ENSOCUG00000000587	5632	3463	3570	4383
ENSOCUG00000000588	1346	1486	1001	1014
ENSOCUG00000000589	245	267	191	163
ENSOCUG00000000590	554	470	296	492
ENSOCUG00000000591	0	11	13	17
ENSOCUG00000000592	2	14	2	8
ENSOCUG00000000593	4662	2659	1874	2724
ENSOCUG00000000594	508	371	264	331
ENSOCUG00000000595	1083	818	687	735
ENSOCUG00000000596	3397	3497	2438	2825
ENSOCUG00000000597	79	28	72	54
ENSOCUG00000000598	2511	2274	2663	2594
ENSOCUG00000000601	3819	2285	2359	3441
ENSOCUG00000000602	160	94	96	111
ENSOCUG00000000603	24	98	37	62
ENSOCUG00000000604	17364	18219	14273	17114
ENSOCUG00000000605	0	0	0	3
ENSOCUG00000000606	312	327	362	274
ENSOCUG00000000607	2300	2646	2239	1720
ENSOCUG00000000608	5866	5341	5688	5570
ENSOCUG00000000609	23	22	9	8
ENSOCUG00000000611	10612	14218	10137	7515
ENSOCUG00000000612	171	180	85	116
ENSOCUG00000000613	1343	822	803	876
ENSOCUG00000000614	398	280	185	259
ENSOCUG00000000615	931	670	648	1038
ENSOCUG00000000616	72	28	294	135
ENSOCUG00000000617	529	257	318	445
ENSOCUG00000000618	1553	1141	802	1546
ENSOCUG00000000619	2733	1342	1423	3557
ENSOCUG00000000621	1294	1650	1317	820
ENSOCUG00000000623	8	4	0	8
ENSOCUG00000000624	1767	1267	805	1113
ENSOCUG00000000625	2596	1822	1808	2437
ENSOCUG00000000626	542	502	455	489
ENSOCUG00000000628	546	489	330	384
ENSOCUG00000000629	315	498	352	276
ENSOCUG00000000630	449	660	436	320
ENSOCUG00000000631	1201	743	562	847
ENSOCUG00000000632	2	4	0	2
ENSOCUG00000000633	3636	3828	2708	3211
ENSOCUG00000000634	633	401	452	599
ENSOCUG00000000635	44	73	74	72
ENSOCUG00000000636	2	4	6	6
ENSOCUG00000000637	48483	94059	46983	66053
ENSOCUG00000000638	240	307	167	210
ENSOCUG00000000641	229	182	122	103
ENSOCUG00000000644	0	0	0	0
ENSOCUG00000000645	115	178	96	108
ENSOCUG00000000648	18	18	12	6
ENSOCUG00000000649	1587	1276	1549	1644
ENSOCUG00000000650	256	356	334	230
ENSOCUG00000000651	162	178	140	119
ENSOCUG00000000652	0	2	0	0
ENSOCUG00000000653	3233	4329	2410	4192
ENSOCUG00000000655	213	151	172	157
ENSOCUG00000000656	0	0	0	0
ENSOCUG00000000657	40	22	20	20
ENSOCUG00000000658	338	266	502	626
ENSOCUG00000000659	66	126	112	86
ENSOCUG00000000660	0	0	0	0
ENSOCUG00000000661	4	0	6	4
ENSOCUG00000000663	0	0	0	0
ENSOCUG00000000664	2	0	0	0
ENSOCUG00000000666	0	0	0	2
ENSOCUG00000000668	1011	648	571	890
ENSOCUG00000000669	174	82	48	76
ENSOCUG00000000670	100	106	196	159
ENSOCUG00000000671	17	10	6	8
ENSOCUG00000000672	39	50	40	23
ENSOCUG00000000673	479	380	325	318
ENSOCUG00000000674	1183	1832	1012	1002
ENSOCUG00000000676	5944	6787	5975	7156
ENSOCUG00000000677	19983	17575	11119	15072
ENSOCUG00000000678	831	993	715	648
ENSOCUG00000000679	1092	1501	764	714
ENSOCUG00000000680	2143	1717	1797	2212
ENSOCUG00000000681	282	232	142	219
ENSOCUG00000000682	2316	1962	1568	1838
ENSOCUG00000000683	3904	3128	2556	3278
ENSOCUG00000000684	5912	5209	4562	5465
ENSOCUG00000000686	2	1	4	4
ENSOCUG00000000687	691	609	504	348
ENSOCUG00000000688	758	733	480	434
ENSOCUG00000000689	476	594	466	318
ENSOCUG00000000691	0	0	0	0
ENSOCUG00000000692	5212	3808	4644	5795
ENSOCUG00000000693	0	0	0	0
ENSOCUG00000000694	1981	1560	1381	1687
ENSOCUG00000000695	1183	1122	779	778
ENSOCUG00000000696	334	374	144	220
ENSOCUG00000000697	1275	954	839	1006
ENSOCUG00000000698	0	0	4	0
ENSOCUG00000000699	554	204	480	318
ENSOCUG00000000700	0	0	0	0
ENSOCUG00000000702	0	0	0	0
ENSOCUG00000000703	518	588	429	495
ENSOCUG00000000704	0	0	0	0
ENSOCUG00000000705	0	0	0	0
ENSOCUG00000000706	1951	2064	1479	1848
ENSOCUG00000000707	856	1009	601	1002
ENSOCUG00000000708	1336	1208	765	1439
ENSOCUG00000000709	2077	1379	1201	2952
ENSOCUG00000000711	43	26	36	45
ENSOCUG00000000713	1587	1083	1209	1240
ENSOCUG00000000714	97	97	79	150
ENSOCUG00000000715	17946	8966	9792	14069
ENSOCUG00000000716	564	185	266	472
ENSOCUG00000000717	8954	6833	6394	8363
ENSOCUG00000000718	275	70	93	84
ENSOCUG00000000719	1204	1615	1115	1198
ENSOCUG00000000720	1999	1513	1172	1585
ENSOCUG00000000721	292	402	430	295
ENSOCUG00000000722	1059	958	609	519
ENSOCUG00000000723	170	206	210	240
ENSOCUG00000000724	4770	2434	2229	3093
ENSOCUG00000000725	0	19	12	10
ENSOCUG00000000726	34	20	16	28
ENSOCUG00000000727	602	553	576	879
ENSOCUG00000000728	615	362	370	561
ENSOCUG00000000729	11697	8110	7951	12038
ENSOCUG00000000730	148	127	98	114
ENSOCUG00000000731	612	440	248	312
ENSOCUG00000000732	72	88	138	146
ENSOCUG00000000733	196	78	138	176
ENSOCUG00000000734	17166	12189	12192	16917
ENSOCUG00000000736	4	4	6	0
ENSOCUG00000000737	370	713	558	697
ENSOCUG00000000738	500	609	462	551
ENSOCUG00000000739	0	0	0	0
ENSOCUG00000000740	20329	10702	9330	12286
ENSOCUG00000000741	274	176	87	115
ENSOCUG00000000742	0	3	0	0
ENSOCUG00000000743	262	287	242	246
ENSOCUG00000000744	90490	75198	68226	46537
ENSOCUG00000000747	389	359	234	161
ENSOCUG00000000749	926	628	614	719
ENSOCUG00000000750	1052	846	965	1437
ENSOCUG00000000751	9	43	17	25
ENSOCUG00000000752	0	0	0	0
ENSOCUG00000000754	905	1065	1004	1294
ENSOCUG00000000755	919	1229	843	577
ENSOCUG00000000756	1907	1099	1112	2285
ENSOCUG00000000757	0	0	0	0
ENSOCUG00000000758	168	187	132	143
ENSOCUG00000000760	24	25	30	17
ENSOCUG00000000761	0	0	2	0
ENSOCUG00000000763	15620	6331	9788	10616
ENSOCUG00000000764	6742	4580	4929	3718
ENSOCUG00000000765	766	801	696	981
ENSOCUG00000000766	0	0	0	0
ENSOCUG00000000769	2520	1560	1526	1978
ENSOCUG00000000771	224	60	108	333
ENSOCUG00000000774	4	6	6	4
ENSOCUG00000000775	135	148	105	119
ENSOCUG00000000776	1047	717	657	886
ENSOCUG00000000777	4	2	0	2
ENSOCUG00000000778	521	299	256	310
ENSOCUG00000000779	253	173	319	252
ENSOCUG00000000780	1217	751	562	886
ENSOCUG00000000781	637	604	495	514
ENSOCUG00000000784	1558	2817	1349	2129
ENSOCUG00000000785	0	0	0	0
ENSOCUG00000000786	475	390	369	226
ENSOCUG00000000787	1654	884	886	1565
ENSOCUG00000000788	0	0	8	6
ENSOCUG00000000789	1519	1213	969	1250
ENSOCUG00000000790	3308	3005	2626	3131
ENSOCUG00000000791	47131	55203	42029	24088
ENSOCUG00000000792	6045	2693	2432	5631
ENSOCUG00000000793	395	466	1052	59
ENSOCUG00000000794	1268	1376	1267	886
ENSOCUG00000000795	2378	1911	1451	2337
ENSOCUG00000000796	0	0	0	0
ENSOCUG00000000797	30	2	8	0
ENSOCUG00000000798	793	618	411	424
ENSOCUG00000000799	0	0	0	0
ENSOCUG00000000800	868	956	707	544
ENSOCUG00000000802	29	20	16	4
ENSOCUG00000000803	541	399	233	334
ENSOCUG00000000804	210	204	201	243
ENSOCUG00000000805	381	317	319	266
ENSOCUG00000000806	1160	858	1021	1063
ENSOCUG00000000807	461	358	341	351
ENSOCUG00000000809	134	72	104	51
ENSOCUG00000000810	2150	2192	1876	2106
ENSOCUG00000000811	1017	1158	920	861
ENSOCUG00000000812	170	304	196	285
ENSOCUG00000000813	13	13	7	6
ENSOCUG00000000814	220	320	380	344
ENSOCUG00000000815	51	24	14	54
ENSOCUG00000000816	1433	1639	1128	829
ENSOCUG00000000817	4367	2999	2245	3290
ENSOCUG00000000818	2988	2443	2053	2476
ENSOCUG00000000819	346	223	291	338
ENSOCUG00000000820	1229	1289	998	1432
ENSOCUG00000000821	2027	2800	2006	2176
ENSOCUG00000000822	129	251	127	129
ENSOCUG00000000823	769	466	370	486
ENSOCUG00000000824	6338	4927	5340	6370
ENSOCUG00000000825	4	2	2	0
ENSOCUG00000000826	1517	1437	1340	1631
ENSOCUG00000000827	41849	70535	74165	71419
ENSOCUG00000000828	18694	13960	8930	9356
ENSOCUG00000000829	72	44	36	42
ENSOCUG00000000830	8338	3518	2900	3598
ENSOCUG00000000831	96	18	74	40
ENSOCUG00000000832	454	193	197	285
ENSOCUG00000000833	1122	741	672	1228
ENSOCUG00000000834	14	4	2	22
ENSOCUG00000000835	329	402	293	341
ENSOCUG00000000836	0	2	2	0
ENSOCUG00000000837	1452	1464	1028	1236
ENSOCUG00000000838	0	0	2	2
ENSOCUG00000000841	0	0	0	0
ENSOCUG00000000843	18	6	2	22
ENSOCUG00000000847	1243	2252	1527	2509
ENSOCUG00000000848	4730	3526	2474	3672
ENSOCUG00000000849	200	202	115	201
ENSOCUG00000000850	0	4	2	10
ENSOCUG00000000851	70902	84269	77046	87460
ENSOCUG00000000852	41	62	42	80
ENSOCUG00000000853	83	107	90	128
ENSOCUG00000000854	2	0	0	0
ENSOCUG00000000855	483	504	347	297
ENSOCUG00000000856	199	137	100	77
ENSOCUG00000000857	389	381	195	406
ENSOCUG00000000859	262	309	218	337
ENSOCUG00000000861	1295	1246	904	534
ENSOCUG00000000863	26	22	32	60
ENSOCUG00000000864	2871	1128	1235	1949
ENSOCUG00000000865	491	499	549	244
ENSOCUG00000000866	466	293	271	310
ENSOCUG00000000867	856	806	762	773
ENSOCUG00000000868	165	18	106	24
ENSOCUG00000000869	2	0	10	16
ENSOCUG00000000872	5	4	0	6
ENSOCUG00000000874	1543	1641	1006	976
ENSOCUG00000000875	204	360	262	194
ENSOCUG00000000876	2400	1807	1590	3034
ENSOCUG00000000877	514	287	288	164
ENSOCUG00000000878	1400	1694	1354	808
ENSOCUG00000000880	63294	74869	34627	42597
ENSOCUG00000000881	4673	2630	1955	3658
ENSOCUG00000000882	2594	2281	1829	2188
ENSOCUG00000000883	2	0	0	0
ENSOCUG00000000884	621	363	349	499
ENSOCUG00000000885	1734	1787	1083	950
ENSOCUG00000000887	2837	2950	1880	2444
ENSOCUG00000000888	0	0	0	0
ENSOCUG00000000889	920	560	619	987
ENSOCUG00000000894	6	2	2	0
ENSOCUG00000000895	1950	1266	1500	1609
ENSOCUG00000000896	540	371	326	506
ENSOCUG00000000897	645	402	339	659
ENSOCUG00000000898	1397	1442	1067	1377
ENSOCUG00000000901	14	0	12	8
ENSOCUG00000000903	8	6	4	12
ENSOCUG00000000905	24	128	18	44
ENSOCUG00000000906	92	50	46	48
ENSOCUG00000000907	1144	890	686	822
ENSOCUG00000000908	0	0	0	0
ENSOCUG00000000909	890	728	688	824
ENSOCUG00000000910	234	235	156	124
ENSOCUG00000000911	207	414	192	128
ENSOCUG00000000912	0	0	0	0
ENSOCUG00000000915	1414	2221	1212	980
ENSOCUG00000000916	477	306	199	375
ENSOCUG00000000918	0	0	0	0
ENSOCUG00000000919	1792	1627	1229	1163
ENSOCUG00000000920	434	417	340	453
ENSOCUG00000000921	733	580	374	510
ENSOCUG00000000922	2100	1913	1382	981
ENSOCUG00000000923	12	11	8	0
ENSOCUG00000000924	335	279	228	277
ENSOCUG00000000925	2397	2292	2053	2262
ENSOCUG00000000927	7579	12952	6797	7587
ENSOCUG00000000928	3783	2438	2543	3699
ENSOCUG00000000929	607	451	400	537
ENSOCUG00000000930	470	231	185	267
ENSOCUG00000000931	2070	1046	1077	1532
ENSOCUG00000000932	0	14	9	2
ENSOCUG00000000933	953	1335	684	606
ENSOCUG00000000934	0	0	8	0
ENSOCUG00000000936	74	64	84	80
ENSOCUG00000000937	2322	1402	1262	1981
ENSOCUG00000000938	567	538	370	313
ENSOCUG00000000939	895	758	587	505
ENSOCUG00000000940	539	345	392	295
ENSOCUG00000000941	13340	11098	8731	12321
ENSOCUG00000000942	6829	4605	4299	6057
ENSOCUG00000000943	293	428	192	155
ENSOCUG00000000944	204	273	174	171
ENSOCUG00000000945	36	98	43	56
ENSOCUG00000000947	228	226	179	189
ENSOCUG00000000948	20	8	14	20
ENSOCUG00000000950	2	0	2	0
ENSOCUG00000000953	170	56	120	52
ENSOCUG00000000956	902	992	757	946
ENSOCUG00000000957	10	32	0	9
ENSOCUG00000000958	2170	1601	1070	2127
ENSOCUG00000000959	3575	3552	2207	2659
ENSOCUG00000000960	290	266	180	238
ENSOCUG00000000962	156	64	70	74
ENSOCUG00000000963	838	622	449	883
ENSOCUG00000000965	2188	1430	1633	2046
ENSOCUG00000000966	1557	1678	1231	1112
ENSOCUG00000000967	3220	3097	2090	2873
ENSOCUG00000000968	1311	2243	815	977
ENSOCUG00000000969	0	0	0	0
ENSOCUG00000000972	121	63	80	35
ENSOCUG00000000973	0	2	0	4
ENSOCUG00000000974	246	516	244	243
ENSOCUG00000000977	2	0	2	0
ENSOCUG00000000978	7540	9610	8407	7964
ENSOCUG00000000979	968	627	579	401
ENSOCUG00000000980	1160	1495	761	705
ENSOCUG00000000981	0	0	4	0
ENSOCUG00000000982	1041	1265	1090	1091
ENSOCUG00000000983	844	998	722	538
ENSOCUG00000000984	33	44	50	46
ENSOCUG00000000986	40	24	26	20
ENSOCUG00000000987	4078	4279	2992	4205
ENSOCUG00000000988	751	1094	614	539
ENSOCUG00000000989	5368	4267	3323	3541
ENSOCUG00000000990	0	0	10	0
ENSOCUG00000000991	766	458	370	506
ENSOCUG00000000996	5168	4071	3784	5568
ENSOCUG00000000997	347	351	269	355
ENSOCUG00000000998	1418	733	590	1016
ENSOCUG00000000999	43	37	14	22
ENSOCUG00000001001	1575	1057	1009	1744
ENSOCUG00000001002	497	441	316	456
ENSOCUG00000001004	6	14	4	8
ENSOCUG00000001005	1679	1448	879	1055
ENSOCUG00000001006	48	118	60	29
ENSOCUG00000001008	1080	727	540	607
ENSOCUG00000001009	5413	4488	4473	6435
ENSOCUG00000001011	18	20	34	22
ENSOCUG00000001012	2	0	0	2
ENSOCUG00000001013	21088	13912	10301	13166
ENSOCUG00000001015	0	6	2	2
ENSOCUG00000001016	3961	2814	2928	3273
ENSOCUG00000001018	2	3	2	2
ENSOCUG00000001019	0	0	0	0
ENSOCUG00000001020	804	1226	1062	1139
ENSOCUG00000001021	0	0	0	0
ENSOCUG00000001022	8	8	16	6
ENSOCUG00000001023	9756	8342	8581	10667
ENSOCUG00000001026	2396	2248	1710	1161
ENSOCUG00000001027	0	2	0	2
ENSOCUG00000001028	76	94	57	90
ENSOCUG00000001029	24	26	16	28
ENSOCUG00000001030	1423	1764	1349	1325
ENSOCUG00000001031	356	334	232	171
ENSOCUG00000001032	72	30	12	51
ENSOCUG00000001033	2	2	0	0
ENSOCUG00000001034	768	696	542	659
ENSOCUG00000001035	5799	5423	5947	4811
ENSOCUG00000001036	2	4	0	4
ENSOCUG00000001037	14	0	10	9
ENSOCUG00000001039	44	36	45	34
ENSOCUG00000001040	172	76	132	106
ENSOCUG00000001041	268	83	176	186
ENSOCUG00000001042	6494	7988	5429	3411
ENSOCUG00000001043	9938	13569	11888	15131
ENSOCUG00000001045	143	96	45	65
ENSOCUG00000001046	356	294	402	537
ENSOCUG00000001047	704	780	676	766
ENSOCUG00000001048	1262	1074	816	1201
ENSOCUG00000001049	0	0	4	0
ENSOCUG00000001050	2942	3006	1948	2559
ENSOCUG00000001051	2	12	2	14
ENSOCUG00000001052	2165	1886	1810	1817
ENSOCUG00000001053	465	304	233	366
ENSOCUG00000001054	2153	2016	1434	1527
ENSOCUG00000001055	51	61	22	21
ENSOCUG00000001057	1269	709	614	837
ENSOCUG00000001058	270	312	250	240
ENSOCUG00000001060	1214	779	665	838
ENSOCUG00000001061	902	493	547	765
ENSOCUG00000001062	974	1194	1108	1368
ENSOCUG00000001063	0	0	0	0
ENSOCUG00000001067	0	0	0	0
ENSOCUG00000001068	2	2	10	12
ENSOCUG00000001069	2150	1826	1638	1895
ENSOCUG00000001070	92	156	90	88
ENSOCUG00000001071	0	0	0	0
ENSOCUG00000001072	4	0	0	2
ENSOCUG00000001073	295	205	129	192
ENSOCUG00000001074	0	0	0	0
ENSOCUG00000001075	22	14	27	28
ENSOCUG00000001076	720	365	394	424
ENSOCUG00000001077	4	18	8	0
ENSOCUG00000001078	648	516	315	436
ENSOCUG00000001081	2755	1839	2170	2758
ENSOCUG00000001082	23	32	8	44
ENSOCUG00000001083	0	0	0	0
ENSOCUG00000001084	136	118	98	117
ENSOCUG00000001085	0	2	2	0
ENSOCUG00000001086	295	296	179	271
ENSOCUG00000001087	0	0	0	0
ENSOCUG00000001088	662	550	445	600
ENSOCUG00000001089	0	2	10	6
ENSOCUG00000001090	0	2	0	0
ENSOCUG00000001092	0	0	0	0
ENSOCUG00000001093	700	520	410	428
ENSOCUG00000001094	0	0	0	0
ENSOCUG00000001096	2449	1670	2005	2555
ENSOCUG00000001097	1152	711	566	719
ENSOCUG00000001098	11	16	44	22
ENSOCUG00000001099	0	0	0	0
ENSOCUG00000001100	30	16	24	15
ENSOCUG00000001101	2346	1827	1485	1256
ENSOCUG00000001102	40	81	38	49
ENSOCUG00000001103	964	296	352	554
ENSOCUG00000001104	15428	15238	11105	12698
ENSOCUG00000001105	8	2	0	8
ENSOCUG00000001106	0	0	0	0
ENSOCUG00000001107	1372	990	735	528
ENSOCUG00000001108	1721	1679	1154	1095
ENSOCUG00000001109	3359	3147	1767	2245
ENSOCUG00000001110	0	0	0	0
ENSOCUG00000001111	2559	2243	1908	2068
ENSOCUG00000001112	5951	4970	5083	7276
ENSOCUG00000001113	3981	3199	2297	2668
ENSOCUG00000001114	5	6	0	3
ENSOCUG00000001116	159	213	107	80
ENSOCUG00000001117	2	3	0	4
ENSOCUG00000001119	846	726	576	893
ENSOCUG00000001120	10827	7234	6929	8514
ENSOCUG00000001121	3333	2296	2049	2703
ENSOCUG00000001122	0	0	0	0
ENSOCUG00000001123	2	10	14	2
ENSOCUG00000001124	1354	1273	1645	1404
ENSOCUG00000001125	958	743	761	989
ENSOCUG00000001127	901	527	507	965
ENSOCUG00000001129	21	10	26	6
ENSOCUG00000001130	773	592	626	809
ENSOCUG00000001131	1313	793	845	761
ENSOCUG00000001134	0	0	0	0
ENSOCUG00000001135	8	6	2	0
ENSOCUG00000001136	605	503	513	342
ENSOCUG00000001137	7488	13823	9721	15300
ENSOCUG00000001138	2544	2249	1826	1989
ENSOCUG00000001139	44	73	78	64
ENSOCUG00000001142	1508	829	845	1242
ENSOCUG00000001143	903	534	72	294
ENSOCUG00000001144	6654	4965	3361	4433
ENSOCUG00000001145	2	0	2	4
ENSOCUG00000001150	1056	410	396	492
ENSOCUG00000001151	1033	549	500	592
ENSOCUG00000001152	2759	1923	2529	2483
ENSOCUG00000001153	328	527	279	262
ENSOCUG00000001155	25247	19147	19405	26618
ENSOCUG00000001156	0	0	0	0
ENSOCUG00000001157	0	0	0	0
ENSOCUG00000001158	21	7	12	4
ENSOCUG00000001159	2	2	0	0
ENSOCUG00000001160	8	8	2	4
ENSOCUG00000001161	957	838	574	650
ENSOCUG00000001162	1423	1427	803	1148
ENSOCUG00000001163	443	605	204	281
ENSOCUG00000001164	2497	2200	1752	2015
ENSOCUG00000001165	9041	6429	6018	7664
ENSOCUG00000001166	437	406	355	293
ENSOCUG00000001167	0	0	0	0
ENSOCUG00000001168	416	381	255	253
ENSOCUG00000001169	63117	62280	28624	40642
ENSOCUG00000001170	734	796	591	318
ENSOCUG00000001171	598	257	434	461
ENSOCUG00000001172	236	128	162	232
ENSOCUG00000001173	82	45	53	98
ENSOCUG00000001174	333	183	235	358
ENSOCUG00000001175	2122	1782	1520	2190
ENSOCUG00000001177	5377	4415	2896	3245
ENSOCUG00000001178	59	45	65	38
ENSOCUG00000001179	1093	1365	817	1027
ENSOCUG00000001180	1619	1166	1215	1407
ENSOCUG00000001181	110	108	120	74
ENSOCUG00000001183	60	108	92	198
ENSOCUG00000001184	469	307	290	349
ENSOCUG00000001185	6	1	0	4
ENSOCUG00000001186	1812	2269	1270	1192
ENSOCUG00000001188	48	12	43	8
ENSOCUG00000001190	69	263	149	35
ENSOCUG00000001191	1641	2078	1747	2742
ENSOCUG00000001192	0	0	0	2
ENSOCUG00000001193	0	0	0	0
ENSOCUG00000001196	0	0	4	0
ENSOCUG00000001197	1218	1136	974	1329
ENSOCUG00000001200	1008	551	494	772
ENSOCUG00000001201	2	2	2	0
ENSOCUG00000001203	891	845	502	663
ENSOCUG00000001205	14	8	4	8
ENSOCUG00000001206	0	0	0	2
ENSOCUG00000001207	0	0	0	4
ENSOCUG00000001208	4	6	6	12
ENSOCUG00000001209	4	4	6	4
ENSOCUG00000001211	254	192	204	64
ENSOCUG00000001212	8198	9316	4834	5406
ENSOCUG00000001214	1774	1347	965	1090
ENSOCUG00000001215	5560	4565	6046	5553
ENSOCUG00000001216	3490	2371	1715	1756
ENSOCUG00000001217	1627	1353	1081	1758
ENSOCUG00000001218	150	270	104	170
ENSOCUG00000001219	805	611	569	875
ENSOCUG00000001220	2572	2381	1602	1777
ENSOCUG00000001221	337	382	243	150
ENSOCUG00000001222	240	342	404	204
ENSOCUG00000001223	1113	680	622	817
ENSOCUG00000001224	70	90	32	30
ENSOCUG00000001225	16	13	14	15
ENSOCUG00000001227	45	85	23	31
ENSOCUG00000001228	1104	876	791	861
ENSOCUG00000001229	62	84	73	147
ENSOCUG00000001230	281	112	120	266
ENSOCUG00000001231	1105	1806	1774	926
ENSOCUG00000001232	16974	21298	14396	11123
ENSOCUG00000001233	494	462	310	392
ENSOCUG00000001234	83	173	74	121
ENSOCUG00000001235	1144	893	820	704
ENSOCUG00000001236	18	6	14	6
ENSOCUG00000001239	102	351	272	133
ENSOCUG00000001241	49	75	24	40
ENSOCUG00000001242	17	18	22	12
ENSOCUG00000001246	250	340	160	208
ENSOCUG00000001247	234	156	160	253
ENSOCUG00000001248	11	9	1	4
ENSOCUG00000001249	358	444	300	359
ENSOCUG00000001250	657	544	771	913
ENSOCUG00000001251	91	56	51	73
ENSOCUG00000001254	133	219	192	199
ENSOCUG00000001255	0	0	2	2
ENSOCUG00000001256	38	32	48	24
ENSOCUG00000001257	32	28	16	6
ENSOCUG00000001258	239	200	183	231
ENSOCUG00000001259	0	0	1	0
ENSOCUG00000001261	0	0	0	0
ENSOCUG00000001263	0	2	0	4
ENSOCUG00000001264	108	108	16	79
ENSOCUG00000001265	418	281	289	406
ENSOCUG00000001266	2052	1629	1626	2438
ENSOCUG00000001267	1112	1843	1776	453
ENSOCUG00000001269	9870	5988	5214	6933
ENSOCUG00000001270	2417	2028	2376	2980
ENSOCUG00000001271	1170	1255	782	751
ENSOCUG00000001272	2269	1051	1103	1163
ENSOCUG00000001277	2	0	0	2
ENSOCUG00000001278	131	66	93	92
ENSOCUG00000001279	2129	2561	2700	2972
ENSOCUG00000001280	21510	15171	13971	17969
ENSOCUG00000001281	653	393	389	493
ENSOCUG00000001284	2203	1498	1546	2214
ENSOCUG00000001286	1651	1439	1203	1204
ENSOCUG00000001288	398	526	394	348
ENSOCUG00000001289	1176	750	646	919
ENSOCUG00000001290	100	131	92	76
ENSOCUG00000001292	5714	6013	4814	4389
ENSOCUG00000001294	66	82	130	170
ENSOCUG00000001295	1903	1479	1355	1816
ENSOCUG00000001296	0	4	6	0
ENSOCUG00000001297	1106	1752	1047	815
ENSOCUG00000001298	8	0	0	2
ENSOCUG00000001299	4377	4526	2181	3287
ENSOCUG00000001300	163	180	172	157
ENSOCUG00000001301	0	0	0	0
ENSOCUG00000001302	180	284	148	144
ENSOCUG00000001303	5851	5983	4335	3900
ENSOCUG00000001304	267	149	122	142
ENSOCUG00000001305	91	115	109	32
ENSOCUG00000001306	328	316	196	416
ENSOCUG00000001307	1035	909	712	471
ENSOCUG00000001309	641	551	519	738
ENSOCUG00000001310	194	167	139	137
ENSOCUG00000001311	823	546	394	680
ENSOCUG00000001314	8	42	15	11
ENSOCUG00000001315	587	546	453	416
ENSOCUG00000001316	2	0	0	0
ENSOCUG00000001317	2064	2154	2518	2854
ENSOCUG00000001319	1710	1610	1257	1364
ENSOCUG00000001320	624	565	617	810
ENSOCUG00000001322	0	0	23	0
ENSOCUG00000001324	31820	19024	15866	26034
ENSOCUG00000001326	1767	981	584	500
ENSOCUG00000001327	0	2	4	0
ENSOCUG00000001328	1460	1066	814	1296
ENSOCUG00000001331	40	100	98	62
ENSOCUG00000001333	0	0	0	0
ENSOCUG00000001334	14715	10581	7800	7498
ENSOCUG00000001335	16	10	20	12
ENSOCUG00000001336	1079	789	459	452
ENSOCUG00000001337	422	543	182	481
ENSOCUG00000001338	424	516	270	292
ENSOCUG00000001341	72	4	20	86
ENSOCUG00000001342	0	2	2	0
ENSOCUG00000001343	7198	5519	4187	4021
ENSOCUG00000001344	2	0	0	0
ENSOCUG00000001345	0	0	0	0
ENSOCUG00000001346	0	0	0	0
ENSOCUG00000001347	0	0	0	0
ENSOCUG00000001349	1428	1186	874	1218
ENSOCUG00000001350	1	9	6	2
ENSOCUG00000001351	125	38	68	45
ENSOCUG00000001352	1397	1203	766	653
ENSOCUG00000001353	221	273	155	188
ENSOCUG00000001355	4	0	6	0
ENSOCUG00000001357	2063	1974	1760	2243
ENSOCUG00000001360	1247	686	679	824
ENSOCUG00000001361	0	0	0	0
ENSOCUG00000001362	248	209	156	155
ENSOCUG00000001363	0	0	0	0
ENSOCUG00000001366	98	47	70	55
ENSOCUG00000001367	0	0	0	0
ENSOCUG00000001368	8	4	4	2
ENSOCUG00000001370	0	0	0	0
ENSOCUG00000001372	10	4	10	16
ENSOCUG00000001373	90	42	34	54
ENSOCUG00000001374	2	4	6	2
ENSOCUG00000001375	10201	3960	3281	3432
ENSOCUG00000001376	2	0	4	2
ENSOCUG00000001377	0	0	0	0
ENSOCUG00000001378	0	0	0	0
ENSOCUG00000001379	868	830	597	599
ENSOCUG00000001380	0	0	0	0
ENSOCUG00000001382	179	156	119	119
ENSOCUG00000001383	2189	1611	1309	1092
ENSOCUG00000001384	331	226	252	289
ENSOCUG00000001385	0	2	0	0
ENSOCUG00000001386	265	282	221	373
ENSOCUG00000001387	4	0	4	4
ENSOCUG00000001388	0	0	0	0
ENSOCUG00000001389	12	0	2	0
ENSOCUG00000001390	4531	2919	2451	3334
ENSOCUG00000001391	750	657	700	603
ENSOCUG00000001392	1372	1021	1137	1228
ENSOCUG00000001393	14	44	17	18
ENSOCUG00000001395	0	0	0	2
ENSOCUG00000001396	24432	12027	13588	10093
ENSOCUG00000001397	2046	2256	1507	1419
ENSOCUG00000001398	1237	977	700	994
ENSOCUG00000001401	2527	2525	2024	1504
ENSOCUG00000001402	4120	2854	2715	3744
ENSOCUG00000001403	0	0	0	0
ENSOCUG00000001405	525	667	284	421
ENSOCUG00000001406	226	244	121	196
ENSOCUG00000001407	349	342	139	354
ENSOCUG00000001408	6	2	2	0
ENSOCUG00000001409	1683	1613	962	1204
ENSOCUG00000001410	0	0	2	0
ENSOCUG00000001411	0	0	0	0
ENSOCUG00000001412	14750	22697	13826	11121
ENSOCUG00000001414	4389	4030	2948	3054
ENSOCUG00000001415	61	99	15	29
ENSOCUG00000001418	2256	1382	1591	1768
ENSOCUG00000001419	614	939	428	339
ENSOCUG00000001420	1641	792	628	1096
ENSOCUG00000001422	313	243	178	219
ENSOCUG00000001424	0	12	0	0
ENSOCUG00000001425	1189	1008	715	1119
ENSOCUG00000001426	664	597	343	268
ENSOCUG00000001427	2149	2201	2139	2526
ENSOCUG00000001428	991	944	686	684
ENSOCUG00000001429	1730	1696	1320	1618
ENSOCUG00000001430	4579	4160	3164	3369
ENSOCUG00000001431	0	0	0	0
ENSOCUG00000001432	858	1051	718	819
ENSOCUG00000001433	0	0	0	0
ENSOCUG00000001434	939	537	451	741
ENSOCUG00000001435	1890	2252	1590	1306
ENSOCUG00000001436	3830	5056	3483	4994
ENSOCUG00000001437	85	95	34	6
ENSOCUG00000001438	402	272	236	257
ENSOCUG00000001439	8844	8444	6776	11684
ENSOCUG00000001440	0	0	0	0
ENSOCUG00000001443	290	395	282	253
ENSOCUG00000001444	1261	1046	683	726
ENSOCUG00000001445	12	8	12	2
ENSOCUG00000001446	1811	753	966	1349
ENSOCUG00000001447	3930	3299	2408	2751
ENSOCUG00000001448	402	336	164	247
ENSOCUG00000001452	26	26	8	38
ENSOCUG00000001454	3397	2461	1443	1062
ENSOCUG00000001455	34401	17046	15166	21885
ENSOCUG00000001456	2552	1774	1783	2683
ENSOCUG00000001457	11	46	12	14
ENSOCUG00000001458	179	234	180	128
ENSOCUG00000001459	1129	900	698	764
ENSOCUG00000001460	772	795	583	496
ENSOCUG00000001461	4361	4907	6261	7161
ENSOCUG00000001462	2	6	6	12
ENSOCUG00000001463	0	0	0	0
ENSOCUG00000001464	3374	2677	2604	3348
ENSOCUG00000001465	74	60	47	46
ENSOCUG00000001466	1777	1703	1118	1130
ENSOCUG00000001467	3239	3699	3149	3766
ENSOCUG00000001468	14292	9220	8775	11934
ENSOCUG00000001469	1739	1639	1238	1483
ENSOCUG00000001470	387	783	455	235
ENSOCUG00000001473	55	60	66	122
ENSOCUG00000001475	3966	5056	3536	3244
ENSOCUG00000001477	6	0	0	0
ENSOCUG00000001478	1291	909	722	1035
ENSOCUG00000001479	1560	1213	1241	1191
ENSOCUG00000001480	1646	1215	1360	1732
ENSOCUG00000001481	522	256	262	181
ENSOCUG00000001484	0	0	2	0
ENSOCUG00000001485	167	68	26	78
ENSOCUG00000001486	894	973	994	1069
ENSOCUG00000001488	302	264	256	275
ENSOCUG00000001489	1508	1475	903	950
ENSOCUG00000001490	12	21	2	8
ENSOCUG00000001491	0	0	0	0
ENSOCUG00000001493	0	2	0	0
ENSOCUG00000001495	0	0	0	0
ENSOCUG00000001496	1497	1012	752	1040
ENSOCUG00000001497	42	33	62	91
ENSOCUG00000001498	1405	1116	882	790
ENSOCUG00000001499	1092	1257	1048	459
ENSOCUG00000001500	1618	1487	1167	1207
ENSOCUG00000001501	1221	1259	1707	1574
ENSOCUG00000001504	4572	4020	3126	3609
ENSOCUG00000001508	0	0	0	0
ENSOCUG00000001510	2	2	0	0
ENSOCUG00000001512	2	1	0	0
ENSOCUG00000001513	5070	3916	3993	5092
ENSOCUG00000001514	0	0	0	2
ENSOCUG00000001515	113	29	186	46
ENSOCUG00000001516	0	2	0	2
ENSOCUG00000001517	1847	1688	1565	2037
ENSOCUG00000001518	8	2	4	3
ENSOCUG00000001519	517	538	344	392
ENSOCUG00000001522	552	764	338	426
ENSOCUG00000001523	61	65	41	60
ENSOCUG00000001524	284	242	237	210
ENSOCUG00000001525	747	691	640	671
ENSOCUG00000001526	174	384	154	190
ENSOCUG00000001527	0	0	0	0
ENSOCUG00000001530	2706	2946	1890	1680
ENSOCUG00000001531	0	2	2	2
ENSOCUG00000001532	1890	1476	1218	690
ENSOCUG00000001535	534	495	295	342
ENSOCUG00000001536	292	1469	1307	1140
ENSOCUG00000001537	296	238	179	116
ENSOCUG00000001539	38	18	27	18
ENSOCUG00000001540	64	106	92	104
ENSOCUG00000001541	326	193	185	150
ENSOCUG00000001542	1354	1076	1577	1852
ENSOCUG00000001543	356	271	415	355
ENSOCUG00000001544	289	422	255	178
ENSOCUG00000001545	262	202	168	154
ENSOCUG00000001546	2	4	10	0
ENSOCUG00000001548	2	4	0	2
ENSOCUG00000001551	13085	14985	8891	7870
ENSOCUG00000001552	387	288	222	367
ENSOCUG00000001553	44049	20307	26174	35743
ENSOCUG00000001554	272	177	220	232
ENSOCUG00000001555	1976	1012	1534	1227
ENSOCUG00000001556	0	0	0	0
ENSOCUG00000001560	2261	1946	1441	1829
ENSOCUG00000001561	8	10	3	7
ENSOCUG00000001565	2559	2345	1595	1284
ENSOCUG00000001568	3873	3297	2670	2788
ENSOCUG00000001569	0	0	0	0
ENSOCUG00000001570	2705	1009	1250	1324
ENSOCUG00000001571	4391	3332	3098	3510
ENSOCUG00000001573	50	18	46	32
ENSOCUG00000001574	2492	2047	1657	2240
ENSOCUG00000001575	606	399	339	347
ENSOCUG00000001576	773	597	503	595
ENSOCUG00000001577	0	0	0	0
ENSOCUG00000001578	2350	2953	1879	1429
ENSOCUG00000001581	228	225	126	104
ENSOCUG00000001582	14	4	22	8
ENSOCUG00000001583	1818	1561	1079	1264
ENSOCUG00000001584	79	125	143	157
ENSOCUG00000001585	1207	973	781	1060
ENSOCUG00000001586	736	614	486	356
ENSOCUG00000001587	12893	5295	4489	7810
ENSOCUG00000001588	940	602	488	923
ENSOCUG00000001590	1544	1574	970	864
ENSOCUG00000001591	1354	1463	1012	905
ENSOCUG00000001592	385	346	204	313
ENSOCUG00000001594	220	112	128	96
ENSOCUG00000001595	4765	4845	2386	4550
ENSOCUG00000001596	2	8	14	25
ENSOCUG00000001597	4	4	8	2
ENSOCUG00000001598	10092	8544	6352	9602
ENSOCUG00000001599	103	105	210	148
ENSOCUG00000001600	0	0	0	0
ENSOCUG00000001601	2125	2136	2407	2516
ENSOCUG00000001602	2	2	0	0
ENSOCUG00000001603	65	48	31	30
ENSOCUG00000001604	175	122	92	146
ENSOCUG00000001605	1067	852	565	551
ENSOCUG00000001606	58234	70200	54123	46821
ENSOCUG00000001607	2	6	4	3
ENSOCUG00000001609	0	0	0	0
ENSOCUG00000001610	1136	881	785	1319
ENSOCUG00000001612	0	0	0	0
ENSOCUG00000001613	225	161	88	108
ENSOCUG00000001614	0	0	2	0
ENSOCUG00000001616	1852	1152	1565	1739
ENSOCUG00000001617	35	29	4	8
ENSOCUG00000001618	4503	3540	3885	3666
ENSOCUG00000001620	10270	7174	6233	6856
ENSOCUG00000001622	1532	1312	1483	1484
ENSOCUG00000001623	6	14	4	18
ENSOCUG00000001627	6	2	6	8
ENSOCUG00000001628	1627	1196	883	972
ENSOCUG00000001629	3218	2838	2493	2875
ENSOCUG00000001630	0	0	0	0
ENSOCUG00000001631	4	0	4	1
ENSOCUG00000001632	0	0	0	0
ENSOCUG00000001633	2684	2213	1685	1718
ENSOCUG00000001636	1283	920	898	1043
ENSOCUG00000001638	123	94	113	205
ENSOCUG00000001639	0	0	0	0
ENSOCUG00000001641	0	0	4	0
ENSOCUG00000001645	9118	5432	3930	7317
ENSOCUG00000001646	3501	3908	3088	1996
ENSOCUG00000001647	10	6	2	0
ENSOCUG00000001648	18	28	9	10
ENSOCUG00000001649	0	0	0	0
ENSOCUG00000001651	2709	1651	1314	2266
ENSOCUG00000001652	896	427	625	653
ENSOCUG00000001655	68	10	94	26
ENSOCUG00000001656	1074	845	675	848
ENSOCUG00000001657	938	830	665	685
ENSOCUG00000001659	0	0	0	0
ENSOCUG00000001660	24	42	32	18
ENSOCUG00000001661	13383	9694	9259	11049
ENSOCUG00000001662	14	16	14	18
ENSOCUG00000001663	0	0	0	0
ENSOCUG00000001665	186	137	120	184
ENSOCUG00000001667	18818	11979	9380	13317
ENSOCUG00000001669	260	158	161	181
ENSOCUG00000001670	591	778	536	307
ENSOCUG00000001671	3	0	18	16
ENSOCUG00000001672	349	207	189	181
ENSOCUG00000001673	488	418	333	191
ENSOCUG00000001674	64	66	76	74
ENSOCUG00000001675	698	530	402	696
ENSOCUG00000001676	442	223	299	367
ENSOCUG00000001677	4229	2951	1464	3807
ENSOCUG00000001678	4513	3770	2693	3060
ENSOCUG00000001679	0	0	0	0
ENSOCUG00000001680	0	10	8	0
ENSOCUG00000001681	322	159	189	273
ENSOCUG00000001682	194	140	167	174
ENSOCUG00000001683	2401	1894	1840	1931
ENSOCUG00000001684	1684	1292	1236	1307
ENSOCUG00000001685	6686	3746	2748	2452
ENSOCUG00000001686	1780	1582	1065	1341
ENSOCUG00000001687	5836	6571	7936	3476
ENSOCUG00000001688	0	0	2	0
ENSOCUG00000001689	32	11	14	10
ENSOCUG00000001691	3354	2033	1601	1858
ENSOCUG00000001692	2521	1943	1530	2016
ENSOCUG00000001693	1216	893	716	991
ENSOCUG00000001694	0	0	0	0
ENSOCUG00000001695	0	0	0	0
ENSOCUG00000001696	1153	919	942	1382
ENSOCUG00000001697	792	576	1064	1053
ENSOCUG00000001698	1315	963	917	1370
ENSOCUG00000001699	1055	892	810	853
ENSOCUG00000001700	0	0	0	0
ENSOCUG00000001701	146	198	144	170
ENSOCUG00000001702	0	0	0	2
ENSOCUG00000001703	14	0	6	40
ENSOCUG00000001704	18	14	2	16
ENSOCUG00000001710	1454	704	774	914
ENSOCUG00000001711	698	569	406	457
ENSOCUG00000001712	976	775	623	773
ENSOCUG00000001714	2	0	0	0
ENSOCUG00000001715	151	108	104	157
ENSOCUG00000001716	13	22	9	4
ENSOCUG00000001717	36	12	22	15
ENSOCUG00000001718	6028	4538	3468	6389
ENSOCUG00000001719	512	490	497	348
ENSOCUG00000001720	0	0	0	0
ENSOCUG00000001722	0	0	0	0
ENSOCUG00000001723	26	46	50	42
ENSOCUG00000001724	309	238	282	414
ENSOCUG00000001725	12664	14767	10008	10594
ENSOCUG00000001726	111	351	158	110
ENSOCUG00000001727	716	1071	620	397
ENSOCUG00000001729	3308	3508	2415	3472
ENSOCUG00000001730	2510	1422	1336	1605
ENSOCUG00000001732	906	662	681	1066
ENSOCUG00000001734	1321	1638	1144	1657
ENSOCUG00000001735	14002	14279	9785	9530
ENSOCUG00000001736	1174	1282	984	688
ENSOCUG00000001738	480	403	405	461
ENSOCUG00000001739	8	0	2	7
ENSOCUG00000001741	727	549	440	544
ENSOCUG00000001742	738	560	584	632
ENSOCUG00000001746	2	6	4	1
ENSOCUG00000001748	829	586	639	693
ENSOCUG00000001750	214	397	216	216
ENSOCUG00000001751	5099	8977	8433	6503
ENSOCUG00000001752	96	102	198	70
ENSOCUG00000001753	5315	2983	2744	3298
ENSOCUG00000001754	3105	2533	1697	1794
ENSOCUG00000001757	4	19	4	6
ENSOCUG00000001758	2272	1683	2041	2806
ENSOCUG00000001759	74	27	44	36
ENSOCUG00000001761	16	21	22	20
ENSOCUG00000001764	614	521	600	848
ENSOCUG00000001765	547	779	369	398
ENSOCUG00000001766	86	18	8	24
ENSOCUG00000001767	305	297	201	370
ENSOCUG00000001768	3118	2686	2450	3574
ENSOCUG00000001769	2	4	0	6
ENSOCUG00000001770	1	0	0	0
ENSOCUG00000001772	5876	4645	4424	5124
ENSOCUG00000001774	2	4	2	4
ENSOCUG00000001776	1161	628	458	709
ENSOCUG00000001777	906	555	591	945
ENSOCUG00000001779	898	603	511	722
ENSOCUG00000001780	0	0	0	0
ENSOCUG00000001781	314	186	151	168
ENSOCUG00000001782	2861	3119	2153	2449
ENSOCUG00000001783	441	329	319	258
ENSOCUG00000001784	4108	3307	4288	4464
ENSOCUG00000001785	12	2	2	8
ENSOCUG00000001786	1028	736	706	907
ENSOCUG00000001787	2739	2434	1667	1639
ENSOCUG00000001788	373	210	92	96
ENSOCUG00000001789	405	385	258	346
ENSOCUG00000001790	2276	1743	1466	1492
ENSOCUG00000001791	78	204	268	162
ENSOCUG00000001792	0	2	0	0
ENSOCUG00000001793	0	0	0	0
ENSOCUG00000001794	0	0	0	0
ENSOCUG00000001798	5174	3805	4598	4723
ENSOCUG00000001799	6178	4123	3992	5438
ENSOCUG00000001801	959	1034	855	1384
ENSOCUG00000001802	1469	1842	1501	1176
ENSOCUG00000001803	342	341	334	391
ENSOCUG00000001804	693	572	609	826
ENSOCUG00000001806	230	136	130	212
ENSOCUG00000001807	1402	1437	1522	1698
ENSOCUG00000001808	2295	2111	2219	2105
ENSOCUG00000001810	5034	4222	3851	4182
ENSOCUG00000001811	0	2	0	2
ENSOCUG00000001812	307	284	230	297
ENSOCUG00000001813	109	31	69	44
ENSOCUG00000001814	2464	2675	1927	2531
ENSOCUG00000001816	261	292	212	285
ENSOCUG00000001817	2114	1502	1244	1843
ENSOCUG00000001818	3062	2242	2132	3252
ENSOCUG00000001819	377	294	219	361
ENSOCUG00000001820	5820	5342	4748	4428
ENSOCUG00000001821	5550	4604	4868	6617
ENSOCUG00000001822	0	2	6	0
ENSOCUG00000001823	93	92	75	36
ENSOCUG00000001824	1509	442	526	1050
ENSOCUG00000001825	638	632	626	838
ENSOCUG00000001826	159	119	108	88
ENSOCUG00000001827	2019	1664	1241	1650
ENSOCUG00000001828	3126	2702	1993	1440
ENSOCUG00000001829	3454	2873	1817	2035
ENSOCUG00000001830	38	36	18	25
ENSOCUG00000001831	4	12	2	4
ENSOCUG00000001832	1356	963	839	1102
ENSOCUG00000001833	737	1079	758	982
ENSOCUG00000001834	343	308	315	360
ENSOCUG00000001836	26	42	44	29
ENSOCUG00000001837	1774	1380	1104	1243
ENSOCUG00000001838	705	437	406	492
ENSOCUG00000001839	568	459	355	546
ENSOCUG00000001842	1627	2009	1680	2082
ENSOCUG00000001843	1558	1151	973	1757
ENSOCUG00000001844	263	341	338	131
ENSOCUG00000001847	32745	17787	16664	16150
ENSOCUG00000001849	1	0	0	2
ENSOCUG00000001850	2	2	0	2
ENSOCUG00000001851	2049	2262	1306	1040
ENSOCUG00000001853	771	158	373	268
ENSOCUG00000001854	0	0	0	0
ENSOCUG00000001855	70	37	59	33
ENSOCUG00000001856	15475	8996	4946	12477
ENSOCUG00000001857	234	158	188	272
ENSOCUG00000001858	38	8	18	8
ENSOCUG00000001859	1092	826	723	1080
ENSOCUG00000001860	6	8	0	4
ENSOCUG00000001861	2611	2420	2343	2723
ENSOCUG00000001863	2	6	2	0
ENSOCUG00000001864	12	6	10	6
ENSOCUG00000001866	0	0	0	0
ENSOCUG00000001867	18	45	11	26
ENSOCUG00000001868	1922	1551	1142	1574
ENSOCUG00000001869	0	0	0	0
ENSOCUG00000001870	86	164	116	172
ENSOCUG00000001871	0	0	0	0
ENSOCUG00000001873	519	500	309	224
ENSOCUG00000001874	1403	996	1067	1433
ENSOCUG00000001875	332	359	306	314
ENSOCUG00000001876	15	7	10	40
ENSOCUG00000001877	4005	2743	2375	3391
ENSOCUG00000001879	1147	790	581	953
ENSOCUG00000001880	1160	1065	947	1247
ENSOCUG00000001881	616	615	558	833
ENSOCUG00000001882	306	183	182	277
ENSOCUG00000001883	20	2	9	9
ENSOCUG00000001884	1498	1675	1285	1366
ENSOCUG00000001885	983	740	724	243
ENSOCUG00000001886	3762	3188	2396	2458
ENSOCUG00000001887	9252	10647	6392	7899
ENSOCUG00000001888	2305	1473	1569	1183
ENSOCUG00000001889	5598	6343	5407	8965
ENSOCUG00000001890	0	0	7	2
ENSOCUG00000001891	2	5	0	12
ENSOCUG00000001892	3754	3628	3858	5259
ENSOCUG00000001894	236	266	208	134
ENSOCUG00000001897	355	438	389	203
ENSOCUG00000001898	15	4	2	6
ENSOCUG00000001901	0	0	0	0
ENSOCUG00000001902	713	656	584	679
ENSOCUG00000001903	815	694	441	603
ENSOCUG00000001904	0	0	0	0
ENSOCUG00000001905	182	382	430	244
ENSOCUG00000001906	24	49	20	24
ENSOCUG00000001907	569	550	559	716
ENSOCUG00000001908	1365	785	660	669
ENSOCUG00000001909	0	0	0	0
ENSOCUG00000001910	567	446	318	556
ENSOCUG00000001911	981	1238	857	873
ENSOCUG00000001912	1112	1163	547	1474
ENSOCUG00000001913	212	303	127	118
ENSOCUG00000001914	2161	1965	1526	1369
ENSOCUG00000001915	2086	2158	1582	1230
ENSOCUG00000001916	0	0	0	0
ENSOCUG00000001918	4	6	10	0
ENSOCUG00000001919	1483	970	676	622
ENSOCUG00000001920	320	332	217	227
ENSOCUG00000001921	364	262	303	299
ENSOCUG00000001923	8936	5193	4848	4030
ENSOCUG00000001924	75	50	44	80
ENSOCUG00000001925	410	391	364	523
ENSOCUG00000001929	47	12	30	22
ENSOCUG00000001931	380	332	239	186
ENSOCUG00000001933	1974	986	636	1117
ENSOCUG00000001934	0	0	0	0
ENSOCUG00000001935	0	0	0	0
ENSOCUG00000001937	3830	3060	2266	2487
ENSOCUG00000001938	1409	1551	956	781
ENSOCUG00000001940	1000	495	409	664
ENSOCUG00000001941	146	81	88	73
ENSOCUG00000001943	2184	2070	2033	2406
ENSOCUG00000001944	0	8	2	6
ENSOCUG00000001945	4	0	0	0
ENSOCUG00000001946	0	0	0	0
ENSOCUG00000001949	1733	1524	1339	1366
ENSOCUG00000001950	0	0	0	0
ENSOCUG00000001951	344	308	266	464
ENSOCUG00000001952	4637	1704	1538	2859
ENSOCUG00000001953	2766	2008	1449	1512
ENSOCUG00000001954	8	28	22	20
ENSOCUG00000001955	0	0	0	2
ENSOCUG00000001956	1862	903	760	1242
ENSOCUG00000001957	608	419	362	546
ENSOCUG00000001961	220	84	80	105
ENSOCUG00000001962	18	22	28	20
ENSOCUG00000001963	19967	23961	9546	15875
ENSOCUG00000001964	1143	743	433	475
ENSOCUG00000001965	0	0	10	4
ENSOCUG00000001966	241	249	172	152
ENSOCUG00000001967	74	42	44	32
ENSOCUG00000001968	2	17	9	0
ENSOCUG00000001969	6	2	2	0
ENSOCUG00000001970	47	30	26	28
ENSOCUG00000001971	1743	1233	867	1262
ENSOCUG00000001972	4233	3946	3838	4430
ENSOCUG00000001973	20	8	6	12
ENSOCUG00000001975	192	138	159	113
ENSOCUG00000001978	2	2	0	0
ENSOCUG00000001979	1254	1188	933	1121
ENSOCUG00000001980	0	0	2	0
ENSOCUG00000001981	835	549	472	827
ENSOCUG00000001982	2807	2334	1873	2169
ENSOCUG00000001984	1339	784	510	651
ENSOCUG00000001985	606	276	187	240
ENSOCUG00000001986	26	16	9	11
ENSOCUG00000001987	0	0	2	5
ENSOCUG00000001988	0	0	0	0
ENSOCUG00000001989	0	0	0	0
ENSOCUG00000001990	1264	1151	939	1460
ENSOCUG00000001991	987	652	824	863
ENSOCUG00000001992	103	133	172	176
ENSOCUG00000001993	1656	490	704	854
ENSOCUG00000001994	376	253	294	343
ENSOCUG00000001995	4	20	8	4
ENSOCUG00000001996	562	354	386	268
ENSOCUG00000001998	839	852	537	611
ENSOCUG00000001999	346	245	239	224
ENSOCUG00000002000	1360	1415	960	1179
ENSOCUG00000002001	2609	2658	1932	2177
ENSOCUG00000002002	0	0	0	0
ENSOCUG00000002003	1066	903	715	696
ENSOCUG00000002004	2223	2113	1540	1714
ENSOCUG00000002006	3209	2516	1954	2325
ENSOCUG00000002007	1987	1538	1346	2039
ENSOCUG00000002008	410	415	223	263
ENSOCUG00000002009	4346	2902	2679	2112
ENSOCUG00000002011	587	415	447	604
ENSOCUG00000002013	1234	821	804	984
ENSOCUG00000002014	3595	2718	2165	3393
ENSOCUG00000002017	342	295	282	201
ENSOCUG00000002018	1119	467	379	505
ENSOCUG00000002019	0	0	0	0
ENSOCUG00000002020	6	6	6	6
ENSOCUG00000002021	509	553	414	351
ENSOCUG00000002022	4185	3482	2838	3588
ENSOCUG00000002023	941	722	567	772
ENSOCUG00000002024	2	0	0	0
ENSOCUG00000002025	1251	1010	957	1091
ENSOCUG00000002026	1560	2033	1646	1981
ENSOCUG00000002027	1463	1626	1011	977
ENSOCUG00000002028	30	14	12	12
ENSOCUG00000002029	0	0	0	0
ENSOCUG00000002030	0	0	2	0
ENSOCUG00000002031	1977	1653	1953	1655
ENSOCUG00000002032	319	134	102	259
ENSOCUG00000002033	419	375	302	383
ENSOCUG00000002037	1694	1393	1007	1509
ENSOCUG00000002038	77	63	54	62
ENSOCUG00000002039	0	0	2	0
ENSOCUG00000002040	0	0	0	0
ENSOCUG00000002041	6270	5696	4196	3373
ENSOCUG00000002042	274	159	172	187
ENSOCUG00000002043	4428	3963	3646	3214
ENSOCUG00000002047	0	4	1	0
ENSOCUG00000002050	563	380	372	626
ENSOCUG00000002051	48	14	54	4
ENSOCUG00000002052	3302	1405	997	1480
ENSOCUG00000002053	2736	2092	2092	2891
ENSOCUG00000002054	273	139	158	176
ENSOCUG00000002055	1345	1302	746	998
ENSOCUG00000002056	10	7	0	3
ENSOCUG00000002057	209	77	78	102
ENSOCUG00000002058	0	0	0	0
ENSOCUG00000002059	1984	1716	1549	2031
ENSOCUG00000002060	3124	2133	2319	3091
ENSOCUG00000002061	0	0	0	2
ENSOCUG00000002062	0	0	0	4
ENSOCUG00000002063	9504	6286	4599	6397
ENSOCUG00000002064	3	4	2	4
ENSOCUG00000002065	1464	1625	1312	1357
ENSOCUG00000002066	456	589	352	353
ENSOCUG00000002067	0	0	0	0
ENSOCUG00000002069	8	8	2	2
ENSOCUG00000002071	1878	1762	1283	1532
ENSOCUG00000002072	1023	732	575	614
ENSOCUG00000002073	1900	1741	1149	906
ENSOCUG00000002074	11448	11953	9559	9818
ENSOCUG00000002075	4390	3488	2826	2898
ENSOCUG00000002076	1356	1280	742	900
ENSOCUG00000002078	0	0	0	0
ENSOCUG00000002080	701	416	326	338
ENSOCUG00000002083	14	26	2	25
ENSOCUG00000002084	2143	1933	2505	2016
ENSOCUG00000002085	472	223	177	198
ENSOCUG00000002086	568	453	306	308
ENSOCUG00000002089	0	0	0	0
ENSOCUG00000002090	2081	1484	1003	1245
ENSOCUG00000002093	367	312	251	166
ENSOCUG00000002094	1908	1738	1256	1738
ENSOCUG00000002095	4396	3460	3604	2620
ENSOCUG00000002097	0	0	0	0
ENSOCUG00000002098	210	291	157	135
ENSOCUG00000002099	1286	1071	724	1013
ENSOCUG00000002100	3808	3327	3562	4333
ENSOCUG00000002102	1804	1385	1074	1406
ENSOCUG00000002103	14	15	8	10
ENSOCUG00000002104	0	0	0	0
ENSOCUG00000002105	879	447	267	477
ENSOCUG00000002106	869	577	580	628
ENSOCUG00000002107	18508	19087	15908	21718
ENSOCUG00000002108	260	235	179	96
ENSOCUG00000002109	1407	1552	2789	1791
ENSOCUG00000002110	980	1205	877	576
ENSOCUG00000002111	0	0	0	0
ENSOCUG00000002112	41	23	20	8
ENSOCUG00000002114	1608	1293	1072	1427
ENSOCUG00000002115	877	1054	934	1011
ENSOCUG00000002117	192	271	155	186
ENSOCUG00000002118	82	88	77	134
ENSOCUG00000002119	1894	965	1447	1583
ENSOCUG00000002120	4387	2882	2275	3344
ENSOCUG00000002121	2843	2538	1718	1783
ENSOCUG00000002122	1867	1629	1666	1079
ENSOCUG00000002123	10	11	4	16
ENSOCUG00000002125	0	2	0	0
ENSOCUG00000002126	224	311	180	173
ENSOCUG00000002127	412	282	284	394
ENSOCUG00000002128	154	230	162	164
ENSOCUG00000002129	13710	9187	9849	9062
ENSOCUG00000002131	1400	843	1082	627
ENSOCUG00000002132	1379	1030	748	975
ENSOCUG00000002134	12349	10778	8298	8407
ENSOCUG00000002135	1096	852	733	699
ENSOCUG00000002137	5588	5565	5582	7619
ENSOCUG00000002138	0	0	0	0
ENSOCUG00000002139	605	240	298	308
ENSOCUG00000002140	32	20	54	24
ENSOCUG00000002141	0	0	0	0
ENSOCUG00000002142	2	0	6	8
ENSOCUG00000002143	709	563	684	763
ENSOCUG00000002144	126	65	72	60
ENSOCUG00000002145	261	187	138	186
ENSOCUG00000002146	2	0	0	0
ENSOCUG00000002147	786	727	448	418
ENSOCUG00000002148	2743	2322	1924	2893
ENSOCUG00000002149	1225	939	800	1048
ENSOCUG00000002150	23456	25735	17469	17022
ENSOCUG00000002151	1207	798	674	874
ENSOCUG00000002152	202	178	144	230
ENSOCUG00000002153	782	764	540	744
ENSOCUG00000002154	2461	1737	2219	2399
ENSOCUG00000002155	5974	4965	3507	3476
ENSOCUG00000002156	1297	718	568	1096
ENSOCUG00000002157	3758	3524	2548	4063
ENSOCUG00000002158	827	522	364	443
ENSOCUG00000002159	1511	1142	1046	1918
ENSOCUG00000002160	715	711	497	873
ENSOCUG00000002161	224	178	164	266
ENSOCUG00000002163	1122	943	762	843
ENSOCUG00000002165	1231	1319	853	945
ENSOCUG00000002166	1921	1785	1340	1534
ENSOCUG00000002167	1236	938	895	1305
ENSOCUG00000002171	202	180	144	232
ENSOCUG00000002172	1619	1472	1105	731
ENSOCUG00000002173	1003	1085	786	693
ENSOCUG00000002174	82	110	40	130
ENSOCUG00000002176	1553	1213	792	1268
ENSOCUG00000002177	273	548	303	162
ENSOCUG00000002178	414	290	297	165
ENSOCUG00000002179	372	380	241	134
ENSOCUG00000002180	916	926	501	738
ENSOCUG00000002181	1543	1217	886	980
ENSOCUG00000002182	92	92	75	87
ENSOCUG00000002183	2172	1947	1280	1242
ENSOCUG00000002185	0	0	0	0
ENSOCUG00000002186	256	183	165	189
ENSOCUG00000002187	35450	26293	21151	24787
ENSOCUG00000002188	7676	7446	6270	5320
ENSOCUG00000002189	90	108	86	98
ENSOCUG00000002190	1003	470	365	791
ENSOCUG00000002192	257	162	162	228
ENSOCUG00000002193	2026	1457	1256	1589
ENSOCUG00000002194	2730	1747	1502	1811
ENSOCUG00000002195	0	0	0	0
ENSOCUG00000002196	0	0	0	0
ENSOCUG00000002197	297	361	248	314
ENSOCUG00000002198	379	364	282	392
ENSOCUG00000002199	38	29	33	18
ENSOCUG00000002200	471	558	437	146
ENSOCUG00000002202	613	399	337	569
ENSOCUG00000002203	310	258	544	168
ENSOCUG00000002204	0	18	2	4
ENSOCUG00000002205	1210	664	540	430
ENSOCUG00000002206	101	132	85	108
ENSOCUG00000002207	131	126	82	81
ENSOCUG00000002208	0	0	0	0
ENSOCUG00000002210	181	217	147	103
ENSOCUG00000002211	16	2	15	6
ENSOCUG00000002212	1181	842	841	1326
ENSOCUG00000002214	3897	2661	2751	3500
ENSOCUG00000002215	4	0	2	1
ENSOCUG00000002216	4507	1612	2276	3380
ENSOCUG00000002217	1469	980	942	1483
ENSOCUG00000002218	453	363	346	265
ENSOCUG00000002219	380	353	258	226
ENSOCUG00000002220	8179	4870	4501	4963
ENSOCUG00000002222	2	0	2	2
ENSOCUG00000002223	166	203	147	79
ENSOCUG00000002224	3651	2251	2993	4493
ENSOCUG00000002225	3340	2218	1978	3021
ENSOCUG00000002226	812	715	625	1032
ENSOCUG00000002230	26137	25646	17937	19960
ENSOCUG00000002231	9819	2901	3059	3430
ENSOCUG00000002232	0	0	0	0
ENSOCUG00000002233	35	28	21	18
ENSOCUG00000002235	2505	1418	1244	2029
ENSOCUG00000002236	3504	2541	2108	2433
ENSOCUG00000002237	0	0	0	0
ENSOCUG00000002238	2119	2704	1835	1308
ENSOCUG00000002240	496	443	385	433
ENSOCUG00000002241	1980	1643	1018	1351
ENSOCUG00000002242	192	87	117	108
ENSOCUG00000002243	1498	1825	1398	2220
ENSOCUG00000002244	261	474	316	490
ENSOCUG00000002245	1227	913	632	984
ENSOCUG00000002246	1718	1678	1257	1566
ENSOCUG00000002248	2427	1948	1471	1700
ENSOCUG00000002249	13226	6805	7086	8769
ENSOCUG00000002250	691	1377	566	539
ENSOCUG00000002251	2800	1886	1432	1532
ENSOCUG00000002253	8123	5379	4436	4981
ENSOCUG00000002254	918	800	622	666
ENSOCUG00000002256	16	18	26	36
ENSOCUG00000002258	578	288	213	437
ENSOCUG00000002259	2699	2959	2409	2365
ENSOCUG00000002260	723	919	492	720
ENSOCUG00000002261	10	0	8	4
ENSOCUG00000002263	1026	1106	575	771
ENSOCUG00000002264	1344	523	298	738
ENSOCUG00000002266	31	31	23	19
ENSOCUG00000002267	1837	1365	1195	1147
ENSOCUG00000002269	271	144	107	207
ENSOCUG00000002271	6001	5425	3122	3135
ENSOCUG00000002272	0	22	2	2
ENSOCUG00000002274	221	140	178	96
ENSOCUG00000002278	770	621	447	503
ENSOCUG00000002279	665	308	266	158
ENSOCUG00000002281	98	81	42	49
ENSOCUG00000002283	24	16	26	14
ENSOCUG00000002284	86	125	68	38
ENSOCUG00000002285	38	22	28	25
ENSOCUG00000002287	556	707	521	279
ENSOCUG00000002289	7594	6294	6228	4755
ENSOCUG00000002290	2296	2238	1608	1941
ENSOCUG00000002291	4	6	10	8
ENSOCUG00000002292	3288	2666	1902	2123
ENSOCUG00000002295	2852	2718	1852	2114
ENSOCUG00000002296	732	685	499	807
ENSOCUG00000002297	3	0	0	4
ENSOCUG00000002298	2347	1513	1277	1628
ENSOCUG00000002299	1217	1013	775	1024
ENSOCUG00000002300	1353	1142	833	900
ENSOCUG00000002301	131	164	153	198
ENSOCUG00000002302	1346	1003	742	1085
ENSOCUG00000002303	1084	654	679	1033
ENSOCUG00000002304	3217	2013	1294	1980
ENSOCUG00000002305	2	0	0	0
ENSOCUG00000002306	0	0	2	0
ENSOCUG00000002309	1008	892	609	446
ENSOCUG00000002310	473	298	295	309
ENSOCUG00000002311	97	253	97	41
ENSOCUG00000002312	4733	3229	2288	2406
ENSOCUG00000002313	111	81	83	112
ENSOCUG00000002314	0	0	0	0
ENSOCUG00000002315	633	496	332	426
ENSOCUG00000002316	1443	1253	926	1097
ENSOCUG00000002317	2	0	0	0
ENSOCUG00000002318	334	288	139	212
ENSOCUG00000002319	188	70	108	92
ENSOCUG00000002320	2239	2486	1627	1414
ENSOCUG00000002322	2230	1749	1372	2038
ENSOCUG00000002323	988	1035	666	893
ENSOCUG00000002324	2883	3201	1889	1694
ENSOCUG00000002325	1116	745	466	545
ENSOCUG00000002326	609	500	432	619
ENSOCUG00000002331	0	0	0	0
ENSOCUG00000002332	1037	1077	572	839
ENSOCUG00000002333	9	0	2	0
ENSOCUG00000002334	891	1195	1175	1345
ENSOCUG00000002335	0	2	2	4
ENSOCUG00000002336	663	1220	1554	1219
ENSOCUG00000002337	272	109	166	144
ENSOCUG00000002338	899	243	283	248
ENSOCUG00000002339	740	609	748	755
ENSOCUG00000002341	34446	21902	16368	16570
ENSOCUG00000002342	39	31	18	5
ENSOCUG00000002344	1273	2952	1329	1485
ENSOCUG00000002345	0	0	0	4
ENSOCUG00000002346	348	244	156	106
ENSOCUG00000002349	30	40	16	20
ENSOCUG00000002350	659	533	422	618
ENSOCUG00000002352	2286	1708	1355	1034
ENSOCUG00000002353	1408	1464	1079	1076
ENSOCUG00000002356	66	53	28	22
ENSOCUG00000002357	17	59	18	16
ENSOCUG00000002358	7230	3681	2975	3510
ENSOCUG00000002359	275	279	171	146
ENSOCUG00000002360	2648	2498	1857	1697
ENSOCUG00000002361	3637	3164	2766	2939
ENSOCUG00000002362	1080	915	834	1036
ENSOCUG00000002363	509	334	269	364
ENSOCUG00000002364	144	20	28	34
ENSOCUG00000002365	0	0	0	0
ENSOCUG00000002366	4	2	2	2
ENSOCUG00000002367	21	8	2	1
ENSOCUG00000002368	1336	898	827	1005
ENSOCUG00000002369	70	34	36	30
ENSOCUG00000002371	44	27	32	14
ENSOCUG00000002372	3571	4444	3827	5756
ENSOCUG00000002373	0	0	0	2
ENSOCUG00000002375	3472	2097	1801	2629
ENSOCUG00000002376	118	91	84	57
ENSOCUG00000002378	1179	1181	1104	905
ENSOCUG00000002379	436	661	421	359
ENSOCUG00000002380	1932	2032	1384	1877
ENSOCUG00000002381	136	60	78	87
ENSOCUG00000002382	244	140	116	261
ENSOCUG00000002383	2799	2161	2566	2878
ENSOCUG00000002384	102	97	170	154
ENSOCUG00000002386	797	646	453	522
ENSOCUG00000002387	1045	786	662	713
ENSOCUG00000002389	3632	2763	2340	2929
ENSOCUG00000002390	1053	795	622	1003
ENSOCUG00000002391	1325	1258	1186	1221
ENSOCUG00000002392	23611	26558	24081	25314
ENSOCUG00000002393	358	287	218	199
ENSOCUG00000002394	6932	5628	4014	5115
ENSOCUG00000002395	1478	1321	1005	1160
ENSOCUG00000002396	8152	7711	10138	12159
ENSOCUG00000002397	4512	2825	2490	3365
ENSOCUG00000002398	2196	1815	1005	980
ENSOCUG00000002399	106	165	67	138
ENSOCUG00000002400	0	0	0	0
ENSOCUG00000002401	4	6	0	0
ENSOCUG00000002402	6	4	0	2
ENSOCUG00000002403	765	1052	703	482
ENSOCUG00000002404	0	1	0	2
ENSOCUG00000002406	1825	1247	990	1844
ENSOCUG00000002407	14472	19272	22766	24758
ENSOCUG00000002408	48	98	106	84
ENSOCUG00000002409	530	576	253	512
ENSOCUG00000002410	1120	1457	1039	701
ENSOCUG00000002411	172	88	144	160
ENSOCUG00000002412	0	0	0	0
ENSOCUG00000002413	42	35	39	59
ENSOCUG00000002414	2563	1323	1136	1881
ENSOCUG00000002417	1918	1525	1123	1399
ENSOCUG00000002418	431	363	375	422
ENSOCUG00000002419	12810	10531	6800	9794
ENSOCUG00000002420	0	0	2	2
ENSOCUG00000002421	2042	2070	1408	1366
ENSOCUG00000002424	16470	8928	63798	11325
ENSOCUG00000002425	537	1553	564	845
ENSOCUG00000002426	26	22	26	20
ENSOCUG00000002427	27	44	33	45
ENSOCUG00000002428	440	410	373	349
ENSOCUG00000002429	7389	5759	4458	4961
ENSOCUG00000002431	8	23	8	6
ENSOCUG00000002432	4531	3869	4120	4960
ENSOCUG00000002433	2	0	0	0
ENSOCUG00000002434	548	419	272	389
ENSOCUG00000002435	600	889	621	500
ENSOCUG00000002436	463	390	445	397
ENSOCUG00000002437	414	429	301	297
ENSOCUG00000002438	592	506	399	573
ENSOCUG00000002439	2065	2020	2077	2593
ENSOCUG00000002440	6	9	8	2
ENSOCUG00000002441	2204	1704	1595	1664
ENSOCUG00000002442	1478	1416	969	1134
ENSOCUG00000002443	0	0	2	2
ENSOCUG00000002444	10	6	5	5
ENSOCUG00000002445	7942	6505	5397	8636
ENSOCUG00000002447	173	216	156	217
ENSOCUG00000002448	4241	3800	3458	3466
ENSOCUG00000002449	2024	1507	1248	1327
ENSOCUG00000002450	2	0	0	0
ENSOCUG00000002451	6891	4695	3839	5132
ENSOCUG00000002452	0	0	0	1
ENSOCUG00000002453	0	0	0	0
ENSOCUG00000002455	7486	4407	4474	7294
ENSOCUG00000002456	1813	1494	1079	1975
ENSOCUG00000002457	23	20	22	6
ENSOCUG00000002458	593	552	388	581
ENSOCUG00000002461	4325	3550	3976	5263
ENSOCUG00000002462	0	2	0	0
ENSOCUG00000002463	2630	2389	2139	2036
ENSOCUG00000002464	986	636	711	655
ENSOCUG00000002466	137	140	145	188
ENSOCUG00000002467	2	2	8	0
ENSOCUG00000002468	572	295	580	532
ENSOCUG00000002470	3476	3124	2085	2641
ENSOCUG00000002473	433	339	372	208
ENSOCUG00000002474	0	0	0	0
ENSOCUG00000002476	953	783	602	920
ENSOCUG00000002477	0	10	2	0
ENSOCUG00000002478	30	73	41	16
ENSOCUG00000002480	43765	13127	22535	26018
ENSOCUG00000002481	105	58	319	114
ENSOCUG00000002482	0	0	2	2
ENSOCUG00000002483	49	39	27	38
ENSOCUG00000002484	626	833	583	271
ENSOCUG00000002485	31063	6805	21362	14361
ENSOCUG00000002486	16	2	16	2
ENSOCUG00000002487	0	0	0	0
ENSOCUG00000002488	0	0	0	0
ENSOCUG00000002489	449	445	461	228
ENSOCUG00000002490	0	0	0	0
ENSOCUG00000002492	6680	4534	4209	4895
ENSOCUG00000002494	1023	1058	1111	1072
ENSOCUG00000002495	1814	1167	942	1411
ENSOCUG00000002496	1114	704	739	537
ENSOCUG00000002497	826	390	383	615
ENSOCUG00000002498	888	730	415	615
ENSOCUG00000002500	0	0	0	0
ENSOCUG00000002503	103	60	59	109
ENSOCUG00000002504	126	94	71	152
ENSOCUG00000002505	4190	3453	4095	5088
ENSOCUG00000002506	29617	30570	24632	26453
ENSOCUG00000002507	6	17	3	4
ENSOCUG00000002508	0	0	0	0
ENSOCUG00000002509	916	536	559	758
ENSOCUG00000002510	0	2	0	2
ENSOCUG00000002512	3967	2811	2336	3406
ENSOCUG00000002513	0	0	0	0
ENSOCUG00000002515	0	2	4	2
ENSOCUG00000002516	0	0	0	0
ENSOCUG00000002518	1653	1264	927	1227
ENSOCUG00000002519	2788	1367	1828	1765
ENSOCUG00000002522	472	294	898	384
ENSOCUG00000002523	974	715	672	874
ENSOCUG00000002528	2457	1882	1580	1288
ENSOCUG00000002529	6	2	0	4
ENSOCUG00000002530	1610	1593	1141	1046
ENSOCUG00000002533	4213	3658	3409	4249
ENSOCUG00000002535	50	93	71	80
ENSOCUG00000002536	888	556	488	921
ENSOCUG00000002537	991	1110	1114	1512
ENSOCUG00000002539	28	8	8	14
ENSOCUG00000002541	5877	3680	3289	4270
ENSOCUG00000002542	2	0	14	2
ENSOCUG00000002543	3304	3066	2273	3227
ENSOCUG00000002546	0	0	0	0
ENSOCUG00000002548	12	22	12	14
ENSOCUG00000002549	20764	14801	11714	14195
ENSOCUG00000002551	440	350	370	547
ENSOCUG00000002552	0	0	0	0
ENSOCUG00000002553	3854	2161	2851	5105
ENSOCUG00000002554	1155	801	806	1060
ENSOCUG00000002555	4079	2618	2257	2725
ENSOCUG00000002556	2976	2767	2009	1495
ENSOCUG00000002557	12	2	16	296
ENSOCUG00000002559	390	260	368	332
ENSOCUG00000002562	3168	5821	4799	3593
ENSOCUG00000002563	339	308	263	201
ENSOCUG00000002565	39	22	10	17
ENSOCUG00000002566	4	0	0	0
ENSOCUG00000002567	0	0	2	0
ENSOCUG00000002569	5	8	2	2
ENSOCUG00000002571	0	0	0	0
ENSOCUG00000002572	203	225	191	185
ENSOCUG00000002573	2782	1943	1472	2338
ENSOCUG00000002574	1588	1975	2580	1686
ENSOCUG00000002575	0	0	0	0
ENSOCUG00000002576	74	63	69	93
ENSOCUG00000002577	449	320	332	541
ENSOCUG00000002580	137	252	125	137
ENSOCUG00000002581	2938	1938	1685	3094
ENSOCUG00000002582	887	906	615	706
ENSOCUG00000002583	1964	2066	1605	2018
ENSOCUG00000002584	44	111	107	21
[truncated: 21,671 more rows]
