# Supplementary material for: Transcriptomics as Precision Medicine to Classify <em>In Vivo</em> Models of Dietary-Induced Atherosclerosis at Cellular and Molecular Levels
Source: Preprints.org preprint supplement (doi:10.20944/preprints201809.0082.v1), 2018-09-05
Supplement: Supplementary file 21 [file Supplemental_Table_6.xlsx]

## Sheet: Biological_process
TermID	Term	P	Q	k	n	Query set	Gene symbols
GO:0044267	cellular protein metabolic process	3.01e-26	2.82e-22	538	3594	Common	1500015O10Rik,Aars,Abca1,Abhd12,Abhd13,Abhd17b,Abraxas2,Acvr1b,Acvr2a,Adam10,Adh5,Adprh,Afg3l1,Agap3,Agbl5,Agtpbp1,Anapc10,Aph1a,App,Arid4a,Arrb1,Arrdc4,Asb2,Ash1l,Ate1,Atg16l1,Atg5,Atg7,Atm,Atp7a,Atr,Axin1,B4galt1,B4gat1,Bag6,Baz2a,Bgn,Bmi1,Braf,Brd4,Brpf1,Btg1,Btg2,Btk,Btrc,C1galt1c1,Camk1,Camk2d,Camk2g,Carm1,Cbx4,Ccdc47,Cdk2,Cdk4,Cdk5,Cdkal1,Cfl1,Chfr,Chuk,Clk1,Clk2,Clk3,Clk4,Cln8,Clock,Crtap,…
GO:0019538	protein metabolic process	3.46e-23	1.62e-19	627	3594	Common	1500015O10Rik,Aars,Abca1,Abhd12,Abhd13,Abhd17b,Abraxas2,Acan,Acvr1b,Acvr2a,Adam10,Adam17,Adam19,Adam9,Adamts2,Adamts7,Adamts9,Add1,Adh5,Adprh,Afg3l1,Aga,Agap3,Agbl5,Agtpbp1,Anapc10,Aph1a,App,Arid4a,Arrb1,Arrdc4,Asb2,Ash1l,Ate1,Atg16l1,Atg5,Atg7,Atm,Atp7a,Atr,Axin1,B4galt1,B4gat1,Bace1,Bag6,Baz2a,Bgn,Bmi1,Braf,Brd4,Brpf1,Btg1,Btg2,Btk,Btrc,C1galt1c1,C1qa,C2cd3,C3,C4b,Camk1,Camk2d,Camk2g,Capn1,Capn…
GO:0044260	cellular macromolecule metabolic process	8.03e-21	2.51e-17	741	3594	Common	1500015O10Rik,Aars,Abca1,Abhd12,Abhd13,Abhd17b,Abraxas2,Acadm,Acan,Acvr1b,Acvr2a,Adam10,Add1,Adh5,Adprh,Aff1,Afg3l1,Agap3,Agbl5,Agl,Agtpbp1,Ahr,Als2,Anapc10,Aoah,Ap2b1,Apbb1,Aph1a,App,Arid4a,Arrb1,Arrdc4,Asb2,Ash1l,Atad5,Ate1,Atg16l1,Atg5,Atg7,Atm,Atp7a,Atr,Atrx,Auh,Axin1,B4galt1,B4gat1,Bag6,Banf1,Baz2a,Bgn,Bmi1,Braf,Brca2,Brd4,Brpf1,Btg1,Btg2,Btk,Btrc,C1galt1c1,Calcoco1,Camk1,Camk2d,Camk2g,Caml,…
GO:0043170	macromolecule metabolic process	1.49e-20	3.5e-17	856	3594	Common	1500015O10Rik,Aars,Abca1,Abhd12,Abhd13,Abhd17b,Abraxas2,Acadm,Acan,Acvr1b,Acvr2a,Adam10,Adam17,Adam19,Adam9,Adamts2,Adamts7,Adamts9,Adar,Adarb1,Add1,Adh5,Adprh,Aff1,Afg3l1,Aga,Agap3,Agbl5,Agl,Ago1,Ago2,Ago4,Agtpbp1,Ahcyl1,Ahr,Als2,Anapc10,Aoah,Ap2b1,Apbb1,Aph1a,App,Arid4a,Arrb1,Arrdc4,Asb2,Ash1l,Atad5,Ate1,Atg16l1,Atg5,Atg7,Atm,Atp7a,Atr,Atrx,Auh,Axin1,B4galt1,B4gat1,Bace1,Bag6,Banf1,Baz2a,Bgn,Bm…
GO:1901564	organonitrogen compound metabolic process	7.21e-19	1.35e-15	785	3594	Common	1500015O10Rik,Aars,Aasdh,Abca1,Abhd12,Abhd13,Abhd17b,Abhd4,Abraxas2,Acaca,Acacb,Acadl,Acadm,Acan,Acot9,Acss1,Acss2,Acvr1b,Acvr2a,Adam10,Adam17,Adam19,Adam9,Adamts2,Adamts7,Adamts9,Adcy3,Adcy4,Adcy5,Adcy6,Adcy7,Adcy9,Add1,Adh5,Adk,Adprh,Adss,Afg3l1,Aga,Agap3,Agbl5,Agk,Agtpbp1,Aldh18a1,Aldh9a1,Amd1,Ampd2,Anapc10,Aph1a,App,Arid4a,Arrb1,Arrdc4,Asb2,Ash1l,Asl,Ate1,Atg16l1,Atg5,Atg7,Atm,Atp7a,Atr,Axin1…
GO:0051248	negative regulation of protein metabolic process	6.35e-17	7.88e-14	219	3594	Common	3110043O21Rik,Aatf,Adar,Adipoq,Aida,Ankrd26,Anks1,Anxa2,Apbb1,Apc,Apod,Arrb1,Arrb2,Ash1l,Atf3,Atg14,Atg5,Atg7,Axin1,Bag1,Bag6,Banp,Bcl3,Bin1,Casp3,Cav1,Cd109,Cd276,Cd59a,Cdk5,Cdkn1a,Cdkn1b,Cdkn2c,Cdyl,Cflar,Chordc1,Cib1,Clec16a,Cln3,Cnksr3,Cnot6l,Cpeb1,Cpeb2,Crebbp,Ctdsp1,Ctdsp2,Ctsa,Dab2ip,Dact1,Dmd,Dnajc3,Dusp16,Dusp6,Efna1,Eif2ak1,Eif2ak3,Eif2ak4,Eif2s1,Eif4e,Eif4ebp1,Eif4ebp2,Eif4enif1,Eprs,E…
GO:0006807	nitrogen compound metabolic process	6.48e-17	7.88e-14	993	3594	Common	1500015O10Rik,Aars,Aasdh,Abca1,Abhd12,Abhd13,Abhd17b,Abhd4,Abraxas2,Acaca,Acacb,Acadl,Acadm,Acan,Acot9,Acss1,Acss2,Acvr1b,Acvr2a,Adam10,Adam17,Adam19,Adam9,Adamts2,Adamts7,Adamts9,Adar,Adarb1,Adcy3,Adcy4,Adcy5,Adcy6,Adcy7,Adcy9,Add1,Adh5,Adk,Adprh,Adss,Aff1,Afg3l1,Aga,Agap3,Agbl5,Agk,Ago1,Ago2,Ago4,Agtpbp1,Ahcyl1,Ahr,Aldh18a1,Aldh9a1,Amd1,Ampd2,Anapc10,Apbb1,Aph1a,App,Arid4a,Arid5b,Arrb1,Arrdc4,A…
GO:0006464	cellular protein modification process	8.21e-17	7.88e-14	447	3594	Common	Abca1,Abhd12,Abhd13,Abhd17b,Abraxas2,Acvr1b,Acvr2a,Adam10,Adh5,Adprh,Agbl5,Agtpbp1,App,Arid4a,Arrdc4,Asb2,Ash1l,Ate1,Atg16l1,Atg5,Atg7,Atm,Atp7a,Atr,Axin1,B4galt1,B4gat1,Baz2a,Bgn,Bmi1,Braf,Brd4,Brpf1,Btg1,Btg2,Btk,Btrc,C1galt1c1,Camk1,Camk2d,Camk2g,Carm1,Cbx4,Cdk2,Cdk4,Cdk5,Cfl1,Chfr,Chuk,Clk1,Clk2,Clk3,Clk4,Clock,Crtap,Csf1r,Csk,Csnk1a1,Csnk1d,Csnk1e,Ctdspl2,Ctr9,Cttnbp2nl,Cyld,Dab2,Dab2ip,Dapk…
GO:0036211	protein modification process	8.21e-17	7.88e-14	447	3594	Common	Abca1,Abhd12,Abhd13,Abhd17b,Abraxas2,Acvr1b,Acvr2a,Adam10,Adh5,Adprh,Agbl5,Agtpbp1,App,Arid4a,Arrdc4,Asb2,Ash1l,Ate1,Atg16l1,Atg5,Atg7,Atm,Atp7a,Atr,Axin1,B4galt1,B4gat1,Baz2a,Bgn,Bmi1,Braf,Brd4,Brpf1,Btg1,Btg2,Btk,Btrc,C1galt1c1,Camk1,Camk2d,Camk2g,Carm1,Cbx4,Cdk2,Cdk4,Cdk5,Cfl1,Chfr,Chuk,Clk1,Clk2,Clk3,Clk4,Clock,Crtap,Csf1r,Csk,Csnk1a1,Csnk1d,Csnk1e,Ctdspl2,Ctr9,Cttnbp2nl,Cyld,Dab2,Dab2ip,Dapk…
GO:0051246	regulation of protein metabolic process	8.42e-17	7.88e-14	546	3594	Common	3110043O21Rik,Aars,Aatf,Ace,Aco1,Acvr1,Adam8,Adam9,Adar,Adipoq,Aida,Ajuba,Ankrd26,Ankrd54,Anks1,Antxr1,Anxa2,Apaf1,Apbb1,Apc,Apod,App,Arid5a,Arnt,Arrb1,Arrb2,Ash1l,Asxl2,Atf3,Atg14,Atg5,Atg7,Atp13a2,Atp6ap1,Axin1,Bad,Bag1,Bag6,Bak1,Banp,Bax,Bcar3,Bcl10,Bcl3,Bdnf,Bid,Bin1,Bmp4,Bmp6,Bnip2,Bok,Braf,Btrc,C1qtnf1,C1qtnf2,C2cd3,C3,Cab39,Casp3,Casp8,Casp8ap2,Casp9,Cav1,Cavin3,Cblb,Ccdc88a,Ccnyl1,Cd109,C…
GO:0044237	cellular metabolic process	1.95e-16	1.66e-13	1103	3594	Common	1500015O10Rik,Aars,Aasdh,Abca1,Abcd1,Abhd12,Abhd13,Abhd16a,Abhd17b,Abhd4,Abraxas2,Acaa1a,Acaca,Acacb,Acadl,Acadm,Acadvl,Acan,Acot7,Acot9,Acox1,Acox3,Acss1,Acss2,Acvr1b,Acvr2a,Adam10,Adar,Adarb1,Adcy3,Adcy4,Adcy5,Adcy6,Adcy7,Adcy9,Add1,Adgrf5,Adh1,Adh5,Adipoq,Adk,Adprh,Adss,Aff1,Afg3l1,Agap3,Agbl5,Agk,Agl,Ago1,Ago2,Ago4,Agpat1,Agpat5,Agtpbp1,Ahcyl1,Ahr,Ajuba,Akr1a1,Aldh18a1,Aldh1a1,Aldh1a3,Aldh9a1…
GO:0032269	negative regulation of cellular protein metabolic process	3.02e-16	2.36e-13	201	3594	Common	3110043O21Rik,Adar,Adipoq,Aida,Ankrd26,Anks1,Anxa2,Apc,Arrb1,Arrb2,Ash1l,Atf3,Atg14,Atg5,Atg7,Bag1,Bag6,Bin1,Casp3,Cav1,Cd109,Cd59a,Cdk5,Cdkn1a,Cdkn1b,Cdkn2c,Cdyl,Cflar,Chordc1,Cib1,Clec16a,Cln3,Cnksr3,Cnot6l,Cpeb1,Cpeb2,Ctdsp1,Ctdsp2,Dab2ip,Dact1,Dmd,Dnajc3,Dusp16,Dusp6,Efna1,Eif2ak3,Eif2ak4,Eif2s1,Eif4e,Eif4ebp1,Eif4ebp2,Eif4enif1,Eprs,Errfi1,Fabp4,Fam129a,Fbxo7,Flcn,Fmr1,Fnip1,Fry,Fxr1,Fyn,Gad…
GO:0008152	metabolic process	8.01e-16	5.77e-13	1222	3594	Common	1500015O10Rik,Aars,Aasdh,Abca1,Abcd1,Abhd12,Abhd13,Abhd16a,Abhd17b,Abhd4,Abraxas2,Acaa1a,Acaca,Acacb,Acadl,Acadm,Acadvl,Acan,Ace,Acot7,Acot9,Acox1,Acox3,Acss1,Acss2,Acvr1b,Acvr2a,Adam10,Adam17,Adam19,Adam9,Adamts2,Adamts7,Adamts9,Adar,Adarb1,Adcy3,Adcy4,Adcy5,Adcy6,Adcy7,Adcy9,Add1,Adgrf5,Adh1,Adh5,Adipoq,Adk,Adpgk,Adprh,Adss,Aff1,Afg3l1,Aga,Agap3,Agbl5,Agk,Agl,Ago1,Ago2,Ago4,Agpat1,Agpat5,Agtpbp…
GO:0044238	primary metabolic process	8.82e-16	5.9e-13	1080	3594	Common	1500015O10Rik,Aars,Aasdh,Abca1,Abcd1,Abhd12,Abhd13,Abhd16a,Abhd17b,Abraxas2,Acaa1a,Acaca,Acacb,Acadl,Acadm,Acadvl,Acan,Acot7,Acot9,Acox1,Acox3,Acss1,Acss2,Acvr1b,Acvr2a,Adam10,Adam17,Adam19,Adam9,Adamts2,Adamts7,Adamts9,Adar,Adarb1,Adcy3,Adcy4,Adcy5,Adcy6,Adcy7,Adcy9,Add1,Adh1,Adh5,Adipoq,Adk,Adpgk,Adprh,Adss,Aff1,Afg3l1,Aga,Agap3,Agbl5,Agk,Agl,Ago1,Ago2,Ago4,Agpat1,Agpat5,Agtpbp1,Ahcyl1,Ahr,Ajub…
GO:0032268	regulation of cellular protein metabolic process	1.44e-15	9.02e-13	490	3594	Common	3110043O21Rik,Aars,Ace,Aco1,Acvr1,Adam8,Adam9,Adar,Adipoq,Aida,Ajuba,Ankrd26,Ankrd54,Anks1,Antxr1,Anxa2,Apaf1,Apc,App,Arid5a,Arnt,Arrb1,Arrb2,Ash1l,Asxl2,Atf3,Atg14,Atg5,Atg7,Atp13a2,Atp6ap1,Axin1,Bad,Bag1,Bag6,Bak1,Bax,Bcar3,Bcl10,Bdnf,Bid,Bin1,Bmp4,Bmp6,Bnip2,Bok,Braf,Btrc,C1qtnf1,C1qtnf2,C3,Cab39,Casp3,Casp8,Casp8ap2,Casp9,Cav1,Cavin3,Ccdc88a,Ccnyl1,Cd109,Cd36,Cd44,Cd59a,Cd74,Cd84,Cdc37,Cdc42,…
GO:0043412	macromolecule modification	1.19e-14	6.98e-12	471	3594	Common	Aars,Abca1,Abhd12,Abhd13,Abhd17b,Abraxas2,Acvr1b,Acvr2a,Adam10,Adar,Adarb1,Adh5,Adprh,Agbl5,Agtpbp1,App,Arid4a,Arrdc4,Asb2,Ash1l,Ate1,Atg16l1,Atg5,Atg7,Atm,Atp7a,Atr,Axin1,B4galt1,B4gat1,Baz2a,Bgn,Bmi1,Braf,Brd4,Brpf1,Btg1,Btg2,Btk,Btrc,C1galt1c1,Camk1,Camk2d,Camk2g,Carm1,Cbx4,Cdk2,Cdk4,Cdk5,Cdkal1,Cfl1,Chfr,Chuk,Clk1,Clk2,Clk3,Clk4,Clock,Crtap,Csf1r,Csk,Csnk1a1,Csnk1d,Csnk1e,Ctcf,Ctdspl2,Ctr9,Ct…
GO:0071704	organic substance metabolic process	4.1e-14	2.26e-11	1152	3594	Common	1500015O10Rik,Aars,Aasdh,Abca1,Abcd1,Abhd12,Abhd13,Abhd16a,Abhd17b,Abhd4,Abraxas2,Acaa1a,Acaca,Acacb,Acadl,Acadm,Acadvl,Acan,Acot7,Acot9,Acox1,Acox3,Acss1,Acss2,Acvr1b,Acvr2a,Adam10,Adam17,Adam19,Adam9,Adamts2,Adamts7,Adamts9,Adar,Adarb1,Adcy3,Adcy4,Adcy5,Adcy6,Adcy7,Adcy9,Add1,Adh1,Adh5,Adipoq,Adk,Adpgk,Adprh,Adss,Aff1,Afg3l1,Aga,Agap3,Agbl5,Agk,Agl,Ago1,Ago2,Ago4,Agpat1,Agpat5,Agtpbp1,Ahcyl1,Ah…
GO:0031400	negative regulation of protein modification process	8.24e-13	4.29e-10	140	3594	Common	3110043O21Rik,Adar,Adipoq,Aida,Ankrd26,Apc,Arrb2,Ash1l,Atf3,Atg14,Atg5,Atg7,Bag1,Casp3,Cav1,Cd109,Cdk5,Cdkn1a,Cdkn1b,Cdkn2c,Cdyl,Chordc1,Cib1,Cnksr3,Ctdsp1,Ctdsp2,Dab2ip,Dact1,Dmd,Dnajc3,Dusp16,Dusp6,Efna1,Errfi1,Fabp4,Fam129a,Fbxo7,Flcn,Fry,Fyn,Gadd45a,Gadd45g,Gclc,Ggnbp2,Hgf,Hipk3,Hmg20a,Hspb1,Igbp1,Igf1,Igf1r,Impact,Inpp5k,Irak3,Itch,Jarid2,Jun,Kat2b,Kdm1a,Kdm3a,Kdm4a,Kdm4c,Kdm5a,Klf15,L3mbtl2…
GO:0009892	negative regulation of metabolic process	2.3e-12	1.13e-09	572	3594	Common	3110043O21Rik,Aatf,Acacb,Acadl,Acadvl,Ace,Acvr1b,Acvrl1,Adar,Adipoq,Aebp2,Ago2,Ahr,Aida,Ajuba,Ankrd26,Anks1,Anxa2,Apbb1,Apc,Apod,Arid1a,Arrb1,Arrb2,Ash1l,Asxl2,Atf3,Atf7ip,Atg14,Atg5,Atg7,Atoh8,Atp1a1,Atrx,Atxn1,Atxn7,Auh,Axin1,Bach1,Bag1,Bag6,Banp,Baz2a,Bbs2,Bbs4,Bcl3,Bcl6,Bcor,Bcr,Becn1,Bhlhe40,Bin1,Birc3,Bmi1,Bmp4,Bmp6,Brca2,Bscl2,Casp3,Cav1,Cavin3,Cbx1,Cbx3,Cbx4,Cbx5,Cc2d1b,Ccnd3,Cd109,Cd276,…
GO:0044248	cellular catabolic process	4.05e-12	1.89e-09	223	3594	Common	1500015O10Rik,Abcd1,Abhd12,Abhd16a,Acadl,Acadm,Acadvl,Acot7,Acox1,Acox3,Adh1,Adh5,Adipoq,Agap3,Akr1a1,Ambra1,Amdhd2,Anapc10,Arrb1,Asb2,Ate1,Atg12,Atg13,Atg14,Atg16l1,Atg3,Atg4b,Atg5,Atg7,Atg9a,Auh,Bag6,Bckdhb,Becn1,Btrc,Capn1,Cat,Ccdc47,Cdk5,Cdo1,Cemip,Ces1d,Chfr,Cisd2,Cln3,Cln6,Cln8,Clock,Cnot6l,Cnot7,Csad,Ctsd,Ctss,Cul1,Cul4a,Cyp1b1,Dcp2,Ddhd2,Dennd3,Derl2,Dis3l2,Dnajb9,Dnajc10,Dnajc3,Dnase2a,D…
GO:0031323	regulation of cellular metabolic process	4.82e-12	2.13e-09	1163	3594	Common	3110043O21Rik,Aamdc,Aars,Aatf,Abhd5,Ablim1,Acacb,Acadl,Acadm,Acadvl,Ace,Aco1,Acsl4,Acvr1,Acvr2a,Acvrl1,Adam8,Adam9,Adar,Adgrf5,Adipoq,Aebp1,Aebp2,Aff1,Ago1,Ago2,Ahctf1,Ahcyl1,Ahi1,Ahnak,Ahr,Aida,Ajuba,Akirin2,Ankrd1,Ankrd26,Ankrd54,Anks1,Antxr1,Anxa2,Apaf1,Apbb1,Apbb2,Apc,Apod,App,Arid1a,Arid5a,Arid5b,Arnt,Arntl2,Arrb1,Arrb2,Ash1l,Asxl2,Atad1,Atad5,Atf3,Atf6,Atf7ip,Atg14,Atg5,Atg7,Atm,Atmin,Atoh8…
GO:0010605	negative regulation of macromolecule metabolic process	5.02e-12	2.13e-09	532	3594	Common	3110043O21Rik,Aatf,Acacb,Ace,Acvr1b,Acvrl1,Adar,Adipoq,Aebp2,Ago2,Ahr,Aida,Ajuba,Ankrd26,Anks1,Anxa2,Apbb1,Apc,Apod,Arid1a,Arrb1,Arrb2,Ash1l,Asxl2,Atf3,Atf7ip,Atg14,Atg5,Atg7,Atoh8,Atrx,Auh,Axin1,Bach1,Bag1,Bag6,Banp,Baz2a,Bbs2,Bbs4,Bcl3,Bcl6,Bcor,Bhlhe40,Bin1,Bmi1,Bmp4,Bmp6,Brca2,Casp3,Cav1,Cbx1,Cbx3,Cbx4,Cbx5,Cc2d1b,Ccnd3,Cd109,Cd276,Cd36,Cd59a,Cdc42,Cdc73,Cdk5,Cdk6,Cdkn1a,Cdkn1b,Cdkn2c,Cdyl,Ce…
GO:0009056	catabolic process	6.89e-12	2.8e-09	246	3594	Common	1500015O10Rik,Abcd1,Abhd12,Abhd13,Abhd16a,Abhd17b,Acadl,Acadm,Acadvl,Ace,Acot7,Acox1,Acox3,Adh1,Adh5,Adipoq,Agap3,Akr1a1,Ambra1,Amdhd2,Anapc10,Arrb1,Asb2,Ate1,Atg12,Atg13,Atg14,Atg16l1,Atg3,Atg4b,Atg5,Atg7,Atg9a,Auh,Axin1,Bad,Bag6,Bckdhb,Becn1,Btrc,Capn1,Cat,Ccdc47,Cdk5,Cdo1,Cemip,Ces1d,Chfr,Cisd2,Cln3,Cln6,Cln8,Clock,Cnot6l,Cnot7,Csad,Ctsd,Ctss,Cul1,Cul2,Cul4a,Cyp1b1,Dcp2,Ddhd2,Dennd3,Derl2,Dhdh…
GO:0051171	regulation of nitrogen compound metabolic process	1.27e-11	4.94e-09	1107	3594	Common	3110043O21Rik,Aamdc,Aars,Aatf,Ablim1,Ace,Aco1,Acvr1,Acvr2a,Acvrl1,Adam8,Adam9,Adar,Adipoq,Aebp1,Aebp2,Aff1,Ago1,Ago2,Ahctf1,Ahcyl1,Ahi1,Ahnak,Ahr,Aida,Ajuba,Akirin2,Ankrd1,Ankrd26,Ankrd54,Anks1,Antxr1,Anxa2,Apaf1,Apbb1,Apbb2,Apc,Apod,App,Arid1a,Arid5a,Arid5b,Arnt,Arntl2,Arrb1,Arrb2,Ash1l,Asxl2,Atad5,Atf3,Atf6,Atf7ip,Atg14,Atg5,Atg7,Atm,Atmin,Atoh8,Atp13a2,Atp6ap1,Atp7a,Atr,Atrx,Atxn1,Atxn7,Axin1,…
GO:0080090	regulation of primary metabolic process	1.41e-11	5.27e-09	1138	3594	Common	3110043O21Rik,Aamdc,Aars,Aatf,Abhd5,Ablim1,Acacb,Acadl,Acadm,Acadvl,Ace,Aco1,Acsl4,Acvr1,Acvr2a,Acvrl1,Adam8,Adam9,Adar,Adgrf5,Adipoq,Aebp1,Aebp2,Aff1,Ago1,Ago2,Ahctf1,Ahcyl1,Ahi1,Ahnak,Ahr,Aida,Ajuba,Akirin2,Ankrd1,Ankrd26,Ankrd54,Anks1,Antxr1,Anxa2,Apaf1,Apbb1,Apbb2,Apc,Apod,App,Arid1a,Arid5a,Arid5b,Arnt,Arntl2,Arrb1,Arrb2,Ash1l,Asxl2,Atad5,Atf3,Atf6,Atf7ip,Atg14,Atg5,Atg7,Atm,Atmin,Atoh8,Atp13…
GO:0051172	negative regulation of nitrogen compound metabolic process	2.32e-11	8.36e-09	495	3594	Common	3110043O21Rik,Aatf,Adar,Adipoq,Aebp2,Ahr,Aida,Ajuba,Ankrd26,Anks1,Anxa2,Apbb1,Apc,Apod,Arid1a,Arrb1,Arrb2,Ash1l,Asxl2,Atf3,Atf7ip,Atg14,Atg5,Atg7,Atoh8,Atrx,Axin1,Bach1,Bag1,Bag6,Banp,Baz2a,Bcl3,Bcl6,Bcor,Bhlhe40,Bin1,Bmi1,Bmp4,Bmp6,Brca2,Casp3,Cav1,Cbx1,Cbx3,Cbx4,Cbx5,Cc2d1b,Ccnd3,Cd109,Cd276,Cd36,Cd59a,Cdc73,Cdk5,Cdk6,Cdkn1a,Cdkn1b,Cdkn2c,Cdyl,Cebpb,Cebpd,Cflar,Chd8,Chordc1,Cib1,Cic,Ciita,Cipc,…
GO:0031324	negative regulation of cellular metabolic process	3.99e-11	1.38e-08	520	3594	Common	3110043O21Rik,Aatf,Acacb,Acadl,Acadvl,Adar,Adipoq,Aebp2,Ahr,Aida,Ajuba,Ankrd26,Anks1,Anxa2,Apc,Apod,Arid1a,Arrb1,Arrb2,Ash1l,Asxl2,Atf3,Atf7ip,Atg14,Atg5,Atg7,Atoh8,Atp1a1,Atrx,Atxn1,Atxn7,Axin1,Bach1,Bag1,Bag6,Baz2a,Bcl3,Bcl6,Bcor,Bcr,Becn1,Bhlhe40,Bin1,Birc3,Bmi1,Bmp4,Bmp6,Brca2,Casp3,Cav1,Cavin3,Cbx1,Cbx3,Cbx4,Cbx5,Cc2d1b,Ccnd3,Cd109,Cd276,Cd36,Cd59a,Cdc73,Cdk5,Cdk6,Cdkn1a,Cdkn1b,Cdkn2c,Cdyl,C…
GO:0019222	regulation of metabolic process	4.43e-11	1.48e-08	1262	3594	Common	3110043O21Rik,Aamdc,Aars,Aatf,Abhd5,Ablim1,Acacb,Acadl,Acadm,Acadvl,Ace,Aco1,Acsl4,Acvr1,Acvr1b,Acvr2a,Acvrl1,Adam8,Adam9,Adar,Adgrf5,Adipoq,Aebp1,Aebp2,Aff1,Ago1,Ago2,Ahctf1,Ahcyl1,Ahi1,Ahnak,Ahr,Aida,Ajuba,Akirin2,Alkbh1,Ank2,Ankrd1,Ankrd26,Ankrd54,Anks1,Antxr1,Anxa2,Apaf1,Apbb1,Apbb2,Apc,Apod,App,Arid1a,Arid5a,Arid5b,Arnt,Arntl2,Arrb1,Arrb2,Ash1l,Asxl2,Atad1,Atad5,Atf3,Atf6,Atf7ip,Atg14,Atg5,A…
GO:0001933	negative regulation of protein phosphorylation	2.45e-10	7.92e-08	104	3594	Common	3110043O21Rik,Adar,Adipoq,Aida,Ankrd26,Apc,Arrb2,Ash1l,Atf3,Atg14,Bag1,Casp3,Cav1,Cd109,Cdkn1a,Cdkn1b,Cdkn2c,Chordc1,Cib1,Cnksr3,Ctdsp1,Ctdsp2,Dab2ip,Dact1,Dmd,Dnajc3,Dusp16,Dusp6,Efna1,Errfi1,Fabp4,Fam129a,Fbxo7,Flcn,Gadd45a,Gadd45g,Ggnbp2,Hgf,Hipk3,Hspb1,Igf1,Igf1r,Impact,Inpp5k,Irak3,Itch,Jun,Kat2b,Lemd2,Lrrk1,Lrrk2,Lyn,Mapk7,Mical1,Ndrg2,Nf1,Nf2,P2rx7,Pard3,Pde4d,Pkib,Pkig,Plpp3,Ppp1r15a,Ppp1…
GO:0070887	cellular response to chemical stimulus	2.58e-10	8.07e-08	484	3594	Common	Abca1,Abtb2,Acaca,Acvr1,Acvr2a,Acvrl1,Adam8,Adam9,Adar,Adcy3,Adcy6,Add1,Adh5,Adipoq,Adipor2,Adnp2,Adprhl2,Agap3,Ago2,Ahr,Akap8,Ank3,Ankrd1,Ano6,Anxa1,Anxa2,Apc,Arhgef5,Arid5a,Atf3,Atg7,Atp13a2,Atp1a2,Atp7a,Atrx,B2m,Bad,Bax,Bbs2,Bbs4,Bcl2l1,Bcr,Bdnf,Bmp4,Bmp6,Bmpr1a,Bmpr1b,Bmpr2,Braf,Btk,Btrc,C2cd5,C5ar1,Calcoco1,Capg,Capn10,Capn2,Carm1,Casp3,Casp9,Cav1,Ccl2,Ccr1,Cd14,Cd180,Cd300lf,Cd36,Cd68,Cd74,…
GO:0031399	regulation of protein modification process	3.84e-10	1.16e-07	364	3594	Common	3110043O21Rik,Ace,Acvr1,Adam8,Adar,Adipoq,Aida,Ajuba,Ankrd26,Ankrd54,Apc,Arid5a,Arnt,Arrb1,Arrb2,Ash1l,Asxl2,Atf3,Atg14,Atg5,Atg7,Atp6ap1,Axin1,Bag1,Bcar3,Bdnf,Bmp4,Bmp6,Bnip2,Braf,C1qtnf1,C1qtnf2,Cab39,Casp3,Cav1,Cavin3,Ccdc88a,Ccnyl1,Cd109,Cd36,Cd44,Cd74,Cd84,Cdc37,Cdc42,Cdk5,Cdkn1a,Cdkn1b,Cdkn2c,Cdon,Cdyl,Cenpe,Chfr,Chordc1,Cib1,Clip3,Cln3,Cnksr3,Crebl2,Csf1r,Cspg4,Ctcf,Ctdsp1,Ctdsp2,Ctnnb1,Ct…
GO:0060255	regulation of macromolecule metabolic process	4.26e-10	1.25e-07	1175	3594	Common	3110043O21Rik,Aamdc,Aars,Aatf,Ablim1,Acacb,Ace,Aco1,Acvr1,Acvr1b,Acvr2a,Acvrl1,Adam8,Adam9,Adar,Adipoq,Aebp1,Aebp2,Aff1,Ago1,Ago2,Ahctf1,Ahcyl1,Ahi1,Ahnak,Ahr,Aida,Ajuba,Akirin2,Alkbh1,Ank2,Ankrd1,Ankrd26,Ankrd54,Anks1,Antxr1,Anxa2,Apaf1,Apbb1,Apbb2,Apc,Apod,App,Arid1a,Arid5a,Arid5b,Arnt,Arntl2,Arrb1,Arrb2,Ash1l,Asxl2,Atad1,Atad5,Atf3,Atf6,Atf7ip,Atg14,Atg5,Atg7,Atm,Atmin,Atoh8,Atp13a2,Atp1b1,Atp…
GO:0042326	negative regulation of phosphorylation	4.89e-10	1.39e-07	117	3594	Common	3110043O21Rik,Adar,Adipoq,Aida,Ajuba,Ankrd26,Apc,Arrb2,Ash1l,Atf3,Atg14,Atxn1,Atxn7,Bag1,Birc3,Casp3,Cav1,Cd109,Cdkn1a,Cdkn1b,Cdkn2c,Chordc1,Cib1,Cnksr3,Ctdsp1,Ctdsp2,Dab2ip,Dact1,Dmd,Dnajc15,Dnajc3,Dusp16,Dusp6,Efna1,Errfi1,Fabp4,Fam129a,Fbxo7,Flcn,Gadd45a,Gadd45g,Ggnbp2,Grb10,Hgf,Hipk3,Hspb1,Ier3,Igf1,Igf1r,Impact,Inpp5k,Irak3,Itch,Jun,Kat2b,Lemd2,Lrrk1,Lrrk2,Lyn,Mapk7,Mical1,Ndrg2,Nf1,Nf2,P2rx…
GO:0006996	organelle organization	7.82e-10	2.15e-07	581	3594	Common	2410089E03Rik,2700049A03Rik,Acp2,Actl6a,Actn1,Actr2,Adgrg6,Agfg1,Ago4,Agtpbp1,Ahi1,Aif1,Aifm1,Akap8,Alms1,Als2,Apc,Aqp1,Arhgap10,Arhgap35,Arhgef2,Arhgef28,Arhgef5,Arid1a,Arid4a,Arl13b,Arl3,Ash1l,Aspm,Atg12,Atg13,Atg16l1,Atg3,Atg4b,Atg5,Atg7,Atg9a,Atm,Atmin,Atp2a2,Atp6v0c,Atp7a,Atr,Atrx,Atxn10,Bad,Bag6,Baiap2,Bak1,Bax,Baz1a,Baz1b,Baz2a,Bbs2,Bbs4,Bbs9,Bcas3,Bccip,Bcl6,Becn1,Bicd1,Bicd2,Bid,Bloc1s6,…
GO:0051174	regulation of phosphorus metabolic process	8.78e-10	2.35e-07	336	3594	Common	3110043O21Rik,Ace,Acvr1,Adam8,Adar,Adgrf5,Adipoq,Aida,Ajuba,Ankrd26,Ankrd54,Apc,Arrb1,Arrb2,Ash1l,Atf3,Atg14,Atp6ap1,Atp7a,Atxn1,Atxn7,Axin1,Bad,Bag1,Bcar3,Bdnf,Birc3,Bmp4,Bmp6,Bnip2,Braf,Btbd10,C1qtnf1,C1qtnf2,Cab39,Casp3,Cav1,Cavin3,Ccdc88a,Ccnyl1,Cd109,Cd36,Cd44,Cd74,Cd84,Cdc37,Cdc42,Cdk5,Cdkn1a,Cdkn1b,Cdkn2c,Cdon,Cenpe,Chordc1,Cib1,Clip3,Cln3,Cnksr3,Cox7a2l,Crebl2,Csf1r,Cspg4,Ctdsp1,Ctdsp2,Cx…
GO:0045936	negative regulation of phosphate metabolic process	1.08e-09	2.74e-07	122	3594	Common	3110043O21Rik,Adar,Adipoq,Aida,Ajuba,Ankrd26,Apc,Arrb2,Ash1l,Atf3,Atg14,Atxn1,Atxn7,Bag1,Birc3,Casp3,Cav1,Cd109,Cdkn1a,Cdkn1b,Cdkn2c,Chordc1,Cib1,Cnksr3,Ctdsp1,Ctdsp2,Dab2ip,Dact1,Dmd,Dnajc15,Dnajc3,Dusp16,Dusp6,Efna1,Errfi1,Fabp4,Fam129a,Fbxo7,Flcn,Gadd45a,Gadd45g,Ggnbp2,Grb10,Hgf,Hipk3,Hspb1,Ier3,Igbp1,Igf1,Igf1r,Impact,Inpp5k,Irak3,Itch,Jun,Kat2b,Lemd2,Lrrk1,Lrrk2,Lyn,Mapk7,Mical1,Ndrg2,Nf1,Nf…
GO:0010563	negative regulation of phosphorus metabolic process	1.08e-09	2.74e-07	122	3594	Common	3110043O21Rik,Adar,Adipoq,Aida,Ajuba,Ankrd26,Apc,Arrb2,Ash1l,Atf3,Atg14,Atxn1,Atxn7,Bag1,Birc3,Casp3,Cav1,Cd109,Cdkn1a,Cdkn1b,Cdkn2c,Chordc1,Cib1,Cnksr3,Ctdsp1,Ctdsp2,Dab2ip,Dact1,Dmd,Dnajc15,Dnajc3,Dusp16,Dusp6,Efna1,Errfi1,Fabp4,Fam129a,Fbxo7,Flcn,Gadd45a,Gadd45g,Ggnbp2,Grb10,Hgf,Hipk3,Hspb1,Ier3,Igbp1,Igf1,Igf1r,Impact,Inpp5k,Irak3,Itch,Jun,Kat2b,Lemd2,Lrrk1,Lrrk2,Lyn,Mapk7,Mical1,Ndrg2,Nf1,Nf…
GO:0019220	regulation of phosphate metabolic process	1.12e-09	2.76e-07	335	3594	Common	3110043O21Rik,Ace,Acvr1,Adam8,Adar,Adgrf5,Adipoq,Aida,Ajuba,Ankrd26,Ankrd54,Apc,Arrb1,Arrb2,Ash1l,Atf3,Atg14,Atp6ap1,Atp7a,Atxn1,Atxn7,Axin1,Bad,Bag1,Bcar3,Bdnf,Birc3,Bmp4,Bmp6,Bnip2,Braf,Btbd10,C1qtnf1,C1qtnf2,Cab39,Casp3,Cav1,Cavin3,Ccdc88a,Ccnyl1,Cd109,Cd36,Cd44,Cd74,Cd84,Cdc37,Cdc42,Cdk5,Cdkn1a,Cdkn1b,Cdkn2c,Cdon,Cenpe,Chordc1,Cib1,Clip3,Cln3,Cnksr3,Cox7a2l,Crebl2,Csf1r,Cspg4,Ctdsp1,Ctdsp2,Cx…
GO:0051641	cellular localization	1.27e-09	3.05e-07	363	3594	Common	2410089E03Rik,Actr2,Agap3,Ahcyl1,Ahi1,Ajuba,Als2,Amph,Ank2,Ank3,Ankrd27,Ankrd54,Ap1b1,Ap1g1,Ap1m1,Ap1s1,Ap1s2,Ap2a1,Ap2b1,Ap2m1,Ap3b1,Ap3m1,Ap3m2,Ap4e1,Ap4m1,Ap4s1,App,Arf6,Arhgef2,Arl3,Arl6ip1,Armcx3,Aspm,Atg9a,Atm,Atp6ap1,Atrx,Axin1,Bag1,Banp,Bax,Bbs2,Bbs4,Bcap31,Bcr,Bicd2,Bid,Bin1,Bloc1s5,Bloc1s6,Brca2,C2cd3,C2cd5,Camk1,Canx,Carm1,Casc3,Cc2d2a,Ccdc141,Cd74,Cdc42,Cdc42bpa,Cdh2,Cdk5,Cdk5rap2,Cep…
GO:0046907	intracellular transport	1.83e-09	4.28e-07	202	3594	Common	Actr2,Agap3,Ahcyl1,Als2,Ankrd27,Ankrd54,Ap1b1,Ap1g1,Ap1m1,Ap1s1,Ap2a1,Ap2m1,Ap3b1,Ap3m1,Ap3m2,Ap4e1,Ap4m1,Ap4s1,App,Arl3,Arl6ip1,Axin1,Bcap31,Bcr,Bicd2,Bid,Bloc1s5,Bloc1s6,Camk1,Cd74,Cdc42,Cdc42bpa,Cdk5,Cep120,Cep57,Chmp5,Clip1,Col4a3bp,Coro1a,Creb3l2,Ctnnb1,Cttn,Dctn1,Dctn2,Dennd1a,Dennd1b,Derl2,Dock7,Dst,Dync2h1,Dynll1,Emp2,Erbin,Erc1,Fbxo22,Fgfr2,Fhod1,Flna,Fmr1,Gsk3b,Hspa9,Htt,Ick,Ift122,Ift1…
GO:0042325	regulation of phosphorylation	1.95e-09	4.36e-07	319	3594	Common	3110043O21Rik,Ace,Acvr1,Adam8,Adar,Adipoq,Aida,Ajuba,Ankrd26,Ankrd54,Apc,Arrb1,Arrb2,Ash1l,Atf3,Atg14,Atp6ap1,Atp7a,Atxn1,Atxn7,Axin1,Bad,Bag1,Bcar3,Bdnf,Birc3,Bmp4,Bmp6,Bnip2,Braf,Btbd10,C1qtnf1,C1qtnf2,Cab39,Casp3,Cav1,Cavin3,Ccdc88a,Ccnyl1,Cd109,Cd36,Cd44,Cd74,Cd84,Cdc37,Cdc42,Cdk5,Cdkn1a,Cdkn1b,Cdkn2c,Cdon,Cenpe,Chordc1,Cib1,Clip3,Cln3,Cnksr3,Cox7a2l,Crebl2,Csf1r,Cspg4,Ctdsp1,Ctdsp2,Cxcr4,Dab…
GO:0033043	regulation of organelle organization	1.96e-09	4.36e-07	227	3594	Common	3110043O21Rik,Akap13,Apc,Arhgap35,Arhgef2,Arid5a,Arpc2,Asap1,Asxl2,Atg3,Atg5,Atg7,Atm,Atmin,Atp13a2,Atr,Atrx,Bbs4,Bcas3,Becn1,Bnip3,Bok,Braf,C2cd5,Capza1,Capzb,Carmil1,Cdc37,Cdc42,Cdh2,Cdk11b,Cdk5rap2,Cenpe,Cep120,Cep97,Cfl1,Chordc1,Clasp1,Clasp2,Clec16a,Coro1a,Csf1r,Ctcf,Ctnnb1,Ctr9,Cttn,Cyld,Ddhd2,Dixdc1,Dkc1,Dlg1,Dnm1l,Dst,Dstn,Dynll1,Dyrk1a,Eed,Ehmt2,Eif4g3,Eml4,Eps8,Ercc1,Evl,Fam162a,Fgr,Flc…
GO:0044265	cellular macromolecule catabolic process	2.42e-09	5.28e-07	104	3594	Common	1500015O10Rik,Agap3,Anapc10,Arrb1,Asb2,Ate1,Auh,Bag6,Btrc,Ccdc47,Chfr,Cln6,Cln8,Clock,Cnot6l,Cnot7,Ctss,Cul1,Cul4a,Dcp2,Dennd3,Derl2,Dis3l2,Dnajb9,Dnajc10,Dnajc3,Dnase2a,Edem1,Edem3,Exosc5,Fbxl3,Fbxo6,Fbxw11,Fbxw7,Gsk3a,Gtpbp2,Hdac6,Herpud1,Hspa5,Itch,Khsrp,Lgmn,Manba,Mettl14,Mettl16,Mettl3,Mlh1,Mylip,Nedd4,Ngly1,Nr1d1,Nrros,Oas2,Otud5,Pan3,Parn,Plaa,Pnpt1,Ppp1r11,Ppp2cb,Ppt1,Prpf19,Psmb5,Psme4,R…
GO:0009057	macromolecule catabolic process	2.72e-09	5.79e-07	123	3594	Common	1500015O10Rik,Abhd12,Abhd13,Abhd17b,Agap3,Anapc10,Arrb1,Asb2,Ate1,Atg7,Auh,Axin1,Bag6,Btrc,Capn1,Ccdc47,Cdk5,Cemip,Chfr,Cln6,Cln8,Clock,Cnot6l,Cnot7,Ctss,Cul1,Cul2,Cul4a,Dcp2,Dennd3,Derl2,Dis3l2,Dnajb9,Dnajc10,Dnajc3,Dnase2a,Edem1,Edem3,Exosc5,Fbxl3,Fbxo6,Fbxw11,Fbxw7,Gsk3a,Gtpbp2,Hdac6,Herpud1,Hspa5,Itch,Khsrp,Lamp2,Lgmn,Lnpep,Lypla1,Lypla2,Lyve1,Manba,Mettl14,Mettl16,Mettl3,Mlh1,Mylip,Nedd4,Ngl…
GO:0048523	negative regulation of cellular process	3.56e-09	7.41e-07	1031	3594	Common	3110043O21Rik,Aamdc,Aars,Aatf,Abca5,Abhd2,Abr,Abraxas2,Acacb,Acadl,Acadvl,Ace,Acvrl1,Adam8,Adamts9,Adar,Adcy6,Adgra2,Adgrf5,Adgrg1,Adipoq,Adnp2,Aebp2,Ago4,Ahi1,Ahr,Aida,Ajuba,Akr1b3,Alkbh1,Alms1,Ambra1,Angpt2,Angptl4,Ank3,Ankrd26,Anks1,Antxr1,Anxa2,Apbb1,Apbb2,Apc,Apod,App,Arap3,Arhgap10,Arhgap24,Arhgap35,Arhgap42,Arhgef15,Arhgef2,Arid1a,Arrb1,Arrb2,Arrdc3,Asap1,Ash1l,Aspm,Aspn,Asxl2,Atad1,Atf3,A…
GO:0001944	vasculature development	4.85e-09	9.87e-07	215	3594	Common	2410089E03Rik,Acvr1,Acvrl1,Adam8,Adamts6,Adamts9,Adgra2,Adipor2,Adm,Ahr,Angpt2,Antxr1,Anxa2,Ap2b1,Arhgef15,Arid1a,Arid2,Atp7a,B4galt1,Becn1,Bmp4,Bmpr1a,Bmpr2,Casp8,Cav1,Ccl2,Ccm2,Cdh2,Cdh5,Chd7,Chm,Clec14a,Clic4,Cntrl,Col3a1,Ctgf,Ctnnb1,Cul7,Cx3cl1,Cxcl12,Cxcr4,Cyp1b1,Cyr61,Dctn5,Dicer1,Dll4,Dnm2,Dync2h1,Edn1,Efnb2,Eng,Enpep,Epas1,Epha2,Ephb3,Ephb4,Errfi1,Eya1,Fbxw7,Fbxw8,Fgf1,Fgfr1,Fgfr2,Flna,Fl…
GO:0007033	vacuole organization	5.65e-09	1.12e-06	40	3594	Common	Acp2,Atg12,Atg13,Atg16l1,Atg3,Atg4b,Atg5,Atg7,Atg9a,Atp6v0c,Becn1,Chmp5,Cln3,Cln5,Cln6,Cln8,Ctsd,Fig4,Gba,Hexa,Hexb,Irgm1,Lamtor1,Lyst,Myo7a,Naglu,P2rx7,Pik3c3,Ppt1,Psen1,Rab34,Rb1cc1,Snapin,Spg11,Srpx,Tmem106b,Tpp1,Ulk1,Vps35,Wipi2
GO:0072358	cardiovascular system development	1.04e-08	2.03e-06	221	3594	Common	2410089E03Rik,Acvr1,Acvrl1,Adam8,Adamts6,Adamts9,Adgra2,Adipor2,Adm,Ahr,Angpt2,Antxr1,Anxa2,Ap2b1,Arhgef15,Arid1a,Arid2,Atp7a,B4galt1,Becn1,Bmp4,Bmpr1a,Bmpr2,Casp8,Cav1,Ccl2,Ccm2,Cdh2,Cdh5,Chd7,Chm,Clec14a,Clic4,Cntrl,Col3a1,Ctgf,Ctnnb1,Cul7,Cx3cl1,Cxcl12,Cxcr4,Cyp1b1,Cyr61,Dctn5,Dicer1,Dll4,Dnm2,Dync2h1,Edn1,Efnb2,Eng,Enpep,Epas1,Epha2,Ephb3,Ephb4,Errfi1,Eya1,Fbxw7,Fbxw8,Fgf1,Fgfr1,Fgfr2,Flna,Fl…
GO:0033554	cellular response to stress	1.06e-08	2.03e-06	272	3594	Common	1500015O10Rik,Adnp2,Adprhl2,Agap3,Aifm1,Apaf1,Apbb1,Atf2,Atf3,Atg13,Atg14,Atg4b,Atg5,Atg7,Atm,Atp13a2,Atp7a,Atr,Atrx,Bad,Bag6,Bak1,Bax,Bccip,Bcl2l1,Becn1,Bid,Brca2,Casp3,Casp9,Ccdc47,Cd36,Cdc37,Cdkn1a,Cebpb,Chd2,Col4a3bp,Cpeb1,Cpeb2,Creb3l1,Ctc1,Cyp1b1,Dab2,Dab2ip,Dclre1a,Ddrgk1,Derl1,Derl2,Dhx9,Dnajb9,Dnajc10,Dnajc15,Dnajc3,Edem1,Edem3,Egr1,Ei24,Eif2a,Eif2ak3,Eif2ak4,Eif2s1,Ep300,Epas1,Ercc1,Erc…
GO:0071310	cellular response to organic substance	1.36e-08	2.54e-06	383	3594	Common	Abca1,Acaca,Acvr1,Acvr2a,Acvrl1,Adam9,Adar,Adcy3,Adcy6,Adipor2,Adnp2,Ago2,Ahr,Akap8,Ankrd1,Anxa1,Apc,Arid5a,Atf3,Atp1a2,Bad,Bax,Bbs2,Bbs4,Bcl2l1,Bcr,Bmp4,Bmp6,Bmpr1a,Bmpr1b,Bmpr2,Btk,Btrc,C2cd5,Calcoco1,Capg,Capn10,Capn2,Carm1,Casp3,Casp9,Cav1,Ccl2,Cd14,Cd180,Cd300lf,Cd36,Cd68,Cd74,Cd86,Cdc42,Cdc73,Cdk4,Cdkn1b,Cebpb,Cib1,Cnot9,Col16a1,Col1a2,Col3a1,Col4a1,Col5a2,Col6a1,Coro1a,Cpeb1,Cpeb4,Creb1,Cr…
GO:0051649	establishment of localization in cell	1.49e-08	2.74e-06	244	3594	Common	Actr2,Agap3,Ahcyl1,Ahi1,Als2,Amph,Ankrd27,Ankrd54,Ap1b1,Ap1g1,Ap1m1,Ap1s1,Ap1s2,Ap2a1,Ap2b1,Ap2m1,Ap3b1,Ap3m1,Ap3m2,Ap4e1,Ap4m1,Ap4s1,App,Arhgef2,Arl3,Arl6ip1,Atm,Axin1,Bax,Bcap31,Bcr,Bicd2,Bid,Bloc1s5,Bloc1s6,Camk1,Canx,Cd74,Cdc42,Cdc42bpa,Cdk5,Cdk5rap2,Cep120,Cep57,Cep63,Cep83,Chmp5,Clcn3,Clip1,Cln8,Col4a3bp,Coro1a,Creb3l2,Ctnnb1,Cttn,Dctn1,Dctn2,Dennd1a,Dennd1b,Derl2,Dnajc6,Dock7,Dst,Dync2h1,D…
GO:0044257	cellular protein catabolic process	1.62e-08	2.9e-06	77	3594	Common	1500015O10Rik,Agap3,Anapc10,Arrb1,Asb2,Ate1,Bag6,Btrc,Ccdc47,Chfr,Cln8,Clock,Ctss,Cul1,Cul4a,Dennd3,Derl2,Dnajb9,Dnajc10,Dnajc3,Edem1,Edem3,Fbxl3,Fbxo6,Fbxw11,Fbxw7,Gsk3a,Hdac6,Herpud1,Hspa5,Itch,Lgmn,Mylip,Nedd4,Nr1d1,Nrros,Otud5,Plaa,Ppp1r11,Ppp2cb,Ppt1,Prpf19,Psmb5,Psme4,Rab12,Rbbp6,Rhbdd1,Rlim,Rnf111,Rnf34,Rnf6,Sel1l,Siah1a,Skp1a,Spop,Syvn1,Tbl1xr1,Tor1a,Uba6,Uba7,Ube2g2,Ube2j1,Ube2l3,Ube2w,U…
GO:0006914	autophagy	1.68e-08	2.9e-06	35	3594	Common	Ambra1,Atg12,Atg13,Atg14,Atg16l1,Atg3,Atg4b,Atg5,Atg7,Atg9a,Becn1,Cisd2,Cln3,Ctsd,Ei24,Gba,Gopc,Hspa8,Irgm1,Lamp2,Map1lc3b,Mcoln1,Pik3c3,Psen1,Rab7,Rb1cc1,Retreg1,Snapin,Srpx,Ulk1,Ulk2,Vmp1,Vps4a,Vps4b,Wipi2
GO:0061919	process utilizing autophagic mechanism	1.68e-08	2.9e-06	35	3594	Common	Ambra1,Atg12,Atg13,Atg14,Atg16l1,Atg3,Atg4b,Atg5,Atg7,Atg9a,Becn1,Cisd2,Cln3,Ctsd,Ei24,Gba,Gopc,Hspa8,Irgm1,Lamp2,Map1lc3b,Mcoln1,Pik3c3,Psen1,Rab7,Rb1cc1,Retreg1,Snapin,Srpx,Ulk1,Ulk2,Vmp1,Vps4a,Vps4b,Wipi2
GO:0048519	negative regulation of biological process	1.85e-08	3.15e-06	1146	3594	Common	3110043O21Rik,Aamdc,Aars,Aatf,Abca5,Abhd17b,Abhd2,Abhd5,Abr,Abraxas2,Acacb,Acadl,Acadvl,Ace,Acvr1b,Acvrl1,Adam8,Adamts9,Adar,Adcy6,Adgra2,Adgrf5,Adgrg1,Adipoq,Adnp2,Aebp2,Ago2,Ago4,Ahi1,Ahr,Aida,Ajuba,Akap8,Akr1b3,Alkbh1,Alms1,Ambra1,Angpt2,Angptl4,Ank3,Ankrd26,Anks1,Antxr1,Anxa2,Aoah,Apbb1,Apbb2,Apc,Apod,App,Arap3,Arf6,Arhgap10,Arhgap24,Arhgap35,Arhgap42,Arhgef15,Arhgef2,Arid1a,Arl6ip5,Arrb1,Arr…
GO:0009894	regulation of catabolic process	1.97e-08	3.29e-06	153	3594	Common	3110043O21Rik,Abhd5,Acacb,Adam8,Adam9,Ago2,Anks1,Anxa2,Apc,Atg7,Atm,Atp13a2,Axin1,Bag6,Banp,Becn1,Brf1,Bscl2,Btrc,Casp1,Cblb,Cdc37,Cdc42,Cdk4,Chfr,Chmp4b,Cidea,Clec16a,Cnot6l,Cnot7,Crtc3,Csnk1d,Csnk1e,Ctsa,Cttn,Cul4b,Dab2ip,Dicer1,Edem1,Edem2,Ehmt2,Eif2ak4,Eif6,Elavl1,Fbxl5,Fbxo22,Fbxw7,Fmr1,Fyn,Gba,Gclc,Gna12,Herc1,Herpud1,Hif1a,Hmgb1,Hmox1,Hnrnpd,Htra2,Idh1,Ier3,Ift20,Ift88,Il33,Irak3,Irgm1,Itc…
GO:1901698	response to nitrogen compound	2.61e-08	4.29e-06	184	3594	Common	Adar,Adcy6,Adgrl3,Ago2,Apc,Atrx,Bcl2l1,C2cd5,C5ar1,Capn10,Capn2,Casp1,Ccdc47,Cd36,Cd81,Cd9,Cdk4,Cdk5,Cebpb,Cfl1,Col16a1,Col1a2,Col3a1,Col4a1,Col5a2,Col6a1,Cpeb1,Cpeb4,Creb1,Crem,Ddx1,Ddx21,Ddx58,Dennd4c,Derl2,Dhx36,Dicer1,Dnajb9,Dnajc10,Dnmt1,Dnmt3a,Drosha,Edem1,Edem3,Egfr,Egr1,Ehmt2,Eif4ebp1,Eif4ebp2,Eif6,Ezh2,Fbxo6,Fcgr2b,Fmr1,Foxo1,Ghr,Gnai2,Gsk3a,Gsk3b,Hadha,Hdac2,Hdac5,Homer1,Hprt,Igf1,Igf1r…
GO:0010033	response to organic substance	2.8e-08	4.52e-06	494	3594	Common	Abca1,Abr,Acaca,Acvr1,Acvr2a,Acvrl1,Adam9,Adar,Adcy3,Adcy6,Adgrl3,Adh1,Adh5,Adipoq,Adipor2,Adnp2,Ago2,Ahr,Akap8,Akirin2,Ankrd1,Anxa1,Anxa5,Apc,Arid5a,Atf3,Atp1a2,Atrx,B2m,Bad,Bax,Bbs2,Bbs4,Bcl2l1,Bcr,Bmp4,Bmp6,Bmpr1a,Bmpr1b,Bmpr2,Btk,Btrc,C2cd5,C5ar1,Calcoco1,Capg,Capn10,Capn2,Carm1,Casp1,Casp3,Casp9,Cav1,Ccdc47,Ccl2,Cd14,Cd180,Cd300lf,Cd36,Cd68,Cd74,Cd81,Cd83,Cd86,Cd9,Cdc42,Cdc73,Cdk4,Cdk5,Cdk6,…
GO:0001932	regulation of protein phosphorylation	2.85e-08	4.52e-06	290	3594	Common	3110043O21Rik,Ace,Acvr1,Adam8,Adar,Adipoq,Aida,Ajuba,Ankrd26,Ankrd54,Apc,Arrb1,Arrb2,Ash1l,Atf3,Atg14,Atp6ap1,Axin1,Bag1,Bcar3,Bdnf,Bmp4,Bmp6,Bnip2,Braf,C1qtnf1,C1qtnf2,Cab39,Casp3,Cav1,Cavin3,Ccdc88a,Ccnyl1,Cd109,Cd36,Cd44,Cd74,Cd84,Cdc37,Cdc42,Cdk5,Cdkn1a,Cdkn1b,Cdkn2c,Cdon,Cenpe,Chordc1,Cib1,Clip3,Cln3,Cnksr3,Crebl2,Csf1r,Cspg4,Ctdsp1,Ctdsp2,Cxcr4,Dab2,Dab2ip,Dact1,Dhx33,Dicer1,Dlg1,Dmd,Dnajc3…
GO:0080135	regulation of cellular response to stress	2.94e-08	4.59e-06	136	3594	Common	Aida,Apbb1,Axin1,Bad,Bcl6,Bid,Bok,Braf,Cd36,Cd44,Cd74,Chordc1,Commd1,Creb3l1,Ctnnb1,Cul4a,Dab2,Dab2ip,Dact1,Dek,Dnajc3,Dusp22,Dvl2,Dyrk1a,Edem1,Edem2,Eef1e1,Eif2ak3,Eif2ak4,Ern1,Erp29,Fbln5,Fbxo18,Fbxo4,Fbxw7,Fcgr2b,Fech,Fmr1,Fut8,Fzd1,Gab1,Gpx1,Grina,Helb,Herpud1,Hgf,Hipk3,Hmgb1,Hnrnpk,Hspb1,Hsph1,Hyou1,Ier3,Impact,Inpp5f,Irak1,Itch,Klf4,Lrig2,Map2k1,Map3k1,Map3k3,Map3k4,Map3k5,Mapk1,Mapk3,Mapk8…
GO:1901575	organic substance catabolic process	3e-08	4.61e-06	207	3594	Common	1500015O10Rik,Abcd1,Abhd12,Abhd13,Abhd16a,Abhd17b,Acadl,Acadm,Acadvl,Acot7,Acox1,Acox3,Adh1,Adh5,Adipoq,Agap3,Akr1a1,Amdhd2,Anapc10,Arrb1,Asb2,Ate1,Atg7,Auh,Axin1,Bad,Bag6,Bckdhb,Btrc,Capn1,Ccdc47,Cdk5,Cdo1,Cemip,Ces1d,Chfr,Cln6,Cln8,Clock,Cnot6l,Cnot7,Csad,Ctss,Cul1,Cul2,Cul4a,Cyp1b1,Dcp2,Ddhd2,Dennd3,Derl2,Dhdh,Dis3l2,Dnajb9,Dnajc10,Dnajc3,Dnase2a,Dpyd,Eci1,Edem1,Edem3,Enpp2,Entpd1,Exosc5,Fah,F…
GO:0030163	protein catabolic process	3.37e-08	5.09e-06	92	3594	Common	1500015O10Rik,Abhd12,Abhd13,Abhd17b,Agap3,Anapc10,Arrb1,Asb2,Ate1,Atg7,Axin1,Bag6,Btrc,Ccdc47,Chfr,Cln8,Clock,Ctss,Cul1,Cul2,Cul4a,Dennd3,Derl2,Dnajb9,Dnajc10,Dnajc3,Edem1,Edem3,Fbxl3,Fbxo6,Fbxw11,Fbxw7,Gsk3a,Hdac6,Herpud1,Hspa5,Itch,Lamp2,Lgmn,Lnpep,Lypla1,Lypla2,Manba,Mylip,Nedd4,Ngly1,Nr1d1,Nrros,Otud5,Pja1,Plaa,Ppp1r11,Ppp2cb,Ppt1,Prpf19,Psmb3,Psmb5,Psme4,Rab12,Rbbp6,Rhbdd1,Rlim,Rnf111,Rnf34,…
GO:0051603	proteolysis involved in cellular protein catabolic process	3.98e-08	5.92e-06	73	3594	Common	1500015O10Rik,Agap3,Anapc10,Arrb1,Asb2,Ate1,Bag6,Btrc,Ccdc47,Chfr,Clock,Ctss,Cul1,Cul4a,Derl2,Dnajb9,Dnajc10,Dnajc3,Edem1,Edem3,Fbxl3,Fbxo6,Fbxw11,Fbxw7,Gsk3a,Hdac6,Herpud1,Hspa5,Itch,Lgmn,Mylip,Nedd4,Nr1d1,Nrros,Otud5,Plaa,Ppp1r11,Ppp2cb,Prpf19,Psmb5,Psme4,Rbbp6,Rhbdd1,Rlim,Rnf111,Rnf34,Rnf6,Sel1l,Siah1a,Skp1a,Spop,Syvn1,Tbl1xr1,Tor1a,Uba6,Uba7,Ube2g2,Ube2j1,Ube2l3,Ube2w,Ube3a,Ube4b,Ubr1,Ubr2,Ub…
GO:0071840	cellular component organization or biogenesis	7.05e-08	1.02e-05	1014	3594	Common	2410089E03Rik,2700049A03Rik,3110043O21Rik,Aatf,Abca1,Abca5,Abcb1a,Abi1,Abi3bp,Ablim1,Acaca,Acan,Acp2,Actl6a,Actn1,Actr2,Adam8,Adamts2,Adamts9,Adamtsl4,Adarb1,Add1,Adgrg6,Adgrl3,Adipoq,Agfg1,Ago4,Agtpbp1,Ahi1,Ahnak,Ahr,Aif1,Aifm1,Ajuba,Akap8,Akt3,Alcam,Alkbh1,Alms1,Als2,Ank2,Ank3,Ankrd27,Ano6,Anxa2,Anxa7,Apc,App,Aqp1,Arhgap10,Arhgap35,Arhgap5,Arhgef2,Arhgef28,Arhgef5,Arhgef6,Arid1a,Arid1b,Arid4a,A…
GO:0006796	phosphate-containing compound metabolic process	7.17e-08	1.02e-05	321	3594	Common	Abhd12,Acaca,Acacb,Acot9,Acss1,Acss2,Acvr1b,Acvr2a,Adam10,Adcy3,Adcy4,Adcy5,Adcy6,Adcy7,Adcy9,Adk,Adss,Agk,Agpat1,Ajuba,Ampd2,App,Atm,Atp7a,Atr,Bad,Bid,Braf,Brd4,Btk,Btrc,Camk1,Camk2d,Camk2g,Cdk2,Cdk4,Cdk5,Cept1,Ces1d,Cfl1,Chpt1,Chuk,Clk1,Clk2,Clk3,Clk4,Cln8,Coasy,Coq9,Crot,Csf1r,Csk,Csnk1a1,Csnk1d,Csnk1e,Ctdspl2,Cttnbp2nl,Dab2,Dab2ip,Dapk1,Dclk1,Ddr1,Ddr2,Dgat1,Dgat2,Dguok,Dld,Dok1,Dtymk,Dusp3,D…
GO:0001568	blood vessel development	7.21e-08	1.02e-05	198	3594	Common	2410089E03Rik,Acvr1,Acvrl1,Adam8,Adamts6,Adamts9,Adgra2,Adipor2,Ahr,Angpt2,Antxr1,Anxa2,Ap2b1,Arid1a,Arid2,Atp7a,B4galt1,Becn1,Bmp4,Bmpr1a,Bmpr2,Casp8,Cav1,Ccl2,Ccm2,Cdh2,Cdh5,Chd7,Chm,Clec14a,Clic4,Cntrl,Col3a1,Ctgf,Ctnnb1,Cul7,Cx3cl1,Cxcl12,Cxcr4,Cyp1b1,Cyr61,Dctn5,Dicer1,Dll4,Dnm2,Dync2h1,Edn1,Efnb2,Eng,Enpep,Epas1,Epha2,Ephb3,Ephb4,Eya1,Fbxw7,Fbxw8,Fgf1,Fgfr1,Fgfr2,Flna,Flt1,Flt4,Foxo1,Fuz,Fz…
GO:0016569	covalent chromatin modification	8.3e-08	1.16e-05	77	3594	Common	Arid4a,Ash1l,Baz2a,Bmi1,Brd4,Brpf1,Carm1,Ctr9,Dnmt3a,Eed,Ehmt2,Ep300,Ezh2,Hdac1,Hdac2,Hdac3,Kat14,Kat2a,Kat2b,Kat6a,Kat6b,Kdm1a,Kdm1b,Kdm2b,Kdm3a,Kdm4c,Kdm5a,Kdm5b,Kdm5c,Kdm6a,Kdm6b,Kdm7a,Kmt2a,Kmt2b,Kmt2c,Kmt2d,Kmt5b,Ldb1,Map3k12,Mecp2,Ncoa1,Ncoa6,Nsd1,Nsd2,Pcgf3,Pcgf5,Per1,Per2,Phf2,Prmt2,Prmt5,Prmt7,Pwp1,Rbbp5,Rnf2,Rnf20,Rtf1,Satb1,Setd1a,Setd2,Setd5,Setdb1,Sfpq,Sirt1,Sirt2,Smarca4,Smyd2,Suz12…
GO:0016570	histone modification	8.74e-08	1.2e-05	75	3594	Common	Arid4a,Ash1l,Baz2a,Bmi1,Brd4,Brpf1,Carm1,Ctr9,Eed,Ehmt2,Ep300,Ezh2,Hdac1,Hdac2,Hdac3,Kat14,Kat2a,Kat2b,Kat6a,Kat6b,Kdm1a,Kdm1b,Kdm2b,Kdm3a,Kdm4c,Kdm5a,Kdm5b,Kdm5c,Kdm6a,Kdm6b,Kdm7a,Kmt2a,Kmt2b,Kmt2c,Kmt2d,Kmt5b,Ldb1,Map3k12,Mecp2,Ncoa1,Ncoa6,Nsd1,Nsd2,Pcgf3,Pcgf5,Per1,Per2,Phf2,Prmt2,Prmt5,Prmt7,Pwp1,Rbbp5,Rnf2,Rnf20,Rtf1,Satb1,Setd1a,Setd2,Setdb1,Sfpq,Sirt1,Sirt2,Smarca4,Smyd2,Suz12,Taf1,Tet2,Tr…
GO:0006793	phosphorus metabolic process	1.47e-07	1.99e-05	323	3594	Common	Abhd12,Acaca,Acacb,Acot9,Acss1,Acss2,Acvr1b,Acvr2a,Adam10,Adcy3,Adcy4,Adcy5,Adcy6,Adcy7,Adcy9,Adk,Adss,Agk,Agpat1,Ajuba,Ampd2,App,Atm,Atp7a,Atr,Bad,Bid,Braf,Brd4,Btk,Btrc,Camk1,Camk2d,Camk2g,Cdk2,Cdk4,Cdk5,Cept1,Ces1d,Cfl1,Chpt1,Chuk,Clk1,Clk2,Clk3,Clk4,Cln8,Coasy,Coq9,Crot,Csf1r,Csk,Csnk1a1,Csnk1d,Csnk1e,Ctdspl2,Cttnbp2nl,Dab2,Dab2ip,Dapk1,Dclk1,Ddr1,Ddr2,Dgat1,Dgat2,Dguok,Dld,Dok1,Dtymk,Dusp3,D…
GO:0016043	cellular component organization	2.27e-07	3.03e-05	1002	3594	Common	2410089E03Rik,2700049A03Rik,3110043O21Rik,Abca1,Abca5,Abcb1a,Abi1,Abi3bp,Ablim1,Acaca,Acan,Acp2,Actl6a,Actn1,Actr2,Adam8,Adamts2,Adamts9,Adamtsl4,Adarb1,Add1,Adgrg6,Adgrl3,Adipoq,Agfg1,Ago4,Agtpbp1,Ahi1,Ahnak,Ahr,Aif1,Aifm1,Ajuba,Akap8,Akt3,Alcam,Alkbh1,Alms1,Als2,Ank2,Ank3,Ankrd27,Ano6,Anxa2,Anxa7,Apc,App,Aqp1,Arhgap10,Arhgap35,Arhgap5,Arhgef2,Arhgef28,Arhgef5,Arhgef6,Arid1a,Arid1b,Arid4a,Arl13b…
GO:0072359	circulatory system development	2.85e-07	3.75e-05	333	3594	Common	2410089E03Rik,Acadm,Acan,Acvr1,Acvrl1,Adam15,Adam19,Adam8,Adamts1,Adamts6,Adamts9,Adgra2,Adgrg6,Adipor2,Adm,Ahr,Akap13,Angpt2,Anks6,Antxr1,Anxa2,Ap1b1,Ap2b1,Arhgef15,Arid1a,Arid2,Arl13b,Asxl2,Atf2,Atg5,Atg7,Atp7a,B4galt1,Becn1,Bicc1,Bmp4,Bmpr1a,Bmpr2,C2cd3,Calcrl,Casp8,Cav1,Cc2d2a,Ccl2,Ccm2,Cdh2,Cdh5,Cep290,Chd7,Chm,Clec14a,Clic4,Cntrl,Col14a1,Col3a1,Col4a3bp,Ctgf,Ctnnb1,Cul7,Cx3cl1,Cxcl12,Cxcr4,…
GO:0006508	proteolysis	3.64e-07	4.73e-05	139	3594	Common	1500015O10Rik,Abraxas2,Adam10,Adam17,Adam19,Adam9,Adamts2,Adamts7,Adamts9,Afg3l1,Agap3,Anapc10,Arrb1,Asb2,Ate1,Bace1,Bag6,Btrc,C2cd3,Capn1,Capn2,Capn7,Casp1,Casp3,Casp7,Ccdc47,Chfr,Cln3,Clock,Cndp2,Cpe,Ctsc,Ctsh,Ctsl,Ctss,Cul1,Cul4a,Cyld,Derl2,Dhcr24,Dld,Dnajb9,Dnajc10,Dnajc3,Dync2h1,Edem1,Edem3,Eif3f,Erap1,Ero1lb,Fbxl3,Fbxo6,Fbxw11,Fbxw7,Fkrp,Furin,Gli3,Gsk3a,Hdac6,Herpud1,Hspa5,Htra1,Htra2,Ift1…
GO:0031329	regulation of cellular catabolic process	5.19e-07	6.66e-05	124	3594	Common	3110043O21Rik,Abhd5,Acacb,Adam8,Adam9,Ago2,Anks1,Anxa2,Atg7,Atm,Atp13a2,Axin1,Bag6,Becn1,Brf1,Btrc,Casp1,Cdc37,Chfr,Chmp4b,Cidea,Clec16a,Cnot6l,Cnot7,Csnk1d,Csnk1e,Ctsa,Cttn,Dicer1,Edem1,Edem2,Ehmt2,Eif2ak4,Eif6,Elavl1,Fbxl5,Fbxo22,Fbxw7,Fmr1,Gba,Gclc,Gna12,Herc1,Herpud1,Hif1a,Hmgb1,Hmox1,Hnrnpd,Htra2,Idh1,Ier3,Ift20,Ift88,Il33,Irgm1,Lrig2,Lrpprc,Lrrk2,Map3k7,Mapkapk2,Mettl14,Mettl16,Mettl3,Mfn2,…
GO:0010638	positive regulation of organelle organization	6.77e-07	8.56e-05	109	3594	Common	Apc,Arhgap35,Arid5a,Arpc2,Asap1,Asxl2,Atm,Atmin,Atr,Atrx,Bbs4,Bcas3,Bok,Braf,C2cd5,Carmil1,Cdc37,Cenpe,Cep120,Cfl1,Clec16a,Ctnnb1,Ctr9,Ddhd2,Dkc1,Dlg1,Dstn,Dynll1,Eed,Eif4g3,Ercc1,Evl,Fam162a,Fmr1,Fuz,Gba,Gsk3a,Gsk3b,Hif1a,Hnrnpd,Htt,Igf1r,Insr,Irgm1,Itgb1bp1,Jarid2,Jmy,Kdm2a,Kmt2a,L3mbtl2,Lpar1,Lpin1,Lrrk2,Map3k1,Mapk8,Mapk9,Mecp2,Mfn2,Mief1,Mief2,Mlst8,Msn,Mtf2,Mtor,Mtss1,Mul1,Nabp2,Nckap1,Ncka…
GO:0007167	enzyme linked receptor protein signaling pathway	7.54e-07	9.41e-05	153	3594	Common	Acvr1,Acvr1b,Acvr2a,Acvrl1,Adam9,Ahi1,Angpt2,Anks1,Apc,Arid5b,Bcar1,Bmp4,Bmp6,Bmpr1a,Bmpr1b,Bmpr2,C2cd5,Caml,Chn1,Csf1r,Cspg4,Csrnp1,Ctgf,Dab2ip,Ddr1,Ddr2,Dusp22,Ecsit,Efna1,Egfr,Egr1,Eif2ak3,Eif4ebp1,Eif4ebp2,Epha2,Epha3,Fat4,Fgfr1,Fgfr2,Flrt2,Flt1,Foxo1,Fut8,Gab1,Gcnt2,Ghr,Gigyf2,Git1,Gsk3a,Gsk3b,Hexa,Hgf,Hipk2,Id1,Igf1,Insr,Iqgap1,Itgb3,Itgb5,Jade2,Jak1,Jak2,Kdr,Kif16b,Lnpep,Ltbp1,Ltbp3,Magi2,…
GO:0009968	negative regulation of signal transduction	8.38e-07	0.000103	275	3594	Common	Adar,Adgra2,Adipoq,Aida,Ankrd26,Apc,Arap3,Arhgap24,Arhgap35,Arhgap42,Arrb1,Arrb2,Arrdc3,Ash1l,Aspn,Atf3,Atm,Atxn1,Atxn7,Axin1,Bcl6,Bicd1,Bid,Bmp4,Bmper,Bok,Cav1,Cavin3,Cblb,Cd44,Cd59a,Cd74,Cdk11b,Chrd,Chrdl1,Cib1,Cidea,Clock,Cnksr3,Commd1,Creb3l1,Crebrf,Crtc3,Ctdspl2,Ctnna1,Ctnnb1,Cx3cl1,Cx3cr1,Dab2,Dab2ip,Dact1,Dapk1,Dhrs3,Dhx58,Dkk2,Dlg1,Dlg5,Dll4,Dmd,Dusp16,Dusp22,Dyrk1a,Ecm1,Efna1,Egr1,Erbin,…
GO:0051128	regulation of cellular component organization	1.08e-06	0.000132	456	3594	Common	3110043O21Rik,Abhd17b,Ace,Adcy6,Add1,Adgre5,Adgrl2,Adgrl3,Adnp2,Ago4,Ahi1,Ahr,Akap13,Ankrd27,Ano6,Antxr1,Anxa2,Anxa7,Apbb1,Apbb2,Apc,Arap3,Arf6,Arfgap1,Arhgap21,Arhgap24,Arhgap35,Arhgef15,Arhgef2,Arid5a,Arpc2,Asap1,Asxl2,Atad1,Atg3,Atg5,Atg7,Atm,Atmin,Atp13a2,Atp8a1,Atr,Atrx,Baiap2,Bbs4,Bcas3,Bdnf,Becn1,Bid,Bmpr2,Bnip3,Bok,Braf,C2cd5,C3,Caprin1,Capza1,Capzb,Carmil1,Cav1,Cbll1,Ccdc88a,Ccl2,Cd14,Cd…
GO:0070727	cellular macromolecule localization	1.14e-06	0.000137	214	3594	Common	2410089E03Rik,Agap3,Ahcyl1,Ahi1,Ajuba,Ank2,Ank3,Ap1b1,Ap1g1,Ap1m1,Ap2a1,Ap2m1,Ap3b1,Ap4e1,Ap4m1,Ap4s1,Arf6,Arl6ip1,Armcx3,Atg9a,Atrx,Bag1,Banp,Bax,Bbs2,Bbs4,Bcr,Bicd2,Bid,Brca2,C2cd3,C2cd5,Carm1,Casc3,Cc2d2a,Cd74,Cdc42,Cdh2,Cdk5,Cep57,Cep63,Ciz1,Clip1,Cln3,Csnk1e,Ctnna1,Ctnnb1,Cttn,Daxx,Dbn1,Dchs1,Dennd4c,Derl2,Dmd,Dnaja3,Dnm1l,Dvl2,Dync2h1,Ehd3,Emp2,Epb41l3,Erbin,Etv5,Exoc5,Eya1,Ezh2,Fbln5,Fcho2…
GO:0010243	response to organonitrogen compound	1.43e-06	0.00017	158	3594	Common	Adcy6,Adgrl3,Apc,Bcl2l1,C2cd5,C5ar1,Capn10,Capn2,Casp1,Ccdc47,Cd36,Cd81,Cd9,Cdk4,Cdk5,Cebpb,Cfl1,Col16a1,Col1a2,Col3a1,Col4a1,Col5a2,Col6a1,Cpeb1,Cpeb4,Creb1,Crem,Dennd4c,Derl2,Dnajb9,Dnajc10,Dnmt1,Dnmt3a,Edem1,Edem3,Egfr,Egr1,Ehmt2,Eif4ebp1,Eif4ebp2,Eif6,Ezh2,Fbxo6,Fcgr2b,Foxo1,Ghr,Gsk3a,Gsk3b,Hadha,Hdac2,Hdac5,Homer1,Hprt,Igf1,Igf1r,Impact,Inpp5k,Inppl1,Insr,Ipo5,Irak1,Irak3,Irs1,Itgb1,Itgb2,It…
GO:0034976	response to endoplasmic reticulum stress	1.5e-06	0.000176	53	3594	Common	Aifm1,Apaf1,Atf3,Bag6,Ccdc47,Cebpb,Col4a3bp,Creb3l1,Dab2ip,Ddrgk1,Derl2,Dnajb9,Dnajc10,Dnajc3,Edem1,Edem3,Eif2ak3,Eif2ak4,Eif2s1,Ep300,Ern1,Ero1l,Fam129a,Fbxo6,Gsk3b,Herpud1,Hspa5,Itpr1,Map3k5,Nfe2l2,Nrros,Pik3r1,Pml,Ppp1r15a,Ppp1r15b,Ppp2cb,Ptpn1,Rhbdd1,Sel1l,Serp1,Srpx,Syvn1,Thbs1,Tmbim6,Tor1a,Trp53,Ube2g2,Ube2j1,Ube4b,Ufm1,Vcp,Wfs1,Xbp1
GO:0034248	regulation of cellular amide metabolic process	2.13e-06	0.000246	76	3594	Common	Aars,Aco1,App,Bin1,Clu,Cnot6l,Cpeb1,Cpeb2,Ctsa,Cyfip1,Cyr61,Dnajc1,Dnajc3,Eif2ak1,Eif2ak3,Eif2ak4,Eif2s1,Eif4e,Eif4ebp1,Eif4ebp2,Eif4enif1,Eif4g2,Eif4g3,Eif6,Elavl1,Eprs,Fam129a,Fech,Fmr1,Fxr1,Gapdh,Gsap,Gtpbp2,Ilf3,Impact,Ireb2,Lrpprc,Mettl14,Mettl16,Mettl3,Nfe2l2,Nsun4,Ormdl3,Paip2,Pdk1,Pdk2,Pdk4,Per1,Per2,Picalm,Pink1,Ppp1r15a,Ppp1r15b,Qk,Rara,Rbm3,Rbm4,Rbm4b,Rbms3,Rc3h1,Rock2,Rpl13a,Rpl38,Rpl…
GO:0034613	cellular protein localization	2.32e-06	0.000265	211	3594	Common	2410089E03Rik,Agap3,Ahcyl1,Ahi1,Ajuba,Ank2,Ank3,Ap1b1,Ap1g1,Ap1m1,Ap2a1,Ap2m1,Ap3b1,Ap4e1,Ap4m1,Ap4s1,Arf6,Arl6ip1,Armcx3,Atg9a,Atrx,Bag1,Banp,Bax,Bbs2,Bbs4,Bcr,Bicd2,Bid,Brca2,C2cd3,C2cd5,Carm1,Cc2d2a,Cd74,Cdc42,Cdh2,Cdk5,Cep57,Cep63,Ciz1,Clip1,Cln3,Csnk1e,Ctnna1,Ctnnb1,Cttn,Daxx,Dbn1,Dchs1,Dennd4c,Derl2,Dmd,Dnaja3,Dnm1l,Dvl2,Dync2h1,Ehd3,Emp2,Epb41l3,Erbin,Etv5,Exoc5,Eya1,Ezh2,Fbln5,Fcho2,Fermt…
GO:0048514	blood vessel morphogenesis	2.66e-06	0.0003	147	3594	Common	Acvr1,Acvrl1,Adam8,Adamts9,Adgra2,Adipor2,Ahr,Angpt2,Anxa2,Arid2,B4galt1,Becn1,Bmp4,Bmpr1a,Bmpr2,Casp8,Cav1,Ccl2,Ccm2,Cdh2,Chd7,Clec14a,Clic4,Col3a1,Ctgf,Ctnnb1,Cul7,Cx3cl1,Cxcl12,Cxcr4,Cyp1b1,Cyr61,Dicer1,Dll4,Edn1,Efnb2,Eng,Enpep,Epas1,Epha2,Ephb3,Ephb4,Eya1,Fbxw7,Fgf1,Fgfr1,Fgfr2,Flna,Flt1,Flt4,Fzd4,Gja1,Gja5,Gna13,Gpx1,Hand2,Hdac7,Hif1a,Itga7,Itgb1,Jag1,Jam3,Jmjd6,Jun,Kat6a,Kctd10,Kdr,Lemd3,L…
GO:0006511	ubiquitin-dependent protein catabolic process	3.1e-06	0.000345	59	3594	Common	1500015O10Rik,Agap3,Anapc10,Arrb1,Asb2,Ate1,Bag6,Btrc,Ccdc47,Chfr,Clock,Cul1,Cul4a,Dnajb9,Dnajc10,Edem1,Edem3,Fbxl3,Fbxo6,Fbxw11,Fbxw7,Gsk3a,Hdac6,Herpud1,Itch,Mylip,Nedd4,Nrros,Otud5,Plaa,Ppp1r11,Ppp2cb,Psmb5,Rbbp6,Rlim,Rnf111,Rnf34,Rnf6,Siah1a,Skp1a,Spop,Syvn1,Tbl1xr1,Uba6,Ube2g2,Ube2j1,Ube2l3,Ube2w,Ube3a,Ube4b,Ubr1,Ubr2,Ubr3,Wfs1,Wwp1,Wwp2,Wwtr1,Xbp1,Znrf1
GO:0002376	immune system process	3.33e-06	0.000367	490	3594	Common	Abi1,Ace,Adam17,Adam8,Adar,Add1,Agbl5,Ahctf1,Ahr,Aimp1,Angpt2,Ano6,Anxa1,Ap3b1,Apbb1ip,Apc,Arhgef5,Arid4a,Arl11,Atad5,Atg5,Atg9a,Atm,Atp7a,Axin1,Axl,Azi2,B2m,B4galt1,Bag6,Bak1,Bap1,Bax,Bcl10,Bcl3,Bcl6,Bcr,Bmi1,Bmp4,Braf,Brca2,Btk,C1qa,C3,C4b,C5ar1,Cacnb3,Capg,Casp3,Casp8,Cblb,Ccl2,Ccnd3,Ccr1,Cd109,Cd14,Cd180,Cd1d1,Cd248,Cd300lf,Cd34,Cd47,Cd48,Cd74,Cd86,Cd99l2,Cdc42,Cdk6,Cebpb,Cebpg,Chd2,Chst3,Chu…
GO:1901699	cellular response to nitrogen compound	3.68e-06	0.0004	110	3594	Common	Adar,Adcy6,Ago2,Apc,Atrx,Bcl2l1,C2cd5,Capn10,Capn2,Cdk4,Cebpb,Col16a1,Col1a2,Col3a1,Col4a1,Col5a2,Col6a1,Cpeb1,Cpeb4,Dennd4c,Dicer1,Dnmt1,Dnmt3a,Drosha,Egfr,Ehmt2,Eif4ebp1,Eif4ebp2,Ezh2,Fcgr2b,Fmr1,Foxo1,Ghr,Gnai2,Gsk3a,Gsk3b,Hdac2,Igf1,Igf1r,Impact,Inpp5k,Insr,Ipo5,Irs1,Itpr2,Jak2,Lpin1,Map3k5,Mapk8,Mef2c,Mmp2,Myo5a,Ndel1,Nfkb1,Nr4a1,Nr4a2,Ntrk2,P2rx7,Pde4b,Pde4d,Pdgfc,Pdgfd,Pdgfra,Pdk2,Pdk4,Phi…
GO:1901565	organonitrogen compound catabolic process	5.14e-06	0.000553	127	3594	Common	1500015O10Rik,Abhd12,Abhd13,Abhd17b,Acadl,Agap3,Anapc10,Arrb1,Asb2,Ate1,Atg7,Axin1,Bag6,Bckdhb,Btrc,Ccdc47,Cdo1,Cemip,Chfr,Cln8,Clock,Csad,Ctss,Cul1,Cul2,Cul4a,Dennd3,Derl2,Dnajb9,Dnajc10,Dnajc3,Dpyd,Edem1,Edem3,Enpp2,Fah,Fbxl3,Fbxo6,Fbxw11,Fbxw7,Galc,Gba,Gla,Gls,Gm2a,Got1,Got2,Gsk3a,Gstz1,Hdac6,Herpud1,Hexa,Hexb,Hspa5,Itch,Itpa,Lamp2,Lgmn,Lnpep,Lypla1,Lypla2,Lyve1,Manba,Maoa,Mlycd,Mylip,Nedd4,Ng…
GO:0010498	proteasomal protein catabolic process	5.58e-06	0.000593	42	3594	Common	1500015O10Rik,Agap3,Anapc10,Btrc,Ccdc47,Clock,Cul1,Cul4a,Derl2,Dnajb9,Dnajc10,Edem1,Edem3,Fbxl3,Fbxo6,Fbxw11,Fbxw7,Gsk3a,Nr1d1,Nrros,Otud5,Ppp2cb,Prpf19,Psmb5,Psme4,Rhbdd1,Rnf34,Sel1l,Siah1a,Skp1a,Syvn1,Tbl1xr1,Tor1a,Ube2g2,Ube2j1,Ube2w,Vcp,Wfs1,Wwp1,Wwp2,Wwtr1,Znrf1
GO:0010506	regulation of autophagy	5.68e-06	0.000597	50	3594	Common	3110043O21Rik,Atm,Becn1,Casp1,Cdc37,Chmp4b,Clec16a,Ctsa,Cttn,Ehmt2,Eif2ak4,Gba,Herc1,Hif1a,Hmgb1,Hmox1,Htra2,Ift20,Ift88,Irgm1,Lrrk2,Map3k7,Mfn2,Mtm1,Mtor,Mul1,Nod1,Npc1,Parl,Poldip2,Prkaa1,Ptk2,Pycard,Rab12,Ripk2,Sh3glb1,Sirt1,Smcr8,Smurf1,Soga1,Tbk1,Tigar,Tlr2,Trp53,Tsc2,Tspo,Vdac1,Washc1,Xbp1,Zc3h12a
GO:0016571	histone methylation	5.9e-06	0.000611	33	3594	Common	Arid4a,Ash1l,Baz2a,Carm1,Ctr9,Eed,Ehmt2,Ezh2,Hdac2,Kdm3a,Kmt2a,Kmt2b,Kmt2c,Kmt2d,Kmt5b,Mecp2,Ncoa6,Nsd1,Nsd2,Prmt2,Prmt5,Prmt7,Pwp1,Rbbp5,Rtf1,Satb1,Setd1a,Setd2,Setdb1,Smyd2,Suz12,Tet2,Wdr82
GO:0043632	modification-dependent macromolecule catabolic process	6.06e-06	0.000611	61	3594	Common	1500015O10Rik,Agap3,Anapc10,Arrb1,Asb2,Ate1,Bag6,Btrc,Ccdc47,Chfr,Clock,Cul1,Cul4a,Dnajb9,Dnajc10,Edem1,Edem3,Fbxl3,Fbxo6,Fbxw11,Fbxw7,Gsk3a,Hdac6,Herpud1,Itch,Mylip,Nedd4,Nrros,Otud5,Plaa,Ppp1r11,Ppp2cb,Psmb5,Rbbp6,Rlim,Rnf111,Rnf34,Rnf6,Siah1a,Skp1a,Spop,Syvn1,Tbl1xr1,Uba6,Uba7,Ube2g2,Ube2j1,Ube2l3,Ube2w,Ube3a,Ube4b,Ubr1,Ubr2,Ubr3,Wfs1,Wwp1,Wwp2,Wwtr1,Xbp1,Zmpste24,Znrf1
GO:0019941	modification-dependent protein catabolic process	6.06e-06	0.000611	61	3594	Common	1500015O10Rik,Agap3,Anapc10,Arrb1,Asb2,Ate1,Bag6,Btrc,Ccdc47,Chfr,Clock,Cul1,Cul4a,Dnajb9,Dnajc10,Edem1,Edem3,Fbxl3,Fbxo6,Fbxw11,Fbxw7,Gsk3a,Hdac6,Herpud1,Itch,Mylip,Nedd4,Nrros,Otud5,Plaa,Ppp1r11,Ppp2cb,Psmb5,Rbbp6,Rlim,Rnf111,Rnf34,Rnf6,Siah1a,Skp1a,Spop,Syvn1,Tbl1xr1,Uba6,Uba7,Ube2g2,Ube2j1,Ube2l3,Ube2w,Ube3a,Ube4b,Ubr1,Ubr2,Ubr3,Wfs1,Wwp1,Wwp2,Wwtr1,Xbp1,Zmpste24,Znrf1
GO:0050794	regulation of cellular process	6.07e-06	0.000611	2094	3594	Common	2700049A03Rik,3110043O21Rik,Aamdc,Aars,Aatf,Abca5,Abhd17b,Abhd2,Abhd5,Ablim1,Abr,Abraxas2,Acacb,Acadl,Acadm,Acadvl,Ace,Aco1,Acsl4,Acvr1,Acvr1b,Acvr2a,Acvrl1,Adam10,Adam17,Adam8,Adam9,Adamts9,Adar,Adcy3,Adcy4,Adcy6,Adcy9,Add1,Adgra2,Adgre5,Adgrf5,Adgrg1,Adgrg6,Adgrl2,Adgrl3,Adipoq,Adipor2,Adm,Adnp2,Aebp1,Aebp2,Aff1,Ago1,Ago2,Ago4,Ahctf1,Ahcyl1,Ahi1,Ahnak,Ahr,Aida,Aif1,Aifm1,Aimp1,Ajuba,Akap12,Akap…
GO:0016310	phosphorylation	6.82e-06	0.000679	183	3594	Common	Acvr1b,Acvr2a,Adam10,Agk,App,Atm,Atr,Bid,Braf,Brd4,Btk,Camk1,Camk2d,Camk2g,Cdk2,Cdk4,Cdk5,Cfl1,Chuk,Clk1,Clk2,Clk3,Clk4,Coq9,Csf1r,Csk,Csnk1a1,Csnk1d,Csnk1e,Dab2,Dab2ip,Dapk1,Dclk1,Ddr1,Ddr2,Dguok,Dld,Dok1,Dyrk1a,Egfr,Eif2a,Eif2ak3,Eif2ak4,Eif2s1,Ern1,Fam20c,Fgr,Fuk,Fyn,Gab1,Galk1,Galt,Gnptab,Gpi1,Gsk3a,Gsk3b,Hacd3,Hipk2,Hipk3,Hk1,Hk2,Hsf1,Hus1,Ick,Igf1r,Ikbkb,Ilf3,Insr,Irak1,Irak3,Itgav,Jak1,Jak…
GO:0006412	translation	6.99e-06	0.000689	35	3594	Common	Aars,Cdkal1,Dhx33,Eef2k,Eif2a,Eif2ak3,Eif2s1,Eif3a,Eif3b,Eif3c,Eif3d,Eif3e,Eif3f,Eif3h,Eif3i,Eif3k,Eif3l,Eif3m,Eif4ebp1,Eprs,Gars,Gtpbp2,Iars,Lars,Mars,Mrpl51,Rack1,Rars,Rbm3,Rpl24,Secisbp2,Sepsecs,Tars,Trnau1ap,Wars
GO:0051716	cellular response to stimulus	8.39e-06	0.000818	1002	3594	Common	1500015O10Rik,2700049A03Rik,Abca1,Abtb2,Acaca,Acvr1,Acvr1b,Acvr2a,Acvrl1,Adam10,Adam8,Adam9,Adar,Adcy3,Adcy4,Adcy6,Adcy9,Add1,Adgrg6,Adh5,Adipoq,Adipor2,Adnp2,Adprhl2,Agap3,Ago2,Ahi1,Ahr,Aif1,Aifm1,Akap12,Akap13,Akap8,Alms1,Angpt2,Ank2,Ank3,Ankrd1,Ankrd27,Anks1,Ano6,Anxa1,Anxa2,Anxa4,Anxa6,Apaf1,Apbb1,Apc,App,Arhgap31,Arhgap35,Arhgef5,Arhgef9,Arid5a,Arid5b,Arl13b,Arl3,Arrb1,Atf2,Atf3,Atg13,Atg14,…
GO:0007169	transmembrane receptor protein tyrosine kinase signaling pathway	8.85e-06	0.000854	101	3594	Common	Ahi1,Angpt2,Anks1,Apc,Arid5b,Bcar1,Bmpr2,C2cd5,Caml,Chn1,Csf1r,Cspg4,Csrnp1,Ctgf,Dab2ip,Ddr1,Ddr2,Efna1,Egfr,Eif2ak3,Eif4ebp1,Eif4ebp2,Epha2,Epha3,Fat4,Fgfr1,Fgfr2,Flrt2,Flt1,Foxo1,Gab1,Ghr,Gigyf2,Git1,Gsk3a,Gsk3b,Hgf,Igf1,Insr,Iqgap1,Itgb3,Jak2,Kdr,Kif16b,Met,Myo1e,Nck1,Nck2,Ndel1,Ndn,Ndst1,Nrp1,Ntrk2,Pdgfb,Pdgfc,Pdgfra,Pdgfrb,Pdk2,Pdk4,Phip,Plat,Plcb1,Plekha1,Ptk2b,Ptpn1,Ptpn11,Ptpn2,Ptpra,Rab1…
GO:0051247	positive regulation of protein metabolic process	9.21e-06	0.000878	301	3594	Common	Ace,Acvr1,Adam8,Adam9,Adipoq,Ajuba,Antxr1,Apaf1,Apc,Arid5a,Arnt,Arrb1,Arrb2,Asxl2,Atg14,Atg7,Atp6ap1,Axin1,Bad,Bak1,Bax,Bcar3,Bcl10,Bcl3,Bdnf,Bid,Bmp4,Bmp6,Bnip2,Bok,Braf,C1qtnf1,C1qtnf2,C3,Cab39,Casp8,Casp8ap2,Casp9,Cavin3,Cblb,Ccdc88a,Cd1d1,Cd36,Cd44,Cd74,Cd84,Cdc42,Cdk5,Cdon,Cebpg,Cenpe,Chfr,Cib1,Clip3,Cln3,Clu,Cnpy2,Crebl2,Csf1r,Csnk1d,Csnk1e,Cspg4,Ctnnd1,Ctr9,Cul4b,Cxcr4,Dab2,Dab2ip,Dhx33,Dl…
GO:0006325	chromatin organization	9.28e-06	0.000878	110	3594	Common	Actl6a,Arid1a,Arid4a,Ash1l,Baz1a,Baz1b,Baz2a,Bmi1,Brd4,Brpf1,Carm1,Cebpg,Chd3,Chd7,Ctnnb1,Ctr9,Daxx,Dicer1,Dnmt3a,Eed,Ehmt2,Ep300,Ezh2,Hdac1,Hdac2,Hdac3,Hdac5,Hdac7,Hdac8,Hdac9,Hmgb1,Hmgn1,Kat14,Kat2a,Kat2b,Kat6a,Kat6b,Kdm1a,Kdm1b,Kdm2b,Kdm3a,Kdm4c,Kdm5a,Kdm5b,Kdm5c,Kdm6a,Kdm6b,Kdm7a,Kmt2a,Kmt2b,Kmt2c,Kmt2d,Kmt5b,Ldb1,Map3k12,Mcm2,Mecp2,Mta2,Nap1l4,Nasp,Ncoa1,Ncoa6,Nsd1,Nsd2,Nucks1,Pcgf3,Pcgf5,Pe…
GO:0016192	vesicle-mediated transport	9.67e-06	0.000905	176	3594	Common	Abca1,Ahi1,Aif1,Als2,Amph,Anxa1,Ap1b1,Ap1g1,Ap1m1,Ap1s1,Ap1s2,Ap2a1,Ap2b1,Ap2m1,Ap3b1,Ap3m1,Ap3m2,Ap4e1,Ap4m1,Ap4s1,App,Arcn1,Arf1,Axl,Bcap31,Becn1,Bet1,Bicd2,Bloc1s5,Bloc1s6,C2cd5,C3,Cacna1c,Canx,Cap1,Cav1,Cav2,Cd14,Cd36,Cd47,Cd81,Cd9,Cdc42,Cdk16,Chmp5,Clcn3,Cln3,Coro1a,Coro1c,Creb3l2,Ctnnb1,Dab2,Dennd1a,Dennd1b,Dnajc6,Dock2,Dysf,Eif2ak1,Elmo1,Emp2,Erc1,Ezr,Fcgr1,Fcgr2b,Fgfr2,Flna,Gak,Gosr2,Gpr1…
GO:0071417	cellular response to organonitrogen compound	9.88e-06	0.000916	96	3594	Common	Adcy6,Apc,Bcl2l1,C2cd5,Capn10,Capn2,Cdk4,Cebpb,Col16a1,Col1a2,Col3a1,Col4a1,Col5a2,Col6a1,Cpeb1,Cpeb4,Dennd4c,Dnmt1,Dnmt3a,Egfr,Ehmt2,Eif4ebp1,Eif4ebp2,Ezh2,Fcgr2b,Foxo1,Ghr,Gsk3a,Gsk3b,Hdac2,Igf1,Igf1r,Impact,Inpp5k,Insr,Ipo5,Irs1,Itpr2,Jak2,Lpin1,Mef2c,Mmp2,Myo5a,Ndel1,Nr4a1,Nr4a2,Ntrk2,Pde4b,Pde4d,Pdgfc,Pdgfd,Pdgfra,Pdk2,Pdk4,Phip,Pik3cg,Pik3r1,Plcb1,Pparg,Ppp1r9b,Prkci,Ptpn1,Ptpn2,Ptpn22,Ptpr…
GO:1902532	negative regulation of intracellular signal transduction	1.07e-05	0.000985	117	3594	Common	Adipoq,Aida,Ankrd26,Apc,Arap3,Arhgap24,Arhgap35,Arhgap42,Arrdc3,Ash1l,Atf3,Atm,Bcl6,Bid,Cav1,Cavin3,Cd44,Cd74,Cib1,Cnksr3,Creb3l1,Crtc3,Dact1,Dhx58,Dlg1,Dlg5,Dmd,Dusp16,Dyrk1a,Efna1,Erbin,Fbxw11,Flcn,Fnip1,G2e3,Ggnbp2,Gpx1,Grina,Gsk3a,Hif1a,Hipk3,Hspb1,Hsph1,Hyou1,Igf1r,Inpp5k,Irak3,Itch,Ivns1abp,Lemd2,Litaf,Lmbrd1,Lyn,Mapk7,Mapk8ip1,Mif,Mtm1,Mtor,Ncor1,Ndrg2,Nf1,Nf2,Nlrx1,Opa1,Optn,Otud7b,P2rx7,…
GO:0070647	protein modification by small protein conjugation or removal	1.09e-05	0.00099	91	3594	Common	Abraxas2,Arrdc4,Asb2,Atg7,Axin1,Bmi1,Btrc,Cbx4,Chfr,Cyld,Eif3f,Eya1,Fbxl3,Fbxo22,Fbxo25,Fbxw11,Fem1b,G2e3,Hdac6,Hectd1,Herc4,Itch,Jade2,Klhl2,Ltn1,March1,March8,Mgrn1,Nedd4,Otud4,Otud7b,Otulin,Pcgf3,Pcgf5,Pdzrn3,Peli1,Pias1,Pias2,Pias3,Pja1,Rlim,Rnf111,Rnf115,Rnf13,Rnf149,Rnf2,Rnf20,Rnf220,Rnf25,Rnf31,Rnf41,Rnf6,Senp1,Senp2,Smurf1,Stambp,Sumo3,Suz12,Taz,Tnfaip3,Traf6,Trim24,Trim3,Trim32,Trim37,Ub…
GO:0006417	regulation of translation	1.1e-05	0.000993	63	3594	Common	Aars,Aco1,App,Cnot6l,Cpeb1,Cpeb2,Cyfip1,Dnajc1,Dnajc3,Eif2ak1,Eif2ak3,Eif2ak4,Eif2s1,Eif4e,Eif4ebp1,Eif4ebp2,Eif4enif1,Eif4g2,Eif4g3,Eif6,Elavl1,Eprs,Fam129a,Fech,Fmr1,Fxr1,Gapdh,Gtpbp2,Ilf3,Impact,Ireb2,Lrpprc,Mettl14,Mettl16,Mettl3,Nsun4,Paip2,Per1,Per2,Pink1,Ppp1r15a,Ppp1r15b,Qk,Rara,Rbm3,Rbm4,Rbm4b,Rbms3,Rc3h1,Rpl13a,Rpl38,Rplp1,Secisbp2,Sepsecs,Serp1,Tarbp2,Tia1,Trnau1ap,Zc3h12a,Zfp36,Zfp36l…
GO:0006979	response to oxidative stress	1.19e-05	0.00106	73	3594	Common	Adipoq,Adnp2,Adprhl2,Agap3,Aifm1,Als2,Apod,Atg7,Atp13a2,Atp7a,Cat,Cd36,Cln8,Cpeb2,Cryab,Cyp1b1,Epas1,Etfdh,Ezh2,Foxo1,Foxo3,G6pdx,Gab1,Gclm,Gpx1,Hif1a,Htra2,Idh1,Impact,Itgav,Kdm6b,Kpna4,Lias,Lig1,Map3k5,Mapk8,Mpv17,Mtf1,Nfe2l2,Nr4a2,Oxr1,Park7,Parp1,Pink1,Pml,Ppp1r15b,Ppp2cb,Prdx1,Prdx3,Prdx6,Prkaa1,Prkra,Prnp,Psen1,Psip1,Psmb5,Rad52,Rrm2b,Rwdd1,Selenon,Sirt2,Sod1,Sod2,Src,Srxn1,Thbs1,Tnfaip3,Tr…
GO:0007507	heart development	1.24e-05	0.0011	229	3594	Common	2410089E03Rik,Acadm,Acan,Acvr1,Acvrl1,Adam15,Adam19,Adamts1,Adamts6,Adamts9,Adgrg6,Adm,Ahr,Akap13,Anks6,Ap1b1,Ap2b1,Arid1a,Arid2,Arl13b,Asxl2,Atf2,Atg5,Atg7,Bicc1,Bmp4,Bmpr1a,Bmpr2,C2cd3,Calcrl,Casp8,Cc2d2a,Ccm2,Cep290,Chd7,Cntrl,Col14a1,Col4a3bp,Ctnnb1,Cxcr4,Cyr61,Dchs1,Dctn5,Dhrs3,Dicer1,Dlc1,Dll4,Dnm2,Dvl2,Dync2h1,Edn1,Efna1,Egln1,Eng,Ep300,Epha3,Ephb4,Erbb2,Erg,Eya1,Fat4,Fgf1,Fgfr1,Fgfr2,Fgfr…
GO:0042176	regulation of protein catabolic process	1.49e-05	0.00131	74	3594	Common	Adam8,Adam9,Anks1,Anxa2,Apc,Atg7,Atp13a2,Axin1,Bag6,Banp,Btrc,Cblb,Cdc42,Chfr,Clec16a,Csnk1d,Csnk1e,Ctsa,Cul4b,Dab2ip,Edem1,Edem2,Fbxl5,Fbxo22,Fbxw7,Fmr1,Fyn,Gba,Gclc,Gna12,Herpud1,Ier3,Il33,Irak3,Itch,Lrig2,Lrp1,Lrrk2,Mtm1,Mycbp2,Mylip,N4bp1,Ndfip1,Nedd4,Nos2,Oaz2,Odc1,Ophn1,Park7,Pias1,Psen1,Psen2,Ptk2,Ptk2b,Rgma,Rpl11,Samd9l,Sco1,Senp1,Serpine2,Sgsm3,Sirt2,Sox9,Sumo3,Tmf1,Tnfaip3,Trib1,Trib2,T…
GO:0032956	regulation of actin cytoskeleton organization	1.61e-05	0.0014	62	3594	Common	3110043O21Rik,Akap13,Arhgap35,Arpc2,Bbs4,Bcas3,Braf,Capza1,Capzb,Carmil1,Cfl1,Coro1a,Csf1r,Dixdc1,Dlg1,Dstn,Eps8,Evl,Fgr,Flna,Gsn,Hdac2,Itgb1bp1,Itgb3,Jam3,Jmy,Lpar1,Lrp1,Map3k1,Mef2c,Mlst8,Mtor,Mtss1,Myo1f,Nckap1,Nckap1l,Pfn2,Pik3r1,Plek,Plekhh2,Ppfia1,Prkcd,Prkce,Ptger4,Ptk2b,Pycard,Rac1,Rhoa,Rictor,Sh3pxd2b,Shank3,Smad4,Specc1l,Swap70,Synpo,Taok2,Tgfb2,Ttc8,Twf1,Twf2,Washc1,Wasl
GO:0010468	regulation of gene expression	1.64e-05	0.00141	857	3594	Common	Aamdc,Aars,Ablim1,Acacb,Ace,Aco1,Acvr1,Acvr1b,Acvr2a,Acvrl1,Adam8,Adar,Adipoq,Aebp1,Aebp2,Aff1,Ago1,Ago2,Ahctf1,Ahcyl1,Ahi1,Ahnak,Ahr,Ajuba,Akirin2,Alkbh1,Ank2,Ankrd1,Apbb1,Apbb2,App,Arid1a,Arid5b,Arnt,Arntl2,Arrb2,Ash1l,Asxl2,Atf3,Atf6,Atf7ip,Atm,Atmin,Atoh8,Atp1b1,Atp7a,Atrx,Atxn1,Atxn7,Auh,Axin1,Bach1,Bag1,Banp,Baz2a,Bbs2,Bbs4,Bcl10,Bcl3,Bcl6,Bcor,Bhlhe40,Bmi1,Bmp3,Bmp4,Bmp6,Bmper,Bmpr1a,Bmpr1…
GO:0032270	positive regulation of cellular protein metabolic process	1.68e-05	0.00143	272	3594	Common	Ace,Acvr1,Adam8,Adam9,Adipoq,Ajuba,Antxr1,Apaf1,Arid5a,Arnt,Arrb1,Arrb2,Asxl2,Atg14,Atg7,Atp6ap1,Axin1,Bad,Bak1,Bax,Bcar3,Bcl10,Bdnf,Bid,Bmp4,Bmp6,Bnip2,Bok,Braf,C1qtnf1,C1qtnf2,C3,Cab39,Casp8,Casp8ap2,Casp9,Cavin3,Ccdc88a,Cd36,Cd44,Cd74,Cd84,Cdc42,Cdk5,Cdon,Cenpe,Chfr,Cib1,Clip3,Cln3,Crebl2,Csf1r,Csnk1d,Csnk1e,Cspg4,Ctnnd1,Ctr9,Cxcr4,Dab2,Dab2ip,Dhx33,Dlg1,Dnajc3,Dusp22,Dvl2,Dyrk1a,Edem1,Edem2,E…
GO:0010648	negative regulation of cell communication	1.74e-05	0.00145	286	3594	Common	Adar,Adgra2,Adipoq,Aida,Ankrd26,Apc,Arap3,Arhgap24,Arhgap35,Arhgap42,Arrb1,Arrb2,Arrdc3,Ash1l,Aspn,Atad1,Atf3,Atm,Atxn1,Atxn7,Axin1,Bcl6,Bdnf,Bicd1,Bid,Bmp4,Bmper,Bok,Braf,Cav1,Cavin3,Cblb,Cd44,Cd59a,Cd74,Cdk11b,Chrd,Chrdl1,Cib1,Cidea,Clock,Cnksr3,Commd1,Creb3l1,Crebrf,Crtc3,Ctdspl2,Ctnna1,Ctnnb1,Cx3cl1,Cx3cr1,Dab2,Dab2ip,Dact1,Dapk1,Dhrs3,Dhx58,Dkk2,Dlg1,Dlg5,Dll4,Dmd,Dusp16,Dusp22,Dyrk1a,Ecm1,E…
GO:0023057	negative regulation of signaling	1.74e-05	0.00145	286	3594	Common	Adar,Adgra2,Adipoq,Aida,Ankrd26,Apc,Arap3,Arhgap24,Arhgap35,Arhgap42,Arrb1,Arrb2,Arrdc3,Ash1l,Aspn,Atad1,Atf3,Atm,Atxn1,Atxn7,Axin1,Bcl6,Bdnf,Bicd1,Bid,Bmp4,Bmper,Bok,Braf,Cav1,Cavin3,Cblb,Cd44,Cd59a,Cd74,Cdk11b,Chrd,Chrdl1,Cib1,Cidea,Clock,Cnksr3,Commd1,Creb3l1,Crebrf,Crtc3,Ctdspl2,Ctnna1,Ctnnb1,Cx3cl1,Cx3cr1,Dab2,Dab2ip,Dact1,Dapk1,Dhrs3,Dhx58,Dkk2,Dlg1,Dlg5,Dll4,Dmd,Dusp16,Dusp22,Dyrk1a,Ecm1,E…
GO:0009896	positive regulation of catabolic process	1.77e-05	0.00145	80	3594	Common	Abhd5,Adam8,Adam9,Ago2,Apc,Atg7,Axin1,Cblb,Cdc37,Chfr,Clec16a,Cnot6l,Cnot7,Csnk1d,Csnk1e,Cul4b,Dab2ip,Edem1,Edem2,Eif2ak4,Fbxl5,Fbxo22,Fbxw7,Fmr1,Gba,Gclc,Hif1a,Hmgb1,Hmox1,Ier3,Il33,Irgm1,Itch,Lrp1,Lrrk2,Map3k7,Mettl14,Mettl16,Mettl3,Mfn2,Mlxipl,Mul1,Mylip,Ndfip1,Nedd4,Nod1,Oaz2,Pabpc1,Pias1,Prkaa1,Prkce,Psen1,Psen2,Ptk2,Ptk2b,Qk,Rab12,Rc3h1,Rgma,Ripk2,Sgsm3,Sh3glb1,Sirt1,Sirt2,Smurf1,Sox9,Sumo3…
GO:0006950	response to stress	1.77e-05	0.00145	566	3594	Common	1500015O10Rik,Abhd2,Abraxas2,Acadl,Acadm,Acadvl,Adam17,Adam8,Adar,Adh5,Adipoq,Adipor2,Adnp2,Adprhl2,Agap3,Agbl5,Aifm1,Ajuba,Alox5ap,Als2,Ano6,Anxa1,Anxa7,Ap3b1,Apaf1,Apbb1,Apod,Aqp1,Arhgap24,Arhgap35,Arnt,Atf2,Atf3,Atg13,Atg14,Atg4b,Atg5,Atg7,Atg9a,Atm,Atp13a2,Atp2a2,Atp7a,Atr,Atrx,Axl,B2m,B4galt1,Bad,Bag6,Bak1,Bax,Bccip,Bcl10,Bcl2l1,Bcl3,Bdnf,Becn1,Bid,Bloc1s6,Brca2,C1galt1c1,C5ar1,Capg,Casp1,Ca…
GO:0030162	regulation of proteolysis	1.94e-05	0.00158	106	3594	Common	Adam8,Adam9,Anks1,Antxr1,Apaf1,Arrb1,Atg7,Axin1,Bad,Bag6,Bak1,Bax,Bcl10,Bid,Bin1,Bok,Btrc,C2cd3,C3,Casp8,Casp8ap2,Casp9,Cav1,Cd55,Cd59a,Cfh,Cflar,Chfr,Clec16a,Cln3,Csnk1d,Csnk1e,Ctnnd1,Edem1,Edem2,Eif2ak3,Fbxo22,Fbxw7,Fmr1,Fnip1,Fuz,Gba,Gclc,Glg1,Gna12,Gsn,Herpud1,Ift88,Il33,Inpp5b,Ints1,Itch,Jak2,Ldlrad3,Lrig2,Lrrk2,Mapk14,Mapk3,Mical1,Mkl1,Mtm1,Myh9,N4bp1,Notch4,Nr1h3,Nr4a1,Ophn1,Pdcd6,Pias1,Pi…
GO:0007040	lysosome organization	2.11e-05	0.00167	23	3594	Common	Acp2,Atp6v0c,Becn1,Chmp5,Cln3,Cln5,Cln6,Cln8,Hexa,Hexb,Lamtor1,Lyst,Myo7a,Naglu,P2rx7,Ppt1,Rab34,Snapin,Spg11,Srpx,Tmem106b,Tpp1,Vps35
GO:0080171	lytic vacuole organization	2.11e-05	0.00167	23	3594	Common	Acp2,Atp6v0c,Becn1,Chmp5,Cln3,Cln5,Cln6,Cln8,Hexa,Hexb,Lamtor1,Lyst,Myo7a,Naglu,P2rx7,Ppt1,Rab34,Snapin,Spg11,Srpx,Tmem106b,Tpp1,Vps35
GO:0016236	macroautophagy	2.11e-05	0.00167	23	3594	Common	Atg12,Atg13,Atg16l1,Atg3,Atg4b,Atg5,Atg7,Atg9a,Becn1,Cln3,Ctsd,Gba,Irgm1,Lamp2,Mcoln1,Pik3c3,Psen1,Rab7,Rb1cc1,Retreg1,Snapin,Ulk1,Wipi2
GO:0006886	intracellular protein transport	2.18e-05	0.00171	95	3594	Common	Agap3,Ahcyl1,Ap1b1,Ap1g1,Ap1m1,Ap2a1,Ap2m1,Ap3b1,Ap4e1,Ap4m1,Ap4s1,Arl6ip1,Bcr,Bid,Cd74,Cdk5,Cep57,Clip1,Cttn,Derl2,Erbin,Gsk3b,Hspa9,Ing1,Ipo11,Ipo5,Ipo7,Ipo9,Kpna2,Kpna4,Kpna6,Kpnb1,Lamp2,M6pr,Mlph,Mmp12,Myo7a,Napa,Nfkbia,Npm1,Nup155,Nup160,Nup214,Pan3,Pex13,Pex5,Pex7,Phip,Pik3r1,Pml,Poldip3,Ppp1r3c,Ppp3ca,Ppp3r1,Rab10,Rab13,Rab1a,Rab27a,Rab2a,Rab6a,Rab7,Ran,Reep2,Rffl,Rftn1,Rhbdd1,Rilpl1,Scarb…
GO:1901701	cellular response to oxygen-containing compound	2.23e-05	0.00174	182	3594	Common	Abca1,Acaca,Adcy3,Adcy6,Adh5,Adnp2,Adprhl2,Agap3,Akap8,Ankrd1,Apc,Arid5a,Atg7,Atp7a,Bcl2l1,Bcr,C2cd5,Capn10,Capn2,Casp9,Ccl2,Cd14,Cd180,Cd36,Cd86,Cdc73,Cdk4,Cebpb,Col16a1,Col1a2,Col3a1,Col4a1,Col5a2,Col6a1,Cpeb1,Cpeb4,Ctr9,Cxcl16,Cyp1b1,Dab2ip,Dennd4c,Dgat2,Dnmt1,Dnmt3a,Egfr,Ehmt2,Eif4e,Eif4ebp1,Eif4ebp2,Esr1,Ezh2,Fcgr2b,Foxo1,Ghr,Gnai2,Gsk3a,Gsk3b,Hdac2,Icam1,Id3,Igf1,Igf1r,Impact,Inpp5k,Insr,Ip…
GO:0001701	in utero embryonic development	2.26e-05	0.00175	186	3594	Common	Acvr1,Acvr1b,Acvrl1,Adam10,Adar,Add1,Adm,Alkbh1,Amd1,Ankrd11,Arnt,Atp1b1,Axin1,Bcl2l1,Birc6,Bmpr1a,Bnip2,Bptf,Brca2,Brd4,Btf3,Bysl,C2cd3,Capn2,Ccm2,Ccnk,Cdk11b,Chd7,Chd8,Cnot1,Cnot2,Cnot3,Col4a3bp,Cops3,Ctnnb1,Ctr9,Cul3,Cul4a,Cyr61,Dab2,Dad1,Edn1,Ednra,Egfr,Egln1,Eif2s2,Eif4e2,Emg1,Fbxw8,Fgfr2,Flcn,Foxp1,G2e3,Gab1,Gabpa,Gata2,Gata6,Gatad2a,Ggnbp2,Gja1,Gli3,Gpi1,Grb2,Grn,Hand2,Hectd1,Heg1,Hif1a,Hs…
GO:0018205	peptidyl-lysine modification	2.36e-05	0.00181	54	3594	Common	Arid4a,Ash1l,Atp7a,Baz2a,Brd4,Brpf1,Cbx4,Ctr9,Ehmt1,Ehmt2,Ep300,Eya1,Ezh2,Hdac2,Hdac6,Kat14,Kat2a,Kat2b,Kat6a,Kat6b,Kdm3a,Kmt2a,Kmt2b,Kmt2d,Kmt5b,Ldb1,Loxl3,Mecp2,Ncoa1,Ncoa6,Nsd2,P3h3,P3h4,Per1,Pias1,Pias2,Pias3,Pwp1,Rbbp5,Rtf1,Senp1,Senp2,Setd1a,Setd2,Setd7,Setdb1,Smarca4,Smyd2,Sumo3,Taf1,Tet2,Vipas39,Vps33b,Wdr82
GO:0036503	ERAD pathway	2.76e-05	0.0021	16	3594	Common	Ccdc47,Derl2,Dnajb9,Dnajc10,Edem1,Edem3,Fbxo6,Nrros,Rhbdd1,Sel1l,Syvn1,Tor1a,Ube2g2,Ube2j1,Vcp,Wfs1
GO:0051493	regulation of cytoskeleton organization	2.83e-05	0.00213	88	3594	Common	3110043O21Rik,Akap13,Apc,Arhgap35,Arpc2,Bbs4,Bcas3,Braf,Capza1,Capzb,Carmil1,Cdk5rap2,Cep120,Cfl1,Chordc1,Clasp1,Clasp2,Coro1a,Csf1r,Dixdc1,Dlg1,Dst,Dstn,Dyrk1a,Eml4,Eps8,Evl,Fgr,Flna,Gsn,Hdac2,Hdac6,Hdgfl3,Itgb1bp1,Itgb3,Jam3,Jmy,Lpar1,Lrp1,Map3k1,Mapk1,Mapk3,Mcph1,Mef2c,Mlst8,Mtor,Mtss1,Mycbp2,Myo1f,Nckap1,Nckap1l,Nin,Npm1,Nubp1,Pfn2,Pik3r1,Plek,Plekhh2,Plxna3,Ppfia1,Prkcd,Prkce,Ptger4,Ptk2b,Py…
GO:0010467	gene expression	2.84e-05	0.00213	159	3594	Common	Aars,Adam10,Adamts2,Adar,Aff1,Afg3l1,Aga,Ago2,Ahcyl1,Ahr,App,Bysl,C2cd3,Calcoco1,Casp1,Casp3,Casp7,Cavin1,Cdk13,Cdkal1,Celf2,Cln3,Col4a2,Cpe,Cpsf3,Ctsh,Ctsl,Ddx17,Ddx5,Dhcr24,Dhx33,Dicer1,Disp1,Dkc1,Drosha,Dync2h1,Eef2k,Eif2a,Eif2ak3,Eif2s1,Eif3a,Eif3b,Eif3c,Eif3d,Eif3e,Eif3f,Eif3h,Eif3i,Eif3k,Eif3l,Eif3m,Eif4ebp1,Eprs,Eri1,Ero1lb,Fas,Fcf1,Fkrp,Foxo3,Furin,Gars,Gli3,Gtf2h5,Gtpbp2,Gtpbp4,Hivep2,Hn…
GO:0006468	protein phosphorylation	2.94e-05	0.00218	163	3594	Common	Acvr1b,Acvr2a,Adam10,App,Atm,Atr,Braf,Brd4,Btk,Camk1,Camk2d,Camk2g,Cdk2,Cdk4,Cdk5,Cfl1,Chuk,Clk1,Clk2,Clk3,Clk4,Csf1r,Csk,Csnk1a1,Csnk1d,Csnk1e,Dab2,Dab2ip,Dapk1,Dclk1,Ddr1,Ddr2,Dguok,Dok1,Dyrk1a,Egfr,Eif2a,Eif2ak3,Eif2ak4,Eif2s1,Ern1,Fam20c,Fgr,Fyn,Gab1,Gsk3a,Gsk3b,Hacd3,Hipk2,Hipk3,Hsf1,Hus1,Ick,Igf1r,Ikbkb,Ilf3,Insr,Irak1,Irak3,Itgav,Jak1,Jak2,Kdr,Lats2,Limk2,Lrrk2,Lyn,Map2k1,Map2k3,Map2k5,Map…
GO:0010821	regulation of mitochondrion organization	3.16e-05	0.00231	32	3594	Common	Atp13a2,Bnip3,Bok,Cdc37,Clec16a,Cttn,Ddhd2,Dnm1l,Fam162a,Flcn,Gba,Gsk3a,Gsk3b,Hif1a,Htra2,Ier3,Igf1,Lmna,Mfn2,Mief1,Mief2,Mul1,Opa1,Parl,Prkaa1,Sh3glb1,Smurf1,Tigar,Tmem135,Trp53,Tspo,Vdac1
GO:0110053	regulation of actin filament organization	3.16e-05	0.00231	46	3594	Common	3110043O21Rik,Arhgap35,Arpc2,Bbs4,Braf,Capza1,Capzb,Carmil1,Cfl1,Coro1a,Dlg1,Dstn,Eps8,Evl,Flna,Gsn,Itgb1bp1,Jmy,Lpar1,Map3k1,Mlst8,Mtor,Mtss1,Nckap1,Nckap1l,Pfn2,Pik3r1,Plek,Plekhh2,Ppfia1,Prkcd,Prkce,Ptger4,Pycard,Rac1,Rictor,Sh3pxd2b,Shank3,Specc1l,Swap70,Synpo,Ttc8,Twf1,Twf2,Washc1,Wasl
GO:0010256	endomembrane system organization	3.4e-05	0.00246	70	3594	Common	Agfg1,Ank2,Ano6,Aqp1,Atp2a2,Bcas3,Cav1,Cav2,Ccdc47,Cdan1,Col4a3bp,Coro7,Creb1,Cxcr4,Dysf,Eif2ak3,Epb41l3,Fat4,Gak,Gorasp1,Hikeshi,Htt,Kifc3,Lamtor1,Lman1,Lyst,Mpp5,Myh10,Myof,Nbeal2,Ndrg1,Nectin2,P2rx7,Pacsin2,Pacsin3,Parp11,Pex5,Pten,Rab5b,Rab5c,Rfx2,Rtn3,Sec23ip,Serpine2,Shtn1,Snx19,Sod1,Srgn,Stx6,Syne2,Syt11,Tbc1d20,Tbpl1,Tjap1,Tmed10,Tmem127,Tmem43,Tmf1,Tor1a,Tor1aip1,Trip11,Uso1,Usp8,Vps18,V…
GO:0007264	small GTPase mediated signal transduction	3.56e-05	0.00254	40	3594	Common	Aif1,Arhgap31,Arhgef9,Baiap2,Cdc42,Cdc42ep1,Dbnl,Dnaja3,Dok3,Eps8,Gna12,Gna13,Grb2,Hacd3,Itsn1,Kalrn,Ksr1,Myo9b,Nf1,Nisch,Nras,Pecam1,Phactr4,Rac1,Ralgapa2,Ralgapb,Rap1a,Rap1b,Rap2b,Rap2c,Rhoa,Rhoj,Rhou,Rras2,Sos1,Sos2,Tiam1,Ulk1,Vav3,Wasf2
GO:0071345	cellular response to cytokine stimulus	3.56e-05	0.00254	120	3594	Common	Adipor2,Bad,Bbs2,Bbs4,Btk,Capg,Ccl2,Cd300lf,Cd74,Cdc42,Cdk4,Cib1,Cnot9,Coro1a,Csf1,Csf1r,Csf2ra,Ctr9,Cx3cl1,Cx3cr1,Cxcr4,Dab2ip,Dapk1,Ddx41,Eprs,Etv3,Evl,Fabp4,Flnb,Gab1,Gbp2b,Gbp3,Gsk3a,Gsk3b,Gsn,H2-Ab1,Hsp90ab1,Hspa5,Ifi204,Ifit2,Ifitm3,Ifnar1,Ikbkb,Il11ra1,Il1r1,Il1rap,Il3ra,Il6ra,Il6st,Impdh2,Irak1,Irak3,Irak4,Irf1,Irgm1,Jagn1,Jak1,Jak2,Keap1,Kif16b,Kif5b,Klf6,Lrch1,Mapk1,Mapk14,Mcm2,Mrc1,Myo…
GO:0050790	regulation of catalytic activity	3.65e-05	0.00259	264	3594	Common	Abhd5,Acacb,Ace,Acvr2a,Adam8,Adar,Adcy3,Adcy4,Adcy7,Adipoq,Aida,Ajuba,Als2,Angptl4,Ankrd54,Antxr1,Apaf1,Arhgap1,Arhgap24,Arhgef5,Arrb1,Atp13a2,Atp7a,Axin1,Bad,Bak1,Bax,Bbs4,Bcas3,Bcl10,Bcl6,Becn1,Bicd1,Bid,Bin1,Bok,C1galt1c1,C1qtnf2,Cab39,Casp3,Casp8,Casp8ap2,Casp9,Cav1,Ccar2,Ccdc88a,Ccnyl1,Ccs,Cdc37,Cdc42,Cdk5,Cdkn1a,Cdkn1b,Cdkn2c,Cenpe,Cflar,Chn1,Chordc1,Cib1,Cln3,Cln8,Coro1c,Csf1r,Cspg4,Ctnnb1…
GO:0030029	actin filament-based process	3.83e-05	0.0027	111	3594	Common	Actn1,Actr2,Aif1,Ank2,Arhgap35,Arhgef5,Baiap2,Bcl6,Cap1,Capn10,Casp4,Cavin3,Cdc42,Cfl1,Cfl2,Cflar,Cln3,Coro1a,Coro1c,Coro7,Csrp1,Dbn1,Diaph1,Dlc1,Dstn,Elmo1,Enah,Eps8,Evl,Farp2,Fat1,Flii,Flnb,Flnc,Fmnl1,Fscn1,Gas7,Gja5,Gsn,Itgb1,Itgb5,Jmy,Lcp1,Lpin1,Marcks,Mef2a,Mical1,Mical2,Mkln1,Mob2,Msrb1,Mtss1,Myh10,Myl6,Myo1c,Myo5a,Myrip,Nck1,Nck2,Nckap1,Nckap1l,Nf1,Nisch,Nup155,Ophn1,Palld,Parva,Pdcd6ip,Pd…
GO:0010608	posttranscriptional regulation of gene expression	4.31e-05	0.00301	82	3594	Common	Aars,Ace,Aco1,Adar,Ago2,App,Brf1,Cav1,Cdc37,Cnot6l,Cpeb1,Cpeb2,Cyfip1,Dicer1,Dnajc1,Dnajc3,Drosha,Eif2ak1,Eif2ak3,Eif2ak4,Eif2s1,Eif4e,Eif4ebp1,Eif4ebp2,Eif4enif1,Eif4g2,Eif4g3,Eif6,Elavl1,Eprs,Fam129a,Fbxo4,Fech,Fmr1,Fxr1,Gapdh,Gcnt2,Gtpbp2,Hnrnpd,Ilf3,Impact,Ireb2,Lrpprc,Mapkapk2,Mettl14,Mettl16,Mettl3,Npm1,Nsun4,Pabpc4,Paip2,Per1,Per2,Pink1,Ppp1r15a,Ppp1r15b,Pum2,Qk,Rara,Rbm10,Rbm3,Rbm4,Rbm4b,…
GO:0008219	cell death	4.92e-05	0.00341	147	3594	Common	Adarb1,Aifm1,Anxa6,Apaf1,Arf6,Atg3,Atm,Atp7a,Bad,Bag3,Bag6,Bak1,Bax,Bcl10,Bcl2l1,Bcl2l2,Bid,Birc2,Birc3,Bnip3,Bok,Brca2,Capn10,Casp1,Casp2,Casp3,Casp4,Casp7,Casp8,Casp8ap2,Casp9,Cdk5,Cdkn1a,Cebpb,Cidea,Cul1,Cul3,Cyld,Cyp1b1,Cyr61,Dab2ip,Dap3,Dapk1,Dhx9,Dido1,Dnaja3,Dnm1l,Ei24,Eif2ak3,Ern1,Ero1l,Etv6,Fam162a,Fap,Fas,Fnip2,Gas1,Gatad2a,Gli3,Gpr65,Gpx1,Gsdmd,Gsdme,Gsk3a,Gsk3b,Hand2,Htra2,Htt,Ier3,Ig…
GO:0008213	protein alkylation	5.35e-05	0.00366	41	3594	Common	Arid4a,Ash1l,Baz2a,Btg1,Btg2,Carm1,Ctr9,Eed,Ehmt1,Ehmt2,Ezh2,Hdac2,Icmt,Kdm3a,Kmt2a,Kmt2b,Kmt2c,Kmt2d,Kmt5b,Lcmt1,Mecp2,Ncoa6,Nsd1,Nsd2,Prmt1,Prmt2,Prmt3,Prmt5,Prmt7,Pwp1,Rbbp5,Rtf1,Satb1,Setd1a,Setd2,Setd7,Setdb1,Smyd2,Suz12,Tet2,Wdr82
GO:0006479	protein methylation	5.35e-05	0.00366	41	3594	Common	Arid4a,Ash1l,Baz2a,Btg1,Btg2,Carm1,Ctr9,Eed,Ehmt1,Ehmt2,Ezh2,Hdac2,Icmt,Kdm3a,Kmt2a,Kmt2b,Kmt2c,Kmt2d,Kmt5b,Lcmt1,Mecp2,Ncoa6,Nsd1,Nsd2,Prmt1,Prmt2,Prmt3,Prmt5,Prmt7,Pwp1,Rbbp5,Rtf1,Satb1,Setd1a,Setd2,Setd7,Setdb1,Smyd2,Suz12,Tet2,Wdr82
GO:0032970	regulation of actin filament-based process	5.45e-05	0.0037	67	3594	Common	3110043O21Rik,Akap13,Ank2,Arhgap35,Arpc2,Bbs4,Bcas3,Braf,Capza1,Capzb,Carmil1,Cav1,Cfl1,Coro1a,Csf1r,Dixdc1,Dlg1,Dstn,Eps8,Evl,Fgr,Flna,Gsn,Hdac2,Itgb1bp1,Itgb3,Jam3,Jmy,Lpar1,Lrp1,Map3k1,Mef2c,Mlst8,Mtor,Mtss1,Myh9,Myo1f,Nckap1,Nckap1l,Pde4b,Pde4d,Pfn2,Pik3r1,Plek,Plekhh2,Ppfia1,Prkcd,Prkce,Ptger4,Ptk2b,Pycard,Rac1,Rhoa,Rictor,Sh3pxd2b,Shank3,Smad4,Specc1l,Swap70,Synpo,Taok2,Tgfb2,Ttc8,Twf1,Twf2…
GO:0043254	regulation of protein complex assembly	6.2e-05	0.00417	65	3594	Common	Ahr,Apc,Arhgef2,Arpc2,Asap1,Bbs4,Bid,Capza1,Capzb,Carmil1,Cd36,Coro1a,Ctnnb1,Dab2ip,Dlg1,Dnajc15,Dyrk1a,Eps8,Evl,Farp2,Fas,Gba,Gsn,Ikzf1,Impact,Irf8,Jmy,Lmo4,Map3k1,Mapk8,Mapk9,Mlst8,Msn,Mtor,Ncam1,Nckap1,Nckap1l,Nin,Pan3,Paxip1,Pfn2,Plek,Prkcd,Prkce,Psen2,Pycard,Rab3gap1,Rac1,Rictor,Rps3,Rrn3,Sar1a,Sec24b,Sirt2,Slain2,Src,Stmn1,Tlr4,Togaram1,Twf1,Twf2,Vdac2,Vps35,Washc1,Wasl
GO:0097581	lamellipodium organization	6.67e-05	0.00446	21	3594	Common	Abi1,Ajuba,Arhgef6,Capzb,Cyfip1,Fgd4,Mtss1l,Myo9b,Nck1,Nck2,Nckap1,Nup85,Plekho1,Ptpro,Pxn,Rac1,S1pr1,Sh2b1,Vcl,Wasf2,Wasf3
GO:0010629	negative regulation of gene expression	6.85e-05	0.00455	361	3594	Common	Acacb,Ace,Acvr1b,Acvrl1,Adar,Adipoq,Aebp2,Ago2,Ahr,Ajuba,Arid1a,Asxl2,Atf3,Atf7ip,Atoh8,Atrx,Auh,Axin1,Bach1,Baz2a,Bbs2,Bbs4,Bcl6,Bcor,Bhlhe40,Bmi1,Bmp4,Bmp6,Cav1,Cbx1,Cbx3,Cbx4,Cbx5,Cc2d1b,Ccnd3,Cd36,Cd59a,Cdc42,Cdc73,Cdk6,Cdkn1a,Cebpb,Cebpd,Chd8,Cic,Ciita,Cipc,Clock,Cnot6l,Cnot7,Cnpy2,Cops2,Cpeb1,Cpeb2,Crem,Cry2,Cryab,Ctbp2,Ctcf,Ctgf,Ctnnb1,Ctr9,Cul3,Cux1,Daxx,Dcp2,Ddx20,Dicer1,Dll4,Dmap1,Dnmt1…
GO:0007229	integrin-mediated signaling pathway	7.16e-05	0.00472	18	3594	Common	Arhgap35,Ctgf,Cul3,Fgr,Fut8,Gab2,Itgb2,Itgb5,Nrp1,Ptk2,Ptpn11,Pxn,Rhoa,Syk,Thy1,Tln1,Tyrobp,Zyx
GO:0060840	artery development	7.62e-05	0.00499	51	3594	Common	Acvrl1,Adamts6,Adamts9,Ap2b1,Arid2,Bmp4,Bmpr1a,Bmpr2,Chd7,Cntrl,Col3a1,Ctnnb1,Cxcr4,Dctn5,Dll4,Dnm2,Eng,Eya1,Fuz,Gja5,Hand2,Hectd1,Jag1,Kat6a,Lox,Lrp1,Ltbp1,Luzp1,Myh10,Myocd,Ndst1,Nf1,Notch3,Nprl3,Nrp1,Plxnd1,Prickle1,Prrx1,Rbpj,Sec24b,Smad6,Smad7,Smarca4,Snx17,Srf,Tab1,Tbx2,Tgfb2,Tgfbr1,Vegfa,Zmiz1
GO:0012501	programmed cell death	7.89e-05	0.00513	145	3594	Common	Adarb1,Aifm1,Anxa6,Apaf1,Arf6,Atg3,Atm,Atp7a,Bad,Bag3,Bag6,Bak1,Bax,Bcl10,Bcl2l1,Bcl2l2,Bid,Birc2,Birc3,Bnip3,Bok,Brca2,Capn10,Casp1,Casp2,Casp3,Casp4,Casp7,Casp8,Casp8ap2,Casp9,Cdk5,Cdkn1a,Cebpb,Cul1,Cul3,Cyld,Cyp1b1,Cyr61,Dab2ip,Dap3,Dapk1,Dhx9,Dido1,Dnaja3,Dnm1l,Ei24,Eif2ak3,Ern1,Ero1l,Etv6,Fam162a,Fap,Fas,Fnip2,Gas1,Gatad2a,Gli3,Gpr65,Gpx1,Gsdmd,Gsk3a,Gsk3b,Hand2,Htra2,Htt,Ier3,Igf1,Irf3,Itga…
GO:0035556	intracellular signal transduction	8.34e-05	0.00538	226	3594	Common	Adcy3,Adcy6,Adcy9,Adgrg6,Aif1,Aifm1,Akap13,Alms1,Ank2,Apaf1,Arhgap31,Arhgef9,Atm,Atp1b1,Atrx,Axl,Azi2,Bad,Bag6,Baiap2,Bak1,Bax,Bcl10,Bcl2l1,Bid,Bnip3,Brca2,Btk,Calcrl,Casp3,Cblb,Ccdc88a,Cdc42,Cdc42ep1,Cdkn1a,Cebpb,Chuk,Csf1r,Csk,Ctr9,Cyp1b1,Dab2,Dab2ip,Dapk1,Dbnl,Dchs1,Dmd,Dnaja3,Dok1,Dok3,Ei24,Eif2ak3,Eif4ebp2,Eps8,Ern1,Ero1l,Fat4,Flot1,Fnip2,Foxo3,Gab1,Gab2,Gna12,Gna13,Gnaq,Gpx1,Grb2,Gsk3b,Gucy…
GO:0034249	negative regulation of cellular amide metabolic process	8.81e-05	0.00565	32	3594	Common	Bin1,Cnot6l,Cpeb1,Cpeb2,Ctsa,Eif2ak3,Eif2ak4,Eif2s1,Eif4e,Eif4ebp1,Eif4ebp2,Eif4enif1,Eprs,Fmr1,Fxr1,Gapdh,Ilf3,Mettl14,Mettl16,Mettl3,Ormdl3,Paip2,Qk,Rara,Rc3h1,Rpl13a,Sorl1,Tia1,Zc3h12a,Zfp36,Zfp36l1,Zfp36l2
GO:2001233	regulation of apoptotic signaling pathway	8.91e-05	0.00567	105	3594	Common	Bad,Bax,Bcl10,Bid,Bmp4,Bok,Cd44,Cd74,Cdk11b,Creb3l1,Ctnna1,Ctnnb1,Cx3cl1,Cx3cr1,Dab2,Dapk1,Daxx,Eef1e1,Ei24,Erp29,Eya1,Fam162a,Fas,Fbxw7,Fgfr1,Flcn,G2e3,Gas1,Gpx1,Grina,Gsk3a,Gsk3b,Herpud1,Hgf,Hmgb2,Hnrnpk,Hspb1,Hsph1,Hyal2,Hyou1,Ier3,Igbp1,Igf1,Itm2c,Ivns1abp,Jak2,Lmna,Madd,Maged1,Map3k7,Mapk8ip1,Mcl1,Meis3,Mkl1,Mnt,Nf1,Nfatc4,Nrp1,Opa1,Park7,Parl,Pdcd7,Pdia3,Pea15a,Pgap2,Pink1,Pml,Ppp2r1a,Prkcd…
GO:0043331	response to dsRNA	9.23e-05	0.00584	23	3594	Common	Adar,Ago2,Ddx1,Ddx21,Ddx58,Dhx36,Dicer1,Drosha,Irak3,Irf3,Kcnj8,Mapk1,Mapk3,Nfkb1,Nfkbia,P2rx7,Peli1,Rbm3,Rftn2,Ripk2,Stat1,Tlr3,Zc3hav1
GO:0080134	regulation of response to stress	9.32e-05	0.00586	269	3594	Common	Abr,Adam8,Adar,Adipoq,Aida,Anxa1,Anxa2,Aoah,Apbb1,Arrb2,Ash1l,Atp2b4,Axin1,Bad,Bap1,Bcl6,Bcr,Bid,Bok,Braf,C3,Cadm1,Casp1,Ccr1,Cd14,Cd276,Cd36,Cd44,Cd47,Cd55,Cd59a,Cd74,Cd86,Cfh,Chordc1,Clock,Commd1,Creb3l1,Ctnnb1,Cuedc2,Cul4a,Dab2,Dab2ip,Dact1,Dek,Dhx58,Dhx9,Dicer1,Dnajc3,Drosha,Dusp22,Dvl2,Dyrk1a,Edem1,Edem2,Eef1e1,Eif2ak3,Eif2ak4,Erbin,Ern1,Erp29,Esr1,Ets1,F2r,Fabp4,Fbln5,Fbxo18,Fbxo4,Fbxw7,Fcg…
GO:0051338	regulation of transferase activity	9.39e-05	0.00586	147	3594	Common	Ace,Adam8,Adar,Adipoq,Aida,Ajuba,Ankrd54,Axin1,Bad,C1galt1c1,C1qtnf2,Cab39,Casp3,Cav1,Ccdc88a,Ccnyl1,Cdc37,Cdc42,Cdk5,Cdkn1a,Cdkn1b,Cdkn2c,Cenpe,Chordc1,Cib1,Cln8,Csf1r,Cspg4,Ctnnb1,Dab2,Dab2ip,Dkc1,Dlg1,Dusp16,Dvl2,Ern1,Errfi1,Fabp4,Fbxo7,Fgr,Gab1,Gadd45a,Gadd45g,Ggnbp2,Gprc5b,Gsk3a,Hgf,Hipk3,Hmgn1,Hnrnpd,Hspb1,Hsph1,Inpp5k,Iqgap1,Irak1,Irak3,Irs1,Itgb3,Jak2,Kat2b,Lamtor2,Lamtor3,Ldb1,Lmo4,Lpar1…
GO:0006897	endocytosis	9.62e-05	0.00595	84	3594	Common	Abca1,Aif1,Amph,Anxa1,Ap2b1,App,Axl,Becn1,C3,Canx,Cap1,Cav1,Cav2,Cd14,Cd36,Cd47,Cd81,Cd9,Cdc42,Clcn3,Cln3,Coro1c,Dab2,Dennd1a,Dnajc6,Dock2,Eif2ak1,Elmo1,Ezr,Fcgr1,Fcgr2b,Gak,Gpr107,Gsn,Hck,Hip1,Hspg2,Htr1b,Ifitm3,Inpp5f,Irf8,Itgam,Itgav,Itgb1,Itgb2,Jmjd6,Ldlrad3,Lmbrd1,Lrp1,Lrp6,Mapk1,Mapk3,Mapkapk2,Mapkapk3,Mertk,Mesd,Mfge8,Myh9,Myo1g,Myo6,Myo7a,Necap1,Npc1,Ophn1,P2rx7,Pear1,Picalm,Pla2r1,Pld2,P…
GO:0033365	protein localization to organelle	9.66e-05	0.00595	90	3594	Common	2410089E03Rik,Agap3,Ahi1,Ank2,Ap3b1,Arf6,Atg9a,Atrx,Bag1,Banp,Bax,Bbs2,Bbs4,Bicd2,Bid,Brca2,C2cd3,Carm1,Cc2d2a,Cdk5,Cep57,Cep63,Ciz1,Daxx,Dnm1l,Dync2h1,Ezh2,Htt,Ift122,Ift20,Ing1,Ipo11,Ipo5,Ipo7,Ipo9,Irs1,Kpna2,Kpna4,Kpna6,Kpnb1,Lamp2,Lmna,Mapre1,Mcph1,Mmp12,Nfkbia,Nipbl,Nrp1,Nup155,Nup214,Osbpl8,Pacs1,Pcm1,Pes1,Pex13,Pex5,Pex7,Phip,Pik3r1,Plrg1,Pml,Ppp3ca,Ppp3r1,Pygo1,Rab11fip3,Rab29,Ran,Rpl11,S…
GO:0009966	regulation of signal transduction	0.0001	0.00614	560	3594	Common	3110043O21Rik,Acvr1,Acvr1b,Acvr2a,Acvrl1,Adam17,Adam8,Adar,Adgra2,Adgrg1,Adipoq,Ago1,Aida,Ajuba,Akap13,Akt3,Ankrd26,Ankrd54,Anks1,Apc,Arap3,Arhgap24,Arhgap35,Arhgap42,Arhgef2,Arrb1,Arrb2,Arrdc3,Ash1l,Aspn,Atf3,Atm,Atp6ap1,Atp6ap2,Atxn1,Atxn7,Axin1,Axl,Bad,Bax,Bcl10,Bcl6,Bicd1,Bid,Bmp4,Bmp6,Bmper,Bnip2,Bok,Braf,Btrc,C1qtnf1,C1qtnf2,C2cd3,Capzb,Carm1,Casp1,Cat,Cav1,Cavin3,Cblb,Cd300lf,Cd36,Cd44,Cd5…
GO:1903146	regulation of autophagy of mitochondrion	0.000103	0.00624	14	3594	Common	Cdc37,Clec16a,Cttn,Gba,Hif1a,Htra2,Mfn2,Mul1,Parl,Smurf1,Tigar,Trp53,Tspo,Vdac1
GO:0031331	positive regulation of cellular catabolic process	0.000108	0.00649	65	3594	Common	Abhd5,Adam8,Adam9,Ago2,Atg7,Axin1,Cdc37,Chfr,Clec16a,Cnot6l,Cnot7,Csnk1d,Csnk1e,Edem1,Edem2,Eif2ak4,Fbxl5,Fbxo22,Fbxw7,Fmr1,Gba,Gclc,Hif1a,Hmgb1,Hmox1,Il33,Irgm1,Lrrk2,Map3k7,Mettl14,Mettl16,Mettl3,Mfn2,Mlxipl,Mul1,Nod1,Pabpc1,Pias1,Prkaa1,Psen1,Psen2,Ptk2,Ptk2b,Qk,Rab12,Rc3h1,Rgma,Ripk2,Sh3glb1,Sirt1,Sirt2,Smurf1,Sumo3,Tbk1,Tlr2,Tnfaip3,Tnfrsf1b,Trib1,Trib2,Tsc2,Xbp1,Zc3h12a,Zfp36,Zfp36l1,Zfp36l2
GO:0009987	cellular process	0.000112	0.00675	2609	3594	Common	1500015O10Rik,2410089E03Rik,2700049A03Rik,3110043O21Rik,Aars,Aasdh,Aatf,Abca1,Abca5,Abcb1a,Abcb7,Abcd1,Abhd12,Abhd13,Abhd16a,Abhd17b,Abhd4,Abi1,Abi3bp,Ablim1,Abraxas2,Abtb2,Acaa1a,Acaca,Acacb,Acadl,Acadm,Acadvl,Acan,Aco1,Acot7,Acot9,Acox1,Acox3,Acp2,Acsl4,Acss1,Acss2,Actl6a,Actn1,Actr10,Actr2,Acvr1,Acvr1b,Acvr2a,Acvrl1,Adam10,Adam15,Adam17,Adam8,Adam9,Adamts2,Adamts9,Adamtsl4,Adar,Adarb1,Adcy3,Ad…
GO:0051348	negative regulation of transferase activity	0.000115	0.00686	55	3594	Common	Adar,Adipoq,Aida,Ajuba,Casp3,Cav1,Cdkn1a,Cdkn1b,Cdkn2c,Chordc1,Cln8,Dab2ip,Dusp16,Errfi1,Fabp4,Fbxo7,Gadd45a,Gadd45g,Ggnbp2,Hipk3,Hspb1,Inpp5k,Irak3,Kat2b,Lyn,Mapk7,Nf1,Nf2,Pik3ip1,Pkib,Pkig,Prkar1a,Prkca,Prkrip1,Psen1,Psen2,Ptpn2,Ptpn6,Ptprc,Ptprj,Rgs2,Setd7,Sh3bp5,Shb,Smyd3,Sorl1,Spred1,Spred2,Spred3,Spry2,Tnfaip3,Tsc2,Ubash3b,Washc1,Zfp36
GO:0035239	tube morphogenesis	0.00012	0.00713	251	3594	Common	Acvr1,Acvrl1,Adam8,Adamts9,Adgra2,Adipor2,Adm,Ahr,Angpt2,Anxa2,Apaf1,Arhgap35,Arid1a,Arid2,Arl13b,B4galt1,Bbs4,Bcas3,Bcl10,Becn1,Bmp4,Bmpr1a,Bmpr2,Btrc,C2cd3,Casp8,Cav1,Cc2d2a,Ccl2,Ccm2,Cd44,Cdh2,Cfl1,Chd7,Clec14a,Clic4,Col3a1,Csf1,Ctgf,Ctnnb1,Ctsh,Cul7,Cx3cl1,Cxcl12,Cxcr4,Cyp1b1,Cyr61,Dab2ip,Dact1,Dag1,Dchs1,Ddr1,Dicer1,Dlc1,Dlg1,Dlg5,Dll4,Dvl2,Edn1,Efnb2,Egfr,Eng,Enpep,Epas1,Epha2,Ephb3,Ephb4,E…
GO:0010556	regulation of macromolecule biosynthetic process	0.000122	0.00717	726	3594	Common	Aamdc,Aars,Aatf,Ablim1,Aco1,Acvr1,Acvr2a,Acvrl1,Adam8,Adipoq,Aebp1,Aebp2,Aff1,Ago1,Ahctf1,Ahi1,Ahr,Ajuba,Akirin2,Ankrd1,Apbb1,Apbb2,App,Arid1a,Arid5b,Arnt,Arntl2,Ash1l,Asxl2,Atf3,Atf6,Atf7ip,Atg7,Atm,Atmin,Atoh8,Atr,Atrx,Atxn1,Atxn7,Axin1,Bach1,Bag1,Banp,Baz2a,Bcl10,Bcl3,Bcl6,Bcor,Bhlhe40,Bmi1,Bmp3,Bmp4,Bmp6,Bmper,Bmpr1a,Bmpr1b,Bmpr2,Brca2,Brwd1,Btrc,C1qtnf2,Carm1,Cat,Cav1,Cbx1,Cbx3,Cbx4,Cbx5,Cc2…
GO:0031589	cell-substrate adhesion	0.000124	0.00717	48	3594	Common	Adam8,Adamts9,Ajuba,Axl,Cdk5,Col5a3,Ctgf,Ctnnb1,Ddr1,Dlc1,Fermt2,Fn1,Fndc3b,Fzd4,Fzd7,Itga4,Itga6,Itgav,Itgb1,Jam3,Lims1,Mertk,Mkln1,Myo1g,Nid1,Nid2,Npnt,Parva,Pecam1,Ppard,Pxn,Rab1a,Rac1,Rhoa,Sirpa,Sorbs1,Sorbs3,Src,Srf,Tek,Tnfrsf12a,Tnn,Tnxb,Trpm7,Tyro3,Vamp3,Vwf,Zyx
GO:0006469	negative regulation of protein kinase activity	0.000124	0.00717	48	3594	Common	Adar,Adipoq,Aida,Casp3,Cav1,Cdkn1a,Cdkn1b,Cdkn2c,Chordc1,Dab2ip,Dusp16,Errfi1,Fabp4,Fbxo7,Gadd45a,Gadd45g,Ggnbp2,Hipk3,Hspb1,Irak3,Kat2b,Lyn,Mapk7,Nf1,Nf2,Pkib,Pkig,Prkar1a,Prkca,Prkrip1,Psen1,Psen2,Ptpn2,Ptpn6,Ptprc,Ptprj,Rgs2,Sh3bp5,Shb,Smyd3,Sorl1,Spred1,Spred2,Spred3,Spry2,Tnfaip3,Tsc2,Ubash3b
GO:0042221	response to chemical	0.000124	0.00717	670	3594	Common	Abca1,Abcb1a,Abcc4,Ablim1,Abr,Abtb2,Acaca,Acvr1,Acvr2a,Acvrl1,Adam17,Adam8,Adam9,Adar,Adcy3,Adcy6,Add1,Adgrl3,Adh1,Adh5,Adipoq,Adipor2,Adnp2,Adprhl2,Agap3,Ago2,Ahr,Akap8,Akirin2,Alcam,Aldh1a1,Ank3,Ankrd1,Ano6,Anxa1,Anxa2,Anxa5,Apc,Apod,App,Arhgap35,Arhgef5,Arid5a,Arl6ip5,Arnt,Atf3,Atg5,Atg7,Atp13a2,Atp1a1,Atp1a2,Atp7a,Atrx,B2m,B4gat1,Bad,Bak1,Bap1,Bax,Bbs2,Bbs4,Bcl2l1,Bcr,Bdnf,Blmh,Bmp4,Bmp6,Bmpr…
GO:0009059	macromolecule biosynthetic process	0.000126	0.00719	182	3594	Common	Aars,Abca1,Acadm,Acan,Aff1,Ahr,Atad5,Atg16l1,Atg5,Atp7a,Atrx,B4galt1,B4gat1,Brca2,C1galt1c1,Calcoco1,Cavin1,Cdkal1,Chst3,Col4a2,Cytl1,Ddx17,Ddx5,Dhx33,Dnaja3,Dnajc2,Dpagt1,E4f1,Eef2k,Eif2a,Eif2ak3,Eif2s1,Eif3a,Eif3b,Eif3c,Eif3d,Eif3e,Eif3f,Eif3h,Eif3i,Eif3k,Eif3l,Eif3m,Eif4ebp1,Eogt,Eprs,Ext1,Ext2,Fbxo18,Fkrp,Foxo3,Gadd45g,Galnt1,Galnt10,Galnt7,Gars,Ggta1,Gorasp1,Gtf2h5,Gtpbp2,Gys1,Helb,Hif1a,Hiv…
GO:0043043	peptide biosynthetic process	0.000126	0.00719	39	3594	Common	Aars,Aasdh,Cdkal1,Dhx33,Eef2k,Eif2a,Eif2ak3,Eif2s1,Eif3a,Eif3b,Eif3c,Eif3d,Eif3e,Eif3f,Eif3h,Eif3i,Eif3k,Eif3l,Eif3m,Eif4ebp1,Eprs,Gars,Gclc,Gclm,Gtpbp2,Iars,Lars,Mars,Mrpl51,Pcsk5,Rack1,Rars,Rbm3,Rpl24,Secisbp2,Sepsecs,Tars,Trnau1ap,Wars
GO:1903827	regulation of cellular protein localization	0.00013	0.00735	86	3594	Common	Abhd17b,Apc,Arf6,Bcas3,Camk1,Cdh2,Cdk5,Cdkn1a,Cib1,Clip3,Commd1,Csnk1e,Ctdspl2,Cyld,Dab2,Dclk1,Ddrgk1,Edem1,Edem2,Ei24,Eif2ak3,Fbxo4,Fyn,Gsk3b,Hectd1,Hsph1,Hyal2,Ipo5,Itgam,Itgb1bp1,Kalrn,Lmna,Lrig2,Lrp4,Lrrk2,Lypla1,Lzts2,Mapk14,Mdfic,Med1,Mesd,Myo1c,Nf2,Npm1,Oaz2,Pik3r1,Pkdcc,Pkig,Ppm1a,Prkaa1,Prkci,Prnp,Ptpn11,Rab34,Ralgapa2,Ralgapb,Rer1,Rhoq,Rnf168,Rufy3,Sh3glb1,Shank3,Snx3,Sorbs1,Sqstm1,Stom…
GO:1905037	autophagosome organization	0.000131	0.00736	17	3594	Common	Atg12,Atg13,Atg16l1,Atg3,Atg4b,Atg5,Atg7,Atg9a,Becn1,Ctsd,Gba,Irgm1,Pik3c3,Psen1,Rb1cc1,Ulk1,Wipi2
GO:0030032	lamellipodium assembly	0.000131	0.00736	17	3594	Common	Ajuba,Arhgef6,Capzb,Cyfip1,Fgd4,Nck1,Nck2,Nckap1,Nup85,Ptpro,Pxn,Rac1,S1pr1,Sh2b1,Vcl,Wasf2,Wasf3
GO:2001020	regulation of response to DNA damage stimulus	0.000133	0.00736	37	3594	Common	Apbb1,Bid,Cd44,Cd74,Cul4a,Dek,Dyrk1a,Eef1e1,Fbxo18,Fbxo4,Fmr1,Helb,Hmgb1,Hnrnpk,Ier3,Mif,Nek1,Nsd2,Parp1,Paxip1,Pcbp4,Pgap2,Pnp,Rif1,Rnaseh2b,Rpl26,Senp2,Sirt1,Skil,Spred1,Spred2,Steap3,Terf2ip,Trp53bp1,Usp47,Xrcc1,Xrcc4
GO:0033036	macromolecule localization	0.000133	0.00736	327	3594	Common	2410089E03Rik,Abca1,Abca5,Abcb1a,Agap3,Ahcyl1,Ahi1,Ajuba,Akap10,Als2,Ank2,Ank3,Anxa1,Ap1b1,Ap1g1,Ap1m1,Ap2a1,Ap2m1,Ap3b1,Ap4e1,Ap4m1,Ap4s1,Arf1,Arf5,Arf6,Arl6ip1,Armcx3,Arrdc4,Atg9a,Atp8b1,Atrx,Bag1,Banp,Bax,Bbs2,Bbs4,Bbs7,Bcl6,Bcr,Bicd2,Bid,Bloc1s6,Brca2,C2cd3,C2cd5,Cacna1c,Cadm3,Carm1,Casc3,Cav1,Cc2d2a,Cd36,Cd74,Cdc42,Cdh2,Cdk5,Cenpe,Cep290,Cep57,Cep63,Cidea,Ciz1,Clip1,Cln3,Col4a3bp,Coro1c,Crot…
GO:0048585	negative regulation of response to stimulus	0.000134	0.00736	348	3594	Common	Abr,Adar,Adgra2,Adipoq,Aida,Ankrd26,Anxa2,Aoah,Apc,Arap3,Arhgap24,Arhgap35,Arhgap42,Arl6ip5,Arrb1,Arrb2,Arrdc3,Ash1l,Aspn,Atf3,Atm,Atp2b4,Atxn1,Atxn7,Axin1,Bbs2,Bbs4,Bcl6,Bcr,Bicd1,Bid,Bmp4,Bmper,Bok,Cav1,Cavin3,Cblb,Ccr1,Cd276,Cd44,Cd59a,Cd74,Cdk11b,Chrd,Chrdl1,Cib1,Cidea,Clock,Cnksr3,Commd1,Creb3l1,Crebrf,Crtc3,Ctdspl2,Ctnna1,Ctnnb1,Cuedc2,Cx3cl1,Cx3cr1,Dab2,Dab2ip,Dact1,Dapk1,Dhrs3,Dhx58,Dkk2,…
GO:0061136	regulation of proteasomal protein catabolic process	0.000138	0.00755	35	3594	Common	Atg7,Axin1,Bag6,Btrc,Chfr,Clec16a,Csnk1d,Csnk1e,Edem1,Edem2,Fbxo22,Fbxw7,Fmr1,Gba,Gclc,Gna12,Herpud1,Il33,Lrrk2,Mtm1,N4bp1,Ophn1,Pias1,Psen1,Psen2,Rpl11,Sco1,Senp1,Sirt2,Tmf1,Trib1,Trib2,Ube2k,Usp19,Xbp1
GO:1902903	regulation of supramolecular fiber organization	0.00014	0.00763	61	3594	Common	3110043O21Rik,Akap13,Apc,Arhgap35,Arpc2,Bbs4,Braf,Capza1,Capzb,Carmil1,Cfl1,Clasp1,Clasp2,Coro1a,Dlg1,Dstn,Dyrk1a,Eml4,Eps8,Evl,Flna,Gsn,Hdac2,Hdac6,Hdgfl3,Itgb1bp1,Jmy,Lpar1,Map3k1,Mef2c,Mlst8,Mtor,Mtss1,Nckap1,Nckap1l,Nin,Pfn2,Pik3r1,Plek,Plekhh2,Ppfia1,Prkcd,Prkce,Ptger4,Pycard,Rac1,Rictor,Sh3pxd2b,Shank3,Slain2,Smad4,Specc1l,Stmn1,Swap70,Synpo,Togaram1,Ttc8,Twf1,Twf2,Washc1,Wasl
GO:0008104	protein localization	0.000141	0.00764	288	3594	Common	2410089E03Rik,Agap3,Ahcyl1,Ahi1,Ajuba,Akap10,Als2,Ank2,Ank3,Ap1b1,Ap1g1,Ap1m1,Ap2a1,Ap2m1,Ap3b1,Ap4e1,Ap4m1,Ap4s1,Arf1,Arf5,Arf6,Arl6ip1,Armcx3,Arrdc4,Atg9a,Atrx,Bag1,Banp,Bax,Bbs2,Bbs4,Bbs7,Bcl6,Bcr,Bicd2,Bid,Bloc1s6,Brca2,C2cd3,C2cd5,Cacna1c,Cadm3,Carm1,Cav1,Cc2d2a,Cd36,Cd74,Cdc42,Cdh2,Cdk5,Cenpe,Cep290,Cep57,Cep63,Ciz1,Clip1,Cln3,Coro1c,Csnk1e,Ctnna1,Ctnnb1,Cttn,Cyb5r4,Daxx,Dbn1,Dchs1,Dennd4c,…
GO:0030036	actin cytoskeleton organization	0.000142	0.00766	96	3594	Common	Actn1,Actr2,Aif1,Arhgap35,Arhgef5,Baiap2,Bcl6,Cap1,Capn10,Casp4,Cavin3,Cdc42,Cfl1,Cfl2,Cflar,Cln3,Coro1a,Coro1c,Coro7,Csrp1,Dbn1,Diaph1,Dlc1,Dstn,Enah,Eps8,Evl,Farp2,Fat1,Flii,Flnb,Fscn1,Gas7,Gsn,Itgb1,Itgb5,Jmy,Lcp1,Lpin1,Marcks,Mef2a,Mical1,Mical2,Mkln1,Mob2,Msrb1,Mtss1,Myh10,Nck1,Nck2,Nckap1,Nckap1l,Nf1,Nisch,Ophn1,Palld,Pdcd6ip,Pdgfa,Pdgfb,Pdlim3,Pfdn1,Phactr1,Phactr4,Ppp1r9b,Prkar1a,Prkci,Ra…
GO:0045444	fat cell differentiation	0.000145	0.00778	51	3594	Common	Adgrf5,Adipoq,Aldh6a1,Alms1,Ap1s2,Arid5b,Arl4a,Bnip3,Bscl2,Cebpb,Cebpd,Ctbp2,Ebf2,Eif2ak3,Ep300,Ero1l,Fabp4,Fam120b,Fbxo9,Gdf10,Gpx1,Gsk3b,Itga6,Klf4,Lama4,Lrrc8c,Med1,Metrnl,Ncor2,Nipbl,Noc3l,Nr4a1,Nr4a2,Nudt7,Per2,Pias1,Plcb1,Pparg,Prdm16,Psmb8,Ptgs2,Rarres2,Rgs2,Runx1t1,Selenbp1,Senp2,Sh2b2,Sirt1,Slc2a4,Tbl1xr1,Zfp516
GO:0030334	regulation of cell migration	0.000153	0.00812	153	3594	Common	Abhd2,Abr,Adam8,Adamts9,Adgra2,Adgrg1,Adipoq,Ajuba,Aldoa,Amotl1,Ano6,Anxa1,Apc,Aqp1,Arap3,Arhgap5,Arhgef2,Atp8a1,Bcas3,Bcr,Bmp4,Braf,C3ar1,C5ar1,Carmil1,Cbll1,Ccl2,Cd74,Cd99l2,Cdk5,Cib1,Col3a1,Coro1a,Coro1c,Csf1r,Ctsh,Cxcl12,Cxcr4,Cyp1b1,Cyr61,Dab2,Dab2ip,Ddr2,Dll4,Dock8,Ecm1,Efna1,Elp3,Elp5,Epha2,F2r,Fbxw7,Fgr,Gab1,Gab2,Gna12,Gna13,Hif1a,Igsf10,Ikbkap,Il1r1,Itgav,Itgb1bp1,Itgb3,Jun,Kdr,Kitl,Klf4…
GO:0043542	endothelial cell migration	0.000158	0.00838	22	3594	Common	Adgra2,Clec14a,Cyp1b1,Gpx1,Hmgb1,Itgav,Itgb1,Kdr,Lemd3,Mmrn2,Nrp1,Paxip1,Pecam1,Plekhg5,Plxnd1,Pten,Ptk2,Rab13,Scarb1,Srf,Tgfbr1,Vegfa
GO:1901566	organonitrogen compound biosynthetic process	0.000163	0.00855	186	3594	Common	Aars,Aasdh,Abca1,Acacb,Acan,Acss1,Acss2,Adcy3,Adcy4,Adcy5,Adcy6,Adcy7,Adcy9,Adk,Adss,Agk,Aldh18a1,Amd1,Ampd2,Atg16l1,Atg5,Atp7a,B3gnt5,B4galt1,B4gat1,C1galt1c1,Cdkal1,Cept1,Cers2,Cers4,Cers5,Chpt1,Chst3,Coasy,Cpox,Csad,Cytl1,Degs1,Dhx33,Dpagt1,Dtymk,Eef2k,Eif2a,Eif2ak3,Eif2s1,Eif3a,Eif3b,Eif3c,Eif3d,Eif3e,Eif3f,Eif3h,Eif3i,Eif3k,Eif3l,Eif3m,Eif4ebp1,Elovl1,Eogt,Eprs,Ext1,Ext2,Fech,Fkrp,G6pdx,Galk…
GO:0034504	protein localization to nucleus	0.000164	0.00859	42	3594	Common	Agap3,Banp,Cdk5,Cep57,Ciz1,Htt,Ing1,Ipo11,Ipo5,Ipo7,Ipo9,Irs1,Kpna2,Kpna4,Kpna6,Kpnb1,Lmna,Mmp12,Nfkbia,Nup155,Nup214,Osbpl8,Phip,Pik3r1,Plrg1,Pml,Ppp3ca,Ppp3r1,Pygo1,Ran,Rpl11,Smo,Sox9,Sumo3,Syne2,Tor1a,Tor1aip1,Trp53,Tsc2,Txn1,Txnip,Xpo1
GO:0044092	negative regulation of molecular function	0.000167	0.0087	139	3594	Common	3110043O21Rik,Acacb,Ace,Adar,Adipoq,Aida,Ajuba,Angptl4,Ank3,Arrb1,Atp7a,Bbs4,Bcas3,Bicd1,Bin1,Carm1,Casp3,Cat,Cav1,Ccar2,Cdkn1a,Cdkn1b,Cdkn2c,Cebpg,Cflar,Chordc1,Cln3,Cln8,Cyp1b1,Dab2ip,Dusp16,Eif2ak4,Errfi1,Fabp4,Fbxo18,Fbxo7,Fbxw7,Fnip1,Gadd45a,Gadd45g,Ggnbp2,Gla,Glis2,Hand2,Hdac3,Hipk3,Hspb1,Id1,Id2,Igf1r,Inpp5k,Ints1,Irak2,Irak3,Itch,Jak2,Kat2b,Kat6a,Kdm5a,Klf4,Lrch1,Lyn,Mapk3,Mapk7,Med13,Mic…
GO:0031647	regulation of protein stability	0.000181	0.00938	47	3594	Common	Ank2,Atp1b1,Bag3,Bag6,Cdc42,Chfr,Commd1,Creb1,Crebl2,Ctsa,Ctsh,Ep300,Fbxl3,Fbxo4,Fbxw7,Id1,Lamp1,Lamp2,Mul1,Mylip,Nckap1,Nf2,Npm1,Otud5,Park7,Pim1,Pink1,Plpp3,Prkdc,Pycard,Rnf149,Rtn4,Sirt1,Smo,Src,Stk4,Syvn1,Tada2a,Tada3,Telo2,Trim24,Ubr5,Usp19,Usp36,Vps35,Wfs1,Xbp1
GO:0071375	cellular response to peptide hormone stimulus	0.000186	0.00958	52	3594	Common	Adcy6,Apc,C2cd5,Capn10,Cdk4,Dennd4c,Eif4ebp1,Eif4ebp2,Foxo1,Ghr,Gsk3a,Gsk3b,Igf1,Igf1r,Insr,Irs1,Jak2,Lpin1,Myo5a,Ndel1,Nr4a1,Nr4a2,Pdk2,Pdk4,Phip,Pik3r1,Plcb1,Pparg,Prkci,Ptpn1,Ptpn2,Ptpra,Rab10,Rhoq,Rps6kb1,Sh2b2,Sik2,Slc2a4,Slc2a8,Soga1,Sorbs1,Srsf3,Stat3,Stat5a,Stat5b,Syap1,Tsc2,Vamp2,Wdtc1,Xbp1,Zfp106,Zfp36l1
GO:0043086	negative regulation of catalytic activity	0.000196	0.01	89	3594	Common	Acacb,Adar,Adipoq,Aida,Ajuba,Angptl4,Arrb1,Atp7a,Bbs4,Bcas3,Bicd1,Bin1,Casp3,Cav1,Ccar2,Cdkn1a,Cdkn1b,Cdkn2c,Cflar,Chordc1,Cln3,Cln8,Dab2ip,Dusp16,Errfi1,Fabp4,Fbxo7,Fnip1,Gadd45a,Gadd45g,Ggnbp2,Gla,Hipk3,Hspb1,Inpp5k,Ints1,Irak3,Kat2b,Kdm5a,Lrch1,Lyn,Mapk7,Mical1,Mkl1,Nf1,Nf2,Nos3,Nr4a1,Picalm,Pik3ip1,Pkib,Pkig,Prkar1a,Prkca,Prkrip1,Psen1,Psen2,Ptgs2,Ptpn2,Ptpn6,Ptprc,Ptprj,Pxk,Rcc2,Reck,Rgs2,Rr…
GO:0035295	tube development	0.000197	0.01	322	3594	Common	Acvr1,Acvrl1,Adam8,Adamts2,Adamts9,Adgra2,Adgrg1,Adipor2,Adm,Ahr,Ambra1,Angpt2,Anxa2,Apaf1,Arhgap35,Arid1a,Arid2,Arl13b,Atp7a,Atrx,Atxn1l,B4galt1,Bag6,Bbs4,Bcas3,Bcl10,Bdnf,Becn1,Bmi1,Bmp4,Bmpr1a,Bmpr2,Btrc,C2cd3,Casp8,Cav1,Cc2d2a,Ccl2,Ccm2,Cd44,Cdh2,Cfl1,Chd7,Cic,Clec14a,Clic4,Col3a1,Creb1,Csf1,Ctgf,Ctnnb1,Ctsh,Cul7,Cux1,Cx3cl1,Cxcl12,Cxcr4,Cyp1b1,Cyr61,Dab2ip,Dact1,Dag1,Dchs1,Ddr1,Dicer1,Dlc1,D…
GO:0001525	angiogenesis	0.000199	0.01	86	3594	Common	Acvr1,Acvrl1,Adam8,Adgra2,Adipor2,Ahr,Anxa2,B4galt1,Becn1,Bmp4,Casp8,Ccl2,Clec14a,Clic4,Ctgf,Ctnnb1,Cx3cl1,Cxcl12,Cxcr4,Cyp1b1,Cyr61,Dicer1,Dll4,Edn1,Eng,Enpep,Epas1,Epha2,Ephb3,Ephb4,Flna,Flt1,Flt4,Gna13,Gpx1,Hif1a,Itgb1,Jam3,Jmjd6,Jun,Kctd10,Kdr,Lemd3,Map3k7,Mapk14,Med1,Meis1,Mmrn2,Nos3,Notch4,Nrp1,Otulin,Parva,Pdgfa,Pdgfrb,Pecam1,Pik3cb,Pknox1,Plxnd1,Pnpla6,Ppp3r1,Prcp,Pten,Ptk2,Ptk2b,Ptprb,Ra…
GO:0030097	hemopoiesis	0.000207	0.0103	239	3594	Common	Abi1,Adam17,Adam8,Adar,Add1,Ahctf1,Ahr,Angpt2,Anxa1,Apc,Arid4a,Arl11,Atg5,Atm,Atp7a,Azi2,Bcl3,Bcl6,Bcr,Bmp4,Braf,Brca2,Btk,Casp8,Ccr1,Cd109,Cd1d1,Cd300lf,Cd74,Cdk6,Cebpg,Chd2,Chuk,Ciapin1,Cib1,Clec4d,Csf1,Csf1r,Ctc1,Ctnnb1,Cul4a,Cyld,Dcaf1,Dhrs7b,Dll4,Dnaja3,Dnajb9,Dnase2a,Dock10,Dock11,Dock2,Ebp,Egr1,Eif2ak1,Ep300,Epas1,Epha2,Ercc1,Exoc6,Fam20c,Farp2,Fas,Fech,Fgfr2,Flcn,Fli1,Fnip1,Foxp1,Fubp1,Fz…
GO:0065009	regulation of molecular function	0.000208	0.0103	389	3594	Common	3110043O21Rik,Abhd5,Acacb,Ace,Acvr2a,Adam8,Adar,Adcy3,Adcy4,Adcy7,Adipoq,Aida,Ajuba,Als2,Angptl4,Ank2,Ank3,Ankrd54,Antxr1,Anxa2,Apaf1,App,Arhgap1,Arhgap24,Arhgef5,Arid5b,Arrb1,Atp13a2,Atp1b1,Atp7a,Atr,Axin1,Bad,Bak1,Bax,Bbs4,Bcas3,Bcl10,Bcl6,Becn1,Bicd1,Bid,Bin1,Bok,Brd4,C1galt1c1,C1qtnf2,Cab39,Carm1,Casp3,Casp8,Casp8ap2,Casp9,Cat,Cav1,Ccar2,Ccdc88a,Ccnyl1,Ccs,Cd84,Cdc37,Cdc42,Cdk5,Cdkn1a,Cdkn1b,…
GO:0019882	antigen processing and presentation	0.000209	0.0103	26	3594	Common	Ap3b1,Atg5,B2m,Bag6,Cd1d1,Cd74,Fcgr1,Fcgr2b,H2-Aa,H2-Ab1,H2-D1,H2-DMa,H2-DMb1,H2-Eb1,Icam1,March1,March8,Psmb8,Psmb9,Psme1,Rftn1,Tap2,Tapbp,Traf6,Unc93b1,Washc1
GO:1901998	toxin transport	0.000209	0.0103	26	3594	Common	Antxr2,Arid1a,Atp6v0a1,Bnip3,Casp1,Cct2,Cct3,Cct4,Cct5,Cct7,Cct8,Cd274,Copb2,Copz1,Crtc2,Dnaja1,Hspa5,Mtmr12,Nrp1,Ptprg,Rab28,Scfd1,Tcp1,Trip4,Vamp4,Vps11
GO:1903829	positive regulation of cellular protein localization	0.00021	0.0103	50	3594	Common	Abhd17b,Apc,Arf6,Bcas3,Camk1,Cdk5,Cib1,Clip3,Commd1,Ctdspl2,Cyld,Ddrgk1,Edem1,Edem2,Eif2ak3,Fyn,Hyal2,Ipo5,Itgam,Itgb1bp1,Lrig2,Lrp4,Lrrk2,Mapk14,Med1,Mesd,Myo1c,Npm1,Oaz2,Ppm1a,Prkaa1,Prkci,Prnp,Rab34,Rer1,Rufy3,Sh3glb1,Sorbs1,Sqstm1,Stom,Syt11,Tek,Tgfb1,Tgfb2,Trim8,Tsg101,Uaca,Vamp2,Washc1,Zpr1
GO:0030099	myeloid cell differentiation	0.000211	0.0104	96	3594	Common	Abi1,Adam8,Adar,Add1,Arid4a,Bcl6,Bmp4,Casp8,Ccr1,Cd109,Cd300lf,Cebpg,Chuk,Cib1,Csf1,Csf1r,Ctnnb1,Dhrs7b,Dnase2a,Eif2ak1,Ep300,Epas1,Epha2,Exoc6,Fam20c,Farp2,Fech,Fli1,G6pdx,Gab2,Gpr183,Hcls1,Irf8,Itgam,Jak2,Jmjd6,Jun,Kdm1a,Kmt2e,L3mbtl3,Ldb1,Lrrk1,Ltbr,Lyn,Mapk14,Med1,Mef2c,Meis1,Mitf,Nbeal2,Ncor1,Nfe2l1,Nkap,Notch2,Ostm1,Pabpc4,Pip4k2a,Pknox1,Plcb1,Pml,Prdx3,Psen1,Ptpn11,Ptpn2,Ptpn6,Rbpj,Rcor1,R…
GO:0051495	positive regulation of cytoskeleton organization	0.000214	0.0104	34	3594	Common	Apc,Arpc2,Bcas3,Braf,Carmil1,Cep120,Cfl1,Dlg1,Dstn,Evl,Itgb1bp1,Jmy,Lpar1,Map3k1,Mlst8,Mtor,Mtss1,Nckap1,Nckap1l,Nin,Pfn2,Plek,Plxna3,Prkce,Pycard,Rac1,Rictor,Rock2,Sh3pxd2b,Swap70,Synpo,Togaram1,Washc1,Wasl
GO:2000145	regulation of cell motility	0.000221	0.0107	162	3594	Common	Abhd2,Abr,Adam8,Adamts9,Adgra2,Adgrg1,Adipoq,Ajuba,Aldoa,Amotl1,Ano6,Anxa1,Apc,Aqp1,Arap3,Arhgap5,Arhgef2,Atp8a1,Bbs2,Bbs4,Bcas3,Bcr,Bmp4,Braf,C3ar1,C5ar1,Carmil1,Cavin1,Cbll1,Ccl2,Cd74,Cd99l2,Cdk5,Cib1,Col3a1,Coro1a,Coro1c,Csf1r,Ctnna1,Ctsh,Cxcl12,Cxcr4,Cyp1b1,Cyr61,Dab2,Dab2ip,Ddr2,Dll4,Dock8,Ecm1,Efna1,Elp3,Elp5,Epha2,F2r,Fbxw7,Fgr,Gab1,Gab2,Gna12,Gna13,Hif1a,Igsf10,Ikbkap,Il1r1,Inpp5f,Itgav,I…
GO:1902905	positive regulation of supramolecular fiber organization	0.000224	0.0108	30	3594	Common	Apc,Arpc2,Braf,Carmil1,Cfl1,Dlg1,Dstn,Evl,Itgb1bp1,Jmy,Lpar1,Map3k1,Mlst8,Mtor,Mtss1,Nckap1,Nckap1l,Nin,Pfn2,Plek,Prkce,Pycard,Rac1,Rictor,Sh3pxd2b,Swap70,Synpo,Togaram1,Washc1,Wasl
GO:0009889	regulation of biosynthetic process	0.000238	0.0114	765	3594	Common	Aamdc,Aars,Aatf,Ablim1,Acadl,Acadm,Acadvl,Aco1,Acvr1,Acvr2a,Acvrl1,Adam8,Adgrf5,Adipoq,Aebp1,Aebp2,Aff1,Ago1,Ahctf1,Ahi1,Ahr,Ajuba,Akirin2,Ankrd1,Apbb1,Apbb2,App,Arid1a,Arid5b,Arnt,Arntl2,Ash1l,Asxl2,Atf3,Atf6,Atf7ip,Atg7,Atm,Atmin,Atoh8,Atp1a1,Atr,Atrx,Atxn1,Atxn7,Axin1,Bach1,Bag1,Banp,Baz2a,Bcl10,Bcl3,Bcl6,Bcor,Bhlhe40,Bmi1,Bmp3,Bmp4,Bmp6,Bmper,Bmpr1a,Bmpr1b,Bmpr2,Brca2,Brwd1,Btrc,C1qtnf2,Carm1…
GO:0019884	antigen processing and presentation of exogenous antigen	0.00024	0.0114	16	3594	Common	Ap3b1,B2m,Cd1d1,Cd74,Fcgr1,Fcgr2b,H2-Aa,H2-Ab1,H2-DMa,H2-DMb1,H2-Eb1,Psme1,Tap2,Tapbp,Traf6,Unc93b1
GO:0000045	autophagosome assembly	0.00024	0.0114	16	3594	Common	Atg12,Atg13,Atg16l1,Atg3,Atg4b,Atg5,Atg7,Atg9a,Becn1,Ctsd,Irgm1,Pik3c3,Psen1,Rb1cc1,Ulk1,Wipi2
GO:0007166	cell surface receptor signaling pathway	0.000249	0.0118	378	3594	Common	2700049A03Rik,Acvr1,Acvr1b,Acvr2a,Acvrl1,Adam10,Adam9,Adipor2,Ahi1,Angpt2,Anks1,Ano6,Anxa4,Apc,App,Arhgap35,Arid5b,Arl13b,Arl3,Atxn1,Axin1,Bad,Bag3,Bax,Bbs2,Bbs4,Bcar1,Bcl2l1,Bcl2l2,Bdnf,Bid,Bmp4,Bmp6,Bmpr1a,Bmpr1b,Bmpr2,Boc,Braf,C2cd5,Cacnb3,Caml,Casp2,Casp8,Casp8ap2,Cc2d2a,Cd14,Cd22,Cd300lf,Cd36,Cd44,Cd74,Cdc42,Cdh6,Cdk5,Cdk6,Cdkn1b,Celsr2,Chn1,Cib1,Clec4d,Cln3,Cnot9,Csf1,Csf1r,Cspg4,Csrnp1,Ctg…
GO:0006915	apoptotic process	0.000252	0.0118	129	3594	Common	Adarb1,Aifm1,Anxa6,Apaf1,Arf6,Atg3,Atm,Atp7a,Bad,Bag3,Bag6,Bak1,Bax,Bcl10,Bcl2l1,Bcl2l2,Bid,Bnip3,Bok,Brca2,Capn10,Casp2,Casp3,Casp7,Casp8,Casp8ap2,Casp9,Cdk5,Cdkn1a,Cebpb,Cul1,Cul3,Cyp1b1,Cyr61,Dab2ip,Dap3,Dapk1,Dido1,Dnaja3,Ei24,Eif2ak3,Ern1,Ero1l,Etv6,Fam162a,Fap,Fas,Fnip2,Gli3,Gpr65,Gpx1,Gsk3a,Gsk3b,Hand2,Htra2,Htt,Ier3,Igf1,Itgam,Itgav,Itm2b,Itpr1,Jak2,Jmy,Jtb,Kdelr1,Kitl,Kremen1,Madd,Map3k1…
GO:1905897	regulation of response to endoplasmic reticulum stress	0.000271	0.0127	21	3594	Common	Bok,Creb3l1,Dnajc3,Edem1,Edem2,Eif2ak3,Erp29,Fcgr2b,Grina,Herpud1,Hyou1,Opa1,Park7,Ppp1r15a,Ppp1r15b,Ptpn1,Ptpn2,Serinc3,Sirt1,Syvn1,Wfs1
GO:1902531	regulation of intracellular signal transduction	0.000278	0.0129	295	3594	Common	3110043O21Rik,Adam8,Adgrg1,Adipoq,Ago1,Aida,Ajuba,Akt3,Ankrd26,Ankrd54,Apc,Arap3,Arhgap24,Arhgap35,Arhgap42,Arhgef2,Arrb1,Arrb2,Arrdc3,Ash1l,Atf3,Atm,Atp6ap1,Axin1,Axl,Bad,Bax,Bcl6,Bid,Bmp4,Bnip2,Bok,Braf,Btrc,C1qtnf1,C1qtnf2,Capzb,Casp1,Cat,Cav1,Cavin3,Cd36,Cd44,Cd74,Cd84,Cdc42,Cdk5,Cdon,Chuk,Cib1,Cnksr3,Col3a1,Creb3l1,Crtc3,Csf1,Csf1r,Cspg4,Ctnnb1,Cyp1b1,Dab2,Dab2ip,Dact1,Dhx33,Dhx58,Dlg1,Dlg5,…
GO:0034641	cellular nitrogen compound metabolic process	0.000283	0.0131	417	3594	Common	Aars,Aasdh,Abhd4,Acaca,Acacb,Acadl,Acadm,Acot9,Acss1,Acss2,Adar,Adarb1,Adcy3,Adcy4,Adcy5,Adcy6,Adcy7,Adcy9,Adk,Adss,Aff1,Agk,Ago1,Ago2,Ago4,Ahcyl1,Ahr,Aldh9a1,Amd1,Ampd2,Apbb1,App,Atad5,Atm,Atp7a,Atr,Atrx,Auh,Axin1,Azin1,Bad,Banf1,Baz2a,Becn1,Bid,Bmi1,Brca2,Btd,Bysl,Calcoco1,Cavin1,Cdk13,Cdkal1,Cebpg,Celf2,Cep63,Cers2,Cers4,Cers5,Ces1d,Cnot6l,Cnot7,Coasy,Col4a2,Col4a3bp,Coq9,Cpe,Cpox,Cpsf3,Crot,C…
GO:0019219	regulation of nucleobase-containing compound metabolic process	0.000285	0.0132	731	3594	Common	Aamdc,Ablim1,Acvr1,Acvr2a,Acvrl1,Adam8,Adipoq,Aebp1,Aebp2,Aff1,Ago1,Ago2,Ahctf1,Ahcyl1,Ahi1,Ahnak,Ahr,Ajuba,Akirin2,Ankrd1,Apbb1,Apbb2,App,Arid1a,Arid5b,Arnt,Arntl2,Ash1l,Asxl2,Atad5,Atf3,Atf6,Atf7ip,Atm,Atmin,Atoh8,Atp7a,Atr,Atrx,Atxn1,Atxn7,Axin1,Bach1,Bag1,Banp,Baz2a,Bcl10,Bcl3,Bcl6,Bcor,Bhlhe40,Bmi1,Bmp3,Bmp4,Bmp6,Bmper,Bmpr1a,Bmpr1b,Bmpr2,Brca2,Brf1,Brwd1,Btrc,Carm1,Cat,Cav1,Cbx1,Cbx3,Cbx4,C…
GO:0031334	positive regulation of protein complex assembly	0.00029	0.0133	37	3594	Common	Ahr,Apc,Arpc2,Asap1,Bid,Carmil1,Cd36,Ctnnb1,Dlg1,Evl,Fas,Ikzf1,Irf8,Jmy,Map3k1,Mapk8,Mapk9,Mlst8,Msn,Mtor,Nckap1,Nckap1l,Nin,Pan3,Paxip1,Pfn2,Plek,Prkce,Pycard,Rac1,Rictor,Rps3,Src,Tlr4,Togaram1,Washc1,Wasl
GO:1901653	cellular response to peptide	0.000293	0.0134	54	3594	Common	Adcy6,Apc,C2cd5,Capn10,Cdk4,Dennd4c,Eif4ebp1,Eif4ebp2,Fcgr2b,Foxo1,Ghr,Gsk3a,Gsk3b,Igf1,Igf1r,Insr,Irs1,Jak2,Lpin1,Myo5a,Ndel1,Nr4a1,Nr4a2,Pdk2,Pdk4,Phip,Pik3r1,Plcb1,Pparg,Prkci,Ptpn1,Ptpn2,Ptpn22,Ptpra,Rab10,Rhoq,Rps6kb1,Sh2b2,Sik2,Slc2a4,Slc2a8,Soga1,Sorbs1,Srsf3,Stat3,Stat5a,Stat5b,Syap1,Tsc2,Vamp2,Wdtc1,Xbp1,Zfp106,Zfp36l1
GO:0043549	regulation of kinase activity	0.000303	0.0138	135	3594	Common	Ace,Adam8,Adar,Adipoq,Aida,Ajuba,Ankrd54,Axin1,Bad,C1qtnf2,Cab39,Casp3,Cav1,Ccdc88a,Ccnyl1,Cdc37,Cdc42,Cdk5,Cdkn1a,Cdkn1b,Cdkn2c,Cenpe,Chordc1,Cib1,Csf1r,Cspg4,Dab2,Dab2ip,Dlg1,Dusp16,Dvl2,Ern1,Errfi1,Fabp4,Fbxo7,Fgr,Gab1,Gadd45a,Gadd45g,Ggnbp2,Gprc5b,Hgf,Hipk3,Hspb1,Hsph1,Iqgap1,Irak1,Irak3,Irs1,Itgb3,Jak2,Kat2b,Lamtor2,Lamtor3,Ldb1,Lmo4,Lpar1,Lrp8,Lyn,Madd,Maged1,Map2k1,Map2k3,Map3k1,Map3k4,Map…
GO:0022610	biological adhesion	0.000309	0.0139	124	3594	Common	Aatf,Acvr1,Adam8,Adam9,Adamts9,Adgrl3,Ajuba,Axl,Bcam,Boc,Cadm1,Cadm3,Cd44,Cd99l2,Cdc42,Cdh2,Cdh5,Cdk5,Cdon,Celsr2,Cfdp1,Col5a3,Ctgf,Ctnna1,Ctnnb1,Ctnnd1,Cxcl12,Cyp1b1,Cyr61,Dchs1,Ddr1,Dlc1,Esam,F11r,Farp2,Fat1,Fat4,Fermt2,Flrt2,Fn1,Fndc3a,Fndc3b,Fzd4,Fzd7,Gbp2b,Gbp3,Gpnmb,Icam1,Itga1,Itga4,Itga5,Itga6,Itga7,Itgal,Itgam,Itgav,Itgb1,Itgb2,Itgb4,Jam3,Jup,Kirrel,Lims1,Mertk,Mkln1,Mpdz,Myh9,Myo1g,Ncam…
GO:0045859	regulation of protein kinase activity	0.000309	0.0139	124	3594	Common	Ace,Adam8,Adar,Adipoq,Aida,Ajuba,Ankrd54,Axin1,C1qtnf2,Cab39,Casp3,Cav1,Ccdc88a,Ccnyl1,Cdc37,Cdc42,Cdk5,Cdkn1a,Cdkn1b,Cdkn2c,Cenpe,Chordc1,Cib1,Csf1r,Cspg4,Dab2,Dab2ip,Dlg1,Dusp16,Dvl2,Ern1,Errfi1,Fabp4,Fbxo7,Fgr,Gab1,Gadd45a,Gadd45g,Ggnbp2,Gprc5b,Hgf,Hipk3,Hspb1,Hsph1,Iqgap1,Irak1,Irak3,Itgb3,Jak2,Kat2b,Lamtor2,Lamtor3,Lpar1,Lrp8,Lyn,Madd,Maged1,Map2k1,Map2k3,Map3k1,Map3k4,Map3k5,Mapk7,Mapkbp1,M…
GO:0034968	histone lysine methylation	0.000315	0.0141	23	3594	Common	Arid4a,Ash1l,Baz2a,Ctr9,Ehmt2,Ezh2,Hdac2,Kdm3a,Kmt2a,Kmt2b,Kmt2d,Kmt5b,Ncoa6,Nsd2,Pwp1,Rbbp5,Rtf1,Setd1a,Setd2,Setdb1,Smyd2,Tet2,Wdr82
GO:0032481	positive regulation of type I interferon production	0.000315	0.0141	23	3594	Common	Cd14,Chuk,Ddx58,Dhx33,Dhx58,Hmgb1,Hmgb2,Hspd1,Ifnar1,Irf1,Irf3,Irf7,Mavs,Mmp12,Plcg2,Ptpn22,Syk,Tbk1,Tlr2,Tlr3,Tlr4,Zc3hav1,Zfp64
GO:0043067	regulation of programmed cell death	0.000319	0.0141	304	3594	Common	Aamdc,Aars,Abraxas2,Adam17,Adam8,Adar,Ago4,Ahi1,Aifm1,Akr1b3,Aldh1a3,Alkbh1,Alms1,Ambra1,Angptl4,Ano6,Anxa1,Apaf1,Apbb2,Apc,Arhgap10,Arrb1,Atg5,Atg7,Atp7a,Axl,B4galt1,Bad,Bag1,Bag3,Bag6,Bak1,Bax,Bcl10,Bcl2l1,Bcl3,Bcl6,Bdnf,Becn1,Bid,Birc3,Birc6,Bmp4,Bnip3l,Bok,Braf,Capn10,Casp3,Casp8,Casp8ap2,Casp9,Cav1,Ccr5,Cd248,Cd44,Cd74,Cdc73,Cdk11b,Cdkn1a,Cdkn1b,Cebpb,Cfdp1,Cflar,Chd8,Ciapin1,Cib1,Cidea,Clec…
GO:0098657	import into cell	0.00032	0.0141	93	3594	Common	Abca1,Aif1,Amph,Anxa1,Ap2b1,App,Atp1a2,Axl,Becn1,C3,Canx,Cap1,Cav1,Cav2,Cd14,Cd36,Cd47,Cd81,Cd9,Cdc42,Clcn3,Cln3,Cln8,Coro1c,Dab2,Dennd1a,Dnajc6,Dock2,Eif2ak1,Elmo1,Ezr,Fcgr1,Fcgr2b,Gak,Gpr107,Gsn,Hck,Hfe,Hip1,Hspg2,Htr1b,Ifitm3,Inpp5f,Irf8,Itgam,Itgav,Itgb1,Itgb2,Jmjd6,Ldlrad3,Lmbrd1,Lrp1,Lrp6,Mapk1,Mapk3,Mapkapk2,Mapkapk3,Mertk,Mesd,Mfge8,Myh9,Myo1g,Myo6,Myo7a,Necap1,Npc1,Ophn1,P2rx7,Park7,Pear…
GO:2000112	regulation of cellular macromolecule biosynthetic process	0.00032	0.0141	701	3594	Common	Aamdc,Aars,Aatf,Ablim1,Aco1,Acvr1,Acvr2a,Acvrl1,Adam8,Adipoq,Aebp1,Aebp2,Aff1,Ago1,Ahctf1,Ahi1,Ahr,Ajuba,Akirin2,Ankrd1,Apbb1,Apbb2,App,Arid1a,Arid5b,Arnt,Arntl2,Ash1l,Asxl2,Atf3,Atf6,Atf7ip,Atm,Atmin,Atoh8,Atr,Atrx,Atxn1,Atxn7,Axin1,Bach1,Bag1,Banp,Baz2a,Bcl10,Bcl3,Bcl6,Bcor,Bhlhe40,Bmi1,Bmp3,Bmp4,Bmp6,Bmper,Bmpr1a,Bmpr1b,Bmpr2,Brca2,Brwd1,Btrc,C1qtnf2,Carm1,Cat,Cav1,Cbx1,Cbx3,Cbx4,Cbx5,Cc2d1b,C…
GO:0032869	cellular response to insulin stimulus	0.000328	0.0142	42	3594	Common	Apc,C2cd5,Capn10,Cdk4,Dennd4c,Eif4ebp1,Eif4ebp2,Foxo1,Gsk3a,Gsk3b,Igf1r,Insr,Irs1,Lpin1,Myo5a,Ndel1,Pdk2,Pdk4,Phip,Pik3r1,Plcb1,Pparg,Prkci,Ptpn1,Ptpn2,Ptpra,Rab10,Rhoq,Rps6kb1,Sh2b2,Sik2,Slc2a4,Slc2a8,Soga1,Sorbs1,Srsf3,Syap1,Tsc2,Vamp2,Wdtc1,Xbp1,Zfp106
GO:0071346	cellular response to interferon-gamma	0.00033	0.0142	33	3594	Common	Capg,Ccl2,Cdc42,Dapk1,Eprs,Evl,Flnb,Gbp2b,Gbp3,Gsn,H2-Ab1,Irf1,Irgm1,Kif16b,Kif5b,Mrc1,Myo18a,Myo1c,Nos2,Rab12,Rpl13a,Stat1,Stx4a,Stxbp1,Stxbp2,Stxbp3,Trp53,Vamp3,Vamp4,Vim,Vps26b,Was,Zyx
GO:0043161	proteasome-mediated ubiquitin-dependent protein catabolic process	0.00033	0.0142	33	3594	Common	1500015O10Rik,Agap3,Anapc10,Btrc,Ccdc47,Clock,Cul1,Cul4a,Dnajb9,Dnajc10,Edem1,Edem3,Fbxl3,Fbxo6,Fbxw11,Fbxw7,Gsk3a,Nrros,Otud5,Ppp2cb,Psmb5,Rnf34,Siah1a,Skp1a,Tbl1xr1,Ube2g2,Ube2j1,Ube2w,Wfs1,Wwp1,Wwp2,Wwtr1,Znrf1
GO:0008064	regulation of actin polymerization or depolymerization	0.00033	0.0142	33	3594	Common	Arhgap35,Arpc2,Bbs4,Capza1,Capzb,Carmil1,Cfl1,Coro1a,Dlg1,Dstn,Eps8,Evl,Gsn,Jmy,Map3k1,Mlst8,Mtor,Nckap1,Nckap1l,Pfn2,Plek,Plekhh2,Prkcd,Prkce,Pycard,Rac1,Rictor,Specc1l,Swap70,Twf1,Twf2,Washc1,Wasl
GO:0008630	intrinsic apoptotic signaling pathway in response to DNA damage	0.000345	0.0147	31	3594	Common	Atm,Bad,Bak1,Bax,Bcl2l1,Brca2,Cdkn1a,Ei24,Fnip2,Ier3,Mbd4,Mcl1,Mlh1,Msh2,Msh6,Nfatc4,Nupr1,Pik3r1,Pml,Pnp,Polb,Prkdc,Shisa5,Sirt1,Sod2,Tmem109,Tnfrsf1a,Tnfrsf1b,Topors,Trp53,Uaca
GO:0008360	regulation of cell shape	0.000345	0.0147	31	3594	Common	Anxa7,Arap3,Arhgap35,Baiap2,Cfdp1,Coro1a,Csf1r,Epb41l3,Eps8,Fgd1,Fgr,Fyn,Gas7,Gna12,Gna13,Hexb,Lpar1,Mkln1,Myh10,Myh9,Myl12b,Plekho1,Plxnb1,Ptk2b,Pxn,Rhoj,Rhoq,Rhou,Sema4a,Shroom3,Wdr1
GO:0016241	regulation of macroautophagy	0.000354	0.0151	27	3594	Common	Becn1,Cdc37,Clec16a,Ehmt2,Hif1a,Hmox1,Htra2,Ift20,Ift88,Irgm1,Map3k7,Mfn2,Mtm1,Mtor,Nod1,Npc1,Poldip2,Rab12,Ripk2,Sh3glb1,Sirt1,Smurf1,Tbk1,Tigar,Tlr2,Trp53,Tsc2
GO:0048008	platelet-derived growth factor receptor signaling pathway	0.000366	0.0155	18	3594	Common	Arid5b,Bcar1,Csrnp1,Gab1,Iqgap1,Itgb3,Myo1e,Pdgfc,Pdgfra,Pdgfrb,Plat,Plekha1,Ptpn1,Rapgef1,Sgpl1,Tiparp,Txnip,Zfand5
GO:0042981	regulation of apoptotic process	0.000375	0.0158	298	3594	Common	Aamdc,Aars,Abraxas2,Adam17,Adam8,Adar,Ago4,Ahi1,Aifm1,Akr1b3,Aldh1a3,Alkbh1,Alms1,Ambra1,Angptl4,Ano6,Anxa1,Apaf1,Apbb2,Apc,Arhgap10,Arrb1,Atg5,Atg7,Atp7a,Axl,B4galt1,Bad,Bag1,Bag3,Bag6,Bak1,Bax,Bcl10,Bcl2l1,Bcl3,Bcl6,Bdnf,Becn1,Bid,Birc6,Bmp4,Bnip3l,Bok,Braf,Capn10,Casp3,Casp8,Casp8ap2,Casp9,Cav1,Ccr5,Cd248,Cd44,Cd74,Cdc73,Cdk11b,Cdkn1b,Cebpb,Cfdp1,Cflar,Chd8,Ciapin1,Cib1,Cidea,Clec5a,Cln3,Cln8,…
GO:0051568	histone H3-K4 methylation	0.000382	0.0159	12	3594	Common	Arid4a,Ash1l,Ctr9,Kmt2a,Kmt2b,Kmt2d,Ncoa6,Rbbp5,Rtf1,Setd1a,Tet2,Wdr82
GO:0006413	translational initiation	0.000382	0.0159	12	3594	Common	Dhx33,Eif3a,Eif3b,Eif3c,Eif3d,Eif3e,Eif3f,Eif3h,Eif3i,Eif3k,Eif3l,Eif4ebp1
GO:1903362	regulation of cellular protein catabolic process	0.000383	0.0159	45	3594	Common	Anks1,Anxa2,Atg7,Atp13a2,Axin1,Bag6,Btrc,Chfr,Clec16a,Csnk1d,Csnk1e,Edem1,Edem2,Fbxl5,Fbxo22,Fbxw7,Fmr1,Gba,Gclc,Gna12,Herpud1,Il33,Lrrk2,Mtm1,Mylip,N4bp1,Ophn1,Pias1,Psen1,Psen2,Ptk2,Ptk2b,Rpl11,Sco1,Senp1,Sirt2,Sumo3,Tmf1,Tnfaip3,Trib1,Trib2,Ube2k,Usp19,Vps35,Xbp1
GO:0006163	purine nucleotide metabolic process	0.00041	0.017	64	3594	Common	Acaca,Acacb,Acot9,Acss1,Acss2,Adcy3,Adcy4,Adcy5,Adcy6,Adcy7,Adcy9,Adk,Adss,Ampd2,Atp7a,Bad,Bid,Ces1d,Coasy,Coq9,Crot,Dgat1,Dgat2,Dguok,Dld,Enpp1,Galk1,Galt,Gpam,Gpi1,Gucy1a1,Guk1,Hk1,Impdh1,Impdh2,Itpa,Ldha,Mecp2,Mlycd,Mocs1,Mpc1,Msh2,Mthfd1,Ndufa10,Npr2,Nt5e,Nudt7,Nudt9,Pank1,Pank2,Pank3,Papss1,Pde4b,Pde4d,Pde5a,Pdha1,Pfkm,Pgk1,Pkm,Pnp,Scp2,Slc25a25,Stoml2,Vcp
GO:0097193	intrinsic apoptotic signaling pathway	0.000413	0.017	53	3594	Common	Aifm1,Apaf1,Atm,Bad,Bag6,Bak1,Bax,Bcl2l1,Bnip3,Brca2,Casp3,Cdkn1a,Cebpb,Cyp1b1,Dab2ip,Ei24,Eif2ak3,Ern1,Ero1l,Fnip2,Gpx1,Gsk3b,Htra2,Ier3,Itpr1,Jmy,Map3k5,Mbd4,Mcl1,Mlh1,Msh2,Msh6,Nbn,Nfatc4,Nupr1,Pik3r1,Pml,Pnp,Polb,Prkca,Prkdc,Sgpp1,Shisa5,Sirt1,Sod2,Tmbim6,Tmem109,Tnfrsf1a,Tnfrsf1b,Topors,Trp53,Uaca,Xbp1
GO:0043085	positive regulation of catalytic activity	0.000413	0.017	151	3594	Common	Abhd5,Ace,Adam8,Adipoq,Ajuba,Antxr1,Apaf1,Arhgap24,Arhgef5,Atp7a,Axin1,Bad,Bak1,Bax,Bcas3,Bcl10,Bid,Bok,C1galt1c1,C1qtnf2,Cab39,Casp8,Casp8ap2,Casp9,Cav1,Ccdc88a,Ccs,Cdc42,Cdk5,Cenpe,Cib1,Coro1c,Csf1r,Cspg4,Ctnnb1,Cyr61,Dab2,Dab2ip,Dennd1a,Dennd1b,Dkc1,Dlg1,Dnajc10,Dock10,Dock11,Dock9,Dvl2,Eif2ak3,Erbb2,Ern1,Gab1,Gadd45g,Gclm,Gprc5b,Gsk3a,Hgf,Hmgn1,Hnrnpd,Hspa2,Hsph1,Iqgap1,Irak1,Irs1,Itgam,Jak2,…
GO:0043069	negative regulation of programmed cell death	0.000421	0.0172	212	3594	Common	Aamdc,Aars,Abraxas2,Adam8,Adar,Ago4,Ahi1,Akr1b3,Alkbh1,Alms1,Ambra1,Angptl4,Apc,Arhgap10,Arrb1,Atg5,Atg7,Atp7a,Axl,Bad,Bag1,Bag3,Bax,Bcl2l1,Bcl3,Bcl6,Bdnf,Becn1,Bid,Birc3,Birc6,Bmp4,Bok,Braf,Cav1,Ccr5,Cd44,Cd74,Cdc73,Cdk11b,Cdkn1b,Cebpb,Cfdp1,Cflar,Chd8,Ciapin1,Cib1,Cidea,Clec5a,Cln3,Cln8,Creb3l1,Cryab,Csf1r,Ctnna1,Ctnnb1,Ctsh,Cx3cl1,Cx3cr1,Cyr61,Dab2,Dad1,Dapk1,Daxx,Ddb1,Dnaja3,Dock8,Efna1,Eif2a…
GO:0031326	regulation of cellular biosynthetic process	0.000422	0.0172	748	3594	Common	Aamdc,Aars,Aatf,Ablim1,Acadl,Acadvl,Aco1,Acvr1,Acvr2a,Acvrl1,Adam8,Adgrf5,Adipoq,Aebp1,Aebp2,Aff1,Ago1,Ahctf1,Ahi1,Ahr,Ajuba,Akirin2,Ankrd1,Apbb1,Apbb2,App,Arid1a,Arid5b,Arnt,Arntl2,Ash1l,Asxl2,Atf3,Atf6,Atf7ip,Atg7,Atm,Atmin,Atoh8,Atp1a1,Atr,Atrx,Atxn1,Atxn7,Axin1,Bach1,Bag1,Banp,Baz2a,Bcl10,Bcl3,Bcl6,Bcor,Bhlhe40,Bmi1,Bmp3,Bmp4,Bmp6,Bmper,Bmpr1a,Bmpr1b,Bmpr2,Brca2,Brwd1,Btrc,C1qtnf2,Carm1,Cat,C…
GO:0034341	response to interferon-gamma	0.000436	0.0176	36	3594	Common	Capg,Ccl2,Cdc42,Ciita,Dapk1,Eprs,Evl,Flnb,Gbp2b,Gbp3,Gsn,H2-Aa,H2-Ab1,H2-Eb1,Irf1,Irgm1,Kif16b,Kif5b,Mrc1,Myo18a,Myo1c,Nos2,Rab12,Rpl13a,Stat1,Stx4a,Stxbp1,Stxbp2,Stxbp3,Trp53,Vamp3,Vamp4,Vim,Vps26b,Was,Zyx
GO:0031663	lipopolysaccharide-mediated signaling pathway	0.000438	0.0176	15	3594	Common	Cd14,Irak1,Irak2,Irf3,Lyn,Mapk1,Mapk14,Mapk3,Myd88,Nfkbia,Nos3,Prkce,Ripk2,Stat1,Tlr4
GO:0007097	nuclear migration	0.000438	0.0176	15	3594	Common	Cdc42,Cdc42bpa,Cep120,Dock7,Fhod1,Myh10,Ntn1,Pcm1,Ptk2,Sun1,Sun2,Syne1,Syne2,Tacc1,Tmem201
GO:0018193	peptidyl-amino acid modification	0.000458	0.0183	125	3594	Common	Acvr1b,Adh5,Agbl5,Agtpbp1,Arid4a,Ash1l,Atp7a,Baz2a,Bgn,Brd4,Brpf1,Btk,Camk2d,Carm1,Cbx4,Cdk5,Clk1,Clk2,Clk3,Clk4,Crtap,Csf1r,Ctr9,Dclk1,Dcn,Ddr1,Dyrk1a,Ehmt1,Ehmt2,Eif2ak3,Ep300,Eya1,Ezh2,Fgr,Fyn,Gsk3b,Hdac2,Hdac6,Hipk2,Hipk3,Igf1r,Insr,Jak1,Jak2,Kat14,Kat2a,Kat2b,Kat6a,Kat6b,Kdm3a,Kdr,Kmt2a,Kmt2b,Kmt2d,Kmt5b,Ldb1,Loxl3,Lyn,Mamdc2,Map3k12,Mapk1,Mapk14,Mapk7,Mapk8,Mecp2,Mgat2,Mtor,Ncoa1,Ncoa6,Nlk,…
GO:0009259	ribonucleotide metabolic process	0.000459	0.0183	59	3594	Common	Acaca,Acacb,Acot9,Acss1,Acss2,Adcy3,Adcy4,Adcy5,Adcy6,Adcy7,Adcy9,Adss,Ampd2,Atp7a,Bad,Bid,Ces1d,Coasy,Coq9,Crot,Dgat1,Dgat2,Dld,Enpp1,Galk1,Galt,Gpam,Gpi1,Gucy1a1,Hk1,Itpa,Ldha,Mecp2,Mlycd,Mocs1,Mpc1,Msh2,Ndufa10,Npr2,Nt5e,Nudt7,Nudt9,Pank1,Pank2,Pank3,Papss1,Pde4b,Pde4d,Pde5a,Pdha1,Pfkm,Pgk1,Pkm,Pnp,Rnaseh2b,Scp2,Slc25a25,Stoml2,Vcp
GO:0048284	organelle fusion	0.000461	0.0183	20	3594	Common	Bloc1s6,C2cd5,Chmp5,Dysf,Mfn1,Mfn2,Miga1,Miga2,Opa1,Rab34,Samd9l,Snapin,Spg11,Stoml2,Stx3,Stx4a,Stxbp1,Usp30,Uvrag,Vamp3
GO:0033673	negative regulation of kinase activity	0.000471	0.0186	51	3594	Common	Adar,Adipoq,Aida,Ajuba,Casp3,Cav1,Cdkn1a,Cdkn1b,Cdkn2c,Chordc1,Dab2ip,Dusp16,Errfi1,Fabp4,Fbxo7,Gadd45a,Gadd45g,Ggnbp2,Hipk3,Hspb1,Irak3,Kat2b,Lyn,Mapk7,Nf1,Nf2,Pik3ip1,Pkib,Pkig,Prkar1a,Prkca,Prkrip1,Psen1,Psen2,Ptpn2,Ptpn6,Ptprc,Ptprj,Rgs2,Sh3bp5,Shb,Smyd3,Sorl1,Spred1,Spred2,Spred3,Spry2,Tnfaip3,Tsc2,Ubash3b,Washc1
GO:0050789	regulation of biological process	0.000479	0.0188	2288	3594	Common	2700049A03Rik,3110043O21Rik,Aamdc,Aars,Aatf,Abca1,Abca5,Abhd17b,Abhd2,Abhd5,Abi3bp,Ablim1,Abr,Abraxas2,Acacb,Acadl,Acadm,Acadvl,Ace,Aco1,Acsl4,Acvr1,Acvr1b,Acvr2a,Acvrl1,Adam10,Adam17,Adam8,Adam9,Adamts9,Adar,Adcy3,Adcy4,Adcy6,Adcy9,Add1,Adgra2,Adgre5,Adgrf5,Adgrg1,Adgrg6,Adgrl2,Adgrl3,Adipoq,Adipor2,Adm,Adnp2,Aebp1,Aebp2,Aff1,Ago1,Ago2,Ago4,Ahctf1,Ahcyl1,Ahi1,Ahnak,Ahr,Aida,Aif1,Aifm1,Aimp1,Ajub…
GO:0034645	cellular macromolecule biosynthetic process	0.00048	0.0188	170	3594	Common	Aars,Abca1,Acadm,Acan,Aff1,Ahr,Atad5,Atg16l1,Atg5,Atp7a,Atrx,B4galt1,B4gat1,Brca2,C1galt1c1,Calcoco1,Cavin1,Cdkal1,Chst3,Col4a2,Cytl1,Ddx17,Ddx5,Dhx33,Dnaja3,Dnajc2,Dpagt1,E4f1,Eef2k,Eif2a,Eif2ak3,Eif2s1,Eif3a,Eif3b,Eif3c,Eif3d,Eif3e,Eif3f,Eif3h,Eif3i,Eif3k,Eif3l,Eif3m,Eif4ebp1,Eogt,Eprs,Ext1,Ext2,Fbxo18,Fkrp,Foxo3,Galnt1,Galnt10,Galnt7,Gars,Ggta1,Gorasp1,Gtf2h5,Gtpbp2,Gys1,Helb,Hif1a,Hivep2,Hnrn…
GO:0032446	protein modification by small protein conjugation	0.000486	0.0189	71	3594	Common	Arrdc4,Asb2,Atg7,Axin1,Bmi1,Btrc,Cbx4,Chfr,Eya1,Fbxl3,Fbxo22,Fbxo25,Fbxw11,Fem1b,G2e3,Hdac6,Hectd1,Herc4,Itch,Jade2,Klhl2,Ltn1,March1,March8,Mgrn1,Nedd4,Pcgf3,Pcgf5,Pdzrn3,Peli1,Pias1,Pias2,Pias3,Pja1,Rlim,Rnf111,Rnf115,Rnf13,Rnf149,Rnf2,Rnf20,Rnf220,Rnf25,Rnf31,Rnf41,Rnf6,Smurf1,Sumo3,Suz12,Taz,Traf6,Trim24,Trim3,Trim32,Trim37,Uba5,Uba6,Ube2a,Ube2f,Ube2g1,Ube2w,Ube2z,Ube3a,Ube4a,Ube4b,Ubr2,Ufm1,…
GO:0007155	cell adhesion	0.000487	0.0189	122	3594	Common	Aatf,Acvr1,Adam8,Adam9,Adamts9,Adgrl3,Ajuba,Axl,Bcam,Boc,Cadm1,Cadm3,Cd44,Cd99l2,Cdc42,Cdh2,Cdh5,Cdk5,Cdon,Celsr2,Cfdp1,Col5a3,Ctgf,Ctnna1,Ctnnb1,Ctnnd1,Cxcl12,Cyp1b1,Cyr61,Dchs1,Ddr1,Dlc1,Esam,F11r,Farp2,Fat1,Fat4,Fermt2,Flrt2,Fn1,Fndc3a,Fndc3b,Fzd4,Fzd7,Gpnmb,Icam1,Itga1,Itga4,Itga5,Itga6,Itga7,Itgal,Itgam,Itgav,Itgb1,Itgb2,Itgb4,Jam3,Jup,Kirrel,Lims1,Mertk,Mkln1,Mpdz,Myh9,Myo1g,Ncam1,Nectin1,N…
GO:0043068	positive regulation of programmed cell death	0.00049	0.0189	111	3594	Common	Adam8,Aifm1,Aldh1a3,Ano6,Anxa1,Apaf1,Apbb2,Apc,B4galt1,Bad,Bag1,Bak1,Bax,Bcl10,Bcl2l1,Bid,Bnip3l,Bok,Capn10,Casp3,Casp8,Casp8ap2,Casp9,Cd248,Cdkn1a,Ctnna1,Cyp1b1,Dab2ip,Daxx,Ddx20,Degs1,Eef1e1,Ei24,Eif2ak3,Eif5a,Fam162a,Fap,Fas,Fbxw7,Flcn,Fnip1,Gsk3a,Gsk3b,Hmox1,Htra2,Hyal2,Inpp5d,Itm2c,Jak2,Jmy,Lrp6,Lyn,Maged1,Map2k4,Map3k5,Mcl1,Mef2c,Ncoa1,Nf1,Nfatc4,Nr4a1,Nupr1,P2rx7,Park7,Pawr,Pdcd6,Pdcd7,Pdi…
GO:0010941	regulation of cell death	0.000491	0.0189	322	3594	Common	Aamdc,Aars,Abraxas2,Adam17,Adam8,Adar,Adnp2,Ago4,Ahi1,Ahr,Aifm1,Akr1b3,Aldh1a3,Alkbh1,Alms1,Ambra1,Angptl4,Ano6,Anxa1,Apaf1,Apbb2,Apc,Arhgap10,Arrb1,Atg5,Atg7,Atp7a,Axl,B4galt1,Bad,Bag1,Bag3,Bag6,Bak1,Bax,Bcl10,Bcl2l1,Bcl3,Bcl6,Bdnf,Becn1,Bid,Birc3,Birc6,Bmp4,Bnip3l,Bok,Braf,Btbd10,Capn10,Casp3,Casp8,Casp8ap2,Casp9,Cav1,Ccr5,Cd248,Cd44,Cd74,Cdc73,Cdk11b,Cdkn1a,Cdkn1b,Cebpb,Cfdp1,Cflar,Chd8,Ciapin…
GO:0044093	positive regulation of molecular function	0.000492	0.0189	220	3594	Common	Abhd5,Ace,Adam8,Adipoq,Ajuba,Ank2,Antxr1,Anxa2,Apaf1,Arhgap24,Arhgef5,Arid5b,Arrb1,Atp1b1,Atp7a,Axin1,Bad,Bak1,Bax,Bcas3,Bcl10,Bid,Bok,Brd4,C1galt1c1,C1qtnf2,Cab39,Carm1,Casp8,Casp8ap2,Casp9,Cat,Cav1,Ccdc88a,Ccs,Cd84,Cdc42,Cdk5,Cenpe,Cflar,Cib1,Clock,Cnksr3,Coro1c,Crebbp,Crtc2,Csf1r,Cspg4,Ctbp2,Ctnnb1,Ctss,Cyr61,Cytl1,Dab2,Dab2ip,Dennd1a,Dennd1b,Dhx33,Dkc1,Dlg1,Dmd,Dnajc10,Dock10,Dock11,Dock9,Dvl…
GO:0016477	cell migration	0.000498	0.019	225	3594	Common	Acvr1,Adam8,Adam9,Adgra2,Adgrg1,Adgrl3,Aimp1,Ajuba,Alkbh1,Amotl1,Anks1,Ano6,Anxa1,Apc,Arhgap24,Arhgap35,Arhgef5,Arid5b,Arl13b,Aspm,Atp5b,Axl,B4galt1,Bax,Bbs4,Bcar1,C5ar1,Cap1,Ccdc141,Ccl2,Ccr1,Cd248,Cd34,Cd99l2,Cdh2,Cdk5,Celsr2,Cfl1,Clasp2,Clec14a,Cln3,Coro1a,Coro7,Cspg4,Ctgf,Ctnnb1,Cul5,Cx3cl1,Cx3cr1,Cxcl12,Cxcl16,Cxcr4,Cyp1b1,Dab2ip,Dchs1,Ddr1,Dixdc1,Dock1,Dock8,Ednrb,Efnb1,Egfr,Elp3,Eng,Epha3,…
GO:0043408	regulation of MAPK cascade	0.000509	0.0194	138	3594	Common	Adam8,Adipoq,Aida,Ajuba,Ankrd26,Apc,Arrb1,Ash1l,Atf3,Atp6ap1,Axin1,Bmp4,Bnip2,Braf,C1qtnf1,C1qtnf2,Cav1,Cavin3,Cd36,Cd44,Cd74,Cd84,Cdc42,Cdon,Cib1,Cnksr3,Csf1r,Cspg4,Dab2,Dab2ip,Dact1,Dhx33,Dmd,Dusp16,Dusp22,Dvl2,Efna1,Ern1,F2r,Fcgr2b,Fgfr2,Flcn,Gab1,Gadd45g,Gcnt2,Gpnmb,Hgf,Hipk3,Hmgb1,Id1,Igf1r,Irak1,Irak3,Itch,Jun,Ksr1,Lamtor1,Lamtor2,Lamtor3,Lemd2,Lpar1,Lyn,Madd,Maged1,Map2k1,Map2k3,Map3k1,Map…
GO:0042327	positive regulation of phosphorylation	0.000522	0.0198	189	3594	Common	Ace,Acvr1,Adam8,Adipoq,Ajuba,Arrb1,Arrb2,Atg14,Atp6ap1,Axin1,Bad,Bcar3,Bdnf,Bmp4,Bmp6,Bnip2,Braf,Btbd10,C1qtnf1,C1qtnf2,Cab39,Cavin3,Ccdc88a,Cd36,Cd44,Cd74,Cd84,Cdc42,Cdk5,Cdon,Cenpe,Cib1,Clip3,Cln3,Crebl2,Csf1r,Cspg4,Cxcr4,Dab2,Dab2ip,Dhx33,Dlg1,Dusp22,Dvl2,Efna1,Eif4g3,Erbb2,Ern1,F2r,Fam129a,Fam20a,Fcgr2b,Fgf1,Flcn,Fmr1,Fyn,Fzd1,Gab1,Gadd45g,Gcnt2,Gdf10,Ghr,Gpnmb,Gprc5b,Gsk3a,Gsk3b,Hcls1,Hdac6,…
GO:1903050	regulation of proteolysis involved in cellular protein catabolic process	0.000536	0.0202	39	3594	Common	Anks1,Atg7,Axin1,Bag6,Btrc,Chfr,Clec16a,Csnk1d,Csnk1e,Edem1,Edem2,Fbxo22,Fbxw7,Fmr1,Gba,Gclc,Gna12,Herpud1,Il33,Lrrk2,Mtm1,N4bp1,Ophn1,Pias1,Psen1,Psen2,Ptk2,Ptk2b,Rpl11,Sco1,Senp1,Sirt2,Sumo3,Tmf1,Trib1,Trib2,Ube2k,Usp19,Xbp1
GO:0034097	response to cytokine	0.000536	0.0202	127	3594	Common	Adipor2,Bad,Bbs2,Bbs4,Btk,Capg,Ccl2,Cd300lf,Cd74,Cdc42,Cdk4,Cib1,Ciita,Cnot9,Coro1a,Csf1,Csf1r,Csf2ra,Ctr9,Cx3cl1,Cx3cr1,Cxcr4,Dab2ip,Dapk1,Ddx41,Eprs,Etv3,Evl,Fabp4,Flnb,Gab1,Gbp2b,Gbp3,Gsk3a,Gsk3b,Gsn,H2-Aa,H2-Ab1,H2-Eb1,Hsp90ab1,Hspa5,Ifi204,Ifit2,Ifitm3,Ifnar1,Ikbkb,Ikbke,Il11ra1,Il1r1,Il1rap,Il3ra,Il6ra,Il6st,Impdh2,Irak1,Irak3,Irak4,Irf1,Irgm1,Jagn1,Jak1,Jak2,Keap1,Kif16b,Kif5b,Klf6,Lrch1,M…
GO:0019693	ribose phosphate metabolic process	0.000546	0.0205	60	3594	Common	Acaca,Acacb,Acot9,Acss1,Acss2,Adcy3,Adcy4,Adcy5,Adcy6,Adcy7,Adcy9,Adss,Ampd2,Atp7a,Bad,Bid,Ces1d,Coasy,Coq9,Crot,Dgat1,Dgat2,Dld,Enpp1,Galk1,Galt,Gpam,Gpi1,Gucy1a1,H6pd,Hk1,Itpa,Ldha,Mecp2,Mlycd,Mocs1,Mpc1,Msh2,Ndufa10,Npr2,Nt5e,Nudt7,Nudt9,Pank1,Pank2,Pank3,Papss1,Pde4b,Pde4d,Pde5a,Pdha1,Pfkm,Pgk1,Pkm,Pnp,Rnaseh2b,Scp2,Slc25a25,Stoml2,Vcp
GO:0016311	dephosphorylation	0.000553	0.0205	44	3594	Common	Btrc,Ctdspl2,Cttnbp2nl,Dusp3,Dusp6,Eya1,Eya3,Fbxw11,Inpp5b,Inpp5f,Inpp5k,Mtmr2,Nceh1,Ocrl,Plpp1,Ppm1a,Ppm1b,Ppm1g,Ppm1m,Ppp1cb,Ppp1cc,Ppp1r12a,Ppp1r15a,Ppp1r15b,Ppp2ca,Ppp2r1a,Ppp3ca,Ppp3cb,Ppp3r1,Ppp4r3a,Ppp4r3b,Ptpn1,Ptpn12,Ptpn2,Ptpn22,Ptpn6,Ptpn7,Ptprb,Ptprc,Ptprk,Ptpro,Sdhaf2,Synj1,Ubash3b
GO:0048771	tissue remodeling	0.000553	0.0205	44	3594	Common	Acvrl1,Ahr,Angpt2,Atg5,Atp7a,Axl,Bmpr2,Capn1,Cav1,Chd7,Ctnnb1,Dll4,Enpp1,Epas1,Epha2,Flna,Gja5,Hif1a,Hoxa3,Igf1,Igfbp5,Itga4,Jag1,Lgr4,Lipa,Lrrk1,Ltbp3,Mef2c,Mitf,Ncdn,Nfatc3,Nos3,Nox4,P3h4,Pbrm1,Pth1r,Ptk2b,Rassf2,Rbpj,Sema3c,Src,Tgfb2,Tgfbr3,Traf6
GO:0017148	negative regulation of translation	0.000556	0.0206	28	3594	Common	Cnot6l,Cpeb1,Cpeb2,Eif2ak3,Eif2ak4,Eif2s1,Eif4e,Eif4ebp1,Eif4ebp2,Eif4enif1,Eprs,Fmr1,Fxr1,Gapdh,Ilf3,Mettl14,Mettl16,Mettl3,Paip2,Qk,Rara,Rc3h1,Rpl13a,Tia1,Zc3h12a,Zfp36,Zfp36l1,Zfp36l2
GO:0043065	positive regulation of apoptotic process	0.000567	0.0209	109	3594	Common	Adam8,Aifm1,Aldh1a3,Ano6,Anxa1,Apaf1,Apbb2,Apc,B4galt1,Bad,Bag1,Bak1,Bax,Bcl10,Bcl2l1,Bid,Bnip3l,Bok,Capn10,Casp3,Casp8,Casp8ap2,Casp9,Cd248,Ctnna1,Cyp1b1,Dab2ip,Daxx,Ddx20,Degs1,Eef1e1,Ei24,Eif2ak3,Eif5a,Fam162a,Fap,Fas,Fbxw7,Flcn,Fnip1,Gsk3a,Gsk3b,Hmox1,Htra2,Hyal2,Inpp5d,Itm2c,Jak2,Jmy,Lrp6,Lyn,Maged1,Map2k4,Map3k5,Mcl1,Mef2c,Ncoa1,Nf1,Nfatc4,Nr4a1,Nupr1,P2rx7,Park7,Pdcd6,Pdcd7,Pdia3,Pea15a,Pm…
GO:0009890	negative regulation of biosynthetic process	0.000575	0.0211	327	3594	Common	Aatf,Acadl,Acadvl,Adipoq,Aebp2,Ahr,Ajuba,Apbb1,Arid1a,Asxl2,Atf3,Atf7ip,Atg7,Atoh8,Atp1a1,Atrx,Axin1,Bach1,Baz2a,Bcl3,Bcl6,Bcor,Bhlhe40,Bmi1,Bmp4,Bmp6,Brca2,Cav1,Cbx1,Cbx3,Cbx4,Cbx5,Cc2d1b,Ccnd3,Cd276,Cd36,Cdc73,Cdk6,Cebpb,Cebpd,Chd8,Cic,Ciita,Cipc,Clk2,Clock,Cnot6l,Cops2,Cpeb1,Cpeb2,Crebbp,Crem,Cry2,Ctbp2,Ctcf,Ctnnb1,Ctr9,Cul3,Cux1,Daxx,Ddx20,Dicer1,Dll4,Dmap1,Dnajc2,Dnmt1,Dnmt3a,Drap1,Ednrb,Efn…
GO:0015031	protein transport	0.000585	0.0214	144	3594	Common	Agap3,Ahcyl1,Ap1b1,Ap1g1,Ap1m1,Ap2a1,Ap2m1,Ap3b1,Ap4e1,Ap4m1,Ap4s1,Arf1,Arf5,Arf6,Arl6ip1,Arrdc4,Bcr,Bid,Bloc1s6,Cacna1c,Cd36,Cd74,Cdk5,Cep290,Cep57,Clip1,Cttn,Cyb5r4,Derl2,Erbin,Foxp1,Gnptab,Gpam,Gsk3b,H2-DMa,Hps1,Hspa9,Htt,Ift20,Il1rap,Il1rn,Ing1,Ipo11,Ipo5,Ipo7,Ipo9,Itgav,Kif13a,Kpna2,Kpna4,Kpna6,Kpnb1,Lamp2,Lcp2,Lyst,M6pr,Mcoln2,Mlph,Mmp12,Mon1a,Msr1,Myo1b,Myo5a,Myo7a,Nagpa,Napa,Nfkbia,Npm1,N…
GO:0060548	negative regulation of cell death	0.000615	0.0224	225	3594	Common	Aamdc,Aars,Abraxas2,Adam8,Adar,Adnp2,Ago4,Ahi1,Ahr,Akr1b3,Alkbh1,Alms1,Ambra1,Angptl4,Apc,Arhgap10,Arrb1,Atg5,Atg7,Atp7a,Axl,Bad,Bag1,Bag3,Bax,Bcl2l1,Bcl3,Bcl6,Bdnf,Becn1,Bid,Birc3,Birc6,Bmp4,Bok,Braf,Btbd10,Cav1,Ccr5,Cd44,Cd74,Cdc73,Cdk11b,Cdkn1b,Cebpb,Cfdp1,Cflar,Chd8,Ciapin1,Cib1,Cidea,Clec5a,Cln3,Cln8,Creb3l1,Cryab,Csf1r,Ctnna1,Ctnnb1,Ctsh,Cx3cl1,Cx3cr1,Cyr61,Dab2,Dad1,Dapk1,Daxx,Ddb1,Dnaja3,…
GO:0045862	positive regulation of proteolysis	0.000631	0.0226	58	3594	Common	Adam8,Adam9,Antxr1,Apaf1,Atg7,Axin1,Bad,Bak1,Bax,Bcl10,Bid,Bok,C3,Casp8,Casp8ap2,Casp9,Chfr,Csnk1d,Csnk1e,Ctnnd1,Edem1,Edem2,Eif2ak3,Fbxo22,Fbxw7,Fmr1,Fuz,Gba,Gclc,Gsn,Il33,Jak2,Lrrk2,Mapk14,Mapk3,Myh9,Pdcd6,Pias1,Picalm,Plgrkt,Pml,Psen1,Psen2,Ptk2,Ptk2b,Pycard,Rgma,Rhbdd1,Rock2,Sfrp2,Sirt2,Stat1,Sumo3,Trib1,Trib2,Uaca,Vcp,Xbp1
GO:0009150	purine ribonucleotide metabolic process	0.000631	0.0226	58	3594	Common	Acaca,Acacb,Acot9,Acss1,Acss2,Adcy3,Adcy4,Adcy5,Adcy6,Adcy7,Adcy9,Adss,Ampd2,Atp7a,Bad,Bid,Ces1d,Coasy,Coq9,Crot,Dgat1,Dgat2,Dld,Enpp1,Galk1,Galt,Gpam,Gpi1,Gucy1a1,Hk1,Itpa,Ldha,Mecp2,Mlycd,Mocs1,Mpc1,Msh2,Ndufa10,Npr2,Nt5e,Nudt7,Nudt9,Pank1,Pank2,Pank3,Papss1,Pde4b,Pde4d,Pde5a,Pdha1,Pfkm,Pgk1,Pkm,Pnp,Scp2,Slc25a25,Stoml2,Vcp
GO:0010942	positive regulation of cell death	0.000636	0.0226	114	3594	Common	Adam8,Aifm1,Aldh1a3,Ano6,Anxa1,Apaf1,Apbb2,Apc,B4galt1,Bad,Bag1,Bak1,Bax,Bcl10,Bcl2l1,Bid,Bnip3l,Bok,Capn10,Casp3,Casp8,Casp8ap2,Casp9,Cd248,Cdkn1a,Clu,Ctnna1,Cyp1b1,Dab2ip,Daxx,Ddx20,Degs1,Eef1e1,Ei24,Eif2ak3,Eif5a,Fam162a,Fap,Fas,Fbxw7,Fcgr2b,Flcn,Fnip1,Gsk3a,Gsk3b,Hmox1,Htra2,Hyal2,Inpp5d,Itgam,Itm2c,Jak2,Jmy,Lrp6,Lyn,Maged1,Map2k4,Map3k5,Mcl1,Mef2c,Ncoa1,Nf1,Nfatc4,Nr4a1,Nupr1,P2rx7,Park7,Paw…
GO:0048193	Golgi vesicle transport	0.000639	0.0226	17	3594	Common	Arcn1,Bcap31,Bicd2,Creb3l2,Htt,Kif13a,Kif16b,Kif1c,Lman1,Prkd1,Rab14,Sec22b,Trappc3,Vamp2,Vamp3,Vamp4,Whamm
GO:0048002	antigen processing and presentation of peptide antigen	0.000639	0.0226	17	3594	Common	B2m,Bag6,Cd74,Fcgr1,Fcgr2b,H2-Aa,H2-Ab1,H2-D1,H2-DMa,H2-DMb1,H2-Eb1,March1,March8,Tap2,Tapbp,Traf6,Unc93b1
GO:0006826	iron ion transport	0.000639	0.0226	17	3594	Common	B2m,Fth1,Hfe,Mmgt1,Myo1b,Nectin1,Scara5,Sfxn1,Slc11a2,Slc25a37,Slc39a14,Slc40a1,Snx3,Steap2,Steap3,Steap4,Trf
GO:2000378	negative regulation of reactive oxygen species metabolic process	0.000639	0.0226	17	3594	Common	Atg5,Bcr,Becn1,Birc3,Cav1,Gla,Hbp1,Hif1a,Hk2,Map3k7,Park7,Rhoa,Sirt2,Tigar,Trp53,Vdac1,Zc3h12a
GO:0051647	nucleus localization	0.000639	0.0226	17	3594	Common	Bin1,Cdc42,Cdc42bpa,Cep120,Dmd,Dock7,Fhod1,Myh10,Ntn1,Pcm1,Ptk2,Sun1,Sun2,Syne1,Syne2,Tacc1,Tmem201
GO:0048583	regulation of response to stimulus	0.000646	0.0227	769	3594	Common	3110043O21Rik,Abr,Acvr1,Acvr1b,Acvr2a,Acvrl1,Adam17,Adam8,Adar,Adgra2,Adgrg1,Adipoq,Ago1,Aida,Ajuba,Akap13,Akt3,Ankrd26,Ankrd54,Anks1,Ano6,Anxa1,Anxa2,Aoah,Apbb1,Apc,Arap3,Arhgap24,Arhgap35,Arhgap42,Arhgef2,Arid5a,Arl6ip1,Arl6ip5,Arrb1,Arrb2,Arrdc3,Ash1l,Aspn,Atad5,Atf3,Atg5,Atg7,Atm,Atp2a2,Atp2b4,Atp6ap1,Atp6ap2,Atxn1,Atxn7,Axin1,Axl,B2m,Bad,Bap1,Bax,Bbs2,Bbs4,Bcl10,Bcl6,Bcr,Becn1,Bicd1,Bid,Bmp4…
GO:0035904	aorta development	0.000653	0.0229	35	3594	Common	Acvrl1,Adamts6,Adamts9,Ap2b1,Bmpr1a,Chd7,Cntrl,Col3a1,Cxcr4,Dctn5,Dll4,Dnm2,Eng,Eya1,Fuz,Hectd1,Jag1,Kat6a,Lox,Lrp1,Ltbp1,Myh10,Ndst1,Nprl3,Plxnd1,Prickle1,Rbpj,Sec24b,Smad6,Smarca4,Snx17,Srf,Tab1,Tbx2,Tgfb2
GO:0040012	regulation of locomotion	0.000674	0.0235	176	3594	Common	Abhd2,Abr,Adam8,Adamts9,Adgra2,Adgrg1,Adipoq,Ajuba,Aldoa,Amotl1,Ano6,Anxa1,Apc,Aqp1,Arap3,Arhgap5,Arhgef2,Arrdc3,Atp8a1,Bbs2,Bbs4,Bcas3,Bcr,Bmp4,Bmpr2,Braf,C3ar1,C5ar1,Carmil1,Cavin1,Cbll1,Ccl2,Cd74,Cd99l2,Cdk5,Cib1,Col3a1,Coro1a,Coro1c,Csf1r,Ctnna1,Ctsh,Cxcl12,Cxcr4,Cyp1b1,Cyr61,Dab2,Dab2ip,Ddr2,Dll4,Dock8,Ecm1,Efna1,Elp3,Elp5,Epha2,F2r,Fbxw7,Fgr,Gab1,Gab2,Gna12,Gna13,Hif1a,Igsf10,Ikbkap,Il16,Il…
GO:0010558	negative regulation of macromolecule biosynthetic process	0.000695	0.0242	311	3594	Common	Aatf,Adipoq,Aebp2,Ahr,Ajuba,Apbb1,Arid1a,Asxl2,Atf3,Atf7ip,Atoh8,Atrx,Axin1,Bach1,Baz2a,Bcl3,Bcl6,Bcor,Bhlhe40,Bmi1,Bmp4,Bmp6,Brca2,Cav1,Cbx1,Cbx3,Cbx4,Cbx5,Cc2d1b,Ccnd3,Cd276,Cd36,Cdc73,Cdk6,Cebpb,Cebpd,Chd8,Cic,Ciita,Cipc,Clock,Cnot6l,Cops2,Cpeb1,Cpeb2,Crebbp,Crem,Cry2,Ctbp2,Ctcf,Ctnnb1,Ctr9,Cul3,Cux1,Daxx,Ddx20,Dicer1,Dll4,Dmap1,Dnajc2,Dnmt1,Dnmt3a,Drap1,Ednrb,Efna1,Egr1,Ehmt1,Ehmt2,Eif2ak1,Ei…
GO:0045937	positive regulation of phosphate metabolic process	0.000707	0.0244	195	3594	Common	Ace,Acvr1,Adam8,Adgrf5,Adipoq,Ajuba,Arrb1,Arrb2,Atg14,Atp6ap1,Axin1,Bad,Bcar3,Bdnf,Bmp4,Bmp6,Bnip2,Braf,Btbd10,C1qtnf1,C1qtnf2,Cab39,Cavin3,Ccdc88a,Cd36,Cd44,Cd74,Cd84,Cdc42,Cdk5,Cdon,Cenpe,Cib1,Clip3,Cln3,Crebl2,Csf1r,Cspg4,Cxcr4,Dab2,Dab2ip,Dhx33,Dlg1,Dusp22,Dvl2,Efna1,Eif4g3,Erbb2,Ern1,F2r,Fam129a,Fam20a,Fcgr2b,Fgf1,Flcn,Fmr1,Fyn,Fzd1,Gab1,Gadd45g,Gcnt2,Gdf10,Ghr,Gpnmb,Gprc5b,Gsk3a,Gsk3b,Hcls1…
GO:0010562	positive regulation of phosphorus metabolic process	0.000707	0.0244	195	3594	Common	Ace,Acvr1,Adam8,Adgrf5,Adipoq,Ajuba,Arrb1,Arrb2,Atg14,Atp6ap1,Axin1,Bad,Bcar3,Bdnf,Bmp4,Bmp6,Bnip2,Braf,Btbd10,C1qtnf1,C1qtnf2,Cab39,Cavin3,Ccdc88a,Cd36,Cd44,Cd74,Cd84,Cdc42,Cdk5,Cdon,Cenpe,Cib1,Clip3,Cln3,Crebl2,Csf1r,Cspg4,Cxcr4,Dab2,Dab2ip,Dhx33,Dlg1,Dusp22,Dvl2,Efna1,Eif4g3,Erbb2,Ern1,F2r,Fam129a,Fam20a,Fcgr2b,Fgf1,Flcn,Fmr1,Fyn,Fzd1,Gab1,Gadd45g,Gcnt2,Gdf10,Ghr,Gpnmb,Gprc5b,Gsk3a,Gsk3b,Hcls1…
GO:0030832	regulation of actin filament length	0.000713	0.0246	33	3594	Common	Arhgap35,Arpc2,Bbs4,Capza1,Capzb,Carmil1,Cfl1,Coro1a,Dlg1,Dstn,Eps8,Evl,Gsn,Jmy,Map3k1,Mlst8,Mtor,Nckap1,Nckap1l,Pfn2,Plek,Plekhh2,Prkcd,Prkce,Pycard,Rac1,Rictor,Specc1l,Swap70,Twf1,Twf2,Washc1,Wasl
GO:0016242	negative regulation of macroautophagy	0.000736	0.0251	11	3594	Common	Becn1,Clec16a,Ehmt2,Hmox1,Htra2,Mtm1,Mtor,Npc1,Poldip2,Tigar,Trp53
GO:0034405	response to fluid shear stress	0.000736	0.0251	11	3594	Common	Hdac5,Ift88,Mef2c,Mtss1,P2rx7,Pkd2,Ptgs2,Ptk2b,Socs5,Spp1,Src
GO:0043603	cellular amide metabolic process	0.000737	0.0251	94	3594	Common	Aars,Aasdh,Acaca,Acacb,Acot9,Acss1,Acss2,Agk,Becn1,Btd,Cdkal1,Cers2,Cers4,Cers5,Ces1d,Col4a3bp,Cpe,Degs1,Dgat1,Dgat2,Dhx33,Eef2k,Eif2a,Eif2ak3,Eif2s1,Eif3a,Eif3b,Eif3c,Eif3d,Eif3e,Eif3f,Eif3h,Eif3i,Eif3k,Eif3l,Eif3m,Eif4ebp1,Eprs,Ero1lb,G6pdx,Galc,Gars,Gba,Gclc,Gclm,Ghr,Gla,Gm2a,Gpam,Gtpbp2,Hexa,Hexb,Htt,Iars,Idh1,Itgb8,Lamp2,Lars,Mars,Mgst1,Mlycd,Mpc1,Mrpl51,Mthfd1,Ncstn,Nudt7,P2rx7,Pam,Pcsk5,Pd…
GO:0097237	cellular response to toxic substance	0.000779	0.0264	19	3594	Common	Abtb2,Adh5,Atp7a,Cyp1b1,Ezh2,Hmox1,Impact,Itpr2,Kdm6b,Mapk8,Park7,Pink1,Prdx1,Sod1,Sod2,Tnfaip3,Trp53inp1,Zc3h12a,Zfp277
GO:1901700	response to oxygen-containing compound	0.00078	0.0264	261	3594	Common	Abca1,Abr,Acaca,Adcy3,Adcy6,Adgrl3,Adh1,Adh5,Adipoq,Adnp2,Adprhl2,Agap3,Akap8,Akirin2,Ankrd1,Apc,Apod,Arid5a,Atg7,Atp1a2,Atp7a,Bcl2l1,Bcr,C2cd5,C5ar1,Capn10,Capn2,Casp1,Casp9,Ccl2,Cd14,Cd180,Cd36,Cd86,Cdc73,Cdk4,Cdk5,Cebpb,Cfl1,Clk2,Col16a1,Col1a2,Col3a1,Col4a1,Col5a2,Col6a1,Cpeb1,Cpeb4,Creb1,Crem,Cryab,Ctr9,Ctsh,Cxcl16,Cyp1b1,Dab2ip,Dennd4c,Dgat2,Dnmt1,Dnmt3a,Edem3,Egfr,Egr1,Ehmt2,Eif4e,Eif4ebp1…
GO:0045732	positive regulation of protein catabolic process	0.000793	0.0266	43	3594	Common	Adam8,Adam9,Apc,Atg7,Axin1,Cblb,Chfr,Csnk1d,Csnk1e,Cul4b,Dab2ip,Edem1,Edem2,Fbxl5,Fbxo22,Fbxw7,Fmr1,Gba,Gclc,Ier3,Il33,Itch,Lrp1,Lrrk2,Mylip,Ndfip1,Nedd4,Oaz2,Pias1,Psen1,Psen2,Ptk2,Ptk2b,Rgma,Sgsm3,Sirt2,Sox9,Sumo3,Tnfaip3,Trib1,Trib2,Trim32,Xbp1
GO:2000377	regulation of reactive oxygen species metabolic process	0.000793	0.0266	43	3594	Common	Atg5,Bcr,Becn1,Birc2,Birc3,Cav1,Cd36,Clcn3,Cyp1b1,Ddah1,Eif6,Fbln5,Gla,Hbp1,Hif1a,Hk2,Hsp90aa1,Ier3,Igf1,Itgam,Map3k7,Mpv17,Nfe2l2,Park7,Pdgfrb,Pid1,Pink1,Pkd2,Prcp,Ptk2b,Rhoa,Ripk1,Sirt2,Sod2,Syk,Szt2,Tigar,Tlr2,Tlr4,Trp53,Tspo,Vdac1,Zc3h12a
GO:0006911	phagocytosis, engulfment	0.000795	0.0266	14	3594	Common	Abca1,Aif1,Becn1,C3,Clcn3,Fcgr1,Fcgr2b,Gsn,Itgam,Itgb2,Mfge8,Myh9,Rac1,Sirpa
GO:0043066	negative regulation of apoptotic process	0.000801	0.0267	207	3594	Common	Aamdc,Aars,Abraxas2,Adam8,Adar,Ago4,Ahi1,Akr1b3,Alkbh1,Alms1,Ambra1,Angptl4,Apc,Arhgap10,Arrb1,Atg5,Atg7,Atp7a,Axl,Bag1,Bag3,Bax,Bcl2l1,Bcl3,Bcl6,Bdnf,Becn1,Bid,Birc6,Bmp4,Bok,Braf,Cav1,Ccr5,Cd44,Cd74,Cdc73,Cdk11b,Cdkn1b,Cebpb,Cfdp1,Cflar,Chd8,Ciapin1,Cib1,Cidea,Clec5a,Cln3,Cln8,Creb3l1,Cryab,Csf1r,Ctnna1,Ctnnb1,Ctsh,Cx3cl1,Cx3cr1,Cyr61,Dab2,Dad1,Dapk1,Daxx,Ddb1,Dock8,Efna1,Eif2ak3,Eya1,Fas,Fgfr2…
GO:0044271	cellular nitrogen compound biosynthetic process	0.000803	0.0267	166	3594	Common	Aars,Aasdh,Acacb,Acss1,Acss2,Adcy3,Adcy4,Adcy5,Adcy6,Adcy7,Adcy9,Adk,Adss,Aff1,Agk,Ahr,Amd1,Ampd2,Calcoco1,Cavin1,Cdkal1,Cers2,Cers4,Cers5,Coasy,Col4a2,Cpox,Cyp1b1,Ddx17,Ddx5,Degs1,Dhx33,Dtymk,Eef2k,Eif2a,Eif2ak3,Eif2s1,Eif3a,Eif3b,Eif3c,Eif3d,Eif3e,Eif3f,Eif3h,Eif3i,Eif3k,Eif3l,Eif3m,Eif4ebp1,Entpd1,Eprs,Fech,Foxo3,G6pdx,Galk1,Galt,Gars,Gclc,Gclm,Gpi1,Gtf2h5,Gtpbp2,Gucy1a1,Helb,Hivep2,Hk1,Hnrnpd…
GO:0051270	regulation of cellular component movement	0.00081	0.0268	175	3594	Common	Abhd2,Abr,Adam17,Adam8,Adamts9,Adgra2,Adgrg1,Adipoq,Ajuba,Aldoa,Amotl1,Ank2,Ano6,Anxa1,Apc,Aqp1,Arap3,Arhgap5,Arhgef2,Atp8a1,B4galt1,Bbs2,Bbs4,Bcas3,Bcl6,Bcr,Bmp4,Bmpr2,Braf,C3ar1,C5ar1,Carmil1,Cav1,Cavin1,Cbll1,Ccl2,Cd74,Cd99l2,Cdk5,Cdkn1b,Cib1,Col3a1,Coro1a,Coro1c,Csf1r,Ctnna1,Ctsh,Cxcl12,Cxcr4,Cyp1b1,Cyr61,Dab2,Dab2ip,Ddr2,Dlg1,Dll4,Dock8,Ecm1,Efna1,Elp3,Elp5,Epha2,F2r,Fbxw7,Fgr,Gab1,Gab2,Gna1…
GO:0031327	negative regulation of cellular biosynthetic process	0.000822	0.0271	322	3594	Common	Aatf,Acadl,Acadvl,Adipoq,Aebp2,Ahr,Ajuba,Arid1a,Asxl2,Atf3,Atf7ip,Atg7,Atoh8,Atp1a1,Atrx,Axin1,Bach1,Baz2a,Bcl3,Bcl6,Bcor,Bhlhe40,Bmi1,Bmp4,Bmp6,Brca2,Cav1,Cbx1,Cbx3,Cbx4,Cbx5,Cc2d1b,Ccnd3,Cd276,Cd36,Cdc73,Cdk6,Cebpb,Cebpd,Chd8,Cic,Ciita,Cipc,Clk2,Clock,Cnot6l,Cops2,Cpeb1,Cpeb2,Crebbp,Crem,Cry2,Ctbp2,Ctcf,Ctnnb1,Ctr9,Cul3,Cux1,Daxx,Ddx20,Dicer1,Dll4,Dmap1,Dnajc2,Dnmt1,Dnmt3a,Drap1,Ednrb,Efna1,Egr…
GO:0007005	mitochondrion organization	0.00083	0.0273	75	3594	Common	Adgrg6,Agtpbp1,Aifm1,Atg13,Atg3,Atg5,Atg7,Atp7a,Bad,Bak1,Bax,Becn1,Bid,Bok,Cav2,Cisd2,Cln8,Col4a3bp,Cox7a2l,Dap3,Ddhd1,Dnaja3,Dnajc11,Dnm1l,Epas1,Fis1,Gsk3a,Gsk3b,Hk2,Hmgcl,Htra2,Htt,Ier3,Jtb,Lig3,Lpin1,Map3k1,Mcl1,Mef2a,Mfn1,Mfn2,Miga1,Miga2,Mrpl15,Mrpl17,Mrpl39,Mtm1,Ndufs6,Nectin2,Opa1,P2rx7,Pank2,Park7,Parp1,Pex5,Pnp,Pnpt1,Poldip2,Ppp2cb,Ptcd2,Rnaseh1,Rrm2b,Sco1,Selenon,Sh3glb1,Slc22a5,Sod2,Sp…
GO:0032868	response to insulin	0.00084	0.0275	54	3594	Common	Apc,C2cd5,Capn10,Cdk4,Dennd4c,Egr1,Eif4ebp1,Eif4ebp2,Eif6,Foxo1,Gsk3a,Gsk3b,Hadha,Igf1r,Inpp5k,Inppl1,Insr,Irs1,Lpin1,Mtor,Myo5a,Ndel1,Pdk2,Pdk4,Phip,Pik3r1,Plcb1,Pparg,Prkci,Ptpn1,Ptpn2,Ptpra,Rab10,Rbp4,Rhoq,Rps6kb1,Scap,Scly,Sesn3,Sh2b2,Sik2,Sirt1,Slc2a4,Slc2a8,Soga1,Sorbs1,Srsf3,Stxbp3,Syap1,Tsc2,Vamp2,Wdtc1,Xbp1,Zfp106
GO:0050873	brown fat cell differentiation	0.000861	0.028	21	3594	Common	Adipoq,Aldh6a1,Arl4a,Bnip3,Cebpb,Ebf2,Ero1l,Fabp4,Itga6,Lama4,Metrnl,Nudt7,Pparg,Prdm16,Ptgs2,Rarres2,Rgs2,Selenbp1,Sh2b2,Slc2a4,Zfp516
GO:0009062	fatty acid catabolic process	0.000861	0.028	21	3594	Common	Abcd1,Abhd16a,Acadl,Acadm,Acadvl,Acot7,Acox1,Acox3,Adipoq,Ces1d,Eci1,Hadha,Hadhb,Hsd17b4,Lipe,Lpin1,Pex13,Pex5,Pex7,Phyh,Slc27a4
GO:0043604	amide biosynthetic process	0.000863	0.028	57	3594	Common	Aars,Aasdh,Acacb,Acss1,Acss2,Agk,Cdkal1,Cers2,Cers4,Cers5,Degs1,Dhx33,Eef2k,Eif2a,Eif2ak3,Eif2s1,Eif3a,Eif3b,Eif3c,Eif3d,Eif3e,Eif3f,Eif3h,Eif3i,Eif3k,Eif3l,Eif3m,Eif4ebp1,Eprs,Gars,Gclc,Gclm,Gtpbp2,Htt,Iars,Lars,Mars,Mpc1,Mrpl51,Mthfd1,P2rx7,Pcsk5,Pdha1,Rack1,Rars,Rbm3,Rpl24,Samd8,Secisbp2,Sepsecs,Sgms1,Sptlc1,Sptlc2,St6galnac6,Tars,Trnau1ap,Wars
GO:0030258	lipid modification	0.000894	0.0287	25	3594	Common	Abcd1,Acadl,Acadm,Acadvl,Acox1,Acox3,Adipoq,Agk,Eci1,Hadha,Hadhb,Hsd17b4,Inpp5b,Inpp5f,Mapk14,Mtmr2,Ocrl,Pex13,Pex5,Pex7,Phyh,Pi4ka,Prkaa1,Slc35c1,Synj1
GO:0001974	blood vessel remodeling	0.000896	0.0287	23	3594	Common	Acvrl1,Ahr,Angpt2,Atg5,Atp7a,Axl,Bmpr2,Chd7,Dll4,Epas1,Flna,Hoxa3,Igf1,Itga4,Jag1,Mef2c,Nfatc3,Nos3,Pbrm1,Rbpj,Sema3c,Tgfb2,Tgfbr3
GO:0050821	protein stabilization	0.000896	0.0287	23	3594	Common	Ank2,Atp1b1,Bag3,Bag6,Creb1,Crebl2,Ep300,Lamp1,Lamp2,Nckap1,Npm1,Park7,Pim1,Pink1,Plpp3,Rtn4,Smo,Stk4,Syvn1,Telo2,Usp19,Usp36,Wfs1
GO:1901135	carbohydrate derivative metabolic process	0.000953	0.0304	156	3594	Common	Acaca,Acacb,Acan,Acot9,Acss1,Acss2,Adcy3,Adcy4,Adcy5,Adcy6,Adcy7,Adcy9,Adk,Adss,Amdhd2,Ampd2,Aoah,Atp7a,B4galt1,B4gat1,Bad,Bax,Bgn,Bid,C1galt1c1,Cemip,Ces1d,Chst2,Chst3,Coasy,Coq9,Crem,Crot,Cytl1,Dcn,Dgat1,Dgat2,Dguok,Dld,Dpagt1,Dsel,Dtymk,Edem1,Edem3,Enpp1,Eogt,Ext1,Ext2,Extl2,Fbxo6,Fkrp,Fut8,Galc,Galk1,Galnt1,Galnt10,Galnt7,Galt,Ganab,Gba,Ggta1,Gla,Gm2a,Gne,Gorasp1,Gpam,Gpd2,Gpi1,Gucy1a1,H6pd,H…
GO:0060341	regulation of cellular localization	0.000969	0.0309	152	3594	Common	Abhd17b,Ank2,Anxa2,Apc,Arf6,Arrb1,Atg5,Atg7,Atp2a2,Bad,Bax,Bcas3,Braf,C2cd2l,Camk1,Capn10,Cav1,Cdh2,Cdk16,Cdk5,Cdkn1a,Chd7,Cib1,Clip3,Commd1,Csnk1e,Ctdspl2,Cyld,Dab2,Dclk1,Ddrgk1,Dmd,Edem1,Edem2,Ei24,Eif2ak3,Fbxo4,Fgr,Fyn,Gab2,Grik5,Gsk3b,Hectd1,Hif1a,Hmgn3,Hsph1,Hyal2,Ier3,Il4ra,Inpp5f,Ipo5,Itgam,Itgb1bp1,Kalrn,Khdrbs1,Lmna,Lrig2,Lrp4,Lrrk2,Lyn,Lypla1,Lzts2,Magi2,Map1b,Map2k1,Mapk1,Mapk14,Mapk3,…
GO:0051345	positive regulation of hydrolase activity	0.00101	0.0322	58	3594	Common	Abhd5,Antxr1,Apaf1,Arhgap24,Arhgef5,Bad,Bak1,Bax,Bcas3,Bcl10,Bid,Bok,Casp8,Casp8ap2,Casp9,Coro1c,Cyr61,Dennd1a,Dennd1b,Dnajc10,Dock10,Dock11,Dock9,Dvl2,Eif2ak3,Erbb2,Hspa2,Jak2,Kalrn,Lpar1,Lrrk2,Mapk14,Mapk3,Mef2c,Myo9b,Ndel1,Nf1,Npnt,Pdcd6,Picalm,Pink1,Plxnb1,Pml,Pycard,Rab3gap1,Ralbp1,Rapgef2,Rgma,Rock2,Sema4d,Sfrp2,Slc39a10,Srgap2,Stat1,Tiam1,Uaca,Vcp,Wnt5a
GO:0000077	DNA damage checkpoint	0.00111	0.0351	16	3594	Common	Atm,Atr,Foxo4,Gigyf2,Hus1,Ier3,Mapk14,Mbd4,Mre11a,Nbn,Pml,Ptpn11,Rpl26,Syf2,Tipin,Trp53
GO:1901652	response to peptide	0.00112	0.0353	71	3594	Common	Adcy6,Apc,C2cd5,Capn10,Cdk4,Creb1,Dennd4c,Egr1,Eif4ebp1,Eif4ebp2,Eif6,Fcgr2b,Foxo1,Ghr,Gsk3a,Gsk3b,Hadha,Igf1,Igf1r,Inpp5k,Inppl1,Insr,Irs1,Jag1,Jak2,Lpin1,Mapk14,Mtor,Myo5a,Ndel1,Nfkbia,Nr4a1,Nr4a2,Pdk2,Pdk4,Phip,Pik3r1,Plcb1,Pparg,Prkci,Ptpn1,Ptpn2,Ptpn22,Ptpra,Rab10,Rbp4,Rhoq,Rps6kb1,Scap,Scly,Sesn3,Sh2b2,Sik2,Sirt1,Slc2a4,Slc2a8,Soga1,Sorbs1,Srsf3,Stat3,Stat5a,Stat5b,Stxbp3,Syap1,Tnfaip3,Tsc2…
GO:0006470	protein dephosphorylation	0.00114	0.036	37	3594	Common	Btrc,Ctdspl2,Cttnbp2nl,Dusp3,Dusp6,Eya1,Eya3,Fbxw11,Nceh1,Plpp1,Ppm1a,Ppm1b,Ppm1g,Ppm1m,Ppp1cb,Ppp1cc,Ppp1r12a,Ppp1r15a,Ppp1r15b,Ppp2ca,Ppp2r1a,Ppp3ca,Ppp3cb,Ppp3r1,Ppp4r3a,Ppp4r3b,Ptpn1,Ptpn12,Ptpn2,Ptpn22,Ptpn6,Ptpn7,Ptprc,Ptprk,Ptpro,Sdhaf2,Ubash3b
GO:0006518	peptide metabolic process	0.00115	0.0361	53	3594	Common	Aars,Aasdh,Becn1,Cdkal1,Cpe,Dhx33,Eef2k,Eif2a,Eif2ak3,Eif2s1,Eif3a,Eif3b,Eif3c,Eif3d,Eif3e,Eif3f,Eif3h,Eif3i,Eif3k,Eif3l,Eif3m,Eif4ebp1,Eprs,Ero1lb,G6pdx,Gars,Gclc,Gclm,Gtpbp2,Iars,Idh1,Lamp2,Lars,Mars,Mgst1,Mrpl51,Ncstn,Pam,Pcsk5,Psen1,Psen2,Rack1,Rars,Rbm3,Rpl24,Secisbp2,Sepsecs,Sod1,Sod2,Tapbp,Tars,Trnau1ap,Wars
GO:0043434	response to peptide hormone	0.00117	0.0364	65	3594	Common	Adcy6,Apc,C2cd5,Capn10,Cdk4,Creb1,Dennd4c,Egr1,Eif4ebp1,Eif4ebp2,Eif6,Foxo1,Ghr,Gsk3a,Gsk3b,Hadha,Igf1,Igf1r,Inpp5k,Inppl1,Insr,Irs1,Jak2,Lpin1,Mtor,Myo5a,Ndel1,Nr4a1,Nr4a2,Pdk2,Pdk4,Phip,Pik3r1,Plcb1,Pparg,Prkci,Ptpn1,Ptpn2,Ptpra,Rab10,Rbp4,Rhoq,Rps6kb1,Scap,Scly,Sesn3,Sh2b2,Sik2,Sirt1,Slc2a4,Slc2a8,Soga1,Sorbs1,Srsf3,Stat3,Stat5a,Stat5b,Stxbp3,Syap1,Tsc2,Vamp2,Wdtc1,Xbp1,Zfp106,Zfp36l1
GO:0001934	positive regulation of protein phosphorylation	0.00119	0.037	178	3594	Common	Ace,Acvr1,Adam8,Adipoq,Ajuba,Arrb1,Arrb2,Atg14,Atp6ap1,Axin1,Bcar3,Bdnf,Bmp4,Bmp6,Bnip2,Braf,C1qtnf1,C1qtnf2,Cab39,Cavin3,Ccdc88a,Cd36,Cd44,Cd74,Cd84,Cdc42,Cdk5,Cdon,Cenpe,Cib1,Clip3,Cln3,Crebl2,Csf1r,Cspg4,Cxcr4,Dab2,Dab2ip,Dhx33,Dlg1,Dusp22,Dvl2,Efna1,Eif4g3,Erbb2,Ern1,F2r,Fam129a,Fam20a,Fcgr2b,Fgf1,Flcn,Fmr1,Fyn,Fzd1,Gab1,Gadd45g,Gcnt2,Gdf10,Ghr,Gpnmb,Gprc5b,Gsk3a,Gsk3b,Hcls1,Hdac6,Hgf,Hmgb1,H…
GO:0031401	positive regulation of protein modification process	0.00128	0.0395	213	3594	Common	Ace,Acvr1,Adam8,Adipoq,Ajuba,Arid5a,Arnt,Arrb1,Arrb2,Asxl2,Atg14,Atg7,Atp6ap1,Axin1,Bcar3,Bdnf,Bmp4,Bmp6,Bnip2,Braf,C1qtnf1,C1qtnf2,Cab39,Cavin3,Ccdc88a,Cd36,Cd44,Cd74,Cd84,Cdc42,Cdk5,Cdon,Cenpe,Chfr,Cib1,Clip3,Cln3,Crebl2,Csf1r,Cspg4,Ctr9,Cxcr4,Dab2,Dab2ip,Dhx33,Dlg1,Dusp22,Dvl2,Dyrk1a,Eed,Efna1,Eif4g3,Erbb2,Ern1,F2r,Fam129a,Fam20a,Fbxo4,Fcgr2b,Fgf1,Flcn,Fmr1,Fyn,Fzd1,Gab1,Gadd45g,Gcnt2,Gdf10,Gh…
GO:0051130	positive regulation of cellular component organization	0.00128	0.0395	218	3594	Common	Add1,Adgre5,Adgrl2,Adgrl3,Ahi1,Ahr,Ankrd27,Ano6,Anxa2,Apc,Arhgap35,Arid5a,Arpc2,Asap1,Asxl2,Atad1,Atm,Atmin,Atp8a1,Atr,Atrx,Bbs4,Bcas3,Bdnf,Bid,Bmpr2,Bok,Braf,C2cd5,C3,Caprin1,Carmil1,Cav1,Cbll1,Ccl2,Cd14,Cd300lf,Cd36,Cd47,Cd53,Cdc37,Cdc42,Cenpe,Cep120,Cfl1,Clec16a,Ctnnb1,Ctr9,Cux1,Cxcl12,D16Ertd472e,Dab2,Dab2ip,Ddhd2,Ddr2,Def8,Dkc1,Dlg1,Dlg5,Dock11,Dock2,Dstn,Dynll1,Eed,Eif4g3,Ephb3,Ercc1,Evl,Fa…
GO:0098732	macromolecule deacylation	0.00131	0.0402	18	3594	Common	Abhd12,Abhd13,Abhd17b,Baz2a,Hdac1,Hdac2,Hdac3,Hdac6,Lypla1,Lypla2,Ndst1,Per1,Per2,Ppt1,Sfpq,Sirt1,Sirt2,Sirt3
GO:0035601	protein deacylation	0.00131	0.0402	18	3594	Common	Abhd12,Abhd13,Abhd17b,Baz2a,Hdac1,Hdac2,Hdac3,Hdac6,Lypla1,Lypla2,Ndst1,Per1,Per2,Ppt1,Sfpq,Sirt1,Sirt2,Sirt3
GO:0048589	developmental growth	0.00133	0.0405	162	3594	Common	3110043O21Rik,Adarb1,Add1,Adm,Ahr,Alkbh1,Ankrd11,Anxa1,Arid2,Arid5b,Aspm,Atm,Atrx,Bdnf,Bmp4,Bmpr1a,Bmpr1b,Bnc2,Brca2,Brd4,Cadm1,Ccm2,Cdc42,Cflar,Clic4,Col27a1,Csf1,Ctc1,Ctnnb1,Ctr9,Cyfip1,Cyfip2,Ddr1,Ddr2,Dicer1,Ehmt2,Eif2ak4,Eif4h,Ercc1,Ercc5,Esr1,Ezh2,Fgf1,Fgfr2,Foxo3,Fubp1,Fzd7,Gas1,Gigyf2,Gja1,Gli3,Gpx1,H3f3a,Hdac6,Icmt,Ifrd1,Igf1,Impact,Ints1,Itgb1,Kat2a,Kdm1a,Kdm2a,Kdm5b,Kdm6a,Kif26b,Kmt2c,…
GO:0048522	positive regulation of cellular process	0.00134	0.0409	1091	3594	Common	Aamdc,Abhd5,Ablim1,Ace,Acvr1,Acvrl1,Adam17,Adam8,Adam9,Add1,Adgra2,Adgre5,Adgrf5,Adgrg1,Adgrl2,Adgrl3,Adipoq,Adm,Adnp2,Aff1,Ago1,Ago2,Ahi1,Ahr,Aifm1,Aimp1,Ajuba,Akirin2,Akt3,Aldh1a3,Aldoa,Amotl1,Ank2,Ankrd27,Ankrd54,Ano6,Antxr1,Anxa1,Anxa2,Ap3b1,Apaf1,Apbb1,Apbb2,Apc,App,Aqp1,Arhgap35,Arhgap5,Arhgef2,Arid5a,Arnt,Arntl2,Arpc2,Arrb1,Arrb2,Asap1,Ash1l,Aspm,Asxl2,Atad1,Atad5,Atf6,Atg14,Atg7,Atm,Atmin…
GO:0048518	positive regulation of biological process	0.00135	0.0411	1259	3594	Common	Aamdc,Abca1,Abhd17b,Abhd5,Abi3bp,Ablim1,Acacb,Ace,Acvr1,Acvr1b,Acvrl1,Adam17,Adam8,Adam9,Adar,Add1,Adgra2,Adgre5,Adgrf5,Adgrg1,Adgrl2,Adgrl3,Adipoq,Adm,Adnp2,Aff1,Ago1,Ago2,Ahi1,Ahr,Aifm1,Aimp1,Ajuba,Akirin2,Akt3,Aldh1a3,Aldoa,Amotl1,Ank2,Ank3,Ankrd27,Ankrd54,Ano6,Antxr1,Anxa1,Anxa2,Ap3b1,Apaf1,Apbb1,Apbb1ip,Apbb2,Apc,App,Aqp1,Arf6,Arhgap35,Arhgap5,Arhgef2,Arid5a,Arid5b,Arl6ip1,Arnt,Arntl2,Arpc2,…
GO:0034599	cellular response to oxidative stress	0.0014	0.0413	43	3594	Common	Adnp2,Adprhl2,Agap3,Atg7,Atp13a2,Atp7a,Cd36,Cpeb2,Cyp1b1,Epas1,Ezh2,Foxo1,Foxo3,Gpx1,Hif1a,Htra2,Impact,Kdm6b,Map3k5,Mapk8,Mpv17,Nfe2l2,Nr4a2,Oxr1,Park7,Parp1,Pink1,Pml,Prdx1,Prkra,Rad52,Rwdd1,Selenon,Sirt2,Sod1,Sod2,Src,Thbs1,Tnfaip3,Trp53inp1,Uaca,Zc3h12a,Zfp277
GO:0051169	nuclear transport	0.0014	0.0413	43	3594	Common	Agap3,Ahcyl1,Ankrd54,Axin1,Camk1,Cep57,Fbxo22,Gsk3b,Hspa9,Ing1,Ipo11,Ipo5,Ipo7,Ipo9,Kpna2,Kpna4,Kpna6,Kpnb1,Mlx,Mlxip,Mmp12,Mybbp1a,Nfkbia,Npm1,Nup155,Nup160,Nup214,Phax,Phip,Pik3r1,Pml,Poldip3,Ppp3ca,Ppp3r1,Prkag1,Rab18,Ran,Trp53,Tsc2,Txnip,Xpo1,Xpo5,Xpo7
GO:0006913	nucleocytoplasmic transport	0.0014	0.0413	43	3594	Common	Agap3,Ahcyl1,Ankrd54,Axin1,Camk1,Cep57,Fbxo22,Gsk3b,Hspa9,Ing1,Ipo11,Ipo5,Ipo7,Ipo9,Kpna2,Kpna4,Kpna6,Kpnb1,Mlx,Mlxip,Mmp12,Mybbp1a,Nfkbia,Npm1,Nup155,Nup160,Nup214,Phax,Phip,Pik3r1,Pml,Poldip3,Ppp3ca,Ppp3r1,Prkag1,Rab18,Ran,Trp53,Tsc2,Txnip,Xpo1,Xpo5,Xpo7
GO:0061384	heart trabecula morphogenesis	0.00141	0.0413	20	3594	Common	Adamts1,Adgrg6,Bmpr1a,Chd7,Dll4,Egln1,Eng,Med1,Naca,Nfatc1,Rbp4,Rbpj,S1pr1,Sos1,Srf,Tek,Tgfb2,Tgfbr1,Tgfbr3,Ube4b
GO:1903313	positive regulation of mRNA metabolic process	0.00141	0.0413	20	3594	Common	Ago2,Cnot6l,Cnot7,Hspa8,Mettl14,Mettl16,Mettl3,Pabpc1,Prpf19,Qk,Rc3h1,Rnf219,Snrnp70,Tra2a,Tra2b,Zc3h12a,Zfp36,Zfp36l1,Zfp36l2,Zfp64
GO:0032273	positive regulation of protein polymerization	0.00141	0.0413	20	3594	Common	Apc,Arpc2,Carmil1,Dlg1,Evl,Jmy,Map3k1,Mlst8,Mtor,Nckap1,Nckap1l,Nin,Pfn2,Prkce,Pycard,Rac1,Rictor,Togaram1,Washc1,Wasl
GO:0043038	amino acid activation	0.00142	0.0413	10	3594	Common	Aars,Aasdh,Eprs,Gars,Iars,Lars,Mars,Rars,Tars,Wars
GO:0033866	nucleoside bisphosphate biosynthetic process	0.00142	0.0413	10	3594	Common	Acacb,Acss1,Acss2,Coasy,Mpc1,Pank1,Pank2,Pank3,Papss1,Pdha1
GO:0034033	purine nucleoside bisphosphate biosynthetic process	0.00142	0.0413	10	3594	Common	Acacb,Acss1,Acss2,Coasy,Mpc1,Pank1,Pank2,Pank3,Papss1,Pdha1
GO:0034030	ribonucleoside bisphosphate biosynthetic process	0.00142	0.0413	10	3594	Common	Acacb,Acss1,Acss2,Coasy,Mpc1,Pank1,Pank2,Pank3,Papss1,Pdha1
GO:0030433	ubiquitin-dependent ERAD pathway	0.00142	0.0413	10	3594	Common	Ccdc47,Dnajb9,Dnajc10,Edem1,Edem3,Fbxo6,Nrros,Ube2g2,Ube2j1,Wfs1
GO:0072329	monocarboxylic acid catabolic process	0.00144	0.0413	22	3594	Common	Abcd1,Abhd16a,Acadl,Acadm,Acadvl,Acot7,Acox1,Acox3,Adipoq,Akr1a1,Ces1d,Eci1,Hadha,Hadhb,Hsd17b4,Lipe,Lpin1,Pex13,Pex5,Pex7,Phyh,Slc27a4
GO:0071560	cellular response to transforming growth factor beta stimulus	0.00144	0.0413	33	3594	Common	Acvr1,Acvrl1,Adam9,Bmpr1b,Cav1,Dab2,Dusp22,Fut8,Gcnt2,Hipk2,Hyal2,Itgb5,Ltbp1,Ltbp3,Map3k1,Map3k7,Pml,Ppm1a,Ptk2,Pxn,Runx1,Serpine1,Smad2,Smad4,Smad5,Smad7,Tab1,Tgfb1,Tgfbr1,Tgfbr2,Tgfbr3,Usp9x,Zyx
GO:0032271	regulation of protein polymerization	0.00144	0.0413	33	3594	Common	Apc,Arpc2,Bbs4,Capza1,Capzb,Carmil1,Coro1a,Dlg1,Dyrk1a,Eps8,Evl,Gsn,Jmy,Map3k1,Mlst8,Mtor,Nckap1,Nckap1l,Nin,Pfn2,Prkcd,Prkce,Pycard,Rac1,Rictor,Slain2,Stmn1,Togaram1,Twf1,Twf2,Vdac2,Washc1,Wasl
GO:0071559	response to transforming growth factor beta	0.00144	0.0413	33	3594	Common	Acvr1,Acvrl1,Adam9,Bmpr1b,Cav1,Dab2,Dusp22,Fut8,Gcnt2,Hipk2,Hyal2,Itgb5,Ltbp1,Ltbp3,Map3k1,Map3k7,Pml,Ppm1a,Ptk2,Pxn,Runx1,Serpine1,Smad2,Smad4,Smad5,Smad7,Tab1,Tgfb1,Tgfbr1,Tgfbr2,Tgfbr3,Usp9x,Zyx
GO:0002478	antigen processing and presentation of exogenous peptide antigen	0.00144	0.0413	13	3594	Common	B2m,Cd74,Fcgr1,Fcgr2b,H2-Aa,H2-Ab1,H2-DMa,H2-DMb1,H2-Eb1,Tap2,Tapbp,Traf6,Unc93b1
GO:0061014	positive regulation of mRNA catabolic process	0.00144	0.0413	13	3594	Common	Ago2,Cnot6l,Cnot7,Mettl14,Mettl16,Mettl3,Pabpc1,Qk,Rc3h1,Zc3h12a,Zfp36,Zfp36l1,Zfp36l2
GO:0030834	regulation of actin filament depolymerization	0.00144	0.0413	13	3594	Common	Capza1,Capzb,Carmil1,Cfl1,Dstn,Eps8,Gsn,Plek,Plekhh2,Specc1l,Swap70,Twf1,Twf2
GO:0007015	actin filament organization	0.00148	0.0424	46	3594	Common	Actn1,Aif1,Baiap2,Casp4,Cdc42,Cfl1,Cfl2,Coro1a,Coro7,Dbn1,Diaph1,Dstn,Enah,Eps8,Evl,Fat1,Fscn1,Gas7,Gsn,Itgb5,Jmy,Lcp1,Marcks,Mical1,Mical2,Msrb1,Mtss1,Nck1,Nck2,Pdlim3,Phactr1,Prkci,Rac1,Rhoa,Rufy3,Shroom4,Sirpa,Sorbs1,Srf,Swap70,Trf,Triobp,Was,Washc1,Wasl,Wdr1
GO:0016050	vesicle organization	0.00148	0.0424	46	3594	Common	Agfg1,Als2,Aqp1,Bloc1s6,C2cd5,Cadps,Clcn3,Creb1,Dlg4,Dysf,Lamtor1,Lyst,Myo7a,Nbeal2,Nectin2,P2rx7,Picalm,Rab34,Rab5b,Rab5c,Rfx2,Samd9l,Sec23ip,Serpine2,Snapin,Snx19,Spg11,Srgn,Srpx,Stx3,Stx4a,Stx6,Stxbp1,Tbc1d20,Tbpl1,Tmem127,Tmf1,Usp8,Uvrag,Vamp3,Vps18,Vps33b,Vps4a,Vps4b,Washc1,Zfp385a
GO:0031325	positive regulation of cellular metabolic process	0.00151	0.0429	642	3594	Common	Aamdc,Abhd5,Ablim1,Ace,Acvr1,Acvrl1,Adam8,Adam9,Adgrf5,Adipoq,Aff1,Ago1,Ago2,Ahi1,Ahr,Ajuba,Akirin2,Antxr1,Anxa2,Apaf1,Apbb1,App,Arid5a,Arnt,Arntl2,Arrb1,Arrb2,Ash1l,Asxl2,Atad1,Atad5,Atf6,Atg14,Atg7,Atm,Atmin,Atp6ap1,Atr,Atrx,Atxn1,Atxn7,Axin1,Bach1,Bad,Bag1,Bak1,Banp,Bax,Bcar3,Bcl10,Bcl3,Bdnf,Bid,Bmp3,Bmp4,Bmp6,Bmpr1a,Bmpr2,Bnip2,Bok,Braf,Btbd10,Btrc,C1qtnf1,C1qtnf2,C3,Cab39,Casp8,Casp8ap2,Casp…
GO:0003205	cardiac chamber development	0.00155	0.0437	84	3594	Common	2410089E03Rik,Acvr1,Adamts1,Adamts6,Adgrg6,Ahr,Ap2b1,Arid1a,Bmp4,Bmpr1a,Bmpr2,Chd7,Cntrl,Ctnnb1,Cxcr4,Cyr61,Dctn5,Dhrs3,Dll4,Dnm2,Egln1,Eng,Fgfr2,Fgfrl1,Fuz,Gja5,Gsk3a,Hand2,Hectd1,Heg1,Heyl,Hif1a,Id2,Ift88,Jag1,Lmo4,Lrp1,Ltbp1,Luzp1,Maml1,Matr3,Med1,Mef2c,Myh10,Myocd,Naca,Ndst1,Nfatc1,Nprl3,Nrp1,Nsd2,Parva,Pcsk5,Plxnd1,Ptcd2,Ptk7,Rbm15,Rbp4,Rbpj,Robo1,Ryr2,Sav1,Sema3c,Smad4,Smad6,Smad7,Smarca4,S…
GO:0030335	positive regulation of cell migration	0.00155	0.0437	84	3594	Common	Adam8,Adgra2,Aldoa,Amotl1,Ano6,Apc,Aqp1,Arhgap5,Arhgef2,Atp8a1,Bcas3,Bmp4,C3ar1,C5ar1,Carmil1,Cbll1,Ccl2,Cd74,Cd99l2,Cib1,Coro1a,Csf1r,Ctsh,Cxcl12,Cyr61,Dab2,Dab2ip,Ddr2,Dock8,Elp3,Elp5,F2r,Fgr,Gab1,Gab2,Hif1a,Ikbkap,Il1r1,Itgav,Itgb3,Jun,Kdr,Kitl,Lgals9,Lyn,Mapk14,Mapk3,Med23,Mmp14,Myo1f,Nckap1l,Nipbl,Nrp1,Pdgfb,Pdgfrb,Plaa,Plk2,Plvap,Prkce,Ptk2b,Ptp4a1,Ptprj,Pycard,Rac1,Rac2,Rapgef2,Reln,Sdcbp,…
GO:0009058	biosynthetic process	0.00155	0.0437	339	3594	Common	Aars,Aasdh,Abca1,Acaca,Acacb,Acadm,Acan,Acss1,Acss2,Adcy3,Adcy4,Adcy5,Adcy6,Adcy7,Adcy9,Adk,Adss,Aff1,Agk,Agpat1,Ahr,Ajuba,Akr1a1,Aldh18a1,Aldh1a1,Aldh1a3,Alox5ap,Amd1,Ampd2,Atad5,Atf3,Atg16l1,Atg5,Atp7a,Atrx,B3galnt1,B3gnt5,B4galt1,B4gat1,Brca2,C1galt1c1,Calcoco1,Cavin1,Cdkal1,Cept1,Cers2,Cers4,Cers5,Chpt1,Chst3,Coasy,Col4a2,Coq9,Cpox,Crtc2,Csad,Cyp1b1,Cyp51,Cytl1,Daglb,Ddx17,Ddx5,Degs1,Dgat1,Dg…
GO:0016567	protein ubiquitination	0.00157	0.0443	61	3594	Common	Arrdc4,Asb2,Axin1,Bmi1,Btrc,Chfr,Fbxl3,Fbxo22,Fbxo25,Fbxw11,Fem1b,G2e3,Hdac6,Hectd1,Herc4,Itch,Jade2,Klhl2,Ltn1,March1,March8,Mgrn1,Nedd4,Pcgf3,Pcgf5,Pdzrn3,Peli1,Pja1,Rlim,Rnf111,Rnf115,Rnf13,Rnf149,Rnf2,Rnf20,Rnf220,Rnf25,Rnf31,Rnf41,Rnf6,Smurf1,Suz12,Taz,Traf6,Trim24,Trim3,Trim32,Trim37,Uba6,Ube2a,Ube2g1,Ube2w,Ube2z,Ube3a,Ube4a,Ube4b,Ubr2,Wwp1,Wwp2,Wwtr1,Znrf1
GO:0003279	cardiac septum development	0.00159	0.0446	58	3594	Common	2410089E03Rik,Acvr1,Adamts6,Ap2b1,Bmp4,Bmpr1a,Bmpr2,Chd7,Cntrl,Cxcr4,Cyr61,Dctn5,Dhrs3,Dnm2,Egln1,Fgfr2,Fgfrl1,Fuz,Gja5,Hectd1,Heg1,Id2,Ift88,Jag1,Lmo4,Lrp1,Ltbp1,Luzp1,Maml1,Matr3,Myh10,Ndst1,Nfatc1,Nprl3,Nrp1,Nsd2,Parva,Pcsk5,Plxnd1,Ptk7,Rbm15,Robo1,Sav1,Sema3c,Smad4,Smad6,Smad7,Smarca4,Snx17,Tab1,Tbx2,Tgfb2,Tgfbr1,Tgfbr2,Tgfbr3,Trip11,Wnt5a,Zbtb14
GO:1902115	regulation of organelle assembly	0.00159	0.0446	31	3594	Common	Akap13,Arhgap35,Arhgef2,Asap1,Atg3,Atg5,Atmin,Bbs4,Becn1,Cdk5rap2,Cep120,Cep97,Cyld,Dynll1,Ehmt2,Fuz,Hdac2,Htt,Ift20,Ift88,Mapk8,Mapk9,Mef2c,Msn,Mtm1,Pan3,Sh3glb1,Smad4,Src,Syne1,Syne2
GO:0045184	establishment of protein localization	0.00163	0.0454	157	3594	Common	Agap3,Ahcyl1,Ap1b1,Ap1g1,Ap1m1,Ap2a1,Ap2m1,Ap3b1,Ap4e1,Ap4m1,Ap4s1,Arf1,Arf5,Arf6,Arl6ip1,Arrdc4,Bax,Bcr,Bid,Bloc1s6,Brca2,Cacna1c,Cd36,Cd74,Cdk5,Cenpe,Cep290,Cep57,Clip1,Coro1c,Cttn,Cyb5r4,Derl2,Dzip1,Erbin,Foxp1,Gnptab,Gpam,Gsk3b,H2-DMa,Hps1,Hspa9,Htt,Ift122,Ift20,Ikzf1,Il1rap,Il1rn,Ing1,Ipo11,Ipo5,Ipo7,Ipo9,Itga8,Itgav,Kif13a,Kpna2,Kpna4,Kpna6,Kpnb1,Lamp2,Lcp2,Lyst,M6pr,Mcoln2,Mlph,Mmp12,Mon1a…
GO:0051272	positive regulation of cellular component movement	0.00167	0.0463	92	3594	Common	Adam17,Adam8,Adgra2,Aldoa,Amotl1,Ano6,Apc,Aqp1,Arhgap5,Arhgef2,Atp8a1,Bcas3,Bcl6,Bmp4,Bmpr2,C3ar1,C5ar1,Carmil1,Cavin1,Cbll1,Ccl2,Cd74,Cd99l2,Cib1,Coro1a,Csf1r,Ctsh,Cxcl12,Cyr61,Dab2,Dab2ip,Ddr2,Dock8,Elp3,Elp5,F2r,Fgr,Gab1,Gab2,Hif1a,Ikbkap,Il1r1,Itgav,Itgb3,Jun,Kdr,Kitl,Lgals9,Lyn,Mapk14,Mapk3,Med23,Megf8,Mmp14,Myo1f,Nckap1l,Nipbl,Nrp1,Pdgfb,Pdgfrb,Plaa,Plk2,Plvap,Prkce,Ptk2b,Ptp4a1,Ptprj,Pycar…
GO:2000113	negative regulation of cellular macromolecule biosynthetic process	0.00167	0.0463	301	3594	Common	Aatf,Adipoq,Aebp2,Ahr,Ajuba,Arid1a,Asxl2,Atf3,Atf7ip,Atoh8,Atrx,Axin1,Bach1,Baz2a,Bcl6,Bcor,Bhlhe40,Bmi1,Bmp4,Bmp6,Brca2,Cav1,Cbx1,Cbx3,Cbx4,Cbx5,Cc2d1b,Ccnd3,Cd36,Cdc73,Cdk6,Cebpb,Cebpd,Chd8,Cic,Ciita,Cipc,Clock,Cnot6l,Cops2,Cpeb1,Cpeb2,Crem,Cry2,Ctbp2,Ctcf,Ctnnb1,Ctr9,Cul3,Cux1,Daxx,Ddx20,Dicer1,Dll4,Dmap1,Dnajc2,Dnmt1,Dnmt3a,Drap1,Ednrb,Efna1,Egr1,Ehmt1,Ehmt2,Eif2ak1,Eif2ak3,Eif2ak4,Eif2s1,Eif…
GO:0007265	Ras protein signal transduction	0.00176	0.0486	29	3594	Common	Aif1,Baiap2,Cdc42,Cdc42ep1,Dbnl,Dok3,Eps8,Gna12,Gna13,Grb2,Hacd3,Kalrn,Ksr1,Myo9b,Nf1,Nisch,Nras,Pecam1,Phactr4,Ralgapa2,Ralgapb,Rap2b,Rap2c,Rhoa,Rhoj,Rhou,Rras2,Ulk1,Wasf2
GO:1902275	regulation of chromatin organization	0.00178	0.0491	47	3594	Common	Arid5a,Asxl2,Atg5,Atg7,Ctcf,Ctnnb1,Ctr9,Eed,Flcn,Fmr1,Gata2,Jarid2,Kdm1a,Kdm2a,Kdm3a,Kdm4a,Kdm4c,Kdm5a,Kmt2a,Kmt2b,L3mbtl2,Lpin1,Lrrk2,Mecp2,Mki67,Mllt6,Mtf2,Myocd,Ncor1,Paxbp1,Paxip1,Pink1,Rif1,Rnf20,Rnf40,Rtf1,Setd1a,Setd5,Setd7,Sirt1,Smad4,Supt6,Tgfb1,Trp53,Ube2b,Zfp335,Znhit1
GO:0040007	growth	0.00179	0.0492	168	3594	Common	3110043O21Rik,Adarb1,Add1,Adm,Ahr,Alkbh1,Ankrd11,Anxa1,Arid2,Arid5b,Aspm,Atm,Atrx,Bcl2l1,Bdnf,Bmp4,Bmpr1a,Bmpr1b,Bnc2,Brca2,Brd4,Cadm1,Ccm2,Cdc42,Cflar,Clic4,Col27a1,Csf1,Ctc1,Ctnnb1,Ctr9,Cyfip1,Cyfip2,Ddr1,Ddr2,Dicer1,Ehmt2,Eif2ak4,Eif4h,Ercc1,Ercc5,Esr1,Ezh2,Fgf1,Fgfr2,Foxo3,Foxp2,Fubp1,Fzd7,Gas1,Gigyf2,Gja1,Gli3,Gpx1,H3f3a,Hdac6,Icmt,Ifrd1,Igf1,Impact,Ints1,Itgb1,Kat2a,Kdm1a,Kdm2a,Kdm5b,Kdm6a,…
GO:0043409	negative regulation of MAPK cascade	0.00183	0.0502	39	3594	Common	Adipoq,Aida,Ankrd26,Apc,Ash1l,Atf3,Cav1,Cnksr3,Dact1,Dmd,Dusp16,Efna1,Flcn,Hipk3,Igf1r,Irak3,Itch,Lemd2,Lyn,Mapk7,Ndrg2,Nf1,Nf2,P2rx7,Prkca,Ptpn2,Ptpn22,Ptpn6,Ptprj,Rgs2,Rnf149,Smad4,Sorl1,Spred1,Spred2,Spred3,Spry2,Tlr4,Vrk3
GO:0002237	response to molecule of bacterial origin	0.00188	0.051	79	3594	Common	Abca1,Abr,Adh5,Akap8,Akirin2,Ankrd1,Arid5a,B2m,Bcr,C5ar1,Casp1,Ccl2,Cd14,Cd180,Cd36,Cd86,Cdc73,Cdk4,Cebpb,Ctr9,Cxcl16,Dab2ip,F2r,Fcgr2b,Hmgb2,Hsf1,Ifnar1,Irak1,Irak2,Irak3,Irf3,Irf8,Itgav,Jak2,Kcnj8,Lgals9,Lias,Litaf,Lyn,Mapk1,Mapk14,Mapk3,Mapkapk2,Mapkapk3,Mef2c,Mrc1,Myd88,Nfkbia,Nos2,Nos3,Nr1h3,P2rx7,Pabpn1,Paf1,Pdcd4,Pde4b,Pde4d,Peli1,Plcg2,Prdx3,Prkce,Ptafr,Ptger4,Ptgfr,Rara,Ripk2,Rpl13a,Rps6…
GO:0006403	RNA localization	0.00192	0.051	15	3594	Common	Casc3,Fmr1,Kif5c,Npm1,Nup155,Nup160,Nup214,Phax,Poldip3,Rftn2,Sidt2,Stau1,Tgfbr2,Yy1,Zfp385a
GO:0008154	actin polymerization or depolymerization	0.00192	0.051	15	3594	Common	Cfl1,Cfl2,Diaph1,Dstn,Enah,Evl,Gas7,Gsn,Mical1,Mical2,Msrb1,Mtss1,Rac1,Was,Wdr1
GO:0051642	centrosome localization	0.00192	0.051	15	3594	Common	Aspm,Ccdc141,Cep83,Dync1li2,Fhod1,Ift20,Ndel1,Nin,Nubp1,Pard3,Plxna2,Sun1,Sun2,Syne1,Syne2
GO:0010324	membrane invagination	0.00192	0.051	15	3594	Common	Abca1,Aif1,Becn1,C3,Clcn3,Fcgr1,Fcgr2b,Fcho2,Gsn,Itgam,Itgb2,Mfge8,Myh9,Rac1,Sirpa
GO:0061842	microtubule organizing center localization	0.00192	0.051	15	3594	Common	Aspm,Ccdc141,Cep83,Dync1li2,Fhod1,Ift20,Ndel1,Nin,Nubp1,Pard3,Plxna2,Sun1,Sun2,Syne1,Syne2
GO:0031397	negative regulation of protein ubiquitination	0.00192	0.051	15	3594	Common	Atg5,Cav1,Cdk5,Fyn,Gclc,N4bp1,Nxn,Ogt,Park7,Per2,Plaa,Prkce,Psen1,Psen2,Tspo
GO:0032204	regulation of telomere maintenance	0.00192	0.051	15	3594	Common	Atm,Atr,Atrx,Ctnnb1,Dkc1,Ercc1,Hnrnpd,Nabp2,Parp1,Slx4,Terf2,Tinf2,Xrcc1,Xrcc4,Ylpm1
GO:0043330	response to exogenous dsRNA	0.00192	0.051	15	3594	Common	Ddx1,Ddx21,Ddx58,Dhx36,Irak3,Irf3,Kcnj8,Mapk1,Mapk3,Nfkbia,Rftn2,Ripk2,Stat1,Tlr3,Zc3hav1
GO:0016032	viral process	0.00192	0.051	15	3594	Common	Atg16l1,Atg16l2,Atg5,Atg7,Bad,Banf1,Ctsb,Eif2ak4,Hcfc1,Npc1,Pcsk5,Tsg101,Uvrag,Vps16,Vps18
GO:0044419	interspecies interaction between organisms	0.00192	0.051	27	3594	Common	Aqp1,Araf,Atg16l1,Atg16l2,Atg5,Atg7,Bad,Banf1,Ctsb,Eif2ak4,Gbp2b,Gbp3,Gsdmd,Gucy1a1,Hcfc1,Hspa8,Irgm1,Mecp2,Npc1,Pcsk5,Stom,Tcp1,Tlr2,Tsg101,Uvrag,Vps16,Vps18
GO:0051252	regulation of RNA metabolic process	0.00205	0.0541	679	3594	Common	Aamdc,Ablim1,Acvr1,Acvr2a,Acvrl1,Adam8,Adipoq,Aebp1,Aebp2,Aff1,Ago1,Ago2,Ahctf1,Ahcyl1,Ahi1,Ahnak,Ahr,Ajuba,Akirin2,Ankrd1,Apbb1,Apbb2,App,Arid1a,Arid5b,Arnt,Arntl2,Ash1l,Asxl2,Atf3,Atf6,Atf7ip,Atmin,Atoh8,Atrx,Atxn1,Atxn7,Axin1,Bach1,Bag1,Banp,Baz2a,Bcl10,Bcl3,Bcl6,Bcor,Bhlhe40,Bmi1,Bmp3,Bmp4,Bmp6,Bmper,Bmpr1a,Bmpr1b,Bmpr2,Brf1,Brwd1,Btrc,Carm1,Cat,Cav1,Cbx1,Cbx3,Cbx4,Cbx5,Cc2d1b,Ccnd3,Cd36,Cd84…
GO:0031056	regulation of histone modification	0.00206	0.0541	45	3594	Common	Arid5a,Asxl2,Atg5,Atg7,Ctcf,Ctnnb1,Ctr9,Eed,Flcn,Fmr1,Gata2,Jarid2,Kdm1a,Kdm2a,Kdm3a,Kdm4a,Kdm4c,Kdm5a,Kmt2a,Kmt2b,L3mbtl2,Lpin1,Lrrk2,Mecp2,Mllt6,Mtf2,Myocd,Ncor1,Paxbp1,Paxip1,Pink1,Rif1,Rnf20,Rnf40,Rtf1,Setd5,Setd7,Sirt1,Smad4,Supt6,Tgfb1,Trp53,Ube2b,Zfp335,Znhit1
GO:2001242	regulation of intrinsic apoptotic signaling pathway	0.00206	0.0541	45	3594	Common	Bad,Bax,Bid,Bok,Cd44,Cd74,Creb3l1,Ei24,Erp29,Fbxw7,Flcn,G2e3,Gpx1,Grina,Herpud1,Hnrnpk,Hspb1,Hsph1,Hyou1,Ivns1abp,Mapk8ip1,Mcl1,Opa1,Park7,Parl,Pgap2,Pink1,Prkra,Ptgs2,Ptpn1,Ptpn2,Rpl11,Rpl26,Rrm2b,Rrn3,Serinc3,Sh3glb1,Sirt1,Skil,Steap3,Syvn1,Trp53,Usp47,Vdac2,Wfs1
GO:0010631	epithelial cell migration	0.00207	0.0542	25	3594	Common	Adgra2,Clec14a,Cyp1b1,Gpx1,Hmgb1,Itgav,Itgb1,Kdr,Lemd3,Mmrn2,Nrp1,Paxip1,Pecam1,Plekhg5,Plxnd1,Ppard,Pten,Ptk2,Ptpn11,Rab13,Scarb1,Srf,Tgfbr1,Vegfa,Zeb2
GO:0018022	peptidyl-lysine methylation	0.00207	0.0542	25	3594	Common	Arid4a,Ash1l,Baz2a,Ctr9,Ehmt1,Ehmt2,Ezh2,Hdac2,Kdm3a,Kmt2a,Kmt2b,Kmt2d,Kmt5b,Ncoa6,Nsd2,Pwp1,Rbbp5,Rtf1,Setd1a,Setd2,Setd7,Setdb1,Smyd2,Tet2,Wdr82
GO:1901576	organic substance biosynthetic process	0.0021	0.0547	327	3594	Common	Aars,Aasdh,Abca1,Acaca,Acacb,Acadm,Acan,Acss1,Acss2,Adcy3,Adcy4,Adcy5,Adcy6,Adcy7,Adcy9,Adk,Adss,Aff1,Agk,Agpat1,Ahr,Ajuba,Akr1a1,Aldh18a1,Aldh1a1,Aldh1a3,Alox5ap,Amd1,Ampd2,Atad5,Atf3,Atg16l1,Atg5,Atp7a,Atrx,B3galnt1,B3gnt5,B4galt1,B4gat1,Brca2,C1galt1c1,Calcoco1,Cavin1,Cdkal1,Cept1,Cers2,Cers4,Cers5,Chpt1,Chst3,Coasy,Col4a2,Coq9,Cpox,Crtc2,Csad,Cyp51,Cytl1,Ddx17,Ddx5,Degs1,Dgat1,Dgat2,Dhcr24,Dh…
GO:0007160	cell-matrix adhesion	0.00211	0.0548	32	3594	Common	Adam8,Adamts9,Ajuba,Cdk5,Col5a3,Ctgf,Ctnnb1,Ddr1,Dlc1,Fermt2,Fn1,Itga4,Itga6,Itgav,Itgb1,Jam3,Lims1,Mkln1,Nid1,Nid2,Npnt,Pecam1,Pxn,Rhoa,Sirpa,Sorbs1,Srf,Tek,Tnn,Tnxb,Trpm7,Zyx
GO:0006139	nucleobase-containing compound metabolic process	0.00215	0.0558	322	3594	Common	Aars,Acaca,Acacb,Acot9,Acss1,Acss2,Adar,Adarb1,Adcy3,Adcy4,Adcy5,Adcy6,Adcy7,Adcy9,Adk,Adss,Aff1,Ago1,Ago2,Ago4,Ahcyl1,Ahr,Ampd2,Apbb1,App,Atad5,Atm,Atp7a,Atr,Atrx,Auh,Axin1,Bad,Banf1,Baz2a,Bid,Bmi1,Brca2,Bysl,Calcoco1,Cavin1,Cdk13,Cdkal1,Cebpg,Celf2,Cep63,Ces1d,Cnot6l,Cnot7,Coasy,Col4a2,Coq9,Cpsf3,Crot,Ctc1,Ctcf,Dcaf1,Dclre1a,Dcp2,Ddx17,Ddx5,Dgat1,Dgat2,Dguok,Dicer1,Dis3l2,Dkc1,Dld,Dnaja3,Dnajb1…
GO:0023051	regulation of signaling	0.00216	0.0558	636	3594	Common	3110043O21Rik,Acvr1,Acvr1b,Acvr2a,Acvrl1,Adam17,Adam8,Adar,Adgra2,Adgrg1,Adipoq,Ago1,Aida,Aimp1,Ajuba,Akap13,Akt3,Als2,Ank2,Ankrd26,Ankrd54,Anks1,Anxa2,Apc,App,Arap3,Arhgap24,Arhgap35,Arhgap42,Arhgef2,Arrb1,Arrb2,Arrdc3,Ash1l,Aspn,Atad1,Atf3,Atg7,Atm,Atp2a2,Atp6ap1,Atp6ap2,Atxn1,Atxn7,Axin1,Axl,Bace1,Bad,Baiap2,Bax,Bcl10,Bcl6,Bdnf,Bicd1,Bid,Bmp4,Bmp6,Bmper,Bnip2,Bok,Braf,Btrc,C1qtnf1,C1qtnf2,C2cd…
GO:0030838	positive regulation of actin filament polymerization	0.00219	0.0563	17	3594	Common	Arpc2,Carmil1,Dlg1,Evl,Jmy,Map3k1,Mlst8,Mtor,Nckap1,Nckap1l,Pfn2,Prkce,Pycard,Rac1,Rictor,Washc1,Wasl
GO:0030199	collagen fibril organization	0.0022	0.0563	23	3594	Common	Acan,Adamts2,Anxa2,Atp7a,Col14a1,Col3a1,Col5a2,Cyp1b1,Ddr2,Dpt,Lox,Mia3,Mmp11,Nf1,P3h1,P3h4,P4ha1,Serpinh1,Sfrp2,Tgfbr1,Tnxb,Vipas39,Vps33b
GO:0030316	osteoclast differentiation	0.0022	0.0563	23	3594	Common	Adam8,Cd109,Cd300lf,Chuk,Csf1,Csf1r,Ctnnb1,Epha2,Fam20c,Farp2,Gab2,Gpr183,Lrrk1,Mapk14,Mitf,Ostm1,Snx10,Tfrc,Tgfb1,Tnfrsf11a,Traf6,Trf,Tyrobp
GO:2000045	regulation of G1/S transition of mitotic cell cycle	0.0022	0.0563	23	3594	Common	Anxa1,Bid,Ctdsp1,Ctdsp2,Cul4a,Cul4b,Ecd,Ezh2,Fbxo7,Gigyf2,Hacd1,Larp7,Mepce,Plcb1,Plk3,Plrg1,Pml,Prmt2,Rb1,Rdx,Rpl26,Senp2,Trp53
GO:1901800	positive regulation of proteasomal protein catabolic process	0.00228	0.0583	21	3594	Common	Atg7,Axin1,Chfr,Csnk1d,Csnk1e,Edem1,Edem2,Fbxo22,Fbxw7,Fmr1,Gba,Gclc,Il33,Lrrk2,Pias1,Psen1,Psen2,Sirt2,Trib1,Trib2,Xbp1
GO:0009893	positive regulation of metabolic process	0.00238	0.0605	698	3594	Common	Aamdc,Abhd5,Ablim1,Ace,Acvr1,Acvr1b,Acvrl1,Adam8,Adam9,Adar,Adgrf5,Adipoq,Aff1,Ago1,Ago2,Ahi1,Ahr,Ajuba,Akirin2,Ank2,Antxr1,Anxa2,Apaf1,Apbb1,Apc,App,Arid5a,Arnt,Arntl2,Arrb1,Arrb2,Ash1l,Asxl2,Atad1,Atad5,Atf3,Atf6,Atg14,Atg7,Atm,Atmin,Atp6ap1,Atr,Atrx,Atxn1,Atxn7,Axin1,Bach1,Bad,Bag1,Bak1,Banp,Bax,Bcar3,Bcl10,Bcl3,Bdnf,Bid,Bmp3,Bmp4,Bmp6,Bmpr1a,Bmpr2,Bnip2,Bok,Braf,Btbd10,Btrc,C1qtnf1,C1qtnf2,C3…
GO:0071216	cellular response to biotic stimulus	0.00247	0.0627	55	3594	Common	Abca1,Akap8,Ankrd1,Arid5a,Bcr,Ccdc47,Ccl2,Cd14,Cd180,Cd36,Cd86,Cdc73,Cdk4,Ctr9,Cxcl16,Dab2ip,Fbxo18,Fcgr2b,Gsk3b,Hspa5,Irak1,Irak2,Irf3,Irf8,Jak2,Litaf,Lyn,Mapk1,Mapk14,Mapk3,Mapk8,Mef2c,Mrc1,Myd88,Nfkbia,Nos2,Nos3,Nr1h3,Pabpn1,Paf1,Pdcd4,Pde4b,Pde4d,Ppp1r15b,Prkce,Rara,Ripk2,Stat1,Syk,Tlr2,Tlr4,Wnt5a,Xbp1,Zc3h12a,Zfp36
GO:0007010	cytoskeleton organization	0.0025	0.0634	190	3594	Common	Actn1,Actr2,Agfg1,Aif1,Arhgap10,Arhgap35,Arhgef2,Arhgef28,Arhgef5,Aspm,Atrx,Baiap2,Bbs2,Bbs4,Bcas3,Bccip,Bcl6,Bicd1,Bicd2,Bnip2,C2cd3,Cap1,Capn10,Casp4,Cavin3,Cc2d2a,Ccser2,Cdc42,Cdc42bpa,Cdk5rap2,Cep120,Cep63,Cfl1,Cfl2,Cflar,Cln3,Cln8,Coro1a,Coro1c,Coro7,Csrp1,Dbn1,Dctn6,Diaph1,Dicer1,Dlc1,Dock2,Dpysl2,Dst,Dstn,Dync1li2,Eml1,Enah,Epb41l3,Eps8,Evl,Eya1,Farp2,Fat1,Fgd1,Flii,Flnb,Fscn1,Gabarap,Gas7…
GO:0010823	negative regulation of mitochondrion organization	0.00259	0.0649	12	3594	Common	Bok,Clec16a,Flcn,Htra2,Ier3,Igf1,Lmna,Opa1,Parl,Tigar,Trp53,Tspo
GO:0032728	positive regulation of interferon-beta production	0.00259	0.0649	12	3594	Common	Ddx58,Hmgb1,Hmgb2,Ifnar1,Irf3,Irf7,Ptpn22,Tbk1,Tlr2,Tlr3,Tlr4,Zfp64
GO:0006476	protein deacetylation	0.00259	0.0649	12	3594	Common	Baz2a,Hdac1,Hdac2,Hdac3,Hdac6,Ndst1,Per1,Per2,Sfpq,Sirt1,Sirt2,Sirt3
GO:0048534	hematopoietic or lymphoid organ development	0.00259	0.0649	254	3594	Common	Abi1,Adam17,Adam8,Adar,Add1,Ahctf1,Ahr,Angpt2,Anxa1,Apc,Arid4a,Arl11,Atg5,Atm,Atp7a,Azi2,Bcl3,Bcl6,Bcr,Bmp4,Braf,Brca2,Btk,Casp8,Ccr1,Cd109,Cd1d1,Cd248,Cd300lf,Cd74,Cdk6,Cebpg,Chd2,Chuk,Ciapin1,Cib1,Clec4d,Csf1,Csf1r,Ctc1,Ctnnb1,Cul4a,Cyld,Dcaf1,Dhrs7b,Dicer1,Dll4,Dnaja3,Dnajb9,Dnase2a,Dock10,Dock11,Dock2,Ebp,Egr1,Eif2ak1,Ep300,Epas1,Epha2,Ephb3,Ercc1,Exoc6,Fam20c,Farp2,Fas,Fech,Fgfr2,Flcn,Fli1,F…
GO:2001234	negative regulation of apoptotic signaling pathway	0.00269	0.0667	62	3594	Common	Bid,Bmp4,Bok,Cd44,Cd74,Cdk11b,Creb3l1,Ctnna1,Ctnnb1,Cx3cl1,Cx3cr1,Dab2,Dapk1,Eya1,G2e3,Gas1,Gpx1,Grina,Hgf,Hmgb2,Hspb1,Hsph1,Hyou1,Ier3,Igbp1,Igf1,Ivns1abp,Lmna,Madd,Map3k7,Mapk8ip1,Meis3,Mkl1,Mnt,Nrp1,Opa1,Park7,Parl,Pea15a,Pgap2,Pink1,Psen2,Ptgs2,Ptpn1,Raf1,Rb1cc1,Ripk1,Rps6kb1,Rrm2b,Rrn3,Sfrp2,Sgk3,Sgms1,Sh3glb1,Sirt1,Stradb,Syvn1,Usp47,Vdac2,Vegfa,Wfs1,Zc3hc1
GO:0006164	purine nucleotide biosynthetic process	0.00271	0.0667	33	3594	Common	Acacb,Acss1,Acss2,Adcy3,Adcy4,Adcy5,Adcy6,Adcy7,Adcy9,Adk,Adss,Ampd2,Coasy,Galk1,Galt,Gpi1,Gucy1a1,Hk1,Impdh1,Impdh2,Mpc1,Mthfd1,Npr2,Pank1,Pank2,Pank3,Papss1,Pdha1,Pfkm,Pgk1,Pkm,Pnp,Stoml2
GO:0071498	cellular response to fluid shear stress	0.00274	0.0667	9	3594	Common	Hdac5,Mef2c,Mtss1,Pkd2,Ptgs2,Ptk2b,Socs5,Spp1,Src
GO:0071402	cellular response to lipoprotein particle stimulus	0.00274	0.0667	9	3594	Common	Cd36,Cd81,Cd9,Itgb1,Itgb2,Myd88,Npc1,Socs5,Syk
GO:0016575	histone deacetylation	0.00274	0.0667	9	3594	Common	Baz2a,Hdac1,Hdac2,Hdac3,Per1,Per2,Sfpq,Sirt1,Sirt2
GO:0030835	negative regulation of actin filament depolymerization	0.00274	0.0667	9	3594	Common	Capza1,Capzb,Eps8,Gsn,Plekhh2,Specc1l,Swap70,Twf1,Twf2
GO:1902893	regulation of pri-miRNA transcription by RNA polymerase II	0.00274	0.0667	9	3594	Common	Bmpr1a,Hdac2,Ppard,Smad1,Smad6,Spi1,Srf,Stat3,Yy1
GO:0055094	response to lipoprotein particle	0.00274	0.0667	9	3594	Common	Cd36,Cd81,Cd9,Itgb1,Itgb2,Myd88,Npc1,Socs5,Syk
GO:0043039	tRNA aminoacylation	0.00274	0.0667	9	3594	Common	Aars,Eprs,Gars,Iars,Lars,Mars,Rars,Tars,Wars
GO:0006418	tRNA aminoacylation for protein translation	0.00274	0.0667	9	3594	Common	Aars,Eprs,Gars,Iars,Lars,Mars,Rars,Tars,Wars
GO:0002682	regulation of immune system process	0.00281	0.0684	339	3594	Common	Abr,Ace,Adam17,Adam8,Adar,Adgrf5,Ankrd54,Ano6,Anxa1,Ap3b1,Apc,Arid5a,Arrb2,Asxl2,Atad5,Atg5,Atg7,Atp6ap1,Atxn1l,B2m,Bad,Bcl10,Bcl6,Bcr,Bloc1s6,Bmi1,Braf,Btk,C1qa,C3,C3ar1,C4b,C5ar1,Cacnb3,Cadm1,Casp3,Cblb,Ccl2,Ccr1,Cd14,Cd1d1,Cd200,Cd274,Cd276,Cd300lf,Cd36,Cd37,Cd44,Cd55,Cd59a,Cd74,Cd81,Cd83,Cd84,Cd86,Cd99l2,Cdk6,Cebpb,Cfh,Cib1,Clec4d,Clptm1,Cmtm3,Coro1a,Creb1,Csf1,Csk,Ctnnb1,Cuedc2,Cul4a,Cyld,De…
GO:0016071	mRNA metabolic process	0.00284	0.0688	44	3594	Common	Ago2,Ahcyl1,App,Auh,Cdk13,Cebpg,Celf2,Cnot6l,Cnot7,Cpsf3,Dcp2,Ddx17,Ddx5,Dnajb11,Gtpbp2,Hnrnpd,Khsrp,Lsm11,Mbnl1,Med1,Mettl14,Mettl16,Mettl3,Mlh1,Pabpn1,Pan3,Parn,Pcbp1,Plcb1,Pnpt1,Ptbp2,Rc3h1,Sf3b6,Sfswap,Sp1,Srf,Srpk2,Stat3,Tfip11,Zc3h12a,Zfp36,Zfp36l1,Zfp36l2,Zhx2
GO:0035264	multicellular organism growth	0.00288	0.0695	53	3594	Common	Adarb1,Add1,Ankrd11,Arid5b,Atm,Atrx,Ccm2,Cdc42,Clic4,Ctc1,Dicer1,Ercc1,Ercc5,Fgfr2,Gigyf2,H3f3a,Icmt,Igf1,Kat2a,Kdm2a,Kdm6a,Kmt2c,Mtor,Ncoa3,Ndufs6,Nek1,Notch2,Pcnt,Pde4d,Pkdcc,Plekha1,Ptpn11,Rbbp6,Rc3h2,Rmi1,Sik3,Slc12a2,Smo,Sos1,Stk40,Taf10,Tarbp2,Tbl1xr1,Tcf7l2,Tmed2,Tnks2,Tns2,Ttc8,Wdr48,Wdtc1,Wwtr1,Zfp36l1,Zfx
GO:0006974	cellular response to DNA damage stimulus	0.00288	0.0695	115	3594	Common	Apbb1,Atf2,Atm,Atr,Atrx,Bad,Bak1,Bax,Bccip,Bcl2l1,Bid,Brca2,Casp3,Casp9,Cdkn1a,Chd2,Ctc1,Dclre1a,Ei24,Ercc1,Ercc5,Fmr1,Fnip2,Foxo1,Foxo3,Foxo4,Fto,Gigyf2,Gtf2h5,Helb,Hmgb1,Hmgn1,Hspa1a,Hus1,Ier3,Lig1,Lig3,Mapk1,Mapk14,Mapk3,Marf1,Mbd4,Mcl1,Mcm9,Mif,Mlh1,Mlh3,Mre11a,Msh2,Msh3,Msh6,Mta1,Nabp2,Nbn,Nek1,Nfatc4,Nupr1,Parg,Parp1,Parp2,Paxip1,Pcna,Pgap2,Pik3r1,Plk3,Pml,Pms2,Pnp,Polb,Polh,Polk,Prkdc,Psen…
GO:0030833	regulation of actin filament polymerization	0.0029	0.0696	26	3594	Common	Arpc2,Bbs4,Capza1,Capzb,Carmil1,Coro1a,Dlg1,Eps8,Evl,Gsn,Jmy,Map3k1,Mlst8,Mtor,Nckap1,Nckap1l,Pfn2,Prkcd,Prkce,Pycard,Rac1,Rictor,Twf1,Twf2,Washc1,Wasl
GO:0061383	trabecula morphogenesis	0.0029	0.0696	26	3594	Common	Adamts1,Adgrg6,Bmpr1a,Chd7,Dll4,Egln1,Eng,Med1,Naca,Nfatc1,Plxnb1,Rbp4,Rbpj,Rhoa,S1pr1,Sema4d,Slc40a1,Sos1,Srf,Tek,Tgfb2,Tgfbr1,Tgfbr3,Thbs3,Ube4b,Vegfa
GO:0045087	innate immune response	0.00291	0.0696	66	3594	Common	Atg9a,Capg,Ccl2,Cdc42,Cebpg,Ciita,Clec4d,Clec5a,Dapk1,Ddx58,Eprs,Evl,Fbxo9,Flnb,Gbp2b,Gbp3,Gsn,H2-Aa,H2-Ab1,H2-Eb1,Ifih1,Ifitm3,Ifnar1,Ikbke,Ipo7,Irf1,Irgm1,Kif16b,Kif5b,Mrc1,Msrb1,Myd88,Myo18a,Myo1c,Nlrc5,Nos2,Oas2,Pml,Prdx1,Ptpn6,Rab12,Rab27a,Ripk2,Rnf19b,Rpl13a,Stat1,Stx4a,Stxbp1,Stxbp2,Stxbp3,Syk,Tlr13,Tlr2,Tlr3,Tlr4,Trim25,Trim27,Trim28,Trim8,Trp53,Vamp3,Vamp4,Vim,Vps26b,Was,Zyx
GO:0051173	positive regulation of nitrogen compound metabolic process	0.00292	0.0697	619	3594	Common	Aamdc,Ablim1,Ace,Acvr1,Acvrl1,Adam8,Adam9,Adipoq,Aff1,Ago1,Ago2,Ahi1,Ahr,Ajuba,Akirin2,Antxr1,Apaf1,Apbb1,Apc,App,Arid5a,Arnt,Arntl2,Arrb1,Arrb2,Ash1l,Asxl2,Atad5,Atf6,Atg14,Atg7,Atm,Atmin,Atp6ap1,Atr,Atrx,Atxn1,Atxn7,Axin1,Bach1,Bad,Bag1,Bak1,Banp,Bax,Bcar3,Bcl10,Bcl3,Bdnf,Bid,Bmp3,Bmp4,Bmp6,Bmpr1a,Bmpr2,Bnip2,Bok,Braf,Btrc,C1qtnf1,C1qtnf2,C3,Cab39,Casp8,Casp8ap2,Casp9,Cavin3,Cblb,Ccdc88a,Cd1d1,…
GO:0046777	protein autophosphorylation	0.00317	0.0753	39	3594	Common	Brd4,Camk2d,Camk2g,Clk1,Clk2,Clk3,Clk4,Csf1r,Ddr1,Ddr2,Dyrk1a,Egfr,Eif2ak3,Eif2ak4,Eif2s1,Ern1,Fyn,Igf1r,Insr,Irak1,Irak3,Jak2,Kdr,Lyn,Map3k12,Met,Nlk,Pdgfra,Pdgfrb,Prkca,Ptk2,Stk16,Syk,Trim24,Trim28,Trpm7,Ulk1,Vrk1,Vrk2
GO:0071230	cellular response to amino acid stimulus	0.00317	0.0753	24	3594	Common	Bcl2l1,Capn2,Cebpb,Col16a1,Col1a2,Col3a1,Col4a1,Col5a2,Col6a1,Cpeb1,Cpeb4,Dnmt1,Dnmt3a,Egfr,Ipo5,Mmp2,Ntrk2,Pdgfc,Pdgfd,Pdgfra,Sesn1,Sesn3,Xbp1,Zeb1
GO:0099024	plasma membrane invagination	0.00329	0.0781	14	3594	Common	Abca1,Aif1,Becn1,C3,Clcn3,Fcgr1,Fcgr2b,Gsn,Itgam,Itgb2,Mfge8,Myh9,Rac1,Sirpa
GO:0010646	regulation of cell communication	0.00335	0.079	629	3594	Common	3110043O21Rik,Acvr1,Acvr1b,Acvr2a,Acvrl1,Adam17,Adam8,Adar,Adgra2,Adgrg1,Adipoq,Ago1,Aida,Aimp1,Ajuba,Akap13,Akt3,Ank2,Ankrd26,Ankrd54,Anks1,Apc,App,Arap3,Arhgap24,Arhgap35,Arhgap42,Arhgef2,Arrb1,Arrb2,Arrdc3,Ash1l,Aspn,Atad1,Atf3,Atg7,Atm,Atp2a2,Atp6ap1,Atp6ap2,Atxn1,Atxn7,Axin1,Axl,Bace1,Bad,Baiap2,Bax,Bcl10,Bcl6,Bdnf,Bicd1,Bid,Bmp4,Bmp6,Bmper,Bnip2,Bok,Braf,Btrc,C1qtnf1,C1qtnf2,C2cd2l,C2cd3,Ca…
GO:0071222	cellular response to lipopolysaccharide	0.00335	0.079	45	3594	Common	Abca1,Akap8,Ankrd1,Arid5a,Bcr,Ccl2,Cd14,Cd180,Cd36,Cd86,Cdc73,Cdk4,Ctr9,Cxcl16,Dab2ip,Irak1,Irak2,Irf3,Irf8,Jak2,Litaf,Lyn,Mapk1,Mapk14,Mapk3,Mef2c,Mrc1,Myd88,Nfkbia,Nos2,Nos3,Nr1h3,Pabpn1,Paf1,Pdcd4,Pde4b,Pde4d,Prkce,Rara,Ripk2,Stat1,Tlr4,Xbp1,Zc3h12a,Zfp36
GO:0040029	regulation of gene expression, epigenetic	0.00341	0.0801	34	3594	Common	Adar,Ago2,Arid1a,Baz2a,Cdyl,Ctcf,Ctnnb1,Dicer1,Dnmt3a,Drosha,Eed,Eif1,Exosc10,Gsk3a,Gsk3b,Kdm1b,Kmt2d,Mecp2,Pcgf3,Pcgf5,Ppm1d,Prmt7,Rbm3,Rif1,Rlim,Slc50a1,Smarca4,Smarca5,Smchd1,Tdg,Ube2b,Ubr2,Ubtf,Zfp36
GO:0010508	positive regulation of autophagy	0.00341	0.0801	22	3594	Common	Cdc37,Clec16a,Eif2ak4,Gba,Hif1a,Hmox1,Irgm1,Lrrk2,Map3k7,Mfn2,Mul1,Nod1,Prkaa1,Rab12,Ripk2,Sh3glb1,Sirt1,Smurf1,Tbk1,Tlr2,Tsc2,Zc3h12a
GO:0000278	mitotic cell cycle	0.00342	0.0801	71	3594	Common	Akap8,Apc,Arhgef2,Azi2,Bccip,Bub3,Calm2,Camk2d,Camk2g,Cdk2,Cdk5rap2,Cdkn1b,Cenpe,Cfl1,Chfr,Cul3,Daxx,Dctn6,E2f4,Eml1,Eps8,Eya1,Foxo4,Gigyf2,Gpsm2,Hus1,Ier3,Itgb1,Kat14,Lats2,Map4,Map9,Mbd4,Mcph1,Mre11a,Myh10,Nasp,Nbn,Ncaph2,Ndel1,Nfatc1,Numa1,Pcnt,Plcb1,Plk2,Plk3,Pml,Ppm1d,Ppp2r1a,Ppp3ca,Ptpn11,Ptpn6,Rb1,Rbbp8,Rhou,Rnf2,Rpl24,Rpl26,Rps6,Sept7,Syf2,Tada2a,Tada3,Taf10,Tpx2,Trp53,Trrap,Tubg1,Uba3,Wa…
GO:0009719	response to endogenous stimulus	0.00344	0.0803	214	3594	Common	Acaca,Acvr1,Acvr2a,Acvrl1,Adam9,Adcy6,Adh1,Adipor2,Akap8,Anxa1,Apc,Atp1a2,Bbs2,Bbs4,Bcl2l1,Bmp4,Bmp6,Bmpr1a,Bmpr1b,Bmpr2,C2cd5,Calcoco1,Capn10,Capn2,Carm1,Casp9,Cav1,Cd36,Cd81,Cd9,Cdk4,Cebpb,Col16a1,Col1a2,Col3a1,Col4a1,Col5a2,Col6a1,Cpeb1,Cpeb4,Creb1,Ctgf,Dab2,Dennd4c,Dnaja1,Dnmt1,Dnmt3a,Dusp22,Ecsit,Egfr,Egr1,Ehmt2,Eif4e,Eif4ebp1,Eif4ebp2,Eif6,Epha3,Esr1,Ezh2,Fas,Fat4,Fbxo18,Fcgr2b,Fgfr1,Fgfr2,…
GO:0051129	negative regulation of cellular component organization	0.00345	0.0803	131	3594	Common	Ace,Adcy6,Antxr1,Apc,Arhgap24,Arhgef15,Arhgef2,Asap1,Atg3,Atg5,Atg7,Bbs4,Bcas3,Becn1,Bok,Capza1,Capzb,Carmil1,Cd300lf,Cdk5rap2,Cenpe,Cep97,Cflar,Clasp1,Clasp2,Clec16a,Coro1a,Dnajc15,Dyrk1a,Efna1,Ehmt2,Eml4,Epha3,Eps8,Fcgr2b,Flcn,Gba,Gsk3b,Gsn,H2-D1,Hdac2,Hdac6,Hdgfl3,Htra2,Ier3,Igf1,Impact,Inpp5f,Itgb1bp1,Jarid2,Kdm1a,Kdm3a,Kdm4a,Kdm4c,Kdm5a,L3mbtl2,Lgals3,Lmna,Lmo4,Lpar1,Lrig2,Lrp4,Mecp2,Mllt6,M…
GO:0009117	nucleotide metabolic process	0.00357	0.0826	75	3594	Common	Acaca,Acacb,Acot9,Acss1,Acss2,Adcy3,Adcy4,Adcy5,Adcy6,Adcy7,Adcy9,Adk,Adss,Ampd2,Atp7a,Bad,Bid,Ces1d,Coasy,Coq9,Crot,Dgat1,Dgat2,Dguok,Dld,Dtymk,Enpp1,G6pdx,Galk1,Galt,Gpam,Gpd1l,Gpi1,Gucy1a1,Guk1,H6pd,Hk1,Impdh1,Impdh2,Itpa,Ldha,Mecp2,Mlycd,Mocs1,Mpc1,Msh2,Mthfd1,Nampt,Ndufa10,Npr2,Nt5c,Nt5e,Nudt7,Nudt9,Pank1,Pank2,Pank3,Papss1,Pde4b,Pde4d,Pde5a,Pdha1,Pfkm,Pgk1,Pkm,Pnp,Rnaseh2b,Rrm1,Rrm2b,Scp2,S…
GO:0002520	immune system development	0.00358	0.0826	265	3594	Common	Abi1,Adam17,Adam8,Adar,Add1,Ahctf1,Ahr,Angpt2,Anxa1,Apc,Arid4a,Arl11,Atg5,Atm,Atp7a,Azi2,Bcl3,Bcl6,Bcr,Bmp4,Braf,Brca2,Btk,Casp8,Ccr1,Cd109,Cd1d1,Cd248,Cd300lf,Cd74,Cdk6,Cebpg,Chd2,Chuk,Ciapin1,Cib1,Clec4d,Csf1,Csf1r,Ctc1,Ctnnb1,Cul4a,Cyld,Dcaf1,Dhrs7b,Dicer1,Dll4,Dnaja3,Dnajb9,Dnase2a,Dock10,Dock11,Dock2,Ebp,Egr1,Eif2ak1,Ep300,Epas1,Epha2,Ephb3,Ercc1,Exoc6,Ezh2,Fam20c,Farp2,Fas,Fech,Fgfr2,Flcn,F…
GO:0097435	supramolecular fiber organization	0.00358	0.0826	90	3594	Common	Acan,Actn1,Adamts2,Agfg1,Aif1,Anxa2,Atp7a,Baiap2,Casp4,Cd36,Cdc42,Cep120,Cfl1,Cfl2,Cflar,Col14a1,Col3a1,Col5a2,Coro1a,Coro7,Cyp1b1,Dbn1,Ddr2,Diaph1,Dpt,Dst,Dstn,Enah,Eps8,Evl,Fat1,Fscn1,Gas7,Gsn,Hdgfl3,Ift172,Ift88,Itgb1,Itgb5,Jmy,Lcp1,Lox,Loxl3,Ltbp2,Marcks,Mef2a,Mfap5,Mia3,Mical1,Mical2,Mmp11,Msrb1,Mtss1,Myh10,Nck1,Nck2,Nde1,Nefl,Nf1,Nin,P3h1,P3h4,P4ha1,Pdlim3,Phactr1,Prkar1a,Prkci,Rac1,Rhoa,Ru…
GO:0060612	adipose tissue development	0.00361	0.0826	20	3594	Common	Ap1s2,Arid5b,Arrdc3,Bbs4,Cdk4,Csf1,Dgat2,Ebf2,Fto,Id2,Paxip1,Pik3ca,Ppard,Sh3pxd2b,Slc25a25,Spg20,Tbl1xr1,Ubb,Xbp1,Zfp516
GO:0034614	cellular response to reactive oxygen species	0.00361	0.0826	20	3594	Common	Adprhl2,Agap3,Atg7,Atp7a,Cyp1b1,Ezh2,Foxo1,Impact,Kdm6b,Mapk8,Mpv17,Park7,Parp1,Prdx1,Sod1,Sod2,Src,Thbs1,Tnfaip3,Zfp277
GO:0070646	protein modification by small protein removal	0.00361	0.0826	20	3594	Common	Abraxas2,Cyld,Eif3f,Otud4,Otud7b,Otulin,Senp1,Senp2,Stambp,Tnfaip3,Usp12,Usp16,Usp19,Usp21,Usp22,Usp30,Usp36,Usp46,Usp7,Usp8
GO:0040017	positive regulation of locomotion	0.00361	0.0826	94	3594	Common	Adam8,Adgra2,Aldoa,Amotl1,Ano6,Apc,Aqp1,Arhgap5,Arhgef2,Atp8a1,Bcas3,Bmp4,Bmpr2,C3ar1,C5ar1,Carmil1,Cavin1,Cbll1,Ccl2,Cd74,Cd99l2,Cib1,Coro1a,Csf1r,Ctsh,Cxcl12,Cyr61,Dab2,Dab2ip,Ddr2,Dock8,Elp3,Elp5,F2r,Fgr,Gab1,Gab2,Hif1a,Ikbkap,Il16,Il1r1,Itgav,Itgb3,Jun,Kdr,Kitl,Lgals9,Lyn,Mapk14,Mapk3,Med23,Megf8,Mmp14,Myo1f,Nckap1l,Nipbl,Nrp1,Pdgfb,Pdgfrb,Plaa,Plk2,Plvap,Prkca,Prkce,Ptk2b,Ptp4a1,Ptprj,Pycard…
GO:0031570	DNA integrity checkpoint	0.00363	0.0826	16	3594	Common	Atm,Atr,Foxo4,Gigyf2,Hus1,Ier3,Mapk14,Mbd4,Mre11a,Nbn,Pml,Ptpn11,Rpl26,Syf2,Tipin,Trp53
GO:1903321	negative regulation of protein modification by small protein conjugation or removal	0.00363	0.0826	16	3594	Common	Atg5,Cav1,Cdk5,Fyn,Gclc,Hmg20a,N4bp1,Nxn,Ogt,Park7,Per2,Plaa,Prkce,Psen1,Psen2,Tspo
GO:0016197	endosomal transport	0.0037	0.0838	18	3594	Common	Als2,Ap1s1,Cdc42,Chmp5,Dennd1a,Dennd1b,Erc1,Htt,Lamtor1,Rab13,Snx27,Vps26a,Vps26b,Vps35,Vps50,Was,Washc1,Washc4
GO:2001238	positive regulation of extrinsic apoptotic signaling pathway	0.0037	0.0838	18	3594	Common	Bax,Bcl10,Ctnna1,Fas,Hyal2,Itm2c,Nf1,Pdia3,Pea15a,Ppp2r1a,Psen2,Ptprc,Rbck1,Siglec1,Skil,Srpx,Tgfb2,Tnfsf10
GO:0072521	purine-containing compound metabolic process	0.00377	0.0852	65	3594	Common	Acaca,Acacb,Acot9,Acss1,Acss2,Adcy3,Adcy4,Adcy5,Adcy6,Adcy7,Adcy9,Adk,Adss,Ampd2,Atp7a,Bad,Bid,Ces1d,Coasy,Coq9,Crot,Dgat1,Dgat2,Dguok,Dld,Enpp1,Galk1,Galt,Gpam,Gpi1,Gucy1a1,Guk1,Hk1,Hprt,Impdh1,Impdh2,Itpa,Ldha,Mecp2,Mlycd,Mocs1,Mpc1,Msh2,Mthfd1,Ndufa10,Npr2,Nt5e,Nudt7,Nudt9,Pank1,Pank2,Pank3,Papss1,Pde4b,Pde4d,Pde5a,Pdha1,Pfkm,Pgk1,Pkm,Pnp,Scp2,Slc25a25,Stoml2,Vcp
GO:2001236	regulation of extrinsic apoptotic signaling pathway	0.00381	0.0859	40	3594	Common	Bax,Bcl10,Bmp4,Ctnna1,Cx3cl1,Cx3cr1,Dab2,Dapk1,Eya1,Fas,Fgfr1,Gas1,Hgf,Hmgb2,Hyal2,Itm2c,Lmna,Nf1,Nrp1,Pdia3,Pea15a,Ppp2r1a,Psen2,Ptprc,Raf1,Rb1cc1,Rbck1,Ripk1,Rps6kb1,Sfrp2,Sgk3,Sgms1,Siglec1,Skil,Srpx,Stradb,Tgfb2,Tnfsf10,Vegfa,Zc3hc1
GO:2000147	positive regulation of cell motility	0.00383	0.0861	87	3594	Common	Adam8,Adgra2,Aldoa,Amotl1,Ano6,Apc,Aqp1,Arhgap5,Arhgef2,Atp8a1,Bcas3,Bmp4,C3ar1,C5ar1,Carmil1,Cavin1,Cbll1,Ccl2,Cd74,Cd99l2,Cib1,Coro1a,Csf1r,Ctsh,Cxcl12,Cyr61,Dab2,Dab2ip,Ddr2,Dock8,Elp3,Elp5,F2r,Fgr,Gab1,Gab2,Hif1a,Ikbkap,Il1r1,Itgav,Itgb3,Jun,Kdr,Kitl,Lgals9,Lyn,Mapk14,Mapk3,Med23,Mmp14,Myo1f,Nckap1l,Nipbl,Nrp1,Pdgfb,Pdgfrb,Plaa,Plk2,Plvap,Prkce,Ptk2b,Ptp4a1,Ptprj,Pycard,Rac1,Rac2,Rapgef2,Reln…
GO:0043087	regulation of GTPase activity	0.00389	0.087	43	3594	Common	Ajuba,Als2,Arhgap1,Arhgap24,Arhgef5,Bbs4,Bcas3,Bcl6,Chn1,Coro1c,Dab2ip,Dennd1a,Dennd1b,Dock10,Dock11,Dock9,Dvl2,Erbb2,Kalrn,Lrch1,Mlst8,Mtor,Myo9b,Ndel1,Nf1,Ntrk2,Plxnb1,Pycard,Rab3gap1,Ralbp1,Rapgef2,Rcc2,Rgma,Rictor,Rrp1b,Sema4d,Sipa1l1,Spry2,Srgap2,Tbc1d15,Tiam1,Ttc8,Wnt5a
GO:0030100	regulation of endocytosis	0.00389	0.087	49	3594	Common	Ahi1,Ano6,Anxa2,Arfgap1,Arhgap21,Atad1,Atg3,Atg5,Atg7,C3,Cbll1,Ccl2,Cd14,Cd300lf,Cd36,Cd47,Dab2,Dnajc6,Dock2,Fcgr1,Fcgr2b,Fgr,Flot1,Hip1,Lgals3,Lman2,Mfge8,Mib1,Myo18a,Nckap1l,Ophn1,Pacsin2,Pacsin3,Pard3,Plcg2,Ppp3ca,Pycard,Rab5b,Rab5c,Rabgef1,Rufy1,Sirpa,Smap1,Syk,Syt11,Tlr2,Tsc2,Tsg101,Wnt5a
GO:0051145	smooth muscle cell differentiation	0.0039	0.087	27	3594	Common	Acvr1,Adm,Bmp4,Ctnnb1,Ednrb,Eng,Itga8,Mecp2,Mef2c,Mkl2,Myocd,Npnt,Ntf3,Pbrm1,Pdgfb,Pdgfrb,Ramp2,Sgcb,Smad6,Smarca2,Smarca4,Sox9,Srf,Tbx18,Tmem204,Tshz3,Vegfa
GO:2001235	positive regulation of apoptotic signaling pathway	0.00391	0.0873	46	3594	Common	Bad,Bax,Bcl10,Bid,Bok,Ctnna1,Daxx,Eef1e1,Ei24,Fam162a,Fas,Fbxw7,Flcn,Gsk3a,Gsk3b,Hyal2,Itm2c,Jak2,Maged1,Mcl1,Nf1,Nfatc4,Park7,Pdcd7,Pdia3,Pea15a,Pml,Ppp2r1a,Prkcd,Prkra,Psen2,Pten,Ptpn2,Ptprc,Rbck1,Rpl11,Rpl26,Serinc3,Sh3glb1,Siglec1,Sirt1,Skil,Srpx,Steap3,Tgfb2,Tnfsf10
GO:0072522	purine-containing compound biosynthetic process	0.00421	0.0936	35	3594	Common	Acacb,Acss1,Acss2,Adcy3,Adcy4,Adcy5,Adcy6,Adcy7,Adcy9,Adk,Adss,Ampd2,Coasy,Galk1,Galt,Gpi1,Gucy1a1,Hk1,Hprt,Impdh1,Impdh2,Mpc1,Mthfd1,Npr2,Nt5e,Pank1,Pank2,Pank3,Papss1,Pdha1,Pfkm,Pgk1,Pkm,Pnp,Stoml2
GO:0015833	peptide transport	0.00425	0.0943	149	3594	Common	Abca1,Agap3,Ahcyl1,Ap1b1,Ap1g1,Ap1m1,Ap2a1,Ap2m1,Ap3b1,Ap4e1,Ap4m1,Ap4s1,Aqp1,Arf1,Arf5,Arf6,Arl6ip1,Arrdc4,Bcr,Bid,Bloc1s6,Cacna1c,Cd36,Cd74,Cdk16,Cdk5,Cep290,Cep57,Clip1,Cttn,Cyb5r4,Derl2,Disp1,Erbin,Foxp1,Gnptab,Gpam,Gsk3b,H2-DMa,Hps1,Hspa9,Htt,Ift20,Il1rap,Il1rn,Ing1,Ipo11,Ipo5,Ipo7,Ipo9,Itgav,Kif13a,Kpna2,Kpna4,Kpna6,Kpnb1,Lamp2,Lcp2,Lyst,M6pr,Mcoln2,Mlph,Mmp12,Mon1a,Msr1,Myo1b,Myo5a,Myo7a,N…
GO:0044403	symbiont process	0.00435	0.096	25	3594	Common	Aqp1,Araf,Atg16l1,Atg16l2,Atg5,Atg7,Bad,Banf1,Ctsb,Eif2ak4,Gbp2b,Gbp3,Gucy1a1,Hcfc1,Hspa8,Irgm1,Npc1,Pcsk5,Stom,Tcp1,Tlr2,Tsg101,Uvrag,Vps16,Vps18
GO:0007179	transforming growth factor beta receptor signaling pathway	0.00435	0.096	25	3594	Common	Acvr1,Acvrl1,Adam9,Bmpr1b,Dusp22,Fut8,Gcnt2,Hipk2,Itgb5,Ltbp1,Ltbp3,Map3k1,Map3k7,Pml,Pxn,Smad2,Smad4,Smad5,Smad7,Tab1,Tgfb1,Tgfbr1,Tgfbr2,Tgfbr3,Zyx
GO:0061448	connective tissue development	0.00438	0.0964	70	3594	Common	Acan,Ap1s2,Arid5a,Arid5b,Arrdc3,Atp7a,Bbs2,Bbs4,Bmp4,Bmpr1a,Bmpr1b,Cdk4,Chsy1,Col27a1,Creb3l2,Csf1,Ctgf,Cyr61,Cytl1,Dgat2,Dicer1,Ebf2,Edn1,Eif2ak3,Fbxw4,Fto,Hif1a,Hspg2,Id2,Ift80,Igf1,Impad1,Mapk14,Mapk3,Mef2c,Mex3c,Mia3,Nfib,Paxip1,Pdgfb,Pdgfrb,Pik3ca,Ppard,Prkca,Prrx1,Pth1r,Rara,Rarg,Serpinh1,Sfrp2,Sh3pxd2b,Sik3,Slc25a25,Slc39a13,Snx19,Sox9,Spg20,Srf,Sulf1,Sulf2,Tbl1xr1,Tgfbr2,Thbs1,Thbs3,Thra,…
GO:0048872	homeostasis of number of cells	0.00439	0.0965	105	3594	Common	Adar,Add1,Ahr,Akt3,Anxa1,Arid4a,Axin1,Axl,Bak1,Bap1,Bax,Bcl6,Bcr,Bmp4,Casp3,Ccl2,Cebpg,Chst3,Col14a1,Coro1a,Csf1,Cyld,Dnaja3,Dnase2a,Dock10,Dock11,Epas1,Exoc6,F2r,Fas,Fech,G6pdx,Gata2,Gigyf2,Gpi1,Gpr183,Hcls1,Hif1a,Ift88,Ikbkb,Il7r,Ireb2,Itgam,Jak2,Jam3,Jmjd6,Kif3a,Kmt2e,L3mbtl3,Ldb1,Lgr4,Lipa,Lyn,Med1,Mef2c,Mthfd1,Nckap1l,Ncor1,Ncstn,Nfe2l1,P2rx7,Pde4b,Pknox1,Plcb1,Polb,Ppp2r3c,Ppp3cb,Prdx1,Ptpn…
GO:1903311	regulation of mRNA metabolic process	0.00447	0.0979	50	3594	Common	Ago2,Ahcyl1,Brf1,Cnot6l,Cnot7,Ddx17,Ddx5,Dicer1,Dyrk1a,Elavl1,Fmr1,Hnrnpa2b1,Hnrnpd,Hnrnpk,Hnrnpl,Hspa8,Jmjd6,Khdrbs1,Khdrbs3,Mapkapk2,Mbnl1,Mbnl2,Mettl14,Mettl16,Mettl3,Npm1,Pabpc1,Pabpc4,Pcbp4,Prpf19,Ptbp3,Ptcd2,Qk,Rbfox2,Rbm10,Rbm4,Rc3h1,Rnf219,Secisbp2,Snrnp70,Srpk1,Srsf10,Supt6,Tra2a,Tra2b,Zc3h12a,Zfp36,Zfp36l1,Zfp36l2,Zfp64
GO:0009617	response to bacterium	0.00453	0.0991	114	3594	Common	Abca1,Abr,Adh5,Akap8,Akirin2,Ankrd1,Arid5a,B2m,Bcl3,Bcr,C5ar1,Casp1,Ccl2,Cd14,Cd180,Cd36,Cd47,Cd86,Cdc73,Cdk4,Cebpb,Clec4d,Ctr9,Cxcl16,Dab2ip,Epha2,F2r,Fau,Fcgr1,Fcgr2b,Fgr,Gbp2b,Gbp3,Gsdmd,Hmgb2,Hsf1,Ifnar1,Irak1,Irak2,Irak3,Irf3,Irf8,Itgav,Jak2,Kcnj8,Lgals9,Lias,Litaf,Lyn,Lyst,Lyz2,Mapk1,Mapk14,Mapk3,Mapkapk2,Mapkapk3,Mef2c,Mrc1,Myd88,Myo1f,Nfkbia,Nod1,Nos2,Nos3,Notch2,Nr1h3,P2rx7,Pabpn1,Paf1,P…
GO:0048667	cell morphogenesis involved in neuron differentiation	3.21e-06	0.0145	45	637	Mouse	Abl2,Bbs1,Bcl2,Brsk1,Cacna1a,Chl1,Clic5,Cobl,Ctnna2,Dpysl5,Efna5,Elavl4,Epha4,Epha5,Epha7,Ephb2,Fbxo45,Fmn1,Fzd3,Gap43,Gli2,Isl1,Klf7,L1cam,Mapk8ip2,Mapt,Nefh,Nfasc,Ngfr,Nrcam,Ntng1,Ntrk1,Pak3,Plxna4,Prex2,Ptprz1,Scn1b,Sema5a,Sema6a,Slc1a3,Trim46,Tubb3,Uchl1,Unc5c,Wdpcp
GO:0048812	neuron projection morphogenesis	1.2e-05	0.0145	45	637	Mouse	Abl2,Bcl2,Brsk1,Cacna1a,Chl1,Cntnap1,Cobl,Ctnna2,Dpysl5,Efna5,Elavl4,Epha4,Epha5,Epha7,Ephb2,Fbxo45,Flrt1,Fmn1,Fzd3,Gap43,Gli2,Isl1,Klf7,L1cam,Mapk8ip2,Mapt,Nefh,Nfasc,Ngfr,Nrcam,Nrn1,Ntng1,Ntrk1,Nyap1,Pak3,Plxna4,Prex2,Ptprz1,Scn1b,Sema5a,Sema6a,Trim46,Tubb3,Uchl1,Unc5c
GO:0042391	regulation of membrane potential	1.22e-05	0.0145	29	637	Mouse	Bcl2,Cacna1a,Cacna1d,Cacna1g,Celf4,Chrna3,Cntnap1,Crtc1,Dpp6,Gpr39,Gpr88,Gria1,Igsf9b,Kcna1,Kcnb1,Kcnj2,Kcnq3,Mapk8ip2,Mpp2,Nalcn,Nrcam,Nrxn1,Pex5l,Rims3,Scn1b,Scn3b,Snca,Tusc2,Xirp1
GO:0032990	cell part morphogenesis	1.23e-05	0.0145	47	637	Mouse	Abl2,Bcl2,Brsk1,Cacna1a,Chl1,Cntnap1,Cobl,Ctnna2,Dpysl5,Efna5,Elavl4,Epha4,Epha5,Epha7,Ephb2,Fbxo45,Flrt1,Fmn1,Fzd3,Gap43,Gli2,Isl1,Klf7,L1cam,Mapk8ip2,Mapt,Nefh,Nfasc,Ngfr,Nrcam,Nrn1,Ntng1,Ntrk1,Nyap1,Opa3,Pak3,Plxna4,Prex2,Ptprz1,Scn1b,Sema5a,Sema6a,Ssbp1,Trim46,Tubb3,Uchl1,Unc5c
GO:0120039	plasma membrane bounded cell projection morphogenesis	1.63e-05	0.0154	45	637	Mouse	Abl2,Bcl2,Brsk1,Cacna1a,Chl1,Cntnap1,Cobl,Ctnna2,Dpysl5,Efna5,Elavl4,Epha4,Epha5,Epha7,Ephb2,Fbxo45,Flrt1,Fmn1,Fzd3,Gap43,Gli2,Isl1,Klf7,L1cam,Mapk8ip2,Mapt,Nefh,Nfasc,Ngfr,Nrcam,Nrn1,Ntng1,Ntrk1,Nyap1,Pak3,Plxna4,Prex2,Ptprz1,Scn1b,Sema5a,Sema6a,Trim46,Tubb3,Uchl1,Unc5c
GO:0048858	cell projection morphogenesis	2e-05	0.0157	45	637	Mouse	Abl2,Bcl2,Brsk1,Cacna1a,Chl1,Cntnap1,Cobl,Ctnna2,Dpysl5,Efna5,Elavl4,Epha4,Epha5,Epha7,Ephb2,Fbxo45,Flrt1,Fmn1,Fzd3,Gap43,Gli2,Isl1,Klf7,L1cam,Mapk8ip2,Mapt,Nefh,Nfasc,Ngfr,Nrcam,Nrn1,Ntng1,Ntrk1,Nyap1,Pak3,Plxna4,Prex2,Ptprz1,Scn1b,Sema5a,Sema6a,Trim46,Tubb3,Uchl1,Unc5c
GO:0065008	regulation of biological quality	2.42e-05	0.0163	177	637	Mouse	Acvr1c,Adgrl1,Adipor1,Adrb3,Alas2,Amigo1,Amigo2,Ampd3,Ank1,Apobec1,Arhgap44,Arntl,Aspscr1,Atpif1,Bag4,Bbs1,Bcl2,Bcl2l11,Bhlhb9,Cacna1a,Cacna1b,Cacna1d,Cacna1g,Caprin2,Ccdc88c,Ccr2,Cd24a,Celf4,Celf6,Chrna3,Cntnap1,Col11a2,Col2a1,Cplx2,Crocc,Crtc1,Ctnna2,Ctnnd2,Cyp26b1,Dagla,Dbh,Dclre1c,Ddit3,Dmtn,Doc2b,Dpp6,Efna5,Epha4,Epha5,Epha7,Ephb2,Erbb4,Ercc6,F13a1,F7,Fancc,Fh1,Fitm2,Flrt1,Flvcr1,Fmn1,Gch1,G…
GO:0007409	axonogenesis	5.07e-05	0.0299	35	637	Mouse	Bcl2,Brsk1,Chl1,Cobl,Ctnna2,Dpysl5,Efna5,Epha4,Epha5,Epha7,Ephb2,Fbxo45,Fzd3,Gap43,Gli2,Isl1,Klf7,L1cam,Mapt,Nefh,Nfasc,Ngfr,Nrcam,Ntng1,Ntrk1,Pak3,Plxna4,Ptprz1,Scn1b,Sema5a,Sema6a,Trim46,Tubb3,Uchl1,Unc5c
GO:0007158	neuron cell-cell adhesion	7.12e-05	0.0327	4	637	Mouse	Astn1,Nrxn1,Ret,Tnr
GO:0007269	neurotransmitter secretion	8.06e-05	0.0327	10	637	Mouse	Cacna1a,Cacna1b,Doc2b,Nrxn1,Snap25,Snap91,Syn1,Syn2,Syt1,Syt4
GO:0099643	signal release from synapse	8.06e-05	0.0327	10	637	Mouse	Cacna1a,Cacna1b,Doc2b,Nrxn1,Snap25,Snap91,Syn1,Syn2,Syt1,Syt4
GO:0000904	cell morphogenesis involved in differentiation	8.33e-05	0.0327	49	637	Mouse	Abl2,Bbs1,Bcl2,Brsk1,Cacna1a,Chl1,Clic5,Cobl,Col18a1,Ctnna2,Dpysl5,Efna5,Elavl4,Epb41l5,Epha4,Epha5,Epha7,Ephb2,Fat3,Fbxo45,Fer,Fmn1,Fzd3,Gap43,Gli2,Isl1,Klf7,L1cam,Mapk8ip2,Mapt,Nefh,Nfasc,Ngfr,Nrcam,Ntng1,Ntrk1,Pak3,Plxna4,Prex2,Ptprz1,Scn1b,Sema5a,Sema6a,Slc1a3,Trim46,Tubb3,Uchl1,Unc5c,Wdpcp
GO:0002021	response to dietary excess	9.36e-05	0.0339	8	637	Mouse	Acvr1c,Clic5,Gdf3,Gpr39,Pcsk1n,Trpv4,Ucp1,Vgf
GO:0050804	modulation of chemical synaptic transmission	0.000112	0.0351	28	637	Mouse	Cacna1a,Celf4,Chrna3,Cplx2,Ctnnd2,Ephb2,Igsf9b,Il1b,Jph3,Kcnb1,Kcnc4,Mapk8ip2,Mpp2,Nat8l,Nrxn1,Pcdh17,Phf24,S100b,Slc1a3,Slc8a3,Snap25,Snap47,Snca,Syn1,Syngap1,Syt1,Syt4,Tnr
GO:0099177	regulation of trans-synaptic signaling	0.000112	0.0351	28	637	Mouse	Cacna1a,Celf4,Chrna3,Cplx2,Ctnnd2,Ephb2,Igsf9b,Il1b,Jph3,Kcnb1,Kcnc4,Mapk8ip2,Mpp2,Nat8l,Nrxn1,Pcdh17,Phf24,S100b,Slc1a3,Slc8a3,Snap25,Snap47,Snca,Syn1,Syngap1,Syt1,Syt4,Tnr
GO:0007610	behavior	0.000141	0.0415	58	637	Mouse	Abat,Abl2,Adam22,Aff2,Astn1,Atxn3,Bbs1,Bcl2,Bhlhb9,Cacna1a,Cacna1b,Celf6,Chl1,Chrna3,Crtc1,Ctnnd2,Dbh,Elavl4,Epha4,Ephb2,Fign,Gcnt4,Gpr157,Gpr176,Gpr39,Gpr88,Gria1,Jph3,Lgi4,Lsamp,Mapk10,Mapk8ip2,Mmp17,Ndrg4,Npas2,Nrxn1,Ntrk1,Pcdh17,Pirt,Pomk,Prex2,Prkar2b,Ptprz1,Rnf180,S100b,Scn9a,Slc10a4,Slc18a2,Slc1a3,Slc8a3,Snap25,Sptbn2,Srpx2,Syngap1,Syt4,Tmod2,Tnr,Uchl1
GO:0061564	axon development	0.0002	0.0553	35	637	Mouse	Bcl2,Brsk1,Chl1,Cobl,Ctnna2,Dpysl5,Efna5,Epha4,Epha5,Epha7,Ephb2,Fbxo45,Fzd3,Gap43,Gli2,Isl1,Klf7,L1cam,Mapt,Nefh,Nfasc,Ngfr,Nrcam,Ntng1,Ntrk1,Pak3,Plxna4,Ptprz1,Scn1b,Sema5a,Sema6a,Trim46,Tubb3,Uchl1,Unc5c
GO:0031175	neuron projection development	0.000223	0.0584	54	637	Mouse	Abl2,Bbs1,Bcl2,Brsk1,Cacna1a,Cd24a,Chl1,Clic5,Cntnap1,Cobl,Ctnna2,Dpysl5,Efna5,Elavl4,Epha4,Epha5,Epha7,Ephb2,Fbxo45,Flrt1,Fmn1,Fzd3,Gap43,Gli2,Igsf9,Isl1,Klf7,L1cam,Mapk8ip2,Mapt,Nefh,Nfasc,Ngf,Ngfr,Nrcam,Nrn1,Ntng1,Ntrk1,Nyap1,Pak3,Plxna4,Pqbp1,Prex2,Psd,Ptprz1,Scn1b,Sema5a,Sema6a,Syngap1,Trim46,Tubb3,Uchl1,Uhmk1,Unc5c
GO:0023061	signal release	0.000236	0.0585	16	637	Mouse	Cacna1a,Cacna1b,Doc2b,Ildr2,Nrxn1,Pclo,Ptprn,Rab11fip2,Smpd3,Snap25,Snap91,Syn1,Syn2,Syt1,Syt4,Trpv4
GO:0097479	synaptic vesicle localization	0.000259	0.059	11	637	Mouse	Ap3b2,Ap3s1,Cacna1a,Doc2b,Nrxn1,Snap91,Snca,Syn1,Syt1,Syt4,Trim46
GO:0099536	synaptic signaling	0.000275	0.059	25	637	Mouse	Cacna1a,Cacna1b,Camk4,Cd24a,Chrna3,Dagla,Dlg2,Dlgap1,Doc2b,Ephb2,Gjc1,Gria1,Gria2,Mapk8ip2,Mpp2,Nrxn1,Snap25,Snap91,Snca,Sv2c,Syn1,Syn2,Syt1,Syt4,Tmod2
GO:0099537	trans-synaptic signaling	0.000275	0.059	25	637	Mouse	Cacna1a,Cacna1b,Camk4,Cd24a,Chrna3,Dagla,Dlg2,Dlgap1,Doc2b,Ephb2,Gjc1,Gria1,Gria2,Mapk8ip2,Mpp2,Nrxn1,Snap25,Snap91,Snca,Sv2c,Syn1,Syn2,Syt1,Syt4,Tmod2
GO:0007267	cell-cell signaling	0.000308	0.0631	43	637	Mouse	Cacna1a,Cacna1b,Cacna1d,Cacna1g,Camk4,Cd24a,Chrna3,Dagla,Dlg2,Dlgap1,Doc2b,Ephb2,Fgf7,Fzd3,Fzd5,Gjc1,Gli1,Gli2,Grem1,Gria1,Gria2,Ildr2,Kras,Mapk8ip2,Mgat3,Mpp2,Nrxn1,Pclo,Ptprn,Rab11fip2,Scn3b,Smpd3,Snap25,Snap91,Snca,Sox4,Sv2c,Syn1,Syn2,Syt1,Syt4,Tmod2,Trpv4
GO:0097120	receptor localization to synapse	0.000338	0.0654	6	637	Mouse	Arhgap44,Kif5a,Nrxn1,Nsg1,Snap25,Snap47
GO:0022008	neurogenesis	0.000353	0.0654	111	637	Mouse	Abl2,Adam22,Alg10b,Arhgap44,Arntl,Astn1,Avil,Bbs1,Bcl2,Bhlhb9,Brsk1,Cacna1a,Camk1d,Caprin2,Casz1,Cd24a,Chl1,Chrna3,Clic5,Cntnap1,Cobl,Ctnna2,Cyb5d2,Dagla,Dpysl5,Dusp10,Edn3,Efna5,Elavl4,Epha4,Epha5,Epha7,Ephb2,Erbb3,Erbb4,Fabp7,Faim2,Fat3,Fbxo45,Fgf2,Flrt1,Fmn1,Frs2,Fzd3,Gap43,Gli2,Gpr157,Igsf9,Isl1,Islr2,Kcna1,Klf7,Kras,L1cam,Lgi4,Mapk8ip2,Mapt,Mosmo,Myrf,Nefh,Nfasc,Ngef,Ngf,Ngfr,Nrcam,Nrn1,Nrxn…
GO:0032940	secretion by cell	0.000361	0.0654	28	637	Mouse	Akap5,Cacna1a,Cacna1b,Cd300a,Dmtn,Doc2b,Ephb6,Gbp5,Ildr2,Lmf1,Nrxn1,Pclo,Prss12,Ptprn,Rab11fip2,Rasgrp1,Smpd3,Snap25,Snap47,Snap91,Stx11,Stx1a,Syn1,Syn2,Syt1,Syt4,Trpv4,Unc13d
GO:0032879	regulation of localization	0.00042	0.0733	111	637	Mouse	Acvr1c,Amigo1,Arntl,Aspscr1,Astn2,Atpif1,Azin2,Bag4,Bbs1,Bcl2,Cacna1a,Cacna1b,Cacna1d,Camk1d,Camk4,Ccbe1,Ccr2,Cd300a,Cd300c2,Chrna3,Col18a1,D1Ertd622e,Ddit3,Dmtn,Dnajc27,Doc2b,Dpp6,Dusp10,Edn3,Efna5,Epb41l5,Epha5,Ephb2,Eppk1,Erbb4,Fer,Fgf14,Fgf2,Fitm2,Fxyd2,Gpc3,Gpr39,Grem1,Havcr2,Hbegf,Htr2b,Ifi27,Il1b,Inhbb,Inpp4b,Jph3,Jph4,Kcna2,Kcnb1,Kcnc4,Kcnip4,Kcnn4,Lbp,Ldlr,Letm1,Lrrc32,Mapk8ip2,Mapt,Mmp3…
GO:1901888	regulation of cell junction assembly	0.000463	0.0779	7	637	Mouse	Dmtn,Epb41l5,Fmn1,Fzd5,Grem1,Nedd4l,Wdpcp
GO:0016192	vesicle-mediated transport	0.000511	0.0831	42	637	Mouse	Abl2,Ap1g2,Ap3b2,Ap3s1,Arhgap44,Cacna1a,Cd24a,Cd300a,Clcn5,Dmtn,Doc2b,Gria1,Htr2b,Kif5a,Ldlr,Lepr,Lmf1,Lrba,Megf10,Ndrg4,Neurl1b,Nsg1,Pacsin1,Prss12,Rab11fip2,Rasgrp1,Rinl,Slc11a1,Snap25,Snap47,Snap91,Snca,Stx11,Stx1a,Syt1,Syt4,Trim46,Tub,Tusc2,Tusc5,Unc13d,Vamp1
GO:0001508	action potential	0.000532	0.0835	10	637	Mouse	Cacna1d,Cacna1g,Cntnap1,Dpp6,Gpr88,Kcna1,Kcnj2,Nrcam,Scn1b,Scn3b
GO:0035637	multicellular organismal signaling	0.000558	0.0847	12	637	Mouse	Cacna1a,Cacna1d,Cacna1g,Cntnap1,Dpp6,Gjc1,Gpr88,Kcna1,Nfasc,Nrcam,Scn1b,Scn3b
GO:0050803	regulation of synapse structure or activity	0.000584	0.086	19	637	Mouse	Adgrl1,Amigo1,Amigo2,Arhgap44,Bhlhb9,Caprin2,Ctnna2,Efna5,Epha4,Epha7,Ephb2,Flrt1,Igsf9,Lrrn3,Lrrtm2,Ngef,Nrxn1,Ntrk1,Syngap1
GO:0098916	anterograde trans-synaptic signaling	0.000722	0.0947	23	637	Mouse	Cacna1a,Cacna1b,Camk4,Cd24a,Chrna3,Dlg2,Dlgap1,Doc2b,Gjc1,Gria1,Gria2,Mapk8ip2,Mpp2,Nrxn1,Snap25,Snap91,Snca,Sv2c,Syn1,Syn2,Syt1,Syt4,Tmod2
GO:0007268	chemical synaptic transmission	0.000722	0.0947	23	637	Mouse	Cacna1a,Cacna1b,Camk4,Cd24a,Chrna3,Dlg2,Dlgap1,Doc2b,Gjc1,Gria1,Gria2,Mapk8ip2,Mpp2,Nrxn1,Snap25,Snap91,Snca,Sv2c,Syn1,Syn2,Syt1,Syt4,Tmod2
GO:0006836	neurotransmitter transport	0.000722	0.0947	14	637	Mouse	Cacna1a,Cacna1b,Cd300a,Doc2b,Nrxn1,Slc1a3,Slc36a2,Slc6a2,Snap25,Snap91,Syn1,Syn2,Syt1,Syt4
GO:0007411	axon guidance	0.000767	0.0947	22	637	Mouse	Chl1,Dpysl5,Efna5,Epha4,Epha5,Epha7,Ephb2,Fzd3,Gap43,Gli2,Isl1,Klf7,L1cam,Nfasc,Ngfr,Nrcam,Plxna4,Scn1b,Sema5a,Sema6a,Tubb3,Unc5c
GO:0086010	membrane depolarization during action potential	0.000777	0.0947	3	637	Mouse	Cacna1d,Cacna1g,Scn1b
GO:0086012	membrane depolarization during cardiac muscle cell action potential	0.000777	0.0947	3	637	Mouse	Cacna1d,Cacna1g,Scn1b
GO:0007154	cell communication	0.000784	0.0947	155	637	Mouse	Adcyap1r1,Adipor1,Adrb3,Ar,Bcl2,Bcl2l11,Bmf,Bsn,Cacna1a,Cacna1b,Cacna1d,Cacna1g,Camk4,Car8,Cd24a,Cdc42ep4,Cenpj,Chrm2,Chrna3,Clca3a2,Cntnap1,Col4a3,Cyp26b1,Cysltr1,Dagla,Ddit3,Dlg2,Dlgap1,Dmtn,Doc2b,Dpp6,Efna5,Eif2ak2,Epha5,Epha7,Ephb2,Ercc6,Ereg,Fer,Fgf7,Flrt1,Frs2,Fzd3,Fzd5,Gas2l1,Gdf3,Gfra1,Gjc1,Gli1,Gli2,Gnal,Gnaz,Gpr157,Gpr158,Gpr161,Gpr176,Gpr88,Grem1,Grem2,Gria1,Gria2,Grip2,Havcr2,Hbegf,Hh…
GO:0032989	cellular component morphogenesis	0.000875	0.0982	60	637	Mouse	Abl2,Bbs1,Bcl2,Brsk1,Cacna1a,Ccdc136,Chl1,Clic5,Cntnap1,Cobl,Col18a1,Ctnna2,Dpysl5,Efna5,Elavl4,Epb41l5,Epha4,Epha5,Epha7,Ephb2,Fat3,Fbxo45,Fer,Flrt1,Fmn1,Fzd3,Gap43,Gli2,Isl1,Klf7,L1cam,Ldb3,Mapk8ip2,Mapt,Nefh,Nfasc,Ngfr,Nrcam,Nrn1,Ntng1,Ntrk1,Nyap1,Opa3,Pak3,Plxna4,Prex2,Ptprz1,Scn1b,Sema5a,Sema6a,Slc1a3,Sox6,Ssbp1,Tenm4,Trim46,Tubb3,Uchl1,Unc5c,Wdpcp,Xirp1
GO:0099003	vesicle-mediated transport in synapse	0.000891	0.0982	11	637	Mouse	Ap3b2,Ap3s1,Cacna1a,Cd24a,Doc2b,Pacsin1,Snap91,Snca,Syt1,Syt4,Trim46
GO:0002024	diet induced thermogenesis	0.000917	0.0982	4	637	Mouse	Clic5,Gpr39,Trpv4,Ucp1
GO:1903540	establishment of protein localization to postsynaptic membrane	0.000917	0.0982	4	637	Mouse	Arhgap44,Nsg1,Snap25,Snap47
GO:0098969	neurotransmitter receptor transport to postsynaptic membrane	0.000917	0.0982	4	637	Mouse	Arhgap44,Nsg1,Snap25,Snap47

## Sheet: Cellular_component
TermID	Term	P	Q	k	n	Query set	Gene symbols
GO:0005622	intracellular	1.67e-33	1.62e-30	2904	3587	Common	0610009O20Rik,1110008F13Rik,1190002N15Rik,1700021F05Rik,2010107E04Rik,2010111I01Rik,2410015M20Rik,2700049A03Rik,3110043O21Rik,4833439L19Rik,Aamdc,Aatf,Abca1,Abca3,Abca5,Abcb10,Abcb7,Abcb8,Abcc9,Abcd1,Abcd3,Abcd4,Abcf2,Abhd10,Abhd12,Abhd13,Abhd17b,Abhd2,Abhd5,Ablim1,Abr,Abraxas2,Acaa1a,Acaa2,Acaca,Acacb,Acad11,Acad8,Acad9,Acadl,Acadm,Acads,Acadsb,Acadvl,Acat1,Ace,Acin1,Acly,Aco1,Aco2,Acot13,Acot7,…
GO:0044424	intracellular part	6.04e-33	2.92e-30	2883	3587	Common	0610009O20Rik,1110008F13Rik,1190002N15Rik,1700021F05Rik,2010107E04Rik,2010111I01Rik,2410015M20Rik,2700049A03Rik,3110043O21Rik,4833439L19Rik,Aamdc,Aatf,Abca1,Abca3,Abca5,Abcb10,Abcb7,Abcb8,Abcc9,Abcd1,Abcd3,Abcd4,Abcf2,Abhd10,Abhd12,Abhd13,Abhd17b,Abhd2,Abhd5,Ablim1,Abr,Abraxas2,Acaa1a,Acaa2,Acaca,Acacb,Acad11,Acad8,Acad9,Acadl,Acadm,Acads,Acadsb,Acadvl,Acat1,Ace,Acin1,Acly,Aco1,Aco2,Acot13,Acot7,…
GO:0043229	intracellular organelle	8.54e-30	2.75e-27	2491	3587	Common	0610009O20Rik,1110008F13Rik,1190002N15Rik,1700021F05Rik,2010107E04Rik,2010111I01Rik,2410015M20Rik,2700049A03Rik,3110043O21Rik,Aatf,Abca1,Abca3,Abca5,Abcb10,Abcb7,Abcb8,Abcc9,Abcd1,Abcd3,Abcd4,Abcf2,Abhd10,Abhd17b,Abhd2,Abhd5,Ablim1,Abraxas2,Acaa1a,Acaa2,Acaca,Acacb,Acad11,Acad8,Acad9,Acadl,Acadm,Acads,Acadsb,Acadvl,Acat1,Acin1,Acly,Aco1,Aco2,Acot13,Acot9,Acox1,Acox3,Acp2,Acp6,Acsf2,Acsl4,Acsl5,Ac…
GO:0043231	intracellular membrane-bounded organelle	6.51e-26	1.57e-23	2039	3587	Common	0610009O20Rik,1110008F13Rik,1700021F05Rik,2010107E04Rik,2010111I01Rik,2410015M20Rik,3110043O21Rik,Aatf,Abca1,Abca5,Abcb10,Abcb7,Abcb8,Abcd1,Abcd3,Abcd4,Abcf2,Abhd10,Abraxas2,Acaa1a,Acaa2,Acaca,Acacb,Acad11,Acad8,Acad9,Acadl,Acadm,Acads,Acadsb,Acadvl,Acat1,Acin1,Acly,Aco1,Aco2,Acot13,Acot9,Acox1,Acox3,Acp2,Acp6,Acsf2,Acsl4,Acsl5,Acss1,Actl6a,Adam10,Adam19,Adar,Adarb1,Adck1,Add3,Adh1,Adh5,Adhfe1,Ad…
GO:0043227	membrane-bounded organelle	6.73e-25	1.3e-22	2239	3587	Common	0610009O20Rik,1110008F13Rik,1190002N15Rik,1700021F05Rik,2010107E04Rik,2010111I01Rik,2410015M20Rik,3110043O21Rik,Aatf,Abca1,Abca3,Abca5,Abcb10,Abcb7,Abcb8,Abcd1,Abcd3,Abcd4,Abcf2,Abhd10,Abhd17b,Abhd2,Abraxas2,Acaa1a,Acaa2,Acaca,Acacb,Acad11,Acad8,Acad9,Acadl,Acadm,Acads,Acadsb,Acadvl,Acat1,Acin1,Acly,Aco1,Aco2,Acot13,Acot9,Acox1,Acox3,Acp2,Acp6,Acsf2,Acsl4,Acsl5,Acss1,Actl6a,Actn1,Adam10,Adam19,Ad…
GO:0043226	organelle	4.57e-21	7.36e-19	2569	3587	Common	0610009O20Rik,1110008F13Rik,1190002N15Rik,1700021F05Rik,2010107E04Rik,2010111I01Rik,2410015M20Rik,2410089E03Rik,2700049A03Rik,3110043O21Rik,Aatf,Abca1,Abca3,Abca5,Abcb10,Abcb7,Abcb8,Abcc9,Abcd1,Abcd3,Abcd4,Abcf2,Abhd10,Abhd17b,Abhd2,Abhd5,Ablim1,Abraxas2,Acaa1a,Acaa2,Acaca,Acacb,Acad11,Acad8,Acad9,Acadl,Acadm,Acads,Acadsb,Acadvl,Acat1,Acin1,Acly,Aco1,Aco2,Acot13,Acot9,Acox1,Acox3,Acp2,Acp6,Acsf2,…
GO:0044446	intracellular organelle part	8.86e-17	1.22e-14	1015	3587	Common	2010111I01Rik,2700049A03Rik,Aatf,Abca3,Abcb10,Abcb7,Abcd1,Abcd3,Abcd4,Abhd17b,Acaa2,Acat1,Acin1,Acox1,Acox3,Acsl5,Acss1,Actl6a,Actn1,Actr10,Actr2,Adam8,Adar,Add3,Aebp2,Aff4,Afg3l1,Ahctf1,Ahi1,Ahr,Aif1,Aifm1,Ak2,Ak3,Akap13,Akap6,Akap8,Akap8l,Akap9,Aldh3a2,Alkbh1,Als2,Ambra1,Anapc10,Ankfy1,Ankrd26,Anxa7,Ap1b1,Ap1g1,Ap1m1,Ap3b1,Ap4e1,Ap4m1,Ap4s1,Apc,Apex2,App,Arhgap35,Arhgef2,Arid1a,Arid1b,Arid2,Arl…
GO:0005737	cytoplasm	1.79e-16	2.16e-14	2099	3587	Common	0610009O20Rik,1110008F13Rik,1190002N15Rik,1700021F05Rik,2010107E04Rik,2410015M20Rik,3110043O21Rik,4833439L19Rik,Aamdc,Aatf,Abca1,Abca3,Abca5,Abcb10,Abcb7,Abcb8,Abcc9,Abcd1,Abcd3,Abcd4,Abcf2,Abhd10,Abhd12,Abhd13,Abhd17b,Abhd2,Abhd5,Abr,Abraxas2,Acaa1a,Acaa2,Acaca,Acacb,Acad11,Acad8,Acad9,Acadl,Acadm,Acads,Acadsb,Acadvl,Acat1,Ace,Acly,Aco1,Aco2,Acot13,Acot7,Acot9,Acox1,Acox3,Acp1,Acp2,Acp6,Acsf2,Ac…
GO:0044444	cytoplasmic part	2.05e-16	2.2e-14	1626	3587	Common	0610009O20Rik,1110008F13Rik,1190002N15Rik,1700021F05Rik,2010107E04Rik,2410015M20Rik,Abca1,Abca3,Abca5,Abcb10,Abcb7,Abcb8,Abcc9,Abcd1,Abcd3,Abcd4,Abcf2,Abhd10,Abhd12,Abhd13,Abhd17b,Abhd2,Abhd5,Abr,Acaa1a,Acaa2,Acaca,Acacb,Acad11,Acad8,Acad9,Acadl,Acadm,Acads,Acadsb,Acadvl,Acat1,Acly,Aco1,Aco2,Acot13,Acot7,Acot9,Acox1,Acox3,Acp1,Acp2,Acp6,Acsf2,Acsl4,Acsl5,Acss1,Acta2,Actn1,Actr2,Adam19,Adamts1,Adc…
GO:1902494	catalytic complex	8.31e-13	8.02e-11	180	3587	Common	Actl6a,Aebp2,Afg3l1,Ago2,Anapc10,Arid1a,Arid1b,Arid2,Asb2,Ash2l,Atg13,Atg14,Atp1b1,Becn1,Bmi1,Brd4,Brd7,Cacybp,Cbx5,Cbx7,Ccnd2,Ccnt1,Cdk13,Cdk2,Cdk4,Cdk6,Chd3,Chd4,Crebbp,Cul1,Cul2,Cul7,Dlat,Dpf2,Dr1,Dynll1,Dynlrb1,Eea1,Eed,Ep300,Ercc1,Etfa,Etfdh,Ezh1,Ezh2,Fbxo25,Fbxo4,Fbxo6,Fbxw11,Fbxw8,Gclc,Gclm,Gna12,Gna13,Gnai3,Gnao1,Gnaq,Gpd2,Hdac1,Hdac2,Hdac3,Hdac5,Hdac7,Hdac8,Hdac9,Itpr1,Jarid2,Kat14,Kat2a…
GO:0043209	myelin sheath	1.21e-12	1.06e-10	135	3587	Common	Aco2,Actr1a,Aldoa,Anxa2,Arf6,Atp1a1,Atp1a2,Atp1b1,Atp5b,Atp5c1,Atp5f1,Atp5h,Atp5o,Atp6v1a,Atp6v1b2,Canx,Car13,Cct2,Cct3,Cct5,Cdc42,Ckb,Cltc,Cnp,Cnrip1,Cntn1,Cox5a,Cox6a1,Cryab,Dlat,Dld,Dlg1,Dlst,Dpysl2,Eef1a1,Ehd3,Eno2,Erbb2,Exoc4,Ezr,Fscn1,Gapdh,Gdi1,Gdi2,Glul,Gnao1,Gnb1,Gnb2,Gnb4,Gnb5,Got2,Gpi1,Hsp90aa1,Hspa2,Hspa5,Hspa8,Hspa9,Hspd1,Idh3a,Igsf8,Immt,Itgb1,Jam3,Ldhb,Llgl1,Mbp,Mdh1,Mdh2,Mif,Mpdz,…
GO:0044422	organelle part	1.48e-10	1.19e-08	1106	3587	Common	2010111I01Rik,2410089E03Rik,2700049A03Rik,Aatf,Abca3,Abcb10,Abcb7,Abcc9,Abcd1,Abcd3,Abcd4,Abhd17b,Acaa2,Acat1,Acin1,Acox1,Acox3,Acsl5,Acss1,Acta2,Actl6a,Actn1,Actr10,Actr2,Adam8,Adar,Add3,Aebp2,Aff4,Afg3l1,Ahctf1,Ahi1,Ahnak,Ahr,Aif1,Aifm1,Ak2,Ak3,Akap13,Akap6,Akap8,Akap8l,Akap9,Aldh3a2,Aldoa,Alkbh1,Als2,Ambra1,Anapc10,Ank2,Ankfy1,Ankrd1,Ankrd26,Anxa7,Ap1b1,Ap1g1,Ap1m1,Ap3b1,Ap4e1,Ap4m1,Ap4s1,Apc,…
GO:0044428	nuclear part	5.02e-10	3.73e-08	401	3587	Common	2010111I01Rik,Aatf,Acin1,Actl6a,Adar,Add3,Aebp2,Ahctf1,Ahr,Akap6,Akap8,Akap8l,Alkbh1,Anapc10,Anxa7,Arid1a,Arid1b,Arid2,Ash2l,Asxl2,Atf1,Atrx,Atxn1,Basp1,Baz1a,Baz2a,Bche,Bin1,Bmi1,Brd4,Brd7,Btd,Bysl,Cacybp,Calcoco1,Carm1,Casp8,Cbx3,Cbx4,Cbx5,Cbx7,Ccnc,Ccnt1,Cdk13,Cdk8,Cebpb,Cenpc1,Cenpe,Chd3,Chd4,Ciapin1,Clip1,Cmtm3,Cops2,Cops3,Cops4,Cops5,Cops6,Cops8,Cpsf2,Cpsf3,Creb1,Crebbp,Crebrf,Ctc1,Ctnnb1,C…
GO:0032991	protein-containing complex	6.65e-10	4.59e-08	704	3587	Common	Abhd12,Actl6a,Actr10,Adam8,Aebp2,Afg3l1,Ago1,Ago2,Ago4,Ahi1,Ahr,Aimp1,Ajuba,Aldoa,Anapc10,Ankrd1,Ap2a1,Apbb1ip,Apc,Arf1,Arhgef2,Arid1a,Arid1b,Arid2,Arl6ip1,Arnt,Arpc1a,Arpc1b,Arpc2,Arpc3,Arpc4,Asap1,Asb2,Ash2l,Atf1,Atf7ip,Atg13,Atg14,Atp1b1,Atp2b4,Atp6v0c,Atxn1,Axin1,Baz2a,Bbs2,Bbs4,Bbs7,Bbs9,Becn1,Birc2,Bloc1s5,Bloc1s6,Bmi1,Brd4,Brd7,Btbd1,C3,Cacna1c,Cacnb2,Cacnb3,Cacybp,Camk2d,Caprin1,Capza1,Ca…
GO:0005829	cytosol	2.5e-09	1.61e-07	270	3587	Common	Abhd5,Abr,Acaca,Aco1,Acot7,Acp1,Adk,Agbl5,Ago1,Ago2,Agtpbp1,Ahcyl1,Ahcyl2,Ahnak,Ahr,Aifm1,Ajuba,Akr1a1,Aldh9a1,Ambra1,Anxa2,Anxa7,Apaf1,Apbb1ip,Arf1,Arhgap10,Arl6ip1,Arrb1,Asap1,Aspa,Atg13,Atp6v1a,Atp6v1b2,Atp6v1e1,Atp6v1g1,Bad,Bag1,Bag6,Bak1,Bax,Bcl10,Bcl2l1,Bcl2l2,Bcr,Bex3,Bid,Bloc1s5,Bloc1s6,Btbd3,Capn1,Capn2,Car13,Carm1,Cask,Casp1,Casp9,Cct2,Cct3,Cct4,Cct5,Cct7,Cct8,Cdc37,Cdc42,Cdk14,Cdk5,Cdk…
GO:0070013	intracellular organelle lumen	3.33e-09	1.78e-07	364	3587	Common	2010111I01Rik,Aatf,Acin1,Acox3,Acss1,Actl6a,Adar,Add3,Aebp2,Ahctf1,Aifm1,Ak3,Akap8,Akap8l,Alkbh1,Arid1a,Arid1b,Arid2,Ash2l,Asxl2,Atrx,Basp1,Baz1a,Baz2a,Bche,Bmi1,Brd4,Brd7,Btd,Bysl,Cacybp,Calcoco1,Cbx3,Cbx4,Cbx5,Ccnc,Ccnt1,Cdk8,Cebpb,Cenpc1,Cenpe,Ces1d,Chd3,Chd4,Ciapin1,Cln5,Cpsf2,Cpsf3,Creb1,Crebbp,Crebrf,Cs,Ctc1,Ctnnb1,Ctsl,Cul2,Cxxc1,Dap3,Daxx,Ddx20,Ddx39b,Ddx56,Dhx33,Dhx9,Dkc1,Dlat,Dnajb9,Dna…
GO:0031974	membrane-enclosed lumen	3.33e-09	1.78e-07	364	3587	Common	2010111I01Rik,Aatf,Acin1,Acox3,Acss1,Actl6a,Adar,Add3,Aebp2,Ahctf1,Aifm1,Ak3,Akap8,Akap8l,Alkbh1,Arid1a,Arid1b,Arid2,Ash2l,Asxl2,Atrx,Basp1,Baz1a,Baz2a,Bche,Bmi1,Brd4,Brd7,Btd,Bysl,Cacybp,Calcoco1,Cbx3,Cbx4,Cbx5,Ccnc,Ccnt1,Cdk8,Cebpb,Cenpc1,Cenpe,Ces1d,Chd3,Chd4,Ciapin1,Cln5,Cpsf2,Cpsf3,Creb1,Crebbp,Crebrf,Cs,Ctc1,Ctnnb1,Ctsl,Cul2,Cxxc1,Dap3,Daxx,Ddx20,Ddx39b,Ddx56,Dhx33,Dhx9,Dkc1,Dlat,Dnajb9,Dna…
GO:0043233	organelle lumen	3.33e-09	1.78e-07	364	3587	Common	2010111I01Rik,Aatf,Acin1,Acox3,Acss1,Actl6a,Adar,Add3,Aebp2,Ahctf1,Aifm1,Ak3,Akap8,Akap8l,Alkbh1,Arid1a,Arid1b,Arid2,Ash2l,Asxl2,Atrx,Basp1,Baz1a,Baz2a,Bche,Bmi1,Brd4,Brd7,Btd,Bysl,Cacybp,Calcoco1,Cbx3,Cbx4,Cbx5,Ccnc,Ccnt1,Cdk8,Cebpb,Cenpc1,Cenpe,Ces1d,Chd3,Chd4,Ciapin1,Cln5,Cpsf2,Cpsf3,Creb1,Crebbp,Crebrf,Cs,Ctc1,Ctnnb1,Ctsl,Cul2,Cxxc1,Dap3,Daxx,Ddx20,Ddx39b,Ddx56,Dhx33,Dhx9,Dkc1,Dlat,Dnajb9,Dna…
GO:0005634	nucleus	3.58e-09	1.78e-07	1081	3587	Common	2010111I01Rik,3110043O21Rik,Aatf,Abraxas2,Acin1,Actl6a,Adam10,Adar,Adarb1,Add3,Adk,Adprhl2,Aebp2,Aff1,Aff4,Agap3,Agbl5,Agl,Ago1,Ago2,Ago4,Agtpbp1,Ahctf1,Ahnak,Ahr,Aif1,Aifm1,Ajuba,Akap6,Akap8,Akap8l,Alkbh1,Alox5ap,Anapc1,Anapc10,Ankrd1,Ankrd54,Anp32a,Anxa7,Apaf1,Apbb1,Apbb2,Apc,Apex2,Arid1a,Arid1b,Arid2,Arid5a,Arl4a,Arnt,Ash2l,Asxl2,Ate1,Atf1,Atf2,Atf3,Atf6,Atm,Atoh8,Atr,Atrx,Atxn1,Atxn7,Azin1,Ba…
GO:0005743	mitochondrial inner membrane	3.69e-09	1.78e-07	122	3587	Common	Abcb10,Abcb7,Abcd3,Acaa2,Acat1,Acsl5,Afg3l1,Ak2,Aldh3a2,Apex2,Atp5b,Atp5c1,Atp5e,Atp5f1,Atp5g1,Atp5h,Atp5j,Atp5l,Bckdhb,Chchd3,Clpx,Cox15,Cox4i1,Cox5a,Cox6b1,Cox6c,Cox7a2,Cox7a2l,Cpt1a,Csde1,Cyb5b,Cyb5r3,Cyp27a1,Dhrs1,Dnajc11,Dnajc15,Eci1,Efhd1,Etfdh,Fech,Gcdh,Glud1,Got2,Gpam,Gpd2,Hadh,Hadha,Hadhb,Herc2,Hmgcl,Hsd17b10,Hspd1,Idh2,Lrrk2,Maob,Marc2,Mccc1,Mdh2,Mgst1,Mpc1,Mrpl17,Mrps21,Mtx1,Ndufa3,Ndu…
GO:0019866	organelle inner membrane	4.37e-09	2.01e-07	131	3587	Common	Abcb10,Abcb7,Abcd3,Acaa2,Acat1,Acsl5,Afg3l1,Ak2,Aldh3a2,Apex2,Atp5b,Atp5c1,Atp5e,Atp5f1,Atp5g1,Atp5h,Atp5j,Atp5l,Bckdhb,Chchd3,Clpx,Cox15,Cox4i1,Cox5a,Cox6b1,Cox6c,Cox7a2,Cox7a2l,Cpt1a,Csde1,Cyb5b,Cyb5r3,Cyp27a1,Dhrs1,Dnajc11,Dnajc15,Eci1,Efhd1,Emd,Ern1,Etfdh,Fech,Gcdh,Glud1,Got2,Gpam,Gpd2,Hadh,Hadha,Hadhb,Herc2,Hmgcl,Hsd17b10,Hspd1,Idh2,Itpr1,Lbr,Lmnb1,Lrrk2,Maob,Marc2,Mccc1,Mdh2,Mgst1,Mpc1,Mrpl…
GO:0005773	vacuole	6.73e-09	2.95e-07	86	3587	Common	Abca5,Acp2,Atg16l1,Atg5,Atg9a,Atp6v0c,Atp6v1g1,Atraid,Becn1,Capn1,Capn2,Ccdc115,Cd1d1,Cd63,Cd74,Cdc42,Clec16a,Cln3,Cln5,Ctns,Ctsb,Ctsd,Ctsl,Ctss,Cyb561a3,Dld,Dnase2a,Epdr1,Gabarap,Galc,Gba,Ggh,Gla,Glmp,Gusb,H2-Aa,H2-DMa,Hexa,Hexb,Irgm1,Itm2c,Lamp1,Lamp2,Lgmn,Lmbrd1,Lrrk2,Manba,Map1lc3b,March1,Milr1,Mt1,Mtmr2,Nbr1,Neu1,Npc1,Plbd2,Ppt1,Rab12,Rab24,Rab7,Rnf13,Rnf19b,Sbf2,Scarb2,Sidt2,Slc35f6,Snap29,…
GO:0005764	lysosome	1.52e-08	5.87e-07	66	3587	Common	Abca5,Acp2,Atp6v1g1,Atraid,Capn1,Capn2,Ccdc115,Cd1d1,Cd63,Cd74,Clec16a,Cln3,Cln5,Ctns,Ctsb,Ctsd,Ctsl,Ctss,Cyb561a3,Dnase2a,Epdr1,Gabarap,Galc,Gba,Ggh,Gla,Glmp,Gusb,H2-Aa,H2-DMa,Hexa,Hexb,Irgm1,Itm2c,Lamp1,Lamp2,Lgmn,Lmbrd1,Lrrk2,Manba,Map1lc3b,March1,Milr1,Mt1,Neu1,Npc1,Plbd2,Ppt1,Rab12,Rab7,Rnf13,Rnf19b,Scarb2,Sidt2,Slc35f6,Sppl2a,Sqstm1,Srgn,Syt11,Tm6sf1,Tmem106b,Tpp1,Unc93b1,Vps33a,Vps36,Zc3ha…
GO:0000323	lytic vacuole	1.52e-08	5.87e-07	66	3587	Common	Abca5,Acp2,Atp6v1g1,Atraid,Capn1,Capn2,Ccdc115,Cd1d1,Cd63,Cd74,Clec16a,Cln3,Cln5,Ctns,Ctsb,Ctsd,Ctsl,Ctss,Cyb561a3,Dnase2a,Epdr1,Gabarap,Galc,Gba,Ggh,Gla,Glmp,Gusb,H2-Aa,H2-DMa,Hexa,Hexb,Irgm1,Itm2c,Lamp1,Lamp2,Lgmn,Lmbrd1,Lrrk2,Manba,Map1lc3b,March1,Milr1,Mt1,Neu1,Npc1,Plbd2,Ppt1,Rab12,Rab7,Rnf13,Rnf19b,Scarb2,Sidt2,Slc35f6,Sppl2a,Sqstm1,Srgn,Syt11,Tm6sf1,Tmem106b,Tpp1,Unc93b1,Vps33a,Vps36,Zc3ha…
GO:0030027	lamellipodium	1.52e-08	5.87e-07	56	3587	Common	Abi1,Actr3,Aif1,Ajuba,Als2,Amotl1,Arap3,Arhgap31,Arhgef6,Arpc3,Arpin,Bcar1,Capzb,Carmil1,Cdc42bpa,Cdh2,Cdk5,Cfl1,Ctnna1,Ctnnb1,Ctnnd1,Cttn,Cyfip1,Dbnl,Dysf,Enah,Evl,Fat1,Fgd1,Fgd4,Fscn1,Gsn,Hax1,Itgb1bp1,Itsn1,Limk1,Mtss1l,Myo1g,Myo9b,Nckap1,Nf2,Parva,Phactr4,Pik3ca,Plekhg5,Ptk2,Pxn,Rab13,Rac1,Rdx,Rhoa,Rock1,Twf2,Wasf2,Wasf3,Wasl
GO:0031966	mitochondrial membrane	1.68e-08	6.24e-07	138	3587	Common	Abcb10,Abcb7,Abcd3,Acaa2,Acat1,Acsl5,Afg3l1,Aifm1,Ak2,Aldh3a2,Apex2,Armcx3,Atp5b,Atp5c1,Atp5e,Atp5f1,Atp5g1,Atp5h,Atp5j,Atp5l,Bak1,Bax,Bckdhb,Bcl2l1,Bcl2l2,Bid,Bnip3,Bok,Chchd3,Cisd1,Cisd2,Clpx,Cox15,Cox4i1,Cox5a,Cox6b1,Cox6c,Cox7a2,Cox7a2l,Cpt1a,Csde1,Cyb5b,Cyb5r3,Cyp27a1,Dhrs1,Dnajc11,Dnajc15,Dnm1l,Eci1,Efhd1,Etfdh,Fech,Foxo3,Gcdh,Glud1,Got2,Gpam,Gpd2,Hadh,Hadha,Hadhb,Herc2,Hmgcl,Hsd17b10,Hspd1…
GO:0031981	nuclear lumen	2.12e-08	7.58e-07	312	3587	Common	2010111I01Rik,Aatf,Acin1,Actl6a,Adar,Add3,Aebp2,Ahctf1,Akap8,Akap8l,Alkbh1,Arid1a,Arid1b,Arid2,Ash2l,Asxl2,Atrx,Basp1,Baz1a,Baz2a,Bmi1,Brd4,Brd7,Btd,Bysl,Calcoco1,Cbx3,Cbx4,Cbx5,Ccnc,Ccnt1,Cdk8,Cebpb,Cenpc1,Cenpe,Chd3,Chd4,Ciapin1,Cpsf2,Cpsf3,Creb1,Crebbp,Crebrf,Ctc1,Ctnnb1,Ctsl,Cul2,Cxxc1,Daxx,Ddx20,Ddx39b,Ddx56,Dhx33,Dhx9,Dkc1,Dnmt3a,Dpf2,Dr1,E2f4,Eed,Eif3l,Eif6,Elob,Eloc,Emd,Ep300,Ep400,Epas1,…
GO:0044451	nucleoplasm part	2.97e-08	1.02e-06	129	3587	Common	Aebp2,Ash2l,Atrx,Basp1,Baz2a,Bmi1,Brd4,Cbx4,Cbx5,Ccnc,Ccnt1,Cdk8,Chd3,Chd4,Cpsf2,Cpsf3,Crebbp,Crebrf,Daxx,Ddx20,Ddx39b,Dkc1,Dr1,Eed,Elob,Eloc,Ep300,Ep400,Epas1,Ercc1,Etv3,Ezh1,Ezh2,Fastk,Fbl,Fip1l1,Gli3,Glis2,Hdac1,Hdac2,Hdac3,Hdac5,Hdac7,Hdac8,Hdac9,Hif1a,Hipk1,Hipk2,Hipk3,Hr,Jarid2,Kat14,Kat2a,Kat2b,Kdm6a,Mbd1,Mbd2,Mbip,Med1,Med12,Med13,Med13l,Med14,Med17,Med19,Med23,Med24,Med28,Med4,Med6,Med8,…
GO:0031252	cell leading edge	7.72e-08	2.57e-06	100	3587	Common	Abi1,Actr3,Aif1,Ajuba,Als2,Amotl1,Arap3,Arhgap1,Arhgap31,Arhgef6,Arpc2,Arpc3,Arpin,Atp6v1b2,Bcar1,Bcas3,Capzb,Carmil1,Ccdc88a,Cdc42,Cdc42bpa,Cdh2,Cdk5,Cfl1,Clasp2,Coro1a,Ctnna1,Ctnnb1,Ctnnd1,Cttn,Cyfip1,Dbnl,Dctn1,Diaph1,Dock8,Dysf,Enah,Epb41l3,Eps8,Evl,Fat1,Fgd1,Fgd4,Fgr,Fscn1,Gas7,Gsn,Hax1,Hsp90aa1,Itgb1bp1,Itgb5,Itsn1,Lcp1,Ldb1,Limk1,Lmo4,Mkln1,Mtss1l,Myo1g,Myo9b,Nckap1,Ndel1,Nf2,Parva,Pdlim7,…
GO:0005654	nucleoplasm	8.33e-08	2.68e-06	147	3587	Common	Aebp2,Ash2l,Atrx,Basp1,Baz2a,Bmi1,Brd4,Cbx4,Cbx5,Ccnc,Ccnt1,Cdk8,Chd3,Chd4,Cpsf2,Cpsf3,Crebbp,Crebrf,Daxx,Ddx20,Ddx39b,Dhx33,Dkc1,Dr1,Eed,Eif3l,Elob,Eloc,Ep300,Ep400,Epas1,Ercc1,Etv3,Ezh1,Ezh2,Fastk,Fbl,Fip1l1,Gli3,Glis2,Gnl3,Hdac1,Hdac2,Hdac3,Hdac5,Hdac7,Hdac8,Hdac9,Hif1a,Hipk1,Hipk2,Hipk3,Hr,Itpr3,Jarid2,Jmjd6,Kat14,Kat2a,Kat2b,Kdm6a,Khdrbs3,Lmnb1,Mbd1,Mbd2,Mbip,Med1,Med12,Med13,Med13l,Med14,Me…
GO:0031975	envelope	1.88e-07	5.66e-06	194	3587	Common	Abcb10,Abcb7,Abcd3,Acaa2,Acat1,Acsl5,Afg3l1,Aifm1,Ak2,Akap6,Aldh3a2,Anxa7,Apex2,Armcx3,Atp5b,Atp5c1,Atp5e,Atp5f1,Atp5g1,Atp5h,Atp5j,Atp5l,Bak1,Bax,Bche,Bckdhb,Bcl2l1,Bcl2l2,Bid,Bin1,Bnip3,Bok,Cacybp,Cbx3,Chchd3,Cidea,Cisd1,Cisd2,Clip1,Clpx,Cmtm3,Cox15,Cox4i1,Cox5a,Cox6b1,Cox6c,Cox7a2,Cox7a2l,Cpt1a,Csde1,Cyb5b,Cyb5r3,Cyhr1,Cyp27a1,Dhrs1,Dnajc11,Dnajc15,Dnm1l,Dst,Eci1,Efhd1,Emd,Ern1,Etfdh,Fech,Foxo…
GO:0031967	organelle envelope	1.88e-07	5.66e-06	194	3587	Common	Abcb10,Abcb7,Abcd3,Acaa2,Acat1,Acsl5,Afg3l1,Aifm1,Ak2,Akap6,Aldh3a2,Anxa7,Apex2,Armcx3,Atp5b,Atp5c1,Atp5e,Atp5f1,Atp5g1,Atp5h,Atp5j,Atp5l,Bak1,Bax,Bche,Bckdhb,Bcl2l1,Bcl2l2,Bid,Bin1,Bnip3,Bok,Cacybp,Cbx3,Chchd3,Cidea,Cisd1,Cisd2,Clip1,Clpx,Cmtm3,Cox15,Cox4i1,Cox5a,Cox6b1,Cox6c,Cox7a2,Cox7a2l,Cpt1a,Csde1,Cyb5b,Cyb5r3,Cyhr1,Cyp27a1,Dhrs1,Dnajc11,Dnajc15,Dnm1l,Dst,Eci1,Efhd1,Emd,Ern1,Etfdh,Fech,Foxo…
GO:1905368	peptidase complex	5.02e-07	1.47e-05	35	3587	Common	Afg3l1,Psma1,Psma2,Psma3,Psma4,Psma6,Psmb1,Psmb10,Psmb2,Psmb3,Psmb4,Psmb5,Psmb6,Psmb7,Psmb8,Psmb9,Psmc1,Psmc2,Psmc3,Psmc4,Psmc6,Psmd1,Psmd11,Psmd12,Psmd13,Psmd14,Psmd2,Psmd3,Psmd4,Psmd5,Psmd6,Psmd7,Psmd8,Psme4,Spg7
GO:0005740	mitochondrial envelope	7.22e-07	2.05e-05	143	3587	Common	Abcb10,Abcb7,Abcd3,Acaa2,Acat1,Acsl5,Afg3l1,Aifm1,Ak2,Aldh3a2,Apex2,Armcx3,Atp5b,Atp5c1,Atp5e,Atp5f1,Atp5g1,Atp5h,Atp5j,Atp5l,Bak1,Bax,Bckdhb,Bcl2l1,Bcl2l2,Bid,Bnip3,Bok,Chchd3,Cidea,Cisd1,Cisd2,Clpx,Cox15,Cox4i1,Cox5a,Cox6b1,Cox6c,Cox7a2,Cox7a2l,Cpt1a,Csde1,Cyb5b,Cyb5r3,Cyp27a1,Dhrs1,Dnajc11,Dnajc15,Dnm1l,Eci1,Efhd1,Etfdh,Fech,Foxo3,Gcdh,Glud1,Got2,Gpam,Gpd2,Hadh,Hadha,Hadhb,Herc2,Hmgcl,Hsd17b10…
GO:0031090	organelle membrane	7.49e-07	2.07e-05	270	3587	Common	Abca3,Abcb10,Abcb7,Abcd1,Abcd3,Abhd17b,Acaa2,Acat1,Acox1,Acsl5,Actn1,Afg3l1,Aifm1,Ak2,Akap6,Aldh3a2,Ankfy1,Apex2,Arl13b,Arl6ip1,Armcx3,Atg16l1,Atp13a2,Atp5b,Atp5c1,Atp5e,Atp5f1,Atp5g1,Atp5h,Atp5j,Atp5l,Atp6v0c,Atp6v1g1,Atraid,Bak1,Bax,Bcap31,Bckdhb,Bcl2l1,Bcl2l2,Bet1,Bid,Bnip3,Bok,Cat,Cav1,Cav2,Cemip,Chchd3,Cisd1,Cisd2,Clec16a,Clpx,Cltb,Cmtm3,Cox15,Cox4i1,Cox5a,Cox6b1,Cox6c,Cox7a2,Cox7a2l,Cpt1a,C…
GO:0044429	mitochondrial part	7.73e-07	2.07e-05	161	3587	Common	Abcb10,Abcb7,Abcd3,Acaa2,Acat1,Acsl5,Acss1,Afg3l1,Aifm1,Ak2,Ak3,Aldh3a2,Apex2,Armcx3,Atp5b,Atp5c1,Atp5e,Atp5f1,Atp5g1,Atp5h,Atp5j,Atp5l,Bak1,Bax,Bckdhb,Bcl2l1,Bcl2l2,Bid,Bnip3,Bok,Chchd3,Cidea,Cisd1,Cisd2,Clpx,Cox15,Cox4i1,Cox5a,Cox6b1,Cox6c,Cox7a2,Cox7a2l,Cpt1a,Cs,Csde1,Cyb5b,Cyb5r3,Cyp27a1,Dap3,Dhrs1,Dlat,Dnajc11,Dnajc15,Dnm1l,Eci1,Efhd1,Elac2,Etfa,Etfdh,Fech,Foxo3,Gcdh,Glud1,Got2,Gpam,Gpd2,Had…
GO:0043232	intracellular non-membrane-bounded organelle	1.01e-06	2.57e-05	654	3587	Common	2010111I01Rik,2700049A03Rik,Aatf,Abcc9,Abhd5,Ablim1,Acin1,Acta2,Actl6a,Actn1,Actr10,Actr2,Adam8,Adar,Add1,Add3,Aff4,Ago1,Ago2,Ago4,Ahi1,Ahnak,Aif1,Akap13,Akap8,Akap9,Aldoa,Alkbh1,Als2,Ambra1,Ank2,Ankrd1,Ankrd26,Apc,App,Arf1,Arhgap32,Arhgap35,Arhgef2,Arhgef25,Arid1a,Arid1b,Arid2,Arl13b,Arl3,Arpc1a,Arpc1b,Arpc2,Arpc3,Arpc4,Asap1,Ash2l,Aspm,Asxl2,Atf2,Atg14,Atg16l1,Atg5,Atg7,Atm,Atr,Atrx,Axin1,Bag3,…
GO:0043228	non-membrane-bounded organelle	1.01e-06	2.57e-05	654	3587	Common	2010111I01Rik,2700049A03Rik,Aatf,Abcc9,Abhd5,Ablim1,Acin1,Acta2,Actl6a,Actn1,Actr10,Actr2,Adam8,Adar,Add1,Add3,Aff4,Ago1,Ago2,Ago4,Ahi1,Ahnak,Aif1,Akap13,Akap8,Akap9,Aldoa,Alkbh1,Als2,Ambra1,Ank2,Ankrd1,Ankrd26,Apc,App,Arf1,Arhgap32,Arhgap35,Arhgef2,Arhgef25,Arid1a,Arid1b,Arid2,Arl13b,Arl3,Arpc1a,Arpc1b,Arpc2,Arpc3,Arpc4,Asap1,Ash2l,Aspm,Asxl2,Atf2,Atg14,Atg16l1,Atg5,Atg7,Atm,Atr,Atrx,Axin1,Bag3,…
GO:1905369	endopeptidase complex	1.45e-06	3.5e-05	33	3587	Common	Psma1,Psma2,Psma3,Psma4,Psma6,Psmb1,Psmb10,Psmb2,Psmb3,Psmb4,Psmb5,Psmb6,Psmb7,Psmb8,Psmb9,Psmc1,Psmc2,Psmc3,Psmc4,Psmc6,Psmd1,Psmd11,Psmd12,Psmd13,Psmd14,Psmd2,Psmd3,Psmd4,Psmd5,Psmd6,Psmd7,Psmd8,Psme4
GO:0000502	proteasome complex	1.45e-06	3.5e-05	33	3587	Common	Psma1,Psma2,Psma3,Psma4,Psma6,Psmb1,Psmb10,Psmb2,Psmb3,Psmb4,Psmb5,Psmb6,Psmb7,Psmb8,Psmb9,Psmc1,Psmc2,Psmc3,Psmc4,Psmc6,Psmd1,Psmd11,Psmd12,Psmd13,Psmd14,Psmd2,Psmd3,Psmd4,Psmd5,Psmd6,Psmd7,Psmd8,Psme4
GO:0005739	mitochondrion	2.25e-06	5.3e-05	655	3587	Common	0610009O20Rik,1110008F13Rik,1700021F05Rik,2010107E04Rik,2410015M20Rik,Abcb10,Abcb7,Abcb8,Abcd1,Abcd3,Abcf2,Abhd10,Acaa1a,Acaa2,Acaca,Acacb,Acad11,Acad8,Acad9,Acadl,Acadm,Acads,Acadsb,Acadvl,Acat1,Acly,Aco1,Aco2,Acot13,Acot9,Acox1,Acox3,Acp6,Acsf2,Acsl4,Acsl5,Acss1,Adck1,Adh1,Adh5,Adhfe1,Adprhl2,Adsl,Afg3l1,Agk,Agpat5,Agps,Agtpbp1,Aifm1,Aifm2,Ak2,Ak3,Akap1,Akap10,Akr7a5,Alas1,Aldh18a1,Aldh1l2,Aldh…
GO:0005768	endosome	4.58e-06	0.000105	123	3587	Common	Abca5,Abhd17b,Ankfy1,Anxa2,Appl1,Arf6,Arpc2,Atp6v0b,Atp6v0d1,Atp6v0d2,Atp6v1e1,Bace1,Bloc1s6,Bok,Cd1d1,Cd63,Cd74,Clcn3,Clec16a,Cln3,Commd1,Coro1a,Cyb561a3,Derl1,Derl2,Eea1,Furin,Fyn,Gpr107,H2-Ab1,H2-DMa,Hmgb1,Hspa8,Inpp5f,Irgm1,Kdr,Lamp1,Lamp2,Lamtor2,Lamtor3,Ldlrap1,Lgmn,Lrp6,Lrrk2,M6pr,Map2k1,Mapk1,Mapk3,March1,Mcoln2,Mmgt1,Nbr1,Nipa2,Nmnat2,Npc1,Nrp1,Ntrk2,Numb,Ociad1,Pank1,Ptp4a1,Ptpn1,Rab11a…
GO:0005730	nucleolus	4.95e-06	0.000111	71	3587	Common	2010111I01Rik,Aatf,Acin1,Adar,Baz2a,Btd,Bysl,Cbx5,Ciapin1,Ctsl,Cul2,Ddx56,Dhx33,Dhx9,Dkc1,Eif3l,Eri1,Exosc10,Exosc9,Fbl,Fbxw7,Gnl3,Gtf2h5,Ifi204,Ilf2,Itpr1,Itpr3,Jmjd6,Mdfic,Mki67,Mtdh,Mybbp1a,N4bp1,Ncl,Nepro,Noc3l,Nol12,Nol6,Nolc1,Npm1,Oxr1,Pak1ip1,Parp1,Parp2,Pes1,Polr1a,Polr1b,Polr1c,Pop5,Prkrip1,Pus1,Rbm19,Rbm4,Rcl1,Rev3l,Rpl11,Rpl12,Rpl23,Rpl7l1,Rrs1,Rsl1d1,Rtf1,Senp3,Snu13,Taf1a,Taf1b,Tbp,T…
GO:0015629	actin cytoskeleton	9.22e-06	0.000202	107	3587	Common	Ablim1,Acta2,Actn1,Actr10,Actr2,Adam8,Aif1,Akap13,Ankrd26,Arhgap32,Arhgap35,Arhgef2,Arpc1a,Arpc1b,Arpc2,Arpc3,Arpc4,Asap1,Bcar1,Cald1,Cap1,Capza1,Capzb,Carmil1,Cfl1,Cgnl1,Coro1a,Crk,Csrp1,Cttn,Daam1,Dbn1,Dbnl,Dctn3,Dctn6,Dst,Dstn,Dynll2,Enah,Fermt2,Fgr,Fkbp15,Flna,Flnb,Flnc,Fyn,Gabarap,Gas7,Hax1,Kat2b,Keap1,Lcp1,Lima1,Lpxn,Map3k1,Mapk8,Marcks,Med28,Mlph,Msrb1,Mtss1l,Myh10,Myh11,Myh9,Myl12b,Myl6,M…
GO:0000785	chromatin	2.81e-05	0.000603	118	3587	Common	Actl6a,Aff4,Alkbh1,Arid1a,Arid1b,Arid2,Ash2l,Asxl2,Atrx,Baz1b,Baz2a,Bmi1,Brd4,Brd7,Calcoco1,Capn2,Cbx1,Cbx3,Cbx5,Cbx7,Cebpb,Cenpc1,Chd3,Chd4,Creb1,Crebbp,Ctnnb1,Ctr9,Daxx,Dnmt1,Dnmt3a,Dpf2,E2f4,Eed,Etv3,Ezh2,Hdac1,Hdac2,Hdac5,Hmgb2,Ikzf1,Kdm1a,Kdm2a,Kdm4a,Kdm4c,Klf4,Klhdc3,Maged1,Mau2,Mbd1,Mbd2,Mbd4,Mecp2,Mef2a,Msh6,Mta2,Myocd,Nfatc2,Nfe2l2,Nipbl,Nucks1,Orc2,Pawr,Pbrm1,Phc1,Phc2,Phf10,Plcb1,Plk2,…
GO:0005794	Golgi apparatus	2.91e-05	0.00061	156	3587	Common	Abca1,Adam19,Akap9,Ap1b1,Ap1g1,Ap1m1,Ap3b1,Ap4e1,Ap4m1,Ap4s1,App,Arcn1,Arf1,Atp2c1,Atp7a,B4galt1,Bace1,Bcap31,Bcl9,Becn1,Bet1,Bicd2,Blzf1,Bok,Cav1,Cd36,Cd74,Chpt1,Clasp2,Clip3,Cltb,Copb1,Copb2,Coro7,Cul3,Dennd5a,Emp2,Ext2,Fam20a,Fam20b,Fam20c,Fbxw7,Fgd1,Fkrp,Flna,Gabarap,Gabarapl2,Gja1,Gkap1,Glg1,Gnai3,Gnptg,Golga1,Golga2,Golga3,Golga4,Golga5,Golgb1,Golm1,Golph3,Gopc,Gorasp1,Gosr1,Gosr2,Grina,H2-…
GO:0034399	nuclear periphery	3.45e-05	0.000708	24	3587	Common	Ahctf1,Akap8,Akap8l,Cebpb,Cxxc1,Eif6,Emd,Gmcl1,Lbr,Lmna,Lmnb1,Map2,Mbd1,Numa1,Pcna,Phf5a,Pml,Prkcd,Prpf40a,Psma6,Satb1,Sorbs1,Tpr,Zfp326
GO:0005925	focal adhesion	4.5e-05	0.000906	34	3587	Common	Actn1,Ajuba,Arhgap24,Arpc2,Bcar1,Cav1,Cav2,Dst,Enah,Evl,Flnb,Flrt2,Gsn,Itgb5,Lasp1,Limk1,Lims1,Lpxn,Map2k1,Mapk1,Mapk3,Myh9,Nrp1,Pak1,Parva,Peak1,Ptk2,Ptprc,Pxn,Sorbs3,Tgfb1i1,Tln1,Tns1,Vcl
GO:0005770	late endosome	8.96e-05	0.00177	37	3587	Common	Abca5,Cd1d1,Cd63,Cd74,Cln3,Cyb561a3,Derl1,Derl2,H2-Ab1,H2-DMa,Hspa8,Irgm1,Lamp1,Lamp2,Lamtor2,Lamtor3,Lgmn,M6pr,Map2k1,Mapk1,Mapk3,March1,Nbr1,Nmnat2,Rab34,Rab7,Rnf128,Rnf13,Slc31a1,Slc31a2,Slc9a6,Sppl2a,Stard3,Vps26b,Vps36,Vps41,Zc3hav1
GO:1990234	transferase complex	0.000174	0.00335	73	3587	Common	Aebp2,Anapc10,Asb2,Ash2l,Atg13,Atg14,Becn1,Bmi1,Brd4,Cacybp,Cbx5,Cbx7,Ccnd2,Ccnt1,Cdk13,Cdk2,Cdk4,Cdk6,Crebbp,Cul1,Cul2,Cul7,Dr1,Eea1,Eed,Ep300,Ercc1,Ezh1,Ezh2,Fbxo25,Fbxo4,Fbxo6,Fbxw11,Fbxw8,Hdac9,Jarid2,Kat14,Kat2a,Kat2b,Kdm6a,Klhl2,Krtcap2,Mbip,Mtf2,Otulin,Paxip1,Pigq,Pik3c3,Pik3r1,Pik3r4,Pola1,Polr1a,Polr1b,Polr1c,Prmt5,Rb1cc1,Rnf2,Setd1a,Setd5,Siah1a,Skp1a,Suz12,Tada2a,Tada3,Taf10,Taf12,Tbpl…
GO:0048475	coated membrane	0.000204	0.00378	14	3587	Common	Ap2a1,Cltc,Dab2,Eps15,Eps15l1,Necap1,Necap2,Pank1,Sec24b,Synj1,Vps11,Vps16,Vps18,Vps39
GO:0030117	membrane coat	0.000204	0.00378	14	3587	Common	Ap2a1,Cltc,Dab2,Eps15,Eps15l1,Necap1,Necap2,Pank1,Sec24b,Synj1,Vps11,Vps16,Vps18,Vps39
GO:0016604	nuclear body	0.00023	0.00419	58	3587	Common	Atrx,Basp1,Bmi1,Cbx4,Crebrf,Daxx,Ddx39b,Dkc1,Ep400,Epas1,Fastk,Fbl,Gli3,Glis2,Hdac5,Hif1a,Hipk1,Hipk2,Hipk3,Hr,Mbd1,Morc3,Mre11a,Mtor,N4bp1,Nbn,Ncor2,Noc3l,Nolc1,Npm1,Nr2c1,Nrip1,Phc1,Phf5a,Pias1,Pias2,Plcb1,Pml,Pnn,Pspc1,Rad54l2,Rnf2,Rnf6,Sart3,Senp2,Sfpq,Smc5,Smc6,Spop,Srsf3,Srsf5,Sumo3,Sympk,Tdg,Ube2i,Wbp11,Zkscan17,Zpr1
GO:0016363	nuclear matrix	0.000287	0.00505	17	3587	Common	Ahctf1,Akap8,Akap8l,Cebpb,Cxxc1,Gmcl1,Lmnb1,Mbd1,Numa1,Phf5a,Pml,Prkcd,Prpf40a,Psma6,Satb1,Sorbs1,Zfp326
GO:0022624	proteasome accessory complex	0.000287	0.00505	17	3587	Common	Psmc1,Psmc2,Psmc3,Psmc4,Psmc6,Psmd1,Psmd11,Psmd12,Psmd13,Psmd14,Psmd2,Psmd3,Psmd4,Psmd5,Psmd6,Psmd7,Psmd8
GO:0045335	phagocytic vesicle	0.000325	0.0056	36	3587	Common	Ambra1,Atg14,Becn1,Capg,Cdc42,Evl,Flnb,Fmnl1,Gsn,Irgm1,Kif16b,Kif5b,Lamp1,Lamp2,Myo18a,Myo1c,Pik3c3,Rab12,Rab34,Rab5a,Srgap2,Stx4a,Stx6,Stxbp1,Stxbp2,Stxbp3,Syk,Syt11,Unc13b,Unc93b1,Vamp3,Vamp4,Vim,Vps26b,Was,Zyx
GO:0030055	cell-substrate junction	0.000331	0.00561	40	3587	Common	Actn1,Ajuba,Arhgap24,Arpc2,Bcar1,Cav1,Cav2,Dmd,Dst,Enah,Evl,Flnb,Flrt2,Gsn,Itga6,Itga7,Itgb4,Itgb5,Lasp1,Limk1,Lims1,Lpxn,Map2k1,Mapk1,Mapk3,Myh9,Nrp1,Pak1,Parva,Peak1,Pgm5,Ptk2,Ptprc,Pxn,Sorbs1,Sorbs3,Tgfb1i1,Tln1,Tns1,Vcl
GO:0030139	endocytic vesicle	0.000404	0.00673	49	3587	Common	Ambra1,Atg14,Becn1,Capg,Cdc42,Egfr,Ehd3,Eps15,Evl,Flnb,Fmnl1,Gsn,Inpp5f,Irgm1,Itsn1,Kif16b,Kif5b,Lamp1,Lamp2,Lmbrd1,Myo18a,Myo1c,Pik3c2b,Pik3c3,Plekhg5,Rab12,Rab13,Rab34,Rab5a,Rab5b,Rab5c,Sh3kbp1,Srgap2,Stx4a,Stx6,Stxbp1,Stxbp2,Stxbp3,Syk,Syt11,Trf,Unc13b,Unc93b1,Vamp3,Vamp4,Vim,Vps26b,Was,Zyx
GO:0000407	phagophore assembly site	0.000687	0.0109	12	3587	Common	Atg12,Atg13,Atg5,Nbr1,Rab7,Rb1cc1,Sqstm1,Ulk1,Ulk2,Vmp1,Wipi1,Wipi2
GO:1903293	phosphatase complex	0.000687	0.0109	12	3587	Common	Itpr1,Ppp1r10,Ppp1r15b,Ppp2ca,Ppp2cb,Ppp2r1a,Ppp3ca,Ppp3r1,Ppp4c,Ppp4r2,Ppp4r3a,Ppp4r3b
GO:0008287	protein serine/threonine phosphatase complex	0.000687	0.0109	12	3587	Common	Itpr1,Ppp1r10,Ppp1r15b,Ppp2ca,Ppp2cb,Ppp2r1a,Ppp3ca,Ppp3r1,Ppp4c,Ppp4r2,Ppp4r3a,Ppp4r3b
GO:0001726	ruffle	0.000699	0.0109	38	3587	Common	Aif1,Als2,Arap3,Arhgap1,Atp6v1b2,Cttn,Dbnl,Diaph1,Eps8,Fgd1,Fgr,Gas7,Hsp90aa1,Itgb1bp1,Lcp1,Mkln1,Mtss1l,Myo9b,Nckap1,Nf2,Pdlim7,Pip5k1a,Plekho1,Ptprj,Rab34,Rab5a,Rac1,Rasa1,Rdx,Rhoa,Rock1,Sh2b1,Sh2b2,Src,Tnfrsf12a,Trpm7,Twf1,Wasf2
GO:0005924	cell-substrate adherens junction	0.000711	0.0109	36	3587	Common	Actn1,Ajuba,Arhgap24,Arpc2,Bcar1,Cav1,Cav2,Dst,Enah,Evl,Flnb,Flrt2,Gsn,Itga7,Itgb5,Lasp1,Limk1,Lims1,Lpxn,Map2k1,Mapk1,Mapk3,Myh9,Nrp1,Pak1,Parva,Peak1,Ptk2,Ptprc,Pxn,Sorbs1,Sorbs3,Tgfb1i1,Tln1,Tns1,Vcl
GO:0005912	adherens junction	0.000728	0.011	63	3587	Common	Actn1,Add1,Ajuba,Arhgap24,Arpc2,Bcar1,Cav1,Cav2,Cd99l2,Cdh2,Cdh5,Ctnna1,Ctnnb1,Ctnnd1,Des,Dlg1,Dlg5,Dst,Enah,Esam,Evl,Flnb,Flrt2,Frmd4b,Gja1,Gsn,Itga7,Itgb5,Jag1,Jup,Lasp1,Limk1,Lims1,Lpxn,Magi1,Map2k1,Mapk1,Mapk3,Mtss1,Myh9,Myo1e,Nectin1,Nectin2,Nectin3,Nf2,Nrp1,Pak1,Pard3,Parva,Peak1,Ptk2,Ptprc,Pxn,Shroom3,Sorbs1,Sorbs3,Sptan1,Tgfb1i1,Tjp1,Tln1,Tln2,Tns1,Vcl
GO:0005839	proteasome core complex	0.000869	0.0129	15	3587	Common	Psma1,Psma2,Psma3,Psma4,Psma6,Psmb1,Psmb10,Psmb2,Psmb3,Psmb4,Psmb5,Psmb6,Psmb7,Psmb8,Psmb9
GO:0005769	early endosome	0.000955	0.014	50	3587	Common	Anxa2,Appl1,Atp6v0d1,Atp6v0d2,Bok,Cd1d1,Cln3,Coro1a,Derl1,Derl2,Eea1,Furin,Gpr107,H2-Ab1,Hmgb1,Inpp5f,Kdr,Ldlrap1,Lrp6,Map2k1,Mapk1,Mapk3,March1,Mmgt1,Nipa2,Nrp1,Ntrk2,Numb,Ptpn1,Rab34,Rab5a,Rac1,Rcc2,Samd9l,Slc11a2,Slc9a6,Snx19,Snx20,Snx21,Tfrc,Trf,Vps11,Vps16,Vps18,Vps26a,Vps26b,Vps41,Wasf2,Washc1,Wdfy1
GO:0005774	vacuolar membrane	0.00106	0.0152	20	3587	Common	Atg16l1,Atp6v0c,Atp6v1g1,Atraid,Clec16a,Cyb561a3,Gba,H2-DMa,Lamp1,Lamp2,March1,Mtmr2,Rab7,Rnf13,Sbf2,Scarb2,Sidt2,Sppl2a,Tm6sf1,Wdfy3
GO:0044437	vacuolar part	0.00126	0.0173	22	3587	Common	Atg16l1,Atp6v0c,Atp6v1g1,Atraid,Clec16a,Cln5,Cyb561a3,Dld,Gba,H2-DMa,Lamp1,Lamp2,March1,Mtmr2,Rab7,Rnf13,Sbf2,Scarb2,Sidt2,Sppl2a,Tm6sf1,Wdfy3
GO:0005852	eukaryotic translation initiation factor 3 complex	0.00126	0.0173	11	3587	Common	Eif3a,Eif3b,Eif3c,Eif3d,Eif3e,Eif3f,Eif3h,Eif3i,Eif3k,Eif3l,Eif3m
GO:0002102	podosome	0.00126	0.0173	11	3587	Common	Adam8,Arhgef2,Asap1,Cttn,Dbnl,Lpxn,Mapk8,Ptpn12,Sh3pxd2b,Src,Vcl
GO:0012505	endomembrane system	0.00127	0.0173	519	3587	Common	Abca1,Abca3,Abca5,Abcd4,Abhd17b,Abhd2,Actn1,Adam19,Adipoq,Akap6,Akap9,Aldh3a2,Amph,Ankfy1,Ankrd27,Anxa2,Anxa7,Ap1b1,Ap1g1,Ap1m1,Ap2a1,Ap2m1,Ap3b1,Ap4e1,Ap4m1,Ap4s1,App,Appl1,Arcn1,Arf1,Arf6,Arl6ip1,Arpc2,Atp2a2,Atp2a3,Atp2c1,Atp6v0b,Atp6v0d1,Atp6v0d2,Atp6v1e1,Atp7a,B4galt1,Bace1,Bak1,Bax,Bcap31,Bche,Bcl2l1,Bcl9,Bdnf,Becn1,Bet1,Bicd2,Bin1,Bloc1s6,Blzf1,Bok,Cacna2d1,Cacybp,Cadm1,Calu,Camk2d,Canx,Ca…
GO:0000790	nuclear chromatin	0.00131	0.0176	82	3587	Common	Actl6a,Alkbh1,Arid1a,Arid1b,Arid2,Ash2l,Asxl2,Atrx,Brd4,Brd7,Calcoco1,Cbx3,Cbx5,Cebpb,Cenpc1,Chd3,Chd4,Creb1,Crebbp,Ctnnb1,Dnmt3a,Dpf2,E2f4,Eed,Etv3,Ezh2,Hdac1,Hdac2,Hdac5,Hmgb2,Kdm1a,Kdm2a,Klf4,Klhdc3,Mef2a,Msh6,Mta2,Myocd,Nfatc2,Pawr,Pbrm1,Phc1,Phf10,Plcb1,Polr2a,Polr3d,Polr3gl,Ppard,Pus1,Rarg,Rbbp7,Rif1,Rnf2,Satb1,Setd1a,Setd3,Setdb1,Sirt1,Smarca1,Smarca2,Smarca4,Smarcb1,Smarcc2,Smarcd1,Smarcd…
GO:0044440	endosomal part	0.00155	0.0205	30	3587	Common	Abhd17b,Ankfy1,Bok,Clec16a,Cyb561a3,H2-DMa,Lamp2,March1,Rab12,Rab23,Rab7,Rac1,Rap2b,Rap2c,Rcc2,Rnf13,Slc9b2,Snx19,Snx20,Snx21,Sppl2a,Tgfbrap1,Usp8,Vps11,Vps16,Vps18,Vps33a,Vps45,Vps8,Zdhhc2
GO:0000932	P-body	0.00215	0.0281	23	3587	Common	Ago1,Ago2,Ago4,Btbd1,Cnot1,Cnot3,Cnot7,Cnot9,Dcp1a,Dcp1b,Ddx6,Eif4enif1,Lsm1,Lsm14a,Pan2,Pan3,Psma2,Psma4,Psma6,Psmc2,Psmc3,Rc3h1,Xrn1
GO:0044438	microbody part	0.00232	0.0294	10	3587	Common	Abcd1,Abcd3,Acox1,Acox3,Cat,Gnpat,Pex13,Pex14,Pex16,Slc25a17
GO:0044439	peroxisomal part	0.00232	0.0294	10	3587	Common	Abcd1,Abcd3,Acox1,Acox3,Cat,Gnpat,Pex13,Pex14,Pex16,Slc25a17
GO:1902493	acetyltransferase complex	0.00259	0.0317	13	3587	Common	Crebbp,Dr1,Ep300,Kat14,Kat2a,Kat2b,Mbip,Tada2a,Tada3,Taf12,Trrap,Yeats2,Zzz3
GO:0000123	histone acetyltransferase complex	0.00259	0.0317	13	3587	Common	Crebbp,Dr1,Ep300,Kat14,Kat2a,Kat2b,Mbip,Tada2a,Tada3,Taf12,Trrap,Yeats2,Zzz3
GO:0031248	protein acetyltransferase complex	0.00259	0.0317	13	3587	Common	Crebbp,Dr1,Ep300,Kat14,Kat2a,Kat2b,Mbip,Tada2a,Tada3,Taf12,Trrap,Yeats2,Zzz3
GO:0016605	PML body	0.00273	0.033	18	3587	Common	Atrx,Daxx,Hipk1,Hipk2,Hipk3,Morc3,Mre11a,Mtor,N4bp1,Nbn,Nr2c1,Pias1,Pml,Rnf6,Senp2,Smc5,Smc6,Tdg
GO:0005776	autophagosome	0.00308	0.0367	20	3587	Common	Atg16l1,Atg5,Atg9a,Becn1,Cln3,Irgm1,Lamp1,Lamp2,Map1lc3b,Nbr1,Rab12,Rab24,Snap29,Sqstm1,Srpx,Ubqln1,Vps33a,Washc1,Wdfy3,Wipi2
GO:0030135	coated vesicle	0.00338	0.0398	24	3587	Common	1190002N15Rik,App,Arcn1,Cemip,Copb1,Dennd1a,Dvl2,Eps15,Fcho2,Furin,Gpr107,Inpp5f,Lman1,Lmbrd1,Necap1,Necap2,Pacs1,Sec23a,Sec24b,Sec31a,Slc2a4,Vps16,Yipf5,Yipf6
GO:0035097	histone methyltransferase complex	0.00363	0.0417	15	3587	Common	Aebp2,Ash2l,Cbx5,Eed,Ezh1,Ezh2,Hdac9,Jarid2,Kdm6a,Mtf2,Paxip1,Prmt5,Setd1a,Suz12,Zfp335
GO:0034708	methyltransferase complex	0.00363	0.0417	15	3587	Common	Aebp2,Ash2l,Cbx5,Eed,Ezh1,Ezh2,Hdac9,Jarid2,Kdm6a,Mtf2,Paxip1,Prmt5,Setd1a,Suz12,Zfp335
GO:1990904	ribonucleoprotein complex	0.00376	0.0428	76	3587	Common	Ago1,Ago2,Ago4,Btbd1,Caprin1,Casp8,Clock,Cnot1,Cnot3,Cnot7,Cnot9,Cpeb2,Dcp1a,Dcp1b,Ddx1,Ddx6,Dicer1,Eif2ak4,Eif2s1,Eif4e,Eif4enif1,Elavl1,Eri1,Fmr1,Fxr1,Fxr2,Gcn1l1,Impact,Khsrp,Lsm1,Lsm11,Lsm14a,Mrpl13,Mrpl51,Mrps15,Msi2,Nolc1,Npm1,Nsun2,Pan2,Pan3,Pes1,Pop5,Prmt3,Psma2,Psma4,Psma6,Psmc2,Psmc3,Ptbp2,Pum2,Rc3h1,Repin1,Rheb,Rpl19,Rpl32,Rpl38,Rpl7,Rpl7a,Rps6,Snrpb,Snu13,Srrm1,Stau1,Syncrip,Tarbp2,Td…
GO:0070062	extracellular exosome	0.00425	0.0472	9	3587	Common	Aqp1,Cd47,Cd9,Gars,Hspa8,Pdcd6ip,Slc2a4,Tfrc,Tsg101
GO:0035371	microtubule plus-end	0.00425	0.0472	9	3587	Common	Apc,Clip1,Clip2,Dctn1,Mapre1,Mapre2,Mapre3,Mlph,Myo5a
GO:0098805	whole membrane	0.00492	0.054	135	3587	Common	Abca3,Abcd1,Abcd3,Abhd17b,Acox1,Actn1,Aifm1,Ankfy1,Aqp1,Armcx3,Atg12,Atg16l1,Atg5,Atp6v0c,Atp6v1g1,Atraid,Bak1,Bax,Bcl10,Bcl2l1,Bok,Cacna1c,Cat,Cav1,Cav2,Cavin1,Cavin3,Cbl,Cd14,Cd36,Cdh2,Cemip,Cisd1,Cisd2,Clec16a,Coro1c,Ctnna1,Ctnnb1,Cyb561a3,Dag1,Dennd1a,Dlg1,Dmd,Dnm1l,Efnb1,Emp2,Eps15,Flot1,Flot2,Foxo3,Furin,Gba,Gprc5b,H2-D1,H2-DMa,Hk1,Hyal2,Icam1,Ift88,Insr,Itgb2,Jak2,Lamp1,Lamp2,Lpin1,Lrrk2,M…
GO:0042383	sarcolemma	0.00636	0.069	47	3587	Common	Abcc9,Acp1,Ahnak,Ank2,Anxa1,Anxa2,Atp1a1,Atp1a2,Atp1b1,Atp2b4,Bgn,Cacna1c,Cacna2d1,Camk2d,Cdh2,Cib1,Col6a1,Col6a2,Col6a3,Dag1,Des,Dmd,Dst,Dtna,Dysf,Fkrp,Flot1,Fxyd1,Igf1r,Itga7,Itgb1,Lama2,Lamp1,Nos1ap,Pgm5,Ppp3cb,Ppp3r1,Sgcb,Sgcd,Sgcg,Slc2a4,Snta1,Sspn,Sync,Synm,Utrn,Vcl
GO:0005881	cytoplasmic microtubule	0.00686	0.0736	16	3587	Common	Apc,Axin1,Bcas3,Clasp1,Clasp2,Clip1,Clip2,Hdac6,Map9,Mapre1,Ranbp10,Ss18,Tuba1a,Tuba1b,Tuba1c,Tubg1
GO:0044431	Golgi apparatus part	0.00693	0.0736	61	3587	Common	Ap1b1,Ap1g1,Ap1m1,Ap3b1,Ap4e1,Ap4m1,Ap4s1,Atp7a,Bace1,Bcap31,Bcl9,Becn1,Bet1,Bok,Clip3,Cltb,Flna,Gabarapl2,Glg1,Golga1,Golga2,Golga3,Golga5,Golgb1,Gosr1,Gosr2,Kdelr1,Kif13a,Limk2,Lpcat2,Lrrk2,Lypla2,Man1a,Man1a2,Man2a1,March1,Mbtps1,Nbea,Nmnat2,Pcnt,Pik3r1,Prkd1,Retreg1,Rhbdd2,Sec22b,Sec23a,Sec23ip,Slc35a2,Stx4a,Stx5a,Stx6,Tgoln1,Tjap1,Trappc3,Trappc4,Trip11,Vamp2,Vamp4,Vps45,Yipf6,Zdhhc13
GO:1990752	microtubule end	0.00758	0.0785	11	3587	Common	Apc,Camsap2,Clip1,Clip2,Dctn1,Mapre1,Mapre2,Mapre3,Mlph,Myo5a,Nin
GO:0044464	cell part	0.0078	0.0785	3312	3587	Common	0610009O20Rik,1110008F13Rik,1190002N15Rik,1700021F05Rik,2010107E04Rik,2010111I01Rik,2410015M20Rik,2410089E03Rik,2700049A03Rik,3110043O21Rik,4833439L19Rik,Aamdc,Aatf,Abca1,Abca3,Abca5,Abcb10,Abcb1a,Abcb7,Abcb8,Abcc1,Abcc3,Abcc4,Abcc9,Abcd1,Abcd3,Abcd4,Abcf2,Abhd10,Abhd12,Abhd13,Abhd17b,Abhd2,Abhd5,Abi1,Ablim1,Abr,Abraxas2,Acaa1a,Acaa2,Acaca,Acacb,Acad11,Acad8,Acad9,Acadl,Acadm,Acads,Acadsb,Acadvl,…
GO:0071541	eukaryotic translation initiation factor 3 complex, eIF3m	0.0078	0.0785	8	3587	Common	Eif3a,Eif3b,Eif3c,Eif3d,Eif3f,Eif3h,Eif3i,Eif3m
GO:0031903	microbody membrane	0.0078	0.0785	8	3587	Common	Abcd1,Abcd3,Acox1,Cat,Pex13,Pex14,Pex16,Slc25a17
GO:0005778	peroxisomal membrane	0.0078	0.0785	8	3587	Common	Abcd1,Abcd3,Acox1,Cat,Pex13,Pex14,Pex16,Slc25a17
GO:0005623	cell	0.00798	0.0794	3314	3587	Common	0610009O20Rik,1110008F13Rik,1190002N15Rik,1700021F05Rik,2010107E04Rik,2010111I01Rik,2410015M20Rik,2410089E03Rik,2700049A03Rik,3110043O21Rik,4833439L19Rik,Aamdc,Aatf,Abca1,Abca3,Abca5,Abcb10,Abcb1a,Abcb7,Abcb8,Abcc1,Abcc3,Abcc4,Abcc9,Abcd1,Abcd3,Abcd4,Abcf2,Abhd10,Abhd12,Abhd13,Abhd17b,Abhd2,Abhd5,Abi1,Ablim1,Abr,Abraxas2,Acaa1a,Acaa2,Acaca,Acacb,Acad11,Acad8,Acad9,Acadl,Acadm,Acads,Acadsb,Acadvl,…
GO:0005856	cytoskeleton	0.00857	0.0844	310	3587	Common	2700049A03Rik,Ablim1,Acta2,Actn1,Actr10,Actr2,Adam8,Add1,Add3,Ahi1,Aif1,Akap13,Akap9,Als2,Ambra1,Ankrd26,Apc,App,Arhgap32,Arhgap35,Arhgef2,Arl13b,Arl3,Arpc1a,Arpc1b,Arpc2,Arpc3,Arpc4,Asap1,Aspm,Atg14,Atg16l1,Atg5,Atg7,Atm,Axin1,Bbs4,Bbs7,Bcar1,Bcas3,Bccip,Bnip2,C2cd3,Cald1,Camsap2,Cap1,Capza1,Capza2,Capzb,Carmil1,Ccdc141,Ccdc50,Ccser2,Cdk5rap2,Cenpf,Cep120,Cep164,Cep170,Cep192,Cep250,Cep290,Cep57…
GO:0010008	endosome membrane	0.00993	0.0968	25	3587	Common	Abhd17b,Ankfy1,Bok,Clec16a,Cyb561a3,H2-DMa,Lamp2,March1,Rab12,Rab23,Rab7,Rac1,Rap2b,Rap2c,Rcc2,Rnf13,Slc9b2,Snx19,Snx20,Snx21,Sppl2a,Usp8,Vps16,Vps45,Zdhhc2
GO:0097458	neuron part	8.61e-11	4.48e-08	107	587	Mouse	Abl2,Adam22,Add2,Amigo1,Arhgap44,Bsn,Cacna1a,Cacna1b,Chl1,Clic5,Cnksr2,Cntnap1,Cobl,Crocc,Ctnna2,Ctnnd2,Dagla,Dlg2,Dlgap1,Dmtn,Dpysl5,Epha4,Ephb2,Ephb6,Fabp7,Fam206a,Fat3,Fbxo31,Fbxo45,Flrt1,Fzd3,Gap43,Gnaz,Gria1,Gria2,Igsf9,Igsf9b,Jph4,Katnb1,Kcna1,Kcna2,Kcna6,Kcnb1,Kcnc4,Kcnq3,Kif5a,L1cam,Ldlr,Mapk10,Mapk8ip2,Mapt,Mme,Mpp2,Ncam2,Nefh,Nfasc,Ngf,Ngfr,Nrcam,Nrxn1,Ntrk1,Palm,Pcdh9,Pcdhb22,Pclo,Pex5…
GO:0044456	synapse part	4.88e-09	1.27e-06	49	587	Mouse	Abl2,Add2,Arhgap44,Bsn,Cnksr2,Ctnna2,Ctnnd2,Dagla,Dlg2,Dlgap1,Dmtn,Fbxo45,Fzd3,Gap43,Gria1,Gria2,Gria3,Kcna1,Kcna2,Kcna6,Kcnc4,L1cam,Mapk10,Mapk8ip2,Mapt,Mme,Mpp2,Nefh,Ngfr,Nrxn1,Nsg1,Palm,Pclo,Ppp1r9a,Prkar2b,Prss12,Psd,Rab3b,Rab3c,Snap25,Snap47,Snap91,Ston2,Stx1a,Sv2c,Syn1,Syn2,Syngap1,Syt1
GO:0045202	synapse	1.78e-08	3.09e-06	59	587	Mouse	Abl2,Add2,Arhgap44,Bsn,Cnksr2,Ctnna2,Ctnnd2,Dagla,Dlg2,Dlgap1,Dmtn,Erc2,Fbxo45,Fzd3,Gap43,Gria1,Gria2,Gria3,Gria4,Igsf9,Igsf9b,Kcna1,Kcna2,Kcna6,Kcnc4,L1cam,Mapk10,Mapk8ip2,Mapt,Mme,Mpp2,Nefh,Ngfr,Nrcam,Nrxn1,Nsg1,Palm,Pclo,Ppfia4,Ppp1r9a,Prkar2b,Prss12,Psd,Rab3b,Rab3c,Sdk2,Slc8a3,Snap25,Snap47,Snap91,Snca,Sntb2,Ston2,Stx1a,Sv2c,Syn1,Syn2,Syngap1,Syt1
GO:0036477	somatodendritic compartment	4.52e-08	5.88e-06	52	587	Mouse	Abl2,Amigo1,Arhgap44,Bsn,Cacna1a,Cacna1b,Chl1,Cobl,Dpysl5,Epha4,Ephb2,Fabp7,Fam206a,Fat3,Fbxo31,Flrt1,Fzd3,Gnaz,Gria1,Gria2,Igsf9,Igsf9b,Jph4,Kcna1,Kcna2,Kcnb1,Kif5a,Ldlr,Mapk8ip2,Mme,Mpp2,Nrxn1,Pex5l,Ppp1r9a,Prkar2b,Prss12,Psd,Rgs7,Rit2,S100b,Sez6l2,Slc1a3,Slc4a8,Snap25,Snap47,Snca,Sptbn2,Syngap1,Syt4,Tubb3,Uchl1,Uhmk1
GO:0043005	neuron projection	1.28e-07	1.34e-05	79	587	Mouse	Abl2,Adam22,Amigo1,Arhgap44,Bsn,Cacna1a,Cacna1b,Chl1,Clic5,Cntnap1,Cobl,Ctnna2,Dagla,Dlg2,Dpysl5,Epha4,Ephb2,Fam206a,Fat3,Flrt1,Fzd3,Gap43,Gnaz,Gria1,Gria2,Igsf9,Igsf9b,Jph4,Katnb1,Kcna1,Kcna2,Kcna6,Kcnb1,Kcnc4,Kcnq3,Kif5a,L1cam,Mapt,Mme,Mpp2,Ncam2,Nefh,Nfasc,Ngf,Nrcam,Nrxn1,Ntrk1,Palm,Pcdh9,Pcdhb22,Pex5l,Ppp1r9a,Pqbp1,Prkar2b,Prom1,Prph,Prss12,Psd,Rgs7,Rit2,Scn1b,Scn2a,Slc1a3,Slc4a8,Snap25,Snap4…
GO:0097447	dendritic tree	3.75e-07	3.25e-05	37	587	Mouse	Abl2,Amigo1,Arhgap44,Bsn,Cacna1a,Cacna1b,Chl1,Cobl,Dpysl5,Epha4,Ephb2,Fam206a,Fat3,Fzd3,Gnaz,Gria1,Igsf9,Igsf9b,Jph4,Kcna1,Kcna2,Kcnb1,Kif5a,Mme,Mpp2,Pex5l,Ppp1r9a,Prkar2b,Prss12,Psd,Rgs7,Rit2,Snap47,Syngap1,Syt4,Tubb3,Uhmk1
GO:0030424	axon	4.77e-07	3.54e-05	44	587	Mouse	Adam22,Bsn,Cntnap1,Cobl,Ctnna2,Dagla,Dlg2,Epha4,Ephb2,Fzd3,Gap43,Gria1,Igsf9,Katnb1,Kcna1,Kcna2,Kcna6,Kcnc4,Kcnq3,L1cam,Mapt,Mme,Ncam2,Nefh,Nfasc,Nrcam,Nrxn1,Ntrk1,Pcdh9,Prph,Prss12,Scn1b,Scn2a,Snap25,Stmn2,Stx1a,Syn1,Syt1,Syt2,Syt4,Trim46,Tubb3,Uchl1,Uhmk1
GO:0030425	dendrite	9.4e-07	6.11e-05	36	587	Mouse	Abl2,Amigo1,Arhgap44,Bsn,Cacna1a,Cacna1b,Chl1,Cobl,Dpysl5,Epha4,Ephb2,Fam206a,Fat3,Fzd3,Gnaz,Gria1,Igsf9,Igsf9b,Jph4,Kcna1,Kcna2,Kcnb1,Kif5a,Mme,Mpp2,Pex5l,Ppp1r9a,Prkar2b,Prss12,Psd,Rgs7,Snap47,Syngap1,Syt4,Tubb3,Uhmk1
GO:0044463	cell projection part	1.5e-06	7.81e-05	84	587	Mouse	Abl2,Ak1,Amigo1,Arhgap44,Bbs1,Bsn,Cacna1a,Cacna1b,Cd24a,Cenpj,Chl1,Cntnap1,Cobl,Crocc,Cys1,Dagla,Dlg2,Dmtn,Dnah8,Dpysl5,Epb41l5,Epha4,Ephb2,Evc,Exoc8,Fam206a,Fat3,Flrt1,Fzd3,Gas8,Gli1,Gli2,Gnaz,Gpr157,Gria1,Igsf9,Igsf9b,Jph4,Kcna1,Kcna2,Kcna6,Kcnb1,Kcnc4,Kcnq3,Kif5a,L1cam,Mapt,Mme,Mosmo,Mpp2,Ndrg4,Nfasc,Ngf,Nrxn1,Pacsin1,Pcdh9,Pcdhb22,Pex5l,Ppp1r9a,Pqbp1,Prkar2b,Prom1,Prph,Prss12,Psd,Psd3,Rgs7,Sc…
GO:0120038	plasma membrane bounded cell projection part	1.5e-06	7.81e-05	84	587	Mouse	Abl2,Ak1,Amigo1,Arhgap44,Bbs1,Bsn,Cacna1a,Cacna1b,Cd24a,Cenpj,Chl1,Cntnap1,Cobl,Crocc,Cys1,Dagla,Dlg2,Dmtn,Dnah8,Dpysl5,Epb41l5,Epha4,Ephb2,Evc,Exoc8,Fam206a,Fat3,Flrt1,Fzd3,Gas8,Gli1,Gli2,Gnaz,Gpr157,Gria1,Igsf9,Igsf9b,Jph4,Kcna1,Kcna2,Kcna6,Kcnb1,Kcnc4,Kcnq3,Kif5a,L1cam,Mapt,Mme,Mosmo,Mpp2,Ndrg4,Nfasc,Ngf,Nrxn1,Pacsin1,Pcdh9,Pcdhb22,Pex5l,Ppp1r9a,Pqbp1,Prkar2b,Prom1,Prph,Prss12,Psd,Psd3,Rgs7,Sc…
GO:0098794	postsynapse	2.93e-06	0.000139	32	587	Mouse	Abl2,Add2,Arhgap44,Bsn,Cnksr2,Ctnna2,Ctnnd2,Dagla,Dlg2,Dlgap1,Dmtn,Fbxo45,Gap43,Gria1,Gria2,Gria3,Mapk10,Mapk8ip2,Mapt,Mpp2,Nefh,Ngfr,Nsg1,Palm,Pclo,Ppp1r9a,Prkar2b,Psd,Snap25,Syn1,Syn2,Syngap1
GO:0034703	cation channel complex	7.11e-06	0.000286	19	587	Mouse	Amigo1,Cacna1a,Cacna1b,Cacna1d,Cacna1g,Cacnb1,Cntnap1,Dpp6,Gria1,Gria2,Gria3,Gria4,Kcna1,Kcna2,Kcnb1,Kcnip4,Nrn1,Scn2a,Vwc2
GO:0016020	membrane	7.15e-06	0.000286	220	587	Mouse	AI464131,Abl2,Adam22,Add2,Adipor1,Adrb3,Agpat4,Ak1,Akap5,Alpl,Amigo1,Ank1,Ap3s1,Aplp1,Ar,Asah2,Aspscr1,Astn1,Astn2,Atad3a,Atp5j2,Atxn3,Azin2,B3galt1,Bcl2,Bcl2l11,Bet1l,Bsg,Cacna1a,Cacna1b,Cacna1d,Cacna1g,Cacnb1,Ccdc136,Ccr2,Cd244,Cd24a,Cd300a,Cd300c2,Cd38,Cldn12,Cldn5,Cntnap1,Cobl,Ctnna2,Cys1,Cysltr1,Dagla,Dbh,Dgkb,Dlg2,Dmtn,Doc2b,Dolpp1,Dpp6,Dsp,Efna5,Elovl6,Entpd3,Epb41l5,Epha4,Ephb2,Eppk1,Erbb…
GO:0098793	presynapse	8.46e-06	0.000293	24	587	Mouse	Bsn,Fzd3,Gria1,Gria2,Kcna1,Kcna2,Kcna6,Kcnc4,L1cam,Mme,Nrxn1,Pclo,Prss12,Rab3b,Rab3c,Snap25,Snap47,Snap91,Ston2,Stx1a,Sv2c,Syn1,Syn2,Syt1
GO:0032279	asymmetric synapse	9.57e-06	0.000293	23	587	Mouse	Add2,Bsn,Cnksr2,Ctnna2,Ctnnd2,Dlg2,Dlgap1,Dmtn,Fbxo45,Gap43,Gria1,Gria2,Mapk10,Mapk8ip2,Mapt,Nefh,Ngfr,Palm,Pclo,Psd,Syn1,Syn2,Syngap1
GO:0014069	postsynaptic density	9.57e-06	0.000293	23	587	Mouse	Add2,Bsn,Cnksr2,Ctnna2,Ctnnd2,Dlg2,Dlgap1,Dmtn,Fbxo45,Gap43,Gria1,Gria2,Mapk10,Mapk8ip2,Mapt,Nefh,Ngfr,Palm,Pclo,Psd,Syn1,Syn2,Syngap1
GO:0099572	postsynaptic specialization	9.57e-06	0.000293	23	587	Mouse	Add2,Bsn,Cnksr2,Ctnna2,Ctnnd2,Dlg2,Dlgap1,Dmtn,Fbxo45,Gap43,Gria1,Gria2,Mapk10,Mapk8ip2,Mapt,Nefh,Ngfr,Palm,Pclo,Psd,Syn1,Syn2,Syngap1
GO:0098984	neuron to neuron synapse	1.15e-05	0.000331	23	587	Mouse	Add2,Bsn,Cnksr2,Ctnna2,Ctnnd2,Dlg2,Dlgap1,Dmtn,Fbxo45,Gap43,Gria1,Gria2,Mapk10,Mapk8ip2,Mapt,Nefh,Ngfr,Palm,Pclo,Psd,Syn1,Syn2,Syngap1
GO:0042995	cell projection	3.03e-05	0.000814	112	587	Mouse	Abl2,Adam22,Ak1,Amigo1,Arhgap44,Bbs1,Bsn,Cacna1a,Cacna1b,Cd24a,Cenpj,Chl1,Clic5,Cntnap1,Cobl,Crocc,Ctnna2,Cys1,Dagla,Dlg2,Dmtn,Dnah8,Dpysl5,Epb41l5,Epha4,Ephb2,Evc,Exoc8,Fabp7,Fam206a,Fat3,Fgd2,Flrt1,Fzd3,Gap43,Gas8,Gli1,Gli2,Gnaz,Gpr157,Gpr161,Gria1,Gria2,Igsf9,Igsf9b,Jph4,Katnb1,Kcna1,Kcna2,Kcna6,Kcnb1,Kcnc4,Kcnq3,Kif5a,L1cam,Mapt,Mme,Mosmo,Mpp2,Ncam2,Ndrg4,Nefh,Nfasc,Ngf,Nrcam,Nrxn1,Ntrk1,Pacs…
GO:0120025	plasma membrane bounded cell projection	3.13e-05	0.000814	111	587	Mouse	Abl2,Adam22,Ak1,Amigo1,Arhgap44,Bbs1,Bsn,Cacna1a,Cacna1b,Cd24a,Cenpj,Chl1,Clic5,Cntnap1,Cobl,Crocc,Ctnna2,Cys1,Dagla,Dlg2,Dmtn,Dnah8,Dpysl5,Epb41l5,Epha4,Ephb2,Evc,Exoc8,Fam206a,Fat3,Fgd2,Flrt1,Fzd3,Gap43,Gas8,Gli1,Gli2,Gnaz,Gpr157,Gpr161,Gria1,Gria2,Igsf9,Igsf9b,Jph4,Katnb1,Kcna1,Kcna2,Kcna6,Kcnb1,Kcnc4,Kcnq3,Kif5a,L1cam,Mapt,Mme,Mosmo,Mpp2,Ncam2,Ndrg4,Nefh,Nfasc,Ngf,Nrcam,Nrxn1,Ntrk1,Pacsin1,Pa…
GO:0034702	ion channel complex	4.6e-05	0.00114	19	587	Mouse	Amigo1,Cacna1a,Cacna1b,Cacna1d,Cacna1g,Cacnb1,Cntnap1,Dpp6,Gria1,Gria2,Gria3,Gria4,Kcna1,Kcna2,Kcnb1,Kcnip4,Nrn1,Scn2a,Vwc2
GO:1902495	transmembrane transporter complex	5.54e-05	0.00131	19	587	Mouse	Amigo1,Cacna1a,Cacna1b,Cacna1d,Cacna1g,Cacnb1,Cntnap1,Dpp6,Gria1,Gria2,Gria3,Gria4,Kcna1,Kcna2,Kcnb1,Kcnip4,Nrn1,Scn2a,Vwc2
GO:1990351	transporter complex	7.94e-05	0.0018	19	587	Mouse	Amigo1,Cacna1a,Cacna1b,Cacna1d,Cacna1g,Cacnb1,Cntnap1,Dpp6,Gria1,Gria2,Gria3,Gria4,Kcna1,Kcna2,Kcnb1,Kcnip4,Nrn1,Scn2a,Vwc2
GO:0031224	intrinsic component of membrane	0.000132	0.0028	55	587	Mouse	Adam22,Amigo1,Aplp1,Astn1,Astn2,Cacna1a,Cacna1b,Cacna1d,Cacna1g,Cacnb1,Ccr2,Cd24a,Cntnap1,Cysltr1,Dolpp1,Dpp6,Elovl6,Epha4,Ephb2,Fitm2,Flrt1,Gpc3,Gria1,Gria2,Gria3,Gria4,Hbegf,Hhip,Htr3b,Jph3,Kcna1,Kcna2,Kcnb1,Kcnip4,Lepr,Lrmp,Ltk,Nrn1,Ntng1,Perp,Prom1,Ptch1,Ric3,Rnf180,S1pr3,Scn2a,Sema5a,Sema6a,Slc1a3,Slc4a4,Slc8a3,Stx1a,Syne3,Syt4,Vwc2
GO:0043025	neuronal cell body	0.000135	0.0028	28	587	Mouse	Amigo1,Cacna1a,Cacna1b,Cobl,Dpysl5,Ephb2,Fabp7,Fbxo31,Flrt1,Fzd3,Gria1,Igsf9b,Kcna1,Kcna2,Kcnb1,Kif5a,Mapk8ip2,Nrxn1,S100b,Sez6l2,Slc1a3,Slc4a8,Snap47,Snca,Sptbn2,Syt4,Tubb3,Uchl1
GO:0044298	cell body membrane	0.000248	0.00478	5	587	Mouse	Amigo1,Flrt1,Kcna2,Kcnb1,Slc4a8
GO:0032809	neuronal cell body membrane	0.000248	0.00478	5	587	Mouse	Amigo1,Flrt1,Kcna2,Kcnb1,Slc4a8
GO:0008021	synaptic vesicle	0.000319	0.00592	13	587	Mouse	Gria1,Gria2,Mme,Rab3b,Rab3c,Snap25,Snap47,Ston2,Stx1a,Sv2c,Syn1,Syn2,Syt1
GO:0031984	organelle subcompartment	0.00037	0.00629	29	587	Mouse	AI464131,Ap1g2,Ap3b2,Ap3s1,Atl1,B3galt1,Bcl2,Bet1l,Dolpp1,Elovl6,Fitm2,Jph3,Lmf1,Lrba,Lrmp,Nat8l,Pcsk1n,Pomk,Ptdss2,Reep1,Retsat,Rnf180,Rp9,Slc8a3,Smpd3,Snap25,Syt17,Tmem173,Ttyh1
GO:0034705	potassium channel complex	0.000382	0.00629	7	587	Mouse	Amigo1,Cntnap1,Dpp6,Kcna1,Kcna2,Kcnb1,Kcnip4
GO:0008076	voltage-gated potassium channel complex	0.000382	0.00629	7	587	Mouse	Amigo1,Cntnap1,Dpp6,Kcna1,Kcna2,Kcnb1,Kcnip4
GO:0016021	integral component of membrane	0.000387	0.00629	50	587	Mouse	Adam22,Amigo1,Aplp1,Astn1,Astn2,Cacna1a,Cacna1b,Cacna1d,Cacna1g,Cacnb1,Ccr2,Cntnap1,Cysltr1,Dolpp1,Dpp6,Elovl6,Epha4,Ephb2,Fitm2,Flrt1,Gria1,Gria2,Gria3,Gria4,Hbegf,Hhip,Htr3b,Jph3,Kcna1,Kcna2,Kcnb1,Kcnip4,Lepr,Lrmp,Ltk,Nrn1,Perp,Prom1,Ptch1,Ric3,S1pr3,Scn2a,Sema5a,Sema6a,Slc1a3,Slc4a4,Slc8a3,Stx1a,Syt4,Vwc2
GO:0070382	exocytic vesicle	0.000483	0.00762	13	587	Mouse	Gria1,Gria2,Mme,Rab3b,Rab3c,Snap25,Snap47,Ston2,Stx1a,Sv2c,Syn1,Syn2,Syt1
GO:0098827	endoplasmic reticulum subcompartment	0.000788	0.0118	19	587	Mouse	AI464131,Atl1,Bcl2,Dolpp1,Elovl6,Fitm2,Jph3,Lmf1,Lrmp,Nat8l,Pomk,Ptdss2,Reep1,Retsat,Rnf180,Rp9,Slc8a3,Tmem173,Ttyh1
GO:0044297	cell body	0.000796	0.0118	30	587	Mouse	Amigo1,Cacna1a,Cacna1b,Cobl,Dpysl5,Ephb2,Fabp7,Fbxo31,Flrt1,Fzd3,Gnaz,Gria1,Igsf9b,Kcna1,Kcna2,Kcnb1,Kif5a,Mapk8ip2,Nrxn1,Rit2,S100b,Sez6l2,Slc1a3,Slc4a8,Snap47,Snca,Sptbn2,Syt4,Tubb3,Uchl1
GO:0031045	dense core granule	0.000814	0.0118	4	587	Mouse	Scg2,Syt1,Syt4,Syt9
GO:0044425	membrane part	0.000841	0.0118	120	587	Mouse	AI464131,Abl2,Adam22,Amigo1,Aplp1,Aspscr1,Astn1,Astn2,Bcl2,Bcl2l11,Cacna1a,Cacna1b,Cacna1d,Cacna1g,Cacnb1,Ccr2,Cd244,Cd24a,Cldn12,Cntnap1,Ctnna2,Cys1,Cysltr1,Dagla,Dlg2,Dmtn,Dolpp1,Dpp6,Dsp,Elovl6,Epb41l5,Epha4,Ephb2,Eppk1,Erbb3,Evc,Faim2,Fitm2,Flrt1,Fzd3,Gfra1,Gnaz,Gpc3,Gpr157,Gria1,Gria2,Gria3,Gria4,Havcr2,Hbegf,Hhip,Hpse,Htr3b,Itga2,Jph3,Kcna1,Kcna2,Kcnb1,Kcnip4,Kit,L1cam,Ldlr,Lepr,Lmf1,Lrmp,L…
GO:0042175	nuclear outer membrane-endoplasmic reticulum membrane network	0.00116	0.0159	19	587	Mouse	AI464131,Bcl2,Dolpp1,Elovl6,Fitm2,Jph3,Lmf1,Lrmp,Nat8l,Pomk,Ptdss2,Reep1,Retsat,Rnf180,Rp9,Slc8a3,Syne3,Tmem173,Ttyh1
GO:0071944	cell periphery	0.00125	0.0165	148	587	Mouse	Abl2,Adipor1,Ak1,Akap5,Alpl,Amigo1,Ank1,Ar,Aspscr1,Astn1,Bsn,Cacna1a,Cacna1b,Cacna1d,Cacna1g,Cacnb1,Ccr2,Cd244,Cd24a,Cd300a,Cd300c2,Cldn12,Cldn5,Cntnap1,Cobl,Col10a1,Ctnna2,Cysltr1,Dagla,Dgkb,Dlg2,Dmtn,Doc2b,Dpp6,Dsp,Efna5,Entpd3,Epb41l5,Epha4,Epha5,Ephb2,Eppk1,Erbb3,Evc,Fabp7,Flrt1,Frs2,Fzd3,Fzd5,Gap43,Gnaz,Gpc3,Gpr157,Gpr176,Gria1,Gria2,Gria3,Gria4,Havcr2,Hbegf,Hhip,Hmcn2,Htr2b,Htr3b,Il15ra,Inh…
GO:0012505	endomembrane system	0.0013	0.0165	103	587	Mouse	AI464131,Ap1g2,Ap3b2,Ap3s1,Aplp1,Arf2,Astn1,Astn2,Atl1,Azin2,B3galt1,Bcl2,Bet1l,Bsg,Cacnb1,Ccdc136,Cds1,Cers6,Clcn5,Creg2,Cyp2e1,Dbh,Ddit3,Dolpp1,E2f5,Elovl6,Entpd5,Epha4,Faim2,Fgd2,Fgf7,Fitm2,Fzd5,Gas8,Gpr161,Gria1,Gria2,Havcr2,Il1b,Inpp4b,Insig1,Jph3,Jph4,Ldlr,Lmf1,Lrba,Lrmp,Mme,Mosmo,Nat8l,Nemp1,Neurl1b,Nipa1,Nrxn1,Nsg1,Ntrk1,Nup62,Pcsk1n,Perp,Phex,Pomk,Psd,Ptdss2,Ptges,Rab27b,Rab33b,Rab3b,Rab…
GO:0044306	neuron projection terminus	0.0013	0.0165	11	587	Mouse	Bsn,Flrt1,Kcna1,Kcna2,Kcna6,Kcnc4,L1cam,Mme,Ngf,Prss12,Uchl1
GO:0005789	endoplasmic reticulum membrane	0.00141	0.0175	18	587	Mouse	AI464131,Bcl2,Dolpp1,Elovl6,Fitm2,Jph3,Lmf1,Lrmp,Nat8l,Pomk,Ptdss2,Reep1,Retsat,Rnf180,Rp9,Slc8a3,Tmem173,Ttyh1
GO:0030133	transport vesicle	0.00172	0.0208	13	587	Mouse	Gria1,Gria2,Mme,Rab3b,Rab3c,Snap25,Snap47,Ston2,Stx1a,Sv2c,Syn1,Syn2,Syt1
GO:0044304	main axon	0.00214	0.0253	10	587	Mouse	Cntnap1,Dagla,Dlg2,Kcna1,Kcna2,Kcnq3,Nfasc,Scn1b,Scn2a,Trim46
GO:0031226	intrinsic component of plasma membrane	0.00233	0.0269	35	587	Mouse	Amigo1,Ccr2,Cd24a,Cntnap1,Cysltr1,Dpp6,Epha4,Ephb2,Flrt1,Gpc3,Gria1,Gria2,Gria3,Gria4,Hbegf,Hhip,Htr3b,Kcna1,Kcna2,Kcnb1,Kcnip4,Lepr,Nrn1,Ntng1,Perp,Prom1,Ptch1,S1pr3,Scn2a,Sema6a,Slc1a3,Slc4a4,Slc8a3,Stx1a,Vwc2
GO:0005886	plasma membrane	0.00259	0.0293	137	587	Mouse	Abl2,Adipor1,Ak1,Akap5,Alpl,Amigo1,Ar,Aspscr1,Astn1,Cacna1a,Cacna1b,Cacna1d,Cacna1g,Cacnb1,Ccr2,Cd244,Cd24a,Cd300a,Cd300c2,Cldn12,Cldn5,Cntnap1,Ctnna2,Cysltr1,Dagla,Dgkb,Dlg2,Dmtn,Doc2b,Dpp6,Dsp,Efna5,Entpd3,Epb41l5,Epha4,Ephb2,Eppk1,Erbb3,Evc,Flrt1,Frs2,Fzd3,Fzd5,Gap43,Gnaz,Gpc3,Gpr157,Gpr176,Gria1,Gria2,Gria3,Gria4,Havcr2,Hbegf,Hhip,Htr2b,Htr3b,Il15ra,Itga2,Itih4,Jph3,Kcna1,Kcna2,Kcnb1,Kcnip4,K…
GO:0005887	integral component of plasma membrane	0.00318	0.0352	32	587	Mouse	Amigo1,Ccr2,Cntnap1,Cysltr1,Dpp6,Epha4,Ephb2,Flrt1,Gria1,Gria2,Gria3,Gria4,Hbegf,Hhip,Htr3b,Kcna1,Kcna2,Kcnb1,Kcnip4,Lepr,Nrn1,Perp,Prom1,Ptch1,S1pr3,Scn2a,Sema6a,Slc1a3,Slc4a4,Slc8a3,Stx1a,Vwc2
GO:0031227	intrinsic component of endoplasmic reticulum membrane	0.00564	0.061	5	587	Mouse	Dolpp1,Elovl6,Fitm2,Lrmp,Rnf180
GO:0005737	cytoplasm	0.00592	0.0629	346	587	Mouse	8430408G22Rik,AI464131,Aars2,Abat,Abcd2,Abl2,Acsf3,Adck2,Afg1l,Agpat4,Ak1,Akap7,Alas2,Aldh1l1,Als2cl,Ank1,Ankrd6,Anp32e,Ap1g2,Ap3b2,Ap3s1,Aplp1,Apobec3,Ar,Arf2,Armc10,Arntl,Asah2,Aspscr1,Ass1,Astn1,Astn2,Atad3a,Atl1,Atp5j2,Atpif1,Atxn3,Azin2,B3galt1,Bcat1,Bcl2,Bcl2l11,Bet1l,Bmf,Bsg,Bsn,C1qbp,Cacna1d,Cacnb1,Camk4,Car3,Car8,Cbr4,Ccdc136,Cdc25a,Cdc42ep4,Cdr2,Cds1,Celf3,Celf4,Celf6,Cenpj,Cers6,Clcn5,…
GO:0044444	cytoplasmic part	0.0073	0.0759	268	587	Mouse	8430408G22Rik,AI464131,Aars2,Abat,Abcd2,Abl2,Acsf3,Adck2,Afg1l,Agpat4,Alas2,Aldh1l1,Als2cl,Ank1,Anp32e,Ap1g2,Ap3b2,Ap3s1,Aplp1,Arf2,Armc10,Arntl,Asah2,Aspscr1,Ass1,Astn1,Astn2,Atad3a,Atl1,Atp5j2,Atpif1,Atxn3,Azin2,B3galt1,Bcat1,Bcl2,Bcl2l11,Bet1l,Bsg,Bsn,C1qbp,Cacna1d,Cacnb1,Car3,Cbr4,Ccdc136,Cdc42ep4,Cds1,Cenpj,Cers6,Clcn5,Cmya5,Cobl,Col10a1,Coq5,Cox7b,Cox8b,Creg2,Crocc,Cycs,Cyp2e1,Cys1,Dbh,Dcak…
GO:0005581	collagen trimer	0.00784	0.078	5	587	Mouse	Col10a1,Col11a2,Col2a1,Col4a3,Col4a4
GO:0072534	perineuronal net	0.00795	0.078	2	587	Mouse	Ptprz1,Tnr
GO:0098831	presynaptic active zone cytoplasmic component	0.00795	0.078	2	587	Mouse	Bsn,Pclo
GO:0032281	AMPA glutamate receptor complex	0.00834	0.0803	6	587	Mouse	Gria1,Gria2,Gria3,Gria4,Nrn1,Vwc2
GO:0033270	paranode region of axon	0.00852	0.0805	4	587	Mouse	Cntnap1,Kcna1,Nfasc,Scn2a
GO:0044432	endoplasmic reticulum part	0.00994	0.0923	20	587	Mouse	AI464131,Atl1,Bcl2,Dolpp1,Elovl6,Fitm2,Jph3,Lmf1,Lrmp,Nat8l,Pomk,Ptdss2,Reep1,Retsat,Rnf180,Rp9,Slc8a3,Tmem173,Tor2a,Ttyh1
GO:0005739	mitochondrion	1.69e-20	7.7e-18	162	500	Rabbit	1110008L16Rik,2310061I04Rik,Aadat,Aass,Abcb6,Abhd11,Abhd6,Acad10,Acat3,Acot8,Acyp2,Adck5,Aldh5a1,Alkbh7,Amacr,Apoo,Apool,Arg2,Atp5s,Atpaf1,Bckdha,Bco2,Bcs1l,Bdh1,Bloc1s1,Bola1,Bphl,C330018D20Rik,Ccdc51,Ccdc58,Ccnb1,Cdk1,Cdk5rap1,Chchd4,Cisd3,Clybl,Cmc1,Coa6,Comtd1,Coq4,Coq7,Cox10,Cox11,Cox18,Cry1,Cryzl2,Ddit4,Dhfr,Diablo,Dus2,Echdc3,Eefsec,Endog,Etfb,Fahd2a,Fdx1,Fmc1,Fxn,Gadd45gip1,Gcat,Gls2,Glyc…
GO:0043231	intracellular membrane-bounded organelle	2.09e-09	4.78e-07	318	500	Rabbit	1110008L16Rik,2310061I04Rik,Aadat,Aass,Abcb6,Abhd11,Abhd6,Acad10,Acat3,Acd,Acot8,Acyp2,Adck5,Aimp2,Aldh5a1,Alkbh7,Alox5,Alpk3,Amacr,Ankrd37,Ap4b1,Apex1,Apob,Apoo,Apool,Arg2,Atp5s,Atpaf1,Bard1,Batf,Bckdha,Bco2,Bcs1l,Bdh1,Blm,Bloc1s1,Bola1,Bphl,Btbd18,Bub1b,C330018D20Rik,Ccdc51,Ccdc58,Ccdc86,Ccna2,Ccnb1,Cd40,Cdk1,Cdk5rap1,Cenph,Cenpu,Cerkl,Chchd4,Chek1,Chil1,Ciart,Cisd3,Clybl,Cmc1,Coa6,Coil,Comtd1,…
GO:0043227	membrane-bounded organelle	2.6e-06	0.000395	332	500	Rabbit	1110008L16Rik,2310061I04Rik,Aadat,Aass,Abcb6,Abhd11,Abhd6,Acad10,Acat3,Acd,Acot8,Acyp2,Adck5,Agtr1a,Aimp2,Aldh5a1,Alkbh7,Alox5,Alpk3,Amacr,Ankrd37,Ap4b1,Apex1,Apob,Apoo,Apool,Arg2,Atp5s,Atpaf1,Bard1,Batf,Bckdha,Bco2,Bcs1l,Bdh1,Blm,Bloc1s1,Bola1,Bphl,Btbd18,Bub1b,C1qtnf5,C330018D20Rik,Ccdc51,Ccdc58,Ccdc86,Ccna2,Ccnb1,Cd40,Cdc42ep2,Cdk1,Cdk5rap1,Cenph,Cenpu,Cerkl,Chchd4,Chek1,Chil1,Ciart,Cisd3,Clyb…
GO:0043229	intracellular organelle	1.92e-05	0.00219	359	500	Rabbit	1110008L16Rik,2310061I04Rik,Aadat,Aass,Abcb6,Abhd11,Abhd6,Acad10,Acat3,Acd,Acot8,Acyp2,Adck5,Agtr1a,Aimp2,Aldh5a1,Alkbh7,Alox5,Alpk3,Amacr,Ankrd37,Ap4b1,Apex1,Apob,Apoo,Apool,Arg2,Atat1,Atp5s,Atpaf1,Bard1,Batf,Bckdha,Bco2,Bcs1l,Bdh1,Blm,Bloc1s1,Bola1,Bora,Bphl,Btbd18,Bub1b,C1qtnf5,C330018D20Rik,Cby1,Ccdc51,Ccdc58,Ccdc86,Ccna2,Ccnb1,Cd40,Cdc42ep2,Cdca8,Cdk1,Cdk5rap1,Cenph,Cenpu,Cep89,Cerkl,Chchd4,…
GO:0005622	intracellular	5.07e-05	0.00463	411	500	Rabbit	1110008L16Rik,2310061I04Rik,Aadat,Aass,Abcb6,Abhd11,Abhd6,Abt1,Acad10,Acat3,Acd,Acot8,Acyp2,Ada,Adck5,Adcy10,Agtr1a,Aimp2,Alb,Aldh5a1,Alkbh7,Alox5,Alpk3,Amacr,Ankrd37,Ano4,Ap4b1,Apex1,Apob,Apoo,Apool,Arg2,Arl6,Atat1,Atp5s,Atpaf1,Bard1,Batf,Bckdha,Bco2,Bcs1l,Bdh1,Blm,Bloc1s1,Bloc1s2,Bloc1s4,Bola1,Bora,Bphl,Btbd18,Bub1b,C1qtnf5,C330018D20Rik,Capn3,Car2,Cby1,Ccdc51,Ccdc58,Ccdc86,Ccna2,Ccnb1,Cct6b,Cd…
GO:0044424	intracellular part	6.15e-05	0.00467	408	500	Rabbit	1110008L16Rik,2310061I04Rik,Aadat,Aass,Abcb6,Abhd11,Abhd6,Abt1,Acad10,Acat3,Acd,Acot8,Acyp2,Ada,Adck5,Adcy10,Agtr1a,Aimp2,Alb,Aldh5a1,Alkbh7,Alox5,Alpk3,Amacr,Ankrd37,Ap4b1,Apex1,Apob,Apoo,Apool,Arg2,Arl6,Atat1,Atp5s,Atpaf1,Bard1,Batf,Bckdha,Bco2,Bcs1l,Bdh1,Blm,Bloc1s1,Bloc1s2,Bloc1s4,Bola1,Bora,Bphl,Btbd18,Bub1b,C1qtnf5,C330018D20Rik,Capn3,Car2,Cby1,Ccdc51,Ccdc58,Ccdc86,Ccna2,Ccnb1,Cct6b,Cd40,Cd…
GO:0005737	cytoplasm	0.000192	0.0113	308	500	Rabbit	1110008L16Rik,2310061I04Rik,Aadat,Aass,Abcb6,Abhd11,Abhd6,Acad10,Acat3,Acot8,Acyp2,Ada,Adck5,Adcy10,Agtr1a,Alb,Aldh5a1,Alkbh7,Alox5,Amacr,Ankrd37,Ap4b1,Apex1,Apob,Apoo,Apool,Arg2,Arl6,Atp5s,Atpaf1,Batf,Bckdha,Bco2,Bcs1l,Bdh1,Blm,Bloc1s1,Bloc1s2,Bloc1s4,Bola1,Bphl,C1qtnf5,C330018D20Rik,Capn3,Car2,Ccdc51,Ccdc58,Ccna2,Ccnb1,Cct6b,Cdc42ep2,Cdk1,Cdk5rap1,Cenpu,Cep89,Cerkl,Chchd4,Chil1,Cib2,Cisd3,Ckap2…
GO:0043226	organelle	0.000198	0.0113	369	500	Rabbit	1110008L16Rik,2310061I04Rik,Aadat,Aass,Abcb6,Abhd11,Abhd6,Acad10,Acat3,Acd,Acot8,Acyp2,Adck5,Agtr1a,Aimp2,Aldh5a1,Alkbh7,Alox5,Alpk3,Amacr,Ankrd37,Ap4b1,Apex1,Apob,Apoo,Apool,Arg2,Atat1,Atp5s,Atpaf1,Bard1,Batf,Bckdha,Bco2,Bcs1l,Bdh1,Blm,Bloc1s1,Bola1,Bora,Bphl,Btbd18,Bub1b,C1qtnf5,C330018D20Rik,Cby1,Ccdc51,Ccdc58,Ccdc86,Ccna2,Ccnb1,Cd40,Cdc42ep2,Cdca8,Cdk1,Cdk5rap1,Cenph,Cenpu,Cep89,Cerkl,Chchd4,…
GO:0044444	cytoplasmic part	0.000436	0.0221	240	500	Rabbit	1110008L16Rik,2310061I04Rik,Aadat,Aass,Abcb6,Abhd11,Abhd6,Acad10,Acat3,Acot8,Acyp2,Adck5,Agtr1a,Aldh5a1,Alkbh7,Amacr,Ap4b1,Apob,Apoo,Apool,Arg2,Arl6,Atp5s,Atpaf1,Bckdha,Bco2,Bcs1l,Bdh1,Bloc1s1,Bloc1s2,Bloc1s4,Bola1,Bphl,C1qtnf5,C330018D20Rik,Capn3,Car2,Ccdc51,Ccdc58,Ccnb1,Cct6b,Cdc42ep2,Cdk1,Cdk5rap1,Cep89,Cerkl,Chchd4,Chil1,Cisd3,Ckap2,Cluap1,Clybl,Cmc1,Coa6,Comtd1,Coq4,Coq7,Cox10,Cox11,Cox18,Cr…
GO:0033017	sarcoplasmic reticulum membrane	0.000782	0.0357	5	500	Rabbit	Jph1,Klhl41,Pln,Ryr1,Ryr3
GO:0005876	spindle microtubule	0.0018	0.0748	4	500	Rabbit	Nusap1,Sept2,Spag5,Tubg2
GO:0044429	mitochondrial part	0.00232	0.0881	30	500	Rabbit	1110008L16Rik,Alkbh7,Apool,Bdh1,Bloc1s1,Ccnb1,Cdk1,Diablo,Etfb,Gadd45gip1,Gcat,Gstk1,H2-Ke6,Kmo,Mpst,Mterf2,Nnt,Noa1,Ociad2,Pde2a,Pemt,Sfxn2,Sirt5,Slc25a13,Slc25a14,Slc25a33,Slc3a1,Timm10,Timm17b,Timm9

## Sheet: Molecular_function
TermID	Term	P	Q	k	n	Query set	Gene symbols
GO:0140096	catalytic activity, acting on a protein	1.49e-13	2.55e-10	398	2150	Common	Abhd12,Abhd13,Abhd17b,Ace,Acvr1,Acvr1b,Acvr2a,Adam10,Adam17,Adam8,Adam9,Adamts1,Adamts15,Adamts2,Adamts7,Adamts9,Aebp1,Agbl5,Agtpbp1,Aph1a,Asb2,Ash1l,Ash2l,Ate1,Atg3,Atg4b,Atm,Atr,Bace1,Bckdk,Birc6,Blmh,Bmp1,Bmp2k,Bmpr1a,Bmpr1b,Bmpr2,Braf,Brd4,Btk,Btrc,Camk2d,Camk2g,Capn1,Capn2,Capns1,Carm1,Casp1,Casp2,Casp3,Casp7,Casp8,Casp9,Cbll1,Ccnd3,Cdc34,Cdk14,Cdk16,Cdk2,Cdk4,Cdk5,Cdk7,Chfr,Chuk,Clk1,Clk2,C…
GO:0003824	catalytic activity	1.89e-12	1.61e-09	926	2150	Common	Aars,Abcb1a,Abcg2,Abhd12,Abhd13,Abhd16a,Abhd17b,Abhd4,Acaa1a,Acaca,Acacb,Acadl,Acadm,Acat1,Ace,Aco1,Aco2,Acot7,Acot9,Acox1,Acox3,Acp1,Acp2,Acsl4,Acss1,Acss2,Acvr1,Acvr1b,Acvr2a,Adam10,Adam17,Adam8,Adam9,Adamts1,Adamts15,Adamts2,Adamts7,Adamts9,Adar,Adcy3,Adcy4,Adcy5,Adcy6,Adcy7,Adcy9,Adh1,Adh5,Adk,Adpgk,Adprh,Adss,Aebp1,Aga,Agap3,Agbl5,Agk,Agl,Ago2,Agpat1,Agpat5,Agtpbp1,Aifm1,Akr1a1,Akr1b3,Aldh18…
GO:0003723	RNA binding	1.89e-09	1.08e-06	137	2150	Common	2810403A07Rik,Aco1,Ago1,Ago2,Ago4,Arid5a,Atxn1,Auh,Baz2a,Cavin1,Cbx4,Cbx7,Ccnt1,Cpeb1,Cpeb2,Cpeb4,Cpsf3,Ddx1,Ddx21,Ddx5,Ddx58,Ddx60,Dhx33,Dhx36,Dhx58,Dhx9,Dicer1,Dis3l2,Dnmt1,Eef2k,Eif2ak4,Eif3a,Eif3b,Eif3c,Eif3d,Eif3e,Eif3f,Eif3h,Eif3i,Eif3k,Eif3l,Eif4e,Eif4enif1,Eif4g2,Elavl1,Ep300,Eri1,Eya1,Ezh2,Fech,Fmr1,Fxr1,Gemin5,Hmgb1,Hnrnpa2b1,Hnrnpc,Hnrnpk,Ikzf1,Ireb2,Jmjd6,Khdrbs1,Khsrp,Lrpprc,Lsm14a,M…
GO:0016301	kinase activity	6.14e-09	2.62e-06	191	2150	Common	Acvr1,Acvr1b,Acvr2a,Adk,Adpgk,Agk,Aldh18a1,Atm,Atr,Bckdk,Bmp2k,Bmpr1a,Bmpr1b,Bmpr2,Braf,Brd4,Btk,Camk2d,Camk2g,Ccnd3,Ccnh,Cdk14,Cdk16,Cdk2,Cdk4,Cdk5,Cdk6,Cdk7,Cerk,Chuk,Clk1,Clk2,Clk3,Clk4,Coasy,Col4a3bp,Csf1r,Csk,Csnk1a1,Csnk1d,Csnk1e,Dapk1,Dclk1,Ddr2,Dgka,Dguok,Dtymk,Dyrk1a,Eef2k,Egfr,Eif2ak1,Eif2ak3,Eif2ak4,Epha3,Ephb3,Ern1,Fam20c,Fgfr1,Fgfrl1,Fgr,Flt1,Fuk,Fyn,Galk1,Gk,Grk3,Gsk3a,Gsk3b,Guk1,Hi…
GO:0004672	protein kinase activity	2.65e-08	8.2e-06	150	2150	Common	Acvr1,Acvr1b,Acvr2a,Atm,Atr,Bckdk,Bmp2k,Bmpr1a,Bmpr1b,Bmpr2,Braf,Brd4,Btk,Camk2d,Camk2g,Ccnd3,Cdk14,Cdk16,Cdk2,Cdk4,Cdk5,Cdk7,Chuk,Clk1,Clk2,Clk3,Clk4,Csf1r,Csk,Csnk1a1,Csnk1d,Csnk1e,Dapk1,Dclk1,Ddr2,Dyrk1a,Eef2k,Egfr,Eif2ak1,Eif2ak3,Eif2ak4,Epha3,Ephb3,Ern1,Fam20c,Fgfr1,Fgfrl1,Fgr,Flt1,Fyn,Grk3,Gsk3a,Gsk3b,Hipk2,Hipk3,Ick,Ikbkb,Ikbke,Irak1,Irak3,Jak1,Jak2,Kdr,Limk2,Lrrk2,Lyn,Map2k1,Map2k3,Map3k1…
GO:0016772	transferase activity, transferring phosphorus-containing groups	2.88e-08	8.2e-06	209	2150	Common	Acvr1,Acvr1b,Acvr2a,Adk,Adpgk,Agk,Aldh18a1,Atm,Atr,Bckdk,Bmp2k,Bmpr1a,Bmpr1b,Bmpr2,Braf,Brd4,Btk,Camk2d,Camk2g,Ccnd3,Ccnh,Cdk14,Cdk16,Cdk2,Cdk4,Cdk5,Cdk6,Cdk7,Cept1,Cerk,Chpt1,Chuk,Clk1,Clk2,Clk3,Clk4,Coasy,Col4a3bp,Csf1r,Csk,Csnk1a1,Csnk1d,Csnk1e,Dapk1,Dclk1,Ddr2,Dgka,Dguok,Dpagt1,Dtymk,Dyrk1a,Eef2k,Egfr,Eif2ak1,Eif2ak3,Eif2ak4,Epha3,Ephb3,Ern1,Fam20c,Fgfr1,Fgfrl1,Fgr,Flt1,Fuk,Fyn,Galk1,Galt,Gk,…
GO:0016773	phosphotransferase activity, alcohol group as acceptor	1.07e-07	2.6e-05	174	2150	Common	Acvr1,Acvr1b,Acvr2a,Adk,Adpgk,Atm,Atr,Bckdk,Bmp2k,Bmpr1a,Bmpr1b,Bmpr2,Braf,Brd4,Btk,Camk2d,Camk2g,Ccnd3,Cdk14,Cdk16,Cdk2,Cdk4,Cdk5,Cdk7,Chuk,Clk1,Clk2,Clk3,Clk4,Coasy,Csf1r,Csk,Csnk1a1,Csnk1d,Csnk1e,Dapk1,Dclk1,Ddr2,Dgka,Dyrk1a,Eef2k,Egfr,Eif2ak1,Eif2ak3,Eif2ak4,Epha3,Ephb3,Ern1,Fam20c,Fgfr1,Fgfrl1,Fgr,Flt1,Fuk,Fyn,Galk1,Gk,Grk3,Gsk3a,Gsk3b,Hipk2,Hipk3,Hk1,Hk2,Ick,Ikbkb,Ikbke,Irak1,Irak3,Jak1,Jak…
GO:0016740	transferase activity	4.36e-07	9.31e-05	411	2150	Common	Acaa1a,Acat1,Acvr1,Acvr1b,Acvr2a,Adk,Adpgk,Agk,Agpat1,Agpat5,Aldh18a1,Asb2,Ash1l,Ash2l,Ate1,Atg3,Atg7,Atm,Atr,B3galnt1,B4galt1,Bckdk,Birc6,Bmp2k,Bmpr1a,Bmpr1b,Bmpr2,Braf,Brd4,Btk,Btrc,Camk2d,Camk2g,Carm1,Cbll1,Ccnd3,Ccnh,Cdc34,Cdk14,Cdk16,Cdk2,Cdk4,Cdk5,Cdk6,Cdk7,Cdkal1,Cept1,Cerk,Cers2,Cers4,Cers5,Chfr,Chpt1,Chst2,Chst3,Chsy1,Chuk,Clk1,Clk2,Clk3,Clk4,Clock,Coasy,Col4a3bp,Cpt1a,Crebbp,Crot,Cs,Csf…
GO:0004674	protein serine/threonine kinase activity	1.09e-05	0.00207	83	2150	Common	Acvr1,Acvr1b,Acvr2a,Bmpr1a,Bmpr1b,Bmpr2,Brd4,Camk2d,Camk2g,Ccnd3,Cdk16,Cdk2,Cdk4,Cdk5,Clk1,Clk2,Clk3,Clk4,Dyrk1a,Eef2k,Eif2ak3,Eif2ak4,Ern1,Fam20c,Grk3,Gsk3a,Gsk3b,Hipk2,Hipk3,Ick,Ikbkb,Ikbke,Irak3,Lrrk2,Map3k1,Map3k12,Map3k20,Map3k5,Mapk1,Mapk14,Mapk3,Mapk6,Mapk7,Mapk8,Mapkapk2,Mast2,Mink1,Mknk1,Mtor,Nek4,Nlk,Pim1,Pink1,Plk2,Plk3,Prkaa1,Prkab1,Prkab2,Prkacb,Prkag1,Prkag2,Prkca,Prkcd,Prkce,Prkci,…
GO:0003779	actin binding	3.44e-05	0.00588	60	2150	Common	Ablim1,Actn1,Ajuba,Cacnb2,Cald1,Capza1,Capzb,Cfl1,Cfl2,Coro1a,Cotl1,Ctnna1,Dbnl,Diaph1,Dstn,Eps8,Flna,Flnc,Fmnl1,Fscn1,Gas7,Impact,Lasp1,Lcp1,Mical1,Mical2,Mkl1,Mkl2,Mlph,Msrb1,Mtss1,Mtss1l,Myo5a,Myrip,Ophn1,Panx1,Parva,Phactr1,Phactr4,Pknox2,Plekhh2,Ppp1r9b,Prkce,Shroom3,Shroom4,Smtn,Syne1,Syne2,Synpo,Tlnrd1,Tmem201,Tmsb10,Tns1,Triobp,Trpm7,Twf1,Twf2,Vps16,Vps18,Ywhah
GO:0003712	transcription coregulator activity	6.16e-05	0.00955	90	2150	Common	Aebp1,Aebp2,Ajuba,Ankrd1,Arnt,Atf7ip,Bhlhe40,Brd7,Calcoco1,Carm1,Cops2,Cops5,Crebbp,Ctbp2,Ctnnb1,Daxx,Ddx5,Dmap1,Drap1,Eid1,Ep300,Gon4l,Hcfc1,Hdac1,Hdac5,Hdac7,Hdac9,Hipk2,Hr,Jmy,Kat2b,Kat5,Kdm5a,Limd1,Lmcd1,Lpin1,Lpin2,Lpxn,Maged1,Maml1,Map3k10,Med1,Meis2,Mkl1,Mkl2,Mta1,Mybbp1a,Myocd,Naca,Ncoa1,Ncoa2,Ncoa3,Ncoa6,Ncor2,Nrip1,Nsd1,Pdlim1,Per2,Pml,Pparg,Prdm16,Prmt5,Pus1,Rad54l2,Raly,Rbm39,Rybp,Sin…
GO:0019899	enzyme binding	8.26e-05	0.0117	92	2150	Common	Adam10,Akap13,Ankra2,Ankrd27,Arhgef15,Arhgef2,Arhgef9,Arrb1,Brd4,Cav2,Ccnt1,Cdk12,Cdk13,Cyth1,Cyth2,Dact1,Dennd1a,Dennd1b,Dennd4c,Dennd5a,Dhx36,Diaph1,Dnajc3,Dock10,Dock11,Dock5,Dock7,Dock8,Dock9,Elp2,Eps8,Erc1,Exoc2,Farp2,Fgr,Flna,Fmnl1,Foxo1,Gapvd1,Gclm,Gtf2i,Hspb1,Ipo9,Irs1,Itgav,Itgb1bp1,Kalrn,Ksr1,Lpin1,Madd,Mef2d,Mical1,Mlph,Mtss1l,Myrip,Nbea,Nbr1,Ncoa3,Net1,Pabpn1,Pea15a,Phactr4,Plekhg5,Pp…
GO:0008134	transcription factor binding	0.00012	0.0158	41	2150	Common	Akap8,Apbb1,Apbb2,Bhlhe40,Creg1,Ctnnb1,Drap1,Ercc1,Fkbp4,H2-Ab1,Hdac1,Hdac2,Hdac3,Hdac5,Hdac7,Hdac8,Hdac9,Hmgb2,Icmt,Klf4,Lmo4,Lpin1,Meis2,Mlxipl,Mybbp1a,Nab1,Nab2,Naca,Ncapg2,Ncoa3,Ncor1,Nfatc3,Nfatc4,Ppard,Rarg,Tcf4,Trib1,Trib2,Trim24,Trp53bp1,Uimc1
GO:0050839	cell adhesion molecule binding	0.000245	0.0298	16	2150	Common	Adam8,Ctgf,Cyr61,Dab2,Fbln5,Gpnmb,Lama5,Lamb1,Mfge8,Neo1,Nisch,Npnt,Plpp3,Thy1,Tln1,Tnn
GO:0003743	translation initiation factor activity	0.000388	0.0442	12	2150	Common	Eif3a,Eif3b,Eif3c,Eif3d,Eif3e,Eif3f,Eif3h,Eif3i,Eif3k,Eif3l,Eif4e,Eif4g2
GO:0005178	integrin binding	0.000446	0.0475	15	2150	Common	Adam8,Ctgf,Cyr61,Dab2,Fbln5,Gpnmb,Lama5,Lamb1,Mfge8,Nisch,Npnt,Plpp3,Thy1,Tln1,Tnn
GO:0005488	binding	0.000667	0.0668	1166	2150	Common	2810403A07Rik,Abi3bp,Ablim1,Acap2,Aco1,Actl6a,Actn1,Acvr1,Acvr2a,Adam10,Adam8,Adam9,Adamts1,Adamts15,Adamts5,Adar,Adgrg1,Adgrg6,Adgrl3,Adipoq,Adipor2,Aebp2,Agap3,Agbl5,Agl,Ago1,Ago2,Ago4,Agtpbp1,Ahr,Aif1,Aifm1,Aimp1,Ajuba,Akap12,Akap13,Akap8,Aldh1a3,Alkbh1,Amotl2,Angpt2,Ank2,Ankra2,Ankrd27,Anxa11,Ap2m1,Apbb1,Apbb2,Apc,App,Arf1,Arf5,Arf6,Arhgap31,Arhgef15,Arhgef2,Arhgef9,Arid1a,Arid5a,Arl2,Arl3,Ar…
GO:0044877	protein-containing complex binding	0.000739	0.0668	94	2150	Common	Abi3bp,Actn1,Adam8,Adgrg1,Ajuba,Arid1a,Bag3,Bag6,Bcap31,Bicd2,Cacnb2,Capza1,Capzb,Carmil1,Cd1d1,Cd36,Cenpe,Cetn3,Cfl1,Cfl2,Coro1a,Cpeb2,Ctgf,Ctnna1,Cyr61,Dab2,Dbnl,Dctn6,Ddr1,Ddr2,Dnajc1,Dstn,Ecm2,Eri1,Ezh2,F2r,Fam49b,Fbln5,Fcgr1,Fcgr2b,Fmnl1,Fmr1,Fscn1,Gas7,Gpnmb,H2afy,Hsd17b12,Hspa5,Igf1,Impact,Lama5,Lamb1,Lasp1,Lcp1,Lmbrd1,Lztfl1,Med1,Mfge8,Msr1,Mta3,Mtor,Mtss1,Nfe2l1,Nid1,Nipbl,Nisch,Npnt,Pan…
GO:0008092	cytoskeletal protein binding	0.000743	0.0668	116	2150	Common	Ablim1,Actn1,Agbl5,Agtpbp1,Ajuba,Apc,Arhgef2,B4galt1,Bicd2,Cacnb2,Cald1,Capza1,Capzb,Ccdc88a,Ccser2,Cep57,Cetn3,Cfl1,Cfl2,Clasp1,Clasp2,Clip1,Clip2,Coro1a,Cotl1,Ctnna1,Dbnl,Dctn1,Diaph1,Dst,Dstn,Eml1,Epb41l2,Eps8,Fez1,Flna,Flnc,Fmnl1,Fmr1,Fscn1,Fyn,Gabarap,Gas7,Gja1,Gphn,Hdac6,Hdgfl3,Hspb7,Hsph1,Impact,Kif1b,Kif3a,Ktn1,Lasp1,Lcp1,Map1a,Map1b,Map2,Map3k1,Map4,Map6,Mapre3,Mast2,Mical1,Mical2,Mkl1,M…
GO:0016787	hydrolase activity	0.00104	0.0891	324	2150	Common	Aars,Abcb1a,Abcg2,Abhd12,Abhd13,Abhd16a,Abhd17b,Abhd4,Ace,Acot7,Acot9,Acp1,Acp2,Adam10,Adam17,Adam8,Adam9,Adamts1,Adamts15,Adamts2,Adamts7,Adamts9,Adar,Adprh,Aebp1,Aga,Agap3,Agbl5,Ago2,Agtpbp1,Ampd2,Aoah,Aph1a,Arf6,Arl3,Arl4a,Asah1,Aspa,Atad1,Atf7ip,Atg4b,Atp1a1,Atp1b1,Atp2a2,Atp2c1,Atp6v0d1,Atp6v1g1,Atp7a,Atp8b1,Bace1,Bche,Blmh,Bmp1,Bpnt1,Btd,Capn1,Capn2,Capns1,Casp1,Casp2,Casp3,Casp7,Casp8,Casp…
GO:0016791	phosphatase activity	0.0012	0.0972	56	2150	Common	Acp1,Acp2,Atp1a1,Bpnt1,Ctdspl2,Dusp16,Dusp22,Dusp3,Dusp6,Eya1,Eya3,G6pc3,Impad1,Inpp4a,Inpp5b,Inpp5d,Inpp5f,Inpp5k,Lpin1,Lpin2,Mtmr1,Mtmr2,Nt5c,Nt5e,Ocrl,Pfkfb2,Plpp1,Plpp3,Ppa2,Ppm1a,Ppm1g,Ppm1m,Ppp1cb,Ppp1cc,Ppp2ca,Ppp2r1a,Ppp3ca,Ppp3cb,Ppp3r1,Ppp5c,Pten,Ptp4a1,Ptpn11,Ptpn12,Ptpn2,Ptpn6,Ptpn7,Ptprc,Ptprj,Ptprk,Ptpro,Sgpp1,Synj1,Synj2,Tigar,Ubash3b
