# Supplementary material for: Transcriptomics as Precision Medicine to Classify <em>In Vivo</em> Models of Dietary-Induced Atherosclerosis at Cellular and Molecular Levels
Source: Preprints.org preprint supplement (doi:10.20944/preprints201809.0082.v1), 2018-09-05
Supplement: Supplementary file 23 [file Supplemental_Table_7.xlsx]

## Sheet: Mammalian_phenotype
TermID	Term	P	Q	k	n	Qset	Gene symbols
MP:0010769	abnormal survival	2.78e-106	2.4e-102	2395	4421	Common	2700049A03Rik,4930453N24Rik,4932438A13Rik,4933427D14Rik,Aars,Aatf,Abca1,Abca3,Abca5,Abcb10,Abcb1a,Abcb7,Abcc9,Abce1,Abcf1,Abhd16a,Abhd5,Abi1,Abi3bp,Acaca,Acadl,Acadm,Acadvl,Acan,Acbd3,Ace,Ackr3,Acly,Aco1,Acsl4,Acss1,Actl6a,Actr3,Actr8,Acvr1,Acvr1b,Acvr2a,Acvrl1,Adam10,Adam12,Adam17,Adam19,Adamts1,Adamts9,Adar,Adarb1,Adcy3,Adcy7,Adcy9,Add1,Adgra2,Adgrf5,Adgrg6,Adgrl2,Adk,Adm,Adsl,Aebp1,Aebp2,Aff1,…
MP:0010770	preweaning lethality	2.04e-95	8.82e-92	2139	4421	Common	2700049A03Rik,4932438A13Rik,4933427D14Rik,Aars,Aatf,Abca1,Abca3,Abcb10,Abcb7,Abcc9,Abce1,Abcf1,Abhd16a,Abhd5,Abi1,Abi3bp,Acaca,Acadl,Acadm,Acan,Acbd3,Ace,Ackr3,Acly,Aco1,Acsl4,Actl6a,Actr3,Actr8,Acvr1,Acvr1b,Acvr2a,Acvrl1,Adam10,Adam12,Adam17,Adam19,Adamts1,Adamts9,Adar,Adarb1,Adcy3,Adcy7,Adcy9,Add1,Adgra2,Adgrg6,Adgrl2,Adk,Adm,Adsl,Aebp1,Aebp2,Aff1,Aff4,Agap1,Aggf1,Agl,Ago2,Agpat1,Agps,Ahctf1,Ah…
MP:0010768	mortality/aging	1.78e-91	5.13e-88	2579	4421	Common	2700049A03Rik,4930453N24Rik,4932438A13Rik,4933427D14Rik,Aars,Aatf,Abca1,Abca3,Abca5,Abcb10,Abcb1a,Abcb7,Abcc1,Abcc10,Abcc4,Abcc9,Abce1,Abcf1,Abhd16a,Abhd5,Abi1,Abi3bp,Acaca,Acadl,Acadm,Acadvl,Acan,Acbd3,Ace,Ackr3,Acly,Aco1,Acsl4,Acss1,Actl6a,Actr3,Actr8,Acvr1,Acvr1b,Acvr2a,Acvrl1,Adam10,Adam12,Adam17,Adam19,Adamts1,Adamts9,Adar,Adarb1,Adcy3,Adcy7,Adcy9,Add1,Adgra2,Adgre5,Adgrf5,Adgrg6,Adgrl2,Adh1…
MP:0002080	prenatal lethality	1.88e-87	4.05e-84	1316	4421	Common	2700049A03Rik,4933427D14Rik,Aars,Aatf,Abca1,Abca3,Abcb10,Abcb7,Abce1,Abcf1,Abhd16a,Abi1,Acaca,Acadl,Acly,Aco1,Actl6a,Actr3,Actr8,Acvr1,Acvr1b,Acvr2a,Acvrl1,Adam10,Adam17,Adamts9,Adar,Adcy7,Add1,Adgra2,Adgrg6,Adgrl2,Adm,Adsl,Aebp1,Aebp2,Aff4,Aggf1,Ago2,Ahctf1,Aifm1,Akap10,Akap13,Akirin2,Alas1,Alg5,Ambra1,Amd1,Anapc4,Angptl4,Ank3,Ankfy1,Ankrd11,Anks6,Anxa7,Ap1g1,Ap1m1,Ap2m1,Apaf1,Apbb2,Apc,Aph1a,Ap…
MP:0008762	embryonic lethality	2.08e-69	3.59e-66	1025	4421	Common	2700049A03Rik,4933427D14Rik,Aars,Aatf,Abcb10,Abcb7,Abce1,Abcf1,Abi1,Acaca,Acly,Actl6a,Actr3,Actr8,Acvr1,Acvr1b,Acvr2a,Acvrl1,Adam10,Adamts9,Adar,Adgrg6,Adm,Adsl,Aebp2,Aff4,Aggf1,Ago2,Ahctf1,Aifm1,Akap10,Akap13,Akirin2,Alas1,Alg5,Ambra1,Amd1,Anapc4,Ankfy1,Ankrd11,Anxa7,Ap1g1,Ap1m1,Ap2m1,Apbb2,Apc,Aph1a,Aplp2,Arap3,Arf1,Arfgef2,Arhgap29,Arid1a,Arid2,Arid4b,Arih2,Arl13b,Armc5,Arnt,Arpc3,Arrdc3,Asah1…
MP:0005621	abnormal cell physiology	1.24e-37	1.79e-34	1629	4421	Common	2700049A03Rik,Aars,Aatf,Abca1,Abcb10,Abcc9,Abcg2,Abhd2,Abhd5,Acacb,Acads,Acadvl,Acp1,Acss1,Actl6a,Acvr1,Acvr1b,Adam10,Adam17,Adam8,Adam9,Adamts7,Adar,Adcy3,Adgrg1,Adgrg6,Adipoq,Adm,Aebp1,Aggf1,Ago2,Ago4,Ahctf1,Ahi1,Ahr,Aifm1,Aifm2,Aimp1,Ajuba,Akap6,Akr1a1,Akt3,Aldh2,Aldh3a2,Alg2,Alkbh1,Alkbh5,Alms1,Ambra1,Angpt2,Angptl2,Ank,Ank2,Antxr1,Antxr2,Anxa1,Anxa7,Anxa8,Ap1b1,Ap1s2,Ap2m1,Ap3b1,Apaf1,Apbb1,…
MP:0002127	abnormal cardiovascular system morphology	1.4e-35	1.72e-32	1079	4421	Common	2700049A03Rik,4933434E20Rik,Aars,Abca1,Abca3,Abca5,Abcb8,Abcc9,Abhd5,Abi1,Acacb,Acadl,Acadm,Acadvl,Acan,Ace,Ackr3,Acsl4,Acsl5,Acta2,Acvr1,Acvrl1,Adam10,Adam15,Adam17,Adam19,Adam9,Adamts12,Adamts6,Adamts7,Adamts9,Adcy9,Adgra2,Adgrg6,Adgrl3,Adh5,Adipoq,Adm,Adsl,Aebp1,Aggf1,Ago2,Ahr,Aifm1,Akap12,Akap13,Akap6,Amotl2,Angpt2,Angptl4,Ank,Ankrd1,Ankrd26,Anks6,Anpep,Antxr2,Anxa1,Anxa2,Anxa3,Ap1b1,Ap1g1,Ap…
MP:0004196	abnormal prenatal growth/weight/body size	2.26e-35	2.43e-32	648	4421	Common	4933427D14Rik,Aatf,Abca1,Abcb7,Abi1,Acaca,Acvr1,Acvr1b,Acvr2a,Acvrl1,Adam10,Adam17,Adar,Aff4,Ago2,Aifm1,Akap10,Akap13,Alas1,Alkbh1,Anapc4,Ankrd11,Anks6,Ano6,Apc,Aph1a,Aplp2,Arap3,Arhgap1,Arhgap35,Arid1a,Arih2,Arl8b,Arnt,Atmin,Atp2a2,Atp2c1,Atp7a,Atrx,Axin1,B4galt5,Bap1,Baz1b,Bcar1,Becn1,Bicral,Birc6,Bmp4,Bmper,Bmpr1a,Bmpr2,Bptf,Braf,Brca2,Brd1,Brd2,Brd4,Brd7,Brpf1,Btaf1,C1galt1c1,C3,C330007P06Rik…
MP:0005380	embryo phenotype	1.3e-34	1.25e-31	980	4421	Common	2700049A03Rik,4933427D14Rik,4933434E20Rik,Aatf,Abca1,Abcb10,Abcb7,Abi1,Acaca,Actr3,Acvr1,Acvr1b,Acvr2a,Acvrl1,Adam10,Adam17,Adamts9,Adar,Adcy9,Adgra2,Adm,Aff4,Aggf1,Ago2,Ahctf1,Aifm1,Akap10,Akap13,Alas1,Aldh1a3,Alg5,Alkbh1,Ambra1,Amd1,Anapc4,Ankrd11,Anks6,Apaf1,Apc,Aph1a,Aplp2,Arap3,Arhgap1,Arhgap29,Arhgap35,Arid1a,Arih2,Arl13b,Arl8b,Armc5,Arnt,Arpc3,Ash1l,Ate1,Atf2,Atg16l1,Atmin,Atp11a,Atp1a2,At…
MP:0005384	cellular phenotype	7.51e-34	6.48e-31	1869	4421	Common	2700049A03Rik,Aars,Aatf,Abca1,Abcb10,Abcb7,Abcc5,Abcc9,Abcd3,Abcg2,Abhd2,Abhd5,Acacb,Acad8,Acads,Acadvl,Acox1,Acp1,Acp2,Acss1,Actl6a,Acvr1,Acvr1b,Acvr2a,Adam10,Adam17,Adam8,Adam9,Adamts2,Adamts7,Adar,Adcy3,Adgrf5,Adgrg1,Adgrg2,Adgrg6,Adipoq,Adipor2,Adm,Aebp1,Aff4,Aga,Agfg1,Aggf1,Ago2,Ago4,Agps,Agtpbp1,Ahctf1,Ahi1,Ahr,Aifm1,Aifm2,Aimp1,Ajuba,Akap6,Akap9,Akr1a1,Akt3,Aldh2,Aldh3a2,Alg2,Alkbh1,Alkbh5…
MP:0013293	embryonic lethality prior to tooth bud stage	2.66e-32	2.08e-29	506	4421	Common	4933427D14Rik,Aars,Aatf,Abcb7,Abce1,Abcf1,Acaca,Acly,Actr3,Actr8,Acvr1,Acvr1b,Adamts9,Adar,Adsl,Aggf1,Ago2,Ahctf1,Akap10,Alas1,Alg5,Amd1,Anapc4,Ap1g1,Ap2m1,Apbb2,Apc,Arf1,Arfgef2,Arhgap29,Arid1a,Arih2,Arpc3,Ascc2,Ash2l,Atoh8,Atp2a2,Atp5b,Atp5e,Atp5l,Atp6v0a1,Atp6v0c,Atp6v0d1,Atp6v1b2,Atp6v1d,Atr,Atxn10,B3galnt1,B3gat3,B3gnt5,Bap1,Becn1,Bmp4,Bmpr1a,Bmpr2,Bptf,Braf,Brca2,Btf3,Bub3,Bysl,Caml,Capn2,C…
MP:0013292	embryonic lethality prior to organogenesis	2.56e-30	1.84e-27	463	4421	Common	4933427D14Rik,Aars,Aatf,Abcb7,Abce1,Abcf1,Acaca,Acly,Actr3,Actr8,Acvr1,Acvr1b,Adamts9,Adar,Adsl,Aggf1,Ago2,Ahctf1,Alas1,Alg5,Amd1,Anapc4,Ap1g1,Ap2m1,Apc,Arf1,Arfgef2,Arhgap29,Arid1a,Arpc3,Ascc2,Ash2l,Atoh8,Atp2a2,Atp5b,Atp5e,Atp5l,Atp6v0a1,Atp6v0c,Atp6v0d1,Atp6v1b2,Atp6v1d,Atr,Atxn10,B3galnt1,B3gat3,B3gnt5,Bap1,Becn1,Bmp4,Bmpr1a,Bmpr2,Bptf,Braf,Brca2,Btf3,Bub3,Bysl,Caml,Capn2,Capn5,Casp8ap2,Ccdc1…
MP:0002088	abnormal embryonic growth/weight/body size	4.92e-30	3.26e-27	541	4421	Common	4933427D14Rik,Aatf,Abca1,Abcb7,Abi1,Acaca,Acvr1,Acvr1b,Acvr2a,Acvrl1,Adam10,Adar,Aff4,Ago2,Aifm1,Akap10,Akap13,Alas1,Anapc4,Ankrd11,Apc,Aph1a,Aplp2,Arap3,Arhgap1,Arhgap35,Arid1a,Arih2,Arl8b,Arnt,Atp2a2,Atp2c1,Atp7a,Atrx,Axin1,B4galt5,Bap1,Bcar1,Becn1,Bicral,Bmp4,Bmpr1a,Bmpr2,Bptf,Braf,Brca2,Brd1,Brd2,Brd4,Btaf1,C1galt1c1,C330007P06Rik,Casc3,Casp8,Cc2d2a,Ccdc134,Ccm2,Ccnc,Cdc42,Cdc73,Cdh2,Cdh5,Cdk…
MP:0002925	abnormal cardiovascular development	1.79e-29	1.11e-26	466	4421	Common	2700049A03Rik,4933434E20Rik,Abcc9,Abi1,Ackr3,Acvr1,Acvrl1,Adam10,Adam19,Adamts12,Adamts7,Adcy9,Adgra2,Adgrg6,Adm,Aggf1,Ahr,Akap13,Angpt2,Angptl4,Anxa1,Anxa2,Apc,Aph1a,Arap3,Arhgef15,Arid1a,Arid2,Arnt,Ate1,Atg16l1,Atmin,Atp11a,Atp2a2,Atp7a,Axin1,B4galt1,Bcar1,Bcor,Becn1,Birc6,Bmp4,Bmpr1a,Bmpr2,Braf,Brd2,C2cd3,Cacna1c,Capn2,Capns1,Casp8,Cav2,Cc2d2a,Ccdc134,Ccdc88a,Ccl2,Ccm2,Cd44,Cd47,Cd82,Cdh2,Cdh5…
MP:0006207	embryonic lethality during organogenesis	7.26e-28	4.18e-25	491	4421	Common	2700049A03Rik,Abcb10,Abi1,Acaca,Acvr1,Acvr1b,Acvr2a,Acvrl1,Adam10,Adamts9,Adar,Adgrg6,Adm,Aff4,Aifm1,Akap13,Akirin2,Ambra1,Ankrd11,Anxa7,Ap1m1,Apc,Aph1a,Arap3,Arid1a,Arid2,Arl13b,Arnt,Atp2a2,Atp2c1,Atp6v1h,Atp7a,Atrx,Axin1,B4galt5,B4gat1,Bag1,Bap1,Bbs4,Bcar1,Bcor,Becn1,Bicral,Bmp4,Bmpr1a,Bmpr2,Bptf,Braf,Brca2,Brd1,Brd2,Brpf1,C1galt1c1,C2cd3,Cabin1,Cacnb2,Capns1,Casc3,Casp8,Ccdc134,Ccm2,Ccnc,Cdh2,…
MP:0000266	abnormal heart morphology	6.92e-27	3.73e-24	797	4421	Common	2700049A03Rik,4933434E20Rik,Aars,Abca1,Abca5,Abcb8,Abcc9,Abhd5,Abi1,Acacb,Acadl,Acadm,Acadvl,Acan,Ace,Ackr3,Acsl4,Acsl5,Acvr1,Acvrl1,Adam10,Adam17,Adam19,Adamts6,Adamts9,Adcy9,Adgrg6,Adgrl3,Adh5,Adipoq,Adm,Ago2,Ahr,Aifm1,Akap12,Akap13,Akap6,Ankrd1,Ankrd26,Anks6,Ap2b1,Ap4e1,Apc,Aph1a,Arhgef1,Arhgef15,Arid1a,Arid1b,Arid2,Asl,Asxl2,Ate1,Atg16l1,Atg5,Atmin,Atp11a,Atp1a2,Atp1b1,Atp2a2,Atp6ap2,Atr,Atrx…
MP:0011100	preweaning lethality, complete penetrance	1.23e-26	6.22e-24	497	4421	Common	4932438A13Rik,4933427D14Rik,Abca1,Acbd3,Ace,Ackr3,Actr8,Acvr1,Acvr1b,Adar,Adgrg6,Adm,Adsl,Alg2,Anapc13,Anapc4,Ankrd11,Anks6,Arih2,Armh3,Arpc3,Ascc2,Ash1l,Atg3,Atl2,Atp11a,Atp1a1,Atp2a2,Atp5b,Atp5e,Atp5f1,Atp5l,Atp6v0a1,Atp6v1b2,Atp6v1d,Atp7a,Atr,Atxn10,Atxn7l3,B4galt5,B4gat1,Bag3,Bap1,Bcl7a,Bclaf1,Bmpr1a,Bms1,Cacna1c,Cald1,Carm1,Cbx4,Cdc123,Cdc26,Cdipt,Cdk5rap3,Cdk8,Cds2,Cenpe,Cep164,Cep97,Cfl1,C…
MP:0001614	abnormal blood vessel morphology	5.03e-26	2.41e-23	663	4421	Common	4933434E20Rik,Abca3,Abca5,Abcc9,Abi1,Acadm,Ace,Ackr3,Acta2,Acvr1,Acvrl1,Adam10,Adam15,Adam17,Adam19,Adam9,Adamts12,Adamts7,Adcy9,Adgra2,Adipoq,Adm,Adsl,Aebp1,Aggf1,Ahr,Amotl2,Angpt2,Angptl4,Ank,Anks6,Anpep,Antxr2,Anxa1,Anxa2,Anxa3,Ap1b1,Ap1g1,Ap2b1,Aph1a,Arap3,Arhgef1,Arhgef15,Arid1a,Arid2,Arnt,Ate1,Atf2,Atg16l1,Atmin,Atp11a,Atp2a2,Atp7a,B4galt1,Bach1,Baz1b,Bbs4,Bcam,Bcar1,Birc6,Bmp4,Bmper,Bmpr1a…
MP:0011098	embryonic lethality during organogenesis, complete penetrance	8.37e-26	3.8e-23	401	4421	Common	2700049A03Rik,Abcb10,Abi1,Acvr1,Acvr1b,Acvrl1,Adam10,Adamts9,Adar,Adgrg6,Adm,Aifm1,Akap13,Akirin2,Ankrd11,Anxa7,Ap1m1,Apc,Aph1a,Arap3,Arid1a,Arid2,Arl13b,Arnt,Atp2a2,Atp2c1,Atp6v1h,Atp7a,Atrx,Axin1,B4galt5,B4gat1,Bag1,Bap1,Bcar1,Bcor,Bicral,Bmp4,Bmpr1a,Bmpr2,Bptf,Braf,Brca2,Brd2,Brpf1,C1galt1c1,C2cd3,Cabin1,Cacnb2,Capns1,Casc3,Casp8,Ccdc134,Ccm2,Ccnc,Cdh2,Cdh5,Cep120,Cflar,Chd7,Chm,Chmp5,Cnbp,Col…
MP:0005378	growth/size/body region phenotype	1.48e-25	6.39e-23	2016	4421	Common	2610301B20Rik,2700049A03Rik,4930453N24Rik,4933427D14Rik,4933434E20Rik,Aars,Aatf,Abca1,Abcb1a,Abcb7,Abcc10,Abcc4,Abcc9,Abhd16a,Abhd5,Abi1,Acaca,Acacb,Acadvl,Acan,Ace,Acot13,Acot7,Acox1,Acp1,Acp2,Acsl3,Acsl4,Acss1,Acvr1,Acvr1b,Acvr2a,Acvrl1,Adam10,Adam17,Adamts1,Adamts2,Adamts6,Adar,Adarb1,Adcy3,Add1,Adgra2,Adgrf5,Adgrg6,Adh1,Adipoq,Adipor2,Adk,Adpgk,Aebp1,Aebp2,Afap1l2,Aff1,Aff4,Aga,Ago1,Ago2,Agtp…
MP:0014134	abnormal embryo morphology	4.41e-25	1.81e-22	726	4421	Common	2700049A03Rik,4933427D14Rik,4933434E20Rik,Aatf,Abca1,Abcb7,Abi1,Acaca,Actr3,Acvr1,Acvr1b,Acvr2a,Acvrl1,Adam10,Adam17,Adamts9,Adar,Adcy9,Adgra2,Ago2,Ahctf1,Aifm1,Akap10,Akap13,Aldh1a3,Alkbh1,Ambra1,Anapc4,Ankrd11,Anks6,Apaf1,Apc,Aph1a,Arap3,Arhgap1,Arhgap29,Arhgap35,Arid1a,Arih2,Arl13b,Arl8b,Armc5,Arnt,Arpc3,Atmin,Atp11a,Atp2a2,Atp2c1,Atp6v0c,Atp7a,Atrx,Axin1,B4galt5,Baz1b,Bbs4,Bcl10,Bcor,Becn1,Bi…
MP:0005397	hematopoietic system phenotype	8.77e-25	3.44e-22	1709	4421	Common	2310022B05Rik,4933434E20Rik,Abca1,Abca6,Abcb10,Abcb1a,Abcc1,Abcc10,Abcc4,Abcd1,Abcg2,Abhd12,Abhd16a,Abhd5,Abraxas2,Abtb2,Acaa1a,Acaca,Acbd5,Ace,Ackr3,Aco1,Acp2,Acsf2,Acsl3,Acsl4,Acsl5,Actl6a,Acvrl1,Adam10,Adam17,Adam8,Adamts6,Adamts7,Adar,Adcy9,Add1,Adgre5,Adgrf5,Adh5,Adipoq,Adm,Adpgk,Aff1,Aff4,Agap1,Ago2,Agpat1,Agtpbp1,Ahcyl1,Ahnak,Ahr,Aif1,Aimp1,Akap11,Akap12,Akap13,Akap9,Akna,Akr1a1,Aldh2,Aldh…
MP:0001672	abnormal embryo development	1.3e-24	4.86e-22	551	4421	Common	2700049A03Rik,Aatf,Abca1,Abcb7,Abi1,Acaca,Actr3,Acvr1,Acvr1b,Acvr2a,Acvrl1,Adamts9,Adar,Aff4,Ago2,Aifm1,Akap13,Alas1,Alg5,Amd1,Anapc4,Ankrd11,Apc,Aph1a,Aplp2,Arap3,Arhgap35,Arid1a,Arl13b,Armc5,Arnt,Ate1,Atp2c1,Atp6ap1,Atp6v0c,Atrx,Axin1,Bap1,Bcar1,Bcor,Becn1,Bicral,Bmp4,Bmper,Bmpr1a,Bmpr2,Bptf,Braf,Brca2,Brd1,Brd2,Brd4,Brpf1,Btaf1,C1galt1c1,C2cd3,C330007P06Rik,Capn2,Casc3,Cc2d2a,Ccm2,Ccnc,Cdh2,Cd…
MP:0010866	abnormal prenatal body size	9.29e-24	3.34e-21	479	4421	Common	4933427D14Rik,Aatf,Abca1,Acaca,Acvr1,Acvr1b,Acvr2a,Adam10,Adam17,Adar,Aifm1,Akap10,Alkbh1,Anapc4,Ankrd11,Ano6,Apc,Aph1a,Arap3,Arhgap1,Arhgap35,Arid1a,Arih2,Arl8b,Arnt,Atmin,Atp2a2,Atp2c1,Atp7a,Atrx,Axin1,B4galt5,Baz1b,Becn1,Birc6,Bmper,Bmpr1a,Bptf,Braf,Brca2,Brd2,Brd7,C3,Cadm1,Caprin1,Carm1,Casc3,Casp8,Cc2d2a,Ccdc134,Cdc42,Cdc73,Cdk4,Cfl1,Chd2,Chmp5,Chrd,Ciapin1,Ckap4,Cluh,Cnbp,Cntrl,Col27a1,Col4…
MP:0005385	cardiovascular system phenotype	1.05e-23	3.62e-21	1357	4421	Common	2700049A03Rik,4933434E20Rik,Aars,Abca1,Abca3,Abca5,Abcb10,Abcb1a,Abcb7,Abcb8,Abcc4,Abcc9,Abhd2,Abhd5,Abi1,Acacb,Acadl,Acadm,Acadvl,Acan,Ace,Ackr3,Acp1,Acsl4,Acsl5,Acta2,Actr8,Acvr1,Acvrl1,Adam10,Adam15,Adam17,Adam19,Adam9,Adamts12,Adamts6,Adamts7,Adamts9,Adar,Adcy6,Adcy9,Add3,Adgra2,Adgrg6,Adgrl3,Adh5,Adipoq,Adm,Adsl,Aebp1,Aggf1,Ago2,Agpat1,Agtrap,Ahr,Aif1,Aifm1,Akap10,Akap12,Akap13,Akap6,Alkbh1,…
MP:0010865	prenatal growth retardation	2.31e-22	7.67e-20	368	4421	Common	Abca1,Abcb7,Abi1,Acaca,Acvrl1,Adar,Aff4,Ago2,Aifm1,Akap13,Alas1,Alkbh1,Anapc4,Anks6,Aplp2,Arnt,Atmin,Atp2c1,Atrx,Axin1,Bap1,Bcar1,Bicral,Birc6,Bmp4,Bmpr2,Bptf,Braf,Brca2,Brd1,Brd2,Brd4,Brd7,Brpf1,Btaf1,C1galt1c1,C330007P06Rik,Casc3,Cc2d2a,Ccm2,Ccnc,Cdh2,Cdh5,Cenpc1,Cflar,Chd2,Chm,Col4a3bp,Commd1,Cops3,Cops5,Cops8,Coq6,Cplane1,Cpox,Crebbp,Crtap,Csk,Csnk2b,Ctgf,Ctnnb1,Cul4b,Cul7,Cwc27,Dad1,Dars,Dax…
MP:0013656	abnormal hematopoietic cell morphology	3.01e-22	9.62e-20	1325	4421	Common	2310022B05Rik,4933434E20Rik,Abca1,Abca6,Abcb10,Abcb1a,Abcc10,Abcd1,Abhd12,Abhd5,Abraxas2,Abtb2,Acaa1a,Acaca,Acbd5,Ace,Ackr3,Aco1,Acp2,Acsf2,Acsl3,Acsl4,Acsl5,Actl6a,Acvrl1,Adam10,Adam17,Adam8,Adamts7,Adar,Add1,Adgre5,Adgrf5,Adipoq,Adm,Adpgk,Aff1,Agap1,Ago2,Agpat1,Ahcyl1,Ahr,Aif1,Aimp1,Akap11,Akap13,Akap9,Akna,Akr1a1,Aldh2,Aldh3a2,Anapc13,Ank,Ankrd11,Ankrd27,Ano10,Ano6,Anpep,Anxa7,Ap1g1,Ap3b1,Ap4e…
MP:0000259	abnormal vascular development	4.69e-22	1.45e-19	325	4421	Common	4933434E20Rik,Abi1,Acvr1,Acvrl1,Adam10,Adamts12,Adamts7,Adcy9,Adgra2,Adm,Aggf1,Ahr,Angpt2,Angptl4,Anxa1,Anxa2,Aph1a,Arap3,Arhgef15,Arid1a,Arid2,Arnt,Ate1,Atg16l1,Atp11a,Atp2a2,Atp7a,B4galt1,Birc6,Bmp4,Bmpr1a,Bmpr2,Braf,Brd2,Cacna1c,Capn2,Capns1,Casp8,Cav2,Ccdc134,Ccdc88a,Ccl2,Ccm2,Cd44,Cd47,Cd82,Cdh2,Cdh5,Chd7,Chm,Chrd,Clic4,Cmip,Cog6,Col4a3bp,Commd9,Coro1c,Crebbp,Crim1,Csk,Ctbp2,Ctgf,Ctnnb1,Ctss…
MP:0002396	abnormal hematopoietic system morphology/development	7.08e-21	2.11e-18	1466	4421	Common	2310022B05Rik,4933434E20Rik,Abca1,Abca6,Abcb10,Abcb1a,Abcc10,Abcc4,Abcd1,Abcg2,Abhd12,Abhd5,Abraxas2,Abtb2,Acaa1a,Acaca,Acbd5,Ace,Ackr3,Aco1,Acp2,Acsf2,Acsl3,Acsl4,Acsl5,Actl6a,Acvrl1,Adam10,Adam17,Adam8,Adamts6,Adamts7,Adar,Add1,Adgre5,Adgrf5,Adh5,Adipoq,Adm,Adpgk,Aff1,Agap1,Ago2,Agpat1,Ahcyl1,Ahr,Aif1,Aimp1,Akap11,Akap12,Akap13,Akap9,Akna,Akr1a1,Aldh2,Aldh3a2,Anapc13,Ank,Ankrd11,Ankrd27,Ano10,A…
MP:0013657	abnormal blood cell morphology	3.75e-20	1.08e-17	960	4421	Common	4933434E20Rik,Abca1,Abca6,Abcb10,Abcb1a,Abhd5,Abraxas2,Acaa1a,Acbd5,Ace,Aco1,Acp2,Acsf2,Acsl4,Acsl5,Actl6a,Acvrl1,Adam10,Adam17,Adamts7,Adar,Add1,Adgre5,Adgrf5,Aff1,Agap1,Ago2,Agpat1,Ahcyl1,Ahr,Aif1,Akap13,Akna,Aldh3a2,Anapc13,Ankrd27,Anxa7,Ap3b1,Ap4e1,Apbb2,Apc,Apex2,Appl1,Appl2,Arhgap15,Arhgap17,Arhgap22,Arhgap25,Arhgef1,Arhgef3,Arhgef5,Arid4a,Arid5b,Arl6ip1,Arnt,Arpc1b,Arpc2,Arpc4,Arrb1,Arrb2,…
MP:0001697	abnormal embryo size	9.65e-20	2.69e-17	396	4421	Common	4933427D14Rik,Aatf,Abca1,Acaca,Acvr1,Acvr1b,Acvr2a,Adam10,Adar,Aifm1,Akap10,Anapc4,Ankrd11,Apc,Aph1a,Arap3,Arhgap1,Arhgap35,Arid1a,Arih2,Arl8b,Arnt,Atp2a2,Atp2c1,Atp7a,Atrx,Axin1,B4galt5,Becn1,Bmpr1a,Bptf,Braf,Brca2,Brd2,Casc3,Casp8,Cc2d2a,Ccdc134,Cdc42,Cdc73,Cdk4,Cfl1,Chmp5,Chrd,Ciapin1,Ckap4,Cluh,Cnbp,Col4a3bp,Commd1,Cops5,Cops8,Coq6,Cox4i1,Crebbp,Crybg1,Cse1l,Csk,Csnk2b,Ctbp2,Ctgf,Ctnnb1,Cul1,…
MP:0000313	abnormal cell death	1.6e-19	4.33e-17	733	4421	Common	Abcc9,Acp1,Acvr1,Adar,Adm,Ago4,Ahctf1,Ahi1,Ahr,Aifm1,Aimp1,Akap6,Akt3,Aldh2,Alkbh5,Alms1,Angpt2,Antxr1,Antxr2,Apaf1,Apbb1,Apc,Apex2,App,Appl1,Arfgef1,Arhgap1,Arhgef15,Arih2,Arnt,Ate1,Atf6,Atf6b,Atg3,Atg7,Atm,Atmin,Atp6ap2,Atp7a,Atr,Babam2,Bach1,Bad,Bag3,Bag6,Bax,Bcl10,Bcl2l1,Bcl2l2,Bcl3,Bcl6,Bdnf,Becn1,Bid,Birc3,Birc6,Blnk,Bmp4,Bmpr1a,Bmpr1b,Bnip3,Bnip3l,Braf,Brca2,Brd1,Brd2,Btg1,Btrc,C1qa,Cacna1…
MP:0002128	abnormal blood circulation	4.4e-19	1.15e-16	408	4421	Common	2700049A03Rik,Aars,Abca1,Abca3,Abcb7,Abcb8,Abi1,Ackr3,Acta2,Acvrl1,Adam10,Adam17,Adam19,Adar,Adcy9,Adgra2,Adgrg6,Adipoq,Adm,Aggf1,Agtrap,Akap12,Alkbh1,Anxa7,Ap1m1,Ap3b1,Ap4e1,Apaf1,Apc,App,Arf6,Arid1a,Arid2,Arid4a,Ash1l,Ate1,Atox1,Atp2a2,Atp7a,Birc6,Bmpr1a,Bmpr2,Braf,Brd2,Btaf1,C1galt1c1,Cacna1c,Capn2,Capns1,Casp8,Casp9,Cav1,Cc2d2a,Ccdc134,Ccl2,Ccm2,Cdc42,Cdh2,Cdon,Cflar,Chd2,Chd7,Chrd,Cog6,Col1a…
MP:0011092	embryonic lethality, complete penetrance	6.36e-19	1.62e-16	243	4421	Common	Abcb10,Abi1,Actl6a,Acvr1b,Aebp2,Ankfy1,Apc,Aplp2,Arid4b,Arnt,Arrdc3,Asah1,Asna1,Atm,Axin1,Bmp4,Brca2,Brd4,Brpf1,Cacnb2,Capns1,Casp8,Cdc73,Cdh5,Cdk7,Cenpc1,Chd4,Chd7,Chd8,Chordc1,Ckap5,Cnot3,Col3a1,Col4a1,Cox15,Cpt1a,Crebbp,Crkl,Csnk1a1,Ctnnb1,Ctnnbl1,Cul5,Cyfip1,Dab2,Dbi,Dcaf1,Dctn1,Ddx24,Derl1,Dhx30,Dicer1,Disp1,Dnm2,Dnmt1,Dock4,Drosha,Dyrk1a,E2f3,Efnb2,Egfr,Eif3h,Eif3m,Erbb2,Erc1,Etv5,Exoc5,Ext…
MP:0003984	embryonic growth retardation	9.99e-19	2.46e-16	309	4421	Common	Abca1,Abcb7,Abi1,Acaca,Acvrl1,Adar,Aff4,Ago2,Aifm1,Akap13,Alas1,Anapc4,Aplp2,Arnt,Atp2c1,Atrx,Axin1,Bap1,Bcar1,Bicral,Bmp4,Bmpr2,Bptf,Braf,Brca2,Brd1,Brd2,Brd4,Btaf1,C1galt1c1,C330007P06Rik,Casc3,Ccm2,Ccnc,Cdh2,Cdh5,Cenpc1,Cflar,Chm,Commd1,Cops3,Cops5,Cops8,Coq6,Cplane1,Cpox,Crebbp,Csk,Csnk2b,Ctgf,Ctnnb1,Cul4b,Dad1,Dars,Daxx,Ddx3x,Derl1,Dhx30,Dlc1,Dld,Dll4,Dnaja3,Dnm1l,Dph3,Dyrk1a,E2f4,Efnb2,Ehmt…
MP:0000260	abnormal angiogenesis	1.53e-18	3.67e-16	246	4421	Common	4933434E20Rik,Abi1,Acvr1,Acvrl1,Adam10,Adamts12,Adcy9,Adgra2,Adm,Aggf1,Ahr,Angpt2,Angptl4,Anxa1,Anxa2,Aph1a,Arap3,Arhgef15,Arid1a,Arid2,Arnt,Ate1,Atg16l1,Atp11a,Atp2a2,B4galt1,Birc6,Bmp4,Bmpr1a,Braf,Brd2,Cacna1c,Cav2,Ccdc88a,Ccl2,Ccm2,Cd44,Cd47,Cd82,Cdh5,Chd7,Chm,Chrd,Clic4,Cmip,Cog6,Col4a3bp,Commd9,Coro1c,Crebbp,Crim1,Ctgf,Ctnnb1,Ctss,Cxcl12,Cxcr4,Cyr61,Dcbld2,Ddah1,Dicer1,Dll4,Dock4,Dstn,Dusp3,…
MP:0002086	abnormal extraembryonic tissue morphology	1.75e-18	4e-16	384	4421	Common	4933434E20Rik,Abca1,Abcb7,Abi1,Acvr1,Acvr1b,Acvrl1,Adam10,Adam17,Adamts9,Adar,Adcy9,Adm,Aggf1,Ago2,Alkbh1,Aph1a,Arap3,Arid1a,Arl8b,Arnt,Atf2,Atg16l1,Atp11a,Atp7a,Atr,Atrx,Axin1,Becn1,Birc6,Bmp1,Bmp4,Bmpr1a,Bmpr2,Bptf,Braf,Brca2,Brd2,C3,Calcrl,Capn2,Capns1,Casp8,Ccdc134,Ccm2,Ccnc,Cdh2,Cdh5,Cdk12,Cdk7,Chm,Chmp5,Chrd,Chuk,Cmip,Cog6,Col27a1,Col4a1,Col4a3bp,Commd1,Cops2,Cops3,Coro1c,Crebbp,Crim1,Crkl,…
MP:0005369	muscle phenotype	1.76e-18	4e-16	759	4421	Common	4933434E20Rik,Aars,Abca1,Abca5,Abcb8,Abcc9,Abhd12,Abhd5,Acacb,Acadm,Acads,Acadvl,Acan,Ackr3,Acp1,Acta2,Acvr1,Acvrl1,Adam12,Adam17,Adam19,Adarb1,Adcy6,Adgrg6,Adipoq,Adm,Agl,Agtpbp1,Ahr,Aifm1,Akap12,Akap13,Akap6,Aldh2,Als2,Angptl2,Ank,Ank2,Anxa6,Ap4e1,Aph1a,App,Appl1,Araf,Arhgap1,Arhgap42,Arhgef1,Arhgef12,Arid1a,Arid1b,Arid2,Arid5b,Arrb1,Asl,Aspa,Ate1,Atg16l1,Atg5,Atp11a,Atp1a1,Atp1a2,Atp1b1,Atp2a2…
MP:0010545	abnormal heart layer morphology	1.88e-18	4.17e-16	286	4421	Common	4933434E20Rik,Aars,Abca5,Abcb8,Abhd5,Abi1,Acadm,Acadvl,Ackr3,Acvrl1,Adam17,Adgrg6,Adm,Aifm1,Akap12,Akap13,Akap6,Arid1a,Arid2,Asl,Ate1,Atg5,Atp11a,Atp2a2,Bag3,Baz1b,Bcar1,Bcl6,Bin1,Bmpr2,Braf,Brd2,Btaf1,Cacna1c,Calcrl,Cap2,Casp8,Cast,Cav1,Cdh2,Cdkn1b,Cenpf,Cflar,Chd2,Chd7,Cisd2,Clcn3,Clu,Cnot3,Col3a1,Col4a3bp,Commd9,Crebbp,Cryab,Csnk1a1,Csrp2,Ctnnb1,Ctsl,Daam1,Dag1,Ddr2,Ddx3x,Des,Dicer1,Dll4,Dmd,D…
MP:0005329	abnormal myocardium layer morphology	6.36e-18	1.37e-15	281	4421	Common	4933434E20Rik,Aars,Abca5,Abcb8,Abhd5,Abi1,Acadm,Acadvl,Ackr3,Acvrl1,Adam17,Adgrg6,Adm,Aifm1,Akap12,Akap13,Akap6,Arid1a,Arid2,Asl,Ate1,Atg5,Atp11a,Atp2a2,Bag3,Baz1b,Bcar1,Bcl6,Bin1,Bmpr2,Braf,Brd2,Btaf1,Cacna1c,Calcrl,Cap2,Casp8,Cast,Cav1,Cdh2,Cdkn1b,Cenpf,Cflar,Chd2,Chd7,Cisd2,Clcn3,Clu,Cnot3,Col4a3bp,Commd9,Crebbp,Cryab,Csnk1a1,Csrp2,Ctsl,Daam1,Dag1,Ddr2,Ddx3x,Des,Dicer1,Dll4,Dmd,Dnaja3,Dnm1l,Dt…
MP:0005387	immune system phenotype	8.84e-18	1.86e-15	1734	4421	Common	2310022B05Rik,4933434E20Rik,AU040320,Abca1,Abcb1a,Abcc1,Abcc10,Abcc4,Abcd1,Abcg2,Abhd12,Abhd16a,Abhd5,Abraxas2,Abtb2,Acaca,Acan,Acbd5,Ace,Ackr3,Aco1,Acox1,Acp1,Acp2,Acsl3,Actl6a,Acvr1,Adam10,Adam17,Adam8,Adamts5,Adamts6,Adamts9,Adar,Adcy9,Adgre5,Adgrf5,Adh5,Adipoq,Adm,Adpgk,Adprh,Aff1,Agap1,Agbl5,Ago2,Agtpbp1,Ahi1,Ahnak,Ahr,Aif1,Aimp1,Akap11,Akap12,Akap13,Akap9,Akna,Akr1a1,Akt3,Aldh2,Alms1,Alox5a…
MP:0001785	edema	1.08e-17	2.23e-15	299	4421	Common	2700049A03Rik,4933434E20Rik,Abca5,Abi1,Acvr1,Adam17,Adam19,Adamts6,Adcy9,Adgrg6,Adipoq,Adm,Ago2,Ahr,Angpt2,Arf6,Arid2,Asah1,Ate1,Atg16l1,Atmin,Atp11a,Atp2a2,Bag3,Bag6,Bcr,Birc6,Bloc1s6,Bmp4,Bpnt1,Braf,Brd2,Btaf1,C2cd3,Calcrl,Casp8,Cav1,Ccm2,Cd14,Cdc42,Cdh2,Cdh5,Cdk4,Cfh,Cfl1,Cflar,Chd2,Chd7,Chrd,Cir1,Clu,Cnot9,Col4a2,Commd9,Cop1,Coro1c,Cplane1,Crim1,Crk,Cryab,Ctnnb1,Ctsa,Cxcr4,Cyfip2,Dbnl,Ddx3x,D…
MP:0013658	abnormal myeloid cell morphology	1.43e-17	2.86e-15	902	4421	Common	4933434E20Rik,Abca1,Abca6,Abcb10,Abcb1a,Abcd1,Abhd12,Abhd5,Abraxas2,Acaa1a,Acbd5,Ace,Aco1,Acp2,Acsf2,Acsl4,Acsl5,Actl6a,Acvrl1,Adam10,Adam17,Adam8,Adamts7,Adar,Add1,Adgre5,Adgrf5,Adipoq,Agap1,Ago2,Agpat1,Ahcyl1,Ahr,Aif1,Aimp1,Akna,Akr1a1,Aldh3a2,Anapc13,Ank,Ankrd11,Ankrd27,Ano6,Anxa7,Ap3b1,Ap4e1,Apbb2,Apc,Apex2,App,Appl1,Appl2,Arhgap15,Arhgap22,Arhgap25,Arhgef1,Arhgef3,Arhgef5,Arid4a,Arl6ip1,Arnt…
MP:0006208	lethality throughout fetal growth and development	1.64e-17	3.21e-15	245	4421	Common	Abca1,Aco1,Acvr1,Acvrl1,Adam17,Adgra2,Adgrl2,Adm,Aifm1,Ambra1,Angptl4,Apaf1,Apc,Arf6,Arid1a,Arih2,Ate1,Atmin,Atp7a,Bag6,Bicc1,Birc6,Bmp4,Bmpr2,Braf,Brca2,Brd1,Brd7,Cacna1c,Calcrl,Capn2,Carm1,Cbl,Cc2d2a,Cd274,Cdc42,Cdh2,Cdh5,Chd2,Chd7,Chrd,Col4a1,Col4a2,Cop1,Creb1,Crebbp,Crk,Crkl,Csnk1d,Ctbp2,Ctnnb1,Cul4b,Cul7,Cxcl12,Cxcr4,Daam1,Ddx3x,Dicer1,Dock1,E2f3,Egfr,Elavl1,Ep300,Epas1,Etv5,F11r,F2r,Fbxl20,…
MP:0009850	embryonic lethality between implantation and placentation	5.46e-17	1.05e-14	275	4421	Common	Abcb7,Abce1,Acaca,Acly,Acvr1,Adamts9,Ago2,Ahctf1,Alas1,Alg5,Amd1,Apc,Arf1,Arhgap29,Arid1a,Ash2l,Atoh8,Atp2a2,Atr,Atxn10,Bap1,Becn1,Bmp4,Bmpr1a,Bmpr2,Bptf,Braf,Brca2,Btf3,Bub3,Bysl,Caml,Ccdc174,Cct3,Cdan1,Cdc42,Cdk12,Cenpe,Chmp4b,Chrd,Clns1a,Copb2,Cops2,Cops3,Cops5,Cops6,Cript,Cse1l,Csnk2b,Ctdnep1,Ctnnb1,Cul1,Cul3,Cxxc1,Cyfip1,Dab2,Dad1,Ddx24,Ddx3x,Dhx29,Dhx36,Dhx9,Dicer1,Dido1,Dkc1,Dld,Dnaja3,Don…
MP:0011180	abnormal hematopoietic cell number	7.01e-17	1.31e-14	1011	4421	Common	2310022B05Rik,4933434E20Rik,Abca1,Abcb10,Abcb1a,Abcc10,Abraxas2,Abtb2,Acaca,Acbd5,Ace,Ackr3,Aco1,Acp2,Acsl3,Acsl4,Acsl5,Actl6a,Adam10,Adam17,Adam8,Adamts7,Add1,Adgre5,Adgrf5,Adipoq,Adm,Adpgk,Aff1,Agap1,Ago2,Aif1,Aimp1,Akap11,Akap13,Akap9,Akna,Akr1a1,Aldh2,Aldh3a2,Ankrd11,Ankrd27,Ano10,Anpep,Anxa7,Ap1g1,Ap4e1,Apc,Apex2,Arap2,Arhgap15,Arhgap17,Arhgap22,Arhgap25,Arhgdib,Arhgef1,Arhgef5,Arhgef6,Arid1…
MP:0010832	lethality during fetal growth through weaning	9.98e-17	1.83e-14	1034	4421	Common	Abca1,Abca3,Abcb7,Abcc9,Abhd5,Acadm,Acan,Ace,Ackr3,Aco1,Acvr1,Acvr2a,Acvrl1,Adam10,Adam12,Adam17,Adam19,Adamts1,Adar,Adarb1,Adcy3,Adcy7,Adgra2,Adgrl2,Adk,Adm,Aebp1,Aff1,Aff4,Ago2,Ahi1,Ahr,Aifm1,Akap6,Akna,Aldh1a3,Ambra1,Angpt2,Angptl4,Ank2,Ank3,Ano6,Ap3b1,Apaf1,Apc,Araf,Arf6,Arfgef1,Arhgap1,Arhgap35,Arhgap5,Arid1a,Arid1b,Arid5b,Arih2,Arl13b,Arl3,Arl8b,Arnt,Arrdc3,Asl,Asxl2,Ate1,Atf2,Atg12,Atg16l1…
MP:0001698	decreased embryo size	1.05e-16	1.85e-14	330	4421	Common	Aatf,Acaca,Acvr1,Adam10,Aifm1,Ankrd11,Apc,Aph1a,Arap3,Arhgap1,Arhgap35,Arid1a,Arl8b,Arnt,Atp2a2,Atp2c1,Atp7a,Atrx,Axin1,B4galt5,Becn1,Bmpr1a,Bptf,Braf,Brca2,Brd2,Casc3,Casp8,Cc2d2a,Ccdc134,Cdc42,Cdc73,Cfl1,Chmp5,Chrd,Ciapin1,Cluh,Cnbp,Col4a3bp,Commd1,Cops5,Cops8,Crebbp,Cse1l,Csk,Csnk2b,Ctbp2,Ctgf,Ctnnb1,Cul1,Cul3,Cul4b,Cul7,Daam1,Dab2,Dad1,Dag1,Dap3,Daxx,Ddrgk1,Dicer1,Disp1,Dkc1,Dld,Dlg1,Dnm1l,Dp…
MP:0001914	hemorrhage	1.05e-16	1.85e-14	330	4421	Common	2700049A03Rik,Abca1,Abca3,Abcb7,Abi1,Ackr3,Acvrl1,Adam10,Adam17,Adam19,Adar,Adcy9,Adgra2,Adgrg6,Adipoq,Adm,Aggf1,Alkbh1,Anxa7,Ap1m1,Ap3b1,Apaf1,Apc,App,Arf6,Arid1a,Arid2,Arid4a,Ate1,Atox1,Atp7a,Birc6,Bmpr1a,Braf,Brd2,C1galt1c1,Cacna1c,Capns1,Casp8,Casp9,Cc2d2a,Ccdc134,Ccm2,Cdc42,Cdon,Cflar,Chd2,Chd7,Chrd,Cog6,Col1a2,Col4a1,Col4a2,Commd9,Cpt2,Crebbp,Crim1,Crk,Ctnnb1,Cul7,Cx3cr1,Cxcl12,Cxcr4,Cyp51,…
MP:0000350	abnormal cell proliferation	1.08e-16	1.86e-14	512	4421	Common	Aatf,Acp1,Actl6a,Acvr1,Adam17,Adamts7,Aebp1,Ago2,Ahctf1,Aifm2,Aldh3a2,Alg2,Alms1,Ambra1,Anxa1,Apaf1,Apc,Apex2,Arhgap1,Arid2,Arl13b,Atf6,Atg7,Atm,Atmin,Atr,Atrx,Babam2,Bag6,Bcor,Birc6,Bmi1,Bmpr1a,Bmpr1b,Bmpr2,Bptf,Braf,Brca2,Brd2,Brpf1,Btg1,Btrc,C3,Cacybp,Cadm1,Calcrl,Cav1,Cbx7,Ccdc134,Ccdc80,Ccndbp1,Cd163,Cd34,Cd44,Cd74,Cdc42,Cdc73,Cdk11b,Cdk2,Cdk5rap2,Cdk7,Cdkn1a,Cdkn1b,Cdon,Cebpb,Cebpd,Cenpe,Ce…
MP:0005370	liver/biliary system phenotype	1.32e-16	2.23e-14	712	4421	Common	4933434E20Rik,Abca1,Abca5,Abcb10,Abcb7,Abcc3,Abcd3,Abcg2,Abhd5,Acaca,Acad8,Acadl,Acadm,Acads,Acadvl,Acan,Ace,Aco1,Acot13,Acot7,Acox1,Acvrl1,Adamts7,Adar,Adcy3,Adcy9,Adipoq,Adipor2,Adk,Adm,Aebp1,Aga,Agl,Agpat5,Ahr,Akap10,Akap12,Aldh1a1,Aldh2,Alms1,Amfr,Ank2,Anks6,Anxa7,Apc,Arf6,Arhgap1,Arid4a,Arih2,Arl3,Arrdc3,Asah1,Atad5,Atf6,Atg5,Atg7,Atm,Atox1,Atp11a,Atp7a,Atp8b1,Atr,Azin1,Bag1,Bag3,Bbs2,Bbs4,B…
MP:0012556	increased cell death	1.89e-16	3.14e-14	455	4421	Common	Acvr1,Adar,Adm,Aifm1,Aimp1,Akap6,Akt3,Aldh2,Alms1,Antxr2,Apaf1,Apc,App,Arfgef1,Arhgap1,Arih2,Arnt,Atg3,Atg7,Atmin,Atp6ap2,Atp7a,Atr,Babam2,Bad,Bag3,Bag6,Bcl10,Bcl2l1,Bdnf,Becn1,Birc6,Blnk,Bmp4,Bmpr1a,Bmpr1b,Braf,Brca2,Brd1,Brd2,Btg1,Btrc,C1qa,Calcrl,Caml,Caprin1,Cask,Casp3,Casp8,Cast,Ccdc47,Ccni,Cd200,Cd22,Cd59a,Cdc42,Cdc73,Cdh5,Cdk11b,Cdk12,Cdk5rap2,Cdk6,Cdk7,Cebpb,Cep63,Cflar,Chd4,Chd7,Chd8,Clp…
MP:0001545	abnormal hematopoietic system physiology	2.21e-16	3.59e-14	840	4421	Common	Abca1,Abcb1a,Abcc1,Abhd16a,Acaca,Actl6a,Adam10,Adam17,Adcy9,Adipoq,Ago2,Ahnak,Ahr,Akap13,Akr1a1,Alox5ap,Angptl2,Ano6,Anpep,Anxa1,Anxa2,Anxa7,Anxa8,Ap3b1,Apc,Apex2,Appl1,Arhgap15,Arhgap25,Arhgdib,Arhgef1,Arhgef12,Arhgef2,Arhgef3,Arhgef5,Arhgef6,Arid1a,Arrb2,Ash1l,Atf3,Atg16l1,Atg3,Atg5,Atg7,Atm,Atmin,Atp6v1h,Atr,Azi2,B2m,B3gnt5,B4galt1,B4gat1,Bad,Bak1,Bap1,Bax,Bbs4,Bbx,Bcl10,Bcl2l1,Bcl3,Bcl6,Bclaf…
MP:0006042	increased apoptosis	3.46e-16	5.52e-14	450	4421	Common	Acvr1,Adar,Adm,Aifm1,Aimp1,Akap6,Akt3,Aldh2,Alms1,Antxr2,Apaf1,Apc,App,Arfgef1,Arhgap1,Arih2,Arnt,Atg3,Atg7,Atmin,Atp6ap2,Atp7a,Atr,Babam2,Bad,Bag3,Bag6,Bcl10,Bcl2l1,Bdnf,Becn1,Birc6,Blnk,Bmp4,Bmpr1a,Bmpr1b,Braf,Brca2,Brd1,Brd2,Btg1,Btrc,C1qa,Calcrl,Caml,Caprin1,Cask,Casp3,Casp8,Cast,Ccdc47,Ccni,Cd200,Cd22,Cd59a,Cdc42,Cdc73,Cdh5,Cdk11b,Cdk12,Cdk5rap2,Cdk6,Cdk7,Cebpb,Cep63,Cflar,Chd4,Chd7,Chd8,Clp…
MP:0005294	abnormal heart ventricle morphology	5.74e-16	9.01e-14	421	4421	Common	4933434E20Rik,Aars,Abca1,Abcb8,Abhd5,Acadvl,Ackr3,Acvr1,Acvrl1,Adam17,Adam19,Adamts6,Adcy9,Adgrg6,Adh5,Adipoq,Adm,Aifm1,Akap12,Akap6,Ankrd1,Anks6,Ap2b1,Arid1a,Arid2,Ate1,Atg16l1,Atg5,Atp11a,Atp2a2,Baz1b,Bcl6,Bicc1,Bin1,Bmp4,Bmpr1a,Bmpr2,Bnip3l,Braf,Brd2,Cacna1c,Cap2,Capn1,Capn2,Capns1,Capza2,Casp8,Cast,Cav1,Cavin1,Cc2d2a,Ccl2,Ccm2,Cdh2,Cdkn1b,Cenpf,Cep290,Chchd10,Chd7,Chrd,Cir1,Clu,Cmip,Cnot3,Cnt…
MP:0002429	abnormal blood cell morphology/development	1.01e-15	1.56e-13	580	4421	Common	Abcb10,Aco1,Actl6a,Acvrl1,Adam10,Adam17,Adar,Add1,Aff1,Ago2,Ahr,Akap13,Ap4e1,Apc,Arf6,Arhgap1,Arhgap17,Arhgef1,Arid4a,Arid5b,Arnt,Atg7,Atm,Atmin,B4galt1,Bad,Bap1,Bax,Bcl10,Bcl2l1,Bcl3,Bcl6,Bcr,Bhlhe40,Birc3,Birc6,Blnk,Bmi1,Bnip3l,Braf,Brca2,Brd1,Bst1,Btk,C3,C3ar1,Cadm1,Carm1,Casp8,Cbl,Cbx4,Ccdc134,Ccnd3,Ccr1,Cd1d1,Cd22,Cd274,Cd34,Cd36,Cd37,Cd44,Cd47,Cd59a,Cd72,Cd74,Cd81,Cd83,Cd86,Cd9,Cdh5,Cdk5rap…
MP:0001648	abnormal apoptosis	1.21e-15	1.82e-13	646	4421	Common	Acp1,Acvr1,Adar,Adm,Ago4,Ahctf1,Ahi1,Ahr,Aifm1,Aimp1,Akap6,Akt3,Aldh2,Alkbh5,Alms1,Angpt2,Antxr2,Apaf1,Apc,App,Arfgef1,Arhgap1,Arhgef15,Arih2,Arnt,Ate1,Atf6,Atg3,Atg7,Atmin,Atp6ap2,Atp7a,Atr,Babam2,Bach1,Bad,Bag3,Bag6,Bax,Bcl10,Bcl2l1,Bcl2l2,Bcl3,Bcl6,Bdnf,Becn1,Bid,Birc3,Birc6,Blnk,Bmp4,Bmpr1a,Bmpr1b,Bnip3,Bnip3l,Braf,Brca2,Brd1,Brd2,Btg1,Btrc,C1qa,Cacna1c,Calcrl,Camk2d,Camk2g,Caml,Caprin1,Cask,…
MP:0011182	decreased hematopoietic cell number	2e-15	2.98e-13	775	4421	Common	4933434E20Rik,Abca1,Abcb10,Abcb1a,Abcc10,Abtb2,Acaca,Acbd5,Ackr3,Aco1,Acp2,Acsl3,Acsl4,Acsl5,Actl6a,Adam10,Adam17,Adgrf5,Adm,Adpgk,Aff1,Agap1,Ago2,Aif1,Akap11,Akap13,Akap9,Aldh2,Aldh3a2,Ankrd11,Ap1g1,Ap4e1,Apc,Apex2,Arhgap15,Arhgap17,Arhgap22,Arhgdib,Arhgef1,Arhgef5,Arhgef6,Arid1b,Arid4a,Arid5a,Arid5b,Arnt,Arrb1,Arrb2,Asl,Aspm,Atg16l2,Atg3,Atg5,Atg7,Atm,Atmin,Atp13a2,Atp5f1,Atp5l,Atp8a1,Atr,B2m,B…
MP:0002083	premature death	3.01e-15	4.4e-13	650	4421	Common	4930453N24Rik,Abca5,Abcb1a,Abcc9,Abhd5,Acadl,Acadvl,Acan,Ace,Ackr3,Acss1,Actl6a,Acvrl1,Adam17,Adam19,Adarb1,Adgrf5,Aebp1,Aga,Aggf1,Agl,Ahi1,Ahr,Aifm1,Akap10,Akap12,Aldh2,Amph,Ank,Ank2,Ank3,Antxr2,Ap3b1,Apaf1,Apc,App,Arhgap1,Arid4a,Arl13b,Asah1,Asl,Aspa,Asxl2,Atad1,Atad5,Ate1,Atg5,Atg7,Atm,Atmin,Atp2a2,Atp7a,Atr,Atrn,Atxn1,Atxn7,B3gnt5,B4galt1,Bad,Bag3,Bckdk,Bcl6,Bdnf,Becn1,Bicc1,Bicd2,Bloc1s6,Bmi…
MP:0002191	abnormal artery morphology	4.48e-15	6.43e-13	275	4421	Common	4933434E20Rik,Abcc9,Acadm,Ace,Acta2,Acvr1,Acvrl1,Adam19,Adcy9,Adm,Aebp1,Ahr,Amotl2,Ank,Ap2b1,Arhgef1,Arid1a,Arid2,Atg16l1,Atmin,Atp11a,Atp2a2,Atp7a,Baz1b,Bmp4,Bmpr2,Braf,Brd2,Capza2,Cav1,Cavin2,Ccm2,Cdh5,Cdo1,Chd7,Chrd,Cir1,Cmip,Cntrl,Cog6,Col3a1,Col4a2,Col4a3bp,Commd9,Coro1c,Cplane1,Crim1,Crk,Crkl,Csf1,Ctnnb1,Cul3,Cxcl12,Cxcr4,Cyr61,Ddah1,Ddr1,Des,Dhx35,Dicer1,Dll4,Dmxl2,Dnm2,Dync2h1,Dynll1,Ece1…
MP:0000716	abnormal immune system cell morphology	4.55e-15	6.43e-13	994	4421	Common	2310022B05Rik,4933434E20Rik,Abcb1a,Abcc10,Abcd1,Abhd12,Abhd5,Abraxas2,Abtb2,Acaca,Acbd5,Ace,Ackr3,Acp2,Acsl3,Actl6a,Adam10,Adam17,Adam8,Adgre5,Adgrf5,Adipoq,Adm,Adpgk,Aff1,Agap1,Ahr,Aimp1,Akap11,Akap13,Akap9,Akna,Akr1a1,Aldh2,Ank,Ankrd11,Ankrd27,Ano10,Anpep,Ap1g1,Ap4e1,Apc,Apex2,App,Arap2,Arhgap15,Arhgap17,Arhgap22,Arhgap25,Arhgdib,Arhgef1,Arhgef5,Arhgef6,Arid1b,Arid4a,Arid5a,Arid5b,Arpc4,Arsa,As…
MP:0001265	decreased body size	7.7e-15	1.07e-12	1160	4421	Common	Aars,Abca1,Abcb1a,Abcc10,Abcc4,Abcc9,Abhd16a,Abhd5,Acacb,Acan,Ace,Acot13,Acox1,Acp1,Acp2,Acsl3,Acsl4,Acvrl1,Adam17,Adamts1,Adar,Adarb1,Adcy3,Add1,Adgrf5,Adgrg6,Adh1,Adipoq,Adk,Aebp1,Aff1,Ago1,Agtpbp1,Ahi1,Ahnak,Ahr,Aifm1,Akap11,Akap6,Akap9,Akna,Akr1b3,Aktip,Aldh2,Ampd2,Angptl2,Ank,Ank2,Ankrd11,Anxa1,Anxa2,Anxa6,Ap1g1,Ap1s2,Apba1,Apc,App,Aqp1,Araf,Arcn1,Arhgap1,Arhgap23,Arhgap25,Arhgap35,Arhgap5,A…
MP:0008247	abnormal mononuclear cell morphology	1.11e-14	1.53e-12	858	4421	Common	2310022B05Rik,4933434E20Rik,Abcb1a,Abcd1,Abhd12,Acaca,Acbd5,Ace,Ackr3,Acp2,Acsl3,Actl6a,Adam10,Adam17,Adam8,Adgrf5,Adipoq,Adm,Adpgk,Aff1,Agap1,Ahr,Aimp1,Akap13,Akap9,Akr1a1,Aldh2,Ank,Ankrd11,Ano10,Anpep,Ap1g1,Ap4e1,Apc,Apex2,App,Arap2,Arhgap15,Arhgap17,Arhgap22,Arhgdib,Arhgef1,Arhgef6,Arid1b,Arid4a,Arid5a,Arid5b,Arsa,Asah1,Asl,Aspm,Atg16l1,Atg16l2,Atg3,Atg5,Atg7,Atm,Atmin,Atp11a,Atp13a2,Atp2a2,At…
MP:0008246	abnormal leukocyte morphology	1.17e-14	1.58e-12	983	4421	Common	2310022B05Rik,4933434E20Rik,Abcb1a,Abcc10,Abcd1,Abhd12,Abhd5,Abraxas2,Abtb2,Acaca,Acbd5,Ace,Ackr3,Acp2,Acsl3,Actl6a,Adam10,Adam17,Adam8,Adgre5,Adgrf5,Adipoq,Adm,Adpgk,Aff1,Agap1,Ahr,Aimp1,Akap11,Akap13,Akap9,Akna,Akr1a1,Aldh2,Ank,Ankrd11,Ankrd27,Ano10,Anpep,Ap1g1,Ap4e1,Apc,Apex2,App,Arap2,Arhgap15,Arhgap17,Arhgap22,Arhgap25,Arhgdib,Arhgef1,Arhgef5,Arhgef6,Arid1b,Arid4a,Arid5a,Arid5b,Arpc4,Arsa,As…
MP:0002108	abnormal muscle morphology	1.41e-14	1.87e-12	522	4421	Common	4933434E20Rik,Aars,Abca5,Abcb8,Abcc9,Acacb,Acadm,Acads,Acadvl,Ackr3,Acvr1,Acvrl1,Adam12,Adam17,Adam19,Adarb1,Adgrg6,Adipoq,Adm,Agl,Agtpbp1,Ahr,Aifm1,Akap12,Akap13,Akap6,Als2,Ank,Aph1a,App,Araf,Arhgap1,Arid1a,Arid5b,Asl,Ate1,Atg16l1,Atg5,Atp11a,Atp7a,Atxn1,B4gat1,Bace1,Bach1,Bag3,Bap1,Baz1b,Bcar1,Bckdk,Bcl6,Bgn,Bin1,Bmp4,Bmpr1a,Braf,Brd2,Btaf1,Cacna1c,Cacnb3,Calcrl,Cald1,Camk2d,Cap2,Casp8,Cast,Cav…
MP:0003229	abnormal vitelline vasculature morphology	2.7e-14	3.53e-12	148	4421	Common	4933434E20Rik,Abi1,Acvrl1,Adam10,Adm,Aggf1,Aph1a,Arap3,Arnt,Atg16l1,Atp11a,Atp7a,Bmpr1a,Bmpr2,Braf,Capns1,Casp8,Ccm2,Cdh2,Cdh5,Cmip,Cog6,Coro1c,Crebbp,Crim1,Csk,Ctbp2,Ctnnb1,Cul4b,Dicer1,Dlc1,Dll4,Efnb2,Eng,Enpp2,Ep300,Epas1,Erbb2,Ets2,Etv6,F2r,F3,Fbxw7,Fgfrl1,Flt1,Fn1,Foxo1,Furin,Gata2,Gatad2a,Gna13,Gtf2ird1,H13,Hif1a,Hsd17b12,Hsd17b7,Hus1,Ikbkap,Itga5,Itgav,Itgb8,Jag1,Kat2a,Kat7,Kctd10,Kdr,Klf6…
MP:0002138	abnormal hepatobiliary system morphology	2.79e-14	3.6e-12	614	4421	Common	4933434E20Rik,Abca1,Abca5,Abcb10,Abcb7,Abcd3,Abcg2,Abhd5,Acaca,Acad8,Acadl,Acadm,Acads,Acadvl,Acan,Aco1,Acot13,Acot7,Acox1,Acvrl1,Adar,Adcy3,Adcy9,Adipoq,Adipor2,Adk,Adm,Aebp1,Aga,Agl,Agpat5,Ahr,Akap10,Alms1,Amfr,Ank2,Anks6,Anxa7,Apc,Arf6,Arhgap1,Arid4a,Arih2,Arl3,Arrdc3,Asah1,Atad5,Atf6,Atg5,Atg7,Atm,Atox1,Atp11a,Atp7a,Atp8b1,Atr,Azin1,Bag1,Bag3,Bbs2,Bbs4,Bcar1,Bckdk,Bcr,Becn1,Bicc1,Birc6,Blvra,…
MP:0001544	abnormal cardiovascular system physiology	3.02e-14	3.84e-12	828	4421	Common	2700049A03Rik,Aars,Abca1,Abca3,Abca5,Abcb10,Abcb1a,Abcb7,Abcb8,Abcc4,Abcc9,Abhd2,Abhd5,Abi1,Acadm,Acadvl,Acan,Ace,Ackr3,Acp1,Acta2,Actr8,Acvrl1,Adam10,Adam15,Adam17,Adam19,Adam9,Adamts7,Adar,Adcy6,Adcy9,Adgra2,Adgrg6,Adh5,Adipoq,Adm,Aggf1,Agpat1,Agtrap,Ahr,Aif1,Aifm1,Akap10,Akap12,Akap13,Akap6,Alkbh1,Angpt2,Angptl4,Ank2,Anpep,Anxa1,Anxa6,Anxa7,Ap1g1,Ap1m1,Ap3b1,Ap4e1,Apaf1,Apc,Apod,App,Appl1,Aqp1…
MP:0000352	decreased cell proliferation	5.88e-14	7.35e-12	278	4421	Common	Aatf,Actl6a,Adam17,Adamts7,Aebp1,Alg2,Apex2,Arhgap1,Arid2,Atf6,Atm,Atmin,Atr,Atrx,Babam2,Birc6,Bmi1,Bmpr1a,Bmpr1b,Bptf,Brca2,Brd2,Btrc,C3,Cav1,Ccdc134,Ccndbp1,Cd34,Cd44,Cd74,Cdc73,Cdk11b,Cdk2,Cdk7,Cdkn1a,Cdkn1b,Cebpb,Cenpf,Chd7,Cib1,Clpp,Col4a3bp,Cops5,Cspg4,Ctc1,Ctgf,Ctnnb1,Ctnnd1,Cul4a,Cul4b,Dcaf1,Dcbld2,Dclre1a,Ddr2,Dgat1,Dicer1,Dido1,Dkc1,Dnm1l,Dnmt1,E2f3,Ecsit,Elavl1,Eloa,Emg1,Enpp2,Ep300,Er…
MP:0003091	abnormal cell migration	6.24e-14	7.65e-12	287	4421	Common	2700049A03Rik,Abhd2,Acvr1,Adam17,Adam9,Adamts7,Adgrg1,Aggf1,Ajuba,Angptl2,Anxa1,Anxa8,Apaf1,Appl1,Appl2,Arfgef2,Arhgap25,Arhgef2,Arhgef28,Arid1a,Arid5b,Arpc3,Atp2a2,B4galt1,B4gat1,Bicd2,Brpf1,Capg,Capn1,Capns1,Ccdc141,Ccdc88a,Ccl2,Ccr1,Ccr5,Cd163,Cd22,Cd36,Cd44,Cd47,Cd82,Cd99l2,Cdh2,Cdh5,Cdkn1a,Cdkn1b,Cdkn2c,Cdyl,Cfl1,Chd7,Chrd,Chst2,Chuk,Clasp2,Clic4,Cmklr1,Coro1a,Coro7,Csf1,Cspg4,Ctsc,Cttn,Cx3c…
MP:0005016	decreased lymphocyte cell number	6.29e-14	7.65e-12	524	4421	Common	4933434E20Rik,Abcb1a,Acaca,Ackr3,Acp2,Acsl3,Actl6a,Adam10,Adam17,Adm,Adpgk,Aff1,Akap13,Akap9,Aldh2,Ap1g1,Ap4e1,Apc,Apex2,Arhgap15,Arhgap17,Arhgdib,Arhgef1,Arhgef6,Arid1b,Arid4a,Arid5a,Arid5b,Asl,Aspm,Atg16l2,Atg3,Atg5,Atg7,Atm,Atmin,Atp13a2,Atp5f1,Atr,B2m,B3gnt5,Bad,Bag3,Bap1,Bcl10,Bcl2l1,Bcl3,Bcl6,Bclaf1,Becn1,Bhlhe40,Birc2,Birc3,Blnk,Bmi1,Bnip2,Braf,Brpf1,Bst1,Btk,C3ar1,C9orf72,Cacybp,Cadm1,Cal…
MP:0012382	abnormal blood cell physiology	7.08e-14	8.49e-12	781	4421	Common	Abca1,Abcb1a,Abcc1,Abhd16a,Acaca,Adam10,Adam17,Adcy9,Adipoq,Ago2,Ahnak,Ahr,Akap13,Akr1a1,Alox5ap,Angptl2,Ano6,Anpep,Anxa1,Anxa7,Anxa8,Ap3b1,Apc,Appl1,Arhgap15,Arhgap25,Arhgdib,Arhgef1,Arhgef12,Arhgef2,Arhgef3,Arhgef5,Arhgef6,Arrb2,Ash1l,Atf3,Atg16l1,Atg3,Atg5,Atm,Atmin,Atp6v1h,B2m,B3gnt5,B4galt1,B4gat1,Bad,Bak1,Bax,Bbs4,Bbx,Bcl10,Bcl2l1,Bcl3,Bcl6,Bclaf1,Bcr,Becn1,Bhlhe40,Birc2,Birc3,Birc6,Blnk,Bl…
MP:0002085	abnormal embryonic tissue morphology	1.17e-13	1.38e-11	512	4421	Common	2700049A03Rik,4933434E20Rik,Abi1,Acvr1,Acvr1b,Acvrl1,Adam10,Adam17,Adamts9,Adar,Adcy9,Adgra2,Ago2,Aifm1,Akap13,Aldh1a3,Alkbh1,Ambra1,Anks6,Apaf1,Apc,Aph1a,Arhgap29,Arhgap35,Arid1a,Arih2,Arl13b,Armc5,Arnt,Atmin,Atp11a,Atp2c1,Atp6v0c,Atp7a,Axin1,Baz1b,Bbs4,Bcl10,Bcor,Bicc1,Bmp1,Bmp4,Bmpr1a,Bmpr2,Bptf,Brca2,Brd1,Brd2,C2cd3,Cacna1c,Casp8,Casp9,Cc2d2a,Ccm2,Cdc42,Cdh2,Cdh5,Cdon,Cfl1,Chd7,Chd8,Chmp5,Chr…
MP:0000685	abnormal immune system morphology	1.75e-13	2.04e-11	1201	4421	Common	2310022B05Rik,4933434E20Rik,Abca1,Abcb1a,Abcc10,Abcc4,Abcd1,Abhd12,Abhd5,Abraxas2,Abtb2,Acaca,Acbd5,Ace,Ackr3,Aco1,Acp2,Acsl3,Actl6a,Adam10,Adam17,Adam8,Adamts6,Adamts9,Adgre5,Adgrf5,Adh5,Adipoq,Adm,Adpgk,Aff1,Agap1,Ago2,Ahr,Aif1,Aimp1,Akap11,Akap12,Akap13,Akap9,Akna,Akr1a1,Aldh2,Angpt2,Angptl4,Ank,Ankrd11,Ankrd27,Ano10,Anpep,Antxr2,Ap1b1,Ap1g1,Ap2b1,Ap4e1,Apc,Apex2,App,Araf,Arap2,Arhgap1,Arhgap1…
MP:0000598	abnormal liver morphology	1.78e-13	2.04e-11	565	4421	Common	4933434E20Rik,Abca1,Abca5,Abcb10,Abcb7,Abcd3,Abcg2,Abhd5,Acaca,Acad8,Acadl,Acadm,Acads,Acadvl,Acan,Aco1,Acot13,Acot7,Acox1,Acvrl1,Adar,Adcy3,Adcy9,Adipoq,Adipor2,Adk,Adm,Aebp1,Aga,Agl,Agpat5,Ahr,Akap10,Alms1,Amfr,Ank2,Anks6,Apc,Arf6,Arhgap1,Arid4a,Arih2,Arrdc3,Asah1,Atf6,Atg5,Atg7,Atox1,Atp11a,Atp7a,Atp8b1,Atr,Azin1,Bag1,Bag3,Bbs2,Bbs4,Bcar1,Bckdk,Bcr,Bicc1,Birc6,Blvra,Bmp4,Bpnt1,Braf,Brd1,Brd2,B…
MP:0013693	abnormal hemopoiesis	4.47e-13	5.07e-11	501	4421	Common	Abcb10,Aco1,Actl6a,Acvrl1,Adam10,Adam17,Adar,Aff1,Ago2,Ahr,Akap13,Apc,Arhgap17,Arhgef1,Arid4a,Arid5b,Atg7,Atm,Atmin,B4galt1,Bad,Bap1,Bax,Bcl10,Bcl2l1,Bcl3,Bcl6,Bcr,Bhlhe40,Birc3,Birc6,Blnk,Bmi1,Bnip3l,Braf,Brca2,Brd1,Bst1,Btk,C3ar1,Cadm1,Carm1,Casp8,Cbl,Cbx4,Ccnd3,Cd1d1,Cd22,Cd274,Cd34,Cd36,Cd37,Cd44,Cd47,Cd59a,Cd72,Cd74,Cd81,Cd83,Cd86,Cd9,Cdh5,Cdk5rap2,Cdk6,Cdkn1b,Cebpb,Cflar,Chd2,Chd4,Chordc1,C…
MP:0001784	abnormal fluid regulation	5.29e-13	5.93e-11	417	4421	Common	2700049A03Rik,4933434E20Rik,Abca5,Abhd5,Abi1,Acan,Acvr1,Acvrl1,Adam17,Adam19,Adamts6,Adcy6,Adcy9,Adgrg2,Adgrg6,Adipoq,Adm,Ago2,Ahr,Akap13,Akr1b3,Angpt2,Angptl4,Aqp1,Arf6,Arid1a,Arid2,Arnt,Asah1,Ate1,Atg16l1,Atmin,Atp11a,Atp2a2,B4galt1,Bag3,Bag6,Bbs2,Bbs4,Bcr,Birc6,Bloc1s6,Bmp4,Bmpr1a,Bpnt1,Braf,Brd2,Btaf1,C2cd3,Calcrl,Casp8,Cav1,Ccm2,Cd14,Cd2ap,Cd44,Cd47,Cd63,Cdc42,Cdc73,Cdh2,Cdh5,Cdk4,Cdkn2c,Cfh…
MP:0002081	perinatal lethality	6.85e-13	7.58e-11	601	4421	Common	Abca1,Abca3,Abcb7,Abhd5,Acan,Ackr3,Acvr1,Acvr2a,Adam10,Adam17,Adamts1,Adgra2,Aebp1,Aff4,Ago2,Akap6,Aldh1a3,Ank2,Ank3,Ano6,Ap3b1,Apaf1,Apc,Arf6,Arfgef1,Arhgap1,Arhgap35,Arhgap5,Arid1a,Arid1b,Arid5b,Arl13b,Arl8b,Arnt,Arrdc3,Atf2,Atg12,Atg16l1,Atg3,Atg5,Atg7,Atg9a,Atox1,Atp1a2,Atp2a2,Atp6ap1,Atp7a,Atxn1l,Azin1,B3gnt5,B4galt1,B4gat1,Bag6,Bbs4,Bcl10,Bicc1,Bin1,Birc6,Blmh,Bmp1,Bmp4,Bmper,Bmpr1a,Bmpr2,B…
MP:0002619	abnormal lymphocyte morphology	7.49e-13	8.18e-11	701	4421	Common	2310022B05Rik,4933434E20Rik,Abcb1a,Acaca,Ace,Ackr3,Acp2,Acsl3,Actl6a,Adam10,Adam17,Adm,Adpgk,Aff1,Akap13,Akap9,Aldh2,Ano10,Anpep,Ap1g1,Ap4e1,Apc,Apex2,Arap2,Arhgap15,Arhgap17,Arhgap22,Arhgdib,Arhgef1,Arhgef6,Arid1b,Arid4a,Arid5a,Arid5b,Asl,Aspm,Atg16l2,Atg3,Atg5,Atg7,Atm,Atmin,Atp11a,Atp13a2,Atp5f1,Atr,B2m,B3gnt5,B4galt1,Bad,Bag3,Bap1,Bax,Bcl10,Bcl2l1,Bcl3,Bcl6,Bclaf1,Becn1,Bhlhe40,Birc2,Birc3,Bl…
MP:0002106	abnormal muscle physiology	8.76e-13	9.41e-11	482	4421	Common	Aars,Abca1,Abca5,Abcb8,Abcc9,Abhd12,Abhd5,Acadm,Acadvl,Acan,Acp1,Acta2,Acvrl1,Adam17,Adcy6,Adipoq,Adm,Agl,Aifm1,Akap12,Akap13,Akap6,Aldh2,Anxa6,Ap4e1,App,Appl1,Arhgap42,Arhgef1,Arhgef12,Arid1b,Arid2,Arrb1,Asl,Aspa,Ate1,Atg5,Atp1a1,Atp1a2,Atp1b1,Atp2a2,Atp2a3,Atp2b1,Atp2b4,Atp6ap2,Atrn,Atxn7,Bace1,Bach1,Bag3,Bcar1,Bin1,Bmpr1a,Bmpr2,Bnip3,Bnip3l,Braf,Btd,Cacna1c,Cacna2d1,Cacnb3,Calcrl,Camk2d,Camta2…
MP:0000217	abnormal leukocyte cell number	8.83e-13	9.41e-11	868	4421	Common	2310022B05Rik,4933434E20Rik,Abcb1a,Abcc10,Abraxas2,Abtb2,Acaca,Acbd5,Ace,Ackr3,Acp2,Acsl3,Actl6a,Adam10,Adam17,Adam8,Adgre5,Adgrf5,Adipoq,Adm,Adpgk,Aff1,Agap1,Aimp1,Akap11,Akap13,Akap9,Akna,Akr1a1,Aldh2,Ankrd11,Ankrd27,Ano10,Anpep,Ap1g1,Ap4e1,Apc,Apex2,Arap2,Arhgap15,Arhgap17,Arhgap22,Arhgap25,Arhgdib,Arhgef1,Arhgef5,Arhgef6,Arid1b,Arid4a,Arid5a,Arid5b,Arpc4,Asah1,Asl,Aspm,Atg16l1,Atg16l2,Atg3,At…
MP:0013659	abnormal erythroid lineage cell morphology	1.01e-12	1.06e-10	476	4421	Common	Abca6,Abcb10,Ace,Aco1,Acp2,Acsf2,Actl6a,Acvrl1,Adam10,Adam17,Adamts7,Adar,Add1,Adgrf5,Agap1,Ago2,Agpat1,Aldh3a2,Anapc13,Anxa7,Ap4e1,Apbb2,Apc,Apex2,Appl1,Appl2,Arhgap25,Arid4a,Arl6ip1,Arnt,Arpc1b,Arpc2,Arpc4,Arrb1,Asah1,Asl,Asns,Aspa,Atad5,Atg16l1,Atl2,Atmin,Atp6v0d1,Atp6v1b2,Atp8a1,B4galt1,Bag1,Bap1,Bhlhe40,Bmi1,Bmp4,Bnip3l,Bola2,Braf,Brd1,Btg2,Btrc,C9orf72,Cab39l,Capns1,Casp8,Ccnd3,Cd34,Cd47,Cd…
MP:0002442	abnormal leukocyte physiology	1.13e-12	1.18e-10	718	4421	Common	Abca1,Abcb1a,Abcc1,Abhd16a,Acaca,Adam17,Adcy9,Adipoq,Ahnak,Ahr,Akap13,Akr1a1,Alox5ap,Angptl2,Anpep,Anxa1,Anxa8,Apc,Appl1,Arhgap15,Arhgap25,Arhgdib,Arhgef1,Arhgef12,Arhgef2,Arhgef5,Arhgef6,Arrb2,Ash1l,Atf3,Atg16l1,Atg3,Atg5,Atm,Atmin,Atp6v1h,B2m,B3gnt5,B4galt1,B4gat1,Bad,Bax,Bbs4,Bbx,Bcl10,Bcl2l1,Bcl3,Bcl6,Bclaf1,Bcr,Becn1,Bhlhe40,Birc2,Birc3,Birc6,Blnk,Bloc1s6,Bmi1,Bmpr1a,Bmpr2,Braf,Brca2,Bst1,Bt…
MP:0001819	abnormal immune cell physiology	2.02e-12	2.08e-10	729	4421	Common	Abca1,Abcb1a,Abcc1,Abhd16a,Acaca,Adam17,Adcy9,Adipoq,Ahnak,Ahr,Akap13,Akr1a1,Alox5ap,Angptl2,Anpep,Anxa1,Anxa8,Apc,Appl1,Arhgap15,Arhgap25,Arhgdib,Arhgef1,Arhgef12,Arhgef2,Arhgef5,Arhgef6,Arih2,Arrb2,Asb2,Ash1l,Atf3,Atg16l1,Atg3,Atg5,Atm,Atmin,Atp6v1h,Azi2,B2m,B3gnt5,B4galt1,B4gat1,Bad,Bax,Bbs4,Bbx,Bcl10,Bcl2l1,Bcl3,Bcl6,Bclaf1,Bcr,Becn1,Bhlhe40,Birc2,Birc3,Birc6,Blnk,Bloc1s6,Bmi1,Bmpr1a,Bmpr2,Br…
MP:0002123	abnormal definitive hematopoiesis	3.65e-12	3.7e-10	484	4421	Common	Abcb10,Aco1,Actl6a,Acvrl1,Adam10,Adam17,Adar,Aff1,Ago2,Ahr,Akap13,Apc,Arhgap17,Arhgef1,Arid4a,Arid5b,Atg7,Atm,Atmin,B4galt1,Bad,Bap1,Bax,Bcl10,Bcl2l1,Bcl3,Bcl6,Bcr,Bhlhe40,Birc3,Birc6,Blnk,Bmi1,Bnip3l,Braf,Brca2,Brd1,Bst1,Btk,C3ar1,Cadm1,Carm1,Casp8,Cbl,Cbx4,Ccnd3,Cd1d1,Cd22,Cd274,Cd34,Cd36,Cd37,Cd44,Cd47,Cd59a,Cd72,Cd74,Cd81,Cd83,Cd86,Cd9,Cdh5,Cdk5rap2,Cdk6,Cdkn1b,Cebpb,Cflar,Chd2,Chd4,Chordc1,C…
MP:0002421	abnormal cell-mediated immunity	4.94e-12	4.95e-10	732	4421	Common	Abca1,Abcb1a,Abcc1,Abhd16a,Acaca,Adam17,Adcy9,Adipoq,Ahnak,Ahr,Akap13,Akr1a1,Alox5ap,Angptl2,Anpep,Anxa1,Anxa5,Anxa8,Apc,Appl1,Arhgap15,Arhgap25,Arhgdib,Arhgef1,Arhgef12,Arhgef2,Arhgef5,Arhgef6,Arih2,Arrb2,Asb2,Ash1l,Atf3,Atg16l1,Atg3,Atg5,Atm,Atmin,Atp6v1h,Azi2,B2m,B3gnt5,B4galt1,B4gat1,Bad,Bax,Bbs4,Bbx,Bcl10,Bcl2l1,Bcl3,Bcl6,Bclaf1,Bcr,Becn1,Bhlhe40,Birc2,Birc3,Birc6,Blnk,Bloc1s6,Bmi1,Bmpr1a,Bm…
MP:0006113	abnormal heart septum morphology	5.32e-12	5.28e-10	233	4421	Common	4933434E20Rik,Ackr3,Acvr1,Adam17,Adam19,Adamts6,Adcy9,Akap12,Anks6,Ap2b1,Arid1a,Arid2,Ate1,Atg16l1,Atp11a,Atp2a2,Baz1b,Bicc1,Bmp4,Bmpr1a,Bmpr2,Braf,Brd2,Capza2,Cav1,Cc2d2a,Cep290,Chd7,Chrd,Cir1,Cmip,Cntrl,Cog6,Col4a2,Col4a3bp,Coro1c,Cplane1,Crebbp,Crim1,Crkl,Cxcl12,Cxcr4,Cyp51,Cyr61,Daam1,Dchs1,Dctn5,Ddx3x,Des,Dhrs3,Dhx35,Dicer1,Dnm2,Dock1,Dvl2,Dync2h1,Ece1,Edn1,Ednra,Efna1,Egln1,Ehmt1,Ep300,Epha…
MP:0002089	abnormal postnatal growth/weight/body size	6.33e-12	6.21e-10	1451	4421	Common	4930453N24Rik,Aars,Abca1,Abcb1a,Abcc10,Abcc4,Abcc9,Abhd16a,Abhd5,Acacb,Acadvl,Acan,Ace,Acot13,Acot7,Acox1,Acp1,Acp2,Acsl3,Acsl4,Acss1,Acvr1b,Acvrl1,Adam17,Adamts1,Adar,Adarb1,Adcy3,Add1,Adgrf5,Adgrg6,Adh1,Adipoq,Adipor2,Adk,Adpgk,Aebp1,Afap1l2,Aff1,Aff4,Aga,Ago1,Agtpbp1,Ahcyl1,Ahi1,Ahnak,Ahr,Aifm1,Akap11,Akap6,Akap9,Akna,Akr1b3,Aktip,Aldh2,Alkbh1,Alms1,Als2,Amfr,Ampd2,Angptl2,Ank,Ank2,Ankrd1,Ankr…
MP:0000221	decreased leukocyte cell number	6.42e-12	6.23e-10	642	4421	Common	4933434E20Rik,Abcb1a,Abcc10,Abtb2,Acaca,Acbd5,Ackr3,Acp2,Acsl3,Actl6a,Adam10,Adam17,Adgrf5,Adm,Adpgk,Aff1,Agap1,Akap11,Akap13,Akap9,Aldh2,Ankrd11,Ap1g1,Ap4e1,Apc,Apex2,Arhgap15,Arhgap17,Arhgap22,Arhgdib,Arhgef1,Arhgef5,Arhgef6,Arid1b,Arid4a,Arid5a,Arid5b,Asl,Aspm,Atg16l2,Atg3,Atg5,Atg7,Atm,Atmin,Atp13a2,Atp5f1,Atp5l,Atr,B2m,B3gnt5,B4gat1,Bad,Bag3,Bap1,Bcl10,Bcl2l1,Bcl3,Bcl6,Bclaf1,Becn1,Bhlhe40,B…
MP:0002420	abnormal adaptive immunity	1.02e-11	9.79e-10	742	4421	Common	Abca1,Abcb1a,Abcc1,Abhd16a,Acaca,Adam17,Adcy9,Adipoq,Ahnak,Ahr,Akap13,Akr1a1,Alox5ap,Angptl2,Anpep,Anxa1,Anxa5,Anxa8,Apc,Appl1,Arhgap15,Arhgap25,Arhgdib,Arhgef1,Arhgef12,Arhgef2,Arhgef5,Arhgef6,Arih2,Arrb2,Asb2,Ash1l,Atf3,Atg16l1,Atg3,Atg5,Atm,Atmin,Atp6v1h,Azi2,B2m,B3gnt5,B4galt1,B4gat1,Bad,Bax,Bbs4,Bbx,Bcl10,Bcl2l1,Bcl3,Bcl6,Bclaf1,Bcr,Becn1,Bhlhe40,Birc2,Birc3,Birc6,Blnk,Bloc1s6,Bmi1,Bmpr1a,Bm…
MP:0011181	increased hematopoietic cell number	1.05e-11	1e-09	637	4421	Common	2310022B05Rik,4933434E20Rik,Abcb10,Abcb1a,Abraxas2,Acbd5,Ace,Acp2,Acsl3,Actl6a,Adam10,Adam17,Adam8,Add1,Adgre5,Adgrf5,Adipoq,Adm,Adpgk,Agap1,Ago2,Aimp1,Akap13,Akap9,Akna,Akr1a1,Ankrd27,Ano10,Anpep,Anxa7,Ap4e1,Apc,Arap2,Arhgap17,Arhgap22,Arhgap25,Arhgef1,Arid1a,Arid4a,Arid5a,Arid5b,Arpc4,Asah1,Asl,Atad5,Atg16l1,Atm,Atp11a,Atp6v1d,B2m,B4galt1,Bak1,Bap1,Bax,Bcl10,Bcl2l1,Bcl3,Bcl6,Bclaf1,Bcor,Bcr,Bhl…
MP:0002447	abnormal erythrocyte morphology	1.26e-11	1.18e-09	437	4421	Common	Abca6,Abcb10,Ace,Aco1,Acp2,Acsf2,Actl6a,Acvrl1,Adam10,Adam17,Adamts7,Add1,Adgrf5,Agap1,Ago2,Agpat1,Aldh3a2,Anapc13,Anxa7,Ap4e1,Apbb2,Apc,Apex2,Appl1,Appl2,Arhgap25,Arid4a,Arl6ip1,Arnt,Arpc1b,Arpc2,Arpc4,Arrb1,Asah1,Asl,Asns,Aspa,Atg16l1,Atl2,Atmin,Atp6v0d1,Atp6v1b2,Atp8a1,B4galt1,Bag1,Bap1,Bhlhe40,Bmi1,Bmp4,Bnip3l,Bola2,Braf,Brd1,Btg2,Btrc,C9orf72,Cab39l,Capns1,Casp8,Ccnd3,Cd47,Cdk5rap2,Cdk6,Cfh,…
MP:0003956	abnormal body size	1.45e-11	1.34e-09	1301	4421	Common	Aars,Abca1,Abcb1a,Abcc10,Abcc4,Abcc9,Abhd16a,Abhd5,Acacb,Acadvl,Acan,Ace,Acot13,Acox1,Acp1,Acp2,Acsl3,Acsl4,Acss1,Acvrl1,Adam17,Adamts1,Adar,Adarb1,Adcy3,Add1,Adgrf5,Adgrg6,Adh1,Adipoq,Adipor2,Adk,Aebp1,Aff1,Aff4,Aga,Ago1,Agtpbp1,Ahi1,Ahnak,Ahr,Aifm1,Akap11,Akap6,Akap9,Akna,Akr1b3,Aktip,Aldh2,Alms1,Als2,Amfr,Ampd2,Angptl2,Ank,Ank2,Ankrd11,Ankrd26,Anxa1,Anxa2,Anxa6,Anxa7,Ap1g1,Ap1s2,Apba1,Apc,App,…
MP:0010402	ventricular septal defect	1.55e-11	1.42e-09	164	4421	Common	4933434E20Rik,Ackr3,Acvr1,Adam17,Adam19,Adamts6,Adcy9,Anks6,Ap2b1,Arid1a,Arid2,Ate1,Atg16l1,Atp11a,Atp2a2,Baz1b,Bicc1,Bmp4,Bmpr1a,Bmpr2,Braf,Brd2,Capza2,Cc2d2a,Cep290,Chd7,Cir1,Cmip,Cntrl,Cog6,Col4a2,Col4a3bp,Cplane1,Crebbp,Crim1,Crkl,Cxcl12,Cxcr4,Cyp51,Cyr61,Daam1,Dctn5,Ddx3x,Dhrs3,Dhx35,Dicer1,Dnm2,Dock1,Dvl2,Ece1,Edn1,Ednra,Ep300,Ephb4,Evl,Fbln1,Fgfr2,Fgfrl1,Flna,Foxp1,Gata6,Gbe1,Gja5,H13,Hand…
MP:0002451	abnormal macrophage physiology	1.62e-11	1.47e-09	231	4421	Common	Abca1,Abhd16a,Adam17,Ahr,Akr1a1,Angptl2,Anpep,Anxa1,Arhgef2,Atg16l1,Atm,Atp6v1h,B4galt1,Bcl3,Birc3,Bmpr1a,Btk,C9orf72,Camk2g,Capg,Casp3,Casp4,Cav1,Ccl2,Ccr1,Ccr5,Cd14,Cd163,Cd200,Cd36,Cd44,Cd68,Cd81,Cd93,Cdkn1a,Cebpb,Chuk,Ciita,Clcn3,Clic4,Cln3,Cmklr1,Cnpy3,Coro1a,Cry2,Csf1,Cspg4,Ctsk,Ctsl,Cx3cr1,Egr1,Eif2ak4,Eif2b5,Elavl1,Ero1l,Esr1,F3,Fads2,Farp2,Fas,Fblim1,Fcgr1,Flt1,Fmnl1,Fos,Fosl2,Fyn,Galc,G…
MP:0000717	abnormal lymphocyte cell number	1.64e-11	1.47e-09	645	4421	Common	2310022B05Rik,4933434E20Rik,Abcb1a,Acaca,Ace,Ackr3,Acp2,Acsl3,Actl6a,Adam10,Adam17,Adm,Adpgk,Aff1,Akap13,Akap9,Aldh2,Ano10,Anpep,Ap1g1,Ap4e1,Apc,Apex2,Arap2,Arhgap15,Arhgap17,Arhgap22,Arhgdib,Arhgef1,Arhgef6,Arid1b,Arid4a,Arid5a,Arid5b,Asl,Aspm,Atg16l2,Atg3,Atg5,Atg7,Atm,Atmin,Atp11a,Atp13a2,Atp5f1,Atr,B2m,B3gnt5,B4galt1,Bad,Bag3,Bap1,Bax,Bcl10,Bcl2l1,Bcl3,Bcl6,Bclaf1,Becn1,Bhlhe40,Birc2,Birc3,Bl…
MP:0000281	abnormal interventricular septum morphology	1.7e-11	1.51e-09	206	4421	Common	4933434E20Rik,Ackr3,Acvr1,Adam17,Adam19,Adamts6,Adcy9,Anks6,Ap2b1,Arid1a,Arid2,Ate1,Atg16l1,Atp11a,Atp2a2,Baz1b,Bicc1,Bmp4,Bmpr1a,Bmpr2,Braf,Brd2,Capza2,Cav1,Cc2d2a,Cep290,Chd7,Cir1,Cmip,Cntrl,Cog6,Col4a2,Col4a3bp,Cplane1,Crebbp,Crim1,Crkl,Cxcl12,Cxcr4,Cyp51,Cyr61,Daam1,Dctn5,Ddx3x,Des,Dhrs3,Dhx35,Dicer1,Dnm2,Dock1,Dvl2,Ece1,Edn1,Ednra,Efna1,Egln1,Ep300,Ephb4,Erbb2,Evl,Fbln1,Fgfr2,Fgfrl1,Flna,Fox…
MP:0011091	prenatal lethality, complete penetrance	1.95e-11	1.72e-09	204	4421	Common	Abcb7,Adm,Ago2,Akap13,Apc,Atad5,Atp2a2,Atp2b1,Atp6ap1,Atp7a,Becn1,Bmp4,Brca2,Capn2,Casp8,Ccm2,Cdc73,Cdh2,Cfl1,Chm,Col3a1,Col4a1,Commd1,Commd9,Cops3,Cops8,Ctnnb1,Cul3,Cxcl12,Cyfip1,Cyp51,Ddah1,Dhx9,Dlc1,Dmxl2,Dnm1l,Dock1,Ebp,Ednrb,Egln1,Ehmt2,Ei24,Eng,Enpp2,Ep400,Epas1,Ets2,Etv6,Ext1,Ezh2,F3,Fbxw7,Fgfr1,Flcn,Fli1,Flna,Flt4,Fn1,Fth1,Gabpa,Gars,Gpi1,Hccs,Hdac1,Herc2,Hif1a,Hmbs,Hmox1,Hnrnpc,Hyou1,Ift…
MP:0013661	abnormal myeloid cell number	2.94e-11	2.55e-09	290	4421	Common	Abca1,Abcb10,Abraxas2,Aco1,Acp2,Acsl4,Acsl5,Actl6a,Adam10,Adam17,Adamts7,Add1,Agap1,Ago2,Aif1,Aldh3a2,Anxa7,Ap4e1,Apex2,Arid4a,Arnt,Arrb1,Arrb2,Asah1,Aspm,Atad5,Atmin,Atp6v1d,Atp8a1,B4galt1,Bak1,Bap1,Bcl2l1,Bmi1,Bmp4,Bnip3l,Braf,Brd1,Btg2,Casp8,Cbl,Ccnd3,Cd47,Cd59a,Cdc42,Cdk5rap2,Cdk6,Cfh,Cflar,Chd2,Chordc1,Ciapin1,Clic1,Clpp,Col4a1,Col4a2,Copg1,Cpeb4,Cpox,Crlf3,Csnk1a1,Cul4a,Dcbld2,Dck,Ddrgk1,Dh…
MP:0000267	abnormal heart development	2.96e-11	2.55e-09	209	4421	Common	2700049A03Rik,4933434E20Rik,Abcc9,Ackr3,Acvr1,Acvrl1,Adam10,Adam19,Adgrg6,Akap13,Apc,Aph1a,Axin1,Bcar1,Bcor,Becn1,Bmp4,Bmpr1a,Braf,C2cd3,Capns1,Ccm2,Cdh2,Cdh5,Cep120,Cflar,Chd7,Chmp5,Cir1,Col4a2,Col4a3bp,Cop1,Crebbp,Csk,Ctbp2,Cyr61,Daam1,Dicer1,Disp1,Dlc1,Dll4,Dnm1l,Dusp6,Dync2h1,Ece1,Ednra,Efnb2,Egln1,Ehmt1,Eng,Ep300,Epha3,Ephb4,Erbb2,Erg,F2r,Fbxw7,Fgfr1,Fgfr2,Flna,Flt1,Fn1,Foxo1,Foxp1,Furin,Gas…
MP:0001790	abnormal immune system physiology	3.22e-11	2.75e-09	1140	4421	Common	4933434E20Rik,AU040320,Abca1,Abcb1a,Abcc1,Abcc4,Abcg2,Abhd16a,Abhd5,Acaca,Acan,Ace,Ackr3,Acox1,Acp1,Acsl3,Acvr1,Adam17,Adam8,Adamts5,Adar,Adcy9,Adgre5,Adh5,Adipoq,Adm,Adprh,Agbl5,Ahi1,Ahnak,Ahr,Aif1,Aimp1,Akap12,Akap13,Akna,Akr1a1,Alms1,Alox5ap,Als2,Amfr,Angptl2,Ank,Anpep,Antxr2,Anxa1,Anxa5,Anxa7,Anxa8,Aoah,Ap3b1,Apc,Apex2,App,Appl1,Arhgap15,Arhgap25,Arhgdib,Arhgef1,Arhgef12,Arhgef2,Arhgef5,Arhge…
MP:0011109	lethality throughout fetal growth and development, incomplete penetrance	3.31e-11	2.8e-09	129	4421	Common	Abca1,Aco1,Acvr1,Adam17,Aifm1,Angptl4,Apaf1,Apc,Arf6,Arid1a,Ate1,Atp7a,Bag6,Bicc1,Birc6,Bmp4,Braf,Brca2,Cacna1c,Capn2,Carm1,Cbl,Cc2d2a,Cd274,Cdh2,Chd2,Chd7,Chrd,Cop1,Creb1,Crebbp,Crk,Csnk1d,Ctnnb1,Cul4b,Cxcl12,Cxcr4,Daam1,Ddx3x,Dock1,Egfr,Ep300,Etv5,F11r,F2r,Fbxl20,Fbxw8,Fgfr1,Fgfrl1,Flna,Flrt2,Foxp1,Gata2,Gja1,Gnb1,Gskip,Heg1,Hexim1,Hprt,Htt,Ift140,Ift88,Igf2r,Jarid2,Kdm2b,Kitl,Klf3,Larp7,Lgr4,L…
MP:0001262	decreased body weight	4.35e-11	3.61e-09	905	4421	Common	Aars,Abca1,Abcb1a,Abcc10,Abcc4,Abcc9,Abhd16a,Abhd5,Acacb,Ace,Acot13,Acox1,Acp1,Acp2,Acsl3,Acsl4,Acvrl1,Adam17,Adamts1,Adarb1,Adcy3,Add1,Adgrf5,Adh1,Adipoq,Adk,Aebp1,Ago1,Ahi1,Ahnak,Ahr,Aifm1,Akap11,Akap6,Akap9,Akr1b3,Aldh2,Ampd2,Angptl2,Ank,Ank2,Ankrd11,Anxa1,Anxa2,Anxa6,Ap1g1,Ap1s2,Apc,App,Aqp1,Araf,Arcn1,Arhgap1,Arhgap25,Arhgef11,Arid1b,Arid5b,Arih2,Arl6ip5,Armc5,Arnt,Arpc2,Arrdc3,Asah1,Ash1l,A…
MP:0012322	decreased total tissue mass	4.35e-11	3.61e-09	905	4421	Common	Aars,Abca1,Abcb1a,Abcc10,Abcc4,Abcc9,Abhd16a,Abhd5,Acacb,Ace,Acot13,Acox1,Acp1,Acp2,Acsl3,Acsl4,Acvrl1,Adam17,Adamts1,Adarb1,Adcy3,Add1,Adgrf5,Adh1,Adipoq,Adk,Aebp1,Ago1,Ahi1,Ahnak,Ahr,Aifm1,Akap11,Akap6,Akap9,Akr1b3,Aldh2,Ampd2,Angptl2,Ank,Ank2,Ankrd11,Anxa1,Anxa2,Anxa6,Ap1g1,Ap1s2,Apc,App,Aqp1,Araf,Arcn1,Arhgap1,Arhgap25,Arhgef11,Arid1b,Arid5b,Arih2,Arl6ip5,Armc5,Arnt,Arpc2,Arrdc3,Asah1,Ash1l,A…
MP:0011702	abnormal fibroblast proliferation	9.45e-11	7.76e-09	108	4421	Common	Acp1,Alg2,Arhgap1,Atm,Babam2,Braf,Brca2,Btrc,Cacybp,Cbx7,Ccdc80,Cd44,Cdk7,Cdkn1a,Ctc1,Dcaf1,Dkc1,Dnm1l,Dok1,Ep300,Fbxo4,Fn1,Fndc3b,Gabpa,Gadd45a,Glrx3,Gnl3,Hat1,Hint1,Hmgn1,Hsd11b1,Hspb1,Htatip2,Hus1,Igfbp7,Ing1,Ino80,Itgb1,Jun,Kat2a,Kmt2a,Lig1,Lmna,Lum,Map3k7,Mapk1,Mapk3,Mcm4,Mcm9,Med1,Mgea5,Mif,Nbn,Ncoa4,Ncoa6,Ndrg2,Nono,Npm1,Numa1,Nupr1,Pak2,Patz1,Pcbp4,Pdgfra,Pdgfrb,Pggt1b,Phb2,Phc2,Phf14,Pik…
MP:0001533	abnormal skeleton physiology	1.19e-10	9.68e-09	347	4421	Common	2700049A03Rik,Acan,Acp2,Acvr1,Adam17,Adam8,Adamts5,Adgrg6,Adipoq,Aif1,Akr1a1,Aldh2,Alkbh1,Alox5ap,Ank,Ano6,Apaf1,Apc,Arid5b,Asah1,Ash1l,Atp2b1,Atp6v0d2,Atp6v1h,Atp7a,Babam2,Bbx,Bgn,Bmp6,Bmpr1a,Bmpr2,Bmx,C3,Casp3,Cav1,Cd14,Cd1d1,Cd200,Cd274,Cd276,Cd44,Cd47,Cd59a,Cd68,Cdc42,Cdkn1a,Cebpb,Cfp,Chsy1,Chuk,Ciita,Cisd2,Clec5a,Clk1,Cnot3,Col12a1,Col14a1,Col1a2,Col27a1,Creb3l1,Crebbp,Crtap,Cry2,Csf1,Csf1r,…
MP:0006205	embryonic lethality between implantation and somite formation	1.3e-10	1.05e-08	184	4421	Common	Abcb7,Abce1,Acaca,Acly,Acvr1,Adamts9,Ago2,Ahctf1,Amd1,Apc,Arf1,Arid1a,Atoh8,Atr,Becn1,Bmp4,Bmpr1a,Bmpr2,Bptf,Braf,Btf3,Bub3,Bysl,Caml,Ccdc174,Cdan1,Cdc42,Cdk12,Cenpe,Chmp4b,Clns1a,Cops2,Cops5,Cops6,Cse1l,Csnk2b,Ctnnb1,Cul1,Cul3,Cxxc1,Dad1,Dhx29,Dhx36,Dhx9,Dicer1,Dkc1,Dld,Dnaja3,Dpagt1,Drap1,Dync1h1,E4f1,Egfr,Ext1,Ext2,Ezh2,Fbn1,Fermt2,Fgfr1,Fgfr2,Flcn,Gapdh,Gata6,Gclc,Gnl3,Grb2,Gucy1b1,Hif1a,Hnrn…
MP:0010630	abnormal cardiac muscle tissue morphology	1.42e-10	1.13e-08	201	4421	Common	Aars,Abca5,Abcb8,Acadm,Acadvl,Ackr3,Acvrl1,Adam17,Adgrg6,Adm,Aifm1,Akap12,Akap13,Akap6,Arid1a,Asl,Ate1,Atg5,Bag3,Bap1,Baz1b,Bcar1,Bcl6,Bin1,Braf,Btaf1,Cacna1c,Cap2,Casp8,Cast,Cav1,Cdh2,Cdkn1b,Cenpf,Cflar,Chd2,Clu,Cnot1,Cnot3,Cryab,Csrp2,Ctsl,Daam1,Dag1,Ddr2,Ddx3x,Des,Dicer1,Dll4,Dmd,Dnaja3,Dnm1l,Dtna,Dusp6,Efnb2,Egfr,Egln1,Emd,Ep300,Ephb4,Erbb2,Ezh2,Fgfr1,Fgfr2,Foxo1,Fstl1,Fxr1,Gas2l3,Gja1,Gnaq,G…
MP:0005390	skeleton phenotype	1.49e-10	1.18e-08	1070	4421	Common	2700049A03Rik,4930453N24Rik,4933434E20Rik,Abhd5,Acan,Acp2,Acsl4,Acsl5,Acvr1,Acvr1b,Acvr2a,Adam10,Adam17,Adam19,Adam8,Adamts2,Adamts5,Adamts6,Adar,Adcy9,Adgrd1,Adgrf5,Adgrg6,Adipoq,Adipor2,Afap1l2,Agap1,Agl,Ahcyl1,Ahr,Aif1,Akap11,Akap9,Akr1a1,Aktip,Aldh1a3,Aldh2,Alkbh1,Alox5ap,Ank,Ankib1,Ankrd11,Ankrd27,Ano6,Antxr1,Anxa1,Anxa7,Ap1b1,Ap2b1,Ap4e1,Apaf1,Apc,Aph1a,Aqp1,Arhgap1,Arid1a,Arid4a,Arid5b,Arl…
MP:0000272	abnormal aorta morphology	1.67e-10	1.31e-08	144	4421	Common	4933434E20Rik,Acadm,Acta2,Acvr1,Acvrl1,Adam19,Amotl2,Ank,Ap2b1,Arhgef1,Atmin,Atp11a,Atp2a2,Atp7a,Baz1b,Bmp4,Bmpr2,Braf,Brd2,Ccm2,Chd7,Chrd,Cmip,Col3a1,Col4a2,Cplane1,Crim1,Crkl,Cul3,Cxcr4,Ddr1,Des,Dhx35,Dicer1,Dll4,Dnm2,Dync2h1,Dynll1,Ece1,Edn1,Ednra,Egfr,Emilin1,Enpp1,Ephb4,Ermp1,Eya1,Fbln1,Fbln5,Fbn1,Fkbp10,Flna,Fuz,Gata6,Gja1,Gja5,Gla,H13,Hand2,Hectd1,Hoxa3,Hprt,Hspg2,Ift140,Invs,Jag1,Jun,Kat6…
MP:0002152	abnormal brain morphology	1.88e-10	1.46e-08	810	4421	Common	4933434E20Rik,Aars,Abcb1a,Abi1,Acp2,Acvrl1,Adam10,Adam17,Adcy3,Adcy9,Add1,Adgra2,Adgrg1,Adipor2,Aff1,Aga,Aggf1,Ago2,Agtpbp1,Ahi1,Aifm1,Akap12,Akap13,Akt3,Aldh2,Alkbh1,Als2,Ambra1,Ank2,Ank3,Anxa1,Ap3b1,Ap3m2,Ap4e1,Apaf1,Apc,Aph1a,App,Arap3,Arcn1,Arfgef1,Arfgef2,Arhgap35,Arhgap5,Arhgef2,Arid1a,Arid1b,Arih2,Arnt,Arpc3,Arsa,Asah1,Asns,Aspa,Aspm,Ate1,Atf2,Atg16l1,Atg4b,Atg5,Atg7,Atm,Atmin,Atox1,Atp11a…
MP:0008195	abnormal professional antigen presenting cell morphology	2.12e-10	1.64e-08	509	4421	Common	2310022B05Rik,Abcd1,Abhd12,Ackr3,Acp2,Acsl3,Actl6a,Adam10,Adam17,Adam8,Adgrf5,Adipoq,Adpgk,Aff1,Ahr,Aimp1,Akap13,Akap9,Akr1a1,Ank,Ankrd11,Ano10,Apc,Apex2,App,Arhgap15,Arhgap17,Arhgap22,Arhgdib,Arhgef1,Arhgef6,Arid4a,Arsa,Asah1,Asl,Atg16l1,Atg7,Atm,Atmin,Atp11a,Atp2a2,Atp6v0d2,Atp6v1h,Azi2,B3gnt5,Bad,Bax,Bcl10,Bcl3,Bcl6,Bclaf1,Birc3,Blnk,Bmi1,Bmpr1a,Bst1,Btk,C1qtnf7,C3,C3ar1,C4b,C5ar1,Casp8,Cav1,C…
MP:0001588	abnormal hemoglobin	2.46e-10	1.88e-08	243	4421	Common	Abcb10,Aco1,Acsf2,Actl6a,Adam10,Adam17,Add1,Adgrf5,Ago2,Agpat1,Aldh3a2,Ap4e1,Apbb2,Appl2,Arhgap25,Arnt,Arpc2,Arrb1,Asah1,Asns,Atg16l1,Atl2,Atp6v0d1,Atp6v1b2,Atp8a1,B4galt1,Bag1,Bhlhe40,Btg2,C9orf72,Cd47,Cdk5rap2,Cdk6,Cfh,Chd2,Chn1,Chordc1,Chsy1,Ciapin1,Cln6,Clpp,Col4a1,Col4a2,Copg1,Cops4,Cp,Crlf3,Dcaf10,Ddrgk1,Dhx36,Dkc1,Dkk3,Dlg5,Dnajc10,Dock10,Dpy19l3,Dusp3,Egln1,Eif2ak1,Eif2b2,Eif2b3,Eif2b5,El…
MP:0000516	abnormal renal/urinary system morphology	3.11e-10	2.36e-08	468	4421	Common	4933434E20Rik,AB124611,Abca1,Acbd3,Ace,Acp2,Adamts1,Adipoq,Adm,Aga,Ahi1,Ahr,Akap11,Akr1b3,Aldoc,Alms1,Ampd2,Ank3,Ankrd26,Ap3b1,Ap4e1,Apc,Arhgap1,Arhgap35,Arid1b,Arid5b,Arl13b,Arl3,Asah1,Ash1l,Asl,Atad2b,Ate1,Atg5,Atmin,Atp2a2,Atp6ap2,Atp6v0d1,Atp7a,Atr,Axin1,Bag6,Bax,Bbs2,Bbs4,Bcam,Bckdk,Bcr,Bhlhe40,Bicc1,Bloc1s5,Bmp4,Bmper,Bmpr2,Boc,Braf,Brd2,Bscl2,C1qa,C3,C4b,Cacna2d1,Cald1,Casp8,Cav1,Cavin1,Cc…
MP:0001634	internal hemorrhage	3.82e-10	2.87e-08	187	4421	Common	Abca1,Abca3,Abi1,Acvrl1,Adam10,Adam17,Adcy9,Adgra2,Adgrg6,Adm,Aggf1,Alkbh1,Anxa7,Ap3b1,Apaf1,App,Arid4a,Atox1,Atp7a,Birc6,Bmpr1a,Braf,C1galt1c1,Cacna1c,Casp8,Casp9,Ccdc134,Ccm2,Cdc42,Chd2,Cog6,Col4a1,Commd9,Cpt2,Crebbp,Crim1,Ctnnb1,Cx3cr1,Cxcl12,Cxcr4,Ddb1,Dnm1l,Eng,Ep300,Epha3,Erg,Esr1,F2r,F3,Fbln1,Fbn1,Fbxl5,Fbxw7,Flcn,Fli1,Flt4,Fst,Fth1,Fut8,Fzd4,Gab1,Git1,Glrx3,Gne,Gtf2i,Gtf2ird1,Gys1,Hdac7,H…
MP:0002221	abnormal lymph organ size	4.76e-10	3.54e-08	496	4421	Common	Abca1,Abcc10,Abcc4,Adam10,Adam17,Adamts6,Adh5,Aff1,Ago2,Ahr,Aif1,Akap13,Ap1b1,Ap2b1,Ap4e1,Apc,Apex2,Araf,Arhgap1,Arhgap5,Arhgef1,Arhgef6,Arid4a,Arid5b,Asah1,Asb1,Ascc2,Atg3,Atl2,Atm,Atmin,Atp6v1b2,Atr,B3gnt5,B4galt1,Bad,Bag3,Bap1,Bax,Bcl3,Bcl6,Bhlhe40,Birc3,Blnk,Bmi1,Bnip3l,Bok,Braf,Brca2,Brd2,Bscl2,Btk,C4b,C9orf72,Cacybp,Carm1,Casp8,Cbl,Cbx4,Ccnd3,Cd200,Cd2ap,Cd47,Cd72,Cd86,Cdc73,Cdk6,Cdkn1a,Cdk…
MP:0002875	decreased erythrocyte cell number	4.88e-10	3.6e-08	136	4421	Common	Abcb10,Aco1,Acp2,Actl6a,Adam10,Ago2,Aldh3a2,Apex2,Arid4a,Arnt,Atmin,Atp8a1,B4galt1,Bmp4,Bnip3l,Braf,Btg2,Ccnd3,Cdk5rap2,Cdk6,Chd2,Ciapin1,Col4a1,Col4a2,Cpeb4,Ddrgk1,Dhx36,Dnajc11,Dnase2a,Dpy19l3,E2f4,Elk4,Emg1,Ep400,Epas1,Exoc6,Fam53b,Fbxo7,Fech,Fgfrl1,Foxo3,G6pdx,Gpi1,Gse1,Hgf,Hint1,Hk1,Hmox1,Hprt,Hyal2,Id1,Ikzf1,Ireb2,Irf2bp2,Irf8,Itgb3,Jak2,Jarid2,Kdm1a,Kdm6a,Kitl,Klf3,Kmt2a,Kmt2e,Lama4,Ldha,L…
MP:0001695	abnormal gastrulation	5.09e-10	3.72e-08	200	4421	Common	Acvr1,Acvr2a,Adamts9,Alg5,Ankrd11,Apc,Aph1a,Arid1a,Armc5,Arnt,Axin1,Bcor,Bicral,Bmp4,Bmpr2,Bptf,Cdh2,Cdh5,Chd7,Chd8,Chrd,Commd1,Cops2,Cops3,Cops5,Coq6,Csk,Cstf2,Ctnnb1,Cul1,Cul3,Cul4b,Cxxc1,Dab2,Dact1,Dad1,Dag1,Dap3,Daxx,Dctn1,Ddx3x,Dhx30,Dhx9,Disp1,Dkc1,Dlg3,Dnmt1,Dph3,Drap1,E4f1,Ecsit,Eif4g2,Enpp2,Ep300,Exoc4,Ext1,Ext2,Ezh2,Fermt2,Fgfr1,Fgfr2,Flcn,Flt1,Fn1,Furin,G6pdx,Gata6,Gatad2a,Gclc,Grb2,Hc…
MP:0001718	abnormal visceral yolk sac morphology	5.22e-10	3.79e-08	122	4421	Common	Acvrl1,Adam10,Adar,Adm,Ago2,Arap3,Arid1a,Arl8b,Arnt,Atp7a,Bmp4,Bmpr1a,Brca2,Casp8,Ccm2,Cdh2,Cdh5,Chm,Crebbp,Csk,Ctnnb1,Ctsl,Cul4b,Dlc1,Dll4,Dnmt1,Egln1,Elavl1,Eng,Ets2,Etv6,Exoc4,F3,F5,Fbxw7,Fgfr1,Fli1,Flt1,Flt4,Fn1,Foxo1,Furin,Gata2,Gna13,Gtf2ird1,Hif1a,Hsd17b12,Hsd17b7,Hus1,Ikbkap,Itgb8,Jag1,Kat7,Kdm6a,Kdr,Klf6,Krit1,Lamc1,Ldb1,Lemd2,Lemd3,Lmo2,Map2k1,Mapk14,Mapk7,Mib1,Mkl2,Myh9,Myo18a,Myocd,Na…
MP:0002084	abnormal developmental patterning	5.56e-10	4e-08	246	4421	Common	2700049A03Rik,Acvr1,Acvr2a,Adamts9,Alg5,Ankrd11,Apc,Aph1a,Arid1a,Arl13b,Armc5,Arnt,Atrx,Axin1,Bcor,Bicral,Bmp4,Bmpr2,Bptf,Brca2,C2cd3,Cc2d2a,Cdh2,Cdh5,Cep120,Chd7,Chd8,Chmp5,Chrd,Cnbp,Cnot9,Commd1,Cops2,Cops3,Cops5,Coq6,Csk,Cstf2,Ctnnb1,Cul1,Cul3,Cul4b,Cxxc1,Cyfip1,Dab2,Dact1,Dad1,Dag1,Dap3,Daxx,Dctn1,Ddx3x,Dhx30,Dhx9,Dicer1,Disp1,Dkc1,Dlg3,Dnm1l,Dnmt1,Dph3,Drap1,Dync2h1,E4f1,Ecsit,Efnb2,Eif4g2,E…
MP:0002135	abnormal kidney morphology	5.97e-10	4.25e-08	436	4421	Common	AB124611,Abca1,Ace,Acp2,Adamts1,Adipoq,Adm,Aga,Ahi1,Ahr,Akap11,Akr1b3,Aldoc,Alms1,Ampd2,Ank3,Ankrd26,Ap3b1,Ap4e1,Apc,Arhgap1,Arhgap35,Arid1b,Arid5b,Arl13b,Arl3,Ash1l,Asl,Atad2b,Ate1,Atg5,Atmin,Atp6ap2,Atp6v0d1,Atp7a,Atr,Axin1,Bag6,Bax,Bbs2,Bbs4,Bcam,Bckdk,Bcr,Bhlhe40,Bicc1,Bloc1s5,Bmp4,Bmper,Bmpr2,Boc,Braf,Brd2,Bscl2,C1qa,C3,C4b,Casp8,Cav1,Cc2d2a,Ccni,Ccr1,Cd1d1,Cd2ap,Cd36,Cd55,Cd63,Cd72,Cdc42,Cd…
MP:0000288	abnormal pericardium morphology	6.39e-10	4.48e-08	142	4421	Common	Abi1,Acvrl1,Adam10,Adm,Akap13,Aph1a,Arid1a,Axin1,Bmp4,Bmpr1a,Braf,Casp8,Ccm2,Cd36,Cdh2,Cdh5,Cenpf,Cflar,Commd9,Cpt2,Ctbp2,Cyp51,Daam1,Ddx3x,Des,Disp1,Dll4,Dnaja3,Ece1,Efnb2,Eng,Ep300,Erg,Etv6,F2r,F3,Fbn1,Flrt2,Flt4,Fn1,Foxo1,Gab1,Gata2,Gli3,Glrx3,Gna13,Gtf2i,Gtf2ird1,Hand2,Hdac7,Heg1,Hif1a,Hprt,Hsd17b7,Hspg2,Ift88,Ikbkap,Itga4,Itgb1,Itgb8,Jag1,Jarid2,Jup,Kcnh2,Kctd10,Kif3a,Kmt2b,Lats2,Lemd3,Lmo2,…
MP:0008987	abnormal liver lobule morphology	6.39e-10	4.48e-08	142	4421	Common	4933434E20Rik,Abcb10,Abcb7,Abcg2,Abhd5,Acad8,Acox1,Acvrl1,Adcy9,Agl,Ahr,Alms1,Amfr,Atg5,Atg7,Atp11a,Birc6,Bpnt1,Brd2,Brd4,Capza2,Ccr1,Ccr5,Cdkn1b,Cln3,Coro1c,Cp,Csf1,Ctbs,Dbn1,Egfr,Egln1,Ei24,Ercc1,Ercc5,Ern1,Fah,Fas,Fbxl5,Fmnl1,Fut8,Glb1,Glmp,Golm1,Gpam,Grn,Gsk3b,Gstz1,H13,Hadha,Hdac3,Hexa,Hexb,Hgf,Hgsnat,Hmgcl,Hr,Hspg2,Ikbkb,Insr,Iqgap2,Jak1,Jarid2,Jun,Kdr,Kif1bp,Kmt2b,Lgals3,Lipa,Lrp1,Man2b1,M…
MP:0009820	abnormal liver vasculature morphology	1.06e-09	7.35e-08	83	4421	Common	4933434E20Rik,Acvrl1,Adcy9,Adm,Ahr,Atp11a,Brd2,Capza2,Ccr1,Ccr5,Cmip,Cog6,Coro1c,Cp,Cryab,Csf1,Ctbs,Dbn1,Dnm1l,Egln1,Enpp1,Epas1,Epha3,Fmnl1,Fut8,Gbe1,Glmp,Gnaq,H13,Hand2,Hgf,Hgsnat,Hspg2,Itgb1,Jak1,Jarid2,Jup,Kif1bp,Kifap3,Lipa,Loxl2,Lpl,Man2b1,Manba,Map2k4,Med1,Mef2d,Met,Morc2a,Mpv17,Mtf1,Naglu,Neu1,Nov,Nxn,Pecam1,Prkag1,Prmt7,Prrc2b,Pten,Ptger4,Ptpn11,Raf1,Rb1,Reck,Rfx5,Rpgrip1l,Rundc1,Setd5,S…
MP:0011655	abnormal systemic artery morphology	1.11e-09	7.63e-08	179	4421	Common	4933434E20Rik,Acadm,Ace,Acta2,Acvr1,Acvrl1,Adam19,Adcy9,Amotl2,Ank,Ap2b1,Arhgef1,Atg16l1,Atmin,Atp11a,Atp2a2,Atp7a,Baz1b,Bmp4,Bmpr2,Braf,Brd2,Capza2,Ccm2,Chd7,Chrd,Cir1,Cmip,Cog6,Col3a1,Col4a2,Col4a3bp,Coro1c,Cplane1,Crim1,Crk,Crkl,Cul3,Cxcr4,Ddr1,Des,Dhx35,Dicer1,Dll4,Dmxl2,Dnm2,Dync2h1,Dynll1,Ece1,Edn1,Ednra,Egfr,Emilin1,Eng,Enpp1,Ephb4,Ermp1,Eya1,F2r,Fam20a,Fbln1,Fbln5,Fbn1,Fkbp10,Flna,Foxo1,F…
MP:0005018	decreased T cell number	1.13e-09	7.66e-08	365	4421	Common	4933434E20Rik,Abcb1a,Acaca,Acp2,Adam10,Adam17,Adpgk,Aff1,Aldh2,Ap1g1,Ap4e1,Apc,Apex2,Arhgdib,Arhgef1,Arhgef6,Arid1b,Arid4a,Arid5a,Arid5b,Aspm,Atg3,Atg5,Atg7,Atm,Atp13a2,Atp5f1,Atr,B2m,Bcl10,Bcl2l1,Bcl6,Bclaf1,Becn1,Bhlhe40,Bmi1,Bnip2,Braf,Brpf1,Cacybp,Cadm1,Caml,Casc4,Casp3,Casp8,Cbl,Cbx4,Ccnd3,Ccr1,Cd1d1,Cd274,Cd47,Cd74,Cd83,Cd84,Cd86,Cdk6,Cdkal1,Cflar,Chd4,Chd9,Chst3,Ciita,Clpp,Cnot4,Cog6,Cops5…
MP:0013662	decreased myeloid cell number	1.13e-09	7.66e-08	208	4421	Common	Abca1,Abcb10,Aco1,Acp2,Acsl4,Acsl5,Actl6a,Adam10,Ago2,Aif1,Aldh3a2,Apex2,Arid4a,Arnt,Arrb1,Arrb2,Aspm,Atmin,Atp8a1,B4galt1,Bap1,Bcl2l1,Bmi1,Bmp4,Bnip3l,Braf,Brd1,Btg2,Ccnd3,Cd47,Cdc42,Cdk5rap2,Cdk6,Cfh,Chd2,Ciapin1,Clpp,Col4a1,Col4a2,Cpeb4,Crlf3,Csnk1a1,Cul4a,Ddrgk1,Dhx36,Dicer1,Dkc1,Dnajc11,Dnase2a,Dpy19l3,E2f4,Egln1,Egr1,Elk4,Emg1,Entpd1,Ep400,Epas1,Erg,Etv6,Exoc6,Fam53b,Fbxo7,Fech,Fgfrl1,Fli1,…
MP:0005508	abnormal skeleton morphology	1.21e-09	8.19e-08	990	4421	Common	2700049A03Rik,4930453N24Rik,4933434E20Rik,Abhd5,Acan,Acp2,Acsl4,Acsl5,Acvr1,Acvr1b,Acvr2a,Adam10,Adam17,Adam8,Adamts2,Adamts5,Adamts6,Adar,Adcy9,Adgrd1,Adgrf5,Adipoq,Afap1l2,Agap1,Agl,Ahcyl1,Akap11,Akap9,Akr1a1,Aktip,Aldh1a3,Aldh2,Alkbh1,Ank,Ankib1,Ankrd11,Ankrd27,Ano6,Antxr1,Anxa1,Ap1b1,Ap2b1,Ap4e1,Apaf1,Apc,Aph1a,Aqp1,Arhgap1,Arid1a,Arid4a,Arid5b,Arl6ip5,Arl8b,Arpc1b,Arrdc1,Asah1,Ascc3,Ash1l,As…
MP:0005451	abnormal body composition	1.3e-09	8.72e-08	1097	4421	Common	Aars,Abca1,Abcb1a,Abcc10,Abcc4,Abcc9,Abhd16a,Abhd5,Acacb,Acadvl,Acan,Ace,Acot13,Acot7,Acox1,Acp1,Acp2,Acsl3,Acsl4,Acvrl1,Adam17,Adamts1,Adarb1,Adcy3,Add1,Adgrf5,Adh1,Adipoq,Adipor2,Adk,Adpgk,Aebp1,Afap1l2,Aff4,Aga,Ago1,Ahcyl1,Ahi1,Ahnak,Ahr,Aifm1,Akap11,Akap6,Akap9,Akr1b3,Aktip,Aldh2,Alms1,Als2,Amfr,Ampd2,Angptl2,Ank,Ank2,Ankrd11,Ankrd26,Anxa1,Anxa2,Anxa6,Anxa7,Ap1g1,Ap1s2,Ap4e1,Apc,App,Aqp1,Araf…
MP:0001730	embryonic growth arrest	1.34e-09	8.9e-08	169	4421	Common	2700049A03Rik,Aatf,Abca1,Acaca,Actr3,Acvr1,Acvr1b,Acvrl1,Ago2,Alg5,Amd1,Aph1a,Arap3,Arid1a,Ate1,Atp6v0c,Becn1,Bmpr1a,Bmpr2,Bptf,Brpf1,Btaf1,Ccm2,Cdh5,Cdk11b,Cep120,Chd7,Chd8,Cops5,Crebbp,Csk,Csnk2b,Ctcf,Cttn,Cul1,Cul4b,Dag1,Dctn1,Ddx20,Dicer1,Dido1,Dkc1,Dld,Dnmt1,Efnb2,Ehmt2,Emg1,Ep300,Ep400,Ezh2,Fam208a,Fbl,Fgfr1,Flii,Flt1,G6pdx,Gatad2a,Gclc,Gnl3,Hdac1,Hif1a,Hnrnpc,Hsf1,Hsp90b1,Htt,Hus1,Ift88,Ik…
MP:0004939	abnormal B cell morphology	1.45e-09	9.55e-08	349	4421	Common	2310022B05Rik,Ackr3,Acp2,Acsl3,Actl6a,Adam10,Adam17,Adpgk,Aff1,Akap13,Akap9,Ano10,Apex2,Arhgap17,Arhgap22,Arhgdib,Arhgef1,Arhgef6,Arid4a,Arid5b,Atg7,Atm,Atmin,Atp11a,B3gnt5,Bad,Bax,Bcl10,Bcl3,Bcl6,Bclaf1,Birc3,Blnk,Bmi1,Bst1,Btk,Casp8,Ccdc127,Ccnd3,Cd22,Cd274,Cd36,Cd37,Cd59a,Cd72,Cd74,Cd81,Cd83,Cd84,Cd86,Cdkn1a,Cdkn2c,Cds2,Cebpb,Cflar,Clec4d,Clpp,Cog6,Coro1a,Crebbp,Crls1,Csf1,Ctnnbl1,Cux1,Cxcl12,…
MP:0012321	abnormal total tissue mass	1.5e-09	9.79e-08	991	4421	Common	Aars,Abca1,Abcb1a,Abcc10,Abcc4,Abcc9,Abhd16a,Abhd5,Acacb,Acadvl,Acan,Ace,Acot13,Acox1,Acp1,Acp2,Acsl3,Acsl4,Acvrl1,Adam17,Adamts1,Adarb1,Adcy3,Add1,Adgrf5,Adh1,Adipoq,Adk,Aebp1,Aff4,Aga,Ago1,Ahi1,Ahnak,Ahr,Aifm1,Akap11,Akap6,Akap9,Akr1b3,Aldh2,Alms1,Als2,Amfr,Ampd2,Angptl2,Ank,Ank2,Ankrd11,Ankrd26,Anxa1,Anxa2,Anxa6,Anxa7,Ap1g1,Ap1s2,Apc,App,Aqp1,Araf,Arcn1,Arhgap1,Arhgap25,Arhgef11,Arid1b,Arid5b,…
MP:0004264	abnormal extraembryonic tissue physiology	1.52e-09	9.86e-08	178	4421	Common	Abca1,Abcb10,Abi1,Acvrl1,Adar,Adm,Aph1a,Arap3,Arl8b,Arnt,Ash1l,Atp7a,Birc6,Bmp4,Brd1,Cacnb2,Casp8,Ccm2,Cdc73,Chd4,Chm,Chmp5,Chordc1,Cops5,Ctbp2,Ctdnep1,Cul7,Cyr61,Dad1,Dap3,Daxx,Ddrgk1,Ddx3x,Dicer1,Dkc1,Dll4,Dph3,Ebp,Efnb2,Eng,Enpp2,Ephb4,Erg,Ern1,F2r,F3,Fbxl5,Fbxw7,Fgfr2,Fkbp4,Flt4,Fn1,Foxo1,Furin,G6pdx,Gata2,Grb2,Gtf2i,Gtf2ird1,Hif1a,Hsp90b1,Htt,Hus1,Ikbkap,Il11ra1,Irf2bp2,Itga4,Itga5,Itgb1,Itg…
MP:0005382	craniofacial phenotype	1.63e-09	1.05e-07	554	4421	Common	2700049A03Rik,4930453N24Rik,4933434E20Rik,Abhd5,Acan,Acvr1,Acvr1b,Acvr2a,Acvrl1,Adam10,Adamts2,Adamts6,Adcy9,Adgra2,Agap1,Akap10,Akap13,Akap6,Akap9,Akr1a1,Aldh1a3,Alkbh1,Ank,Ankrd11,Antxr1,Anxa1,Ap2b1,Ap3b1,Apaf1,Apc,Aph1a,App,Arhgap29,Arid1a,Arid5b,Arnt,Ate1,Atmin,Atp11a,Atp7a,Atpaf2,Atr,Atxn1l,Axin1,Baz1b,Bbs4,Bbx,Bdnf,Bicd2,Bmp1,Bmp4,Bmper,Bmpr1a,Bnc2,Braf,Brd2,Brd4,Cask,Casp3,Casp9,Cbl,Cc2d2a…
MP:0008942	abnormal induced cell death	1.65e-09	1.05e-07	141	4421	Common	Abcc9,Adar,Aifm1,Aldh2,Antxr1,Antxr2,Apaf1,Apbb1,Apex2,Appl1,Atf6,Atf6b,Atm,Atmin,Atr,Bad,Bcl2l1,Brca2,Casp3,Casp9,Ccng1,Ccs,Cd44,Cdkn1a,Cebpb,Chd2,Ciz1,Cops6,Cp,Crebbp,Cul4a,Cul9,Dab2ip,Dapk1,Ddx5,Dusp6,Eef2k,Elavl1,Ercc1,Ercc3,Ero1l,Fth1,Gclm,Glipr1,Glrx,Gpx1,Gpx7,Hif1a,Hint1,Hipk1,Hipk2,Hmgn1,Hsf1,Hspa1a,Ift122,Ikbkb,Ing1,Ino80,Irf3,Ivns1abp,Jun,Kat8,Map3k5,Mapkap1,Mbd4,Mcm9,Mcph1,Mdc1,Mdm4,Ml…
MP:0000218	increased leukocyte cell number	1.75e-09	1.11e-07	546	4421	Common	2310022B05Rik,4933434E20Rik,Abcb1a,Abraxas2,Acbd5,Ace,Acp2,Acsl3,Adam10,Adam17,Adam8,Adgre5,Adgrf5,Adipoq,Adm,Adpgk,Agap1,Aimp1,Akap13,Akap9,Akna,Akr1a1,Ankrd27,Ano10,Anpep,Ap4e1,Apc,Arap2,Arhgap17,Arhgap22,Arhgap25,Arhgef1,Arid4a,Arid5a,Arid5b,Arpc4,Asah1,Asl,Atg16l1,Atm,Atp11a,B2m,B4galt1,Bap1,Bax,Bcl10,Bcl2l1,Bcl3,Bcl6,Bclaf1,Bcor,Bcr,Bhlhe40,Birc3,Blnk,Bnip2,Brpf1,Bst1,Btk,C1qtnf7,C4b,C9orf72…
MP:0008037	abnormal T cell morphology	2.35e-09	1.48e-07	501	4421	Common	4933434E20Rik,Abcb1a,Acaca,Ace,Acp2,Acsl3,Adam10,Adam17,Adpgk,Aff1,Akap9,Aldh2,Anpep,Ap1g1,Ap4e1,Apc,Apex2,Arap2,Arhgdib,Arhgef1,Arhgef6,Arid1b,Arid4a,Arid5a,Arid5b,Aspm,Atg3,Atg5,Atg7,Atm,Atp11a,Atp13a2,Atp5f1,Atr,B2m,Bad,Bap1,Bax,Bcl10,Bcl2l1,Bcl3,Bcl6,Bclaf1,Becn1,Bhlhe40,Birc3,Blnk,Bmi1,Bnip2,Braf,Brpf1,Btk,C3ar1,Cacybp,Cadm1,Caml,Carm1,Casc4,Casp3,Casp8,Cbl,Cbx4,Ccdc127,Ccl2,Ccnd3,Ccr1,Ccr5,…
MP:0003221	abnormal cardiomyocyte apoptosis	2.39e-09	1.5e-07	55	4421	Common	Acp1,Adm,Aifm1,Akap6,Bach1,Bag3,Bmpr1a,Bnip3,Bnip3l,Calcrl,Casp3,Casp8,Chd7,Dicer1,Dnaja3,Dusp6,Egln1,Gnaq,Hdac2,Hmox1,Inpp5f,Ivns1abp,Jup,Kifap3,Map2k1,Map3k1,Mapk1,Mapk14,Mapk8,Mapk9,Mapkapk2,Mcu,Mdm4,Med1,Mtor,Myh10,Myocd,Nox4,Pak1,Phc1,Plrg1,Ptpn11,Raf1,Rasa1,Sod2,Sos1,Srf,Stat1,Stat3,Tcap,Tfam,Ube4b,Uvrag,Ywhaq,Zfpm2
MP:0002114	abnormal axial skeleton morphology	2.47e-09	1.53e-07	646	4421	Common	4930453N24Rik,4933434E20Rik,Abhd5,Acan,Acp2,Acvr1,Acvr1b,Acvr2a,Adamts2,Adamts6,Adcy9,Adgrd1,Agap1,Agl,Akap9,Akr1a1,Aldh1a3,Alkbh1,Ank,Ankrd11,Ano6,Antxr1,Anxa1,Ap1b1,Ap2b1,Ap4e1,Apaf1,Apc,Arhgap1,Arid1a,Arid5b,Arl6ip5,Arl8b,Arpc1b,Ash1l,Asxl2,Ate1,Atmin,Atp11a,Atp2b1,Atp5b,Atp6v1d,Atp7a,Atpaf2,Atr,Atxn1,Atxn1l,Atxn7,Axin1,Baz1b,Bbx,Bicd2,Bmi1,Bmp1,Bmp4,Bmp6,Bmper,Bmpr1a,Bmpr1b,Bmpr2,Bnc2,Bnip2,B…
MP:0008986	abnormal liver parenchyma morphology	2.47e-09	1.53e-07	148	4421	Common	4933434E20Rik,Abcb10,Abcb7,Abcg2,Abhd5,Acad8,Acox1,Acvrl1,Adcy9,Agl,Ahr,Alms1,Amfr,Atg5,Atg7,Atp11a,Azin1,Bcr,Bicc1,Birc6,Bpnt1,Brd2,Brd4,Capza2,Ccr1,Ccr5,Cdkn1b,Cln3,Coro1c,Cp,Csf1,Ctbs,Dbn1,Egfr,Egln1,Ei24,Ercc1,Ercc5,Ern1,Fah,Fas,Fbxl5,Fmnl1,Fut8,Glb1,Glmp,Golm1,Gpam,Grn,Gsk3b,Gstz1,H13,Hadha,Hdac3,Hexa,Hexb,Hgf,Hgsnat,Hmgcl,Hmgcr,Hr,Hspg2,Ift88,Ikbkb,Insr,Iqgap2,Jak1,Jarid2,Jun,Kdr,Kif1bp,Kmt…
MP:0000428	abnormal craniofacial morphology	2.94e-09	1.8e-07	542	4421	Common	2700049A03Rik,4930453N24Rik,4933434E20Rik,Abhd5,Acan,Acvr1,Acvr1b,Acvr2a,Acvrl1,Adam10,Adamts2,Adamts6,Adcy9,Adgra2,Agap1,Akap13,Akap6,Akap9,Akr1a1,Aldh1a3,Alkbh1,Ank,Ankrd11,Antxr1,Anxa1,Ap2b1,Ap3b1,Apaf1,Apc,Aph1a,App,Arhgap29,Arid1a,Arid5b,Arnt,Ate1,Atmin,Atp11a,Atp7a,Atpaf2,Atr,Atxn1l,Axin1,Baz1b,Bbs4,Bbx,Bdnf,Bicd2,Bmp1,Bmp4,Bmper,Bmpr1a,Bnc2,Braf,Brd2,Brd4,Cask,Casp3,Casp9,Cbl,Cc2d2a,Ccl2,C…
MP:0003881	abnormal nephron morphology	2.98e-09	1.81e-07	250	4421	Common	Abca1,Ace,Acp2,Adipoq,Adm,Aga,Ahi1,Alms1,Ampd2,Ap3b1,Arhgap35,Arid5b,Arl3,Ash1l,Asl,Atg5,Atp6ap2,Atp7a,Atr,Bag6,Bax,Bbs4,Bcam,Bcr,Bhlhe40,Bicc1,Bloc1s5,Bmp4,Bmper,C1qa,C3,C4b,Cc2d2a,Ccni,Ccr1,Cd1d1,Cd2ap,Cd55,Cd72,Cdc42,Cdh6,Cdkn1a,Cdkn2c,Cebpb,Cep290,Cfh,Cfl1,Chd2,Clu,Col4a1,Coro1a,Coro2b,Cplane1,Crim1,Ctbs,Ctdnep1,Ctnnb1,Ctnnd1,Dab2,Dapk1,Dchs1,Dcn,Ddr1,Dicer1,Dkc1,Dlg1,Dlg5,Egln1,Ep300,Ercc1,E…
MP:0005406	abnormal heart size	3.1e-09	1.87e-07	386	4421	Common	Aars,Abca1,Abcb8,Abcc9,Abhd5,Acacb,Acadvl,Acan,Ace,Ackr3,Acsl4,Acsl5,Acvr1,Acvrl1,Adam17,Adamts6,Adamts9,Adgrl3,Adipoq,Adm,Ago2,Ahr,Aifm1,Akap12,Akap13,Akap6,Ankrd26,Ap2b1,Ap4e1,Arhgef1,Arhgef15,Arid1b,Asxl2,Ate1,Atg5,Atp1a2,Atp1b1,Atp2a2,Atp6ap2,Bag3,Bbx,Bicral,Bmp4,Bmpr1a,Bmpr2,Braf,Brd2,Bscl2,C1ra,Cab39l,Cacna1c,Cacnb3,Cacybp,Calcrl,Camta2,Cap2,Capn1,Cav1,Cavin1,Ccdc134,Ccm2,Ccnd2,Ccnd3,Ccr5,C…
MP:0002722	abnormal immune system organ morphology	3.61e-09	2.16e-07	655	4421	Common	Abca1,Abcc10,Abcc4,Ackr3,Aco1,Adam10,Adam17,Adamts6,Adamts9,Adh5,Adm,Adpgk,Aff1,Ago2,Ahr,Aif1,Akap12,Akap13,Angptl4,Ap1b1,Ap2b1,Ap4e1,Apc,Apex2,Araf,Arhgap1,Arhgap5,Arhgef1,Arhgef6,Arid4a,Arid5b,Arl6ip5,Asah1,Asb1,Ascc2,Asl,Atg16l1,Atg3,Atg5,Atl2,Atm,Atmin,Atp11a,Atp2b4,Atp6v1b2,Atr,B3gnt5,B4galt1,B4gat1,Bad,Bag3,Bap1,Bax,Bcl10,Bcl2l1,Bcl3,Bcl6,Becn1,Bhlhe40,Birc3,Blnk,Bmi1,Bnip3l,Bok,Braf,Brca2,…
MP:0002452	abnormal professional antigen presenting cell physiology	3.68e-09	2.19e-07	491	4421	Common	Abca1,Abcb1a,Abhd16a,Adam17,Adcy9,Ahr,Akap13,Akr1a1,Angptl2,Anpep,Anxa1,Arhgdib,Arhgef1,Arhgef2,Arhgef5,Arhgef6,Arih2,Asb2,Ash1l,Atf3,Atg16l1,Atm,Atmin,Atp6v1h,Azi2,B2m,B3gnt5,B4galt1,Bad,Bax,Bbs4,Bbx,Bcl10,Bcl2l1,Bcl3,Bcl6,Bhlhe40,Birc3,Blnk,Bmi1,Bmpr1a,Bst1,Btk,C3ar1,C9orf72,Cabin1,Camk2g,Capg,Casp2,Casp3,Casp4,Casp8,Cav1,Ccl2,Ccnd3,Ccr1,Ccr5,Cd14,Cd163,Cd180,Cd1d1,Cd200,Cd200r1,Cd22,Cd274,Cd36…
MP:0006126	abnormal cardiac outflow tract development	3.97e-09	2.34e-07	99	4421	Common	Ackr3,Acvr1,Adam19,Arid1a,Ate1,Atmin,Bmp4,Bmpr1a,Bmpr2,Brd2,Cc2d2a,Cdh5,Cfl1,Chd7,Chrd,Col4a3bp,Cplane1,Dhx35,Dicer1,Dock1,Dvl2,Dynll1,Ece1,Ednra,Efna1,Eng,Fbln1,Fgfr2,Flna,Fn1,Foxp1,Fuz,Gata6,Gja1,Hand2,Hif1a,Hoxa3,Hprt,Hspg2,Ift140,Ift172,Ift88,Ikbkap,Jag1,Jun,Kcnh2,Kmt2d,Lama5,Lrp1,Ltbp1,Map2k5,Mapk1,Megf8,Meis2,Mkl1,Mkl2,Morc2a,Ndst1,Nf1,Nfatc1,Nrp1,Ntf3,Nxn,Parva,Patz1,Pcsk5,Pcsk6,Pdgfra,Phc…
MP:0000771	abnormal brain size	4.25e-09	2.5e-07	193	4421	Common	Adipor2,Ahi1,Aifm1,Akap13,Akt3,Apaf1,App,Arfgef1,Arhgef2,Arid1a,Arnt,Asns,Aspm,Ate1,Atf2,Atr,Atxn1,Atxn7,Axin1,B4galt2,Bckdk,Bcl2l1,Bdnf,Braf,C330007P06Rik,Casp9,Cav1,Ccdc88a,Cd81,Cdk5rap2,Cdkn1a,Cdkn1b,Cep63,Clcn3,Cnbp,Copb2,Cplane1,Ctnna1,Ctnnb1,Ctsf,Cyp27a1,Dag1,Ddb1,Depdc5,Dlg5,Dnm1l,Dst,Dyrk1a,Egfr,Eif4e2,Eif4h,Fbxw8,Fgfr2,Flna,Foxp2,Gba,Ghr,Gli3,Gnb1,Gnpat,Gnptab,Hdac2,Hectd3,Hfe,Hif1a,Hsd1…
MP:0001731	abnormal postnatal growth	4.74e-09	2.76e-07	482	4421	Common	4930453N24Rik,Abcc9,Acox1,Acp2,Acsl3,Acss1,Acvr1b,Adam17,Adgrg6,Adk,Aebp1,Ahi1,Ahr,Aifm1,Alkbh1,Ankrd1,Anxa7,Ap1g1,Apc,Apex2,Aqp1,Arhgap1,Arhgef28,Arid1b,Arid5b,Asah1,Ash1l,Asl,Asxl2,Ate1,Atg5,Atm,Atox1,Atp7a,Atp8b1,Atr,Atrn,Atxn1,B4galt1,Bace1,Bag3,Bckdk,Bcl6,Bdnf,Bmi1,Bnip3l,Braf,Brd4,C1galt1c1,Cap2,Cask,Cav1,Cc2d2a,Ccdc88a,Cd2ap,Cd36,Cdc42,Cdo1,Cep290,Cep63,Cfl1,Cfl2,Chd2,Chd7,Chuk,Cisd2,Clcn3…
MP:0002006	neoplasm	6.5e-09	3.77e-07	426	4421	Common	Acadvl,Ace,Acox1,Acvr1,Adam15,Adam9,Adamts12,Aggf1,Ahr,Aifm2,Aldh2,Amfr,Antxr1,Anxa1,Anxa7,Apaf1,Apc,Arhgef15,Arid4a,Arl6ip5,Atad5,Atf2,Atf3,Atg4c,Atm,Atmin,Atp2a2,Atp2c1,Atr,Bad,Bap1,Becn1,Bin1,Blnk,Bmpr1a,Braf,Brca2,Btrc,Bub3,Camk2g,Cat,Cav1,Cav2,Cbx7,Ccar2,Ccdc80,Ccl2,Ccnc,Ccndbp1,Ccng1,Ccr5,Cd248,Cd34,Cd44,Cd47,Cd82,Cdc37,Cdc73,Cdh13,Cdk11b,Cdk5rap2,Cdkn1a,Cdkn1b,Cdkn2c,Cebpb,Cers2,Chd2,Chfr,…
MP:0011096	embryonic lethality between implantation and somite formation, complete penetrance	6.91e-09	3.98e-07	167	4421	Common	Abcb7,Abce1,Acaca,Acly,Acvr1,Adamts9,Ago2,Ahctf1,Amd1,Arf1,Arid1a,Atoh8,Atr,Becn1,Bmp4,Bmpr1a,Bmpr2,Bptf,Braf,Btf3,Bub3,Bysl,Caml,Cdan1,Cdc42,Cdk12,Cenpe,Chmp4b,Clns1a,Cops2,Cops5,Cops6,Cse1l,Csnk2b,Ctnnb1,Cul1,Cul3,Cxxc1,Dad1,Dhx29,Dhx36,Dhx9,Dicer1,Dkc1,Dld,Dnaja3,Dpagt1,Drap1,Dync1h1,E4f1,Ext1,Ext2,Ezh2,Fbn1,Fermt2,Fgfr1,Fgfr2,Flcn,Gata6,Gclc,Gnl3,Grb2,Gucy1b1,Hnrnpc,Hsp90b1,Ints6,Ipo9,Itgb1,K…
MP:0002182	abnormal astrocyte morphology	6.99e-09	3.99e-07	110	4421	Common	Abcd1,Acp2,Aga,Aldh2,Als2,App,Arsa,Aspa,Aspm,Atg7,Atmin,Atp13a2,Atr,Atrn,Bmp4,Braf,Cadm1,Canx,Cav1,Ccm2,Cd81,Clcn3,Cln6,Col4a1,Coq9,Cp,Ctsd,Dag1,Depdc5,Ei24,Eif2b4,Eif2b5,Fgfr1,Fgfr2,Fig4,Galc,Gba,Gls,Gnptab,Gns,Grn,Hax1,Hfe,Hgsnat,Hsd17b4,Hsf1,Htra2,Htt,Il6st,Itgb8,Kmt2a,Lifr,Lig3,Ltn1,Map2k1,Mapk1,Mgrn1,Mpp5,Nbn,Ncdn,Ncstn,Ndrg2,Ndufs4,Nf1,Nfe2l2,Npc1,Ntrk2,Pdcd10,Pdcd6ip,Pdgfb,Pea15a,Pex13,Pi4…
MP:0011101	prenatal lethality, incomplete penetrance	7.5e-09	4.26e-07	203	4421	Common	Abca3,Abhd16a,Acadl,Adcy7,Add1,Adgrg6,Aebp1,Aifm1,Angptl4,Ank3,Aqp1,Arhgef12,Arl3,Arnt,Asxl2,Atp2a2,Atp2b1,Atp7a,Atr,Atrx,Bcl2l1,Bcl6,Bicc1,Bmp4,Bmpr2,Brca2,Brpf1,Casp3,Casp9,Cavin1,Cbl,Ccdc47,Cdk2,Cebpb,Cep290,Chm,Cntn1,Col4a1,Col4a2,Commd9,Cplane1,Crebbp,Ctnnb1,Ctsd,Dag1,Dbnl,Dhcr24,Dhx58,Dido1,Dll4,Dnmt1,E2f3,Ebp,Eef1e1,Eif2ak3,Epas1,Ets1,Ext1,Fbl,Fgfr1,Fkbp4,Fn1,Fubp1,Galnt1,Gars,Gata6,Gja1,G…
MP:0002419	abnormal innate immunity	7.82e-09	4.41e-07	320	4421	Common	Abca1,Abhd16a,Adam17,Ahr,Akr1a1,Alox5ap,Angptl2,Anpep,Anxa1,Arhgap15,Arhgap25,Arhgef1,Arhgef2,Atg16l1,Atg9a,Atm,Atp6v1h,B4galt1,Bcl3,Bcr,Birc3,Bloc1s6,Bmpr1a,Btk,C3,C3ar1,C5ar1,C9orf72,Camk2g,Capg,Casp3,Casp4,Cav1,Ccl2,Ccr1,Ccr5,Cd14,Cd163,Cd200,Cd36,Cd44,Cd47,Cd55,Cd59a,Cd68,Cd81,Cd93,Cdkn1a,Cebpb,Cebpg,Cfh,Cfp,Chuk,Ciita,Clcn3,Clic4,Cln3,Cmklr1,Cnpy3,Coro1a,Cry2,Csf1,Cspg4,Ctsc,Ctsk,Ctsl,Cttn,C…
MP:0006387	abnormal T cell number	9.8e-09	5.49e-07	468	4421	Common	4933434E20Rik,Abcb1a,Acaca,Ace,Acp2,Acsl3,Adam10,Adam17,Adpgk,Aff1,Akap9,Aldh2,Anpep,Ap1g1,Ap4e1,Apc,Apex2,Arap2,Arhgdib,Arhgef1,Arhgef6,Arid1b,Arid4a,Arid5a,Arid5b,Aspm,Atg3,Atg5,Atg7,Atm,Atp11a,Atp13a2,Atp5f1,Atr,B2m,Bap1,Bax,Bcl10,Bcl2l1,Bcl3,Bcl6,Bclaf1,Becn1,Bhlhe40,Birc3,Blnk,Bmi1,Bnip2,Braf,Brpf1,Btk,Cacybp,Cadm1,Caml,Casc4,Casp3,Casp8,Cbl,Cbx4,Ccdc127,Ccl2,Ccnd3,Ccr1,Ccr5,Cd1d1,Cd22,Cd274…
MP:0001586	abnormal erythrocyte cell number	1.12e-08	6.23e-07	167	4421	Common	Abcb10,Aco1,Acp2,Actl6a,Adam10,Adam17,Adamts7,Agap1,Ago2,Aldh3a2,Ap4e1,Apex2,Arid4a,Arnt,Asah1,Atmin,Atp8a1,B4galt1,Bmp4,Bnip3l,Braf,Btg2,Casp8,Ccnd3,Cdk5rap2,Cdk6,Chd2,Ciapin1,Col4a1,Col4a2,Cpeb4,Dcbld2,Ddrgk1,Dhx36,Dido1,Dnajc11,Dnase2a,Dpy19l3,E2f4,Egln1,Elk4,Emg1,Ep400,Epas1,Exoc6,Fam107b,Fam53b,Fbxo7,Fbxw7,Fech,Fgfrl1,Fli1,Foxo3,G6pdx,Glg1,Gpi1,Gpr183,Gse1,Hgf,Hint1,Hk1,Hmox1,Hprt,Hyal2,Id1,…
MP:0000438	abnormal cranium morphology	1.14e-08	6.32e-07	344	4421	Common	4930453N24Rik,4933434E20Rik,Abhd5,Acvr1,Acvr1b,Acvr2a,Adamts2,Adcy9,Agap1,Akap9,Akr1a1,Aldh1a3,Alkbh1,Ank,Ankrd11,Antxr1,Anxa1,Ap2b1,Apaf1,Apc,Arid1a,Arid5b,Ate1,Atmin,Atpaf2,Atr,Atxn1l,Baz1b,Bbx,Bicd2,Bmp1,Bmp4,Bmper,Bmpr1a,Bnc2,Braf,Brd2,Brd4,Cask,Casp3,Ccl2,Cdc42,Cdc73,Cdk5rap2,Cdkn1b,Cdo1,Cdon,Cebpb,Cep290,Chd7,Chrd,Chuk,Cir1,Cnbp,Cnnm4,Col27a1,Coro1c,Cplane1,Crebbp,Crkl,Csf1,Csf1r,Csnk1g3,Cs…
MP:0002874	decreased hemoglobin content	1.42e-08	7.8e-07	120	4421	Common	Abcb10,Aco1,Actl6a,Adam10,Adgrf5,Ago2,Aldh3a2,Ap4e1,Arnt,Asns,Atp6v1b2,B4galt1,C9orf72,Cd47,Chd2,Chordc1,Ciapin1,Cln6,Col4a1,Col4a2,Cp,Ddrgk1,Dhx36,Dkc1,Dock10,Dpy19l3,Dusp3,Eif2b3,Epas1,Exoc6,Fbxo7,Fech,Fgfrl1,Fkbp10,Gapdh,Gba,Golga3,Hk1,Hmox1,Hprt,Hyal2,Idh1,Ikzf1,Il10rb,Ireb2,Irf8,Itgb3,Jak2,Jmjd6,Kat14,Kdm6a,Kitl,Klf3,Kmt2a,Kmt2e,Lama4,Ldha,Lgmn,Lmo2,Lpin2,Mcat,Mcm3,Miga2,Mpv17,Mtus1,Myl12b,M…
MP:0001732	postnatal growth retardation	1.53e-08	8.33e-07	467	4421	Common	4930453N24Rik,Abcc9,Acox1,Acp2,Acsl3,Acss1,Acvr1b,Adam17,Adgrg6,Adk,Aebp1,Ahi1,Ahr,Aifm1,Alkbh1,Ap1g1,Apc,Apex2,Aqp1,Arhgap1,Arid1b,Arid5b,Asah1,Ash1l,Asl,Asxl2,Ate1,Atg5,Atm,Atox1,Atp7a,Atp8b1,Atr,Atrn,Atxn1,B4galt1,Bace1,Bag3,Bckdk,Bcl6,Bdnf,Bmi1,Bnip3l,Braf,Brd4,C1galt1c1,Cap2,Cask,Cav1,Cc2d2a,Ccdc88a,Cd2ap,Cd36,Cdc42,Cdo1,Cep290,Cep63,Cfl1,Cfl2,Chd2,Chd7,Chuk,Cisd2,Clcn3,Clip2,Cnpy3,Creb3l1,C…
MP:0008251	abnormal phagocyte morphology	1.56e-08	8.46e-07	423	4421	Common	4933434E20Rik,Abcd1,Abhd12,Acbd5,Acp2,Actl6a,Adam10,Adam17,Adam8,Adgrf5,Adipoq,Agap1,Ahr,Aimp1,Akna,Akr1a1,Ank,Ankrd11,Ankrd27,Ap4e1,Apc,App,Arhgap15,Arhgap22,Arhgap25,Arhgef1,Arid4a,Arsa,Asah1,Asl,Atg16l1,Atp2a2,Atp6v0d2,Atp6v1h,B4galt1,Bag3,Bap1,Bcl3,Bcor,Bcr,Birc3,Bmpr1a,Bnip2,Brpf1,Btk,C1qtnf7,C3,C3ar1,C4b,C5ar1,C9orf72,Casp8,Cav1,Ccl2,Ccm2,Ccr1,Ccr5,Cd200,Cd44,Cd47,Cd59a,Cd68,Cd81,Cdh5,Cdkn1…
MP:0010454	abnormal truncus arteriosus septation	1.57e-08	8.48e-07	73	4421	Common	Acvr1,Adam19,Arid1a,Ate1,Atmin,Bmp4,Bmpr1a,Bmpr2,Brd2,Cc2d2a,Chrd,Col4a3bp,Cplane1,Dhx35,Dicer1,Dock1,Dvl2,Ece1,Ednra,Fbln1,Fgfr2,Flna,Foxp1,Fuz,Gata6,Hand2,Hoxa3,Hprt,Ift140,Ift88,Jun,Kmt2d,Lama5,Lrp1,Ltbp1,Map2k5,Mapk1,Meis2,Mkl2,Morc2a,Ndst1,Nf1,Nrp1,Ntf3,Nxn,Parva,Pcsk5,Pcsk6,Pdgfra,Plxnd1,Pnn,Ptpn11,Qsox1,Rdh10,Sema3c,Setd5,Sh3pxd2a,Smad6,Smo,Snx17,Spry2,Srf,Ssr1,Ssr2,Tab1,Tbx2,Tcf7l2,Tgfb2,…
MP:0011706	abnormal fibroblast migration	1.6e-08	8.59e-07	35	4421	Common	2700049A03Rik,Appl1,Appl2,Arhgef28,Arid5b,Arpc3,Chuk,Coro7,Cyld,Dlc1,Egfr,Flnb,Fndc3b,Ikbkb,Itgb1,Map3k1,Mrc2,Mtss1,Ncoa3,Nfkb2,Palld,Pdgfrb,Plec,Ptk2,Rapgef1,Raph1,S1pr1,Sdc4,Sgpl1,Ston1,Strip1,Syne2,Tgs1,Zfand5,Zyx
MP:0005460	abnormal leukopoiesis	1.65e-08	8.77e-07	365	4421	Common	Adam10,Adam17,Aff1,Akap13,Apc,Arhgap17,Arid4a,Arid5b,Atm,Atmin,Bad,Bap1,Bax,Bcl10,Bcl2l1,Bcl3,Bcl6,Bhlhe40,Birc3,Blnk,Bmi1,Bnip3l,Bst1,Btk,C3ar1,Cadm1,Carm1,Casp8,Cbl,Cbx4,Ccnd3,Cd1d1,Cd22,Cd274,Cd36,Cd37,Cd59a,Cd72,Cd74,Cd81,Cd83,Cd86,Cdk6,Cflar,Chd4,Chordc1,Ciita,Cops5,Crebbp,Csf1r,Csk,Ctcf,Ctnnbl1,Ctsd,Cux1,Cxcl12,Cxcr4,Cyld,Dck,Ddx58,Def6,Dhx36,Dicer1,Dll4,Dnajc11,Dnmt1,Dock10,Dock2,Drosha,Dy…
MP:0001259	abnormal body weight	1.8e-08	9.53e-07	1047	4421	Common	Aars,Abca1,Abcb1a,Abcc10,Abcc4,Abcc9,Abhd16a,Abhd5,Acacb,Acadvl,Acan,Ace,Acot13,Acox1,Acp1,Acp2,Acsl3,Acsl4,Acss1,Acvrl1,Adam17,Adamts1,Adarb1,Adcy3,Add1,Adgrf5,Adh1,Adipoq,Adipor2,Adk,Aebp1,Aff4,Aga,Ago1,Ahi1,Ahnak,Ahr,Aifm1,Akap11,Akap6,Akap9,Akr1b3,Aldh2,Alms1,Als2,Amfr,Ampd2,Angptl2,Ank,Ank2,Ankrd11,Ankrd26,Anxa1,Anxa2,Anxa6,Anxa7,Ap1g1,Ap1s2,Apc,App,Aqp1,Araf,Arcn1,Arhgap1,Arhgap25,Arhgef11,…
MP:0002189	abnormal myocardial trabeculae morphology	2.14e-08	1.12e-06	93	4421	Common	Acvrl1,Adam17,Adgrg6,Adm,Akap13,Arid1a,Baz1b,Braf,Btaf1,Casp8,Cenpf,Cflar,Daam1,Ddx3x,Dll4,Dmd,Dnaja3,Efnb2,Egln1,Ep300,Ephb4,Erbb2,Ezh2,Fgfr2,Foxo1,Gja1,Gnaq,Gys1,Hand2,Hdac2,Hif1a,Hspb7,Itgav,Jarid2,Jmjd6,Jup,Kdm6a,Kifap3,Lats2,Lemd2,Map2k5,Map3k3,Map3k7,Mapk14,Mapk7,Med1,Med24,Mef2c,Megf8,Myh10,Naca,Nae1,Ncoa6,Nfat5,Notch2,Nprl3,Nr2f2,Ntf3,Pdcd10,Pdlim3,Por,Pparg,Ptprb,Ptprj,Rb1cc1,Rbp4,Rbpj,R…
MP:0010650	abnormal aorticopulmonary septum morphology	2.31e-08	1.2e-06	64	4421	Common	Acvr1,Adam19,Arid1a,Ate1,Bmp4,Bmpr1a,Bmpr2,Brd2,Cc2d2a,Chrd,Col4a3bp,Cplane1,Dhx35,Dicer1,Dock1,Dvl2,Ece1,Ednra,Flna,Foxp1,Fuz,Gata6,Hand2,Hoxa3,Hprt,Ift140,Ift88,Jun,Kmt2d,Lama5,Lrp1,Ltbp1,Mapk1,Meis2,Mkl2,Morc2a,Ndst1,Nf1,Nrp1,Ntf3,Nxn,Parva,Pcsk5,Pcsk6,Pdgfra,Plxnd1,Pnn,Ptpn11,Qsox1,Rdh10,Sema3c,Setd5,Sh3pxd2a,Smo,Snx17,Spry2,Srf,Ssr1,Ssr2,Tab1,Tgfbr2,Trp53,Vegfa,Wnt5a
MP:0010651	aorticopulmonary septal defect	2.31e-08	1.2e-06	64	4421	Common	Acvr1,Adam19,Arid1a,Ate1,Bmp4,Bmpr1a,Bmpr2,Brd2,Cc2d2a,Chrd,Col4a3bp,Cplane1,Dhx35,Dicer1,Dock1,Dvl2,Ece1,Ednra,Flna,Foxp1,Fuz,Gata6,Hand2,Hoxa3,Hprt,Ift140,Ift88,Jun,Kmt2d,Lama5,Lrp1,Ltbp1,Mapk1,Meis2,Mkl2,Morc2a,Ndst1,Nf1,Nrp1,Ntf3,Nxn,Parva,Pcsk5,Pcsk6,Pdgfra,Plxnd1,Pnn,Ptpn11,Qsox1,Rdh10,Sema3c,Setd5,Sh3pxd2a,Smo,Snx17,Spry2,Srf,Ssr1,Ssr2,Tab1,Tgfbr2,Trp53,Vegfa,Wnt5a
MP:0011805	decreased cell migration	2.52e-08	1.3e-06	43	4421	Common	2700049A03Rik,Aggf1,Appl1,Appl2,Arhgef28,Arid5b,Arpc3,Cd22,Chuk,Clic4,Cyld,Dcbld2,Egfr,Esyt2,Flnb,Fndc3b,Ikbkb,Itgb1,Map3k1,Mcu,Mcur1,Mrc2,Mtss1,Ncoa3,Nfkb2,Palld,Pecam1,Plec,Ppm1a,Ptk2,Rapgef1,Raph1,S1pr1,Sdc4,Sgpl1,Sox9,Stat3,Strip1,Syne2,Tgs1,Vcam1,Zfand5,Zyx
MP:0002116	abnormal craniofacial bone morphology	2.75e-08	1.41e-06	352	4421	Common	4930453N24Rik,4933434E20Rik,Abhd5,Acan,Acvr1,Acvr1b,Acvr2a,Adamts2,Adcy9,Agap1,Akap9,Akr1a1,Aldh1a3,Alkbh1,Ank,Ankrd11,Antxr1,Anxa1,Ap2b1,Apaf1,Apc,Arid1a,Arid5b,Ate1,Atmin,Atpaf2,Atr,Atxn1l,Axin1,Baz1b,Bbx,Bicd2,Bmp1,Bmp4,Bmper,Bmpr1a,Bnc2,Braf,Brd2,Brd4,Cask,Casp3,Ccl2,Cdc42,Cdc73,Cdk5rap2,Cdkn1b,Cdo1,Cdon,Cebpb,Cep290,Chd7,Chrd,Chsy1,Chuk,Cir1,Cnbp,Cnnm4,Col27a1,Coro1c,Cplane1,Creb3l2,Crebbp,C…
MP:0011099	lethality throughout fetal growth and development, complete penetrance	2.95e-08	1.5e-06	139	4421	Common	Acvrl1,Adgra2,Adgrl2,Adm,Ambra1,Apaf1,Arih2,Ate1,Atmin,Bmpr2,Brd1,Brd7,Cacna1c,Calcrl,Cdc42,Cdh5,Col4a1,Col4a2,Crkl,Ctbp2,Cul4b,Cul7,Dicer1,E2f3,Elavl1,Epas1,Fgfr1,Flna,Foxp1,Fuz,Gab1,Gabpa,Gbe1,Ggnbp2,Gja1,Glrx3,Gsk3b,Gsn,Hand2,Hgf,Ick,Ift140,Ikbkb,Ikzf1,Il6st,Itgb1,Jak2,Jarid2,Jun,Jup,Kat6a,Kdm6a,Kdr,Kidins220,Kitl,Klf3,Kmt2a,Lama5,Lig1,Map3k4,Mapk1,Mapk14,Mcm4,Megf8,Meis1,Meis2,Met,Mfn2,Mkl2,M…
MP:0005017	decreased B cell number	3.25e-08	1.65e-06	238	4421	Common	Ackr3,Acsl3,Actl6a,Adam10,Adam17,Aff1,Akap13,Akap9,Apex2,Arhgap17,Arhgdib,Arhgef1,Arhgef6,Arid4a,Atg7,Atm,Atmin,B3gnt5,Bad,Bcl10,Bcl3,Bcl6,Birc3,Blnk,Bmi1,Bst1,Btk,Casp8,Ccnd3,Cd22,Cd274,Cd59a,Cd72,Cd74,Cd81,Cd84,Cd86,Cds2,Cog6,Coro1a,Crebbp,Csf1,Cux1,Cxcl12,Cxcr4,Cyld,Dapp1,Dck,Ddhd1,Diaph1,Dicer1,Dkc1,Dnajc11,Dock10,Dock2,Dock8,Dynll1,Dyrk1a,Ebf1,Elk4,Ell2,Elmo1,Ep300,Eps15,Erg,Esr1,Ets1,Etv6,E…
MP:0002458	abnormal B cell number	3.26e-08	1.65e-06	307	4421	Common	2310022B05Rik,Ackr3,Acp2,Acsl3,Actl6a,Adam10,Adam17,Adpgk,Aff1,Akap13,Akap9,Ano10,Apex2,Arhgap17,Arhgap22,Arhgdib,Arhgef1,Arhgef6,Arid4a,Atg7,Atm,Atmin,Atp11a,B3gnt5,Bad,Bax,Bcl10,Bcl3,Bcl6,Bclaf1,Birc3,Blnk,Bmi1,Bst1,Btk,Casp8,Ccdc127,Ccnd3,Cd22,Cd274,Cd36,Cd59a,Cd72,Cd74,Cd81,Cd84,Cd86,Cdkn1a,Cdkn2c,Cds2,Cflar,Clec4d,Clpp,Cog6,Coro1a,Crebbp,Crls1,Csf1,Cux1,Cxcl12,Cxcr4,Cyld,Dapp1,Dck,Ddhd1,Def6…
MP:0008171	abnormal mature B cell morphology	3.53e-08	1.77e-06	308	4421	Common	2310022B05Rik,Ackr3,Acp2,Acsl3,Actl6a,Adam10,Adam17,Adpgk,Aff1,Akap13,Akap9,Ano10,Apex2,Arhgap17,Arhgap22,Arhgdib,Arhgef1,Arhgef6,Arid4a,Atg7,Atm,Atmin,Atp11a,B3gnt5,Bad,Bax,Bcl10,Bcl3,Bcl6,Bclaf1,Birc3,Blnk,Bmi1,Bst1,Btk,Casp8,Ccdc127,Ccnd3,Cd22,Cd274,Cd36,Cd59a,Cd72,Cd74,Cd81,Cd84,Cd86,Cdkn1a,Cdkn2c,Cds2,Cflar,Clec4d,Clpp,Cog6,Coro1a,Crebbp,Crls1,Csf1,Cux1,Cxcl12,Cxcr4,Cyld,Dapp1,Dck,Ddhd1,Def6…
MP:0002633	persistent truncus arteriosis	3.7e-08	1.84e-06	63	4421	Common	Acvr1,Arid1a,Ate1,Bmp4,Bmpr1a,Bmpr2,Brd2,Cc2d2a,Chrd,Col4a3bp,Cplane1,Dhx35,Dicer1,Dock1,Dvl2,Ece1,Ednra,Flna,Foxp1,Fuz,Gata6,Hand2,Hoxa3,Hprt,Ift140,Ift88,Jun,Kmt2d,Lama5,Lrp1,Ltbp1,Mapk1,Meis2,Mkl2,Morc2a,Ndst1,Nf1,Nrp1,Ntf3,Nxn,Parva,Pcsk5,Pcsk6,Pdgfra,Plxnd1,Pnn,Ptpn11,Qsox1,Rdh10,Sema3c,Setd5,Sh3pxd2a,Smo,Snx17,Spry2,Srf,Ssr1,Ssr2,Tab1,Tgfbr2,Trp53,Vegfa,Wnt5a
MP:0003156	abnormal leukocyte migration	3.89e-08	1.93e-06	102	4421	Common	Adam17,Angptl2,Anxa8,Arhgap25,B4galt1,B4gat1,Capn1,Ccl2,Ccr1,Ccr5,Cd163,Cd36,Cd44,Cd99l2,Cdh5,Cdkn1a,Chst2,Chuk,Cmklr1,Coro1a,Csf1,Ctsc,Cttn,Cx3cr1,Cxcr4,Cytip,Diaph1,Dock2,Dock8,Edil3,Elavl1,Esam,Evl,F3,Fas,Flt1,Fmnl1,Fscn1,Fyb,Galnt1,Gcnt1,Glb1,Glg1,Gnai2,Hif1a,Icam1,Ikbkb,Il33,Il4ra,Inpp5d,Itga4,Itgal,Itgam,Itgb2,Itgb3,Itgb7,Jam3,Jmjd6,Lgals3,Litaf,Lrch1,Mcoln2,Mmp28,Myh9,Myo9b,Ndrg2,Ndst1,Ned…
MP:0000432	abnormal head morphology	3.91e-08	1.93e-06	439	4421	Common	2700049A03Rik,4930453N24Rik,Acan,Acvr1,Acvr1b,Acvr2a,Acvrl1,Adamts2,Adamts6,Adgra2,Akap9,Akr1a1,Aldh1a3,Alkbh1,Ank,Antxr1,Ap2b1,Ap3b1,Apaf1,Apc,App,Arhgap29,Arhgef2,Arid1a,Arid5b,Arnt,Aspa,Aspm,Atp11a,Atp2c1,Atr,Axin1,Baz1b,Bbs4,Bbx,Bcor,Bdnf,Bmp4,Bmpr1a,Bnc2,Braf,Brd2,Btaf1,Cask,Casp3,Casp9,Cbl,Cc2d2a,Ccl2,Cdc42,Cdk5rap2,Cdkn1b,Cdo1,Cdon,Cep290,Cep63,Chd7,Chrd,Chuk,Cisd2,Ckap5,Cnnm4,Col27a1,Col4…
MP:0010426	abnormal heart and great artery attachment	4.08e-08	2e-06	138	4421	Common	4933434E20Rik,Ackr3,Acvr1,Adam19,Adamts6,Anks6,Ap2b1,Arid1a,Arid2,Ate1,Atg16l1,Atp11a,Baz1b,Bicc1,Bmp4,Bmpr1a,Bmpr2,Brd2,Cc2d2a,Cep290,Chrd,Cir1,Cntrl,Col4a2,Col4a3bp,Cplane1,Crkl,Daam1,Dctn5,Dhrs3,Dhx35,Dicer1,Dnm2,Dock1,Dvl2,Ece1,Edn1,Ednra,Ephb4,Ermp1,Evl,Fbln1,Fgfr2,Flna,Foxp1,Fuz,Gata6,Gja5,H13,Hand2,Hectd1,Hoxa3,Hprt,Hspg2,Ift140,Ift74,Ift88,Invs,Jag1,Jarid2,Jmjd6,Jun,Kat6a,Kmt2d,Lama5,Lrp1…
MP:0008271	abnormal bone ossification	4.12e-08	2.01e-06	230	4421	Common	2700049A03Rik,Acp2,Acvr1,Adipoq,Aldh2,Alkbh1,Ank,Ano6,Apaf1,Apc,Arid5b,Asah1,Atp2b1,Atp6v1h,Babam2,Bgn,Bmp6,Bmpr1a,Bmpr2,Casp3,Cav1,Cd68,Cdc42,Cebpb,Chuk,Cisd2,Clk1,Cnot3,Col12a1,Col1a2,Creb3l1,Crebbp,Crtap,Csf1,Csf1r,Ctgf,Ctnna1,Ctnnb1,Ctsk,Cul7,Dchs1,Ddr1,Ddx52,Dhrs3,Dicer1,Dkk2,Dusp6,Ebf1,Ednrb,Efnb1,Ehmt1,Eif2ak3,Elavl1,Elk4,Enpp1,Epc1,Errfi1,Esr1,Ext2,Fam117b,Fam20c,Fat4,Fermt2,Fgfr1,Fgfr2,F…
MP:0003634	abnormal glial cell morphology	4.16e-08	2.02e-06	220	4421	Common	Abcd1,Abhd12,Acot7,Acp2,Adgrg1,Adgrg6,Adk,Aff1,Aga,Aldh2,Als2,App,Arsa,Aspa,Aspm,Atg7,Atmin,Atp13a2,Atr,Atrn,B4gat1,Bad,Basp1,Bid,Bmi1,Bmp4,Braf,Brpf1,Cadm1,Canx,Cav1,Ccm2,Cd200,Cd81,Cdc42,Cdh2,Cdkn1b,Clcn3,Cln3,Cln6,Cln8,Cnp,Cntn1,Col4a1,Coq9,Cp,Csf1,Csf1r,Ctsd,Ctsf,Cx3cr1,Dag1,Depdc5,Dmd,Dnajc5,Dner,Dst,Ei24,Eif2b4,Eif2b5,Eml1,Erbb2,Ezh2,Fgfr1,Fgfr2,Fig4,Fkrp,Foxp2,Galc,Gba,Gja1,Glb1,Gli3,Gls,G…
MP:0008250	abnormal myeloid leukocyte morphology	4.51e-08	2.17e-06	488	4421	Common	4933434E20Rik,Abcb1a,Abcd1,Abhd12,Abhd5,Acbd5,Acp2,Actl6a,Adam10,Adam17,Adam8,Adgre5,Adgrf5,Adipoq,Agap1,Ahr,Aimp1,Akna,Akr1a1,Ank,Ankrd11,Ankrd27,Ap4e1,Apc,App,Arhgap15,Arhgap22,Arhgap25,Arhgef1,Arhgef5,Arid4a,Arsa,Asah1,Asl,Atg16l1,Atp11a,Atp2a2,Atp6v0d2,Atp6v1h,B4galt1,B4gat1,Bag3,Bap1,Bcl3,Bcl6,Bcor,Bcr,Birc3,Bmpr1a,Bnip2,Brpf1,Btk,C1qtnf7,C3,C3ar1,C4b,C5ar1,C9orf72,Casp8,Cav1,Ccl2,Ccm2,Ccr1,…
MP:0002183	gliosis	4.56e-08	2.18e-06	120	4421	Common	Abcd1,Abhd12,Acot7,Acp2,Adk,Aff1,Aga,Aldh2,Als2,App,Arsa,Aspa,Atg7,Atmin,Atp13a2,Atrn,Bad,Bid,Bmi1,Canx,Cav1,Ccm2,Clcn3,Cln3,Cln6,Cln8,Cnp,Cntn1,Col4a1,Coq9,Csf1r,Ctsd,Ctsf,Cx3cr1,Dag1,Depdc5,Dnajc5,Dst,Ei24,Fig4,Galc,Gba,Glb1,Gnptab,Gns,Grn,Hax1,Hexb,Hfe,Hgsnat,Hsd17b4,Htra2,Htt,Inpp4a,Itgav,Jam3,Lbr,Lrrk2,Ltn1,Mapk1,Mgrn1,Mpp5,Myo7a,Ncstn,Ndufs4,Nf1,Nfe2l2,Notch3,Npc1,Ntrk2,Opa1,Pdcd10,Pdcd6ip,…
MP:0010425	abnormal heart and great vessel attachment	4.93e-08	2.35e-06	139	4421	Common	4933434E20Rik,Ackr3,Acvr1,Adam19,Adamts6,Anks6,Ap2b1,Arid1a,Arid2,Ate1,Atg16l1,Atp11a,Baz1b,Bicc1,Bmp4,Bmpr1a,Bmpr2,Brd2,Cc2d2a,Cep290,Chrd,Cir1,Cntrl,Col4a2,Col4a3bp,Cplane1,Crkl,Daam1,Dctn5,Dhrs3,Dhx35,Dicer1,Dnm2,Dock1,Dvl2,Ece1,Edn1,Ednra,Ephb4,Ermp1,Evl,Fbln1,Fgfr2,Flna,Foxp1,Fuz,Gata6,Gja5,H13,Hand2,Hectd1,Hoxa3,Hprt,Hspg2,Ift140,Ift74,Ift88,Invs,Jag1,Jarid2,Jmjd6,Jun,Kat6a,Kmt2d,Lama5,Lrp1…
MP:0003077	abnormal cell cycle	5.21e-08	2.47e-06	171	4421	Common	Aifm1,Aspm,Atm,Atr,B3gat3,B4galt1,Birc6,Bmi1,Brca2,Brd2,Brpf1,Btrc,Bub3,Cacybp,Cbx7,Ccnc,Cdk2,Cdk4,Cdk5rap2,Cdkn1a,Cenpc1,Cenpe,Cep63,Chd2,Chd4,Chfr,Cops5,Cops8,Ctnna1,Ctnnd1,Cul3,Cul4a,Dcaf1,Ddx3x,Dhx36,Dicer1,Dido1,Dyrk1a,E2f3,E4f1,Ednrb,Eef1e1,Egr1,Eif6,Eml1,Eya1,Foxk1,Gabpa,Gadd45a,Gas2l3,Gigyf2,Glrx3,Gnl3,Gpx1,Hand2,Hat1,Haus6,Hdac1,Hdac3,Hipk2,Hmgn1,Hspb1,Hus1,Ift122,Ing1,Ino80,Itgb1,Jdp2,K…
MP:0004087	abnormal muscle fiber morphology	6.26e-08	2.95e-06	234	4421	Common	Aars,Abca5,Abcb8,Abcc9,Acadm,Acadvl,Ackr3,Adam17,Adarb1,Adipoq,Agtpbp1,Aifm1,Akap12,Akap13,Akap6,Als2,App,Asl,Ate1,Atg5,Bag3,Bcar1,Bcl6,Bin1,Bmp4,Braf,Cacna1c,Camk2d,Cap2,Cast,Cav1,Cav2,Cd47,Cdh2,Cdkn1b,Cebpb,Cenpf,Cfl2,Chd2,Cisd2,Clcc1,Clu,Cnot3,Col12a1,Col15a1,Col6a1,Col6a3,Cox15,Cryab,Csrp2,Ctsl,Ctss,Daam1,Dag1,Ddr2,Des,Dicer1,Dmd,Dnaja3,Dnm1l,Dnm2,Dock1,Dst,Dtna,Dusp1,Dusp6,Dysf,Egfr,Egln1,Em…
MP:0004174	abnormal spine curvature	6.99e-08	3.28e-06	167	4421	Common	Acan,Acp2,Agl,Ank,Ankrd11,Arhgap1,Arl6ip5,Ate1,Atr,Atxn1,Atxn1l,Atxn7,Bmp4,Braf,Brd2,Cask,Cdc14b,Cdk5rap2,Cdk7,Cdo1,Chd2,Cir1,Cisd2,Clcn3,Cnp,Col12a1,Col1a2,Col27a1,Col5a2,Crebbp,Crtap,Dchs1,Dhx35,Dicer1,Dvl2,Dym,Efemp1,Enpp1,Ercc1,Ext1,Fat1,Fat4,Fbn1,Fermt2,Flnb,Fosl2,Foxn3,Fstl1,Gba,Gli3,Gnptab,Gtf2ird1,H2-Eb1,Hip1,Hspg2,Ikbkap,Irak3,Ireb2,Itga7,Itgb1,Itpk1,Jun,Kat14,Kdm6b,Kif1b,Lama2,Large1,La…
MP:0002224	abnormal spleen size	8.47e-08	3.95e-06	369	4421	Common	Abca1,Abcc10,Abcc4,Adam10,Adam17,Adh5,Ago2,Ahr,Aif1,Akap13,Ap1b1,Arhgap1,Arhgef1,Arid4a,Arid5b,Asah1,Asb1,Ascc2,Atg3,Atl2,Atm,Atmin,Atr,B3gnt5,B4galt1,Bag3,Bap1,Bax,Bcl3,Bcl6,Bhlhe40,Blnk,Bmi1,Bnip3l,Bok,Braf,Brca2,Bscl2,Btk,C4b,C9orf72,Cacybp,Casp8,Cbl,Cd2ap,Cd47,Cd72,Cd86,Cdc73,Cdk6,Cdkn1a,Cdkn1b,Cdkn2c,Cebpb,Cep290,Cflar,Chd2,Chd4,Chordc1,Ciz1,Coro1a,Cpox,Crebbp,Csf1,Csf1r,Ctc1,Ctsa,Cul4a,Cxcr…
MP:0002827	abnormal renal corpuscle morphology	9.16e-08	4.25e-06	175	4421	Common	Abca1,Ace,Adipoq,Adm,Aga,Ampd2,Arhgap35,Arid5b,Ash1l,Asl,Atp6ap2,Atp7a,Atr,Bag6,Bcam,Bcr,Bhlhe40,Bicc1,Bmp4,Bmper,C1qa,C3,C4b,Ccni,Ccr1,Cd1d1,Cd2ap,Cd55,Cd72,Cdc42,Cdkn1a,Cdkn2c,Cebpb,Cfh,Cfl1,Chd2,Clu,Col4a1,Coro1a,Coro2b,Crim1,Ctdnep1,Ctnnd1,Dcn,Ddr1,Dicer1,Dkc1,Dlg1,Egln1,Ep300,Esr1,Fam20c,Fas,Fat1,Fbln1,Fcgr2b,Fgfr2,Fgfrl1,Flcn,Gadd45a,Glb1,Glis2,Gne,Golm1,Gpx7,Grk6,Gusb,Hmox1,Hp,Hr,Ifih1,Ift…
MP:0008248	abnormal mononuclear phagocyte morphology	9.32e-08	4.3e-06	333	4421	Common	4933434E20Rik,Abcd1,Abhd12,Acbd5,Acp2,Actl6a,Adam17,Adam8,Adgrf5,Adipoq,Agap1,Ahr,Aimp1,Akr1a1,Ank,Ankrd11,Ap4e1,Apc,App,Arhgap15,Arhgap22,Arhgef1,Arid4a,Arsa,Asah1,Asl,Atg16l1,Atp2a2,Atp6v0d2,Atp6v1h,Bap1,Bcl3,Birc3,Bmpr1a,Bnip2,Brpf1,C1qtnf7,C3,C3ar1,C4b,C5ar1,Casp8,Cav1,Ccl2,Ccm2,Ccr1,Ccr5,Cd200,Cd44,Cd47,Cd59a,Cd68,Cd81,Cdkn1a,Cebpb,Cflar,Ciita,Ciz1,Clpp,Cmklr1,Cnot3,Cog6,Col4a3bp,Coro1a,Cp,C…
MP:0011703	increased fibroblast proliferation	9.84e-08	4.52e-06	32	4421	Common	Acp1,Braf,Cacybp,Cbx7,Ccdc80,Cdkn1a,Dok1,Fbxo4,Gadd45a,Hint1,Hmgn1,Hsd11b1,Htatip2,Ing1,Lum,Ndrg2,Nono,Nupr1,Pak2,Patz1,Pcbp4,Pdgfra,Phf14,Pik3ca,Pml,Rb1,Rbl1,Sulf1,Sulf2,Taf4,Trp53,Vcl
MP:0001175	abnormal lung morphology	1.16e-07	5.32e-06	308	4421	Common	Abca1,Abca3,Acan,Ackr3,Acvrl1,Adam17,Adamts2,Adcy9,Adgra2,Adgrf5,Adipoq,Aff4,Aggf1,Aimp1,Akap12,Ank3,Anks6,Ap1b1,Ap3b1,Asah1,Atf2,Atg5,Atmin,Atp7a,Atr,Atxn1l,B4galt1,Bag6,Bclaf1,Bid,Bloc1s6,Bmp4,Bmper,Bmpr1a,Bmpr2,Brd2,Capns1,Carm1,Casp8,Cav1,Cav2,Cavin1,Cavin2,Cd59a,Cdc73,Cdkn2c,Cdo1,Cebpg,Chd2,Cic,Cmklr1,Col27a1,Col3a1,Col4a2,Cplane1,Creb1,Crebbp,Cryab,Ctgf,Ctnnb1,Ctsa,Ctsk,Cux1,Cyld,Dbnl,Dchs1…
MP:0003354	astrocytosis	1.32e-07	6e-06	72	4421	Common	Abcd1,Acp2,Aga,Aldh2,Als2,App,Arsa,Aspa,Atg7,Atmin,Atp13a2,Atrn,Canx,Cav1,Clcn3,Cln6,Col4a1,Coq9,Ctsd,Dag1,Depdc5,Ei24,Fig4,Galc,Gba,Gnptab,Gns,Grn,Hax1,Hfe,Hgsnat,Hsd17b4,Htt,Ltn1,Mapk1,Mgrn1,Mpp5,Ncstn,Ndufs4,Nf1,Nfe2l2,Npc1,Ntrk2,Pdcd10,Pdcd6ip,Pex13,Pi4k2a,Pomt2,Ppt1,Prkab1,Prnp,Psap,Psmc4,Pten,Rb1,Rhot1,S1pr1,Scarb2,Scyl2,Slc33a1,Smo,Sncg,Sod1,Spg11,Tardbp,Tsc2,Tspan2,Vac14,Vegfa,Wasl,Zfp106…
MP:0003795	abnormal bone structure	1.35e-07	6.11e-06	449	4421	Common	Abhd5,Acan,Acp2,Acsl5,Adam10,Adam17,Adam8,Adar,Adgrd1,Adgrf5,Adipoq,Afap1l2,Ahcyl1,Akr1a1,Aktip,Aldh2,Ank,Ankrd11,Ano6,Anxa1,Ap4e1,Apc,Aqp1,Arhgap1,Arid4a,Arl6ip5,Arrdc1,Aspa,Atp11a,Atp2a2,Atp2b1,Atp6v0d2,Atp6v1h,Atp8b2,Atr,Atxn10,Babam2,Bbx,Bgn,Bhlhe40,Bmp3,Bmp4,Bmpr1a,Boc,Brpf1,Btd,Btrc,Bzw2,C1qtnf2,C3,C3ar1,C5ar1,Casp3,Cast,Cav1,Ccl2,Cd14,Cd36,Cd44,Cd47,Cd68,Cdc26,Cdk5rap2,Cdk7,Cdo1,Cebpb,Cers…
MP:0001711	abnormal placenta morphology	1.63e-07	7.33e-06	189	4421	Common	Abca1,Abcb7,Adam17,Adar,Adm,Ago2,Alkbh1,Arap3,Arid1a,Arnt,Atf2,Atr,Atrx,Birc6,Bptf,Braf,C3,Calcrl,Capn2,Ccdc134,Ccm2,Ccnc,Cdh5,Cdk12,Cdk7,Chm,Chuk,Commd1,Cops2,Crkl,Csnk2b,Ctbp2,Ctnnb1,Cul3,Cul4b,Cul7,Cxxc1,Cyr61,Dap3,Daxx,Ddx3x,Dhx9,Dlc1,Dll4,Dnm1l,Dph3,Egfr,Egln1,Ehmt2,Elavl1,Emg1,Emp2,Enpp2,Erg,Ern1,Ets2,Fbn1,Fbxl5,Fbxw8,Fgfr2,Fgfrl1,Fn1,Fos,Fubp1,G6pdx,Gab1,Ggnbp2,Ghr,Grb10,Grb2,Hgf,Hmgcl,Hsf…
MP:0000703	abnormal thymus morphology	1.78e-07	7.95e-06	294	4421	Common	Abca1,Abcc10,Abcc4,Adam10,Adamts6,Aff1,Ap2b1,Apc,Apex2,Araf,Arhgap1,Arhgap5,Arid5b,Asah1,Asl,Atg16l1,Atg3,Atg5,Atm,Atmin,Atp11a,Atr,Bad,Bag3,Bax,Bcl10,Bcl2l1,Bcl6,Bhlhe40,Bmi1,Bok,Braf,Brca2,Brd2,Cacybp,Caml,Carm1,Casp3,Cbl,Cbx4,Ccnd3,Cd2ap,Cdk6,Cdkn1b,Cdkn2c,Cflar,Chd4,Chd7,Chrd,Ciz1,Clec4d,Col4a2,Cops5,Coro1a,Crebbp,Crkl,Csf1,Csk,Ctc1,Ctcf,Ctsd,Ctsl,Cul4a,Cux1,Cxcr4,Cyld,Dad1,Dck,Dhrs7b,Dhx36,D…
MP:0011708	decreased fibroblast cell migration	1.8e-07	7.95e-06	31	4421	Common	2700049A03Rik,Appl1,Appl2,Arhgef28,Arid5b,Arpc3,Chuk,Cyld,Egfr,Flnb,Fndc3b,Ikbkb,Itgb1,Map3k1,Mrc2,Mtss1,Ncoa3,Nfkb2,Palld,Plec,Ptk2,Rapgef1,Raph1,S1pr1,Sdc4,Sgpl1,Strip1,Syne2,Tgs1,Zfand5,Zyx
MP:0012065	increased astrocyte number	1.8e-07	7.95e-06	75	4421	Common	Abcd1,Acp2,Aga,Aldh2,Als2,App,Arsa,Aspa,Atg7,Atmin,Atp13a2,Atrn,Bmp4,Canx,Cav1,Cd81,Clcn3,Cln6,Col4a1,Coq9,Ctsd,Dag1,Depdc5,Ei24,Fig4,Galc,Gba,Gnptab,Gns,Grn,Hax1,Hfe,Hgsnat,Hsd17b4,Htt,Ltn1,Map2k1,Mapk1,Mgrn1,Mpp5,Ncstn,Ndufs4,Nf1,Nfe2l2,Npc1,Ntrk2,Pdcd10,Pdcd6ip,Pex13,Pi4k2a,Pomt2,Ppt1,Prkab1,Prnp,Psap,Psmc4,Pten,Rb1,Rhot1,S1pr1,Scarb2,Scyl2,Slc33a1,Smo,Sncg,Sod1,Spg11,Tardbp,Tsc2,Tspan2,Vac14,…
MP:0003410	abnormal artery development	2.02e-07	8.87e-06	89	4421	Common	Acvr1,Acvrl1,Adm,Arid1a,Bmp4,Brd2,Ccm2,Cdh5,Chd7,Chrd,Col4a3bp,Commd9,Cxcl12,Cxcr4,Cyr61,Dll4,Ece1,Edn1,Ednra,Efnb2,Eng,Flnb,Flt1,Flt4,Fn1,Foxo1,H13,H2-Ab1,Hand2,Hdac7,Hif1a,Ikbkap,Itga5,Kat6a,Kat7,Kctd10,Kdr,Krit1,Lemd3,Lmo2,Ltbp1,Map3k7,Mapk7,Med24,Mef2c,Metap2,Mib1,Mkl2,Morc2a,Myocd,Notch3,Nrp1,Nsun2,Pdcd10,Pdzrn3,Pik3ca,Plekhg5,Plxnd1,Pnpla6,Poglut1,Prrc2b,Ptk2,Ptprj,Pxn,Ramp2,Rasa1,Rbpj,Rdh1…
MP:0005274	abnormal viscerocranium morphology	2.03e-07	8.91e-06	250	4421	Common	4930453N24Rik,Abhd5,Acvr1,Acvr1b,Acvr2a,Adamts2,Akap9,Akr1a1,Aldh1a3,Alkbh1,Ank,Ankrd11,Antxr1,Anxa1,Ap2b1,Apaf1,Apc,Arid1a,Arid5b,Atmin,Atpaf2,Atr,Baz1b,Bbx,Bmp1,Bmp4,Bmpr1a,Bnc2,Braf,Brd4,Cask,Ccl2,Cdc73,Cdkn1b,Cdo1,Cdon,Cep290,Chrd,Chuk,Cnbp,Cnnm4,Coro1c,Cplane1,Crebbp,Crkl,Csf1,Csf1r,Csrnp1,Ctgf,Ctnnb1,Ctsk,Ctsl,Cyp51,Daam2,Dcn,Dctn5,Ddr2,Dhrs3,Disp1,Dlg1,Dock1,Dync2h1,E2f4,Ece1,Edn1,Ednra,Ed…
MP:0003222	increased cardiomyocyte apoptosis	2.17e-07	9.44e-06	44	4421	Common	Adm,Aifm1,Akap6,Bag3,Calcrl,Casp3,Casp8,Chd7,Dicer1,Dnaja3,Dusp6,Gnaq,Hdac2,Hmox1,Inpp5f,Ivns1abp,Jup,Kifap3,Map3k1,Mapk1,Mapk14,Mapk8,Mdm4,Med1,Mtor,Myh10,Myocd,Nox4,Pak1,Phc1,Plrg1,Raf1,Rasa1,Sod2,Sos1,Srf,Stat1,Stat3,Tcap,Tfam,Ube4b,Uvrag,Ywhaq,Zfpm2
MP:0001577	anemia	2.26e-07	9.81e-06	182	4421	Common	Abcb10,Actl6a,Acvrl1,Add1,Ago2,Ap4e1,Apc,Arf6,Arhgap1,Arid4a,Bap1,Bmi1,Bnip3l,Brd1,C3,Ccdc134,Cd47,Cdk5rap2,Cflar,Chordc1,Col4a1,Cop1,Cp,Cpox,Crebbp,Dap3,Dhx36,Diaph1,Dicer1,Dido1,Dkc1,Dnase2a,E2f4,Egr1,Eif2ak1,Eng,Ep300,Ep400,Epas1,Epb41,Exoc6,Fcgr1,Fcgr2b,Fech,Fgfrl1,Fli1,Fn1,Foxo3,Fubp1,G6pdx,Gata2,Glmp,Gpc4,H2-Ab1,Hfe,Hk1,Hmox1,Hyal2,Idh1,Ikzf1,Il6st,Inhba,Inpp5d,Ireb2,Itgb1,Itgb3,Jak1,Jak2,J…
MP:0002060	abnormal skin morphology	2.62e-07	1.13e-05	458	4421	Common	Abcb10,Abcg2,Abhd5,Acp2,Acvr1b,Adam17,Adamts2,Adamts9,Adar,Adm,Aebp1,Aebp2,Ago2,Ahr,Aldh3a2,Aldh9a1,Angpt2,Ankrd1,Ap3b1,Apc,Arap3,Arnt,Arrdc3,Asb1,Ash1l,Asl,Ate1,Atf2,Atox1,Atp2a2,Atp2c1,Atp7a,Atr,B4galt1,Bap1,Bcl7a,Bdnf,Bgn,Birc6,Blmh,Bmpr1a,Braf,Brca2,Brd1,Brd4,Calcrl,Cask,Casp8,Cav1,Cbl,Ccm2,Cd109,Cd34,Cd44,Cd47,Cdc42,Cdh5,Cdk11b,Cdk7,Cdkn1a,Cebpb,Cers4,Chd2,Chuk,Cidea,Cisd2,Ckap4,Clic4,Col1a2…
MP:0011090	perinatal lethality, incomplete penetrance	2.99e-07	1.28e-05	159	4421	Common	Abca1,Ackr3,Adam10,Adam17,Adamts1,Aebp1,Apaf1,Apc,Arf6,Arhgap35,Arid5b,Arl13b,Arrdc3,Atp7a,B4gat1,Bbs4,Bcl10,Bicc1,Bmp1,Bmp4,Bmpr2,Brca2,Brd2,Card10,Carm1,Casp3,Casp9,Cavin1,Cdon,Cebpb,Chrd,Clec16a,Col12a1,Col4a1,Crebbp,Crim1,Cxcr4,Dhrs3,Dicer1,Dnajb9,Dvl2,Egfr,Epha3,Ets1,Eya1,Fbln1,Fbxo11,Fgfr1,Fli1,Flnb,Fos,Foxp2,Fubp1,Gata2,Ghr,Gja1,Gli3,Gnb1,Grb10,Gys1,Hdac2,Hip1,Hmox1,Hps1,Hspg2,Htt,Ift80,Ig…
MP:0020135	abnormal heart ventricle wall thickness	3.42e-07	1.46e-05	106	4421	Common	Aars,Adam17,Adgrg6,Adm,Akap6,Atp2a2,Bcl6,Bin1,Braf,Capn2,Casp8,Cav1,Ccm2,Cdkn1b,Cenpf,Col4a3bp,Crk,Dag1,Des,Dlc1,Dmd,Eloa,Ep300,Epas1,Erbb2,Fgfr2,Foxp1,Gab1,Gja1,Gyg,Gys1,Hccs,Hdac2,Hdac7,Hexim1,Hif1a,Hspb7,Igf2r,Il6st,Itgb1,Itpa,Jag1,Jun,Kdm6a,Leprotl1,Lig3,Map2k1,Map3k7,Mdm4,Med1,Med24,Mef2c,Mtor,Mtpn,Mybbp1a,Myh10,Myh11,Nae1,Ncoa6,Ncor2,Nfat5,Nos1ap,Nos3,Nr1d1,Nr3c1,Pak4,Pdgfa,Pdlim3,Pepd,Pfkf…
MP:0010468	abnormal thoracic aorta morphology	3.45e-07	1.47e-05	91	4421	Common	4933434E20Rik,Acvr1,Ap2b1,Atmin,Atp2a2,Atp7a,Bmp4,Bmpr2,Brd2,Chd7,Chrd,Cmip,Col4a2,Cplane1,Crim1,Crkl,Cxcr4,Dhx35,Dicer1,Dnm2,Dynll1,Ece1,Ednra,Ephb4,Ermp1,Eya1,Fbln1,Fbln5,Fbn1,Flna,Fuz,Gata6,Gja1,Gja5,H13,Hand2,Hectd1,Hprt,Hspg2,Ift140,Invs,Jag1,Jun,Kat6a,Klf15,Lama5,Lmna,Lox,Lrp1,Ltbp1,Matr3,Megf8,Mgrn1,Mkl2,Morc2a,Myo9a,Ndst1,Nprl3,Nrp1,Nsun2,Paxip1,Pcsk5,Pdgfra,Pdgfrb,Pigv,Plxnd1,Prmt7,Prrc2…
MP:0004937	dilated heart	3.51e-07	1.48e-05	151	4421	Common	Abca5,Abi1,Acadvl,Ace,Ackr3,Adam19,Adgrg6,Adipoq,Aifm1,Atg5,Atp2a2,Bag3,Baz1b,Bcl6,Cacna1c,Camk2d,Camta2,Cap2,Capns1,Cast,Cav1,Cdh2,Cenpf,Clcn3,Col1a2,Crk,Crkl,Cryab,Ctnna1,Ctsl,Cyp51,Dag1,Des,Dicer1,Dnaja3,Dnm1l,Dusp7,Edn1,Egln1,Epha3,Erbb2,F2r,Fbln5,Fbn1,Fgfr1,Fgfr2,Flna,G6pdx,Gab1,Gas2l3,Gja1,Gja5,Gnaq,Gys1,Hand2,Hccs,Hdac3,Hdac7,Hexim1,Hmox1,Hoxa3,Hsd17b7,Igf2r,Itgb1,Jag1,Jarid2,Jup,Kidins220…
MP:0003861	abnormal nervous system development	4.03e-07	1.69e-05	565	4421	Common	2700049A03Rik,Abi1,Acp2,Acvr1,Adam10,Adar,Add1,Adgra2,Adgrg1,Adgrg6,Ago2,Ahi1,Alkbh1,Ambra1,Apaf1,Apc,Aph1a,Arfgef1,Arfgef2,Arhgap32,Arhgap35,Arhgef5,Arid1a,Arid1b,Arih2,Arl13b,Arnt,Asah1,Aspm,Atmin,Atp11a,Atp2c1,Atr,Atxn1l,Axin1,B4galt2,B4gat1,Bag6,Basp1,Bax,Bbs4,Bcl10,Bcl2l2,Bcor,Bdnf,Becn1,Bicd2,Bmp4,Bmper,Bmpr1a,Bmpr1b,Braf,Brca2,Brd1,Brd2,Brpf1,Btaf1,C2cd3,C330007P06Rik,Card10,Casp3,Casp8,Ca…
MP:0008469	abnormal protein level	4.44e-07	1.86e-05	557	4421	Common	Abca1,Abca6,Abcb7,Abhd5,Acaa1a,Acaca,Acad8,Ace,Acox1,Adam17,Adamts7,Adar,Adcy3,Adcy6,Adgrf5,Adpgk,Afap1l2,Agl,Ahi1,Ahr,Akap9,Aldh2,Amfr,Anapc13,Anapc4,Ank,Ano10,Ap4e1,Ap4m1,Apc,Aqp1,Arid5a,Arpc1b,Arpc4,Arrb2,Asah1,Ash1l,Asl,Atad2b,Atg16l1,Atg7,Atp6ap2,Atp6v1h,Atp7a,Atp8b1,Atp8b2,B2m,B4galt1,B4gat1,Bap1,Baz1b,Bcl6,Bcr,Bgn,Bicd1,Boc,Bpnt1,Brd2,C3,C3ar1,C5ar1,Cacybp,Camk1,Casp4,Casp8,Cav1,Ccl2,Ccr1,…
MP:0002446	abnormal macrophage morphology	4.62e-07	1.93e-05	241	4421	Common	Abcd1,Abhd12,Acp2,Actl6a,Adam17,Adam8,Adgrf5,Adipoq,Aimp1,Akr1a1,Ank,Ankrd11,Apc,App,Arhgap15,Arsa,Asah1,Asl,Atg16l1,Atp2a2,Atp6v0d2,Atp6v1h,Bcl3,Birc3,Bmpr1a,C1qtnf7,C3,C3ar1,C4b,C5ar1,Casp8,Cav1,Ccl2,Ccm2,Ccr1,Ccr5,Cd200,Cd44,Cd47,Cd59a,Cd68,Cd81,Cebpb,Cflar,Ciita,Cmklr1,Cnot3,Cp,Csf1,Csf1r,Ctbs,Ctnnb1,Ctsd,Ctsk,Ctsl,Cx3cr1,Cxcr4,Dck,Dkk2,Dnase2a,Dock2,Dok3,Ebf1,Egr1,Elavl1,Ep300,Esr1,Farp2,Fbl…
MP:0002401	abnormal lymphopoiesis	5e-07	2.08e-05	317	4421	Common	Adam10,Aff1,Akap13,Apc,Arhgap17,Arid5b,Atm,Atmin,Bad,Bax,Bcl10,Bcl2l1,Bcl3,Bcl6,Bhlhe40,Birc3,Blnk,Bmi1,Bst1,Btk,C3ar1,Cadm1,Carm1,Cbl,Cbx4,Ccnd3,Cd1d1,Cd22,Cd274,Cd36,Cd37,Cd59a,Cd72,Cd74,Cd81,Cd83,Cd86,Cdk6,Chd4,Ciita,Cops5,Crebbp,Csk,Ctcf,Ctnnbl1,Ctsd,Cux1,Cxcl12,Cxcr4,Cyld,Dck,Ddx58,Def6,Dicer1,Dll4,Dnajc11,Dnmt1,Dock10,Dock2,Drosha,Dynll1,Dyrk1a,E2f4,Ebf1,Eef1a1,Elavl1,Elf4,Elk4,Ell2,Ep300,E…
MP:0012064	abnormal astrocyte number	5.2e-07	2.14e-05	76	4421	Common	Abcd1,Acp2,Aga,Aldh2,Als2,App,Arsa,Aspa,Atg7,Atmin,Atp13a2,Atrn,Bmp4,Canx,Cav1,Cd81,Clcn3,Cln6,Col4a1,Coq9,Ctsd,Dag1,Depdc5,Ei24,Fig4,Galc,Gba,Gnptab,Gns,Grn,Hax1,Hfe,Hgsnat,Hsd17b4,Htt,Ltn1,Map2k1,Mapk1,Mgrn1,Mpp5,Ncstn,Ndrg2,Ndufs4,Nf1,Nfe2l2,Npc1,Ntrk2,Pdcd10,Pdcd6ip,Pex13,Pi4k2a,Pomt2,Ppt1,Prkab1,Prnp,Psap,Psmc4,Pten,Rb1,Rhot1,S1pr1,Scarb2,Scyl2,Slc33a1,Smo,Sncg,Sod1,Spg11,Tardbp,Tsc2,Tspan2,…
MP:0002998	abnormal bone remodeling	5.21e-07	2.14e-05	108	4421	Common	Adam17,Adam8,Adipoq,Akr1a1,Ank,Ano6,Atp6v0d2,Atp6v1h,Bmpr1a,Casp3,Cd47,Cd68,Cebpb,Ciita,Cnot3,Col12a1,Crtap,Cry2,Csf1,Csf1r,Ctnnb1,Ctsk,Ctsl,Eif2ak3,Enpp1,Esr1,Farp2,Fblim1,Fbn1,Fcgr4,Fgfr2,Fosl2,Frzb,Gab2,Galc,Gja1,Gnptab,Gpr65,Gsk3b,Gsn,Hivep3,Ibsp,Ifngr1,Igf1r,Il1r1,Il6st,Inpp5d,Irak3,Irs1,Itgb3,Jak1,Khdrbs1,Kitl,Limd1,Lrrk1,Ltbp3,Mgp,Mitf,Mmp14,Nbr1,Ncoa1,Nos2,Nos3,Notch2,Nov,Npr3,Npy1r,Nr3c1…
MP:0008989	abnormal liver sinusoid morphology	5.72e-07	2.34e-05	59	4421	Common	4933434E20Rik,Acvrl1,Adcy9,Ahr,Atp11a,Brd2,Capza2,Ccr1,Ccr5,Coro1c,Cp,Csf1,Ctbs,Dbn1,Egln1,Fmnl1,Fut8,Glmp,H13,Hgf,Hgsnat,Hspg2,Jak1,Jarid2,Kif1bp,Lipa,Man2b1,Manba,Map2k4,Med1,Met,Mpv17,Mtf1,Naglu,Neu1,Nxn,Prkag1,Prrc2b,Pten,Ptpn11,Raf1,Rb1,Rfx5,Rpgrip1l,Rundc1,Setd5,Sh3pxd2a,Slc20a1,Smg9,Srsf3,Ssr2,Tcf7l2,Tet2,Trim37,Uaca,Ubr4,Xpnpep1,Zdhhc13,Zmynd11
MP:0012762	abnormal alpha-beta T cell morphology	5.79e-07	2.36e-05	376	4421	Common	4933434E20Rik,Abcb1a,Acp2,Acsl3,Adam10,Adpgk,Aff1,Akap9,Aldh2,Anpep,Ap1g1,Ap4e1,Apc,Arap2,Arhgef1,Arhgef6,Arid1b,Arid5a,Arid5b,Aspm,Atg3,Atg5,Atm,Atp11a,Atp13a2,Atp5f1,B2m,Bap1,Bcl10,Bcl2l1,Bcl3,Bcl6,Bclaf1,Becn1,Bhlhe40,Blnk,Bmi1,Bnip2,Btk,C3ar1,Cadm1,Casc4,Casp8,Cbx4,Ccdc127,Ccl2,Ccnd3,Ccr1,Ccr5,Cd1d1,Cd22,Cd274,Cd44,Cd48,Cd59a,Cd74,Cd83,Cd84,Cd86,Cdk6,Cdkal1,Cdkn1a,Cflar,Chd2,Chd4,Chd9,Ciita,C…
MP:0005312	pericardial effusion	5.82e-07	2.36e-05	81	4421	Common	Acvrl1,Adm,Akap13,Arid1a,Bmp4,Bmpr1a,Braf,Casp8,Ccm2,Commd9,Cpt2,Cyp51,Daam1,Ddx3x,Dll4,Dnaja3,Ece1,Eng,Ep300,Erg,F2r,Fbn1,Flt4,Foxo1,Gab1,Glrx3,Hand2,Hdac7,Heg1,Hif1a,Hprt,Hsd17b7,Hspg2,Ikbkap,Itgb1,Itgb8,Jup,Kcnh2,Kif3a,Kmt2b,Lats2,Med1,Mgrn1,Mib1,Myh10,Myocd,Naca,Ncoa6,Nf1,Nfatc1,Notch2,Nr2f2,Nsdhl,Parva,Pkd2,Prmt7,Ptpn11,Qk,Ramp2,Rbpj,Rheb,Rttn,Runx1,Senp2,Setd2,Sos1,Srf,Ssr2,Tdg,Tfpi,Tfrc,Tg…
MP:0005367	renal/urinary system phenotype	5.95e-07	2.4e-05	609	4421	Common	2610301B20Rik,4933434E20Rik,AB124611,Abca1,Abca3,Abcc4,Abcg2,Acad8,Acadl,Acads,Acbd3,Ace,Acp2,Acvrl1,Adamts1,Adcy3,Adcy6,Adipoq,Adm,Aga,Agtrap,Ahi1,Ahr,Akap11,Akr1a1,Akr1b3,Aldh1a3,Aldh2,Aldoc,Alms1,Ampd2,Ank3,Ankrd26,Anxa4,Ap3b1,Ap4e1,Apc,Aqp1,Arhgap1,Arhgap35,Arhgap42,Arid1b,Arid5b,Arl13b,Arl3,Asah1,Ash1l,Asl,Atad2b,Ate1,Atg5,Atmin,Atp2a2,Atp2b1,Atp6ap2,Atp6v0d1,Atp7a,Atr,Axin1,Bag6,Bax,Bbs2,Bb…
MP:0000706	small thymus	6.86e-07	2.75e-05	185	4421	Common	Adam10,Adamts6,Aff1,Ap2b1,Apc,Apex2,Araf,Arhgap1,Arhgap5,Arid5b,Atg3,Atm,Atmin,Atr,Bad,Bag3,Bcl6,Bmi1,Braf,Brd2,Cacybp,Carm1,Cbl,Cbx4,Ccnd3,Cd2ap,Cdk6,Chd4,Chd7,Col4a2,Crebbp,Csf1,Ctc1,Ctcf,Ctsd,Ctsl,Cul4a,Cux1,Dad1,Dck,Dhrs7b,Dhx36,Dll4,Dnajc11,Dnase2a,Dock1,E2f4,Ednra,Elavl1,Ep300,Esr1,Ets1,Fads2,Fas,Fbln1,Fbxw7,Fubp1,Gabpa,Hax1,Hectd3,Hnrnpl,Hr,Htra2,Ikzf1,Il6st,Il7r,Inpp5d,Jak1,Jarid2,Jmjd6,K…
MP:0000787	abnormal telencephalon morphology	6.88e-07	2.75e-05	407	4421	Common	4933434E20Rik,Abcb1a,Adcy3,Adgra2,Adgrg1,Aga,Agtpbp1,Aifm1,Akt3,Aldh2,Ambra1,Ank2,Ank3,Ap3b1,Ap3m2,Ap4e1,Apaf1,Aph1a,App,Arfgef1,Arfgef2,Arhgap35,Arhgap5,Arid1b,Arpc3,Asns,Aspa,Aspm,Atg5,Atg7,Atp11a,Atp1a2,Atp1b2,Atp7a,Atr,Atrn,Atrx,Atxn1l,B4galt2,Bad,Bag6,Basp1,Bbs2,Bbs4,Bbs7,Bdnf,Bicd2,Bid,Bmi1,Braf,Brpf1,Btg1,C1qa,C3,Cacna1c,Cadm1,Cadps,Canx,Casp3,Casp9,Cav1,Ccdc88a,Cd81,Cdc42,Cdh2,Cdk5,Cdk5ra…
MP:0008943	increased sensitivity to induced cell death	7.07e-07	2.81e-05	99	4421	Common	Abcc9,Adar,Aifm1,Aldh2,Apbb1,Apex2,Appl1,Atf6,Atf6b,Atm,Atmin,Atr,Bad,Bcl2l1,Brca2,Casp3,Ccng1,Ccs,Cdkn1a,Chd2,Ciz1,Cops6,Cp,Crebbp,Cul4a,Ddx5,Elavl1,Ercc1,Ercc3,Fth1,Gclm,Glrx,Gpx1,Gpx7,Hif1a,Hmgn1,Hspa1a,Ikbkb,Ing1,Ino80,Ivns1abp,Kat8,Mapkap1,Mcm9,Mcph1,Mdc1,Mre11a,Mta1,Mtf1,Mtfr1,Nabp2,Nbn,Nfe2l2,Ninj1,Nus1,Pafah2,Parp14,Parp2,Paxip1,Phb2,Pink1,Pnp,Polb,Polk,Prdx1,Prkdc,Ptgs1,Rad50,Raf1,Rasa1,…
MP:0011108	embryonic lethality during organogenesis, incomplete penetrance	7.1e-07	2.81e-05	153	4421	Common	Acvr2a,Aff4,Ambra1,Atrx,Bbs4,Becn1,Bmp4,Braf,Brca2,Brd1,Brpf1,C1galt1c1,Capns1,Casp8,Cdh5,Chd7,Ciapin1,Commd1,Crebbp,Ctnnb1,Cyr61,Dag1,Ddx58,Dicer1,Dll4,Dnaja3,Dnm1l,Dyrk1a,Dzip1,E2f3,Ece1,Egfr,Elavl1,Ep300,Epas1,Ercc1,Etv6,F2r,F3,F5,Fbn1,Fbxw8,Fgfr1,Flnb,Flrt2,Flt1,Fn1,Ftl1,G6pdx,Gab1,Gli3,Glrx3,Gna13,Gne,Hccs,Hdac2,Heg1,Hif1a,Hmgcl,Hmgn1,Hprt,Hspg2,Huwe1,Ift88,Impa1,Itga4,Itga7,Itgav,Itgb1,Itgb…
MP:0000952	abnormal CNS glial cell morphology	7.24e-07	2.85e-05	169	4421	Common	Abcd1,Abhd12,Acp2,Adgrg1,Aga,Aldh2,Als2,App,Arsa,Aspa,Aspm,Atg7,Atmin,Atp13a2,Atr,Atrn,B4gat1,Bmp4,Braf,Brpf1,Cadm1,Canx,Cav1,Ccm2,Cd200,Cd81,Cdh2,Cdkn1b,Clcn3,Cln6,Col4a1,Coq9,Cp,Csf1,Csf1r,Ctsd,Cx3cr1,Dag1,Depdc5,Dmd,Dner,Ei24,Eif2b4,Eif2b5,Eml1,Erbb2,Ezh2,Fgfr1,Fgfr2,Fig4,Fkrp,Foxp2,Galc,Gba,Gja1,Gli3,Gls,Gnptab,Gns,Grn,Hax1,Hexb,Hfe,Hgsnat,Hsd17b4,Hsf1,Hspg2,Htra2,Htt,Igf1r,Il4ra,Il6st,Ireb2,…
MP:0002398	abnormal bone marrow cell morphology/development	7.4e-07	2.9e-05	294	4421	Common	4933434E20Rik,Abcb1a,Abcc10,Abcg2,Acbd5,Actl6a,Adam17,Adar,Ago2,Ano6,Arhgap1,Arhgap22,Arhgef5,Arid4a,Arid5b,Asah1,Atg7,Atp11a,Atr,B4galt1,B4gat1,Bcl2l1,Bcl6,Bmi1,Bnip3l,Braf,Brca2,Brd1,Btk,C3ar1,Casp8,Cbl,Ccnd3,Cd34,Cd47,Cdh5,Cdk6,Cdkn1a,Cdkn2c,Cebpb,Cflar,Chd2,Chordc1,Clpp,Cpox,Creb3l1,Crebbp,Csf1,Csf1r,Csf2rb2,Csnk1a1,Csnk1g3,Ctc1,Ctnnb1,Cul4a,Cxcl12,Cxcr4,Dck,Ddrgk1,Dhx33,Dhx36,Diaph1,Dicer1,D…
MP:0014012	abnormal cranial blood vasculature morphology	7.91e-07	3.09e-05	64	4421	Common	4933434E20Rik,Acvrl1,Adam17,Adcy9,Adgra2,Aggf1,Arap3,Atg16l1,Cav1,Ccdc134,Ccm2,Cmip,Col4a2,Commd9,Crim1,Dhx35,Eng,Fbxw7,Flnb,Fzd4,H13,Hif1a,Itgav,Itgb8,Kidins220,Kif1bp,Krit1,Llgl1,Mkl2,Morc2a,Myh9,Ndufs4,Notch4,Nrp1,Nsun2,Otulin,Pdcd10,Pdgfb,Pdgfrb,Pdzrn3,Pik3ca,Prmt7,Pros1,Prrc2b,Psen1,Pten,Pth1r,Rala,Rapgef1,Reck,Rpgrip1l,Setd5,Sh3pxd2a,Slc25a20,Smg9,Syk,Tcf7l2,Tnfrsf21,Trappc9,Unk,Vegfa,Wasl,…
MP:0000452	abnormal mouth morphology	7.99e-07	3.11e-05	267	4421	Common	4930453N24Rik,Acan,Acvr1,Acvr1b,Acvr2a,Adamts2,Adamts6,Adgra2,Akap9,Alkbh1,Ank,Antxr1,Ap2b1,Apaf1,Apc,Arhgap29,Arid5b,Bbx,Bdnf,Bmp4,Bmpr1a,Bnc2,Braf,Cask,Casp3,Cc2d2a,Ccl2,Cdc42,Cdkn1b,Cdon,Chd7,Chrd,Chuk,Ckap5,Cnnm4,Cplane1,Cramp1l,Creb3l2,Crebbp,Crk,Csf1,Csf1r,Csrnp1,Ctgf,Ctnnb1,Ctsk,Ctsl,Cyp51,Dcn,Dctn5,Ddx10,Dhrs3,Disp1,Dlg1,Dnm2,Dst,Dync2h1,Ece1,Edn1,Ednra,Ednrb,Efnb1,Efnb2,Egfr,Ermp1,Ext1,E…
MP:0000689	abnormal spleen morphology	8.14e-07	3.15e-05	474	4421	Common	Abca1,Abcc10,Abcc4,Ackr3,Aco1,Adam10,Adam17,Adh5,Adpgk,Ago2,Ahr,Aif1,Akap12,Akap13,Ap1b1,Ap4e1,Apc,Arhgap1,Arhgef1,Arid4a,Arid5b,Asah1,Asb1,Ascc2,Asl,Atg3,Atl2,Atm,Atmin,Atr,B3gnt5,B4galt1,Bag3,Bap1,Bax,Bcl10,Bcl3,Bcl6,Becn1,Bhlhe40,Birc3,Blnk,Bmi1,Bnip3l,Bok,Braf,Brca2,Bscl2,Btk,C3,C4b,C5ar1,C9orf72,Cacybp,Casp8,Cbl,Cd200,Cd22,Cd2ap,Cd34,Cd37,Cd47,Cd72,Cd84,Cd86,Cdc73,Cdk6,Cdkl2,Cdkn1a,Cdkn1b,Cd…
MP:0009703	decreased birth body size	8.26e-07	3.18e-05	130	4421	Common	Abhd5,Aifm1,Alkbh1,Apex2,Arhgef28,Arid1b,Atg3,Atp2b1,Atrx,Azin1,Baz1b,Bbs2,Bbs4,Bbs7,Bnc2,Braf,Brca2,Casp9,Cdc42,Cdk7,Cdo1,Chd2,Chuk,Clic4,Cnot3,Copb2,Cplane1,Cyld,Dact1,Dgat2,Dgkd,Dhrs3,Dmtf1,Dnajb9,Dnajc6,Dnm2,Dock1,Dse,Dusp16,Dym,Ehmt1,Eif4e2,Elovl1,Epas1,Ercc1,Errfi1,Esr1,Fat4,Fgfr2,Fgfrl1,Fkrp,Gba,Gga2,Gga3,Ghr,Gja1,Glg1,Hat1,Hdac2,Hipk2,Hnrnpd,Hp1bp3,Ift80,Igf1,Igf1r,Igfbp4,Ikbkap,Ilf3,Irs1…
MP:0004938	dilated vasculature	8.59e-07	3.28e-05	34	4421	Common	Acvrl1,Antxr2,Ccm2,Col4a1,Commd9,Crim1,Egln1,Fbln1,Fli1,G6pdx,Gja1,Itga3,Itgb1,Krit1,Lama4,Mlst8,Ncoa6,Parva,Pdcd10,Pdgfb,Pdlim7,Pnpla6,Prkci,Prrc2b,Ptk2,Reck,Runx1,Supv3l1,Syk,Tcf7l1,Tie1,Tsc2,Vcl,Vegfa
MP:0009866	abnormal aorta wall morphology	8.59e-07	3.28e-05	34	4421	Common	Acadm,Acta2,Arhgef1,Atp7a,Col3a1,Cul3,Ddr1,Des,Emilin1,Fbln5,Fbn1,Fkbp10,Klf15,Lmna,Lox,Lrp1,Mgp,Mkl2,Pdgfb,Pdgfrb,Pepd,Plod1,Poldip2,Ptgis,Ramp2,S1pr1,Slc2a10,Tab1,Tgfb2,Tgfbr1,Tgfbr2,Timp3,Tmbim1,Vav3
MP:0002166	altered tumor susceptibility	8.74e-07	3.32e-05	339	4421	Common	Acadvl,Acox1,Acvr1,Adam15,Aggf1,Ahr,Aldh2,Amfr,Anxa7,Apc,Arid4a,Arl6ip5,Atad5,Atf2,Atg4c,Atm,Atp2a2,Atp2c1,Atr,Bad,Bap1,Becn1,Bin1,Blnk,Bmpr1a,Braf,Brca2,Bub3,Camk2g,Cat,Cav1,Cbx7,Ccdc80,Ccl2,Ccndbp1,Ccng1,Cd34,Cd47,Cdc37,Cdc73,Cdk11b,Cdk5rap2,Cdkn1a,Cdkn1b,Cdkn2c,Cebpb,Cers2,Chd2,Chfr,Chordc1,Chuk,Ciz1,Cmip,Col4a2,Cop1,Cops6,Coro1c,Crebbp,Ctnnb1,Cul4a,Cul9,Cygb,Cyld,Cyp1b1,Cytip,Dclre1a,Ddx58,De…
MP:0003743	abnormal facial morphology	1.07e-06	4.05e-05	347	4421	Common	4930453N24Rik,Acan,Acvr1,Acvr1b,Acvr2a,Adamts2,Adamts6,Adgra2,Akap9,Akr1a1,Aldh1a3,Alkbh1,Ank,Antxr1,Ap2b1,Apaf1,Apc,App,Arhgap29,Arid1a,Arid5b,Atp11a,Atr,Baz1b,Bbs4,Bbx,Bdnf,Bmp4,Bmpr1a,Bnc2,Braf,Brd2,Cask,Casp3,Casp9,Cc2d2a,Ccl2,Cdc42,Cdkn1b,Cdo1,Cdon,Cep290,Chd7,Chrd,Chuk,Ckap5,Cnnm4,Col27a1,Col4a3bp,Cplane1,Cramp1l,Creb3l2,Crebbp,Crk,Csf1,Csf1r,Csrnp1,Ctgf,Ctnna1,Ctnnb1,Ctsa,Ctsk,Ctsl,Cyp51,D…
MP:0009701	abnormal birth body size	1.13e-06	4.24e-05	132	4421	Common	Abhd5,Aifm1,Alkbh1,Apex2,Arhgef28,Arid1b,Atg3,Atp2b1,Atrx,Azin1,Baz1b,Bbs2,Bbs4,Bbs7,Bnc2,Braf,Brca2,Casp9,Cdc42,Cdk7,Cdo1,Chd2,Chuk,Clic4,Cnot3,Copb2,Cplane1,Cyld,Dact1,Dgat2,Dgkd,Dhrs3,Dmtf1,Dnajb9,Dnajc6,Dnm2,Dock1,Dse,Dusp16,Dym,Ehmt1,Eif4e2,Elovl1,Epas1,Ercc1,Errfi1,Esr1,Fat4,Fgfr2,Fgfrl1,Fkrp,Gba,Gga2,Gga3,Ghr,Gja1,Glg1,Grb10,Hat1,Hdac2,Hipk2,Hnrnpd,Hp1bp3,Ift80,Igf1,Igf1r,Igf2r,Igfbp4,Ikbk…
MP:0011110	preweaning lethality, incomplete penetrance	1.19e-06	4.47e-05	245	4421	Common	Abi3bp,Acsl4,Acvr2a,Adamts9,Adcy9,Aff1,Agap1,Agl,Agpat1,Agps,Ahnak,Akap10,Apbb2,App,Arhgef1,Arhgef15,Arl8b,Armc5,Arpc5l,Aspa,Atf6b,Atg4b,Atp2b1,Atp5g2,Atp7a,Atp8b2,Bach1,Baiap2,Bbs4,Bbs7,Bmi1,Bscl2,Cant1,Cap2,Capn7,Casc3,Cavin1,Cbl,Cbx5,Ccdc134,Cdan1,Cdc34,Cdh5,Cdk2,Cdk4,Chd2,Chd7,Chn1,Ckap4,Clec16a,Clmp,Clpp,Cnot6,Cntn1,Col4a3bp,Copb2,Cpsf3,Cpt2,Crebbp,Crtc3,Ctdsp2,Ctdspl2,Ctnnb1,Ctsd,Cttn,Cwc27…
MP:0000521	abnormal kidney cortex morphology	1.22e-06	4.55e-05	187	4421	Common	Abca1,Ace,Adamts1,Adipoq,Adm,Aga,Ampd2,Arhgap35,Arid5b,Arl13b,Ash1l,Asl,Atp6ap2,Atp7a,Atr,Bag6,Bcam,Bcr,Bhlhe40,Bicc1,Bmp4,Bmper,C1qa,C3,C4b,Ccni,Ccr1,Cd1d1,Cd2ap,Cd55,Cd72,Cdc42,Cdkn1a,Cdkn2c,Cebpb,Cep290,Cfh,Cfl1,Chd2,Clu,Col4a1,Coro1a,Coro2b,Crim1,Ctdnep1,Ctnnd1,Dcn,Ddr1,Dicer1,Dkc1,Dlg1,Egln1,Ep300,Esr1,Fam20c,Fas,Fat1,Fbln1,Fcgr2b,Fgfr2,Fgfrl1,Flcn,Fryl,Gadd45a,Glb1,Glis2,Gne,Golm1,Gpx7,Grk6…
MP:0000841	abnormal hindbrain morphology	1.23e-06	4.58e-05	269	4421	Common	4933434E20Rik,Aars,Acp2,Adam10,Adgrg1,Aff1,Aga,Agtpbp1,Ahi1,Aifm1,Akap12,Akt3,Als2,Ank3,Apaf1,Arcn1,Arfgef1,Arhgef2,Arsa,Atf2,Atg4b,Atg5,Atg7,Atm,Atp1b2,Atp7a,Atr,Atrn,Atxn1,Atxn7,B4galt2,Bax,Bcl2l1,Bcl2l2,Bdnf,Bicd2,Bmi1,Braf,Cadps,Canx,Casp2,Casp3,Ccm2,Ccnd2,Cdk5,Cdkn2c,Cep290,Cers2,Chp1,Clcc1,Cln3,Cntn1,Col4a2,Cp,Cplane1,Cstb,Ctnnb1,Cxcl12,Cxcr4,Cyfip2,Dab2ip,Dag1,Ddb1,Dner,Dnm1l,Dst,Dyrk1a,Eb…
MP:0000849	abnormal cerebellum morphology	1.25e-06	4.63e-05	223	4421	Common	Aars,Acp2,Adgrg1,Aff1,Aga,Agtpbp1,Ahi1,Aifm1,Akap12,Akt3,Als2,Ank3,Arcn1,Arfgef1,Arhgef2,Arsa,Atf2,Atg4b,Atg5,Atg7,Atm,Atp1b2,Atp7a,Atr,Atrn,Atxn1,Atxn7,B4galt2,Bcl2l2,Bdnf,Bicd2,Bmi1,Braf,Cadps,Canx,Casp3,Ccm2,Ccnd2,Cdk5,Cdkn2c,Cep290,Cers2,Chp1,Clcc1,Cln3,Cntn1,Cp,Cplane1,Cstb,Ctnnb1,Cxcl12,Cxcr4,Dab2ip,Dag1,Ddb1,Dner,Dnm1l,Ebf2,Egfr,Ei24,Eif2b4,Eif2b5,Eif4h,Eno2,Ext1,Fbxw7,Fgfr1,Fkrp,Fmr1,Foxp…
MP:0003717	pallor	1.25e-06	4.61e-05	121	4421	Common	Abcb10,Adar,Ago2,Arap3,Ate1,Atp7a,Birc6,Bmpr1a,Brd1,Cdh5,Chd2,Ckap4,Col5a2,Cox4i1,Crebbp,Crkl,Cul4b,Dbt,Ddrgk1,Dhx36,E2f4,Eloa,Ern1,F3,F5,Fbxw7,Fst,Fubp1,Gba,Ggnbp2,Gna13,Gskip,Gtf2ird1,Hk1,Hspa5,Icmt,Ikbkap,Ikzf1,Itgb1,Jak2,Jmjd6,Jup,Kat6a,Kitl,Klf6,Krit1,Lama4,Lig1,Lmo2,Lmo4,Lpl,Lrp1,Map2k4,Mapk14,Mapk7,Mcm3,Mdm4,Meis1,Myh11,Myo18a,Ncoa6,Ncor1,Nf1,Nfatc1,Nfe2l1,Npm1,Nprl3,Nsdhl,P4ha1,Pak4,Paxip…
MP:0004787	abnormal dorsal aorta morphology	1.27e-06	4.66e-05	61	4421	Common	Acvrl1,Brd2,Ccm2,Cdh5,Col4a3bp,Commd9,Cyr61,Dll4,Ece1,Ednra,Eng,Flt1,Flt4,Fn1,Foxo1,Hdac7,Hif1a,Ikbkap,Itga5,Kat7,Kctd10,Kdr,Krit1,Lemd3,Lmo2,Map3k7,Mapk7,Med24,Mef2c,Metap2,Mib1,Myocd,Nrp1,Pdcd10,Pik3ca,Pnpla6,Poglut1,Prrc2b,Ptk2,Ptprj,Pxn,Rasa1,Rbpj,Rdh10,Rpgrip1l,Runx1,Setd5,Sh3pxd2a,Smad2,Smad5,Smg9,Tdg,Tgfb2,Tgfbr2,Tmem100,Traf6,Vegfa,Wasf2,Wnk1,Zfp36l1,Zmiz1
MP:0000609	abnormal liver physiology	1.29e-06	4.73e-05	216	4421	Common	Abca5,Abcb10,Abcg2,Abhd5,Acaca,Acox1,Adamts7,Adar,Ahr,Akap12,Aldh2,Amfr,Apc,Arih2,Atg7,Atp8b1,Bbs4,Bcl6,C3,C3ar1,C4b,Casp8,Cav1,Ccar2,Ccdc134,Ccndbp1,Ccng1,Ccr5,Cd36,Cd44,Cdk2,Cdkn1a,Cebpb,Cenpe,Ces1d,Chd2,Clcn3,Clock,Cluh,Cox6a1,Crem,Crtc2,Csnk1a1,Ctsl,Cul4a,Cygb,Dbi,Degs1,Dicer1,Drosha,Efs,Egfr,Egr1,Eif6,Elovl5,Ercc1,Ern1,Fah,Fan1,Fas,Fbxl5,Fcgr2b,Fech,Fn1,Fth1,Gak,Gba,Gclc,Glmp,Golm1,Gpam,Grn,…
MP:0000875	abnormal cerebellar Purkinje cell layer	1.31e-06	4.75e-05	133	4421	Common	Aars,Acp2,Aff1,Aga,Agtpbp1,Aifm1,Akap12,Als2,Ank3,Arcn1,Arsa,Atf2,Atg5,Atg7,Atm,Atp7a,Atr,Atxn1,Atxn7,B4galt2,Bcl2l2,Bicd2,Bmi1,Braf,Ccnd2,Chp1,Cln3,Cntn1,Cp,Cxcr4,Dab2ip,Dner,Dnm1l,Ebf2,Egfr,Ei24,Eif2b5,Fbxw7,Fmr1,Foxp2,Fzd4,Gas1,Gba,Gja1,Glb1,Gli3,Glrb,Gm2a,Gnpat,Gnptab,Herc1,Hexb,Hgsnat,Hsd17b4,Inpp4a,Ireb2,Itpr1,Ldb1,Lpin2,Lrp8,Lyst,Map1a,Map1b,Map2,Map2k4,Mfn2,Mthfr,Myh10,Myo5a,Naglu,Nbn,Nco…
MP:0002884	abnormal pharyngeal arch morphology	1.31e-06	4.75e-05	89	4421	Common	Acvr1,Acvrl1,Adam10,Akap13,Aph1a,Arid1a,Baz1b,Bmp4,Ccm2,Cdh5,Chd7,Chrd,Cpox,Ctnnb1,Dicer1,Disp1,Dlc1,Ece1,Edn1,Ednra,Efnb2,Eng,Fgfr1,Foxo1,Gli3,Grb2,Gtf2i,Gtf2ird1,Hand2,Hdac7,Hif1a,Hoxa3,Hprt,Hsd17b7,Ift88,Ikbkap,Itgav,Itgb1,Kat6a,Kat7,Kcnh2,Kdr,Kif3a,Krit1,Lats2,Lemd2,Ltbp1,Mafb,Map3k7,Mapk7,Mau2,Med12,Mef2c,Mib1,Mkl2,Mthfd1l,Ncstn,Nipbl,Nrp1,Opa1,Otulin,Pbx1,Pcsk6,Pkn2,Plxnd1,Por,Prrc2b,Rasa1,…
MP:0004056	abnormal myocardium compact layer morphology	1.35e-06	4.84e-05	47	4421	Common	Arid2,Atp11a,Atp2a2,Bmpr2,Braf,Brd2,Calcrl,Crebbp,Daam1,Egln1,Ep300,Evl,Ezh2,Flrt2,Foxp1,Gja1,Hdac2,Hexim1,Hspg2,Jarid2,Jmjd6,Kmt2d,Map3k7,Mapk7,Med1,Myh10,Nae1,Ncoa6,Nf1,Nfat5,Nipbl,Nprl3,Pparg,Ptpn11,Qrich1,Rb1cc1,Rbp4,Smad4,Sptan1,Sptbn1,Ssr2,Tbx18,Traf6,Vcam1,Vegfa,Ywhae,Zfpm2
MP:0010760	abnormal macrophage chemotaxis	1.35e-06	4.84e-05	47	4421	Common	Angptl2,B4galt1,Ccl2,Ccr5,Cd163,Cd36,Cdkn1a,Chuk,Cmklr1,Csf1,Cx3cr1,Elavl1,Flt1,Fmnl1,Glb1,Hif1a,Ikbkb,Il33,Il4ra,Inpp5d,Itga4,Itgb3,Jmjd6,Lgals3,Litaf,Mcoln2,Mmp28,Myo9b,Ndrg2,Ninj1,Pik3cg,Plau,Plec,Pon2,Pten,Ptk2b,Ptn,Rgs4,Rock1,Rpl13a,S100a4,Selp,Spp1,Tax1bp1,Tlr4,Traf3ip2,Trpv2
MP:0004076	abnormal vitelline vascular remodeling	1.4e-06	5.01e-05	49	4421	Common	Acvrl1,Aph1a,Arap3,Atp7a,Cacnb2,Casp8,Ccm2,Chm,Dicer1,Dll4,Efnb2,Ephb4,Fbxw7,Flt4,Fn1,Foxo1,Hif1a,Jag1,Kat7,Kctd10,Map3k3,Map3k7,Mapk14,Mapk7,Mib1,Nr2f2,Nsdhl,Pak4,Pdcd10,Pik3ca,Plpp3,Poglut1,Ptk2,Ptpn11,Ptprb,Ptprj,Rbpj,Reck,Runx1,Smad5,Tek,Tgfbr1,Tjp1,Tmem100,Ubr4,Ubr5,Wasf2,Wnk1,Zmiz1
MP:0005563	abnormal hemoglobin content	1.41e-06	5.02e-05	152	4421	Common	Abcb10,Aco1,Actl6a,Adam10,Adam17,Add1,Adgrf5,Ago2,Aldh3a2,Ap4e1,Arnt,Asah1,Asns,Atl2,Atp6v1b2,B4galt1,Bag1,C9orf72,Cd47,Chd2,Chn1,Chordc1,Ciapin1,Cln6,Col4a1,Col4a2,Cops4,Cp,Crlf3,Ddrgk1,Dhx36,Dkc1,Dkk3,Dock10,Dpy19l3,Dusp3,Egln1,Eif2b3,Epas1,Epb41,Exoc6,Fbxo7,Fech,Fgfrl1,Fkbp10,G6pdx,Gapdh,Gba,Golga3,Gpr183,Hk1,Hmox1,Hprt,Hyal2,Idh1,Ikzf1,Il10rb,Insr,Ireb2,Irf8,Itgb3,Jak1,Jak2,Jmjd6,Jup,Kat14,Kd…
MP:0010500	myocardium hypoplasia	1.41e-06	5.02e-05	55	4421	Common	Adgrg6,Akap13,Ate1,Atp2a2,Btaf1,Cenpf,Daam1,Dll4,Dnaja3,Ep300,Fbln1,Flrt2,Foxp1,Gja1,Gys1,Itgav,Jarid2,Jmjd6,Jup,Kdm6a,Kif3a,Lats2,Lemd2,Map3k3,Mapk7,Med1,Med24,Mef2c,Megf8,Myh10,Nae1,Ncoa6,Nprl3,Ntf3,Pdcd10,Pdlim3,Pparg,Rbp4,Rbpj,Shc1,Smad4,Sptbn1,Srf,Tbx18,Tdg,Tead1,Tgfb2,Tgfbr3,Ubp1,Vegfa,Wasf2,Wnk1,Ywhae,Zfp36l1,Zfpm2
MP:0003105	abnormal heart atrium morphology	1.5e-06	5.31e-05	140	4421	Common	4933434E20Rik,Ace,Ackr3,Acvr1,Adam19,Akap6,Anks6,Ate1,Atg16l1,Atp11a,Atp2a2,Baz1b,Bmp4,Brd2,Cap2,Cc2d2a,Ccm2,Cdh2,Cenpf,Cep290,Chd2,Cntrl,Cog6,Col4a2,Col4a3bp,Coro1c,Cox15,Cplane1,Crebbp,Crkl,Ctsl,Cyfip2,Cyp51,Cyr61,Dchs1,Dhrs3,Dlc1,Dll4,Dmd,Dync2h1,Egln1,Ep300,Epha3,Erbb2,Fat4,Fbln1,Fbn1,Fgfr1,Fgfr2,Fig4,Flna,Gja1,Gja5,Gnaq,Gys1,H13,Hccs,Hdac7,Heg1,Hexim1,Hsd17b7,Ift172,Ift74,Ift88,Invs,Itgb1,Ja…
MP:0002972	abnormal cardiac muscle contractility	1.61e-06	5.66e-05	176	4421	Common	Aars,Abcb8,Abcc9,Abhd5,Acadvl,Adam17,Adcy6,Adipoq,Adm,Aifm1,Akap12,Akap13,Anxa6,Ap4e1,Arrb1,Ate1,Atg5,Atp1a1,Atp1a2,Atp1b1,Atp2a2,Atp6ap2,Bag3,Bcar1,Bmpr1a,Bnip3l,Braf,Cacna1c,Cacna2d1,Camk2d,Cap2,Capn1,Capns1,Cast,Cav1,Cdc42,Cdh2,Clcn3,Clu,Cnot1,Cnot3,Col4a3bp,Crem,Cryab,Ctsl,Dag1,Ddr2,Des,Dicer1,Dmd,Dnaja3,Dnm1l,Dusp6,Ednrb,Efna1,Egfr,Egln1,Eif4ebp1,Emd,Ep300,Erbb2,Fstl1,Fxyd1,Gas2l3,Gja1,Glrx3…
MP:0004808	abnormal hematopoietic stem cell morphology	1.66e-06	5.83e-05	85	4421	Common	Actl6a,Adam10,Adar,Arhgap1,Arid1a,Arid4a,Atg7,Atr,Bap1,Bcr,Bmi1,Brd1,Cbl,Cdk6,Cdk7,Cdkn1a,Crebbp,Csf1,Csnk1a1,Ctc1,Cul4a,Cxcl12,Dhx36,Egr1,Elf4,Ep400,Ercc1,Erg,Etv6,Ezh1,Fbxw7,Flt1,Foxo3,Gata2,Hax1,Hif1a,Hip1,Id1,Idh1,Il6st,Jak2,Kat6a,Kdm1a,Kdm5a,Kmt2a,Kmt2e,Man2a1,Mbtd1,Mcm3,Meis1,Msi2,Ncor2,Ncstn,Npm1,Pbx1,Pcid2,Per2,Pfkm,Phc1,Picalm,Pml,Ppp2ca,Prkdc,Ptpn11,Rad50,Rapgef2,Rassf2,Rb1cc1,Rbm15,Rpl…
MP:0000877	abnormal Purkinje cell morphology	1.69e-06	5.92e-05	120	4421	Common	Aars,Acp2,Aff1,Aga,Agtpbp1,Aifm1,Als2,Ank3,Arcn1,Arsa,Atf2,Atg5,Atg7,Atm,Atp7a,Atr,Atxn1,Atxn7,B4galt2,Bcl2l2,Bicd2,Bmi1,Braf,Ccnd2,Chp1,Cntn1,Cp,Cxcr4,Dab2ip,Dnm1l,Ebf2,Egfr,Ei24,Fbxw7,Fmr1,Foxp2,Fzd4,Gas1,Gba,Glb1,Glrb,Gm2a,Gnpat,Gnptab,Herc1,Hexb,Hgsnat,Hsd17b4,Inpp4a,Ireb2,Itpr1,Ldb1,Lrp8,Lyst,Map1a,Map1b,Map2,Map2k4,Mfn2,Myh10,Myo5a,Naglu,Ncoa1,Ndufs4,Npc1,Npc2,Nr1d1,Nsdhl,Ntrk2,Numb,Pdha1,P…
MP:0008558	abnormal interferon-beta secretion	1.74e-06	6.05e-05	24	4421	Common	Arhgef2,Atg9a,Cd200r1,Dhx58,Hcfc2,Hmox1,Ifnar1,Ifnar2,Irak4,Irf1,Irf7,Khsrp,Map3k8,Mavs,Mex3c,Msr1,Nlrc5,Nlrx1,Peli1,Pycard,Tbk1,Tlr3,Tlr4,Tradd
MP:0002151	abnormal neural tube morphology	1.75e-06	6.06e-05	270	4421	Common	2700049A03Rik,Abi1,Acvr1,Adam10,Adar,Adgra2,Ago2,Alkbh1,Ambra1,Apaf1,Apc,Aph1a,Arhgap35,Arid1a,Arih2,Arl13b,Arnt,Atmin,Atp2c1,Axin1,Bbs4,Bcl10,Bmpr1a,Brca2,Brd1,Brd2,C2cd3,Casp8,Casp9,Cc2d2a,Cdc42,Cdh2,Cdon,Cfl1,Chd7,Chmp5,Cnbp,Commd9,Coq6,Cox4i1,Cpox,Crebbp,Crybg1,Csk,Ctbp2,Ctnnb1,Cyfip1,Dact1,Dchs1,Dctn1,Ddx3x,Dhx30,Dicer1,Disp1,Dlc1,Dnm1l,Dnmt1,Dph3,Dvl2,Dynll1,Dzip1,Efnb2,Egr1,Ehmt1,Ehmt2,Elo…
MP:0010428	abnormal heart right ventricle outflow tract morphology	1.89e-06	6.53e-05	42	4421	Common	4933434E20Rik,Ackr3,Adam17,Adam19,Arid1a,Braf,Brd2,Capza2,Cc2d2a,Cir1,Cplane1,Cxcr4,Dock1,Efnb2,Fgfrl1,Fuz,Gja1,H13,Hectd1,Hoxa3,Hprt,Hspg2,Jag1,Matr3,Megf8,Myh10,Nfatc1,Ntf3,Pdlim3,Phc1,Plce1,Prrc2b,Sh3pxd2a,Smad6,Smarca4,Ssr2,Tcf7l2,Tgfb2,Trappc9,Trip11,Wrn,Zfpm2
MP:0009873	abnormal aorta tunica media morphology	1.95e-06	6.71e-05	27	4421	Common	Acadm,Acta2,Atp7a,Col3a1,Des,Emilin1,Fbln5,Fbn1,Klf15,Lmna,Lox,Lrp1,Mgp,Mkl2,Pdgfb,Pdgfrb,Plod1,Poldip2,Ptgis,Ramp2,S1pr1,Slc2a10,Tab1,Tgfbr1,Tgfbr2,Tmbim1,Vav3
MP:0005375	adipose tissue phenotype	2.12e-06	7.27e-05	488	4421	Common	Abcg2,Acacb,Acad8,Acadvl,Ace,Acot13,Acot7,Acsf2,Adam12,Adamts1,Adcy3,Adgrf5,Adipoq,Adipor2,Adpgk,Aebp1,Afap1l2,Ahcyl1,Ahnak,Akap9,Alms1,Angptl2,Angptl4,Ank2,Ankrd26,Anxa1,Ap1s2,Ap4e1,Aplp2,Appl1,Arhgap1,Arhgap5,Arhgef11,Arid5b,Arl4a,Arpc2,Arrb1,Arrb2,Arrdc1,Arrdc3,Asah1,Ash1l,Aspa,Ate1,Atf3,Atg12,Atg5,Atl2,Atm,Atp6v0a1,Atp8b2,Atr,Atrn,B4galt1,Bag3,Baz1a,Bbs2,Bbs4,Bckdk,Bhlhe40,Braf,Brd2,Bscl2,Bzw…
MP:0002058	neonatal lethality	2.13e-06	7.27e-05	422	4421	Common	Abca3,Abcb7,Abhd5,Acan,Ackr3,Acvr1,Acvr2a,Adam17,Adgra2,Aff4,Ago2,Akap6,Aldh1a3,Ank2,Ano6,Ap3b1,Apc,Arfgef1,Arhgap1,Arid1a,Arid5b,Arnt,Atf2,Atg12,Atg16l1,Atg3,Atg5,Atg7,Atg9a,Atox1,Atp1a2,Atp2a2,Atxn1l,Azin1,B3gnt5,B4galt1,Bag6,Bin1,Birc6,Blmh,Bmper,Bmpr1a,Bnc2,Braf,Brca2,Cacna1c,Cadps,Cald1,Caprin1,Carm1,Cask,Cbl,Cbx4,Ccdc47,Cdc42,Cdh2,Cdon,Cebpb,Cebpg,Chd7,Chuk,Clip3,Cluh,Cnbp,Cnn3,Col27a1,Col5…
MP:0000691	enlarged spleen	2.15e-06	7.31e-05	245	4421	Common	Abca1,Adam10,Adam17,Ago2,Ahr,Arhgef1,Arid4a,Asah1,Ascc2,Atm,B3gnt5,B4galt1,Bap1,Bax,Bcl3,Bcl6,Bhlhe40,Blnk,Bnip3l,Bok,Braf,Bscl2,C4b,C9orf72,Casp8,Cbl,Cd47,Cd72,Cd86,Cdkn1a,Cdkn1b,Cdkn2c,Cebpb,Cflar,Chd2,Chordc1,Ciz1,Coro1a,Cpox,Crebbp,Csf1r,Ctsa,Cyld,Dbnl,Dck,Ddx58,Def6,Dhx36,Diaph1,Dicer1,Dido1,Dkc1,Drosha,Dusp6,Egln1,Egr1,Ep300,Epas1,Epb41,Erap1,Esyt2,Exoc6,Ezh2,Fads2,Fas,Fcgr2b,Fech,Fli1,Foxo…
MP:0003411	abnormal vein development	2.24e-06	7.57e-05	52	4421	Common	4933434E20Rik,Acvrl1,Adcy9,Adm,Atg16l1,Atp11a,Braf,Brd2,Ccm2,Cdh5,Cmip,Cog6,Col4a3bp,Coro1c,Crim1,Dll4,Efnb2,Ephb4,Flt4,Furin,Gli3,H13,Hdac7,Hspb7,Hspg2,Ikbkap,Kctd10,Mkl2,Morc2a,Nr2f2,Nxn,Pam,Pdcd10,Pik3ca,Polb,Prmt7,Prrc2b,Ptprb,Rala,Rbpj,Rpgrip1l,Setd5,Sh3pxd2a,Slc25a20,Tbx18,Tcf7l2,Traf6,Vegfa,Wasf2,Wnk1,Xpnpep1,Zmynd11
MP:0008540	abnormal cerebral hemisphere morphology	2.36e-06	7.96e-05	317	4421	Common	4933434E20Rik,Abcb1a,Adgrg1,Aga,Agtpbp1,Aifm1,Akt3,Aldh2,Ank2,Ank3,Ap3b1,Ap3m2,Ap4e1,Apaf1,App,Arfgef1,Arfgef2,Arhgap35,Arhgap5,Arid1b,Arpc3,Asns,Aspm,Atg5,Atg7,Atp7a,Atr,Atrn,Atrx,B4galt2,Bad,Basp1,Bbs2,Bbs4,Bbs7,Bdnf,Bicd2,Bid,Bmi1,Braf,Brpf1,Btg1,C1qa,C3,Cadm1,Cadps,Canx,Casp9,Cav1,Ccdc88a,Cd81,Cdc42,Cdh2,Cdk5,Cdk5rap2,Cdkn1b,Cdon,Cep290,Cep63,Cers2,Cfl1,Chd7,Chmp2b,Chn1,Ckap5,Ckb,Clcn3,Clip2,…
MP:0000774	decreased brain size	2.38e-06	7.99e-05	153	4421	Common	Ahi1,Aifm1,Akap13,Akt3,App,Arfgef1,Arhgef2,Arid1a,Arnt,Asns,Aspm,Atf2,Atr,Atxn1,Atxn7,Axin1,B4galt2,Bckdk,Bcl2l1,Bdnf,Braf,C330007P06Rik,Cav1,Ccdc88a,Cdk5rap2,Cep63,Clcn3,Cnbp,Copb2,Cplane1,Ctnnb1,Ctsf,Cyp27a1,Ddb1,Dnm1l,Dst,Dyrk1a,Egfr,Eif4e2,Eif4h,Fgfr2,Foxp2,Gba,Ghr,Gnb1,Gnpat,Gnptab,Hdac2,Hectd3,Hfe,Hsd17b7,Hspa5,Htra2,Htt,Huwe1,Igf1r,Itpr1,Itsn1,Kat6b,Kidins220,Kif1b,Kif1bp,Kif5c,Lama2,Lamc1…
MP:0000913	abnormal brain development	2.55e-06	8.53e-05	359	4421	Common	Abi1,Acp2,Adam10,Add1,Adgra2,Adgrg1,Ago2,Ahi1,Alkbh1,Ambra1,Apaf1,Apc,Aph1a,Arfgef2,Arhgap35,Arid1b,Arih2,Asah1,Aspm,Atmin,Atp11a,Atp2c1,Atr,Atxn1l,B4galt2,B4gat1,Bag6,Bcl10,Bcor,Bdnf,Becn1,Bicd2,Bmper,Braf,Brd2,Brpf1,Btaf1,C2cd3,C330007P06Rik,Casp3,Casp9,Cc2d2a,Ccdc88a,Ccnd2,Cdc42,Cdh2,Cdk5,Cdk5rap2,Cdon,Cep290,Cep63,Cfl1,Chd7,Chrd,Cnn3,Commd1,Coro1c,Cox4i1,Crebbp,Crkl,Crybg1,Csf1r,Ctbp2,Ctnna1,…
MP:0013663	increased myeloid cell number	2.56e-06	8.53e-05	144	4421	Common	Abcb10,Abraxas2,Actl6a,Adam10,Adam17,Add1,Agap1,Ago2,Anxa7,Ap4e1,Arid4a,Asah1,Atad5,Atp6v1d,Bak1,Bap1,Bnip3l,Casp8,Cbl,Cd47,Cd59a,Cflar,Chordc1,Clic1,Copg1,Cpox,Dcbld2,Dck,Dhx36,Dido1,E2f4,Eftud2,Egln1,Ep300,Epas1,Epb41,Etv6,Exoc6,Fam107b,Fbxo4,Fbxo7,Fech,Fli1,Foxo3,Glg1,Gpi1,Gpr183,Hk1,Hmga1,Hyal2,Id1,Ikzf1,Irf2bp2,Itgb2,Itgb3,Jak1,Jak2,Kitl,Klf3,Kmt2a,Knop1,Lama4,Ldha,Lgmn,Lig1,Lpin2,Lyn,Man2a1…
MP:0005325	abnormal renal glomerulus morphology	2.6e-06	8.63e-05	157	4421	Common	Abca1,Ace,Adm,Aga,Arid5b,Ash1l,Asl,Atp7a,Atr,Bag6,Bcam,Bcr,Bhlhe40,Bmp4,Bmper,C1qa,C3,C4b,Ccni,Ccr1,Cd1d1,Cd2ap,Cd72,Cdc42,Cdkn1a,Cdkn2c,Cebpb,Cfh,Chd2,Clu,Col4a1,Coro1a,Coro2b,Crim1,Ctdnep1,Ctnnd1,Dicer1,Dkc1,Dlg1,Egln1,Ep300,Esr1,Fas,Fat1,Fbln1,Fcgr2b,Fgfr2,Fgfrl1,Flcn,Gadd45a,Glb1,Glis2,Gne,Golm1,Gpx7,Grk6,Gusb,Hmox1,Hp,Hr,Ifih1,Ift172,Invs,Itga1,Itga3,Itgb1,Jak1,Kirrel,Lama5,Lamb2,Lamc1,Lbr,L…
MP:0000060	delayed bone ossification	2.68e-06	8.87e-05	82	4421	Common	Alkbh1,Bmpr1a,Bmpr2,Casp3,Chuk,Crebbp,Csf1r,Ctgf,Ctnna1,Ctnnb1,Dhrs3,Dicer1,Dusp6,Ehmt1,Elavl1,Fam20c,Fermt2,Fgfr2,Fgfrl1,Flnb,Fosl2,Foxn3,Fuz,Ghr,Gja1,Gsk3b,Gskip,Hspg2,Ibsp,Ick,Igf1,Igf1r,Itgb1bp1,Kat6b,Kdm6b,Lasp1,Lmnb1,Lnpk,Lrp6,Megf8,Mgat2,Mia3,Mmp14,Ndst1,Nfix,Nipbl,Nov,Npr3,P3h1,Pcsk5,Pds5a,Pds5b,Pex2,Pex7,Phf20,Pkdcc,Plk2,Prdm5,Prickle1,Prrx1,Serpinh1,Sfrp2,Sik3,Slc26a2,Smad1,Smad4,Sox9,S…
MP:0005416	abnormal circulating protein level	2.75e-06	9.02e-05	495	4421	Common	Abca6,Abcb7,Abhd5,Acaa1a,Acaca,Acad8,Ace,Acox1,Adam17,Adar,Adcy3,Adcy6,Adpgk,Afap1l2,Agl,Ahi1,Akap9,Aldh2,Amfr,Anapc13,Anapc4,Ank,Ano10,Ap4e1,Ap4m1,Apc,Aqp1,Arid5a,Arpc1b,Arpc4,Arrb2,Asah1,Ash1l,Asl,Atad2b,Atg16l1,Atg7,Atp6ap2,Atp6v1h,Atp7a,Atp8b1,Atp8b2,B2m,B4galt1,B4gat1,Bap1,Baz1b,Bcr,Bicd1,Boc,Bpnt1,Brd2,C3,C3ar1,C5ar1,Cacybp,Camk1,Casp4,Casp8,Cav1,Ccl2,Ccr1,Cd14,Cd163,Cd2ap,Cd44,Cd59a,Cd84,C…
MP:0004950	abnormal brain vasculature morphology	2.76e-06	9.02e-05	61	4421	Common	4933434E20Rik,Acvrl1,Adam17,Adcy9,Adgra2,Aggf1,Arap3,Atg16l1,Cav1,Ccdc134,Ccm2,Cmip,Crim1,Dhx35,Eng,Fbxw7,Flnb,Fzd4,H13,Hif1a,Itgav,Itgb8,Kidins220,Kif1bp,Krit1,Llgl1,Mkl2,Morc2a,Myh9,Ndufs4,Notch4,Nrp1,Nsun2,Otulin,Pdcd10,Pdgfb,Pdgfrb,Pdzrn3,Pik3ca,Prmt7,Pros1,Prrc2b,Psen1,Pten,Pth1r,Rala,Rapgef1,Reck,Rpgrip1l,Setd5,Sh3pxd2a,Slc25a20,Smg9,Syk,Tcf7l2,Tnfrsf21,Trappc9,Unk,Vegfa,Wasl,Wnk1
MP:0010224	abnormal heart ventricle outflow tract morphology	2.76e-06	9.02e-05	61	4421	Common	4933434E20Rik,Ackr3,Adam17,Adam19,Anks6,Arid1a,Braf,Brd2,Capza2,Cc2d2a,Cir1,Col4a2,Cplane1,Cxcr4,Cyfip2,Dctn5,Dock1,Efna1,Efnb2,Egfr,Fgfrl1,Fuz,Gja1,H13,Hectd1,Hoxa3,Hprt,Hspg2,Invs,Jag1,Klf3,Lrp1,Matr3,Megf8,Mgp,Myh10,Nfatc1,Nos3,Ntf3,Pdlim3,Phc1,Plce1,Prmt7,Prrc2b,Setd5,Sh3pxd2a,Smad4,Smad6,Smarca4,Sos1,Spp1,Spry2,Ssr2,Tab1,Tcf7l2,Tgfb2,Trappc9,Trip11,Wrn,Xpnpep1,Zfpm2
MP:0004720	abnormal platelet morphology	2.79e-06	9.09e-05	171	4421	Common	Abca1,Abraxas2,Acaa1a,Acsl4,Acsl5,Actl6a,Adam17,Add1,Ahcyl1,Aif1,Anxa7,Ap3b1,Arhgef3,Arid4a,Arrb1,Arrb2,Aspm,Atp5g2,Atp6v1d,Bak1,Bap1,Baz1a,Bcl2l1,Bloc1s5,Bloc1s6,Bnip3l,Cbl,Cd47,Cdc42,Cfh,Cflar,Chd2,Clic1,Clpp,Copg1,Crlf3,Cul4a,Cyp27a1,Dbn1,Dicer1,Dkc1,Dock7,Eftud2,Egln1,Egr1,Ehmt1,Entpd1,Ep300,Erg,Etv6,Fbxo7,Fli1,Foxo3,Fyb,Gpr107,Gpsm2,Hbs1l,Hps1,Hps3,Hps4,Hps5,Hyal2,Id1,Il6st,Inpp5d,Ireb2,Irf8…
MP:0011518	abnormal cell chemotaxis	2.93e-06	9.49e-05	75	4421	Common	Angptl2,B4galt1,Capg,Ccl2,Ccr5,Cd163,Cd36,Cd47,Cdkn1a,Chuk,Cmklr1,Csf1,Cx3cr1,Cxcr4,Dock2,Elavl1,Flot1,Flt1,Fmnl1,Fscn1,Git2,Glb1,Gsn,Hif1a,Ikbkb,Il1r1,Il33,Il4ra,Inpp5d,Itga4,Itgb3,Jagn1,Jam3,Jmjd6,Lgals3,Litaf,Mcoln2,Mmp28,Mpp1,Myo1f,Myo9b,Nckap1l,Ndrg2,Ninj1,Npr1,Pde4b,Pde4d,Pik3cg,Pik3r5,Plau,Plcg2,Plec,Pon2,Prex1,Pten,Ptk2b,Ptn,Rac1,Rac2,Rgs4,Rock1,Rpl13a,S100a4,Selp,Serpinb1a,Slc37a4,Spp1,S…
MP:0003186	abnormal redox activity	3e-06	9.71e-05	85	4421	Common	Abcb10,Abcc9,Abcg2,Abhd5,Adipoq,Adm,Aifm1,Aldh2,Aldh3a2,Arl6ip5,Atg3,Atg5,Atm,Atp7a,Camk2d,Cat,Coq9,Dkc1,Fbln5,Fbxl5,Fth1,G6pdx,Gclc,Gclm,Glmp,Glul,Gpx1,Gpx7,Gstz1,Hfe,Hmox1,Hus1,Jun,Lacc1,Lancl1,Lgals3,Meis1,Msra,Msrb1,Mtm1,Mut,Ndufs4,Nfe2l1,Nfe2l2,Nos3,Nox4,Nr3c2,Nrros,Pex13,Pik3c3,Pink1,Plekha5,Pon2,Ppm1k,Prdx1,Prdx3,Prdx4,Prdx6,Pten,Qdpr,Rab7,Rac1,Ralbp1,Rcan1,Rpl13a,Rrn3,Sdhd,Sgms1,Shc1,Slc4…
MP:0004197	abnormal fetal growth/weight/body size	3.11e-06	0.0001	152	4421	Common	Adam17,Alkbh1,Anks6,Ano6,Apc,Atmin,Baz1b,Birc6,Bmper,Brca2,Brd2,Brd7,C3,Cadm1,Caprin1,Carm1,Casc3,Chd2,Cntrl,Col27a1,Col4a3bp,Creb1,Crtap,Csnk1d,Cul4b,Cul7,Cxcr4,Daam1,Dgat2,Dgkd,Dhrs3,Dlg1,E2f3,E2f4,Egfr,Ehmt1,Elovl1,Ercc1,Eri1,Fbxw8,Fgfr2,Fgfrl1,Flnc,Fos,Fst,Fubp1,Gab1,Gabpa,Ghr,Glg1,Grb10,Hgf,Hnrnpd,Hspa5,Igf1,Igf2r,Ikbkap,Irs1,Itgb1,Jag1,Jak1,Jarid2,Jmjd6,Kat2a,Kat6a,Kdm2b,Kdm6b,Kidins220,Kit…
MP:0000930	wavy neural tube	3.18e-06	0.000102	29	4421	Common	Abi1,Ago2,Casp8,Cdh2,Cfl1,Csk,Emg1,Enpp2,Ep400,Gli3,Ift88,Itgb1,Kif3a,Lats2,Map3k7,Mthfd1,Mthfd1l,Pdgfra,Phactr4,Pten,Qk,Rapgef2,Rpl38,Shroom3,Slc25a19,Trim28,Vcl,Wasl,Xbp1
MP:0002435	abnormal effector T cell morphology	3.32e-06	0.000106	355	4421	Common	4933434E20Rik,Abcb1a,Acp2,Acsl3,Adam10,Adpgk,Aff1,Akap9,Aldh2,Anpep,Ap1g1,Apc,Arap2,Arhgef1,Arhgef6,Arid1b,Arid5a,Arid5b,Aspm,Atg3,Atg5,Atm,Atp11a,Atp13a2,Atp5f1,B2m,Bap1,Bcl3,Bcl6,Bclaf1,Becn1,Bhlhe40,Blnk,Bnip2,Btk,C3ar1,Cadm1,Caml,Casc4,Casp8,Cbl,Ccdc127,Ccl2,Ccr1,Ccr5,Cd1d1,Cd22,Cd274,Cd44,Cd48,Cd59a,Cd74,Cd83,Cd84,Cd86,Cdk6,Cdkal1,Cdkn1a,Cflar,Chd2,Chd4,Chd9,Ciita,Clpp,Cnot4,Cog6,Cops5,Coro1…
MP:0002132	abnormal respiratory system morphology	3.38e-06	0.000108	433	4421	Common	4933434E20Rik,Abca1,Abca3,Acan,Ackr3,Acvrl1,Adam17,Adamts2,Adcy9,Adgra2,Adgrf5,Adipoq,Aff4,Aggf1,Aimp1,Akap12,Akr1a1,Aldh1a3,Angpt2,Ank3,Anks6,Ap1b1,Ap3b1,Apaf1,App,Asah1,Atad5,Atf2,Atg5,Atmin,Atp11a,Atp7a,Atr,Atxn1l,B4galt1,Bag6,Bap1,Bbs4,Bclaf1,Becn1,Bid,Bloc1s6,Bmp4,Bmper,Bmpr1a,Bmpr2,Braf,Brd2,C1ra,C3ar1,Capns1,Carm1,Casp3,Casp8,Casp9,Cav1,Cav2,Cavin1,Cavin2,Cbx7,Cc2d2a,Cd163,Cd59a,Cdc73,Cdkn…
MP:0000607	abnormal hepatocyte morphology	3.56e-06	0.000113	99	4421	Common	Abcb10,Abcb7,Abcg2,Abhd5,Acad8,Acox1,Agl,Ahr,Alms1,Amfr,Atg5,Atg7,Birc6,Bpnt1,Brd4,Cdkn1b,Cln3,Cp,Egfr,Ei24,Ercc1,Ercc5,Ern1,Fah,Fas,Fbxl5,Glb1,Golm1,Gpam,Grn,Gsk3b,Gstz1,Hadha,Hdac3,Hexa,Hexb,Hgf,Hgsnat,Hmgcl,Hr,Ikbkb,Insr,Iqgap2,Jak1,Jarid2,Jun,Kdr,Kmt2b,Lgals3,Lipa,Lrp1,Man2b1,Manba,Map2k4,Map3k7,Med1,Mpv17,Mut,Naglu,Ncoa6,Ncor1,Nos3,Npc1,Phip,Pitpna,Plau,Pmm2,Pparg,Pros1,Psap,Pten,Ptpn11,Ptrh…
MP:0002019	abnormal tumor incidence	3.57e-06	0.000113	329	4421	Common	Acadvl,Acox1,Acvr1,Adam15,Aggf1,Ahr,Aldh2,Amfr,Anxa7,Apc,Arid4a,Arl6ip5,Atad5,Atf2,Atg4c,Atm,Atp2a2,Atp2c1,Atr,Bad,Bap1,Becn1,Bin1,Blnk,Braf,Brca2,Bub3,Camk2g,Cat,Cav1,Cbx7,Ccdc80,Ccl2,Ccndbp1,Ccng1,Cd34,Cd47,Cdc37,Cdc73,Cdk11b,Cdk5rap2,Cdkn1a,Cdkn1b,Cdkn2c,Cebpb,Cers2,Chd2,Chfr,Chordc1,Chuk,Ciz1,Cmip,Col4a2,Cop1,Cops6,Coro1c,Crebbp,Ctnnb1,Cul4a,Cul9,Cygb,Cyld,Cyp1b1,Cytip,Dclre1a,Ddx58,Dek,Dgkd,…
MP:0003945	abnormal lymphocyte physiology	3.6e-06	0.000113	508	4421	Common	Abcb1a,Acaca,Adcy9,Ahnak,Akap13,Apc,Appl1,Arhgdib,Arhgef1,Arhgef12,Arhgef5,Arhgef6,Arrb2,Ash1l,Atf3,Atg3,Atg5,Atm,Atmin,B2m,B3gnt5,Bad,Bax,Bbs4,Bbx,Bcl10,Bcl2l1,Bcl3,Bcl6,Bclaf1,Becn1,Bhlhe40,Birc2,Birc3,Birc6,Blnk,Bloc1s6,Bmi1,Braf,Brca2,Bst1,Btk,C3ar1,Cabin1,Cacnb3,Cadm1,Caml,Casp2,Casp8,Casp9,Cbl,Cblb,Cbx5,Ccl2,Ccnd3,Ccr1,Ccr5,Cd180,Cd1d1,Cd22,Cd274,Cd276,Cd2ap,Cd36,Cd37,Cd44,Cd48,Cd53,Cd59a,C…
MP:0011704	decreased fibroblast proliferation	3.79e-06	0.000119	76	4421	Common	Alg2,Arhgap1,Atm,Babam2,Brca2,Btrc,Cd44,Cdk7,Ctc1,Dcaf1,Dkc1,Dnm1l,Ep300,Fn1,Fndc3b,Gabpa,Glrx3,Gnl3,Hat1,Hspb1,Hus1,Igfbp7,Ino80,Itgb1,Jun,Kat2a,Kmt2a,Lig1,Lmna,Map3k7,Mapk1,Mapk3,Mcm4,Mcm9,Med1,Mgea5,Mif,Nbn,Ncoa4,Ncoa6,Npm1,Numa1,Patz1,Pdgfrb,Pggt1b,Phb2,Phc2,Pik3cb,Pkn2,Polb,Ppp5c,Psme3,Ptk2,Rad54l2,Raf1,Rbm3,Recql,Rheb,Rnaseh2b,Sept7,Shmt2,Sirt2,Skil,Slk,Smarcal1,Sod1,Stag1,Stip1,Tada3,Tln2,…
MP:0001622	abnormal vasculogenesis	4.03e-06	0.000126	36	4421	Common	Abi1,Capns1,Ccm2,Cd44,Cdh5,Crebbp,Ctgf,Ctnnb1,Cxcr4,Dock1,Enpp2,Ep300,Fbxw7,Fn1,Foxo1,Hdac7,Hsd17b7,Kdr,Paxip1,Pbx1,Pdcd10,Pdgfra,Plcg1,Plpp3,Pnpla6,Ptprb,Qk,Rad23b,Raf1,Ramp2,Rapgef2,Smad5,Tdg,Tgfbr3,Tra2b,Unc5b
MP:0000249	abnormal blood vessel physiology	4.18e-06	0.00013	215	4421	Common	Abcb1a,Abcc4,Abcc9,Abhd2,Acta2,Acvrl1,Adam15,Adam17,Adam9,Adamts7,Adgra2,Adipoq,Adm,Aggf1,Angpt2,Angptl4,Anpep,Anxa1,Ap1g1,Appl1,Aqp1,Arhgap42,Arhgef1,Arhgef12,Asl,Atp2a2,Atp2a3,Atp2b1,Atp2b4,Axl,Bcar1,Bmp4,Bmper,Bmpr2,C3,C4b,Cacnb3,Cav1,Ccl2,Ccm2,Ccr5,Cd44,Cd59a,Cd82,Cdh13,Cdh5,Chd2,Chrd,Cisd2,Clic4,Col3a1,Col4a1,Cpt1a,Crim1,Crk,Csrp1,Csrp2,Ctnnb1,Ctss,Cttn,Cul3,Cx3cr1,Ddah1,Dicer1,Dll4,Drosha,D…
MP:0008180	abnormal marginal zone B cell morphology	4.24e-06	0.000131	74	4421	Common	Ackr3,Adam10,Adpgk,Arhgef1,Bcl10,Bcl3,Birc3,Blnk,Casp8,Cd22,Cd72,Cog6,Cyld,Dock10,Dock2,Dock8,Ebf1,Ep300,Eps15,Fas,Fli1,Fnip1,Git2,Hax1,Huwe1,Ikbkb,Inpp5d,Irf8,Kdelr1,Lama5,Ltbr,Lyn,Magt1,Maml1,Map3k14,Mtor,Nedd9,Nfkb1,Nfkb2,Nfkbia,Notch2,Npy1r,Parp14,Pcid2,Pnp,Prkcd,Pten,Ptpn2,Ptpn6,Ptprj,Rbpj,Rgs1,Rnf10,Rras2,Sash3,Sgpl1,Sh3bp2,Siglec1,Slc25a28,Spen,Sppl2a,Srf,St6gal1,Stk4,Tbrg1,Tlr8,Tnfaip3,Tn…
MP:0008932	abnormal embryonic tissue physiology	4.24e-06	0.000131	158	4421	Common	Aatf,Acvr1,Adar,Ahctf1,Aifm1,Arid1a,Arl8b,Becn1,Bicc1,Bmp4,Bmpr1a,Bptf,Brd2,Capns1,Cdc73,Cdk11b,Cdk7,Cdk8,Cenpe,Cfl1,Chd7,Chd8,Chordc1,Chrd,Clpp,Cnbp,Cops2,Cops5,Cops8,Ctcf,Ctnnb1,Cul4b,Dab2,Dad1,Daxx,Ddx3x,Dhx9,Dido1,Dnmt1,Efnb1,Efnb2,Eloa,Erbb2,Ext1,Eya1,Ezh2,Fbxl5,Fgfr1,G6pdx,Gata6,Gclc,Grb2,Hand2,Hgf,Hif1a,Hsd17b12,Hspa5,Htt,Hus1,Ift46,Invs,Itgb1,Jun,Kat2a,Kat7,Kat8,Kdm2a,Kdm2b,Kdr,Kif3a,Lemd…
MP:0000783	abnormal forebrain morphology	4.25e-06	0.000131	502	4421	Common	4933434E20Rik,Abcb1a,Adam10,Adcy3,Adgra2,Adgrg1,Aga,Ago2,Agtpbp1,Aifm1,Akap13,Akt3,Aldh2,Ambra1,Ank2,Ank3,Anxa1,Ap3b1,Ap3m2,Ap4e1,Apaf1,Apc,Aph1a,App,Arfgef1,Arfgef2,Arhgap35,Arhgap5,Arid1a,Arid1b,Arih2,Arnt,Arpc3,Asns,Aspa,Aspm,Atg5,Atg7,Atp11a,Atp1a2,Atp1b2,Atp7a,Atr,Atrn,Atrx,Atxn1l,Axin1,B2m,B4galt1,B4galt2,Bad,Bag6,Basp1,Bbs2,Bbs4,Bbs7,Bcor,Bdnf,Bicd2,Bid,Bmi1,Bmp4,Bmpr1a,Braf,Brd2,Brpf1,Btg…
MP:0001716	abnormal placenta labyrinth morphology	4.46e-06	0.000137	103	4421	Common	Abca1,Adm,Ago2,Alkbh1,Arap3,Arnt,Atf2,Birc6,Braf,C3,Calcrl,Ccdc134,Ccm2,Ccnc,Chm,Ctbp2,Ctnnb1,Cul4b,Cyr61,Ddx3x,Dlc1,Dph3,Egfr,Egln1,Elavl1,Emg1,Erg,Ern1,Fbxw8,Fgfr2,Fgfrl1,Fubp1,G6pdx,Gab1,Ggnbp2,Grb2,Hgf,Hsf1,Hsp90ab1,Hus1,Il11ra1,Itgav,Itgb1,Itgb3,Itgb8,Lama5,Map2k1,Map3k3,Mapk1,Mapk14,Mapk7,Med1,Med24,Met,Mlst8,Mpi,Myh9,Ncoa6,Notch2,Nr2f2,Nsdhl,Numb,Pak4,Paxip1,Pbrm1,Pdgfb,Pdgfrb,Pdzrn3,Pkd2,…
MP:0005058	abnormal lysosome morphology	4.46e-06	0.000137	31	4421	Common	Acp2,Aga,Ap3b1,Asah1,Atg5,Atm,Atp13a2,Cln3,Ctsa,Ctsl,Glmp,Gnptab,Gusb,Hgsnat,Kif5b,Lamtor1,Lgmn,Lyst,Man2b1,Naglu,Neu1,Npc2,Pex5,Pink1,Plekhm1,Spg11,Tpp1,Uvrag,Vps35,Vps54,Zfyve26
MP:0000003	abnormal adipose tissue morphology	5.36e-06	0.000164	471	4421	Common	Abcg2,Acacb,Acad8,Acadvl,Ace,Acot13,Acot7,Acsf2,Adam12,Adamts1,Adcy3,Adgrf5,Adipoq,Adipor2,Adpgk,Aebp1,Afap1l2,Ahcyl1,Ahnak,Akap9,Alms1,Angptl2,Angptl4,Ank2,Ankrd26,Anxa1,Ap1s2,Ap4e1,Aplp2,Arhgap1,Arhgap5,Arhgef11,Arid5b,Arpc2,Arrb1,Arrb2,Arrdc1,Arrdc3,Asah1,Ash1l,Aspa,Ate1,Atf3,Atg12,Atl2,Atm,Atp6v0a1,Atp8b2,Atr,Atrn,B4galt1,Bag3,Baz1a,Bbs2,Bbs4,Bckdk,Bhlhe40,Braf,Brd2,Bscl2,Bzw2,C1qtnf1,C3,C3ar…
MP:0004113	abnormal aortic arch morphology	5.47e-06	0.000166	80	4421	Common	4933434E20Rik,Acvr1,Ap2b1,Atmin,Bmp4,Bmpr2,Brd2,Chd7,Chrd,Cmip,Col4a2,Cplane1,Crim1,Crkl,Cxcr4,Dhx35,Dicer1,Dnm2,Dynll1,Ece1,Ednra,Ephb4,Ermp1,Eya1,Fbln1,Fbln5,Flna,Fuz,Gata6,Gja5,H13,Hand2,Hprt,Ift140,Invs,Jag1,Jun,Kat6a,Lama5,Lmna,Ltbp1,Matr3,Megf8,Mgrn1,Mkl2,Morc2a,Myo9a,Ndst1,Nprl3,Nrp1,Nsun2,Paxip1,Pcsk5,Pdgfra,Pdgfrb,Pigv,Plxnd1,Prmt7,Prrc2b,Prrx1,Ptpn11,Qsox1,Rala,Rere,Rpgrip1l,Sec24b,Sema…
MP:0005376	homeostasis/metabolism phenotype	5.48e-06	0.000166	2199	4421	Common	2700049A03Rik,4930402H24Rik,4933434E20Rik,Abca1,Abca3,Abca5,Abca6,Abcb10,Abcb1a,Abcb7,Abcb8,Abcc1,Abcc10,Abcc3,Abcc4,Abcc9,Abcd1,Abcd3,Abcg2,Abcg4,Abhd12,Abhd16a,Abhd2,Abhd5,Abi1,Abraxas2,Acaa1a,Acaca,Acacb,Acad8,Acadl,Acadm,Acads,Acadvl,Acan,Acbd3,Ace,Ackr3,Acly,Aco1,Acot13,Acot7,Acox1,Acp1,Acsl4,Acsl5,Acss1,Acvr1,Acvr1b,Acvr2a,Acvrl1,Adam10,Adam17,Adam19,Adam8,Adam9,Adamts1,Adamts6,Adamts7,Adar…
MP:0000285	abnormal heart valve morphology	6.11e-06	0.000184	102	4421	Common	4933434E20Rik,Ackr3,Acvr1,Adam17,Adam19,Adamts9,Anks6,Arid1a,Arid2,Atg16l1,Bmp4,Bmpr1a,Bmpr2,Braf,Brd2,Capza2,Cc2d2a,Cir1,Cntrl,Cog6,Col4a2,Coro1c,Cplane1,Crebbp,Cxcr4,Cyfip2,Cyr61,Dchs1,Dctn5,Dhx35,Dock1,Efna1,Efnb2,Egfr,Ehmt1,Ep300,Fbn1,Fgfrl1,Flna,Fuz,Gja1,Gja5,H13,Hand2,Hectd1,Hoxa3,Hprt,Hspg2,Ift140,Igf2r,Invs,Jag1,Kctd10,Klf3,Matr3,Megf8,Meis2,Mgp,Myh10,Nf1,Nfatc1,Nos3,Nr1d2,Ntf3,Pdlim7,Phc…
MP:0006206	embryonic lethality between somite formation and embryo turning	6.47e-06	0.000195	66	4421	Common	Abcb7,Acly,Alg5,Ash2l,Atp2a2,Brca2,Cct3,Chrd,Cops3,Cops6,Cript,Ctdnep1,Cyfip1,Dido1,Dync1h1,Eef1e1,Eif2s2,Ercc3,Ets2,Ezh2,Fbxl5,Fgfr1,Fgl2,Glul,Gne,Hk2,Hsd17b12,Htt,Hyou1,Ippk,Kmt2b,Kmt2d,Lias,Lig3,Lrpprc,Map1b,Med1,Metap2,Mtap,Nckap1,Nup133,Pdcd10,Phb2,Pik3cb,Pikfyve,Poglut1,Prickle1,Ptk2,Qk,Rac1,Rbpj,Rgs4,Slc40a1,Smad4,Stim1,Suz12,Tln1,Tpt1,Trim33,Txnrd1,Ugdh,Vegfa,Vps41,Xrcc1,Zbtb17,Zfr
MP:0009867	abnormal ascending aorta morphology	7.21e-06	0.000216	18	4421	Common	Atp2a2,Atp7a,Ece1,Ednra,Fbln5,Fbn1,Gja1,Hectd1,Hspg2,Lox,Lrp1,Ltbp1,Pdgfrb,Plxnd1,Smarca4,Tgfb2,Tgfbr1,Tgfbr2
MP:0000278	abnormal myocardial fiber morphology	7.22e-06	0.000216	130	4421	Common	Aars,Abca5,Abcb8,Acadm,Acadvl,Ackr3,Adam17,Aifm1,Akap12,Akap6,Asl,Ate1,Atg5,Bag3,Bcar1,Bcl6,Bin1,Braf,Cacna1c,Cap2,Cast,Cav1,Cdh2,Cdkn1b,Cenpf,Chd2,Clu,Cnot3,Cryab,Csrp2,Ctsl,Dag1,Ddr2,Des,Dicer1,Dmd,Dnaja3,Dnm1l,Dtna,Dusp6,Egfr,Egln1,Emd,Erbb2,Fgfr1,Fstl1,Fxr1,Gas2l3,Gnaq,Hadhb,Hexim1,Hsd17b7,Ier3,Itgb1,Itpa,Jarid2,Jph2,Jup,Kdm4a,Klf15,Lama4,Large1,Lig3,Lmna,Lrp1,Map2k1,Map2k3,Map3k7,Mapk14,Mapk…
MP:0004097	abnormal cerebellar cortex morphology	7.55e-06	0.000224	174	4421	Common	Aars,Acp2,Adgrg1,Aff1,Aga,Agtpbp1,Ahi1,Aifm1,Akap12,Akt3,Als2,Ank3,Arcn1,Arsa,Atf2,Atg5,Atg7,Atm,Atp1b2,Atp7a,Atr,Atxn1,Atxn7,B4galt2,Bcl2l2,Bicd2,Bmi1,Braf,Cadps,Casp3,Ccnd2,Cdk5,Cdkn2c,Cep290,Cers2,Chp1,Clcc1,Cln3,Cntn1,Cp,Cstb,Cxcr4,Dab2ip,Dag1,Dner,Dnm1l,Ebf2,Egfr,Ei24,Eif2b5,Eno2,Fbxw7,Fgfr1,Fkrp,Fmr1,Foxp2,Fubp1,Fzd4,Gas1,Gba,Gja1,Glb1,Gli3,Glrb,Gm2a,Gnpat,Gnptab,Herc1,Hexb,Hgsnat,Hsd17b4,H…
MP:0002748	abnormal pulmonary valve morphology	7.56e-06	0.000224	37	4421	Common	4933434E20Rik,Ackr3,Adam17,Adam19,Arid1a,Braf,Brd2,Capza2,Cc2d2a,Cir1,Cplane1,Dock1,Efnb2,Fgfrl1,Fuz,Gja1,H13,Hectd1,Hoxa3,Hprt,Hspg2,Jag1,Matr3,Nfatc1,Ntf3,Phc1,Plce1,Prrc2b,Sh3pxd2a,Smad6,Smarca4,Ssr2,Tcf7l2,Tgfb2,Trappc9,Wrn,Zfpm2
MP:0002357	abnormal spleen white pulp morphology	7.59e-06	0.000224	167	4421	Common	Abcc10,Abcc4,Ackr3,Adam10,Adpgk,Ahr,Akap13,Arhgap1,Arhgef1,Asl,B3gnt5,Bcl10,Bcl3,Bcl6,Becn1,Bhlhe40,Birc3,Blnk,Bmi1,Btk,C3,C4b,C5ar1,Cacybp,Casp8,Cd22,Cd37,Cd72,Cd84,Cd86,Cdkn2c,Cebpb,Cflar,Cog6,Ctsd,Cul4a,Cxcr4,Cyld,Dck,Def6,Dhx36,Diaph1,Dido1,Dkc1,Dock10,Dock2,Dock8,Ebf1,Ep300,Eps15,Esr1,Ezh1,Ezh2,Fads2,Fas,Fli1,Fnip1,Fos,Galnt1,Gba,Git2,Gon4l,Grb2,Grk6,H2-Ab1,Hax1,Huwe1,Igbp1,Ikbkb,Ikzf1,Inpp5…
MP:0008211	decreased mature B cell number	7.68e-06	0.000226	150	4421	Common	Ackr3,Adam10,Aff1,Akap9,Arhgap17,Arhgef1,Arhgef6,Atmin,Bad,Bcl10,Bcl3,Bcl6,Birc3,Blnk,Bmi1,Bst1,Btk,Casp8,Cd22,Cd274,Cd59a,Cd72,Cd81,Cd84,Cog6,Cxcr4,Cyld,Dapp1,Diaph1,Dicer1,Dock10,Dock2,Dock8,Dynll1,Dyrk1a,Ebf1,Elk4,Ell2,Elmo1,Ep300,Esr1,Ets1,Ezh2,Fam92a,Fas,Fli1,Fnip1,Foxp1,Galnt1,Git2,Gpr183,Grb2,Hax1,Huwe1,Igbp1,Ikbkb,Ikzf1,Il6st,Il7r,Inpp5d,Irf2,Irf5,Irf8,Kdelr1,Klhl6,Kmt2d,Lama5,Ltbr,Lyn,Ma…
MP:0000280	thin ventricular wall	7.85e-06	0.00023	74	4421	Common	Aars,Adgrg6,Bcl6,Capn2,Casp8,Cav1,Ccm2,Cdkn1b,Cenpf,Col4a3bp,Crk,Dag1,Dlc1,Eloa,Ep300,Erbb2,Fgfr2,Foxp1,Gab1,Gja1,Gys1,Hdac7,Hexim1,Hspb7,Il6st,Itpa,Jun,Kdm6a,Lig3,Map3k7,Mdm4,Med1,Med24,Mef2c,Mtor,Mybbp1a,Myh10,Myh11,Nae1,Ncoa6,Ncor2,Nfat5,Nos3,Nr1d1,Pak4,Pdlim3,Pfkfb2,Phc1,Plrg1,Plvap,Pmm2,Pparg,Ptcd2,Ptger4,Ptpn11,Rb1cc1,Rheb,Rnf10,Scube3,Shc1,Slc6a6,Smad7,Sod2,Speg,Tab1,Tead1,Ubr4,Vegfa,Xbp1,…
MP:0009577	abnormal developmental vascular remodeling	8.17e-06	0.000239	39	4421	Common	Acvrl1,Ahr,Angpt2,Arap3,Arhgef15,Arnt,Ate1,Cacna1c,Ccm2,Ctnnb1,Cxcl12,Cxcr4,Dll4,Ednra,Efnb2,Erg,Flna,Hif1a,Itga5,Jag1,Map3k7,Matr3,Mib1,Myh11,Myocd,Numb,Pcsk5,Pdcd10,Ptger4,Ptgs2,Ptk2,Ptprb,Rbpj,Reck,Slco2a1,Smarca4,Tjp1,Tmem100,Vegfa
MP:0008552	abnormal circulating tumor necrosis factor level	8.5e-06	0.000248	82	4421	Common	Adam17,Apc,Arid5a,Arrb2,Ash1l,Brd2,C3,Cav1,Ccl2,Cd14,Cd44,Clic4,Dnase2a,Dusp1,Egfr,Egr1,Elavl1,Enpp2,F3,Fos,Foxo1,Gba,Hck,Hmgb1,Hmox1,Hnrnpd,Ifit2,Ifngr1,Ikbkb,Il10ra,Il6ra,Irak2,Irak4,Irf5,Itgal,Lacc1,Lgmn,Lyn,Map3k7,Mapkapk2,Mavs,Mertk,Mif,Myd88,Ncoa3,Nfe2l2,Nfil3,Nfkbia,Npy1r,Osmr,Parg,Parp1,Peli1,Prkce,Psmb10,Rab27a,Rc3h1,Rhbdf2,Rnf146,Rpl13a,Senp1,Sgms1,Sh3bp2,Siglec1,Sirt3,Sod1,Stat3,Stat6,…
MP:0000274	enlarged heart	9.02e-06	0.000262	297	4421	Common	Abca1,Abcb8,Abcc9,Abhd5,Acadvl,Acan,Ace,Ackr3,Acsl5,Acvr1,Acvrl1,Adam17,Adamts6,Adamts9,Adgrl3,Adipoq,Adm,Ago2,Ahr,Aifm1,Akap12,Akap13,Akap6,Ankrd26,Ap2b1,Ap4e1,Arhgef1,Arhgef15,Asxl2,Ate1,Atg5,Atp1a2,Atp1b1,Atp2a2,Bag3,Bicral,Bmp4,Bmpr2,Braf,Brd2,Bscl2,C1ra,Cab39l,Cacna1c,Cacnb3,Cacybp,Camta2,Cap2,Capn1,Cav1,Cavin1,Ccdc134,Ccm2,Ccnd2,Ccnd3,Cd2ap,Cd36,Cd83,Cdh2,Cdkn1a,Cdkn1b,Chd2,Chrd,Clcn3,Cnot3…
MP:0013560	abnormal endocrine gland morphology	9.12e-06	0.000264	470	4421	Common	4933434E20Rik,Abca1,Abca5,Abcc10,Abcc4,Abcd1,Acvr1b,Adam10,Adam19,Adamts1,Adamts6,Adipor2,Aff1,Ago2,Alms1,Anxa1,Anxa7,Ap1g1,Ap2b1,Apc,Apex2,Araf,Arhgap1,Arhgap5,Arid5b,Armc5,Asah1,Asl,Atf3,Atg16l1,Atg3,Atg5,Atm,Atmin,Atp11a,Atp6v1b2,Atr,B2m,B4galt1,Bad,Bag3,Bax,Bcl10,Bcl2l1,Bcl6,Bhlhe40,Bid,Bmi1,Bmp4,Bmpr1a,Bok,Braf,Brca2,Brd2,Cacybp,Cadm1,Caml,Capza2,Carm1,Casp3,Cav1,Cbl,Cbx4,Ccdc80,Ccnd3,Cd2ap,…
MP:0009956	abnormal cerebellar layer morphology	9.14e-06	0.000264	155	4421	Common	Aars,Acp2,Aff1,Aga,Agtpbp1,Ahi1,Aifm1,Akap12,Akt3,Als2,Ank3,Arcn1,Arsa,Atf2,Atg5,Atg7,Atm,Atp1b2,Atp7a,Atr,Atxn1,Atxn7,B4galt2,Bcl2l2,Bicd2,Bmi1,Braf,Cadps,Casp3,Ccnd2,Cdkn2c,Cers2,Chp1,Clcc1,Cln3,Cntn1,Cp,Cstb,Cxcr4,Dab2ip,Dner,Dnm1l,Ebf2,Egfr,Ei24,Eif2b5,Eno2,Fbxw7,Fmr1,Foxp2,Fzd4,Gas1,Gba,Gja1,Glb1,Gli3,Glrb,Gm2a,Gnpat,Gnptab,Herc1,Hexb,Hgsnat,Hsd17b4,Htra2,Inpp4a,Ireb2,Itpr1,Kmt2a,Ldb1,Lig3,L…
MP:0000454	abnormal jaw morphology	9.44e-06	0.000272	214	4421	Common	4930453N24Rik,Abhd5,Acvr1,Acvr1b,Acvr2a,Adamts2,Akap9,Alkbh1,Ank,Antxr1,Ap2b1,Apaf1,Apc,Arid1a,Arid5b,Atmin,Atpaf2,Atr,Baz1b,Bbx,Bmp4,Bmpr1a,Bnc2,Braf,Brd4,Cask,Ccl2,Cdc73,Cdkn1b,Cdon,Cep290,Chrd,Chuk,Cnbp,Cnnm4,Cplane1,Crebbp,Crkl,Csf1,Csf1r,Ctgf,Ctnnb1,Ctsk,Ctsl,Cyp51,Daam2,Dcn,Dctn5,Dhrs3,Disp1,Dlg1,Dock1,Dync2h1,Ece1,Edn1,Ednra,Ednrb,Egfr,Eya1,Fam20a,Fam20c,Fbln1,Fbn1,Fgfr1,Fgfr2,Fgfrl1,Fig4,…
MP:0002432	abnormal CD4-positive, alpha beta T cell morphology	9.61e-06	0.000275	259	4421	Common	4933434E20Rik,Acp2,Acsl3,Adam10,Akap9,Aldh2,Anpep,Ap1g1,Arap2,Arhgef1,Arhgef6,Arid5a,Atg3,Atg5,Atm,B2m,Bap1,Bcl3,Bcl6,Becn1,Bhlhe40,Blnk,Bnip2,Btk,C3ar1,Cadm1,Casp8,Ccdc127,Ccl2,Ccr1,Ccr5,Cd1d1,Cd22,Cd274,Cd44,Cd48,Cd59a,Cd74,Cd83,Cd84,Cd86,Cdk6,Cdkal1,Cdkn1a,Cflar,Chd2,Chd4,Chd9,Ciita,Clpp,Cnot4,Cog6,Coro1a,Crebbp,Csk,Ctcf,Ctsl,Cxcr4,Cyld,Dap,Dck,Dctn1,Ddah1,Ddhd1,Def6,Dennd1b,Denr,Diaph1,Dicer1…
MP:0005013	increased lymphocyte cell number	9.84e-06	0.000281	369	4421	Common	2310022B05Rik,Ace,Acp2,Acsl3,Adam10,Adm,Adpgk,Akap13,Akap9,Ano10,Anpep,Ap4e1,Apc,Arap2,Arhgap17,Arhgap22,Arhgef1,Arid4a,Arid5a,Arid5b,Atm,Atp11a,B2m,B4galt1,Bap1,Bax,Bcl10,Bcl2l1,Bcl3,Bclaf1,Bhlhe40,Birc3,Blnk,Bnip2,Bst1,Btk,Cadm1,Casp8,Ccdc127,Ccl2,Ccnd3,Ccr5,Cd22,Cd274,Cd36,Cd48,Cd59a,Cd72,Cd74,Cd86,Cdk6,Cdkn1a,Cdkn1b,Cdkn2c,Cds2,Cflar,Chd2,Chd4,Ciita,Clec4d,Clpp,Cnot4,Cog6,Coro1a,Crebbp,Crls1,…
MP:0001915	intracranial hemorrhage	9.91e-06	0.000281	70	4421	Common	Adam10,Adgra2,Aggf1,Alkbh1,Anxa7,Apaf1,App,Birc6,Braf,Casp9,Ccdc134,Ccm2,Cdc42,Cog6,Col4a1,Commd9,Crebbp,Ctnnb1,Cx3cr1,Ddb1,Erg,F3,Fbln1,Fbxw7,Fli1,Glrx3,Hdac8,Hprt,Hsf2,Hspg2,Itga7,Itgav,Itgb3,Itgb8,Jag1,Jam3,Kdm2b,Lamc1,Lemd2,Llgl1,Mapk7,Morc2a,Ndufs4,Notch4,Pcnt,Pdgfb,Pdgfrb,Plat,Plxnd1,Pnpla6,Por,Pros1,Psen1,Ptpn9,Rala,Rhbdf1,Runx1,Sec23a,Slc23a2,Ssr2,Syk,Tek,Tfpi,Tgfb1,Tnfrsf21,Tulp3,Ube4b,W…
MP:0005093	decreased B cell proliferation	9.91e-06	0.000281	70	4421	Common	Arhgef1,Arhgef6,Bcl10,Bcl3,Bcl6,Blnk,Btk,Casp8,Ccnd3,Cd22,Cd59a,Cd74,Cd81,Clec4d,Ctnnbl1,Dapp1,Ebf1,Ep300,Ercc1,Ets1,Ezh2,Fli1,Huwe1,Id3,Igbp1,Ikbkb,Ikzf1,Irak4,Irf2,Ly86,Lyn,Map3k14,Map3k7,Mark2,Mavs,Mcm3ap,Mtor,Myd88,Nbn,Nfatc1,Nfkb1,Nfkb2,Nfkbia,Parp14,Peli1,Pik3ap1,Pik3r1,Plcg2,Pnp,Ppm1d,Ppp2r3c,Prkdc,Ptpn6,Ptprc,Rnaseh2b,Rras2,Sema4d,Sh3bp2,Skap2,Slc3a2,Smad7,Sppl2a,Stat6,Stim1,Tent5c,Tlr4,T…
MP:0003674	oxidative stress	9.95e-06	0.000281	75	4421	Common	Abcb10,Abcc9,Abcg2,Abhd5,Adipoq,Adm,Aifm1,Aldh2,Aldh3a2,Atg3,Atg5,Atm,Atp7a,Camk2d,Coq9,Dkc1,Fbln5,Fbxl5,Fth1,Gclc,Gclm,Glmp,Glul,Gpx1,Gpx7,Gstz1,Hfe,Hmox1,Hus1,Jun,Lancl1,Lgals3,Meis1,Msra,Msrb1,Mtm1,Mut,Ndufs4,Nfe2l1,Nfe2l2,Nox4,Nrros,Pex13,Pik3c3,Pink1,Plekha5,Pon2,Ppm1k,Prdx3,Prdx4,Prdx6,Pten,Qdpr,Rab7,Rac1,Ralbp1,Rcan1,Rrn3,Sdhd,Sgms1,Shc1,Slc40a1,Sod1,Sod2,Sqstm1,Stat3,Steap4,Tigar,Trap1,Tr…
MP:0000130	abnormal trabecular bone morphology	1.01e-05	0.000284	156	4421	Common	Abhd5,Acan,Acp2,Adam17,Adam8,Adipoq,Akr1a1,Ank,Ano6,Atp6v1h,Atr,Bgn,Bmp4,Casp3,Cav1,Cd47,Cd68,Cdk7,Cebpb,Chsy1,Ciita,Cisd2,Cnot3,Col1a2,Creb3l1,Crtap,Csf1,Csf1r,Ctgf,Ctnnb1,Ctsk,Ctsl,Ebf1,Ebf2,Egr1,Eif4e3,Enpp1,Esr1,Evc2,F2r,Fam20c,Farp2,Fblim1,Fbn1,Fermt2,Fgfr2,Fig4,Fos,Fosl2,Gab2,Galc,Gba,Ghr,Gja1,Gnptab,Gpr65,Gsk3b,Hivep3,Hspg2,Htra1,Ibsp,Id1,Ifngr1,Igf1,Igf1r,Il6st,Inpp5d,Irak3,Irs1,Itgb2,Itg…
MP:0000914	exencephaly	1.01e-05	0.000284	117	4421	Common	Abi1,Alkbh1,Ambra1,Apaf1,Arfgef2,Arhgap35,Atmin,Atp11a,Atp2c1,Bag6,Bcl10,Bmper,Brd2,C2cd3,Casp9,Cc2d2a,Cfl1,Cnn3,Coro1c,Crebbp,Dvl2,Dync2h1,Dynll1,Emg1,Ep300,F2r,Furin,Fuz,Gadd45a,Gja1,Gli3,Gnb1,Gtf2i,Gtf2ird1,H13,Hdac8,Hectd1,Hmgxb3,Hspg2,Htt,Ift122,Ift140,Ift172,Ift88,Itgb1,Itpk1,Jmjd6,Jun,Kat2a,Kdm2b,Kdm6a,Kmt2b,Lama5,Lamc1,Lias,Lmo4,Lpar1,Lrp6,Luzp1,Map3k4,Marcks,Marcksl1,Mbd4,Med12,Megf8,Mth…
MP:0005602	decreased angiogenesis	1.01e-05	0.000284	56	4421	Common	Abi1,Angptl4,Atp2a2,Ccdc88a,Ccl2,Ccm2,Cd44,Cdh5,Chm,Clic4,Crebbp,Ctgf,Ctss,Dcbld2,Ddah1,Dusp3,Eng,Esam,F11r,Fbln5,Fbxw7,Fstl1,Fzd4,G6pdx,Hif1a,Icam1,Itgb4,Jag1,Map3k3,Map3k7,Mapk7,Mcam,Mmp14,Mmp2,Ndst1,Nr2f2,Nrp1,Pdgfrb,Pknox1,Plat,Plaur,Pld1,Plekhg5,Plxnd1,Ptk2,Rac2,Ramp2,Rap1a,Sdc4,Serpine1,Shc1,Smad5,Tlr2,Tlr4,Vegfa,Xbp1
MP:0020202	abnormal macrophage cell number	1.03e-05	0.000289	146	4421	Common	Actl6a,Adam17,Adam8,Adgrf5,Aimp1,Akr1a1,Ankrd11,Apc,Arhgap15,Asah1,Asl,Atg16l1,Bcl3,Birc3,Bmpr1a,C1qtnf7,C3,C3ar1,C4b,C5ar1,Ccl2,Cd200,Cd47,Cd59a,Cebpb,Cflar,Ciita,Cnot3,Csf1,Csf1r,Ctnnb1,Ctsk,Ctsl,Cxcr4,Dck,Dkk2,Dock2,Dok3,Ebf1,Egr1,Elavl1,Esr1,Farp2,Fblim1,Fcgr4,Fgfr2,Flt1,Fmnl1,Fos,Fosl2,Gab2,Gmds,Gnptab,Hivep3,Hmox1,Hr,Hspg2,Ibsp,Id1,Ifih1,Ifngr1,Igf1r,Ikzf1,Il6st,Inpp5d,Irak3,Irf8,Irs1,Itgam…
MP:0003723	abnormal long bone morphology	1.11e-05	0.000308	283	4421	Common	2700049A03Rik,Acan,Acsl4,Acvr1,Adam17,Adgrf5,Agl,Akap11,Aktip,Alkbh1,Ank,Ankib1,Ankrd27,Ano6,Antxr1,Ap4e1,Apc,Arid5b,Asah1,Ascc3,Atad2b,Atf2,Atp2b1,Atp6v0d1,Atxn7l3,Bbx,Bgn,Bmp4,Bmper,Bmpr1a,Bmpr1b,Bnip2,Cav1,Cd44,Cdc42,Cebpb,Chd2,Chsy1,Chuk,Col12a1,Col1a2,Col27a1,Col4a3bp,Cplane1,Creb3l2,Crtap,Csf1,Csf1r,Ctgf,Ctnna1,Ctnnb1,Ctsk,Ctsl,Cyp51,Ddr2,Dicer1,Dusp3,Dusp6,Dym,Ebf1,Ebf2,Egr1,Epdr1,Errfi1,E…
MP:0003799	impaired macrophage chemotaxis	1.12e-05	0.00031	34	4421	Common	Angptl2,B4galt1,Ccl2,Ccr5,Cdkn1a,Chuk,Cmklr1,Csf1,Cx3cr1,Flt1,Fmnl1,Hif1a,Ikbkb,Il33,Il4ra,Itga4,Itgb3,Jmjd6,Lgals3,Litaf,Mcoln2,Myo9b,Ninj1,Pik3cg,Plau,Plec,Ptk2b,Ptn,Rock1,S100a4,Selp,Spp1,Traf3ip2,Trpv2
MP:0002652	thin myocardium	1.16e-05	0.00032	61	4421	Common	Adam17,Adgrg6,Akap13,Ate1,Bcar1,Casp8,Cflar,Chd7,Des,Dnm1l,Eng,Ep300,Fgfr1,Fgfrl1,Gbe1,Hand2,Itgav,Jarid2,Jup,Kctd10,Lemd2,Lmna,Mapk1,Mapk14,Mapk7,Med1,Mgrn1,Mkl2,Naca,Ncoa6,Nf1,Pak4,Pdcd10,Pdgfb,Phc1,Pparg,Ppp2r5c,Prdm6,Ptpn11,Ptprj,Raf1,Rb1cc1,Rbl2,Rce1,Senp2,Shc1,Smg9,Srf,Srsf10,Tab1,Tdg,Tgfbr3,Tmem100,Tmod1,Ubp1,Vcam1,Vcl,Wnk1,Yap1,Zfpm2,Zmynd11
MP:0003920	abnormal heart right ventricle morphology	1.17e-05	0.000323	115	4421	Common	4933434E20Rik,Abca1,Ackr3,Acvr1,Adam17,Adam19,Adamts6,Ap2b1,Arid1a,Atp2a2,Baz1b,Bmp4,Bmpr2,Braf,Brd2,Cacna1c,Capza2,Cav1,Cavin1,Cc2d2a,Cdh2,Chrd,Cir1,Cntrl,Cplane1,Crk,Cxcr4,Daam1,Des,Dnaja3,Dock1,Edn1,Efnb2,Erg,Fbln5,Fbn1,Fgfr1,Fgfrl1,Flna,Fuz,Gab1,Gja1,Gucy1a1,H13,Hand2,Hccs,Hdac2,Hectd1,Hmox1,Hoxa3,Hprt,Hspg2,Ift172,Igf2r,Itgb1,Jag1,Jup,Klf3,Lmna,Lox,Mapk7,Matr3,Mef2a,Megf8,Myh10,Nae1,Ndst1,Nd…
MP:0010551	abnormal coronary vessel morphology	1.23e-05	0.000338	50	4421	Common	Adm,Ahr,Anks6,Arid2,Atp11a,Braf,Cmip,Cog6,Coro1c,Dync2h1,Egln1,Enpp1,Fas,Fstl1,Gja1,Hectd1,Hexim1,Hif1a,Hspg2,Ift88,Itga4,Jag1,Jarid2,Kdr,Lrp1,Ltbp1,Megf8,Mgrn1,Myh10,Nrp1,Pdgfb,Plekhg5,Plxnd1,Prmt7,Rpgrip1l,Rrm2b,Setd5,Sgcd,Smad6,Smarca4,Speg,Sptbn1,Tbx18,Tdg,Tgfbr1,Tgfbr2,Traf6,Vegfa,Zfpm2,Zmynd11
MP:0002113	abnormal skeleton development	1.24e-05	0.00034	238	4421	Common	2700049A03Rik,Acan,Acvr1,Adam17,Adam8,Akr1a1,Ank,Ano6,Apaf1,Apc,Aph1a,Arid5b,Asah1,Atf2,Atp2a2,Atp6v0d2,Atp6v1h,Atr,Bgn,Bmp4,Bmper,Bmpr1a,Bmpr1b,Casp3,Cav1,Cd44,Cd47,Cdc42,Cebpb,Chrd,Chsy1,Chuk,Cnot3,Col12a1,Col27a1,Col5a2,Creb3l1,Creb3l2,Crebbp,Crtap,Csf1,Csf1r,Ctgf,Ctnna1,Ctnnb1,Ctsk,Ctsl,Dchs1,Ddr2,Ddrgk1,Dicer1,Disp1,Dkk2,Dusp6,Dym,Ebf1,Ebf2,Efnb1,Eif2ak3,Elavl1,Enpp1,Epha2,Esr1,Evc2,Ext1,Ext…
MP:0004810	decreased hematopoietic stem cell number	1.29e-05	0.000353	48	4421	Common	Actl6a,Atg7,Bcr,Bmi1,Cdk6,Cdk7,Crebbp,Csnk1a1,Ctc1,Cul4a,Cxcl12,Ep400,Ercc1,Erg,Ezh1,Fbxw7,Foxo3,Gata2,Hax1,Hip1,Id1,Il6st,Jak2,Kat6a,Kdm1a,Kmt2a,Kmt2e,Mbtd1,Msi2,Pbx1,Pcid2,Pml,Prkdc,Ptpn11,Rapgef2,Rassf2,Rb1cc1,Rpl27a,Runx1,Ruvbl1,Sart3,Spi1,Thoc5,Tle4,Trp53,Tspan3,Upf2,Zfx
MP:0000351	increased cell proliferation	1.31e-05	0.000355	122	4421	Common	Acp1,Acvr1,Aldh3a2,Alms1,Ambra1,Apaf1,Apc,Arl13b,Atg7,Bag6,Bcor,Bmpr2,Braf,Cacybp,Cav1,Cbx7,Ccdc80,Cdkn1a,Cebpb,Cebpd,Chuk,Ctnna1,Ctnnd1,Ctsl,Cyld,Ddr1,Dicer1,Dok1,Dstn,Ednrb,Eef1e1,Ehd4,Ets1,Fas,Fbxo4,Fgfr2,Flcn,Flt1,Fos,Foxp1,Gadd45a,Hdac3,Hint1,Hmgn1,Hmox1,Hsd11b1,Htatip2,Ifngr1,Ift140,Ift20,Igf1r,Ikbkb,Il6st,Ing1,Itgb1,Jdp2,Kdm6b,Klf10,Klf4,Lrig1,Lum,Map3k7,Mapk14,Mef2c,Mta2,Mtss1,Mtus1,Myh11…
MP:0000208	decreased hematocrit	1.34e-05	0.000365	116	4421	Common	Ace,Aco1,Acvrl1,Adam10,Adam17,Add1,Adgrf5,Ago2,Apc,Arnt,B4galt1,Bnip3l,C9orf72,Cd47,Chd2,Ciapin1,Col4a1,Col4a2,Cp,Cul4a,Dctn5,Dpy19l3,E2f4,Elk4,Epas1,Epb41,Exoc6,Fbln1,Fbxo7,Fech,Fgfrl1,Fli1,Frzb,Gba,Gpi1,Hk1,Hmox1,Idh1,Ikzf1,Inhba,Ireb2,Irf8,Itgb1,Itgb3,Jak2,Jmjd6,Kitl,Kmt2e,Lama4,Ldha,Lgmn,Lig1,Mcat,Mcl1,Mcm3,Miga2,Mtus1,Myl12b,Myo1e,Nckap1l,Ncor1,Nfe2l1,Nfe2l2,Osmr,Pbx1,Pcid2,Pdgfb,Pfkm,Pgm3,P…
MP:0008415	abnormal neurite morphology	1.35e-05	0.000366	215	4421	Common	Acp2,Adgrg6,Aga,Agtpbp1,Als2,Ank2,Ank3,App,Arcn1,Arhgef15,Arhgef6,Arpc3,Arsa,Atg5,Atg7,Atm,Atxn1,Bace1,Basp1,Bcl2l2,Bdnf,Bicd2,Braf,Brd7,C1qa,C3,Cadps,Canx,Caprin1,Cav1,Ccdc88a,Ccnd2,Cd47,Cd86,Cdc42,Cers2,Cfl1,Chmp2b,Chp1,Ckap5,Clcn6,Cnp,Cntn1,Coq9,Cpeb4,Csf1,Cul4b,Cyfip2,Cyth1,Dab2ip,Dact1,Dag1,Dbn1,Dclk1,Depdc5,Dlg1,Dlg3,Dlg4,Dnm1l,Dpysl2,Dpysl3,Dst,Dusp1,Dync1li1,Ebf2,Efnb1,Efnb2,Ehmt1,Ei24,Ei…
MP:0001823	thymus hypoplasia	1.36e-05	0.000366	113	4421	Common	Adam10,Adamts6,Aff1,Ap2b1,Apc,Arhgap1,Arid5b,Atg3,Atmin,Bad,Bag3,Cacybp,Carm1,Cbl,Cbx4,Ccnd3,Cdk6,Chd4,Chd7,Ctcf,Ctsd,Cux1,Dck,Dhx36,Dll4,Dnajc11,Dnase2a,Dock1,E2f4,Ednra,Elavl1,Esr1,Ets1,Fbln1,Fbxw7,Fubp1,Hax1,Hnrnpl,Ikzf1,Il6st,Il7r,Jarid2,Jmjd6,Kat6a,Kdelr1,Kmt2e,Lama5,Lbr,Lcp2,Mcl1,Megf8,Msi2,Nampt,Nbn,Ncaph2,Nckap1l,Ndst1,Nfat5,Nfatc3,Nkap,Nlk,Noc2l,Nr3c1,Pbx1,Pdgfrb,Pfdn1,Phf20,Pigv,Pik3cg,…
MP:0005140	decreased cardiac muscle contractility	1.42e-05	0.000383	149	4421	Common	Aars,Abcb8,Abcc9,Abhd5,Acadvl,Adam17,Adcy6,Adipoq,Adm,Aifm1,Akap13,Ate1,Atp1a1,Atp1a2,Atp1b1,Atp2a2,Atp6ap2,Bag3,Bcar1,Bmpr1a,Cacna1c,Cacna2d1,Cap2,Capn1,Capns1,Cast,Cav1,Cdc42,Cdh2,Clcn3,Clu,Cnot1,Cnot3,Col4a3bp,Crem,Cryab,Ctsl,Ddr2,Des,Dicer1,Dmd,Dnaja3,Dnm1l,Dusp6,Efna1,Egfr,Egln1,Emd,Ep300,Erbb2,Fstl1,Gas2l3,Gja1,Glrx3,Gnaq,Hand2,Hdac3,Hif1a,Hprt,Hspb8,Ier3,Itgb1,Itgb3,Ivns1abp,Jup,Klf15,Lama…
MP:0002139	abnormal hepatobiliary system physiology	1.44e-05	0.000387	228	4421	Common	Abca5,Abcb10,Abcd3,Abcg2,Abhd5,Acaca,Acadl,Acox1,Adamts7,Adar,Ahr,Akap12,Aldh1a1,Aldh2,Amfr,Apc,Arih2,Arl3,Atg7,Atp8b1,Bbs4,Bcl6,C3,C3ar1,C4b,Casp8,Cav1,Ccar2,Ccdc134,Ccndbp1,Ccng1,Ccr5,Cd36,Cd44,Cdk2,Cdkn1a,Cebpb,Cenpe,Ces1d,Chd2,Clcn3,Clock,Cluh,Cox6a1,Crem,Crtc2,Csnk1a1,Ctsl,Cul4a,Cygb,Cyp27a1,Dbi,Degs1,Dicer1,Drosha,Efs,Egfr,Egr1,Eif6,Elovl5,Ercc1,Ern1,F2r,Fah,Fan1,Fas,Fbxl5,Fcgr2b,Fech,Fn1,F…
MP:0010771	integument phenotype	1.47e-05	0.000393	866	4421	Common	4930453N24Rik,Aars,Abcb10,Abcc3,Abcc4,Abcd4,Abcg2,Abhd5,Acacb,Acp2,Acvr1b,Adam17,Adam9,Adamts2,Adamts5,Adamts9,Adar,Adgrg1,Adm,Aebp1,Aebp2,Afap1l2,Aga,Ago2,Ahr,Aifm1,Aldh2,Aldh3a2,Aldh9a1,Angpt2,Angptl2,Ankrd1,Anpep,Anxa6,Ap1s2,Ap3b1,Apc,Arap3,Arcn1,Arhgap1,Arhgap5,Arid4a,Arih2,Arl6ip5,Arnt,Arpc2,Arpc4,Arrb2,Arrdc3,Asb1,Ash1l,Asl,Aspa,Ate1,Atf2,Atf3,Atm,Atox1,Atp1a2,Atp2a2,Atp2b1,Atp2c1,Atp7a,Atr…
MP:0002441	abnormal granulocyte morphology	1.49e-05	0.000396	284	4421	Common	4933434E20Rik,Abcb1a,Abhd5,Acbd5,Actl6a,Adam10,Adam17,Adgre5,Akna,Ankrd27,Apc,Arhgap15,Arhgap22,Arhgap25,Arhgef5,Arid4a,Asah1,Atp11a,B4galt1,B4gat1,Bag3,Bap1,Bcl6,Bcor,Bcr,Btk,C3,C3ar1,C4b,C9orf72,Casp8,Ccl2,Ccr1,Cd34,Cd44,Cd47,Cd59a,Cdh5,Cerk,Cflar,Chst15,Chst3,Ciz1,Clk1,Clpp,Cmklr1,Col4a3bp,Coro1a,Crebbp,Csf1,Csf1r,Csnk1g3,Ctnnb1,Cul4a,Cxcl12,Cxcr4,Ddrgk1,Ddx58,Dennd4c,Dhx33,Diaph1,Dicer1,Dido1…
MP:0001601	abnormal myelopoiesis	1.55e-05	0.000412	77	4421	Common	Adam10,Adam17,Bap1,Bnip3l,Btk,Cbl,Cflar,Chordc1,Csk,Cux1,Cxcl12,Cxcr4,Dicer1,Etv6,Fbxo4,Fli1,Gab2,Git2,Hip1,Hmga1,Id1,Ikzf1,Il10rb,Il13ra1,Il17ra,Il6st,Inpp5d,Irf8,Itgb2,Jak2,Kat6a,Kmt2a,Kmt2e,Lbr,Lyn,Mcat,Myh9,Ndst2,Nf1,Nfkb1,Nfkbia,Nlk,Npm1,Nras,Patz1,Pgm3,Pik3c2a,Pla2g4a,Pml,Pnp,Ppm1d,Prkdc,Ptpn11,Ptprc,Rac2,Rb1,Rb1cc1,Runx1,Samd9l,Scmh1,Senp1,Sh2b3,Sin3b,Slc29a3,Slc37a4,Smap1,Sod2,Spi1,St6gal…
MP:0006204	embryonic lethality before implantation	1.56e-05	0.000414	102	4421	Common	Aatf,Actr3,Ap1g1,Ap2m1,Arfgef2,Arpc3,Atp6v0c,B3gat3,B3gnt5,Capn2,Capn5,Casp8ap2,Ccnk,Cdc73,Cdk11b,Cdk8,Chchd3,Chd4,Ctnna1,Cttn,Dcaf1,Ddah1,Ddx20,Dmap1,Eif3b,Eif6,Emg1,Exoc1,Fbl,G2e3,Gli3,Glul,Gnl3,Gtf3c1,Hnrnpl,Hsbp1,Impdh2,Ints1,Itgb1,Kat5,Kmt2a,Kmt5a,Lifr,Lims1,Lrp6,Mapk8ip1,Matr3,Mcl1,Nasp,Nepro,Nsmce2,Nup214,Odf2,Pcna,Pcyt1a,Pes1,Pik3cb,Pikfyve,Plrg1,Pnn,Polr1b,Pomt2,Ppm1b,Prkra,Prpf19,Psmc3,…
MP:0002725	abnormal vein morphology	1.57e-05	0.000415	105	4421	Common	4933434E20Rik,Acvrl1,Adcy9,Adm,Ahr,Angptl4,Anks6,Ap1b1,Arnt,Atg16l1,Atp11a,Bmpr1a,Braf,Brd2,Capza2,Ccm2,Cdh5,Cep290,Cmip,Cog6,Col4a2,Col4a3bp,Commd9,Coro1c,Cpt2,Crim1,Ctnnb1,Dhx35,Dll4,Dmxl2,Dync2h1,Efnb2,Epha3,Ephb4,Erg,Fgfr2,Fli1,Flt4,Furin,Fut8,Fuz,Gja1,Gli3,H13,Hdac7,Hmgxb3,Hmox2,Hoxa3,Hspb7,Hspg2,Ift74,Ikbkap,Invs,Kctd10,Kif1bp,Med1,Mgp,Mkl2,Morc2a,Nf1,Nov,Npat,Nprl3,Nr2f2,Nsun2,Ntf3,Nxn,Osr…
MP:0020188	abnormal classified tumor incidence	1.66e-05	0.000437	226	4421	Common	Acox1,Ahr,Anxa7,Apc,Arid4a,Atad5,Atf2,Atm,Atp2a2,Atp2c1,Bad,Bap1,Becn1,Blnk,Braf,Brca2,Cbx7,Ccdc80,Ccndbp1,Cd34,Cdc37,Cdc73,Cdk11b,Cdk5rap2,Cdkn1a,Cdkn1b,Cdkn2c,Cers2,Chd2,Chfr,Chordc1,Chuk,Cop1,Crebbp,Ctnnb1,Cul9,Cyld,Cytip,Dclre1a,Ddx58,Dgkd,Dicer1,Dkc1,Dok1,Dok3,Eef1a1,Eef1e1,Efna1,Egr1,Eif4e,Elavl1,Errfi1,Esr1,Etv6,Ezh2,F3,Fah,Fbxo4,Fbxw7,Fgfr2,Flcn,Fli1,Fos,Fosl2,Foxo1,Foxo3,Fyn,Gnai2,Gon4l,…
MP:0000847	abnormal metencephalon morphology	1.74e-05	0.000458	235	4421	Common	Aars,Acp2,Adgrg1,Aff1,Aga,Agtpbp1,Ahi1,Aifm1,Akap12,Akt3,Als2,Ank3,Arcn1,Arfgef1,Arhgef2,Arsa,Atf2,Atg4b,Atg5,Atg7,Atm,Atp1b2,Atp7a,Atr,Atrn,Atxn1,Atxn7,B4galt2,Bax,Bcl2l1,Bcl2l2,Bdnf,Bicd2,Bmi1,Braf,Cadps,Canx,Casp2,Casp3,Ccm2,Ccnd2,Cdk5,Cdkn2c,Cep290,Cers2,Chp1,Clcc1,Cln3,Cntn1,Cp,Cplane1,Cstb,Ctnnb1,Cxcl12,Cxcr4,Dab2ip,Dag1,Ddb1,Dner,Dnm1l,Dst,Ebf1,Ebf2,Egfr,Ei24,Eif2b4,Eif2b5,Eif4h,Eno2,Ext1,…
MP:0002364	abnormal thymus size	1.8e-05	0.000469	211	4421	Common	Adam10,Adamts6,Aff1,Ap2b1,Apc,Apex2,Araf,Arhgap1,Arhgap5,Arid5b,Asah1,Atg3,Atm,Atmin,Atr,Bad,Bag3,Bcl6,Bhlhe40,Bmi1,Bok,Braf,Brca2,Brd2,Cacybp,Carm1,Cbl,Cbx4,Ccnd3,Cd2ap,Cdk6,Cdkn1b,Cdkn2c,Chd4,Chd7,Ciz1,Col4a2,Crebbp,Csf1,Csk,Ctc1,Ctcf,Ctsd,Ctsl,Cul4a,Cux1,Cyld,Dad1,Dck,Dhrs7b,Dhx36,Dll4,Dnajc11,Dnase2a,Dock1,E2f4,Ednra,Elavl1,Ep300,Erap1,Errfi1,Esr1,Ets1,Fads2,Fas,Fbln1,Fbxw7,Fos,Fubp1,Gabpa,Ga…
MP:0000282	abnormal interatrial septum morphology	1.81e-05	0.000472	70	4421	Common	4933434E20Rik,Ackr3,Acvr1,Adam19,Anks6,Ate1,Atp2a2,Baz1b,Bmp4,Brd2,Cc2d2a,Cep290,Cntrl,Col4a2,Coro1c,Cplane1,Crebbp,Cyr61,Dchs1,Dhrs3,Dync2h1,Ep300,Epha3,Fat4,Fbln1,Flna,Gja1,Gja5,H13,Hsd17b7,Ift74,Ift88,Kat6a,Klf3,Ltbp1,Megf8,Mgrn1,Morc2a,Nipbl,Nos3,Npat,Nr1d2,Nsd2,Ntf3,Osr1,Pcnt,Pcsk5,Pcsk6,Pds5a,Pds5b,Phc1,Pkd2,Plxnd1,Polb,Prickle1,Ptpn11,Rpgrip1l,Sema3d,Setd5,Sh3pxd2a,Sirt1,Smg9,Smo,Sos1,Sox9…
MP:0004057	thin myocardium compact layer	1.85e-05	0.00048	33	4421	Common	Arid2,Atp11a,Atp2a2,Braf,Brd2,Calcrl,Crebbp,Daam1,Egln1,Ep300,Ezh2,Foxp1,Gja1,Hexim1,Jmjd6,Kmt2d,Map3k7,Med1,Nae1,Ncoa6,Nf1,Nprl3,Pparg,Ptpn11,Smad4,Sptan1,Sptbn1,Ssr2,Tbx18,Vcam1,Vegfa,Ywhae,Zfpm2
MP:0010296	increased hemolymphoid system tumor incidence	1.9e-05	0.000493	125	4421	Common	Anxa7,Arid4a,Atad5,Atm,Bad,Bap1,Becn1,Blnk,Braf,Brca2,Cdc37,Cdkn1a,Cdkn2c,Chd2,Chfr,Chordc1,Cop1,Crebbp,Cul9,Dclre1a,Ddx58,Dicer1,Dkc1,Eef1a1,Egr1,Eif4e,Etv6,Ezh2,Fbxo4,Fbxw7,Flcn,Fli1,Gpx7,Hace1,Hip1,Hmga1,Hr,Htatip2,Id1,Ikzf1,Ing1,Inpp5d,Irf1,Irf8,Jak2,Kitl,Kmt2a,Lig1,Lmo2,Map3k8,Mcm2,Mcm3,Mcm4,Met,Mlh1,Msh2,Msh6,Mtf1,Mtss1,Mtus1,Nabp2,Nbn,Ncoa3,Ncstn,Ndrg1,Ndrg2,Nf1,Nf2,Nme1,Notch3,Npm1,Nras,N…
MP:0002144	abnormal B cell differentiation	1.93e-05	0.000499	181	4421	Common	Adam10,Akap13,Arhgap17,Arid5b,Atm,Atmin,Bad,Bax,Bcl10,Bcl3,Bcl6,Birc3,Blnk,Bmi1,Bst1,Btk,Cd22,Cd36,Cd37,Cd72,Cd74,Cd81,Cd86,Crebbp,Ctnnbl1,Cxcl12,Cxcr4,Cyld,Dck,Ddx58,Def6,Dicer1,Dll4,Dnmt1,Dock10,Dock2,Dynll1,Dyrk1a,Ebf1,Ell2,Ep300,Eps15,Ercc1,Erg,Ern1,Esr1,Ets1,Etv6,Ezh1,Ezh2,Fas,Fbxo7,Flcn,Fli1,Fnip1,Foxp1,Gcnt1,Gon4l,Grb2,Hax1,Hif1a,Hsd17b11,Htra2,Huwe1,Ifngr2,Igbp1,Ikbkb,Ikzf1,Il7r,Inpp5d,Ir…
MP:0003935	abnormal craniofacial development	1.97e-05	0.000507	185	4421	Common	2700049A03Rik,Acvr1,Acvrl1,Adam10,Akap13,Alkbh1,Antxr1,Ap2b1,Apaf1,Apc,Aph1a,Arhgap29,Arid1a,Atp11a,Atp7a,Baz1b,Bmp4,Bmper,Bmpr1a,Bnc2,Cask,Ccm2,Cdc42,Cdh5,Cdon,Chd7,Chrd,Chuk,Cpox,Crim1,Crk,Csf1,Csk,Ctgf,Ctnnb1,Ctsk,Dhrs3,Dicer1,Disp1,Dlc1,Dlg1,Ece1,Edn1,Ednra,Ednrb,Efnb1,Efnb2,Eng,Eya1,Fam20a,Fgfr1,Fgfr2,Flna,Foxn3,Foxo1,Fst,Fuz,Gab1,Gas1,Gja1,Gli3,Golgb1,Grb2,Gsk3b,Gskip,Gtf2i,Gtf2ird1,Hand2,H…
MP:0000160	kyphosis	2e-05	0.000513	119	4421	Common	Acan,Acp2,Agl,Ank,Ankrd11,Arhgap1,Arl6ip5,Ate1,Atr,Atxn1,Atxn1l,Atxn7,Bmp4,Braf,Cdc14b,Cdk5rap2,Cdk7,Cdo1,Chd2,Cisd2,Clcn3,Cnp,Col12a1,Col1a2,Col27a1,Col5a2,Dicer1,Efemp1,Ercc1,Fat1,Fat4,Fbn1,Fermt2,Flnb,Fosl2,Gba,Gnptab,Gtf2ird1,Hip1,Ikbkap,Irak3,Ireb2,Itga7,Jun,Kdm6b,Lama2,Large1,Lmna,Lrp1,Ltbp3,Mapk14,Mapk6,Mcat,Mecp2,Memo1,Mmp14,Mtf2,Mthfr,Mtm1,Mtor,Ndufs4,Neu1,Nfix,Nlgn2,Notch3,Npr2,Npr3,Nsu…
MP:0006138	congestive heart failure	2.01e-05	0.000514	63	4421	Common	Adipoq,Atg5,Atp2a2,Bag3,Cacna1c,Camta2,Cap2,Capns1,Cav1,Clcn3,Cnot3,Cryab,Des,Dicer1,Dnaja3,Dnm1l,E2f3,Epas1,Epha3,Gnaq,Hand2,Hprt,Hspb7,Igf2r,Itgb1,Kdr,Klf3,Lmna,Map3k1,Mdm4,Med1,Mgrn1,Mkl2,Mtor,Mtpn,Myh10,Npr1,Nr3c1,Pak1,Pcnt,Pdgfb,Phc1,Pik3c3,Ptger4,Ptpn11,Rab1a,Rb1cc1,Ryr2,Smarca4,Sod2,Sox9,Srf,Stat3,Tcap,Tgfbr2,Timp3,Tmod1,Tpm1,Ube4b,Vcl,Xiap,Yme1l1,Zfpm2
MP:0000602	enlarged liver sinusoidal spaces	2.02e-05	0.000515	35	4421	Common	4933434E20Rik,Acvrl1,Adcy9,Atp11a,Brd2,Capza2,Coro1c,Dbn1,Egln1,Fut8,H13,Hgf,Hspg2,Jak1,Jarid2,Kif1bp,Map2k4,Med1,Met,Mtf1,Nxn,Prrc2b,Rb1,Rpgrip1l,Rundc1,Setd5,Sh3pxd2a,Slc20a1,Smg9,Ssr2,Tcf7l2,Trim37,Ubr4,Xpnpep1,Zmynd11
MP:0010273	increased classified tumor incidence	2.04e-05	0.000519	225	4421	Common	Acox1,Ahr,Anxa7,Apc,Arid4a,Atad5,Atf2,Atm,Atp2a2,Atp2c1,Bad,Bap1,Becn1,Blnk,Braf,Brca2,Cbx7,Ccdc80,Ccndbp1,Cd34,Cdc37,Cdc73,Cdk11b,Cdk5rap2,Cdkn1a,Cdkn1b,Cdkn2c,Cers2,Chd2,Chfr,Chordc1,Chuk,Cop1,Crebbp,Ctnnb1,Cul9,Cyld,Cytip,Dclre1a,Ddx58,Dgkd,Dicer1,Dkc1,Dok1,Dok3,Eef1a1,Eef1e1,Efna1,Egr1,Eif4e,Elavl1,Errfi1,Esr1,Etv6,Ezh2,F3,Fah,Fbxo4,Fbxw7,Fgfr2,Flcn,Fli1,Fos,Fosl2,Foxo1,Foxo3,Fyn,Gnai2,Gon4l,…
MP:0008565	decreased interferon-beta secretion	2.06e-05	0.000522	20	4421	Common	Arhgef2,Cd200r1,Dhx58,Hcfc2,Hmox1,Ifnar1,Ifnar2,Irak4,Irf1,Irf7,Map3k8,Mavs,Mex3c,Msr1,Nlrc5,Peli1,Tbk1,Tlr3,Tlr4,Tradd
MP:0005371	limbs/digits/tail phenotype	2.14e-05	0.000541	485	4421	Common	2610301B20Rik,2700049A03Rik,Acan,Acsl4,Acvr1,Adam17,Adamts5,Adamts6,Adamts9,Adgrf5,Aebp1,Aebp2,Agl,Akap11,Aktip,Alkbh1,Angptl2,Ank,Ankib1,Ankrd27,Ano6,Anxa3,Ap3b1,Ap4e1,Apaf1,Apc,Arid5b,Ascc2,Ascc3,Aspn,Atad2b,Atf2,Atg7,Atp2b1,Atp5b,Atp6v0d1,Atp6v1d,Atp7a,Atxn7l3,Axin1,Bahd1,Bbs2,Bbs7,Bclaf1,Bgn,Blmh,Bmp4,Bmper,Bmpr1a,Bmpr1b,Bnip2,Brca2,Brd7,C2cd3,Cap2,Casc3,Cask,Cast,Cbl,Cc2d2a,Cd44,Cd47,Cdc42,C…
MP:0005567	decreased circulating total protein level	2.18e-05	0.000549	41	4421	Common	Abca6,Akap9,Aldh2,Amfr,Arpc4,Baz1b,Boc,Dbn1,Elk4,Esco1,Fkbp9,Foxo4,Ggnbp2,Gse1,Jak1,Kif21b,Lamb2,Ltbp1,Mgat2,Miga2,Myl12b,Neu1,Pear1,Pex3,Pikfyve,Plvap,Rnf10,Scube3,Sema3f,Slc38a10,Snip1,Sptbn1,Tbc1d2b,Tmem167,Tmem189,Tns2,Ubr1,Usmg5,Usp24,Usp54,Zmpste24
MP:0002082	postnatal lethality	2.28e-05	0.000574	569	4421	Common	Abca1,Abcb7,Abcc9,Acadm,Ace,Ackr3,Acvrl1,Adam12,Adam17,Adam19,Adamts1,Adar,Adarb1,Adcy3,Adcy7,Adk,Aff1,Ahi1,Ahr,Akap6,Akna,Angpt2,Angptl4,Ank2,Ank3,Ap3b1,Apaf1,Apc,Araf,Arhgap1,Arhgap35,Arid5b,Arih2,Arl13b,Arl3,Asl,Asxl2,Atf2,Atox1,Atp1b1,Atp1b2,Atp6ap2,Atp7a,Atr,Atrx,Atxn1l,B4galt1,Bace1,Bag3,Basp1,Baz1b,Bcl6,Bclaf1,Bdnf,Bicc1,Bicd2,Bmi1,Bmp4,Bmpr1a,Braf,Brca2,Brd2,Brd4,Brpf1,Bscl2,C1galt1c1,Cac…
MP:0001764	abnormal homeostasis	2.29e-05	0.000574	1893	4421	Common	2700049A03Rik,4930402H24Rik,4933434E20Rik,Abca1,Abca3,Abca5,Abca6,Abcb10,Abcb7,Abcb8,Abcc1,Abcc3,Abcc4,Abcc9,Abcd1,Abcd3,Abcg2,Abcg4,Abhd12,Abhd16a,Abhd5,Abi1,Abraxas2,Acaa1a,Acaca,Acacb,Acad8,Acadl,Acadm,Acads,Acadvl,Acan,Acbd3,Ace,Ackr3,Aco1,Acot13,Acot7,Acox1,Acsl4,Acsl5,Acss1,Acvr1,Acvr1b,Acvr2a,Acvrl1,Adam10,Adam17,Adam19,Adamts1,Adamts6,Adamts7,Adar,Adcy3,Adcy6,Adcy9,Adgrf5,Adgrg2,Adgrg6,Ad…
MP:0010499	abnormal ventricle myocardium morphology	2.3e-05	0.000576	66	4421	Common	Acvrl1,Adam17,Ate1,Atp2a2,Cap2,Daam1,Des,Dll4,Dnaja3,Egln1,Ep300,Erbb2,Fbln1,Fgfr2,Flrt2,Foxp1,Gja1,Gys1,Hand2,Hgsnat,Hspb7,Itgav,Jarid2,Jup,Klf3,Lats2,Map3k3,Map3k7,Mapk7,Med1,Med24,Mef2c,Megf8,Myh10,Ncoa6,Nipbl,Nox4,Nprl3,Nr2f2,Pdlim3,Pikfyve,Por,Pparg,Rb1cc1,Rbp4,Rbpj,Shc1,Smad4,Smad7,Sptbn1,Srf,Tbx18,Tead1,Tek,Tgfb2,Tgfbr3,Tmem100,Trim37,Ubp1,Vegfa,Wasf2,Wnk1,Xbp1,Ywhae,Zfp36l1,Zfpm2
MP:0003921	abnormal heart left ventricle morphology	2.49e-05	0.000621	188	4421	Common	4933434E20Rik,Abca1,Abcb8,Abhd5,Acadvl,Ackr3,Adam17,Adam19,Adamts6,Adh5,Adipoq,Adm,Aifm1,Akap12,Akap6,Anks6,Ap2b1,Arid1a,Atg5,Atp2a2,Baz1b,Bnip3l,Brd2,Cap2,Capn1,Capns1,Capza2,Cast,Cav1,Ccl2,Cdh2,Cenpf,Cnot3,Col1a2,Col4a2,Crk,Ctsl,Cxcr4,Cyfip2,Daam1,Dctn5,Des,Dicer1,Dnaja3,Dusp7,Efna1,Efnb2,Egfr,Egln1,F2r,Fbn1,Fgfr1,Fstl1,Gab1,Gbe1,Gja1,Gla,Gnaq,Hace1,Hand2,Hccs,Hdac3,Hdac9,Hexim1,Hif1a,Hmga1,Hox…
MP:0003172	abnormal lysosome physiology	2.7e-05	0.000671	30	4421	Common	Ap3b1,Atp13a2,Bloc1s5,Bloc1s6,C9orf72,Clcn6,Ctsd,Dync1li1,Galns,Gnptab,Gns,Hps1,Hps4,Ids,Igf2r,Lgmn,Lyst,M6pr,Manba,Nagpa,Npc1,Plekhm1,Sc5d,Slc29a3,Smcr8,Spg11,Tmem127,Tpp1,Vti1b,Zfyve26
MP:0005592	abnormal vascular smooth muscle morphology	2.76e-05	0.000684	57	4421	Common	Acvrl1,Adam19,Ahr,Bach1,Bmp4,Bmpr1a,Cacnb3,Calcrl,Ccm2,Col3a1,Crk,Cxcl12,Cxcr4,Des,Dll4,Eng,Enpp1,Fli1,Fn1,Fosl2,Hdac7,Itga7,Jag1,Lmna,Lox,Lrp1,Ltbp1,Map3k7,Mapk7,Mgp,Mkl2,Myocd,Notch2,Notch3,Nrp1,Ntf3,Parva,Pdgfb,Pdgfrb,Plekha1,Plod1,Plxnd1,Prkcd,Pros1,Ptprj,Ramp2,Rapgef1,Rock1,S1pr1,Sgcb,Sgpl1,Shc1,Smad5,Srf,Tgfbr1,Thbs1,Zfand5
MP:0008752	abnormal tumor necrosis factor level	2.83e-05	0.0007	100	4421	Common	Adam17,Ahr,Apc,Arid5a,Arrb2,Ash1l,B2m,Brd2,C3,Cav1,Ccl2,Cd14,Cd44,Cd47,Cebpb,Clic4,Crebbp,Cux1,Dnase2a,Dusp1,Egfr,Egr1,Elavl1,Enpp2,F3,Fos,Foxo1,Galc,Gba,Hck,Hmgb1,Hmox1,Hnrnpd,Htra2,Icam1,Ier3,Ifit2,Ifngr1,Ikbkb,Il10ra,Il6ra,Irak2,Irak4,Irf5,Itgal,Itgav,Jun,Lacc1,Lgmn,Lyn,Maged1,Map3k7,Mapkapk2,Mavs,Mertk,Mif,Myd88,Ncoa3,Nfe2l2,Nfil3,Nfkbia,Npy1r,Nr3c1,Osmr,Parg,Parp1,Pde4d,Peli1,Prkce,Psmb10,Ra…
MP:0005238	increased brain size	2.85e-05	0.000702	48	4421	Common	Adipor2,Akt3,Apaf1,Ate1,Casp9,Cd81,Cdkn1a,Cdkn1b,Ctnna1,Ctnnb1,Dag1,Depdc5,Dlg5,Dyrk1a,Fgfr2,Ghr,Gli3,Ift88,Igf2r,Kdm2b,Kifap3,Klf3,Mark2,Mbd5,Mecp2,Mut,Nbea,Nfix,Ophn1,Pak1ip1,Pdcd10,Phf2,Pten,Pura,Rb1,Rheb,Rhoa,Selenbp1,Sirt1,Slc12a6,Slk,Smarca1,Smo,Tmem67,Trp53,Tsc2,Wasl,Wdfy3
MP:0002020	increased tumor incidence	2.94e-05	0.000723	279	4421	Common	Acadvl,Acox1,Acvr1,Ahr,Aldh2,Amfr,Anxa7,Apc,Arid4a,Atad5,Atf2,Atg4c,Atm,Atp2a2,Atp2c1,Atr,Bad,Bap1,Becn1,Bin1,Blnk,Braf,Brca2,Bub3,Cat,Cav1,Cbx7,Ccdc80,Ccndbp1,Ccng1,Cd34,Cdc37,Cdc73,Cdk11b,Cdk5rap2,Cdkn1a,Cdkn1b,Cdkn2c,Cers2,Chd2,Chfr,Chordc1,Chuk,Ciz1,Cop1,Crebbp,Ctnnb1,Cul9,Cygb,Cyld,Cytip,Dclre1a,Ddx58,Dgkd,Dicer1,Dkc1,Dmtf1,Dnmt1,Dok1,Dok3,Eef1a1,Eef1e1,Efna1,Egr1,Eif4e,Elavl1,Epha2,Erbb2,Er…
MP:0008260	abnormal autophagy	3.05e-05	0.000747	55	4421	Common	Aars,Ambra1,Apc,Atg12,Atg16l1,Atg3,Atg4b,Atg4c,Atg5,Atg7,Atg9a,Atp13a2,Atp6ap2,Bag3,Becn1,Bnip3l,Cisd2,Clec16a,Cryab,Ei24,Fnip1,Gys1,Il33,Lamp2,Lrrk2,Mfn2,Mtm1,Mtor,Oxct1,Pik3c3,Pik3r4,Pld1,Pmp22,Psap,Rab7,Rb1cc1,Rock1,Rraga,Slc33a1,Smcr8,Snap29,Spg11,Tecpr1,Tmem184b,Trp53inp1,Tsc2,Ubr4,Ufl1,Ulk1,Usp19,Uvrag,Vcp,Vps18,Washc1,Xbp1
MP:0004200	decreased fetal size	3.12e-05	0.000762	113	4421	Common	Adam17,Alkbh1,Ano6,Apc,Atmin,Baz1b,Birc6,Bmper,Brca2,Brd7,C3,Cadm1,Caprin1,Carm1,Casc3,Chd2,Cntrl,Col27a1,Creb1,Csnk1d,Cul4b,Cxcr4,Daam1,Dgat2,Dgkd,Dlg1,E2f3,E2f4,Egfr,Ehmt1,Elovl1,Eri1,Fbxw8,Fgfr2,Flnc,Fos,Fst,Fubp1,Gabpa,Ghr,Glg1,Grb10,Hgf,Hspa5,Igf2r,Ikbkap,Irs1,Itgb1,Jak1,Jmjd6,Kat2a,Kat6a,Kdm2b,Kdm6b,Kidins220,Kitl,Lama5,Lamc1,Larp7,Lgr4,Lifr,Lmnb1,Mapk6,Mcm3,Meis2,Met,Mgat2,Mgea5,Mia3,Mnt,N…
MP:0003141	cardiac fibrosis	3.18e-05	0.000774	110	4421	Common	Aars,Abcb8,Acadl,Acadm,Ackr3,Ahr,Akap13,Akap6,Asxl2,Atp2a2,Atr,Bag3,Bcl6,Bnip3l,Cap2,Capns1,Cav1,Cenpf,Chd2,Cnot3,Coq9,Ctsl,Dag1,Des,Dmd,Dnaja3,Dnm1l,Dtna,Dusp6,Egfr,Egln1,Egr1,Entpd1,F3,Fbn1,Fosl2,Fstl1,Gas2l3,Gja1,Gnaq,Gys1,Hadhb,Hccs,Hdac3,Hmox1,Inpp5f,Itgb1,Jup,Lama4,Lmna,Lpl,Lrp1,Map2k3,Mapk14,Mapk8,Mdm4,Med1,Mef2d,Mtor,Mtpn,Myh10,Myocd,Nckap1l,Ndufs6,Nek6,Nexn,Nox4,Npr1,Npy1r,Nr3c1,Pak1,Pdg…
MP:0000172	abnormal bone marrow cell number	3.22e-05	0.000779	107	4421	Common	Abcc10,Actl6a,Adam17,Adar,Arhgap1,Arid5b,Atg7,Atr,Bcl6,Bmi1,Bnip3l,Braf,Brca2,Btk,Ccnd3,Cd47,Cdkn2c,Cebpb,Cflar,Chordc1,Crebbp,Csf1,Csnk1a1,Ctnnb1,Cul4a,Cxcl12,Cxcr4,Diaph1,Dicer1,Dkc1,Dst,Ebf1,Egr1,Elavl1,Ep400,Esr1,Ezh1,Fbxw7,Fnip1,Fubp1,Gab2,Gja1,Hax1,Hip1,Id1,Idh1,Ifngr1,Ikzf1,Il7r,Inpp5d,Irf8,Itgb2,Jak2,Kat6a,Kdm1a,Kitl,Kmt2a,Lig1,Meis1,Msi2,Ncor2,Ndfip1,Nfkbia,Nlk,Notch2,Npm1,Pbx1,Pcid2,Pfd…
MP:0001258	decreased body length	3.22e-05	0.000779	176	4421	Common	Abhd5,Acsl3,Acsl4,Adam17,Adar,Adgrf5,Akap11,Aktip,Ank,Ankrd11,Apc,Arhgap23,Arid1b,Arid5b,Arrdc3,Aspa,Ate1,Atr,Axin1,Baz1a,Bbx,Bmp6,Bmper,Bnip3l,Cbx5,Cdc42,Cdo1,Cfl2,Chd2,Chd7,Clip2,Clpp,Cnot3,Ctsk,Cul3,Daam2,Degs1,Dgat2,Dlg1,Dnajc10,Dock7,Dse,Dusp11,Dym,Dyrk1a,Egr1,Eif4g2,Eif4h,Esr1,Evc2,Eya3,Ezh1,Fam20c,Fgfr2,Fto,G6pc3,Ghr,Gigyf2,Gnptab,Gpx1,Grb2,Gsk3a,Gusb,Hbs1l,Hcfc1,Hdac8,Hectd3,Hfe,Hspg2,Igf…
MP:0010874	abnormal bone volume	3.22e-05	0.000779	92	4421	Common	Adam8,Adipoq,Akr1a1,Ank,Atp6v1h,Cd47,Cd68,Cebpb,Chsy1,Ciita,Col1a2,Cry2,Csf1,Ctnnb1,Ctsk,Dicer1,Evc2,F2r,Fam20c,Farp2,Fblim1,Fbn1,Fermt2,Fig4,Fos,Fosl2,Gnptab,Gpr65,Gsk3b,Hivep3,Htra1,Ibsp,Id1,Ifngr1,Igf1r,Inpp5d,Irak3,Itgb3,Jak1,Jdp2,Kitl,Klf10,Lifr,Lmna,Lrrk1,Mcph1,Mgp,Mmp2,Nabp2,Naca,Nbr1,Ncoa1,Ncor2,Nf1,Nos2,Notch2,Nov,P3h1,P3h4,Pdia3,Pdk4,Per2,Plcg2,Plekhm1,Postn,Ppard,Pparg,Ppib,Prdm5,Ptpn2…
MP:0003231	abnormal placenta vasculature	3.25e-05	0.00078	78	4421	Common	Arap3,Arnt,Atf2,Birc6,Braf,Ccm2,Cdh5,Chuk,Commd1,Ctbp2,Ctnnb1,Cyr61,Ddx3x,Dlc1,Dll4,Dph3,Elavl1,Emp2,Erg,Ern1,Fbxw8,Fgfr2,Fn1,Gab1,Ggnbp2,Hgf,Hsp90ab1,Hus1,Itgav,Itgb1,Itgb8,Lama5,Map2k1,Map3k3,Mapk1,Mapk14,Mapk7,Med1,Med24,Myh9,Ncoa6,Notch2,Nr2f2,Numb,Pak4,Parva,Paxip1,Pdgfb,Pdgfra,Pdgfrb,Pdzrn3,Pkd2,Pnpla6,Pparg,Procr,Pten,Ptk2,Raf1,Rbpj,Rictor,Rpl38,Sav1,Sdc4,Senp1,Setd2,Slk,Snx13,Ss18,Ssr3,Sy…
MP:0009250	abnormal appendicular skeleton morphology	3.25e-05	0.00078	348	4421	Common	2700049A03Rik,Acan,Acsl4,Acvr1,Adam17,Adamts2,Adamts6,Adgrf5,Agl,Akap11,Akap9,Aktip,Alkbh1,Ank,Ankib1,Ankrd27,Ano6,Antxr1,Ap4e1,Apc,Arid5b,Asah1,Ascc3,Ash1l,Atad2b,Atf2,Atp2b1,Atp6v0d1,Atp7a,Atxn7l3,Bbx,Bgn,Bmp4,Bmp6,Bmper,Bmpr1a,Bmpr1b,Bmpr2,Bnip2,Brca2,Cav1,Cd44,Cdc42,Cebpb,Chd2,Chsy1,Chuk,Col12a1,Col1a2,Col27a1,Col4a3bp,Cplane1,Creb3l2,Crebbp,Crtap,Csf1,Csf1r,Csrnp1,Ctgf,Ctnna1,Ctnnb1,Ctsk,Cts…
MP:0011913	abnormal reticulocyte cell number	3.25e-05	0.00078	60	4421	Common	Abcb10,Add1,Ago2,Atad5,Bnip3l,Cd47,Cd59a,Cdk5rap2,Chordc1,Dck,Dhx36,E2f4,Epas1,Epb41,Exoc6,Fech,Foxo3,Gpi1,Hk1,Hyal2,Ikzf1,Itgb3,Jak2,Kdm1a,Kitl,Klf3,Lama4,Ldha,Lgmn,Lig1,Man2a1,Mcat,Mcm3,Mcm4,Mgat2,Myo1e,Nckap1l,Nfe2l2,Npm1,Pfkm,Picalm,Prdx1,Prkaa1,Prkab1,Prkag1,Prkg1,Pura,Rhbdf1,Sgpl1,Slc11a2,Slc20a1,Slc40a1,Smap1,Sptlc2,Stat5b,Steap3,Tiparp,Ttc7,Ulk1,Uros
MP:0008182	decreased marginal zone B cell number	3.35e-05	0.0008	53	4421	Common	Ackr3,Adam10,Arhgef1,Bcl10,Bcl3,Blnk,Casp8,Cd22,Cog6,Dock10,Dock2,Dock8,Ebf1,Ep300,Fas,Fnip1,Git2,Hax1,Huwe1,Ikbkb,Inpp5d,Lama5,Ltbr,Lyn,Maml1,Map3k14,Mtor,Nedd9,Nfkb1,Nfkb2,Nfkbia,Notch2,Npy1r,Parp14,Pcid2,Pnp,Ptpn2,Ptpn6,Rbpj,Rras2,Sash3,Sgpl1,Sppl2a,Srf,St6gal1,Stk4,Tlr8,Tnfaip3,Tnfsf13b,Unc93b1,Was,Wipf1,Zeb1
MP:0005319	abnormal enzyme/coenzyme level	3.59e-05	0.000856	316	4421	Common	Abca6,Abcb7,Abhd5,Acaa1a,Acaca,Acacb,Acad8,Ace,Acox1,Adar,Adcy3,Adcy6,Afap1l2,Agl,Aifm1,Akap9,Aldh2,Amfr,Anapc4,Ank,Ano10,Ap3b1,Ap4e1,Aqp1,Arrb2,Asl,Aspa,Atg7,Atp6v1h,Atp8b1,B4gat1,Bap1,Bbs4,Bcr,Bicd1,Boc,Bpnt1,C3,Casp8,Cd84,Cdc26,Cdipt,Cebpb,Cfap36,Chd9,Chn1,Cisd2,Clpp,Cluh,Cog2,Col4a1,Coq9,Creb3l1,Ctdsp1,Ctso,Cybc1,Cystm1,Daam2,Dag1,Dbn1,Dclk1,Degs1,Dmd,Dnm1l,Dusp1,Dynll1,Dysf,Egr1,Eif2ak3,Eif4…
MP:0008172	abnormal follicular B cell morphology	3.63e-05	0.000861	58	4421	Common	Adam10,Arhgef1,Bcl10,Bcl3,Birc3,Blnk,Btk,Cd72,Cog6,Cyld,Dock10,Ell2,Fas,Fli1,Grb2,Hax1,Huwe1,Igbp1,Ikbkb,Irf8,Kdelr1,Klhl6,Kmt2d,Lyn,Map3k14,Mtor,Nedd9,Nfkb2,Nfkbia,Notch2,Parp14,Pcid2,Pgm3,Pik3ap1,Plcg2,Ppp2r3c,Prkcd,Ptpn2,Ptpn22,Ptpn6,Ptprc,Rbpj,Rras2,Sgpl1,Sh3kbp1,Siglec1,Slc25a28,Spen,Sppl2a,Tle4,Tlr8,Tnfaip3,Tnfsf13b,Traf3,Traf3ip2,Was,Wipf1,Zbtb1
MP:0010876	decreased bone volume	3.63e-05	0.000861	58	4421	Common	Adam8,Adipoq,Akr1a1,Ank,Atp6v1h,Cebpb,Chsy1,Ciita,Col1a2,Ctnnb1,Ctsk,Evc2,Fam20c,Fblim1,Fbn1,Fermt2,Fig4,Fosl2,Gnptab,Gpr65,Id1,Ifngr1,Igf1r,Inpp5d,Irak3,Jak1,Kitl,Klf10,Lifr,Lmna,Mcph1,Mgp,Mmp2,Nabp2,Naca,Ncoa1,Notch2,Nov,P3h1,P3h4,Pdia3,Postn,Ppard,Ppib,Prdm5,Ptpn2,Rassf2,Rnf146,Serpinf1,Sh3bp2,Slc39a14,Smad1,Snx10,Spop,Tmem119,Twsg1,Usp1,Wrn
MP:0000807	abnormal hippocampus morphology	3.77e-05	0.00089	178	4421	Common	Abcb1a,Agtpbp1,Akt3,Aldh2,Ank3,Ap3m2,App,Arfgef1,Arid1b,Arpc3,Atg5,Atg7,Atp7a,Atrx,Bad,Basp1,Bbs2,Bbs4,Bbs7,Bdnf,Bicd2,Bid,Bmi1,Braf,Brpf1,Btg1,C1qa,C3,Cadm1,Cadps,Cav1,Ccdc88a,Cd81,Cdk5,Cdk5rap2,Cdkn1b,Cers2,Chd7,Chmp2b,Ckap5,Ckb,Clcn3,Cln3,Col4a1,Csf1,Cspg4,Cst3,Ctnnb1,Ctnnd1,Ctsd,Cxcr4,D430042O09Rik,Dag1,Dbn1,Dlg4,Dpysl3,Dyrk1a,Ehmt1,Ei24,Eif4ebp2,Eno2,Fkrp,Fmr1,Fyn,Gak,Gba,Gdi1,Gja1,Gli3,Gnpt…
MP:0005164	abnormal response to injury	3.78e-05	0.00089	284	4421	Common	Abcb10,Abcc9,Abhd2,Ace,Acp1,Acvrl1,Adam9,Adamts7,Adipoq,Aebp1,Ahi1,Ahr,Aifm1,Aimp1,Akap13,Ankrd1,Anxa1,Apod,Arhgap1,Arpc3,Atp1b1,Atp2a2,B4galt1,Bach1,Becn1,Bid,Bnip3,Bnip3l,Braf,C1qtnf7,C3,Camk2d,Camk2g,Camta2,Capns1,Casp8,Cav1,Ccl2,Ccnd2,Ccr1,Ccr5,Cd1d1,Cd274,Cd2ap,Cd36,Cd44,Cd55,Cd59a,Cd82,Cdkn1a,Cdkn1b,Cebpd,Cemip,Cfl1,Cfp,Clic4,Clock,Coro7,Cp,Cplane1,Csrp1,Csrp2,Cst3,Ctnnb1,Cul4a,Cul5,Cx3cl1,…
MP:0004881	abnormal lung size	3.79e-05	0.000892	99	4421	Common	Abca3,Acan,Adam17,Adgra2,Adgrf5,Atg5,Atmin,Atp7a,Atr,Bag6,Capns1,Cdc73,Cplane1,Creb1,Crebbp,Ctgf,Cyld,Dchs1,Dennd1b,Dicer1,Dlg1,Dynll1,Errfi1,Esr1,Eya1,Fat4,Fbln1,Fgfr2,Fosl2,Fstl1,Fubp1,Fuz,Fxr1,Gli3,Gnaq,Gpi1,Grb10,Hck,Hectd3,Hif1a,Hspb8,Hyal1,Ift88,Igf2r,Itga3,Kdm1a,Kifap3,Klf3,Lama5,Lamc1,Ldha,Lox,Lrp4,Mapk14,Mapk6,Mark2,Mgp,Mmp14,Nek6,Nfe2l2,Nfib,Npc1,Npc2,Nr3c1,Nubp1,Pbrm1,Pbx1,Pcnt,Pcsk5,P…
MP:0000601	small liver	3.89e-05	0.000912	118	4421	Common	Adar,Ahr,Arf6,Arhgap1,Arih2,Atp11a,Atr,Bag1,Bag3,Bcar1,Braf,Brd1,C1qtnf7,Casp8,Ccdc134,Ccdc3,Ccng1,Cdc73,Cdh5,Ces1d,Ciapin1,Cnot3,Crbn,Ddrgk1,Dicer1,Dnajb9,Dusp1,Dyrk1a,Efemp1,Eif2ak4,Eif3m,Eif6,Ercc5,Ern1,Fabp5,Fli1,Fubp1,Gab1,Gata2,Ghr,Glb1,Glmp,Grb14,Hectd3,Hgf,Hif1an,Ikbkb,Ikzf1,Insr,Jak2,Jarid2,Jmjd6,Jun,Jup,Kat6a,Kdm1a,Kitl,Kmt2a,Lgr4,Lig1,Lrrc8c,Mapk14,Mapk6,Mapk8,Mapk8ip1,Mbd5,Mbtd1,Meis1…
MP:0008007	abnormal cellular replicative senescence	3.98e-05	0.000931	49	4421	Common	Atmin,Atr,Babam2,Bmi1,Brca2,Cdc14b,Cdk5rap2,Cdkn1a,Clpp,Ctc1,Cul7,Cyr61,Dicer1,Eif4e,Eloa,Ep300,Ercc1,Ezh1,Gnl3,Hif1a,Ing1,Ino80,Kdm5a,Kmt2a,Mcm9,Mgea5,Mtf2,Ncoa4,Ninj1,Nono,Pa2g4,Patz1,Pcbp4,Phc2,Scmh1,Sirt2,Skil,Slx4,Smurf2,Sod2,Telo2,Terf1,Tpp2,Trim27,Trp53,Uimc1,Usp4,Xrcc6,Zfp277
MP:0005452	abnormal adipose tissue amount	4.11e-05	0.000959	359	4421	Common	Abcg2,Acacb,Acot13,Acot7,Acsf2,Adam12,Adamts1,Adcy3,Adgrf5,Adipoq,Adpgk,Aebp1,Afap1l2,Ahcyl1,Ahnak,Akap9,Alms1,Angptl2,Angptl4,Ank2,Ankrd26,Ap1s2,Ap4e1,Aplp2,Arhgap1,Arhgap5,Arid5b,Arpc2,Arrb1,Arrb2,Arrdc1,Ash1l,Aspa,Ate1,Atf3,Atg12,Atl2,Atm,Atp6v0a1,Atp8b2,Atr,Atrn,B4galt1,Bag3,Baz1a,Bbs4,Bckdk,Bhlhe40,Braf,Brd2,Bscl2,Bzw2,C1qtnf1,C3,Camkk2,Cav1,Cbl,Ccar2,Ccdc3,Ccdc80,Ccny,Cd14,Cd36,Cd84,Cdc73,C…
MP:0004848	abnormal liver size	4.16e-05	0.000967	228	4421	Common	Abcd3,Abhd5,Acan,Acox1,Acvrl1,Adar,Agl,Ahr,Akap10,Alms1,Apc,Arf6,Arhgap1,Arid4a,Arih2,Atg7,Atp11a,Atp8b1,Atr,Bag1,Bag3,Bbs4,Bcar1,Bckdk,Bpnt1,Braf,Brd1,Bscl2,C1qtnf7,Casp8,Cav1,Ccdc134,Ccdc3,Ccng1,Cdc73,Cdh5,Ces1d,Chordc1,Ciapin1,Cnot3,Cpe,Crbn,Ctsa,Cul3,Cyp27a1,Ddrgk1,Dhx36,Dicer1,Dnajb9,Dnajc15,Dusp1,Dyrk1a,Efemp1,Egln1,Egr1,Ei24,Eif2ak4,Eif3m,Eif6,Ercc5,Ern1,Fabp5,Fads2,Fas,Fech,Fli1,Fth1,Fubp…
MP:0005388	respiratory system phenotype	4.22e-05	0.000978	664	4421	Common	4933434E20Rik,Abca1,Abca3,Acan,Ackr3,Acvrl1,Adam17,Adamts2,Adamts7,Adcy9,Adgra2,Adgrf5,Adipoq,Adk,Adm,Aff4,Aggf1,Agl,Ahr,Aimp1,Akap12,Akna,Akr1a1,Aldh1a3,Angpt2,Ank3,Anks6,Ap1b1,Ap3b1,Apaf1,App,Aqp1,Arhgap5,Arid4a,Arih2,Arl13b,Asah1,Ash1l,Atad5,Atf2,Atf3,Atg5,Atmin,Atox1,Atp11a,Atp1a2,Atp1b1,Atp2a2,Atp7a,Atr,Atxn1l,Azi2,B4galt1,Bag3,Bag6,Bap1,Bbs4,Bcl6,Bclaf1,Bdnf,Becn1,Bid,Bloc1s6,Bmi1,Bmp4,Bmpe…
MP:0008772	increased heart ventricle size	4.23e-05	0.000978	122	4421	Common	Abca1,Abcb8,Abhd5,Ackr3,Acvr1,Adam17,Adam19,Adamts6,Akap6,Ap2b1,Atp2a2,Baz1b,Bmp4,Bmpr2,Cacna1c,Cav1,Cavin1,Cdh2,Chrd,Cnot3,Col4a3bp,Crk,Ctsl,Des,Dnaja3,Edn1,Egfr,Erg,Fbln5,Fbn1,Fgfr1,Fstl1,Gab1,Gja1,Gla,Gnaq,Gucy1a1,Hand2,Hccs,Hdac9,Hexim1,Hif1a,Hmga1,Hmox1,Hspb8,Ier3,Ift172,Igf2r,Itgb1,Itgb3,Jag1,Jup,Klf15,Klf3,Lama4,Lmna,Lox,Lrp1,Map2k1,Map2k3,Mapk14,Mapk7,Mef2a,Mef2c,Mtor,Mtpn,Myocd,Nae1,Ncor…
MP:0002295	abnormal pulmonary circulation	4.3e-05	0.000992	47	4421	Common	Abca1,Abca3,Acvrl1,Adm,Aggf1,Ap3b1,Ash1l,Atox1,Atp7a,Braf,Cav1,Chd2,Epha3,Erg,Fbln5,Fbn1,Fgfr2,Gba,Git1,Gsn,Heg1,Hspa5,Hspg2,Inpp5d,Lox,Lyz2,Man1a2,Mkl2,Mut,Nfe2l2,Nos3,Npr1,Ntf3,Pdgfa,Plat,Prdm6,Prdx6,Psen2,Ptger4,Slit3,Smarca4,Tgfb3,Tgfbr1,Tgfbr2,Thbs1,Timp1,Vegfa
MP:0013229	abnormal brain ventricle size	4.39e-05	0.00101	97	4421	Common	Adgra2,Aga,Ank2,Ap4e1,Arfgef1,Asns,Aspa,Aspm,Atf2,Atp1b2,Atp6ap1,Atxn1l,B4galt2,Basp1,Bbs2,Bbs4,Bbs7,Bicd2,Brd2,Cacna1c,Cdc42,Cdk5rap2,Cdon,Cfl1,Chn1,Clcn3,Col4a1,Csf1r,D430042O09Rik,Ddb1,Dnm1l,Ei24,Eif4h,Eml1,Fgfr2,Fgfrl1,Fig4,Gja1,Hfe,Hif1a,Hsf2,Htt,Ift172,Itgb8,Kidins220,Kif2a,Lbr,Luzp1,Lztfl1,Magi2,Map1b,Marcksl1,Morc2a,Mycbp2,Myh10,Myo9a,Nfib,Nfix,Nrd1,Patz1,Pcnt,Pdcd6ip,Phgdh,Podxl,Prickle1…
MP:0011097	embryonic lethality between somite formation and embryo turning, complete penetrance	4.48e-05	0.00103	54	4421	Common	Abcb7,Acly,Alg5,Ash2l,Atp2a2,Brca2,Chrd,Cops3,Cript,Cyfip1,Dido1,Dync1h1,Eif2s2,Ercc3,Ets2,Ezh2,Fbxl5,Fgfr1,Glul,Hk2,Hsd17b12,Htt,Hyou1,Ippk,Kmt2d,Lias,Lrpprc,Map1b,Metap2,Mtap,Nckap1,Nup133,Pdcd10,Phb2,Pik3cb,Pikfyve,Poglut1,Prickle1,Ptk2,Qk,Rac1,Rbpj,Slc40a1,Suz12,Tln1,Tpt1,Trim33,Txnrd1,Ugdh,Vegfa,Vps41,Xrcc1,Zbtb17,Zfr
MP:0000780	abnormal corpus callosum morphology	4.51e-05	0.00103	77	4421	Common	Akt3,Ank2,Ap4e1,App,Arfgef1,Arhgap35,Arhgap5,Arid1b,Atr,Bicd2,Bmi1,Brpf1,Canx,Casp9,Cd81,Chd7,Clip2,Csf1r,Ctnnb1,Dclk1,Efnb1,Eif4h,Enah,Ext1,Fgfr1,Fgfr2,Fyn,Galc,Gli3,Hfe,Hsf1,Hspa5,Ireb2,Itpr3,Itsn1,Kif3a,Map1b,Map2k4,Map3k12,March7,Marcks,Marcksl1,Mbp,Mycbp2,Napa,Nfia,Nfib,Nfix,Nipbl,Nos2,Npc1,Nrp1,Ntn1,Pdha1,Pfdn1,Plaa,Prnp,Ptbp2,Pten,Rab18,Rac1,Robo1,Rpgrip1l,Slc12a6,Slc17a5,Slc33a1,Smarcb1,S…
MP:0000203	abnormal circulating aspartate transaminase level	4.7e-05	0.00107	80	4421	Common	Abhd5,Acaa1a,Acaca,Adar,Agl,Amfr,Anapc4,Ano10,Asl,Atg7,Atp8b1,Bcr,Bpnt1,Cisd2,Cog2,Ctso,Dbn1,Dnm1l,Eif4e3,Epb41,Faf2,Fah,Fam104a,Fbxl5,Fkbp9,Fth1,Fto,Gba,Gclc,Glmp,Hmgcr,Hmox1,Hnrnpd,Il6ra,Insr,Iqgap2,Jag1,Kbtbd2,Kif21b,Kpna1,Lrig1,Lrp6,Lrrk1,Ltbp1,Map3k7,Miga2,Mpv17,Myd88,Nf1,Nfe2l1,Nos2,Nr1h3,Nr2c2,Pex3,Pi4k2a,Pik3c3,Pip4k2c,Pitpna,Polb,Pparg,Pten,Ptpn11,Rab27a,Rasal3,Rdx,Rpl13a,Smarcd1,Sod2,Sr…
MP:0002591	decreased mean corpuscular volume	4.71e-05	0.00107	64	4421	Common	Abcb10,Add1,Adgrf5,Ago2,Aldh3a2,Arl6ip1,Atp6v0d1,Atp6v1b2,Bag1,Bnip3l,Bola2,Cab39l,Cp,Cpox,Crlf3,Dbn1,Ecm1,Eif2b5,Epb41,Exoc6,Fkbp10,Gba,Hmox1,Ints12,Ireb2,Itch,Jak1,Jak2,Kdm5c,Kdm6a,Mgst3,Myd88,Nckap1l,Nprl3,Nsun2,Pacsin2,Picalm,Pim1,Pld3,Plpp3,Ppp1r15a,Ppp1r15b,Prkab1,Prkag1,Rab5c,Rcc2,Rhbdf1,Rnf10,Runx1,Sept8,Setd2,Sh3pxd2a,Slc11a2,Slc15a3,Slc25a37,Slc40a1,Stat1,Steap3,Tent5c,Tfrc,Trf,Ttc7,Usp…
MP:0000788	abnormal cerebral cortex morphology	4.78e-05	0.00109	189	4421	Common	4933434E20Rik,Adgrg1,Aifm1,Ap3b1,Apaf1,Arfgef1,Arfgef2,Arhgap35,Arhgap5,Arid1b,Asns,Aspm,Atg5,Atg7,Atp7a,Atr,Atrn,Atrx,B4galt2,Basp1,Bbs2,Bbs4,Bbs7,Bdnf,Bicd2,Braf,Brpf1,Cadm1,Casp9,Ccdc88a,Cd81,Cdc42,Cdh2,Cdk5,Cdk5rap2,Cdkn1b,Cdon,Cep63,Cfl1,Chd7,Chn1,Clcn3,Cln3,Col4a1,Copb2,Ctnna1,Ctnnb1,Cxcr4,Dag1,Ddb1,Dlg3,Dyrk1a,Egfr,Ei24,Eml1,Ext1,Fbxw7,Fkrp,Fubp1,Fyn,Gba,Gclc,Gclm,Gli3,Gm2a,Gnb1,Hgsnat,Hif…
MP:0020201	abnormal granulocyte number	4.83e-05	0.00109	266	4421	Common	4933434E20Rik,Abcb1a,Acbd5,Actl6a,Adam10,Adam17,Adgre5,Akna,Ankrd27,Apc,Arhgap15,Arhgap22,Arhgap25,Arhgef5,Arid4a,Asah1,Atp11a,B4galt1,B4gat1,Bag3,Bap1,Bcl6,Bcor,Bcr,Btk,C3,C3ar1,C4b,C9orf72,Casp8,Ccl2,Ccr1,Cd34,Cd44,Cd47,Cd59a,Cdh5,Cerk,Cflar,Chst3,Ciz1,Clk1,Clpp,Cmklr1,Col4a3bp,Coro1a,Crebbp,Csf1,Csf1r,Csnk1g3,Ctnnb1,Cul4a,Cxcl12,Cxcr4,Ddrgk1,Ddx58,Dennd4c,Dhx33,Diaph1,Dido1,Dlg3,Dock2,Drosha,D…
MP:0008704	abnormal interleukin-6 secretion	5.02e-05	0.00113	101	4421	Common	Abhd16a,Acp1,Arrb2,Ash1l,Atg9a,Azi2,Cblb,Ccr5,Cd14,Cd200r1,Cd36,Cd44,Clec4d,Clic4,Cnpy3,Coro1a,Cul5,Dhx58,Dmd,Dusp1,F3,Fastk,Fos,Gnptab,Grn,Hif1a,Hmox1,Hspb1,Ifih1,Ifit2,Ifnar1,Ifngr1,Ikbkb,Il17ra,Il1r1,Il1rap,Il1rn,Il33,Il6st,Irak2,Irak3,Irak4,Irf5,Lgals3,Lgmn,Map3k7,Map3k8,Mavs,Mbtps1,Mex3c,Mmp28,Mtdh,Myd88,Nampt,Nckap1l,Ncoa3,Ndrg2,Nfkb1,Nfkbiz,Nlrc5,Nlrx1,Nod1,Nr3c1,P2rx7,Patz1,Peli1,Pik3cg,P…
MP:0000284	double outlet right ventricle	5.08e-05	0.00115	92	4421	Common	Adamts6,Ap2b1,Arid2,Baz1b,Bicc1,Bmp4,Brd2,Cc2d2a,Cep290,Cntrl,Col4a2,Col4a3bp,Cplane1,Crkl,Daam1,Dctn5,Dhrs3,Dhx35,Dnm2,Dock1,Dvl2,Ece1,Edn1,Ednra,Ermp1,Evl,Fbln1,Fgfr2,Flna,Foxp1,Gata6,Gja5,H13,Hprt,Ift74,Invs,Jarid2,Jmjd6,Lama5,Ltbp1,Luzp1,Mapk1,Mapk7,Matr3,Megf8,Mgrn1,Mkl2,Morc2a,Myh10,Nf1,Npat,Nprl3,Nxn,Pcsk5,Pcsk6,Pdgfrb,Pds5a,Pigv,Plxnd1,Pnn,Prickle1,Psen1,Pskh1,Ptk7,Ptpn11,Qrich1,Rere,Robo…
MP:0002551	abnormal blood coagulation	5.14e-05	0.00115	141	4421	Common	Abca1,Abca5,Ackr3,Adam10,Adam17,Ahr,Ano6,Anxa2,Anxa7,Ap3b1,App,Arhgef3,Bak1,Bap1,Bcl2l1,Bloc1s5,Bloc1s6,Bmpr2,C3,C4b,Capn1,Cd36,Cd47,Cdc42,Cfh,Clic1,Cryab,Ctsd,Dicer1,Dock7,E2f3,Emilin1,Emilin2,Entpd1,F3,F5,Fads2,Fbln5,Fbn1,Fbxl5,Fgl2,Flna,Fn1,Galnt1,Gas2l3,Gna13,Gnaq,Golm1,Gpx1,Gsn,Gucy1a1,Gucy1b1,Hccs,Hmox1,Hps1,Hps3,Hps4,Hps5,Inpp5d,Itgb1,Itgb3,Jup,Lcp2,Lnpk,Lyst,Map3k7,Mef2d,Mertk,Mgat2,Mgat4…
MP:0004198	abnormal fetal size	5.23e-05	0.00117	114	4421	Common	Adam17,Alkbh1,Ano6,Apc,Atmin,Baz1b,Birc6,Bmper,Brca2,Brd7,C3,Cadm1,Caprin1,Carm1,Casc3,Chd2,Cntrl,Col27a1,Creb1,Csnk1d,Cul4b,Cxcr4,Daam1,Dgat2,Dgkd,Dlg1,E2f3,E2f4,Egfr,Ehmt1,Elovl1,Eri1,Fbxw8,Fgfr2,Flnc,Fos,Fst,Fubp1,Gabpa,Ghr,Glg1,Grb10,Hgf,Hspa5,Igf2r,Ikbkap,Irs1,Itgb1,Jak1,Jmjd6,Kat2a,Kat6a,Kdm2b,Kdm6b,Kidins220,Kitl,Lama5,Lamc1,Larp7,Lgr4,Lifr,Lmnb1,Mapk6,Mcm3,Meis2,Met,Mgat2,Mgea5,Mia3,Mnt,N…
MP:0001722	pale yolk sac	5.28e-05	0.00118	57	4421	Common	Adar,Arap3,Arid1a,Atp7a,Bmpr1a,Casp8,Ccm2,Crebbp,Ctnnb1,Dlc1,Dnmt1,Egln1,Elavl1,F3,Fbxw7,Fli1,Flt4,Gata2,Gna13,Gtf2ird1,Hsd17b7,Itgb8,Jag1,Kdm6a,Krit1,Lemd2,Lemd3,Lmo2,Map2k1,Mapk14,Mapk7,Mkl2,Myh9,Myo18a,Myocd,Nampt,Nsdhl,Pak4,Paxip1,Pik3ca,Plpp3,Ptprb,Rapgef2,Rb1,Shc1,Slc25a19,Smad5,Sos1,Tead1,Tgfb1,Tgfbr2,Tmem100,Ubr4,Ubr5,Wasf2,Wnk1,Zmiz1
MP:0010418	perimembraneous ventricular septal defect	5.33e-05	0.00119	62	4421	Common	4933434E20Rik,Ackr3,Adam19,Adamts6,Adcy9,Anks6,Ap2b1,Atg16l1,Atp11a,Bmp4,Brd2,Cir1,Col4a3bp,Crebbp,Crim1,Cxcl12,Cxcr4,Dctn5,Dhx35,Dnm2,Ece1,Ednra,Ep300,Ephb4,Fbln1,Fgfr2,Fgfrl1,Gata6,H13,Hand2,Hectd1,Ltbp1,Matr3,Mkl2,Morc2a,Myh10,Npat,Nsd2,Ntf3,Nxn,Pdgfra,Pdgfrb,Pds5a,Pds5b,Prickle1,Prrc2b,Qrich1,Rere,Rpgrip1l,Sema3c,Setd5,Sh3pxd2a,Slit2,Smad6,Smarca4,Smg9,Ssr2,Tcf7l2,Tgfb2,Traf6,Zbtb14,Zmynd11
MP:0001570	abnormal circulating enzyme level	5.37e-05	0.00119	282	4421	Common	Abca6,Abcb7,Abhd5,Acaa1a,Acaca,Acad8,Ace,Acox1,Adar,Adcy3,Adcy6,Afap1l2,Agl,Akap9,Aldh2,Amfr,Anapc4,Ank,Ano10,Ap4e1,Aqp1,Arrb2,Asl,Atg7,Atp6v1h,Atp8b1,B4gat1,Bap1,Bcr,Bicd1,Boc,Bpnt1,C3,Casp8,Cd84,Cdc26,Cdipt,Cfap36,Chd9,Chn1,Cisd2,Clpp,Cluh,Cog2,Col4a1,Creb3l1,Ctdsp1,Ctso,Cybc1,Cystm1,Daam2,Dag1,Dbn1,Dclk1,Degs1,Dmd,Dnm1l,Dusp1,Dynll1,Dysf,Egr1,Eif2ak3,Eif4e3,Eif4g2,Elk4,Ell2,Epb41,Epc1,Esco1,Fa…
MP:0004703	abnormal vertebral column morphology	5.54e-05	0.00123	388	4421	Common	4933434E20Rik,Acan,Acp2,Acvr1,Adamts6,Agl,Akap9,Ank,Ankrd11,Antxr1,Ap4e1,Apaf1,Arhgap1,Arid5b,Arl6ip5,Arl8b,Arpc1b,Asxl2,Ate1,Atp2b1,Atp5b,Atp6v1d,Atp7a,Atpaf2,Atr,Atxn1,Atxn1l,Atxn7,Axin1,Bmi1,Bmp4,Bmper,Bmpr2,Bnip2,Braf,Brd2,Brd7,Btg2,Camk1,Capza2,Cask,Cbx5,Ccdc134,Ccdc77,Cdc14b,Cdk14,Cdk5rap2,Cdk7,Cdo1,Chd2,Chd7,Chrd,Chuk,Cir1,Cisd2,Clcn3,Cmip,Cnot4,Cnot6,Cnp,Cog6,Col12a1,Col1a2,Col27a1,Col4a2…
MP:0000226	abnormal mean corpuscular volume	5.68e-05	0.00126	135	4421	Common	Abcb10,Aco1,Add1,Adgrf5,Ago2,Aldh3a2,Anapc13,Appl2,Arl6ip1,Arpc4,Arrb1,Aspa,Atp6v0d1,Atp6v1b2,Bag1,Bhlhe40,Bnip3l,Bola2,Btg2,Btrc,Cab39l,Cdk5rap2,Cdk6,Chn1,Clpp,Cp,Cpox,Crlf3,Dbn1,Dcaf10,Dcaf11,Dhx36,Dkk3,Ecm1,Eif2ak1,Eif2b5,Epb41,Epc1,Exoc6,Fam53b,Fbxo7,Fkbp10,Foxo3,Gba,Gpi1,Hbs1l,Hk1,Hmox1,Ints12,Ireb2,Irf8,Itch,Itgb3,Jak1,Jak2,Kdm5c,Kdm6a,Kitl,Ldha,Lmo2,Lyst,Mast2,Mcat,Mgat2,Mgat4b,Mgst3,Myd88…
MP:0000822	abnormal brain ventricle morphology	5.86e-05	0.00129	157	4421	Common	Acvrl1,Adgra2,Aga,Akt3,Ank2,Ap4e1,Apaf1,Arfgef1,Arhgap35,Arhgap5,Asah1,Asns,Aspa,Aspm,Atf2,Atp1b2,Atp6ap1,Atxn1,Atxn1l,B4galt2,Basp1,Bbs2,Bbs4,Bbs7,Bicd2,Brd2,Cacna1c,Casp9,Ccm2,Cdc42,Cdk5rap2,Cdon,Celsr2,Cfl1,Chd7,Chn1,Clcn3,Clip2,Col4a1,Coro1c,Cp,Csf1r,Ctnna1,Ctnnb1,D430042O09Rik,Ddb1,Dlg5,Dnm1l,Dyrk1a,Ei24,Eif4h,Eml1,Fgfr2,Fgfrl1,Fig4,Fkrp,Fuz,Gja1,Gli3,Hfe,Hif1a,Hsf1,Hsf2,Htt,Ick,Ift172,Itgb1…
MP:0002746	abnormal semilunar valve morphology	6.02e-05	0.00133	60	4421	Common	4933434E20Rik,Ackr3,Adam17,Adam19,Anks6,Arid1a,Bmp4,Bmpr2,Braf,Brd2,Capza2,Cc2d2a,Cir1,Col4a2,Cplane1,Cxcr4,Cyfip2,Dctn5,Dock1,Efna1,Efnb2,Egfr,Fgfrl1,Fuz,Gja1,H13,Hectd1,Hoxa3,Hprt,Hspg2,Invs,Jag1,Klf3,Matr3,Mgp,Myh10,Nfatc1,Nos3,Ntf3,Phc1,Plce1,Prmt7,Prrc2b,Setd5,Sh3pxd2a,Shoc2,Smad6,Smarca4,Sos1,Spp1,Spry2,Ssr1,Ssr2,Tab1,Tcf7l2,Tgfb2,Trappc9,Wrn,Xpnpep1,Zfpm2
MP:0012501	abnormal pericardial cavity morphology	6.23e-05	0.00137	76	4421	Common	2700049A03Rik,Abi1,Adgrg6,Ago2,Braf,C2cd3,Casp8,Ccm2,Cdh2,Cfl1,Cflar,Commd9,Cpt2,Ctnnb1,Dicer1,Disp1,Dll4,Eng,F2r,Fbn1,Fbxl5,Fbxw7,Flrt2,Flt4,Fuz,Gab1,Gys1,Heg1,Hif1a,Hprt,Hspg2,Ift46,Itgav,Itgb8,Jag1,Jup,Kdm6a,Kif3a,Kmt2d,Lats2,Map3k7,Mapk7,Mib1,Mkl1,Mkl2,Myh10,Naca,Notch2,Nprl3,Numb,Nup133,Pdgfra,Pkn2,Por,Prmt7,Ptprj,Rb1,Rev3l,Rheb,Runx1,S1pr1,Smad2,Smo,Sox9,Ssr2,Tbx2,Tcea1,Tdg,Tgfbr1,Tgfbr2,Ub…
MP:0001688	abnormal somite development	6.25e-05	0.00137	109	4421	Common	Adam10,Aifm1,Aph1a,Bcor,Ccm2,Cdh2,Cdh5,Cfl1,Chmp5,Chrd,Ctnnb1,Cyfip1,Dact1,Daxx,Dctn1,Dhx30,Disp1,Dnmt1,Dvl2,Dzip1,Efnb2,Ehmt1,Eng,Enpp2,Ep300,F5,Fbxw7,Fgfr1,Fn1,Foxo1,Furin,G6pdx,Hand2,Hif1a,Hsd17b12,Htt,Hus1,Huwe1,Ift140,Itga5,Itgb1,Kat2a,Kat7,Kdm2b,Kdm6a,Kif3a,Kmt2b,Kmt2d,Ldb1,Lemd2,Lmo2,Lrp6,Mdm4,Med12,Mef2c,Mib1,Mthfd1,Nckap1,Ncstn,Nr2f2,Nup133,Opa1,Pak2,Paxip1,Pbx1,Pdgfra,Pik3ca,Pkn2,Plpp3,…
MP:0002424	abnormal reticulocyte morphology	6.7e-05	0.00146	63	4421	Common	Abcb10,Add1,Ago2,Atad5,Bnip3l,Cd47,Cd59a,Cdk5rap2,Chordc1,Dck,Dhx36,E2f4,Epas1,Epb41,Exoc6,Fech,Foxo3,Gpi1,Hk1,Hyal2,Ikzf1,Itga4,Itgb3,Jak2,Kdm1a,Kitl,Klf3,Lama4,Ldha,Lgmn,Lig1,Man2a1,Mcat,Mcm3,Mcm4,Mgat2,Myo1e,Nckap1l,Nfe2l2,Npm1,Pfkm,Picalm,Prdx1,Prkaa1,Prkab1,Prkag1,Prkg1,Pura,Rhbdf1,Sgpl1,Slc11a2,Slc20a1,Slc40a1,Slc7a1,Smap1,Sptlc2,Stat5b,Steap3,Tiparp,Trf,Ttc7,Ulk1,Uros
MP:0008823	abnormal interventricular septum membranous part morphology	6.7e-05	0.00146	63	4421	Common	4933434E20Rik,Ackr3,Adam19,Adamts6,Adcy9,Anks6,Ap2b1,Atg16l1,Atp11a,Bmp4,Brd2,Cir1,Col4a3bp,Crebbp,Crim1,Cxcl12,Cxcr4,Dctn5,Dhx35,Dnm2,Ece1,Ednra,Ep300,Ephb4,Fbln1,Fgfr2,Fgfrl1,Gata6,H13,Hand2,Hectd1,Ltbp1,Matr3,Mkl2,Morc2a,Myh10,Nos3,Npat,Nsd2,Ntf3,Nxn,Pdgfra,Pdgfrb,Pds5a,Pds5b,Prickle1,Prrc2b,Qrich1,Rere,Rpgrip1l,Sema3c,Setd5,Sh3pxd2a,Slit2,Smad6,Smarca4,Smg9,Ssr2,Tcf7l2,Tgfb2,Traf6,Zbtb14,Zmyn…
MP:0000813	abnormal hippocampus layer morphology	6.79e-05	0.00148	58	4421	Common	Aldh2,Arpc3,Atg7,Atrx,Bicd2,Braf,Brpf1,C1qa,Cadps,Cd81,Cdk5,Ckap5,Clcn3,Cln3,Csf1,Ctnnd1,Dag1,Dlg4,Dpysl3,Dyrk1a,Ehmt1,Ei24,Eif4ebp2,Fmr1,Fyn,Hdac2,Ireb2,Kalrn,Kif2a,Kmt2d,Lrp8,Lyst,Mecp2,Ncam1,Ndel1,Nedd9,Nsdhl,Pomt2,Ppp1r9b,Prnp,Psap,Pten,Pura,Rac1,Reln,Rnf19a,Scyl2,Spg11,Ssb,Stam,Top2b,Tsc2,Tuba1a,Usp14,Ywhae,Ywhaz,Zbtb18,Zfp521
MP:0005425	increased macrophage cell number	6.81e-05	0.00148	94	4421	Common	Adam17,Adam8,Adgrf5,Aimp1,Akr1a1,Asah1,Asl,Atg16l1,Bcl3,C1qtnf7,C4b,Ccl2,Cd200,Cd59a,Ciita,Cnot3,Ctnnb1,Ctsk,Dck,Dkk2,Dock2,Dok3,Ebf1,Egr1,Elavl1,Esr1,Farp2,Fblim1,Flt1,Fosl2,Gnptab,Hmox1,Hr,Hspg2,Ibsp,Id1,Ifih1,Ikzf1,Il6st,Inpp5d,Irak3,Irf8,Irs1,Itgb3,Klf15,Lifr,Litaf,Lrrk1,Lyn,Mitf,Ncor2,Nf1,Nfe2l2,Nfkbia,Notch2,Npc1,P2rx7,Pla2g15,Plat,Postn,Ppard,Prkdc,Pten,Ptpn2,Ptpn6,Rad50,Rbpj,Rc3h1,Rnf146,…
MP:0013664	abnormal immature B cell number	6.83e-05	0.00148	91	4421	Common	Adam10,Akap13,Arhgap17,Atm,Atmin,Bax,Bcl3,Birc3,Blnk,Bmi1,Bst1,Btk,Cd22,Cd36,Cd72,Cd74,Crebbp,Cxcr4,Cyld,Def6,Dicer1,Dll4,Dynll1,Dyrk1a,Ebf1,Ell2,Eps15,Erg,Esr1,Ezh1,Ezh2,Fas,Fli1,Fnip1,Gon4l,Grb2,Hax1,Hsd17b11,Huwe1,Ikbkb,Ikzf1,Il7r,Irf8,Kat6a,Kdelr1,Klhl6,Lama5,Lyn,Map3k14,Mcl1,Msi2,Mtor,Mtss1,Nfkb2,Nfkbia,Noc2l,Notch2,Npy1r,Pepd,Pik3r1,Plcg2,Ppp2r3c,Prkcd,Prkdc,Ptpn2,Ptpn22,Ptpn6,Ptprc,Rad50,R…
MP:0002703	abnormal renal tubule morphology	6.89e-05	0.00149	137	4421	Common	Ace,Acp2,Aga,Ahi1,Alms1,Ampd2,Ap3b1,Arhgap35,Arl3,Atg5,Atp6ap2,Atp7a,Atr,Bag6,Bbs4,Bcr,Bloc1s5,Cc2d2a,Cd1d1,Cdc42,Cep290,Col4a1,Cplane1,Crim1,Ctbs,Ctdnep1,Ctnnb1,Ctnnd1,Dab2,Dapk1,Dchs1,Dcn,Ddr1,Dicer1,Dkc1,Dlg5,Ercc1,Exoc5,Fah,Fam20a,Fan1,Fat4,Fgfr2,Flcn,Fryl,Gadd45a,Gcnt2,Glis2,Gne,Golm1,Gsk3b,Gstz1,Gusb,Hexb,Hgsnat,Hmox1,Hp,Hspa5,Ift88,Invs,Itga3,Itgb1,Kif3a,Kirrel,Lama5,Lamb2,Ldb1,Lgmn,Lgr4,L…
MP:0008438	abnormal cutaneous collagen fibril morphology	6.98e-05	0.0015	18	4421	Common	Adamts2,Atp7a,Bgn,Col3a1,Col5a2,Dcn,Dpt,Dse,Fbn1,Lox,Mia3,Ogn,P3h3,P3h4,Plod1,Ppib,Thbs2,Tnxb
MP:0003720	abnormal neural tube closure	7.03e-05	0.00151	163	4421	Common	Abi1,Adar,Ago2,Alkbh1,Ambra1,Apaf1,Arhgap35,Arid1a,Arih2,Arl13b,Atmin,Atp2c1,Axin1,Bcl10,Brca2,Brd1,Brd2,Casp9,Cc2d2a,Cfl1,Coq6,Cox4i1,Cpox,Crebbp,Crybg1,Csk,Cyfip1,Dact1,Ddx3x,Dicer1,Dlc1,Dnmt1,Dvl2,Egr1,Ehmt1,Ehmt2,Emg1,Enpp2,Ep300,Eprs,F2r,Fbxl5,Fbxw7,Fdft1,Fgfr1,Fuz,Gatad2a,Gja1,Gli3,Glrx3,Hif1a,Hus1,Ift122,Ift140,Ift172,Ift46,Ift88,Ikbkap,Itgb1,Itpk1,Itpr1,Jarid2,Kat2a,Kdm2a,Kdm2b,Kdm6a,Kif3…
MP:0002970	abnormal white adipose tissue morphology	7.13e-05	0.00153	167	4421	Common	Acacb,Acot13,Adcy3,Adipoq,Aebp1,Alms1,Angptl2,Ankrd26,Ap1s2,Arhgap1,Arhgap5,Arhgef11,Arid5b,Arrdc3,Ash1l,Ate1,Atf3,Atm,Atr,B4galt1,Bag3,Bbs4,Braf,Bscl2,C1qtnf1,C3,Cav1,Cbl,Ccdc3,Ccny,Cdc73,Cdk7,Cdkal1,Cdkn1a,Cdkn1b,Ces1d,Chd2,Cidea,Cisd2,Cnot3,Col5a3,Crebbp,Crtc3,Cspg4,Cxcr4,Dgat2,Dhcr24,Dnajc15,Dock7,E2f3,Ebf1,Efemp1,Ehmt1,Eif4ebp1,Eprs,Ercc1,Esr1,Fabp5,Fbn1,Fmo5,Fto,Gabbr1,Ghr,Gk5,Gpd2,Grb10,Gu…
MP:0013152	abnormal organ/body region tumor incidence	7.26e-05	0.00155	229	4421	Common	Acox1,Acvr1,Ahr,Amfr,Anxa7,Apc,Arid4a,Atad5,Atf2,Atm,Atp2a2,Atp2c1,Bad,Bap1,Becn1,Bin1,Blnk,Braf,Brca2,Cat,Cav1,Cbx7,Ccdc80,Ccndbp1,Ccng1,Cd34,Cdc37,Cdc73,Cdk11b,Cdk5rap2,Cdkn1a,Cdkn1b,Cdkn2c,Cers2,Chd2,Chfr,Chordc1,Chuk,Cop1,Crebbp,Ctnnb1,Cul9,Cyld,Dclre1a,Ddx58,Dicer1,Dkc1,Dok1,Dok3,Eef1a1,Egr1,Eif4e,Elavl1,Erbb2,Errfi1,Esr1,Ets2,Etv6,Ext1,Ezh2,F3,Fah,Fbxo4,Fbxw7,Fgfr2,Flcn,Fli1,Foxo3,Fyn,Ggta1…
MP:0004957	abnormal blastocyst morphology	7.39e-05	0.00157	117	4421	Common	Aatf,Abcb7,Actr3,Ahctf1,Alkbh1,Arnt,Arpc3,Atp6v0c,Atrx,Bptf,Brd4,Bub3,C3,Cdk12,Chd4,Chd8,Chm,Cnot3,Cops2,Cops3,Cops5,Csnk2b,Cstf2,Ctcf,Ctnna1,Ctnnb1,Cul3,Cul4b,Cul7,Cxxc1,Dad1,Ddx3x,Dhx9,Dnm1l,Egfr,Egln1,Ehmt2,Elavl1,Emg1,Enpp2,Ets2,Fbxl5,Fgfr1,Fgfr2,Gab1,Gnl3,Hgf,Hspa5,Il11ra1,Incenp,Itgb1,Itgb3,Itgb7,Kdm6a,Lamb1,Map2k1,Mapk1,Mapk14,Mbtps1,Med1,Med28,Met,Mfn2,Mga,Mnat1,Mtor,Nbn,Ncoa6,Ndel1,Nf2,N…
MP:0014137	abnormal preimplantation embryo morphology	7.39e-05	0.00157	117	4421	Common	Aatf,Abcb7,Actr3,Ahctf1,Alkbh1,Arnt,Arpc3,Atp6v0c,Atrx,Bptf,Brd4,Bub3,C3,Cdk12,Chd4,Chd8,Chm,Cnot3,Cops2,Cops3,Cops5,Csnk2b,Cstf2,Ctcf,Ctnna1,Ctnnb1,Cul3,Cul4b,Cul7,Cxxc1,Dad1,Ddx3x,Dhx9,Dnm1l,Egfr,Egln1,Ehmt2,Elavl1,Emg1,Enpp2,Ets2,Fbxl5,Fgfr1,Fgfr2,Gab1,Gnl3,Hgf,Hspa5,Il11ra1,Incenp,Itgb1,Itgb3,Itgb7,Kdm6a,Lamb1,Map2k1,Mapk1,Mapk14,Mbtps1,Med1,Med28,Met,Mfn2,Mga,Mnat1,Mtor,Nbn,Ncoa6,Ndel1,Nf2,N…
MP:0001780	decreased brown adipose tissue amount	7.47e-05	0.00158	28	4421	Common	Adam12,Arid5b,Bscl2,Cbl,Cd36,Cebpb,Eprs,Fabp3,Kmt2d,Lipa,Lnpep,Lrp1,Mark2,Mark3,Mlxipl,Ncoa3,Nipbl,Pds5a,Pds5b,Pnn,Pparg,Prkg1,Ptpn11,Rptor,Sik3,Srsf3,Stag1,Zdhhc13
MP:0012763	abnormal alpha-beta T cell number	7.55e-05	0.0016	304	4421	Common	4933434E20Rik,Acp2,Acsl3,Adam10,Adpgk,Akap9,Aldh2,Anpep,Ap1g1,Ap4e1,Apc,Arap2,Arhgef1,Arhgef6,Arid1b,Arid5a,Aspm,Atg3,Atg5,Atm,Atp11a,Atp13a2,Atp5f1,B2m,Bap1,Bcl3,Bcl6,Bclaf1,Becn1,Bhlhe40,Blnk,Bnip2,Btk,Cadm1,Casc4,Casp8,Ccdc127,Ccl2,Ccr1,Ccr5,Cd1d1,Cd22,Cd274,Cd48,Cd59a,Cd74,Cd83,Cd84,Cd86,Cdk6,Cdkal1,Cflar,Chd2,Chd4,Chd9,Ciita,Clpp,Cnot4,Cog6,Coro1a,Crebbp,Csk,Ctcf,Ctr9,Ctsl,Cxcl16,Cxcr4,Cyld,…
MP:0003632	abnormal nervous system morphology	7.59e-05	0.0016	1199	4421	Common	2610301B20Rik,2700049A03Rik,4933434E20Rik,Aars,Abca1,Abcb1a,Abcd1,Abhd12,Abi1,Acan,Acot7,Acp2,Acvr1,Acvr1b,Acvrl1,Adam10,Adam17,Adar,Adarb1,Adcy3,Adcy9,Add1,Adgra2,Adgrg1,Adgrg6,Adipor2,Adk,Aff1,Aga,Aggf1,Ago2,Agtpbp1,Ahi1,Aif1,Aifm1,Akap12,Akap13,Akt3,Alcam,Aldh2,Alkbh1,Alms1,Als2,Ambra1,Angptl4,Ank2,Ank3,Anxa1,Ap1g1,Ap1s2,Ap3b1,Ap3m2,Ap4e1,Apaf1,Apc,Aph1a,App,Arap3,Arcn1,Arfgef1,Arfgef2,Arhgap3…
MP:0005280	abnormal fatty acid level	7.64e-05	0.00161	149	4421	Common	Abcd1,Abhd5,Acaca,Acacb,Acadl,Acot13,Acot7,Acss1,Adipoq,Aldh2,Ank2,Ankrd26,Apc,Blvra,Bscl2,C1qtnf1,C3,Cav1,Cavin1,Cbl,Cc2d1b,Ccar2,Ccdc80,Ccl2,Ccny,Cd36,Cebpb,Ces1d,Chn1,Chuk,Cidea,Cpt1a,Crat,Crbn,Crebbp,Crtc3,Cyp27a1,Cyp4v3,Dap,Dclk1,Dgat2,Dip2b,Dixdc1,Dnajc15,Dpy19l3,Dusp1,Eci1,Ecscr,Ehmt1,Fabp3,Fabp4,Fads2,Fads3,Faf2,Fat1,Foxo1,Fto,Gab1,Gfm1,Ghr,Gk,Gpam,Hadh,Hadha,Hmgcr,Hmox1,Hsd17b4,Ift80,Il4…
MP:0002200	abnormal brain ventricular system morphology	7.79e-05	0.00164	188	4421	Common	Acvrl1,Add1,Adgra2,Aga,Akt3,Ank2,Ap4e1,Apaf1,Arfgef1,Arhgap35,Arhgap5,Arid1b,Asah1,Asns,Aspa,Aspm,Atf2,Atp1b2,Atp6ap1,Atxn1,Atxn1l,B4galt2,B4gat1,Basp1,Bbs2,Bbs4,Bbs7,Bicd2,Brd2,Cacna1c,Casp3,Casp9,Cc2d2a,Ccm2,Cdc42,Cdk5rap2,Cdon,Celsr2,Cep290,Cfl1,Chd7,Chn1,Clcn3,Clip2,Col4a1,Coro1c,Cp,Csf1r,Ctnna1,Ctnnb1,D430042O09Rik,Ddb1,Dlg5,Dnm1l,Dnm2,Dyrk1a,Ei24,Eif4h,Eml1,Fgfr2,Fgfrl1,Fig4,Fkrp,Fuz,Gja1,G…
MP:0010274	increased organ/body region tumor incidence	7.84e-05	0.00164	226	4421	Common	Acox1,Acvr1,Ahr,Amfr,Anxa7,Apc,Arid4a,Atad5,Atf2,Atm,Atp2a2,Atp2c1,Bad,Bap1,Becn1,Bin1,Blnk,Braf,Brca2,Cat,Cav1,Cbx7,Ccdc80,Ccndbp1,Ccng1,Cd34,Cdc37,Cdc73,Cdk11b,Cdk5rap2,Cdkn1a,Cdkn1b,Cdkn2c,Cers2,Chd2,Chfr,Chordc1,Chuk,Cop1,Crebbp,Ctnnb1,Cul9,Cyld,Dclre1a,Ddx58,Dicer1,Dkc1,Dok1,Dok3,Eef1a1,Egr1,Eif4e,Elavl1,Erbb2,Errfi1,Esr1,Ets2,Etv6,Ext1,Ezh2,F3,Fah,Fbxo4,Fbxw7,Fgfr2,Flcn,Fli1,Foxo3,Fyn,Gnai2…
MP:0004891	abnormal adiponectin level	8.05e-05	0.00168	49	4421	Common	Adipoq,Adipor2,Atm,Brd2,Bscl2,Cav1,Ccl2,Cd36,Cdh13,Ces1d,Crebbp,Dok1,Fam213a,Fosl2,Fto,Ghr,Igf1r,Ikbke,Kbtbd2,Lipe,Lmna,Lnpep,Lrp6,Mapk8,Mark2,Mark3,Ncoa3,Ncor2,Nos2,Nos3,Pde3b,Pla2g16,Plscr3,Pparg,Prdx3,Ptpn1,Ptpn11,Ptpn2,Rictor,Rptor,Sik2,Sik3,Ssfa2,Stat3,Tbc1d4,Tlr4,Tnks,Ucp2,Zeb1
MP:0002459	abnormal B cell physiology	8.24e-05	0.00172	316	4421	Common	Abcb1a,Adcy9,Akap13,Arhgdib,Arhgef1,Arhgef6,Ash1l,Atf3,Atm,Atmin,B2m,B3gnt5,Bad,Bax,Bbs4,Bbx,Bcl10,Bcl2l1,Bcl3,Bcl6,Bhlhe40,Birc3,Blnk,Bmi1,Bst1,Btk,C3ar1,Cabin1,Casp2,Casp8,Ccl2,Ccnd3,Ccr1,Ccr5,Cd180,Cd1d1,Cd22,Cd274,Cd36,Cd37,Cd53,Cd59a,Cd72,Cd74,Cd81,Cd83,Cd84,Cd86,Cdkn1a,Cebpb,Chuk,Ciita,Clec4d,Ctnnbl1,Ctss,Cxcl12,Cxcr4,Cyld,Dapp1,Dbnl,Dck,Def6,Dhrs4,Diaph1,Dicer1,Dkk3,Dock10,Dock2,Dock8,Dok1…
MP:0000292	distended pericardium	8.27e-05	0.00172	38	4421	Common	Adam10,Aph1a,Cdh2,Cdh5,Cflar,Ctbp2,Disp1,Efnb2,F2r,F3,Fn1,Foxo1,Gtf2i,Gtf2ird1,Hand2,Ift88,Ikbkap,Jag1,Jarid2,Kif3a,Lmo2,Map2k5,Mapk7,Mib1,Ncstn,Nf1,Paxip1,Ppp3r1,Ptprj,Raf1,Rasa1,Smad1,Smo,Sos1,Srf,Tmod1,Ubp1,Wnk1
MP:0003828	pulmonary edema	8.5e-05	0.00176	32	4421	Common	Adipoq,Ahr,Asah1,Atp2a2,Bag3,Bloc1s6,Cav1,Cd14,Chd2,Dusp1,E2f3,Epha3,Erg,Il17ra,Inpp5d,Jup,Lmna,Med1,Nos3,Ntf3,Pak1,Pecam1,Ppp3ca,Prdx6,Pten,Ptger4,Sirt1,Tie1,Timp3,Tlr4,Vegfa,Zfand5
MP:0001076	abnormal hypoglossal nerve morphology	8.52e-05	0.00176	36	4421	Common	4933434E20Rik,Adarb1,Arhgap35,Atg16l1,Brd2,Capza2,Cdk5,Cir1,Cln8,Cmip,Cog6,Crim1,Ctnnb1,Dbn1,Dhx35,Erbb2,Fut8,Gja1,H13,Hmgxb3,Kif1bp,Morc2a,Nsun2,Polb,Prmt7,Prrc2b,Rpgrip1l,Setd5,Sh3pxd2a,Slc20a2,Smg9,Ssr2,Traf6,Unk,Xpnpep1,Zmynd11
MP:0008219	abnormal dorsal telencephalic commissure morphology	8.83e-05	0.00182	78	4421	Common	Akt3,Ank2,Ap4e1,App,Arfgef1,Arhgap35,Arhgap5,Arid1b,Atr,Bicd2,Bmi1,Brpf1,Canx,Casp9,Cd81,Chd7,Clip2,Csf1r,Ctnnb1,Dclk1,Efnb1,Eif4h,Enah,Ext1,Fgfr1,Fgfr2,Fyn,Galc,Gli3,Hfe,Hsf1,Hspa5,Ireb2,Itpr3,Itsn1,Kif3a,Map1b,Map2k4,Map3k12,March7,Marcks,Marcksl1,Mbp,Mycbp2,Napa,Ndst1,Nfia,Nfib,Nfix,Nipbl,Nos2,Npc1,Nrp1,Ntn1,Pdha1,Pfdn1,Plaa,Prnp,Ptbp2,Pten,Rab18,Rac1,Robo1,Rpgrip1l,Slc12a6,Slc17a5,Slc33a1,Sma…
MP:0003566	abnormal cell adhesion	8.86e-05	0.00182	47	4421	Common	Adipoq,Cln3,Coro2b,Coro7,Ctnna1,Ctnnd1,Daam1,Dlc1,Dnm1l,Fermt2,Flnb,Fndc3b,Itga11,Itga8,Itgam,Itgb1,Itgb3,Mfge8,Mkl2,Mtss1,Myh11,Myh9,Myo1f,Pak4,Palld,Podxl,Pomt2,Por,Postn,Ppp5c,Prkci,Ptpra,Rac1,Rapgef1,Rapgef2,Rapgef6,Sdc4,Shc1,Slit2,Ston1,Tgm2,Tjp1,Tns1,Vcl,Vegfa,Vezt,Zyx
MP:0011380	enlarged brain ventricles	9.07e-05	0.00186	93	4421	Common	Adgra2,Aga,Ank2,Ap4e1,Arfgef1,Asns,Aspa,Aspm,Atf2,Atp1b2,Atp6ap1,Atxn1l,B4galt2,Basp1,Bbs2,Bbs4,Bbs7,Bicd2,Brd2,Cacna1c,Cdc42,Cdk5rap2,Cdon,Cfl1,Chn1,Clcn3,Col4a1,Csf1r,D430042O09Rik,Ddb1,Dnm1l,Ei24,Eif4h,Eml1,Fgfr2,Fgfrl1,Fig4,Gja1,Hfe,Hif1a,Hsf2,Htt,Ift172,Itgb8,Kidins220,Kif2a,Lbr,Luzp1,Lztfl1,Magi2,Map1b,Marcksl1,Morc2a,Mycbp2,Myh10,Myo9a,Nfib,Nfix,Nrd1,Patz1,Pcnt,Pdcd6ip,Phgdh,Podxl,Prickle1…
MP:0008079	decreased CD8-positive, alpha-beta T cell number	9.37e-05	0.00192	144	4421	Common	Acp2,Adam10,Aldh2,Arhgef6,Aspm,Atg3,Atg5,Atm,Atp5f1,B2m,Bclaf1,Becn1,Bnip2,Cadm1,Casc4,Casp8,Ccr1,Cd274,Cdk6,Clpp,Cog6,Coro1a,Csk,Ctcf,Ctr9,Cyld,Dennd1b,Dennd4c,Diaph1,Dicer1,Dll4,Dnmt3a,Dock2,Dock8,Drosha,Elavl1,Elk4,Esr1,Ets1,Fam234b,Fam96a,Fas,Fbxo7,Fcrls,Foxo1,Foxp1,Gmds,Grb2,Grk6,H13,H2-Ab1,Hax1,Hbs1l,Hivep2,Hnrnpl,Id2,Id3,Idh1,Ifnar1,Ifngr1,Ikbkb,Il7r,Irak1,Irf1,Irf5,Itgal,Kdelr1,Kdm7a,Lbr,…
MP:0001589	abnormal mean corpuscular hemoglobin	9.49e-05	0.00194	106	4421	Common	Aco1,Acsf2,Add1,Adgrf5,Ago2,Agpat1,Ap4e1,Apbb2,Arhgap25,Arpc2,Arrb1,Atg16l1,Atp6v1b2,Bhlhe40,Btg2,Cdk5rap2,Cfh,Chn1,Chsy1,Clpp,Copg1,Cp,Dcaf10,Dkk3,Dlg5,Eif2ak1,Eif2b2,Elmo1,Epb41,Eps15,Exoc6,Ezh2,Fam53b,Fbxo7,Foxo3,G6pdx,Gpi1,Hbs1l,Hk1,Ireb2,Irf8,Itch,Itgb3,Kdm5c,Kitl,Klf9,Laptm5,Lgmn,Lmnb1,Lpar6,Lrpprc,Lsm11,Ltbp1,Mgat4b,Mtor,Myl12b,Myo1c,Nprl3,Nptn,Nsun2,Pacsin2,Pex3,Picalm,Pik3cb,Pld3,Pnpt1,P…
MP:0001700	abnormal embryo turning	9.49e-05	0.00194	106	4421	Common	Alg5,Ankrd11,Apc,Arnt,Axin1,Bcor,Bicral,Cdh2,Cdh5,Chd7,Commd1,Coq6,Csk,Dad1,Dap3,Ddx3x,Dhx30,Disp1,Dkc1,Dlg3,Dnmt1,Dph3,Enpp2,Ep300,Exoc4,Flt1,Fn1,Furin,G6pdx,Gatad2a,Hus1,Huwe1,Ift122,Ift88,Ikbkap,Invs,Itga5,Kat7,Kdm2a,Kdm6a,Kif3a,Kif5b,Kmt2b,Krit1,Lmo2,Mbd4,Megf8,Mpi,Mthfd1l,Mtor,Nckap1,Nphp3,Nr2f2,Numb,Opa1,Otud5,Paxip1,Pdgfra,Pibf1,Pkd2,Pkn2,Plpp3,Pnpla6,Poglut1,Prkar1a,Procr,Psmd4,Pten,Ptk2,…
MP:0000801	abnormal temporal lobe morphology	9.63e-05	0.00196	179	4421	Common	Abcb1a,Agtpbp1,Akt3,Aldh2,Ank3,Ap3m2,App,Arfgef1,Arid1b,Arpc3,Atg5,Atg7,Atp7a,Atrx,Bad,Basp1,Bbs2,Bbs4,Bbs7,Bdnf,Bicd2,Bid,Bmi1,Braf,Brpf1,Btg1,C1qa,C3,Cadm1,Cadps,Cav1,Ccdc88a,Cd81,Cdk5,Cdk5rap2,Cdkn1b,Cers2,Chd7,Chmp2b,Ckap5,Ckb,Clcn3,Cln3,Col4a1,Csf1,Cspg4,Cst3,Ctnnb1,Ctnnd1,Ctsd,Cxcr4,D430042O09Rik,Dag1,Dbn1,Dlg4,Dpysl3,Dyrk1a,Ehmt1,Ei24,Eif4ebp2,Eno2,Fkrp,Fmr1,Fyn,Gak,Gba,Gdi1,Gja1,Gli3,Gm2a…
MP:0002444	abnormal T cell physiology	9.64e-05	0.00196	325	4421	Common	Acaca,Ahnak,Apc,Appl1,Arhgef1,Arhgef12,Arhgef5,Arhgef6,Atf3,Atg3,Atg5,Atm,B2m,Bad,Bcl10,Bcl2l1,Bcl3,Bcl6,Bclaf1,Becn1,Bhlhe40,Birc2,Birc3,Birc6,Braf,Brca2,C3ar1,Cacnb3,Cadm1,Caml,Casp8,Casp9,Cbl,Cblb,Cbx5,Ccl2,Ccnd3,Ccr5,Cd1d1,Cd22,Cd274,Cd276,Cd2ap,Cd44,Cd48,Cd59a,Cd74,Cd81,Cd83,Cd84,Cd86,Cdk6,Cdkn1a,Cdkn1b,Cdkn2c,Cebpb,Cflar,Chd4,Chst3,Ciita,Clec4d,Clpp,Cops5,Cops6,Cops8,Coro1a,Ctsc,Ctss,Dbnl,D…
MP:0010288	increased gland tumor incidence	9.76e-05	0.00198	103	4421	Common	Apc,Atad5,Atm,Bap1,Becn1,Bin1,Braf,Brca2,Cav1,Ccdc80,Cdc37,Cdc73,Cdk5rap2,Cdkn1a,Cdkn1b,Cdkn2c,Chd2,Cop1,Crebbp,Ctnnb1,Cul9,Dclre1a,Dkc1,Egr1,Erbb2,Esr1,Ets2,Etv6,Fbxo4,Fbxw7,Foxo3,Gon4l,Gpx7,Hace1,Hgf,Hip1,Hmgn1,Htatip2,Id1,Ikzf1,Kitl,Ldah,Map3k8,Mcm4,Mcm9,Met,Mlh1,Mnt,Msh2,Mtf1,Nabp2,Nbn,Ndrg1,Ndrg2,Nf1,Nf2,Notch3,Notch4,Nsmce2,Pcsk6,Per2,Pik3ca,Pim1,Pms2,Ppard,Prdx1,Prkar1a,Prkdc,Pten,Ptgs2,Pt…
MP:0009676	abnormal hemostasis	9.93e-05	0.00201	141	4421	Common	Abca1,Abca5,Ackr3,Adam10,Adam17,Ahr,Ano6,Anxa2,Anxa7,Ap3b1,App,Arhgef3,Bak1,Bap1,Bcl2l1,Bloc1s5,Bloc1s6,Bmpr2,C3,C4b,Capn1,Cd36,Cd47,Cdc42,Cfh,Clic1,Cryab,Ctsd,Dicer1,Dock7,E2f3,Emilin1,Emilin2,Entpd1,F3,F5,Fads2,Fbln5,Fbn1,Fbxl5,Fgl2,Flna,Fn1,Galnt1,Gas2l3,Gna13,Gnaq,Golm1,Gpx1,Gsn,Gucy1a1,Gucy1b1,Hccs,Hmox1,Hps1,Hps3,Hps4,Hps5,Inpp5d,Itgb1,Itgb3,Jup,Lcp2,Lnpk,Lyst,Map3k7,Mef2d,Mertk,Mgat2,Mgat4…
MP:0000240	extramedullary hematopoiesis	0.000102	0.00205	76	4421	Common	Adam17,Ahr,Arhgef1,Arid4a,B4galt1,Bap1,Bcl2l1,Braf,Cbl,Cebpb,Chd2,Clec4d,Crebbp,Csf1,Csnk1a1,Dck,Ddx58,Diaph1,Dicer1,Dkc1,Egln1,Eif2ak1,Ep300,Epb41,Erap1,Fam20c,Fbxo4,Gba,Git2,Hmox1,Idh1,Ikzf1,Il10rb,Itgb3,Itpa,Jak2,Kdm6a,Kitl,Lgmn,Lyn,Mcat,Nckap1l,Ncor2,Ndfip1,Neu1,Nfkb1,Nfkb2,Nfkbia,Npm1,Pgm3,Phc1,Pparg,Prdx1,Prkab1,Prkag1,Procr,Pten,Ptpn11,Ptprc,Rbl1,Rbm15,Sh2b3,Slc11a2,Slc29a3,Sos1,Spi1,Steap…
MP:0005620	abnormal muscle contractility	0.000104	0.0021	218	4421	Common	Aars,Abcb8,Abcc9,Abhd5,Acadvl,Acta2,Adam17,Adcy6,Adipoq,Adm,Aifm1,Akap12,Akap13,Anxa6,Ap4e1,Appl1,Arhgap42,Arhgef1,Arhgef12,Arrb1,Ate1,Atg5,Atp1a1,Atp1a2,Atp1b1,Atp2a2,Atp2b1,Atp2b4,Atp6ap2,Bag3,Bcar1,Bmpr1a,Bmpr2,Bnip3l,Braf,Cacna1c,Cacna2d1,Camk2d,Cap2,Capn1,Capns1,Cast,Cav1,Cavin1,Cdc42,Cdh2,Cisd2,Clcn3,Clip3,Clu,Cnot1,Cnot3,Col3a1,Col4a3bp,Col6a1,Col6a3,Crem,Cryab,Ctsl,Cul3,Dag1,Ddah1,Ddr2,De…
MP:0011203	abnormal parietal yolk sac morphology	0.000105	0.00212	82	4421	Common	Abcb7,Abi1,Alkbh1,Arnt,Atrx,Bptf,Cdk12,Chm,Col4a1,Cops2,Csnk2b,Ctcf,Ctdnep1,Cul3,Cul4b,Cul7,Cxxc1,Dad1,Dag1,Ddx3x,Dhx9,Dnm1l,Egfr,Egln1,Ehmt2,Elavl1,Enpp2,Ets2,Fbxl5,Fgfr2,Gab1,Gnl3,Hgf,Htt,Il11ra1,Itgb3,Itgb7,Kdm6a,Lamb1,Map2k1,Mapk1,Mapk14,Med1,Mesd,Met,Mfn2,Mga,Mtor,Nbn,Ncoa6,Nf2,Nr2f2,Pbrm1,Pikfyve,Pmm2,Pnpla6,Pofut2,Pomt1,Pomt2,Pparg,Ppp1r8,Ptpn11,Rangap1,Rptor,Rybp,Senp2,Slc31a1,Smad2,Smad4…
MP:0008556	abnormal tumor necrosis factor secretion	0.000106	0.00213	117	4421	Common	Abhd16a,Arrb2,Ash1l,Azi2,B2m,Birc3,Cblb,Ccar2,Ccr1,Cd14,Cd1d1,Cd200r1,Cd274,Cd36,Cd44,Clec4d,Clic4,Cnpy3,Coro1a,Cul5,Dhx58,Dlg1,Dmd,Dusp1,Fads1,Fastk,Fos,Fyn,Gnai2,Gpr65,Grn,H2-Ab1,Hcfc2,Hif1a,Hmox1,Hsf1,Ier3,Ifit2,Ifnar1,Ifngr1,Ifngr2,Il1r1,Irak2,Irak3,Irak4,Irf5,Itgax,Lgals3,Lgals3bp,Lgmn,Map3k7,Map3k8,Mapkapk2,March1,Mavs,Mertk,Mgat5,Mmp28,Mtor,Myd88,Myo1g,Nckap1l,Ncoa3,Nfatc2,Nfe2l2,Nfil3,Nfk…
MP:0013500	abnormal fibroblast apoptosis	0.000113	0.00226	41	4421	Common	Apaf1,Arhgap1,Atr,Babam2,Birc6,Btrc,Casp3,Casp7,Ccdc47,Ccdc80,Cdc73,Cflar,Csnk1a1,Cul3,Dap3,Dcaf1,Dkc1,Eloa,Gnl3,Gpx7,Hdac3,Ikbkb,Ing1,Lum,Mapk7,Mapkap1,Ncoa6,Nfe2l2,Npm1,Pdgfrb,Pik3ca,Ptrh2,Rad54l2,Raf1,Rb1cc1,Sh3glb1,Sod1,Taf4,Tnip1,Trp53,Usp22
MP:0005266	abnormal metabolism	0.000114	0.00227	345	4421	Common	Abca1,Abcb7,Abhd12,Abhd16a,Abhd5,Acaca,Acadl,Acadvl,Ace,Acot13,Acss1,Acvrl1,Adam8,Adcy5,Adh1,Adh5,Adk,Agl,Ahr,Aifm1,Akr1a1,Aldh2,Aldh3a2,Angptl4,Ap3b1,Arhgap1,Arrdc3,Asah1,Asl,Atad5,Ate1,Atf3,Atm,Atmin,Atox1,Atp6v1h,Atp7a,Atr,B4galt1,Babam2,Baz1b,Bckdk,Bcl3,Bid,Brca2,Brd2,Bscl2,Cacna1c,Camkk2,Cap2,Casp8,Cat,Cav1,Cav2,Cavin1,Cbl,Ccng1,Ccs,Cd163,Cd36,Cdc14b,Cdkn1a,Cdkn1b,Cebpb,Cep290,Cep63,Chd2,Chm…
MP:0005015	increased T cell number	0.000115	0.00229	256	4421	Common	Ace,Acsl3,Adpgk,Akap9,Anpep,Ap4e1,Apc,Arap2,Arhgef1,Arid4a,Arid5a,Arid5b,Atm,Atp11a,B2m,Bap1,Bax,Bcl10,Bcl2l1,Bcl3,Bhlhe40,Birc3,Blnk,Bnip2,Btk,Cadm1,Casp8,Ccdc127,Ccl2,Ccnd3,Ccr5,Cd22,Cd274,Cd48,Cd59a,Cd74,Cd86,Cdk6,Cdkn1a,Cdkn1b,Cdkn2c,Cds2,Cflar,Chd2,Chd4,Ciita,Clpp,Cnot4,Cog6,Coro1a,Crebbp,Csf1,Ctcf,Ctsl,Cxcr4,Cyld,Cystm1,Dap,Dck,Ddhd1,Ddx58,Def6,Dennd1b,Dgka,Diaph1,Dicer1,Dnajc11,Dock10,Dock…
MP:0003202	abnormal neuron apoptosis	0.000117	0.00233	132	4421	Common	Aifm1,Akt3,Apaf1,App,Arfgef1,Arhgap1,Atg7,Atp7a,Atr,Bag6,Bax,Bcl2l1,Bdnf,Braf,Btg1,Caprin1,Cask,Casp2,Casp3,Casp9,Cast,Ccl2,Cdk5rap2,Copb2,Coq9,Cx3cl1,Cx3cr1,Dapk1,Ddb1,Dnm1l,Dusp1,Ei24,Eml1,Eno2,F2r,Fas,Fn1,Gclm,Gpx1,Grn,Hax1,Hif1a,Hipk2,Hnrnpab,Htra2,Hyou1,Igf1,Ikbkap,Jun,Kdm2a,Kidins220,Lancl1,Lbr,Maged1,Magoh,Maob,Map3k12,Mapk8ip1,Mbp,Mcph1,Med1,Mfn2,Mocs2,Mpp5,Ncstn,Ndfip1,Ndrg2,Nos3,Notch2,…
MP:0003705	abnormal hypodermis morphology	0.000122	0.00242	80	4421	Common	Acacb,Angptl2,Ap1s2,Arhgap1,Arhgap5,Atf3,Atm,Atr,B4galt1,Bag3,Bscl2,C1qtnf1,Cav1,Ccdc3,Cdc73,Cdk7,Cdkal1,Chd2,Cisd2,Cnot3,Col5a2,Col5a3,Cxcr4,Dgat2,Dhcr24,Dse,Ebf1,Efemp1,Efnb2,Ercc1,Fabp5,Fbn1,Fgfr2,Fmo5,Gabbr1,Ghr,Hr,Hsd11b1,Lbr,Lipa,Lipe,Lmna,Lztfl1,Mapk8,Mbd5,Mcat,Mcoln1,Memo1,Mmp14,Mpv17,Npy1r,Odc1,Osmr,Pdgfrb,Phf2,Plin2,Ppard,Pparg,Ppp6c,Psmb10,Ptpn11,Samd4,Serpine1,Sh3kbp1,Sh3pxd2b,Sik3,Sm…
MP:0005014	increased B cell number	0.000125	0.00246	155	4421	Common	2310022B05Rik,Acp2,Adam10,Adpgk,Akap13,Ano10,Arhgap17,Arhgap22,Arhgef1,Atm,Atp11a,Bax,Bcl3,Bclaf1,Birc3,Blnk,Bst1,Btk,Casp8,Ccdc127,Cd22,Cd36,Cd72,Cd74,Cdkn1a,Cdkn2c,Clec4d,Clpp,Cog6,Crls1,Cxcr4,Cyld,Def6,Dll4,Dock2,Ebf1,Elf4,Elk4,Ell2,Ep300,Eps15,Esr1,Ets1,Ezh2,Fas,Fbn1,Fcgr2b,Fli1,Gdi2,Gmds,Grb2,H2-Ab1,Hax1,Hmox1,Hsd17b11,Id3,Ifih1,Ifnar1,Ifngr1,Ikbkb,Ikzf1,Il6st,Il7r,Irf8,Itgb2,Jak1,Kdelr1,Kdm…
MP:0005006	abnormal osteoblast physiology	0.000128	0.00251	37	4421	Common	Adipoq,Akr1a1,Ank,Ano6,Cebpb,Col12a1,Crtap,Csf1,Ctsk,Eif2ak3,Enpp1,Fgfr2,Fosl2,Gja1,Gsk3b,Hivep3,Igf1r,Il6st,Irs1,Khdrbs1,Kitl,Mgp,Nos3,Nov,Npy1r,Nr3c1,Plekho1,Pth1r,Rps6ka3,Slc39a13,Slc39a14,Smad4,Smurf1,Sost,Spp1,Suco,Tmco1
MP:0009858	abnormal cellular extravasation	0.000128	0.00251	37	4421	Common	Adam17,Anxa8,Arhgap25,B4gat1,Ccr1,Ccr5,Cd44,Cd99l2,Cdh5,Cttn,Cytip,Dock8,Edil3,Esam,F3,Fas,Galnt1,Gcnt1,Glg1,Gnai2,Icam1,Itga4,Itgal,Itgam,Itgb7,Jam3,Lrch1,Ndst1,Nos3,Nrros,Selp,Slc35c1,St3gal4,St3gal6,Tlr2,Vegfa,Vim
MP:0000286	abnormal mitral valve morphology	0.000132	0.00258	29	4421	Common	Adam17,Adam19,Bmpr1a,Braf,Crebbp,Cxcr4,Cyr61,Dchs1,Dock1,Efna1,Efnb2,Ehmt1,Fbn1,Flna,Gja5,Hprt,Megf8,Nf1,Nfatc1,Ntf3,Pdlim7,Ptpn11,Sap130,Sh3pxd2b,Smad6,Sox9,Tgfb2,Tns1,Xpnpep1
MP:0003279	aneurysm	0.000132	0.00258	29	4421	Common	Adam19,Atp7a,Fat1,Fbn1,Fli1,Gja1,Hspg2,Jup,Klf15,Lamc1,Lox,Micu2,Mkl2,Nos3,Notch2,Nphp3,Ntf3,Parva,Pdgfb,Pdgfrb,Pomgnt1,Runx1,Sgcb,Tgfb2,Tgfbr1,Tgfbr2,Timp1,Timp3,Tspan12
MP:0013501	increased fibroblast apoptosis	0.000132	0.00258	29	4421	Common	Arhgap1,Atr,Babam2,Birc6,Btrc,Ccdc47,Cdc73,Cflar,Csnk1a1,Cul3,Dcaf1,Dkc1,Eloa,Gnl3,Gpx7,Hdac3,Ikbkb,Ing1,Mapk7,Mapkap1,Ncoa6,Nfe2l2,Npm1,Rad54l2,Raf1,Rb1cc1,Sod1,Tnip1,Usp22
MP:0008073	abnormal CD4-positive, alpha beta T cell number	0.000134	0.00261	227	4421	Common	4933434E20Rik,Acp2,Acsl3,Adam10,Akap9,Aldh2,Anpep,Ap1g1,Arap2,Arhgef1,Arhgef6,Arid5a,Atg3,Atg5,Atm,B2m,Bap1,Bcl3,Bcl6,Becn1,Bhlhe40,Blnk,Bnip2,Btk,Cadm1,Casp8,Ccdc127,Ccl2,Ccr1,Cd22,Cd274,Cd48,Cd59a,Cd74,Cd83,Cd84,Cd86,Cdk6,Cdkal1,Cflar,Chd2,Chd9,Ciita,Clpp,Cnot4,Cog6,Coro1a,Crebbp,Ctcf,Ctsl,Cxcr4,Cyld,Dap,Dck,Dctn1,Ddah1,Ddhd1,Def6,Dennd1b,Denr,Diaph1,Dicer1,Dll4,Dnajc11,Dock2,Dock8,Elavl1,Elk4,…
MP:0004857	abnormal heart weight	0.000136	0.00265	164	4421	Common	Abcb8,Abcc9,Abhd5,Acadvl,Ace,Acsl4,Acsl5,Adam17,Ahr,Akap6,Ankrd26,Ap4e1,Arid1b,Ate1,Atg5,Atp1a2,Atp1b1,Atp2a2,Atp6ap2,Bag3,Bbx,Cacna1c,Cacnb3,Capn1,Cavin1,Ccnd2,Ccnd3,Cdkn1b,Cenpf,Cisd2,Clcn3,Cnot3,Ctsl,Dbn1,Dcbld2,Ddr2,Des,Dusp6,Dyrk1a,Egln1,Eif2b5,Emd,Epas1,Esr1,F2r,Fabp3,Fstl1,Fxyd1,Gas2l3,Ghr,Gla,Gnaq,Gpi1,Grb14,Gys1,Hdac3,Herc4,Hif1a,Hmox1,Hprt,Igf1r,Igf2r,Igfbp2,Ino80,Itch,Itgb3,Jup,Kcnmb1,…
MP:0005022	abnormal immature B cell morphology	0.000138	0.00267	93	4421	Common	Adam10,Akap13,Arhgap17,Atm,Atmin,Bax,Bcl3,Birc3,Blnk,Bmi1,Bst1,Btk,Cd22,Cd36,Cd72,Cd74,Crebbp,Cxcr4,Cyld,Def6,Dicer1,Dll4,Dynll1,Dyrk1a,Ebf1,Ell2,Ep300,Eps15,Erg,Esr1,Ezh1,Ezh2,Fas,Fli1,Fnip1,Gon4l,Grb2,Hax1,Hsd17b11,Huwe1,Ikbkb,Ikzf1,Il7r,Irf8,Kat6a,Kdelr1,Klhl6,Lama5,Lyn,Map3k14,Mcl1,Msi2,Mtor,Mtss1,Nfkb2,Nfkbia,Noc2l,Notch2,Npy1r,Pepd,Pik3r1,Plcg2,Ppp2r3c,Prkcd,Prkdc,Ptpn2,Ptpn22,Ptpn6,Ptprc,R…
MP:0008077	abnormal CD8-positive, alpha-beta T cell number	0.000138	0.00267	197	4421	Common	Acp2,Adam10,Akap9,Aldh2,Arhgef1,Arhgef6,Aspm,Atg3,Atg5,Atm,Atp5f1,B2m,Bcl3,Bclaf1,Becn1,Bhlhe40,Blnk,Bnip2,Cadm1,Casc4,Casp8,Ccdc127,Ccr1,Cd22,Cd274,Cd74,Cd86,Cdk6,Cflar,Chd4,Ciita,Clpp,Cog6,Coro1a,Crebbp,Csk,Ctcf,Ctr9,Ctsl,Cxcr4,Cyld,Dck,Dennd1b,Dennd4c,Diaph1,Dicer1,Dll4,Dnajc11,Dnmt3a,Dock2,Dock8,Drosha,Elavl1,Elk4,Esr1,Ets1,Fam234b,Fam96a,Fas,Fbxo7,Fcrls,Foxo1,Foxp1,Foxp2,Gmds,Grb2,Grk6,H13,H…
MP:0000333	decreased bone marrow cell number	0.000139	0.00268	75	4421	Common	Abcc10,Actl6a,Adar,Arhgap1,Arid5b,Atg7,Atr,Bcl6,Bmi1,Braf,Brca2,Ccnd3,Csf1,Csnk1a1,Ctnnb1,Cul4a,Cxcl12,Cxcr4,Dkc1,Dst,Ebf1,Elavl1,Ep400,Ezh1,Fbxw7,Fubp1,Gab2,Gja1,Hax1,Hip1,Id1,Idh1,Ifngr1,Ikzf1,Il7r,Inpp5d,Jak2,Kat6a,Kdm1a,Kitl,Kmt2a,Meis1,Msi2,Nlk,Pbx1,Pcid2,Pfdn1,Pgm3,Phf20,Picalm,Pparg,Prkdc,Procr,Pten,Ptpn11,Ptpn2,Rad50,Rassf2,Rc3h1,Rhbdf1,Rnf2,Rpl27a,Ruvbl1,Slc37a4,Sod2,Spi1,Sptlc2,Thoc5,Ti…
MP:0005010	abnormal CD8-positive, alpha beta T cell morphology	0.000147	0.00283	211	4421	Common	Abcb1a,Acp2,Adam10,Akap9,Aldh2,Arhgef1,Arhgef6,Aspm,Atg3,Atg5,Atm,Atp5f1,B2m,Bcl3,Bclaf1,Becn1,Bhlhe40,Blnk,Bnip2,Cadm1,Casc4,Casp8,Ccdc127,Ccr1,Ccr5,Cd22,Cd274,Cd44,Cd74,Cd86,Cdk6,Cflar,Chd4,Ciita,Clpp,Cog6,Coro1a,Crebbp,Csk,Ctcf,Ctr9,Ctsl,Cxcr4,Cyld,Cytip,Dck,Dennd1b,Dennd4c,Diaph1,Dicer1,Dll4,Dnajc11,Dnajc15,Dnmt3a,Dock2,Dock8,Drosha,Ebag9,Elavl1,Elk4,Esr1,Ets1,Fam234b,Fam96a,Fas,Fbxo7,Fcrls,F…
MP:0002145	abnormal T cell differentiation	0.000149	0.00286	194	4421	Common	Adam10,Aff1,Apc,Arid5b,Atm,Bad,Bcl10,Bcl2l1,Bcl6,Bhlhe40,Bmi1,C3ar1,Cadm1,Carm1,Cbl,Cbx4,Ccnd3,Cd1d1,Cd274,Cd59a,Cd74,Cd83,Cdk6,Chd4,Ciita,Cops5,Crebbp,Csk,Ctcf,Ctsd,Cux1,Cxcr4,Cyld,Dck,Dicer1,Dll4,Dnajc11,Dock2,Drosha,Dyrk1a,E2f4,Eef1a1,Elavl1,Elf4,Elk4,Ep300,Esr1,Ets1,Ezh2,Fas,Fbxw7,Fos,Foxo1,Fyn,Gadd45g,Gba,Grb2,H2-Ab1,H2-DMa,Hax1,Hif1a,Hivep3,Hnrnpl,Hnrnpll,Htra2,Id3,Ifngr2,Igbp1,Ikbkb,Ikzf1,…
MP:0001541	abnormal osteoclast physiology	0.000156	0.00299	49	4421	Common	Akr1a1,Atp6v1h,Bmpr1a,Casp3,Cd68,Cebpb,Cry2,Ctsk,Ctsl,Esr1,Farp2,Fblim1,Fosl2,Galc,Gnptab,Gsn,Hivep3,Igf1r,Il6st,Inpp5d,Irak3,Irs1,Itgb3,Limd1,Lrrk1,Mitf,Mmp14,Nbr1,Nos2,Nos3,Nov,Plekhm1,Ptger4,Ptpn2,Ptprc,Sh3bp2,Snx10,Spp1,Sqstm1,Suco,Thra,Thrb,Tlr2,Tnfrsf11b,Tob2,Traf6,Tyrobp,Was,Wdr1
MP:0002026	increased leukemia incidence	0.000158	0.00301	42	4421	Common	Arid4a,Atm,Bap1,Blnk,Braf,Chordc1,Crebbp,Ddx58,Dicer1,Eef1a1,Etv6,Ezh2,Fli1,Gpx7,Hmga1,Hr,Ikzf1,Irf8,Kitl,Kmt2a,Lmo2,Mcm4,Nabp2,Ncstn,Nf1,Notch3,Npm1,Nras,Nrbp1,Pml,Pten,Ptpn11,Rad50,Rbm15,Runx1,Samd9l,Smap1,Soat1,Spi1,Tet2,Tgfbr2,Trp53
MP:0002747	abnormal aortic valve morphology	0.000158	0.00301	42	4421	Common	4933434E20Rik,Ackr3,Adam17,Adam19,Anks6,Arid1a,Brd2,Capza2,Col4a2,Cxcr4,Cyfip2,Dctn5,Efna1,Efnb2,Egfr,Gja1,Hoxa3,Hprt,Hspg2,Invs,Jag1,Klf3,Matr3,Mgp,Myh10,Nfatc1,Nos3,Ntf3,Phc1,Plce1,Prmt7,Setd5,Sh3pxd2a,Smarca4,Sos1,Spp1,Spry2,Tab1,Tgfb2,Wrn,Xpnpep1,Zfpm2
MP:0010429	abnormal heart left ventricle outflow tract morphology	0.000158	0.00301	42	4421	Common	4933434E20Rik,Ackr3,Adam17,Adam19,Anks6,Arid1a,Brd2,Capza2,Col4a2,Cxcr4,Cyfip2,Dctn5,Efna1,Efnb2,Egfr,Gja1,Hoxa3,Hprt,Hspg2,Invs,Jag1,Klf3,Matr3,Mgp,Myh10,Nfatc1,Nos3,Ntf3,Phc1,Plce1,Prmt7,Setd5,Sh3pxd2a,Smarca4,Sos1,Spp1,Spry2,Tab1,Tgfb2,Wrn,Xpnpep1,Zfpm2
MP:0002463	abnormal neutrophil physiology	0.00016	0.00303	91	4421	Common	Alox5ap,Arhgap15,Arhgap25,Arhgef1,B4galt1,Bcr,Btk,C3ar1,C5ar1,Capg,Cav1,Ccl2,Ccr1,Cd14,Cd44,Cd47,Chuk,Clcn3,Cmklr1,Ctsc,Cttn,Dock2,Edil3,Entpd1,Fastk,Flot1,G6pc3,Git2,Gja1,Gnai2,Gsn,Hck,Hspb1,Hvcn1,Icam1,Ikbkb,Il17ra,Il1r1,Inpp5d,Itgal,Itgam,Itgb2,Jagn1,Jam3,Jdp2,Kmt2e,Lcp1,Lgals3,Mcl1,Mcoln2,Mmp28,Mpp1,Myd88,Myo1f,Ncf4,Nckap1l,Nfe2l2,Nlrx1,Nos3,Npr1,Pdcd10,Pde4b,Pde4d,Pik3cg,Pik3r5,Plau,Plaur,Pl…
MP:0013503	abnormal embryonic tissue cell apoptosis	0.00016	0.00303	91	4421	Common	Adar,Ahctf1,Aifm1,Becn1,Bmp4,Bmpr1a,Brd2,Cdk11b,Cdk7,Chd8,Chordc1,Clpp,Cnbp,Cops5,Ctcf,Ctnnb1,Cul4b,Dab2,Dad1,Daxx,Ddx3x,Dhx9,Dido1,Dnmt1,Efnb2,Eloa,Eya1,Fbxl5,G6pdx,Gata6,Gclc,Hand2,Hif1a,Hspa5,Htt,Hus1,Kat2a,Kat7,Kat8,Kdm2a,Kdm2b,Lemd3,Mapk14,Mdm4,Meis2,Mga,Mpi,Nabp2,Nbn,Ncapg2,Notch2,Npm1,Odc1,Osr1,Paxip1,Pkn2,Polb,Prickle1,Prpf19,Rac1,Raf1,Rest,Rev3l,Rheb,Rnaseh1,Slk,Smarca5,Smarcb1,Smg1,Smo,…
MP:0002092	abnormal eye morphology	0.000163	0.00308	670	4421	Common	2610301B20Rik,2900026A02Rik,4932438A13Rik,4933434E20Rik,Abca1,Abca5,Abcd1,Acbd3,Acsl5,Acvr2a,Adam15,Adam17,Adam9,Adamts9,Adamtsl4,Adcy9,Adgrf5,Adk,Adsl,Aff1,Agap1,Agl,Agps,Agtpbp1,Ahcyl1,Ahi1,Ahr,Ahsa2,Aif1,Aifm1,Akap10,Aktip,Alcam,Aldh16a1,Aldh1a3,Alkbh1,Alms1,Angpt2,Angptl4,Ank2,Ankrd11,Ankrd27,Anpep,Anxa3,Anxa6,Ap1g1,Ap3b1,Ap4e1,Apaf1,Apc,Arhgap25,Arhgap35,Arhgef11,Arhgef15,Arid1a,Arl3,Arl6ip1…
MP:0010080	abnormal hepatocyte physiology	0.000163	0.00308	76	4421	Common	Adamts7,Adar,Aldh2,Atg7,C3,Cav1,Ccdc134,Ccndbp1,Ccr5,Cdk2,Cdkn1a,Ces1d,Clock,Cul4a,Eif6,Ercc1,Ern1,Fah,Fas,Glmp,Grn,Hdac3,Hgf,Hif1a,Hmgcl,Hs2st1,Ifngr1,Igf1r,Ikbkb,Il6ra,Iqgap2,Jun,Klf15,Lamp2,Map2k4,Map3k7,Meis2,Met,Ncoa5,Ncoa6,Ndst1,Nfe2l2,Picalm,Plau,Polb,Prkab1,Pten,Ptpn11,Rad50,Rb1cc1,Rbck1,Sav1,Sbds,Sec61a1,Sel1l,Selenop,Slc20a1,Slc39a14,Smarcb1,Sod2,Sptbn1,Srsf3,Stat1,Stat3,Sumf1,Tcf7l2,Tg…
MP:0005438	abnormal glycogen homeostasis	0.000165	0.00311	82	4421	Common	Abcg2,Acacb,Acadvl,Agl,Blvra,Cav1,Cd36,Cebpb,Crebbp,Crtc2,Dgat2,Dnajb9,Dnajc15,Eif2ak3,Fabp3,Fnip1,Foxo1,Fstl1,Gab1,Gak,Gbe1,Grb10,Gsk3a,Gsk3b,Gys1,H6pd,Hccs,Hdac3,Hif1a,Hmgb1,Hsd11b1,Il6ra,Il6st,Inppl1,Insr,Klf15,Lamp2,Lifr,Lipe,Lmna,Lpin1,Map3k7,Mark3,Mcat,Mlxipl,Mtor,Ncoa3,Ncor1,Nos2,Npy1r,Nuak1,Osmr,Pcca,Pdk4,Pfkfb3,Pfkm,Phka1,Pik3c3,Pik3cb,Pik3r4,Pitpna,Pla2g16,Plau,Ppard,Ppp1r3c,Prkab2,Prka…
MP:0011086	postnatal lethality, incomplete penetrance	0.000167	0.00314	340	4421	Common	Abca1,Acadm,Ace,Ackr3,Adam12,Adam17,Adam19,Adamts1,Adcy3,Aff1,Ahi1,Ahr,Akap6,Akna,Apaf1,Apc,Araf,Arih2,Asxl2,Atf2,Atox1,Atp7a,Atrx,Atxn1l,B4galt1,Bace1,Basp1,Bcl6,Bdnf,Bicd2,Bmi1,Bmp4,Braf,Brca2,Brd2,Brd4,Brpf1,Bscl2,Canx,Cap2,Capn5,Carm1,Casp8,Casp9,Cbx3,Cdc42,Cdk4,Cdo1,Cdon,Cebpb,Cfl1,Cfl2,Chd2,Chd7,Cic,Cnpy3,Col3a1,Col4a1,Col5a2,Cpeb2,Cpeb4,Crebbp,Crkl,Csf1,Ctcf,Ctsl,Cux1,Dicer1,Dlg4,Dmtf1,Dna…
MP:0002640	reticulocytosis	0.000178	0.00334	52	4421	Common	Abcb10,Add1,Ago2,Atad5,Bnip3l,Cd47,Cd59a,Chordc1,Dck,Dhx36,E2f4,Epb41,Exoc6,Fech,Foxo3,Gpi1,Hk1,Hyal2,Itgb3,Jak2,Kitl,Klf3,Lama4,Ldha,Lgmn,Lig1,Man2a1,Mcat,Mcm4,Mgat2,Myo1e,Nckap1l,Nfe2l2,Pfkm,Picalm,Prdx1,Prkaa1,Prkab1,Prkag1,Prkg1,Rhbdf1,Sgpl1,Slc11a2,Slc20a1,Slc40a1,Smap1,Stat5b,Steap3,Tiparp,Ttc7,Ulk1,Uros
MP:0011496	abnormal head size	0.000186	0.00347	71	4421	Common	Acvrl1,Adgra2,Apaf1,Arhgef2,Arid1a,Aspa,Aspm,Atr,Bcor,Bnc2,Cask,Cdk5rap2,Cep63,Chrd,Csk,Ctnna1,Ctnnb1,Dag1,Dctn5,Ddx3x,Depdc5,Dyrk1a,Eng,Evc2,Eya1,Foxn3,Gja1,Huwe1,Itgav,Lama5,Lias,Lig3,Lmnb1,Map3k3,Map3k7,Marcks,Mcph1,Med1,Mthfd1l,Nf1,Nfix,Nipbl,Nxn,Otulin,Pcnt,Pdcd10,Pds5b,Pex2,Phgdh,Prickle1,Prrx1,Pten,Ptpn11,Ptprj,Rbm8a,Ryk,Slc25a19,Smad2,Smarca1,Smarca4,Smoc1,Smurf2,Ssbp3,Tcf4,Tcof1,Tgif1,Tm…
MP:0001176	abnormal lung development	0.000188	0.00352	86	4421	Common	Abca3,Adam17,Bag6,Bclaf1,Bmper,Creb1,Ctgf,Ctnnb1,Cux1,Cyld,Dicer1,Egfr,Elavl1,Ep300,Epas1,Errfi1,Fam20b,Fbln1,Fbn1,Fbxw7,Fgfr2,Foxp2,Fstl1,Fubp1,Gak,Git1,Hat1,Hikeshi,Hsd11b1,Ift88,Igf2r,Itga3,Itga8,Jmjd6,Kdm6b,Lama5,Lamc1,Lmnb1,Lox,Lyst,Man1a2,Mapk14,Mapk6,Met,Mmp14,Mmp2,Nabp2,Nfib,Nisch,Nr3c1,Nubp1,Ola1,Pcyt1a,Pdgfa,Pdgfra,Pecam1,Pkd2,Pkdcc,Pten,Ptk2,Ptk7,Rc3h1,Rc3h2,Rdh10,Robo1,Safb,Sav1,Selen…
MP:0002188	small heart	0.000192	0.00358	109	4421	Common	Aars,Acacb,Ace,Acsl4,Acvrl1,Adm,Ap4e1,Arid1b,Bbx,Bmpr1a,Calcrl,Cdc73,Cdkn1b,Cenpf,Cisd2,Commd9,Ctnnb1,Cyp51,Ddr2,Dyrk1a,Eif2b5,Eloa,Ephb4,Esr1,Fgfr1,Fgfr2,Fxr1,Gab1,Ghr,Gja1,Hectd3,Herc4,Hspb7,Htra2,Huwe1,Igfbp2,Itch,Itpa,Kdm1a,Kdm2a,Kdm4a,Kdm6a,Knop1,Lats2,Lmna,Map3k7,Mapk6,Mapk7,Mbtd1,Med1,Med24,Mef2c,Mib1,Mtmr12,Myh10,Myo10,Naca,Ncoa6,Ncstn,Nf1,Notch2,Nprl3,Nr1h3,Nr3c2,Pard3,Pbrm1,Peli1,Pik3ca…
MP:0008174	decreased follicular B cell number	0.000193	0.00359	45	4421	Common	Arhgef1,Bcl10,Bcl3,Birc3,Blnk,Btk,Cd72,Dock10,Fli1,Grb2,Huwe1,Igbp1,Ikbkb,Irf8,Kdelr1,Klhl6,Kmt2d,Lyn,Map3k14,Mtor,Nfkb2,Nfkbia,Notch2,Pcid2,Pgm3,Pik3ap1,Plcg2,Ppp2r3c,Ptpn2,Ptpn22,Ptpn6,Ptprc,Rras2,Sgpl1,Sh3kbp1,Siglec1,Slc25a28,Spen,Sppl2a,Tle4,Tlr8,Tnfsf13b,Was,Wipf1,Zbtb1
MP:0010119	abnormal bone mineral density	0.000193	0.00358	216	4421	Common	Acp2,Acsl5,Adam8,Adgrd1,Adgrf5,Adipoq,Aktip,Aldh2,Ank,Ankrd11,Anxa1,Ap4e1,Arhgap1,Aspa,Atp11a,Atp2b1,Atxn10,Babam2,Bbx,Bhlhe40,Bmp3,Boc,Brpf1,Bzw2,Casp3,Cast,Cd14,Cd68,Cdc26,Cdo1,Chd2,Chn1,Chsy1,Cisd2,Clpp,Cnot3,Col14a1,Col1a2,Creb3l1,Csf1r,Ctgf,Ctns,Ctsk,Cul7,Ddhd1,Ddx10,Def6,Degs1,Dkk2,Dolk,Dopey2,Ebf2,Efemp1,Egr1,Eif4g2,Elk4,Enpp1,Ercc1,Esr1,Eya3,F2r,Fam20c,Fblim1,Fbn1,Fermt2,Fgfr2,Flnb,Fosl2,…
MP:0003223	decreased cardiomyocyte apoptosis	0.000194	0.00359	13	4421	Common	Acp1,Bach1,Bnip3,Bnip3l,Egln1,Map2k1,Mapk8,Mapk9,Mapkapk2,Mcu,Nox4,Ptpn11,Tcap
MP:0002672	abnormal pharyngeal arch artery morphology	0.000196	0.00362	36	4421	Common	Acvr1,Acvrl1,Arid1a,Bmp4,Ccm2,Chd7,Chrd,Ece1,Edn1,Ednra,Efnb2,Foxo1,Hand2,Hdac7,Hif1a,Kat6a,Kat7,Krit1,Ltbp1,Map3k7,Mef2c,Mkl2,Nrp1,Plxnd1,Prrc2b,Rdh10,Rpgrip1l,Sh3pxd2a,Smad7,Smg9,Smo,Tbx2,Tgfbr2,Traf6,Vegfa,Zmiz1
MP:0004882	enlarged lung	0.000196	0.00362	36	4421	Common	Adgrf5,Atg5,Atp7a,Capns1,Dennd1b,Dicer1,Fosl2,Fstl1,Gnaq,Gpi1,Grb10,Hck,Hif1a,Hspb8,Igf2r,Itga3,Kifap3,Klf3,Ldha,Mapk14,Mark2,Nek6,Nfe2l2,Nfib,Npc1,Npc2,Nr3c1,Pdgfra,Pik3cb,Pten,Ptger4,Ptpn11,Spp1,Tlr4,Tpm1,Wwtr1
MP:0000929	open neural tube	0.000201	0.0037	106	4421	Common	Abi1,Ago2,Ambra1,Apaf1,Arhgap35,Arid1a,Arl13b,Atmin,Atp2c1,Bcl10,Brca2,Brd1,Brd2,Cfl1,Cpox,Crebbp,Csk,Cyfip1,Dact1,Dicer1,Dlc1,Dnmt1,Dvl2,Ehmt1,Ehmt2,Emg1,Enpp2,Ep300,F2r,Fbxl5,Fbxw7,Fgfr1,Glrx3,Hif1a,Ift122,Ift140,Ift172,Ift88,Itgb1,Itpk1,Kat2a,Kdm2b,Kdm6a,Kif3a,Kitl,Kmt2b,Larp7,Lasp1,Lemd2,Lias,Lmo4,Lrp6,Map3k4,Map3k7,Marcks,Marcksl1,Mbd4,Med12,Med24,Mthfd1,Mthfd1l,Nckap1,Numb,Pak2,Palld,Pdgfc,…
MP:0009920	abnormal transitional stage T2 B cell morphology	0.000203	0.00372	19	4421	Common	Adam10,Akap13,Bcl3,Cd22,Ell2,Grb2,Hax1,Kdelr1,Lama5,Map3k14,Nfkb2,Nfkbia,Notch2,Pepd,Plcg2,Sh3kbp1,Sppl2a,Tnfsf13b,Zfp318
MP:0010602	abnormal pulmonary valve cusp morphology	0.000203	0.00372	19	4421	Common	4933434E20Rik,Adam17,Adam19,Braf,Capza2,Cir1,H13,Hoxa3,Matr3,Nfatc1,Ntf3,Prrc2b,Sh3pxd2a,Smarca4,Ssr2,Tcf7l2,Tgfb2,Trappc9,Wrn
MP:0010899	abnormal pulmonary alveolar system morphology	0.000205	0.00375	131	4421	Common	Abca1,Abca3,Adamts2,Adgrf5,Aff4,Aimp1,Ap3b1,Asah1,Atp7a,Atxn1l,B4galt1,Bid,Bloc1s6,Bmper,Bmpr1a,Bmpr2,Cav1,Cav2,Cdo1,Cebpg,Cic,Cmklr1,Col27a1,Crebbp,Ctgf,Ctsa,Ctsk,Cux1,Dbnl,Dkc1,Dusp1,Egfr,Epas1,Errfi1,Fam20a,Fbln1,Fbln5,Fbn1,Fbxw7,Fgfr2,Flna,Foxp2,Fstl1,Fubp1,Fut8,Gak,Grb10,Hat1,Hck,Hif1a,Hikeshi,Hps1,Hsd11b1,Hspa5,Igf1,Igf1r,Inpp5d,Itga3,Jun,Kdm6b,Kmt5b,Lama5,Lipa,Lmnb1,Lox,Loxl1,Loxl3,Lpl,Lrr…
MP:0013258	abnormal extracellular matrix morphology	0.000206	0.00377	34	4421	Common	Adm,Ahi1,Antxr1,B4gat1,Bicd2,Cav2,Col4a1,Crim1,Dag1,Fkbp10,Flnb,Fn1,Hspg2,Itga6,Itgb1,Itgb8,Kdr,Lama2,Lama4,Lama5,Lamc1,Mmp14,Myo7a,Nid1,P4ha1,Pdgfrb,Pomgnt1,Pomgnt2,Pomt2,Pxdn,Reck,Ric8a,Setd7,Slc31a1
MP:0000364	abnormal vascular regression	0.000213	0.00388	28	4421	Common	Ahr,Angpt2,Arhgef15,Arnt,Ate1,Cacna1c,Ctnnb1,Dll4,Ednra,Flna,Hif1a,Itga5,Jag1,Map3k7,Matr3,Mib1,Myh11,Myocd,Numb,Pcsk5,Ptger4,Ptgs2,Ptk2,Ptprb,Rbpj,Slco2a1,Smarca4,Vegfa
MP:0001407	short stride length	0.000214	0.00388	43	4421	Common	Aga,Arsa,Atg5,Atm,Atp13a2,Bckdk,Cav1,Ciz1,Cln3,Ctsf,Dctn1,Ddhd2,Dmd,Epb41l3,Fxr1,Fzd4,Glrb,Hip1,Hipk2,Hmbs,Hsd17b4,Htt,Ids,Kcnma1,Lrrk2,Mcoln1,Mecp2,Park7,Plcb4,Ppard,Psap,Qk,Rnd3,Selenop,Slc17a5,Slc7a5,Smad2,Sncg,Spast,Tbp,Tpp1,Vps13a,Wdr81
MP:0008026	abnormal brain white matter morphology	0.000214	0.00388	117	4421	Common	4933434E20Rik,Akt3,Ank2,Ap3b1,Ap4e1,App,Arfgef1,Arhgap35,Arhgap5,Arid1b,Arsa,Aspa,Atr,Atrn,Bicd2,Bmi1,Brpf1,Cacnb3,Canx,Casp9,Cav1,Cd81,Cers2,Chd7,Clip2,Csf1r,Ctnnb1,Dbn1,Dclk1,Dhx35,Dnm1l,Ebf1,Efnb1,Efnb2,Ei24,Eif2b4,Eif2b5,Eif4h,Enah,Ext1,Fgfr1,Fgfr2,Fyn,Galc,Gli3,Gnptab,H13,Hfe,Hsf1,Hspa5,Htt,Ireb2,Itpr3,Itsn1,Kif1b,Kif1bp,Kif3a,Klc1,Map1b,Map2k4,Map3k12,March7,Marcks,Marcksl1,Mbp,Morc2a,Mycbp…
MP:0010038	abnormal placenta physiology	0.000215	0.00388	87	4421	Common	Abca1,Abi1,Adm,Arnt,Ash1l,Chm,Chmp5,Chordc1,Cops5,Ctbp2,Cul7,Cyr61,Dad1,Dap3,Ddx3x,Dph3,Enpp2,Ern1,F2r,Fgfr2,Fkbp4,Fn1,Furin,Grb2,Gtf2i,Gtf2ird1,Hus1,Ikbkap,Il11ra1,Itga4,Itgb1,Itgb8,Kat7,Kdr,Krit1,Ldb1,Mapk1,Mapk14,Mecp2,Med1,Met,Mib1,Mpi,Nckap1,Ncoa1,Ncoa2,Ncoa6,Npm1,Nr2f2,Paxip1,Pdgfra,Plk2,Plpp3,Pnpla6,Ppard,Pparg,Pten,Ptgs2,Ptk2,Raf1,Rb1,Setd2,Slc2a3,Slc43a2,Slk,Smad1,Smad2,Smad5,Src,Ss18,Ss…
MP:0000460	mandible hypoplasia	0.000216	0.00388	30	4421	Common	Acvr1,Acvr2a,Baz1b,Bmp4,Braf,Cplane1,Crkl,Dlg1,Edn1,Ednra,Egfr,Eya1,Fgfrl1,Foxn3,Fuz,Hand2,Itgb1,Lmna,Mapk1,Nabp2,Nipbl,Prdm16,Prrx1,Rpgrip1l,Sc5d,Smad2,Srf,Tcof1,Tmem67,Zeb1
MP:0003227	abnormal vascular branching morphogenesis	0.000216	0.00388	30	4421	Common	Adam10,Adgra2,Aph1a,Arap3,Bmpr1a,Ccm2,Crebbp,Dll4,Ephb4,Ephx2,Itgb8,Jag1,Mapk7,Meis1,Myh9,Myo10,Nos3,Nrp1,Pdcd10,Ptk2,Ptpn12,Ptprj,Runx1,S1pr1,Tek,Tie1,Timp3,Vegfa,Wnk1,Zmiz1
MP:0003992	increased mortality induced by ionizing radiation	0.000216	0.00388	30	4421	Common	Atm,Bid,Brca2,Ccng1,Cops6,Erc1,Hmgn1,Ing1,Kcnj8,Kitl,Kmt2a,Kmt2e,Mcph1,Mdc1,Mdm4,Mre11a,Nabp2,Nbn,Nos2,Parg,Parp1,Parp2,Per2,Prkdc,Rassf1,Rpl27a,Trp53,Trp53bp1,Uimc1,Usp1
MP:0002723	abnormal immune serum protein physiology	0.000217	0.00388	518	4421	Common	Abcb1a,Abhd16a,Ace,Acp1,Adam17,Adar,Adcy9,Ahnak,Ahr,Akap13,Anxa5,Apc,Arhgef1,Arhgef2,Arhgef5,Arhgef6,Arid5a,Arrb2,Asah1,Ash1l,Atf2,Atf3,Atg16l1,Atg9a,Atm,Atmin,Azi2,B2m,B3gnt5,B4galt1,Bax,Bbs4,Bbx,Bcl10,Bcl2l1,Bcl3,Bcl6,Bhlhe40,Birc2,Birc3,Blnk,Bmi1,Brd2,Bst1,Btk,C3,C3ar1,C5ar1,Cabin1,Cacnb3,Cadm1,Casp4,Casp8,Cav1,Cblb,Ccar2,Ccl2,Ccr1,Ccr5,Cd14,Cd163,Cd180,Cd1d1,Cd200,Cd200r1,Cd22,Cd274,Cd276,Cd3…
MP:0011094	embryonic lethality before implantation, complete penetrance	0.000218	0.00391	84	4421	Common	Aatf,Actr3,Ap1g1,Ap2m1,Arfgef2,Arpc3,Atp6v0c,B3gnt5,Capn2,Capn5,Casp8ap2,Ccnk,Cdc73,Cdk11b,Cdk8,Chchd3,Chd4,Ctnna1,Cttn,Ddx20,Dmap1,Eif3b,Eif6,Emg1,Exoc1,Fbl,G2e3,Gli3,Gnl3,Hnrnpl,Hsbp1,Ints1,Itgb1,Kmt2a,Kmt5a,Lims1,Mapk8ip1,Nasp,Nepro,Nup214,Odf2,Pcna,Pcyt1a,Pes1,Pikfyve,Plrg1,Pnn,Polr1b,Pomt2,Ppm1b,Prkra,Prpf19,Psmc3,Psmc4,Rbbp8,Rbm19,Rpa1,Rps19,Rrm1,Ruvbl1,Sec24d,Skil,Smarca4,Snap23,Snrnp200,S…
MP:0000920	abnormal myelination	0.000223	0.00399	107	4421	Common	Abcd1,Adgrg6,Arsa,Aspa,Atrn,Bace1,C3ar1,Cadm3,Canx,Cd300lf,Cd36,Cd59a,Cd86,Cemip,Cisd2,Cln6,Cln8,Cnp,Coq9,Cp,Csf1r,Cx3cr1,Cyth1,Cyth2,Dag1,Dlg1,Dock8,Dst,Eif2b5,Epb41l3,Erbb2,Erbin,Ezh2,Fas,Fdft1,Fgd4,Fig4,Fyn,Gabbr1,Galc,Gars,Gnpat,Gnptab,H2-D1,Hsd17b4,Hspg2,Htt,Ifngr1,Igf1,Igf1r,Il6st,Itga6,Itgav,Itgb1,Lama2,Lama4,Lamc1,Large1,Litaf,Lmna,Lmnb1,Lpin1,Map1b,Mbp,Mmp12,Mnat1,Mtmr2,Mtor,Ncstn,Ndrg1,…
MP:0009926	decreased transitional stage T2 B cell number	0.000235	0.00417	16	4421	Common	Adam10,Akap13,Bcl3,Cd22,Ell2,Grb2,Hax1,Kdelr1,Lama5,Map3k14,Nfkb2,Nfkbia,Notch2,Sh3kbp1,Sppl2a,Zfp318
MP:0010289	increased urinary system tumor incidence	0.000235	0.00417	16	4421	Common	Ahr,Apc,Cdkn1a,Cdkn2c,Ctnnb1,Dkc1,Flcn,Htatip2,Ncstn,Nf2,Pcbp4,Pten,Ralgapa2,Sptbn1,Trp53,Tsc2
MP:0004262	abnormal physical strength	0.000242	0.0043	239	4421	Common	2310022B05Rik,Abcg2,Abtb2,Ackr3,Adarb1,Adgrf5,Adipor2,Agl,Agtpbp1,Akna,Akr1b8,Als2,Ank,Ap4e1,App,Aqp1,Araf,Arhgap10,Arhgap23,Arid1b,Armh3,Arrb2,Aspa,Atg5,Bace1,Bag3,Bahd1,Bbs4,Bicd1,Bmpr1a,Btd,Cap2,Cav1,Cbx5,Cd200,Cd55,Cd59a,Cd86,Cdc42,Cdk5,Cdkal1,Cdon,Cept1,Chd2,Chsy1,Cisd2,Cntn1,Col12a1,Col4a1,Col6a2,Cpe,Crebbp,Cript,Cryab,Csnk2b,Ctdsp1,Ctsd,Ctsf,Dag1,Dbi,Des,Dlg4,Dmd,Dnaja1,Dnajc5,Dnmt3a,Dst,D…
MP:0008706	decreased interleukin-6 secretion	0.000246	0.00435	56	4421	Common	Abhd16a,Azi2,Ccr5,Cd14,Cd200r1,Cd36,Clic4,Cnpy3,Coro1a,Cul5,Dhx58,F3,Fastk,Hif1a,Hmox1,Ifih1,Ifit2,Ifnar1,Ikbkb,Il1r1,Il1rap,Il33,Irak2,Irak4,Irf5,Lgmn,Map3k8,Mavs,Mex3c,Mtdh,Myd88,Nampt,Ndrg2,Nfkb1,Nfkbiz,Nlrc5,Nod1,Patz1,Peli1,Pycard,Ripk2,Sgms1,Siglec1,Slc15a4,Sqstm1,Stim1,Tlr1,Tlr2,Tlr4,Tnfaip3,Tnfrsf1a,Tollip,Tradd,Traf3ip2,Traf6,Unc93b1
MP:0005076	abnormal cell differentiation	0.000258	0.00456	326	4421	Common	Abhd5,Acvr1,Acvr1b,Adam10,Adam8,Adgrg1,Adgrg6,Akr1a1,Ank,Ank2,Ap1s2,Apaf1,Apc,Arfgef1,Arhgap32,Arhgef11,Arid4a,Asah1,Atm,Atp2a2,Atp6v0d2,Atp6v1h,Azi2,B4gat1,Basp1,Bax,Bclaf1,Bdnf,Bmp4,Bmpr1a,Bmpr1b,Braf,Brpf1,Bscl2,Casp8,Ccdc88a,Ccny,Cd44,Cd47,Cdh2,Cdkn1b,Cdkn2c,Cebpb,Cebpd,Cfl1,Chn1,Chuk,Cnot3,Cntn1,Cpeb4,Creb3l1,Crebbp,Csf1,Csf1r,Ctnna1,Ctnnb1,Ctsk,Dag1,Dclk1,Dicer1,Dido1,Disp1,Dkk2,Dlg5,Dpysl3…
MP:0002408	abnormal double-positive T cell morphology	0.000261	0.00459	112	4421	Common	Adam10,Aff1,Arid5b,Atm,Bcl10,Bcl2l1,Bhlhe40,Bmi1,Cadm1,Cbx4,Ccnd3,Cd59a,Cdk6,Chd4,Ciita,Cops5,Crebbp,Ctcf,Ctsd,Cux1,Cxcr4,Cyld,Dck,Dll4,Dnajc11,Drosha,Dyrk1a,E2f4,Eef1a1,Elavl1,Ep300,Esr1,Ets1,Ezh2,Fas,Fbxw7,Fos,Foxo1,Gba,Grb2,Hax1,Hivep3,Hnrnpl,Htra2,Id3,Ikzf1,Il6st,Il7r,Irf1,Kitl,Kmt2e,Lama2,Lcp2,Map3k3,Mapk1,Mcl1,Mmp19,Msi2,Mtor,Ncaph2,Nckap1l,Nfatc1,Nfkb2,Nfkbia,Nkap,Nlk,Nmt1,Nmt2,Noc2l,Nr3c1…
MP:0005092	decreased double-positive T cell number	0.000261	0.00459	95	4421	Common	Adam10,Aff1,Arid5b,Atm,Bcl10,Bcl2l1,Bhlhe40,Bmi1,Cbx4,Ccnd3,Cdk6,Chd4,Cops5,Crebbp,Ctcf,Ctsd,Cux1,Cxcr4,Dck,Dll4,Dnajc11,Drosha,Dyrk1a,E2f4,Elavl1,Ezh2,Fos,Foxo1,Gba,Grb2,Hax1,Hivep3,Hnrnpl,Htra2,Ikzf1,Il6st,Il7r,Kitl,Kmt2e,Lama2,Lcp2,Map3k3,Mapk1,Mcl1,Msi2,Mtor,Ncaph2,Nckap1l,Nfatc1,Nfkb2,Nfkbia,Nkap,Nlk,Nmt1,Nmt2,Noc2l,Nr3c1,Ogt,Parl,Phf20,Pnp,Ppp4c,Prkch,Prkdc,Prnp,Psme3,Ptpn2,Ptprc,Rad21,Rbpj…
MP:0005330	cardiomyopathy	0.000261	0.00459	95	4421	Common	Abca1,Abca5,Abcb8,Abcc9,Acadm,Acadvl,Acan,Aifm1,Bag3,Bin1,Camk2d,Camta2,Cap2,Cast,Cav1,Cenpf,Chd2,Clcn3,Cnot3,Ctnna1,Ctsl,Dag1,Des,Dicer1,Dmd,Dnaja3,Dtna,Ecsit,Egln1,Erbb2,Fnip1,Gas2l3,Gja5,Gla,Gnaq,Hadhb,Hccs,Hexim1,Itgb1,Jup,Klf15,Lama4,Large1,Lmna,Lrp1,Map2k3,Map3k7,Mapk14,Mcoln1,Mdm4,Med1,Mef2c,Mef2d,Mterf3,Mto1,Mtor,Myh10,Myh11,Myo6,Myocd,Nexn,Nov,Nr2f2,Pdlim3,Pdlim5,Phc1,Plrg1,Ptger4,Ptpn11…
MP:0012505	increased neural tube apoptosis	0.000264	0.00462	21	4421	Common	Ambra1,Aph1a,Atp2c1,Brd2,Daxx,Dph3,Enpp2,Hsd17b7,Icmt,Kat14,Kdm2b,Lemd2,Lmo4,Ncstn,Rad54l2,Rrn3,Tcof1,Tjp1,Tulp3,Vcl,Vegfa
MP:0012431	increased lymphoma incidence	0.00027	0.00473	102	4421	Common	Anxa7,Atad5,Atm,Bad,Bap1,Becn1,Brca2,Cdc37,Cdkn1a,Cdkn2c,Chd2,Chfr,Cop1,Crebbp,Cul9,Dclre1a,Dkc1,Egr1,Eif4e,Fbxo4,Fbxw7,Flcn,Gpx7,Hace1,Hip1,Hmga1,Id1,Ikzf1,Ing1,Inpp5d,Irf1,Irf8,Kmt2a,Lig1,Map3k8,Mcm3,Mcm4,Met,Mlh1,Msh2,Msh6,Mtf1,Mtss1,Mtus1,Nabp2,Nbn,Ncoa3,Ndrg1,Ndrg2,Nf1,Nf2,Nme1,Notch3,Npm1,Nrbp1,Nsmce2,Pcbp4,Pdcd4,Per2,Pim1,Pml,Pms2,Ppp5c,Prdx1,Prkdc,Pten,Ptpn11,Rad50,Rassf1,Rbbp8,Rc3h1,Rint…
MP:0013701	abnormal mature B cell number	0.000275	0.00481	183	4421	Common	Ackr3,Adam10,Adpgk,Aff1,Akap9,Ano10,Arhgap17,Arhgef1,Arhgef6,Atmin,Atp11a,Bad,Bcl10,Bcl3,Bcl6,Birc3,Blnk,Bmi1,Bst1,Btk,Casp8,Cd22,Cd274,Cd59a,Cd72,Cd81,Cd84,Clec4d,Clpp,Cog6,Crls1,Cxcr4,Cyld,Dapp1,Diaph1,Dicer1,Dock10,Dock2,Dock8,Dynll1,Dyrk1a,Ebf1,Elk4,Ell2,Elmo1,Ep300,Eps15,Esr1,Ets1,Ezh2,Fam92a,Fas,Fbn1,Fcgr2b,Fli1,Fnip1,Foxp1,Galnt1,Gdi2,Git2,Gmds,Gpr183,Grb2,Hax1,Huwe1,Ifih1,Ifnar1,Igbp1,Ikb…
MP:0010900	abnormal pulmonary interalveolar septum morphology	0.000279	0.00487	37	4421	Common	Abca3,Atp7a,B4galt1,Cav1,Cav2,Ctsk,Cux1,Dusp1,Egfr,Epas1,Errfi1,Fbn1,Fbxw7,Gak,Hat1,Hck,Hif1a,Itga3,Kdm6b,Man1a2,Mmp14,Ndst1,Nos3,Npc1,Npc2,Nr3c1,Pdgfa,Pkdcc,Pten,Robo1,Sgpl1,Slc27a4,Tgfb3,Tie1,Tomm5,Trps1,Vegfa
MP:0008803	abnormal placental labyrinth vasculature morphology	0.00028	0.00488	54	4421	Common	Birc6,Braf,Ccm2,Ctbp2,Ctnnb1,Cyr61,Ddx3x,Dlc1,Dph3,Elavl1,Erg,Ern1,Fbxw8,Ggnbp2,Hgf,Hus1,Itgb1,Itgb8,Lama5,Map2k1,Map3k3,Mapk1,Mapk14,Mapk7,Med1,Med24,Myh9,Ncoa6,Nr2f2,Numb,Pdgfb,Pdgfrb,Pdzrn3,Pkd2,Pnpla6,Pparg,Raf1,Rbpj,Rictor,Sav1,Sdc4,Senp1,Setd2,Slk,Snx13,Ss18,Ssr3,Syde1,Tjp1,Ube2l3,Ubp1,Ubr4,Wasf2,Wnk1
MP:0002024	increased T cell derived lymphoma incidence	0.000284	0.00492	44	4421	Common	Atad5,Atm,Brca2,Cdkn1a,Cdkn2c,Chd2,Cop1,Crebbp,Egr1,Fbxw7,Hace1,Hip1,Id1,Ikzf1,Map3k8,Mcm4,Mlh1,Msh2,Mtf1,Nabp2,Nbn,Ndrg1,Ndrg2,Notch3,Pim1,Pms2,Prdx1,Prkdc,Pten,Ptpn11,Rad50,Rc3h1,Runx1,Skil,Smarcb1,Spi1,Srpx,Tgfbr2,Trp53,Trp53bp1,Trp53bp2,Uimc1,Xrcc6,Zeb1
MP:0005031	abnormal trophoblast layer morphology	0.00029	0.00502	83	4421	Common	Adam17,Alkbh1,Arid1a,Arnt,Atrx,Birc6,Braf,C3,Ccdc134,Cdk12,Cdk7,Chm,Cops2,Csnk2b,Cul3,Cul7,Ddx3x,Dnm1l,Egfr,Egln1,Ehmt2,Elavl1,Enpp2,Ern1,Ets2,Fbxw8,Fgfr2,G6pdx,Gab1,Hgf,Hsf1,Hsp90ab1,Ikbkap,Il11ra1,Itgav,Itgb1,Itgb3,Itgb7,Jup,Kdm6a,Lama5,Map2k1,Mapk1,Mapk14,Med1,Met,Mfn2,Mga,Mpi,Mtor,Myh9,Ncoa6,Nr2f2,Numb,Pbrm1,Pdgfb,Pdgfra,Pdgfrb,Pmm2,Pnpla6,Pparg,Pten,Ptp4a2,Rad23b,Raf1,Rbpj,Rptor,Rybp,Senp2,S…
MP:0004951	abnormal spleen weight	0.000291	0.00503	124	4421	Common	Adam10,Adh5,Ahr,Aif1,Akap13,Asah1,Atl2,Atmin,Atr,Bag3,Bmi1,Bok,Braf,C4b,Cd72,Cdkn1a,Cdkn1b,Coro1a,Csf1,Csf1r,Cul4a,Cxcr4,Dbnl,Dck,Diaph1,Dido1,Dusp6,Efemp1,Egln1,Egr1,Ep300,Epas1,Ercc5,Ets1,Fas,Fech,Gba,Ghr,Glmp,Gpi1,Grb14,Grk6,Gstz1,Hgsnat,Hk1,Il10rb,Inpp5d,Jak2,Kat6a,Kdm6a,Klf3,Klhl6,Ldha,Lgmn,Lipa,Lyn,Mark2,Mfge8,Msi2,Mxra7,Ndfip1,Nfe2l2,Nfkb2,Notch2,Npm1,Nras,Nxn,P2ry14,Pard3,Pawr,Pcid2,Pfkm,…
MP:0005464	abnormal platelet physiology	0.000292	0.00505	68	4421	Common	Abca1,Adam10,Adam17,Ano6,Anxa7,Ap3b1,Arhgef3,Bak1,Bcl2l1,Bloc1s5,Bloc1s6,Capn1,Cd47,Cdc42,Clic1,Emilin1,Emilin2,Entpd1,Fads2,Gna13,Gnaq,Gpx1,Gsn,Gucy1a1,Gucy1b1,Hps1,Hps3,Hps4,Inpp5d,Itgb1,Itgb3,Lcp2,Mertk,Myh9,Nbeal2,Nos2,Nt5e,Orai1,Pdia4,Pdlim1,Pear1,Pik3c2a,Pik3cb,Pik3cg,Plcg2,Pld1,Plek,Procr,Pten,Ptgs1,Ptgs2,Ptpn9,Rab27a,Rac1,Ranbp10,Rap1b,Scube1,St3gal4,Stim1,Svil,Syk,Tbxas1,Tec,Tln1,Vamp3,V…
MP:0005598	decreased ventricle muscle contractility	0.000296	0.00507	71	4421	Common	Aars,Abhd5,Acadvl,Adcy6,Adipoq,Adm,Akap13,Atp1b1,Atp2a2,Cap2,Capn1,Cast,Cav1,Cdc42,Cdh2,Clcn3,Cnot3,Col4a3bp,Crem,Ctsl,Des,Dnaja3,Dnm1l,Egfr,Egln1,Emd,Erbb2,Gja1,Gnaq,Hdac3,Hprt,Hspb8,Itgb1,Jup,Klf15,Lama4,Lmna,Map2k3,Map3k1,Mapk14,Mcu,Mef2c,Mfn2,Mtor,Nae1,Ndufs6,Nox4,Pdlim3,Pdlim5,Phc1,Plat,Plekhg5,Plrg1,Ptgs2,Ptpn11,Rab1a,Raf1,Ryr2,Snrk,Sod2,Srf,Thra,Timp3,Tmod1,Tpm1,Txnip,Vav3,Vcl,Wdr1,Yme1l1,…
MP:0006009	abnormal neuronal migration	0.000296	0.00507	71	4421	Common	Adgrg1,Apaf1,Arfgef2,Arhgef2,B4gat1,Bicd2,Brpf1,Ccdc141,Ccdc88a,Cdh2,Cdkn1b,Cdkn2c,Cdyl,Dag1,Dync1li1,Fgfr1,Fkrp,Flrt2,Gli3,Gnpat,Hk2,Itga5,Itga6,Itgb1,Kat6b,Kif2a,Kmt2a,Lmnb1,Lrp8,Manf,Map3k12,Mdga1,Mib1,Myh10,Nde1,Nrp1,Nrp2,Ntrk2,Pak4,Pex13,Pex7,Plaa,Plaur,Plxna2,Plxnc1,Pomgnt2,Pomt2,Psen1,Pten,Rbfox2,Reln,Ric8a,Robo1,Sdccag8,Sema3f,Sema4c,Smad2,Smarcb1,Smo,Sun1,Top2b,Trio,Trp53bp2,Tuba1a,Vegfa…
MP:0010867	abnormal bone trabecula morphology	0.000296	0.00507	71	4421	Common	Abhd5,Adipoq,Akr1a1,Cav1,Cd68,Cebpb,Chsy1,Ciita,Cnot3,Col1a2,Csf1,Ctsk,Eif4e3,F2r,Fam20c,Farp2,Fblim1,Fbn1,Fig4,Fos,Fosl2,Galc,Hivep3,Ibsp,Ifngr1,Igf1r,Inpp5d,Jak1,Jdp2,Klf10,Lmna,Lrrk1,Mcph1,Mgp,Mia3,Naca,Nbr1,Ncor2,Notch2,Nov,Npr2,Npr3,Npy1r,P3h1,Pdia3,Plekhm1,Pparg,Ppib,Ptpn2,Rassf2,Rnf146,Rps6ka3,Serpinf1,Sh3bp2,Slc39a14,Smad1,Snx10,Socs2,Sost,Spop,Src,Suco,Tent5a,Thra,Tmem119,Tmem64,Tnfrsf11…
MP:0012775	abnormal brain weight	0.000296	0.00507	71	4421	Common	Adipor2,Akt3,App,Aspm,Ate1,Atr,Atxn1,B4galt2,Bckdk,Bcl2l1,Bdnf,Braf,Cav1,Cd81,Cdkn1a,Cdkn1b,Copb2,Ctnna1,Ctsf,Cyp27a1,Dyrk1a,Ghr,Gnpat,Hdac2,Hfe,Htra2,Kif1bp,Klf3,Lama2,Mbd1,Mbd5,Mecp2,Mut,Nbea,Nbn,Nde1,Nfix,Npc1,Nrd1,Pdha1,Pfdn5,Phf2,Phgdh,Pikfyve,Ppt1,Prmt5,Pten,Ptrh2,Pura,Rb1,Rere,Rheb,Selenbp1,Sirt1,Slc12a6,Slc2a1,Smarca1,Spen,Spg11,Ssb,Sun1,Tardbp,Tcf4,Tkt,Tsc2,Ube3a,Uqcrfs1,Zdhhc13,Zdhhc17,…
MP:0003420	delayed intramembranous bone ossification	0.000306	0.00522	23	4421	Common	Alkbh1,Ctnna1,Ctnnb1,Ehmt1,Fam20c,Fgfr2,Fgfrl1,Flnb,Foxn3,Fuz,Gja1,Ibsp,Kat6b,Lrp6,Mmp14,Nipbl,Pex2,Sik3,Sp3,Stag1,Suco,Thra,Wls
MP:0013836	abnormal hypoglossal nerve topology	0.000306	0.00522	23	4421	Common	4933434E20Rik,Atg16l1,Brd2,Capza2,Cir1,Crim1,Dhx35,Fut8,H13,Hmgxb3,Morc2a,Nsun2,Polb,Prmt7,Prrc2b,Rpgrip1l,Setd5,Sh3pxd2a,Slc20a2,Smg9,Ssr2,Xpnpep1,Zmynd11
MP:0001256	abnormal body length	0.000307	0.00522	198	4421	Common	Abhd5,Acsl3,Acsl4,Adam17,Adar,Adgrf5,Akap11,Aktip,Ank,Ankrd11,Ankrd26,Apc,Arhgap18,Arhgap23,Arid1b,Arid5b,Arrdc3,Aspa,Ate1,Atr,Axin1,Baz1a,Bbx,Bdnf,Bmp6,Bmper,Bnip3l,Bzw2,Cbx5,Cbx7,Cdc42,Cdo1,Cfl2,Chd2,Chd7,Clip2,Clpp,Cnot3,Cpe,Ctsk,Cul3,Daam2,Degs1,Dennd1b,Dgat2,Dlg1,Dnajc10,Dock7,Dse,Dusp11,Dym,Dyrk1a,Egr1,Eif4g2,Eif4h,Esr1,Evc2,Eya3,Ezh1,Fam20c,Fgfr2,Fto,G6pc3,Ghr,Gigyf2,Gnptab,Gpx1,Grb2,Gsk3a…
MP:0010502	ventricle myocardium hypoplasia	0.000316	0.00536	42	4421	Common	Ate1,Atp2a2,Daam1,Dll4,Dnaja3,Ep300,Fbln1,Flrt2,Foxp1,Gja1,Gys1,Itgav,Jarid2,Jup,Lats2,Map3k3,Mapk7,Med1,Med24,Mef2c,Megf8,Ncoa6,Nprl3,Pdlim3,Pparg,Rbp4,Rbpj,Shc1,Smad4,Sptbn1,Srf,Tbx18,Tead1,Tgfb2,Tgfbr3,Ubp1,Vegfa,Wasf2,Wnk1,Ywhae,Zfp36l1,Zfpm2
MP:0011634	abnormal mitochondrial inner membrane morphology	0.000319	0.0054	33	4421	Common	Abcg2,Acad8,Adgrg6,Aifm1,Cd44,Cisd2,Clec16a,Clpp,Dnajc11,Hdac3,Hgsnat,Hprt,Hspd1,Htra2,Lrrk2,Mpv17,Mto1,Mut,Ndufs4,Nr2f2,Opa1,Pex13,Pex5,Phc1,Pnpt1,Rnaseh1,Sod1,Sod2,Sqstm1,Tfam,Tk2,Vcp,Wdr81
MP:0012734	abnormal response to radiation	0.000319	0.0054	33	4421	Common	Atm,Bid,Brca2,Ccng1,Cdkn1a,Cops6,Erc1,Hmgn1,Ing1,Ino80,Kcnj8,Kitl,Kmt2a,Kmt2e,Mcph1,Mdc1,Mdm4,Mre11a,Nabp2,Nbn,Nos2,Parg,Parp1,Parp2,Per2,Prkdc,Rassf1,Rpl27a,Trp53,Trp53bp1,Tsn,Uimc1,Usp1
MP:0001879	abnormal lymphatic vessel morphology	0.000327	0.00549	47	4421	Common	4933434E20Rik,Angpt2,Angptl4,Antxr2,Atg16l1,Brd2,Cdh5,Cmip,Crim1,Cyp51,Dhx35,Dstn,Efnb2,Fat1,Flt4,Gja1,Heg1,Kdr,Lgals8,Lyve1,Morc2a,Nf1,Nfat5,Nr2f2,Nrp2,Ntn4,Pik3ca,Plcg2,Plxna1,Plxna2,Polb,Ppp1r13b,Ptger4,Pth1r,Ptpn14,Ramp2,Rpgrip1l,Sema3f,Setd5,Sh3pxd2a,Smg9,Syk,Tent5c,Tie1,Tmem204,Ube3b,Vegfa
MP:0004215	abnormal myocardial fiber physiology	0.000327	0.00549	97	4421	Common	Aars,Abcc9,Acp1,Adm,Aifm1,Akap12,Akap6,Aqp1,Ate1,Atg5,Atp1b1,Atp2a2,Bach1,Bag3,Bmpr1a,Bnip3,Bnip3l,Cacna1c,Cacnb2,Calcrl,Cap2,Capns1,Casp3,Casp8,Ccnd2,Ccnd3,Cenpf,Chd7,Clcn3,Crat,Des,Dicer1,Dmd,Dnaja3,Dnm1l,Dusp6,Egln1,Eif4ebp1,Gja1,Glrx3,Gnao1,Gnaq,Hccs,Hdac2,Hif1a,Hmox1,Hprt,Il6st,Inpp5f,Ivns1abp,Jup,Kcnj8,Kifap3,Maoa,Map2k1,Map3k1,Mapk1,Mapk14,Mapk8,Mapk9,Mapkapk2,Mcu,Mdm4,Med1,Mfn2,Micu2,Mtor…
MP:0004227	increased cellular sensitivity to ionizing radiation	0.000327	0.00549	47	4421	Common	Apbb1,Apex2,Atm,Bad,Ccng1,Cdkn1a,Chd2,Cops6,Crebbp,Ddx5,Elavl1,Ercc3,Hif1a,Hmgn1,Ikbkb,Ing1,Kat8,Mcm9,Mcph1,Mdc1,Mre11a,Mta1,Nabp2,Nbn,Ninj1,Parp14,Parp2,Paxip1,Pnp,Prkdc,Ptgs1,Rad50,Rif1,Rnf168,Sirt1,Sod2,Stat6,Swap70,Tigar,Trp53,Trp53bp1,Uimc1,Usp4,Wee1,Xrcc4,Xrcc5,Xrcc6
MP:0005153	abnormal B cell proliferation	0.000327	0.00549	97	4421	Common	Arhgdib,Arhgef1,Arhgef6,Bcl10,Bcl3,Bcl6,Birc3,Blnk,Btk,Casp8,Ccnd3,Cd22,Cd59a,Cd72,Cd74,Cd81,Clec4d,Ctnnbl1,Dapp1,Dok1,Ebf1,Elf4,Ep300,Ercc1,Ets1,Ezh2,Fli1,Grb2,Huwe1,Id3,Igbp1,Ikbkb,Ikzf1,Irak4,Irf2,Kmt2d,Lgals9,Ly86,Lyn,Magt1,Map3k14,Map3k7,Mark2,Mavs,Mcm3ap,Mtor,Myd88,Nbn,Ncoa3,Nfatc1,Nfkb1,Nfkb2,Nfkbia,Notch2,Otud7b,Parp14,Pawr,Peli1,Pik3ap1,Pik3r1,Plcg2,Plcl2,Pnp,Pparg,Ppm1d,Ppp2r3c,Prkcd,Pr…
MP:0000752	dystrophic muscle	0.000332	0.00554	25	4421	Common	B4gat1,Col4a1,Ctss,Dag1,Des,Dmd,Dtna,Dysf,Fkrp,Htra2,Itga7,Lama2,Large1,Lmna,Maml1,Pomgnt1,Rptor,Sgcb,Sgcd,Sgcg,Supv3l1,Syne1,Tln2,Trim32,Zmpste24
MP:0010089	abnormal circulating creatine kinase level	0.000332	0.00554	25	4421	Common	Acaa1a,Agl,Ano10,Col4a1,Dag1,Dmd,Dysf,Epb41,Epc1,Fkrp,Gbe1,Ghr,Hif1a,Hspb7,Itga7,Large1,Lmna,Mpv17,Nos3,Pik3r4,Sgcd,Sgcg,Sync,Zdhhc13,Zmpste24
MP:0020279	abnormal creatine kinase level	0.000332	0.00554	25	4421	Common	Acaa1a,Agl,Ano10,Col4a1,Dag1,Dmd,Dysf,Epb41,Epc1,Fkrp,Gbe1,Ghr,Hif1a,Hspb7,Itga7,Large1,Lmna,Mpv17,Nos3,Pik3r4,Sgcd,Sgcg,Sync,Zdhhc13,Zmpste24
MP:0020149	abnormal mortality induced by ionizing radiation	0.000334	0.00556	31	4421	Common	Atm,Bid,Brca2,Ccng1,Cdkn1a,Cops6,Erc1,Hmgn1,Ing1,Kcnj8,Kitl,Kmt2a,Kmt2e,Mcph1,Mdc1,Mdm4,Mre11a,Nabp2,Nbn,Nos2,Parg,Parp1,Parp2,Per2,Prkdc,Rassf1,Rpl27a,Trp53,Trp53bp1,Uimc1,Usp1
MP:0005666	abnormal adipose tissue physiology	0.000345	0.00574	55	4421	Common	Acadvl,Angptl2,Angptl4,Anxa1,Appl1,Arhgap5,Arhgef11,Ate1,Atf3,Bscl2,Cav1,Ccny,Cd36,Cebpb,Col3a1,Crtc3,Dbi,Ecscr,Ehmt1,Eif4ebp1,Eprs,Fabp3,Fam213a,Fgfr2,Foxo1,Gadd45g,Grb10,Kbtbd2,Kdm3a,Khdrbs1,Lipe,Lpin1,Lrp1,Mark3,Ncor2,Nr2c2,Osmr,Plin2,Pparg,Prdm16,Prdx3,Prkag2,Prkg1,Pten,Ptgs2,Rhbdf2,Ripk1,Sat1,Scara5,Sorbs1,Sqstm1,Tbl1xr1,Trp53,Tsc22d3,Wls
MP:0008008	early cellular replicative senescence	0.00035	0.0058	40	4421	Common	Atmin,Atr,Babam2,Bmi1,Brca2,Cdc14b,Cdk5rap2,Clpp,Ctc1,Cul7,Dicer1,Eif4e,Eloa,Ep300,Ercc1,Ezh1,Gnl3,Hif1a,Ino80,Kdm5a,Kmt2a,Mcm9,Mgea5,Ncoa4,Pa2g4,Patz1,Phc2,Scmh1,Skil,Slx4,Sod2,Telo2,Terf1,Tpp2,Trim27,Trp53,Uimc1,Usp4,Xrcc6,Zfp277
MP:0005584	abnormal enzyme/coenzyme activity	0.000351	0.00582	130	4421	Common	Abcb7,Abhd12,Abhd16a,Abhd5,Acaca,Acadl,Acadvl,Ace,Acot13,Acvrl1,Adcy5,Ahr,Aifm1,Akr1a1,Aldh2,Aldh3a2,Angptl4,Ap3b1,Asah1,Asl,Atox1,Atp6v1h,Atp7a,B4galt1,Bcl3,Cat,Cbl,Ccs,Cebpb,Cpeb2,Crim1,Cspg4,Ctsc,Cyld,Ddah1,Dgkd,Dhrs3,Dmd,Dsel,Ednrb,Enpp1,Exoc6,Fas,Galc,Gapdh,Gba,Gba2,Gde1,Glrx2,Glud1,Gnaq,Gnptab,Gnptg,Gpi1,Gpx1,H6pd,Hacd1,Hck,Hgsnat,Hprt,Hsd11b1,Ifnar1,Ikbkb,Jak1,Jak2,Klf15,Lamp2,Large1,Ldha,…
MP:0011087	neonatal lethality, complete penetrance	0.00036	0.00595	283	4421	Common	Abca3,Acan,Ackr3,Acvr1,Acvr2a,Adam17,Adgra2,Ago2,Aldh1a3,Apc,Arfgef1,Arid1a,Arnt,Atf2,Atg12,Atg16l1,Atg3,Atg5,Atg7,Atg9a,Atp1a2,Bag6,Bin1,Birc6,Bmper,Bmpr1a,Bnc2,Braf,Cacna1c,Cadps,Caprin1,Carm1,Cask,Cbx4,Ccdc47,Cdh2,Chd7,Chuk,Clip3,Cluh,Cnn3,Col27a1,Creb3l2,Ctgf,Ctnnb1,Ctnnd1,Cul7,Cxcl12,Cxcr4,Cyfip2,Cyld,Cyr61,Ddb1,Dgat2,Dgkd,Dhrs3,Disp1,Dlg1,Dusp16,Dync1h1,Ece1,Edn1,Ednrb,Efnb2,Eif2s1,Eif4e2,E…
MP:0008944	decreased sensitivity to induced cell death	0.000364	0.00601	50	4421	Common	Antxr1,Antxr2,Apaf1,Atm,Casp3,Casp9,Cd44,Cebpb,Cul9,Dab2ip,Dapk1,Dusp6,Eef2k,Ero1l,Glipr1,Glrx,Gpx1,Hint1,Hipk1,Hipk2,Hsf1,Ift122,Irf3,Jun,Map3k5,Mbd4,Mdm4,Mlh1,Mre11a,Nbn,Ndrg1,Nit1,Pawr,Per2,Pten,Ptpn6,Raf1,Rchy1,Ripk1,Setd7,Shc1,Smug1,Spout1,Spp1,Stat1,Tradd,Trim27,Trp53,Ubqln1,Ucp2
MP:0012765	decreased alpha-beta T cell number	0.000378	0.00623	202	4421	Common	4933434E20Rik,Acp2,Adam10,Aldh2,Ap1g1,Ap4e1,Arhgef1,Arhgef6,Arid5a,Aspm,Atg3,Atg5,Atm,Atp5f1,B2m,Bcl6,Bclaf1,Becn1,Bnip2,Cadm1,Casc4,Casp8,Ccr1,Cd274,Cd74,Cd83,Cd84,Cd86,Cdk6,Cdkal1,Chd9,Ciita,Clpp,Cnot4,Cog6,Coro1a,Crebbp,Csk,Ctcf,Ctr9,Ctsl,Cxcr4,Cyld,Dck,Dctn1,Ddah1,Def6,Dennd1b,Dennd4c,Denr,Diaph1,Dicer1,Dll4,Dnmt3a,Dock2,Dock8,Drosha,Elavl1,Elk4,Elmo1,Esr1,Ets1,Fam234b,Fam96a,Fas,Fbf1,Fbxo7,F…
MP:0009117	abnormal white fat cell morphology	0.000397	0.00653	67	4421	Common	Adcy3,Arhgef11,Arrdc3,Ate1,Atf3,Bscl2,Cav1,Ccdc3,Ccny,Cdkn1a,Cdkn1b,Ces1d,Cidea,Cnot3,Crtc3,Cspg4,Cxcr4,Ehmt1,Eprs,Esr1,Fmo5,Fto,Ghr,Gk5,Grb10,Hif1an,Kdm3a,Ksr1,Lamp2,Lclat1,Lipa,Lipe,Lnpep,Lpin1,Lrp1,Ncoa3,Ncor1,Ncor2,Nos3,Npr3,Nr2c2,Pcna,Pdgfrb,Phf2,Pla2g16,Plin2,Plscr3,Pparg,Prdx3,Prkag2,Pten,Ptpn11,Rab18,Rapgef3,Rbl1,Rptor,Saa3,Samd4,Sik2,Sqstm1,Tardbp,Tbc1d4,Tbl1xr1,Tgfb1,Tlr2,Trib1,Wdr13
MP:0010911	abnormal pulmonary acinus morphology	0.000398	0.00653	124	4421	Common	Abca1,Abca3,Adamts2,Adgrf5,Aff4,Aimp1,Ap3b1,Asah1,Atp7a,Atxn1l,B4galt1,Bid,Bloc1s6,Bmper,Bmpr1a,Bmpr2,Cav1,Cav2,Cebpg,Cic,Col27a1,Crebbp,Ctgf,Ctsa,Ctsk,Cux1,Dbnl,Dkc1,Dusp1,Egfr,Epas1,Errfi1,Fam20a,Fbln1,Fbln5,Fbn1,Fbxw7,Fgfr2,Flna,Foxp2,Fstl1,Fubp1,Fut8,Gak,Grb10,Hat1,Hck,Hif1a,Hikeshi,Hps1,Hsd11b1,Hspa5,Igf1,Inpp5d,Itga3,Jun,Kdm6b,Kmt5b,Lama5,Lipa,Lmnb1,Lox,Loxl1,Loxl3,Lpl,Lrrk2,Lyst,Lyz2,Man1a…
MP:0008188	abnormal transitional stage B cell morphology	0.000414	0.00678	48	4421	Common	Adam10,Akap13,Arhgap17,Bax,Bcl3,Blnk,Btk,Cd22,Cd36,Ebf1,Ell2,Ep300,Eps15,Erg,Fas,Fli1,Fnip1,Grb2,Hax1,Huwe1,Irf8,Kdelr1,Lama5,Lyn,Map3k14,Mtor,Nfkb2,Nfkbia,Notch2,Npy1r,Pepd,Plcg2,Ppp2r3c,Prkcd,Ptpn22,Ptprc,Sh3bp2,Sh3kbp1,Sppl2a,St6gal1,Tnfsf13b,Traf3,Traf3ip2,Vav1,Vcam1,Zbtb1,Zfp318,Zfp365
MP:0010503	myocardial trabeculae hypoplasia	0.000421	0.00687	36	4421	Common	Adgrg6,Akap13,Btaf1,Cenpf,Dll4,Dnaja3,Gys1,Itgav,Jarid2,Jmjd6,Jup,Kdm6a,Lats2,Lemd2,Map3k3,Mapk7,Med1,Med24,Mef2c,Megf8,Myh10,Ncoa6,Pdcd10,Pdlim3,Rbp4,Rbpj,Shc1,Sptbn1,Srf,Tead1,Tgfb2,Tgfbr3,Ubp1,Wasf2,Wnk1,Zfp36l1
MP:0011390	abnormal fetal cardiomyocyte physiology	0.000421	0.00687	36	4421	Common	Abcc9,Adam17,Arid2,Bag3,Bmpr1a,Cacna1c,Calcrl,Cdkn1b,Cenpf,Chd7,Fgfr1,Foxp1,Gas2l3,Gbe1,Gys1,Hand2,Hccs,Hdac2,Hspb7,Jarid2,Kmt2d,Mapk14,Mfn2,Naca,Nae1,Ncoa6,Nfat5,Nos3,Ppp2r5c,Rbp4,Rbpj,Sos1,Sptbn1,Tbx18,Tgfbr3,Ywhae
MP:0000443	abnormal snout morphology	0.000427	0.00695	103	4421	Common	Acan,Adamts2,Adamts6,Alkbh1,Apaf1,Arid1a,Arid5b,Baz1b,Bmp4,Cask,Chd7,Chuk,Col27a1,Crebbp,Ctnna1,Ctnnb1,Daam2,Ddr2,Ddx10,Dhx35,Dlg1,Dock1,E2f4,Ednra,Egfr,Fam20c,Fbln5,Fbxo11,Fgfr1,Fgfr2,Fos,Gja1,Gnptab,Gtf2i,Gusb,Hbs1l,Hipk2,Hsp90aa1,Hspg2,Hyal2,Ift172,Impad1,Inppl1,Itgb1bp1,Klhdc2,Kmt2a,Kmt2d,Lmna,Lpar1,Lrig3,Lrrk1,Ltbp1,Ltbp3,Mau2,Megf8,Mia3,Miga2,Mmp14,Mmp2,Nabp2,Nek1,Nipbl,Nisch,Npr2,Nsun2,Nxn…
MP:0011898	abnormal platelet cell number	0.000443	0.00721	133	4421	Common	Abca1,Abraxas2,Acsl4,Acsl5,Actl6a,Adam17,Add1,Aif1,Anxa7,Arid4a,Arrb1,Arrb2,Aspm,Atp6v1d,Bak1,Bap1,Bcl2l1,Cbl,Cd47,Cdc42,Cfh,Cflar,Clic1,Clpp,Copg1,Crlf3,Cul4a,Dicer1,Dkc1,Eftud2,Egln1,Egr1,Entpd1,Ep300,Erg,Etv6,Fbxo7,Fli1,Foxo3,Fyb,Hyal2,Id1,Il6st,Inpp5d,Ireb2,Irf8,Itgal,Itgb2,Jak1,Jak2,Kdm1a,Kdm6a,Kmt2a,Kmt2e,Knop1,Kpna1,Lmo2,Lpin2,Lrrk1,Lyn,Mdm4,Meis1,Mllt3,Mta1,Mtus1,Myh9,Nae1,Nbeal2,Ncoa3,Nd…
MP:0001787	pericardial edema	0.000452	0.00733	51	4421	Common	2700049A03Rik,Abi1,Adgrg6,Ago2,C2cd3,Casp8,Ccm2,Cdh2,Cfl1,Cflar,Ctnnb1,Dicer1,Disp1,Dll4,Eng,Fbxl5,Fbxw7,Flrt2,Flt4,Fuz,Ift46,Itgav,Jag1,Kdm6a,Kif3a,Kmt2d,Map3k7,Mapk7,Mib1,Mkl1,Mkl2,Naca,Notch2,Nprl3,Numb,Nup133,Pdgfra,Pkn2,Por,Rb1,Rev3l,S1pr1,Smad2,Smo,Sox9,Tbx2,Tcea1,Tdg,Ube4b,Wnk1,Zfpm2
MP:0001182	lung hemorrhage	0.000456	0.00738	34	4421	Common	Abca1,Abca3,Acvrl1,Adm,Aggf1,Ap3b1,Atox1,Braf,Chd2,Epha3,Erg,Fbn1,Git1,Heg1,Hspa5,Hspg2,Inpp5d,Lyz2,Man1a2,Mkl2,Mut,Nfe2l2,Nos3,Ntf3,Pdgfa,Plat,Prdm6,Prdx6,Psen2,Ptger4,Slit3,Tgfb3,Thbs1,Timp1
MP:0010464	abnormal aortic arch and aortic arch branch attachment	0.000456	0.00738	34	4421	Common	4933434E20Rik,Acvr1,Bmp4,Brd2,Chrd,Cmip,Col4a2,Crkl,Ece1,Ednra,Eya1,Fbln1,Fbln5,Gata6,Gja5,H13,Hand2,Hprt,Jag1,Kat6a,Morc2a,Myo9a,Nrp1,Nsun2,Pdgfra,Plxnd1,Prmt7,Ptpn11,Rala,Sec24b,Tcf7l2,Tgfb2,Tgfbr2,Vegfa
MP:0000600	liver hypoplasia	0.000463	0.00743	41	4421	Common	Adar,Arf6,Arhgap1,Arih2,Atp11a,Bag1,Ccdc134,Cdh5,Ddrgk1,Eif6,Ern1,Gata2,Hgf,Ikzf1,Jarid2,Jmjd6,Kat6a,Kitl,Kmt2a,Lig1,Mbtd1,Meis1,Nf1,Pbx1,Rad50,Raf1,Rb1,Rdh10,Rnaseh2b,Sh3pxd2a,Slc20a1,Sp3,Spen,Sptbn1,Tcea1,Tnip1,Trp53,Tsc2,Ttc7,Ubr4,Xbp1
MP:0001553	abnormal circulating free fatty acids level	0.000463	0.00743	111	4421	Common	Abhd5,Acaca,Acadl,Acot13,Acot7,Acss1,Adipoq,Aldh2,Ank2,Ankrd26,Apc,Bscl2,C1qtnf1,C3,Cav1,Cavin1,Cbl,Cc2d1b,Ccdc80,Ccl2,Ccny,Cd36,Cebpb,Ces1d,Chn1,Chuk,Cpt1a,Crat,Crbn,Crebbp,Crtc3,Dap,Dclk1,Dgat2,Dip2b,Dixdc1,Dnajc15,Dpy19l3,Dusp1,Ecscr,Ehmt1,Fabp3,Faf2,Foxo1,Fto,Gab1,Gfm1,Ghr,Hadh,Hadha,Hmgcr,Hmox1,Ift80,Inpp5k,Inppl1,Insr,Irs1,Itga8,Kdm3a,Kif26b,Lipa,Lipe,Lpin2,Lrp1,Mgat4a,Mier1,Mindy1,Mlxipl,N…
MP:0006055	abnormal vascular endothelial cell morphology	0.000463	0.00743	41	4421	Common	Adam19,Adm,Amotl2,Braf,Cav1,Cavin1,Cavin2,Ccm2,Cd44,Cdh5,Clic4,Col15a1,Crebbp,Ctnnb1,Fli1,Flna,Flt1,Git1,Hdac7,Itgb8,Mapk7,Metap2,Nos3,Pdgfb,Pdgfrb,Plekhg5,Plvap,Psap,Psen1,Ptk2,Ptpn12,Ptprj,Qk,Reck,S1pr1,Selp,Shc1,Smad5,Tek,Tie1,Vegfa
MP:0010763	abnormal hematopoietic stem cell physiology	0.000463	0.00743	41	4421	Common	Actl6a,Atg7,Bap1,Bid,Ccnd3,Cdh5,Cdk6,Cdkn1a,Csnk1a1,Cxcl12,Ddrgk1,Dkc1,Ezh1,Fan1,Fbxw7,Fubp1,Hif1a,Id1,Kdm6a,Kmt2a,Mcm3,Meis1,Msi2,Npm1,Pak2,Per2,Pml,Prkdc,Procr,Pten,Ptpn11,Rapgef2,Rb1cc1,Rpl27a,Ruvbl1,Spi1,Tet2,Tgfbr1,Tle4,Tnip1,Trp53
MP:0000010	abnormal abdominal fat pad morphology	0.000468	0.00749	126	4421	Common	Ace,Acot13,Acot7,Adipoq,Adipor2,Ank2,Ap1s2,Arrdc3,Asah1,Atf3,Bag3,Bbs2,Brd2,Bscl2,C1qtnf1,Cav1,Cbl,Ccl2,Ccny,Cdkal1,Cdkn1a,Cdkn1b,Cebpb,Cebpd,Clcn3,Crbn,Cspg4,Cxcr4,Dhcr24,Dok1,Dusp1,Ehmt1,Eif4ebp1,Eif4h,Esr1,Fam213a,Fmo5,Fosl2,Fto,Ghr,Gpam,Gpd2,Grb10,Hif1an,Hsd11b1,Id2,Igf1r,Il1r1,Insr,Kbtbd2,Kdm3a,Klf3,Kmt2b,Lamp2,Lgr4,Lipa,Lipe,Lpin1,Lpin2,Lrp1,Mapk8,Mbd5,Mlxipl,Mmp19,Myd88,Ncoa3,Ncor1,Ncor2,N…
MP:0000074	abnormal neurocranium morphology	0.000474	0.00757	130	4421	Common	4933434E20Rik,Acvr1,Adcy9,Alkbh1,Ank,Ankrd11,Anxa1,Apaf1,Arid1a,Arid5b,Atr,Baz1b,Bmp1,Bmp4,Bmper,Bmpr1a,Bnc2,Braf,Brd2,Cdon,Cebpb,Chrd,Chuk,Cir1,Coro1c,Crebbp,Crkl,Csf1,Ctnnb1,Ctsk,Dbn1,Ddr2,Dhx35,Disp1,Ece1,Ednra,Efnb1,Eya1,Fbln1,Fermt2,Fgfr1,Fgfr2,Fgfrl1,Flnb,Foxn3,Gas1,Gja1,Gli3,Gtf2ird1,Gusb,H13,Hand2,Hdac8,Hectd1,Hmgxb3,Hspg2,Ibsp,Ift140,Itgb1bp1,Kat6b,Kif3a,Lama5,Lmna,Lmo4,Lrp6,Ltbp1,Ltbp3,…
MP:0013848	subcutaneous edema	0.00049	0.00781	32	4421	Common	4933434E20Rik,Arid2,Atg16l1,Atp11a,Brd2,Cir1,Col4a2,Coro1c,Crim1,Cryab,Cyfip2,H13,Hmgxb3,Kif1bp,Morc2a,Myo9a,Npat,Nsun2,Pcbp2,Plau,Polb,Prmt7,Rpgrip1l,Setd5,Sh3pxd2a,Slc20a2,Smg9,Ssr2,Tent5c,Traf6,Unk,Xpnpep1
MP:0001658	increased mortality induced by gamma-irradiation	0.000509	0.00807	22	4421	Common	Atm,Ccng1,Cops6,Hmgn1,Ing1,Kcnj8,Kmt2a,Kmt2e,Mcph1,Mre11a,Nabp2,Nbn,Parg,Parp1,Parp2,Per2,Prkdc,Rpl27a,Trp53,Trp53bp1,Uimc1,Usp1
MP:0004001	decreased hepatocyte proliferation	0.000509	0.00807	22	4421	Common	Adamts7,C3,Cav1,Ccdc134,Ccndbp1,Cdk2,Cdkn1a,Cul4a,Ercc1,Fah,Hgf,Hif1a,Il6ra,Jun,Nfe2l2,Rad50,Sel1l,Slc20a1,Slc39a14,Sptbn1,Stat3,Xbp1
MP:0013021	abnormal Ly6C high monocyte number	0.000509	0.00807	22	4421	Common	4933434E20Rik,Acbd5,Agap1,Arhgap22,Arhgef1,Clpp,Cog6,Col4a3bp,Dcbld2,Galnt18,Gmds,Hbs1l,Medag,Myo10,Oaf,Sap130,Setd5,Slu7,Tead3,Tmem127,Usp5,Zfp408
MP:0004893	decreased adiponectin level	0.000518	0.0082	30	4421	Common	Adipoq,Atm,Bscl2,Cav1,Ccl2,Cd36,Ces1d,Fam213a,Fosl2,Fto,Ghr,Igf1r,Kbtbd2,Lipe,Lnpep,Mark2,Ncoa3,Nos2,Nos3,Pla2g16,Plscr3,Pparg,Prdx3,Ptpn11,Rictor,Rptor,Sik2,Stat3,Tbc1d4,Ucp2
MP:0002109	abnormal limb morphology	0.00052	0.00822	371	4421	Common	2700049A03Rik,Acan,Acsl4,Acvr1,Adam17,Adamts5,Adamts6,Adamts9,Adgrf5,Agl,Akap11,Aktip,Alkbh1,Ank,Ankib1,Ankrd27,Ano6,Anxa3,Ap4e1,Apaf1,Apc,Arid5b,Ascc2,Ascc3,Aspn,Atad2b,Atf2,Atp2b1,Atp6v0d1,Atp7a,Atxn7l3,Axin1,Bahd1,Bclaf1,Bgn,Bmp4,Bmper,Bmpr1a,Bmpr1b,Bnip2,Brd7,C2cd3,Cap2,Casc3,Cast,Cc2d2a,Cd44,Cd47,Cdc42,Cdo1,Chd2,Chd7,Chsy1,Chuk,Clec16a,Col12a1,Col1a2,Col27a1,Col4a2,Col4a3bp,Cplane1,Cpox,Creb…
MP:0002356	abnormal spleen red pulp morphology	0.000527	0.00831	75	4421	Common	Abcc10,Abcc4,Adam10,Adam17,Ahr,Akap12,Asl,B3gnt5,Bcl3,Bmi1,Bnip3l,Cbl,Cd200,Cdk6,Cebpb,Cflar,Chd2,Cpox,Csf1,Csnk1a1,Cul4a,Dhx36,Dkc1,Ep300,Epb41,Ets1,Ezh1,Fads2,Gba,Hip1,Hk1,Ikzf1,Irf8,Itgb2,Jak2,Kmt2a,Lamp2,Lyn,Man2b1,Mitf,Nabp2,Ncoa3,Ncstn,Nfkb2,Pcid2,Pfdn1,Pgm3,Phf20,Prkab1,Prkag1,Procr,Psmb10,Ptpn11,Ptpn2,Ptprc,Rassf2,Rbl1,Rbm15,Ripk1,Runx1,Sh3bp2,Slc11a2,Slc20a1,Sos1,Spi1,Steap3,Stim1,Tet2,T…
MP:0000876	Purkinje cell degeneration	0.000532	0.00836	44	4421	Common	Aars,Aff1,Aga,Agtpbp1,Aifm1,Ank3,Arcn1,Arsa,Atg5,Atg7,Atm,Chp1,Glb1,Gnptab,Herc1,Hexb,Hsd17b4,Inpp4a,Ireb2,Map1a,Mfn2,Naglu,Ndufs4,Npc1,Npc2,Ppt1,Prnp,Psap,Pten,Qk,Reln,Sacs,Sil1,Slc9a1,Slc9a6,Spg11,Tbp,Tpp1,Tsc2,Ube4b,Ugcg,Usp14,Vim,Zfyve26
MP:0010365	increased thymus tumor incidence	0.000532	0.00836	44	4421	Common	Atad5,Atm,Brca2,Cdkn1a,Cdkn2c,Chd2,Cop1,Crebbp,Egr1,Fbxw7,Hace1,Hip1,Id1,Ikzf1,Map3k8,Mcm4,Mlh1,Msh2,Mtf1,Nabp2,Nbn,Ndrg1,Ndrg2,Notch3,Pim1,Pms2,Prdx1,Prkdc,Pten,Ptpn11,Rad50,Rc3h1,Runx1,Skil,Smarcb1,Spi1,Srpx,Tgfbr2,Trp53,Trp53bp1,Trp53bp2,Uimc1,Xrcc6,Zeb1
MP:0008189	increased transitional stage B cell number	0.00054	0.00843	24	4421	Common	Adam10,Akap13,Arhgap17,Bax,Cd36,Eps15,Fas,Fli1,Irf8,Lama5,Nfkb2,Notch2,Pepd,Plcg2,Ppp2r3c,Prkcd,Ptpn22,Ptprc,Tnfsf13b,Traf3,Traf3ip2,Vav1,Vcam1,Zfp365
MP:0010090	increased circulating creatine kinase level	0.00054	0.00843	24	4421	Common	Agl,Ano10,Col4a1,Dag1,Dmd,Dysf,Epb41,Epc1,Fkrp,Gbe1,Ghr,Hif1a,Hspb7,Itga7,Large1,Lmna,Mpv17,Nos3,Pik3r4,Sgcd,Sgcg,Sync,Zdhhc13,Zmpste24
MP:0020280	increased creatine kinase level	0.00054	0.00843	24	4421	Common	Agl,Ano10,Col4a1,Dag1,Dmd,Dysf,Epb41,Epc1,Fkrp,Gbe1,Ghr,Hif1a,Hspb7,Itga7,Large1,Lmna,Mpv17,Nos3,Pik3r4,Sgcd,Sgcg,Sync,Zdhhc13,Zmpste24
MP:0002833	increased heart weight	0.000566	0.00882	117	4421	Common	Abcb8,Abcc9,Abhd5,Acadvl,Ace,Acsl5,Adam17,Ahr,Akap6,Ankrd26,Ap4e1,Ate1,Atg5,Atp1a2,Atp1b1,Atp2a2,Bag3,Cacna1c,Cacnb3,Capn1,Cavin1,Ccnd2,Ccnd3,Cdkn1b,Clcn3,Cnot3,Ctsl,Dbn1,Dcbld2,Des,Dusp6,Egln1,Emd,Epas1,F2r,Fabp3,Fstl1,Fxyd1,Gas2l3,Gla,Gnaq,Gpi1,Grb14,Gys1,Hdac3,Hif1a,Hmox1,Hprt,Igf1r,Igf2r,Ino80,Itch,Itgb3,Jup,Kcnmb1,Klf3,Lamp2,Ldha,Lmna,Lrp1,Map2k1,Mapk14,Mecp2,Mtmr12,Mto1,Mtpn,Mtus1,Myo6,Nae1…
MP:0000715	decreased thymocyte number	0.000574	0.00894	99	4421	Common	Apc,Apex2,Atm,Atr,Bcl10,Bcl2l1,Bmi1,Braf,Cacybp,Caml,Casp3,Cdk6,Cops5,Coro1a,Crebbp,Cux1,Cxcr4,Dicer1,Dll4,Dmtf1,Drosha,Dyrk1a,E2f4,Elk4,Ep300,Esr1,Ets1,Ezh2,Fli1,Fos,Fyb,Gabpa,Grb2,Hax1,Id3,Igbp1,Ikzf1,Il6st,Il7r,Ing1,Inpp5d,Jak1,Kifap3,Kitl,Kmt2e,Lcp2,Maml1,Map3k3,Mcl1,Mcm4,Msi2,Mtor,Ncaph2,Nfatc3,Nfkbia,Nkap,Nlk,Noc2l,Notch3,Ogt,Otud5,Patz1,Phf20,Pik3cg,Ppp3r1,Prkch,Prkdc,Prnp,Ptpn2,Ptpn6,Ptpr…
MP:0005404	abnormal axon morphology	0.000586	0.00911	110	4421	Common	Adgrg6,Aga,Als2,Ank2,Ank3,App,Arsa,Atg5,Bace1,Basp1,C1qa,Cadps,Canx,Cd47,Cd86,Cdc42,Cers2,Chp1,Clcn6,Cnp,Cyth1,Dag1,Dclk1,Dlg3,Dst,Efnb1,Efnb2,Ei24,Eif2b5,Epb41l3,Ephb3,Erbb2,Erbin,Fgd4,Fig4,Gabbr1,Galc,Gars,Gldn,Gnpat,Hmbs,Hspa5,Hspg2,Htt,Ireb2,Itga6,Itgb4,Kidins220,Kif2a,Klc1,Lama4,Lmna,Lmnb1,Lpin1,Lrrk2,Man2b1,Map1a,Map1b,Mbp,Mfn2,Mtor,Ncstn,Nefl,Nefm,Nf2,Nfe2l2,Npc1,Nrd1,Ntrk2,Pex5,Pi4k2a,Ple…
MP:0000063	decreased bone mineral density	0.0006	0.0093	162	4421	Common	Acp2,Acsl5,Adam8,Adgrd1,Adgrf5,Adipoq,Aktip,Aldh2,Ankrd11,Arhgap1,Aspa,Atp2b1,Atxn10,Bbx,Boc,Brpf1,Casp3,Cast,Cd68,Cdo1,Chd2,Chn1,Chsy1,Cisd2,Clpp,Cnot3,Col14a1,Col1a2,Creb3l1,Ctgf,Ctns,Cul7,Ddx10,Def6,Degs1,Dkk2,Dolk,Ebf2,Efemp1,Egr1,Eif4g2,Elk4,Enpp1,Ercc1,Esr1,Eya3,Fam20c,Fblim1,Fbn1,Fermt2,Fgfr2,Flnb,Fosl2,Foxo3,Fto,Galc,Gba,Ghr,Gja1,Gli3,Gnptab,Gse1,Hbs1l,Hdac8,Hectd3,Ibsp,Id1,Ifnar1,Inpp5d,…
MP:0005202	lethargy	0.0006	0.0093	76	4421	Common	Abca3,Acadvl,Aifm1,Apc,App,Aqp1,Asah1,Asl,Aspa,Asxl2,Atp2a2,Atp7a,Atxn1l,Bicc1,Btd,Cc2d2a,Chd2,Cisd2,Cpe,Dbt,Des,Dnajc5,Epha3,F5,Gak,Golm1,Hdac2,Hexb,Hmgb1,Hmgcl,Hsd17b4,Htra2,Inppl1,Iqce,Jag1,Jam3,Kif3a,Lama4,Lamb2,Lrig2,Lrrk1,Map1b,Map3k7,Mcoln1,Mecp2,Mn1,Mtpn,Ndufs4,Nfkb1,Notch3,Nphp3,Nt5e,Oat,Pikfyve,Pou2f2,Ppp1r3b,Prnp,Pten,Ptger4,Rab27a,Rb1,Rce1,Ryr2,Sirt1,Slc6a9,Smo,Srf,Tgfbr2,Timp3,Tpm1,T…
MP:0006043	decreased apoptosis	0.000601	0.0093	114	4421	Common	Acp1,Aifm1,Apaf1,Bach1,Bag6,Bax,Bcl3,Bid,Birc3,Bnip3,Bnip3l,Camk2d,Camk2g,Casp3,Casp4,Casp7,Casp8,Casp9,Ccdc80,Ccl2,Cd274,Cd44,Cdk6,Cnbp,Ctsb,Cxcr4,Cyr61,Dap3,Dapk1,Def6,Dnm1l,Eef1e1,Eef2k,Egln1,Elavl1,Ero1l,Ets1,Fah,Fam20c,Fas,Fcgr2b,Fos,Foxo1,Foxo3,Hif1a,Hipk2,Hyou1,Ikbkb,Inpp5d,Itgam,Jun,Lcp2,Lum,Maged1,Maob,Map2k1,Map2k3,Map3k12,Map3k6,Mapk8,Mapk8ip1,Mapk9,Mapkapk2,Mcu,Mdm4,Mtor,Ncoa3,Ndrg1,N…
MP:0000433	microcephaly	0.000604	0.00932	58	4421	Common	Acvrl1,Apaf1,Arhgef2,Arid1a,Aspm,Atr,Bcor,Bnc2,Cask,Cdk5rap2,Cep63,Chrd,Ctnnb1,Dctn5,Ddx3x,Dyrk1a,Eng,Evc2,Eya1,Foxn3,Gja1,Huwe1,Itgav,Lias,Lig3,Lmnb1,Map3k3,Map3k7,Marcks,Mcph1,Med1,Mthfd1l,Nipbl,Otulin,Pcnt,Pdcd10,Pds5b,Pex2,Phgdh,Prickle1,Prrx1,Ptpn11,Ptprj,Rbm8a,Ryk,Slc25a19,Smad2,Smarca4,Smoc1,Smurf2,Ssbp3,Tcf4,Tcof1,Tgif1,Tmem67,Tubb5,Wdr11,Xpnpep1
MP:0011156	abnormal hypodermis fat layer morphology	0.000612	0.00941	73	4421	Common	Acacb,Angptl2,Ap1s2,Arhgap1,Arhgap5,Atf3,Atm,Atr,B4galt1,Bag3,Bscl2,C1qtnf1,Cav1,Ccdc3,Cdc73,Cdk7,Cdkal1,Chd2,Cisd2,Cnot3,Col5a3,Cxcr4,Dgat2,Dhcr24,Ebf1,Efemp1,Ercc1,Fabp5,Fbn1,Fmo5,Gabbr1,Ghr,Hsd11b1,Lbr,Lipa,Lipe,Lmna,Lztfl1,Mapk8,Mbd5,Mcat,Mcoln1,Memo1,Mmp14,Mpv17,Npy1r,Odc1,Osmr,Pdgfrb,Phf2,Plin2,Ppard,Pparg,Ppp6c,Psmb10,Ptpn11,Samd4,Serpine1,Sh3kbp1,Sh3pxd2b,Sik3,Smtn,Sqstm1,Ssfa2,Steap4,Sup…
MP:0013504	increased embryonic tissue cell apoptosis	0.000612	0.00941	73	4421	Common	Adar,Aifm1,Becn1,Bmp4,Bmpr1a,Brd2,Cdk11b,Cdk7,Chd8,Clpp,Cops5,Ctcf,Ctnnb1,Cul4b,Dad1,Daxx,Ddx3x,Dhx9,Dido1,Dnmt1,Efnb2,Eloa,Eya1,Fbxl5,G6pdx,Gata6,Gclc,Hand2,Hif1a,Htt,Hus1,Kat2a,Kat7,Kdm2a,Kdm2b,Lemd3,Mapk14,Mdm4,Meis2,Mga,Mpi,Nabp2,Notch2,Npm1,Osr1,Paxip1,Pkn2,Polb,Prickle1,Rac1,Raf1,Rest,Rev3l,Rheb,Rnaseh1,Slk,Smg1,Sox9,Stip1,Suz12,Thoc1,Tjp1,Tjp2,Topbp1,Tpt1,Ubr2,Ubr5,Ugcg,Usp36,Vegfa,Vps41,W…
MP:0006083	abnormal blood vessel elastic tissue morphology	0.000624	0.00955	17	4421	Common	Acadm,Acta2,Atp7a,Col3a1,Ctsa,Des,Emilin1,Fbln5,Fbn1,Lox,Lrp1,Mgp,Poldip2,Slc2a10,Tgfbr1,Tgfbr2,Timp3
MP:0008114	abnormal Kupffer cell morphology	0.000624	0.00955	17	4421	Common	Ccr1,Ccr5,Cp,Csf1,Ctbs,Fmnl1,Glmp,Hgsnat,Lipa,Man2b1,Manba,Naglu,Neu1,Prkag1,Rfx5,Uaca,Zdhhc13
MP:0014021	heterochrony	0.000624	0.00955	17	4421	Common	4933434E20Rik,Atp11a,Brd2,Cir1,Col4a2,Col4a3bp,Coro1c,H13,Morc2a,Prmt7,Rpgrip1l,Sh3pxd2a,Smg9,Ssr2,Tcf7l2,Trappc9,Zmynd11
MP:0000738	impaired muscle contractility	0.000633	0.00968	176	4421	Common	Aars,Abcb8,Abcc9,Abhd5,Acadvl,Acta2,Adam17,Adcy6,Adipoq,Adm,Aifm1,Akap13,Arhgef1,Arhgef12,Ate1,Atp1a1,Atp1a2,Atp1b1,Atp2a2,Atp2b4,Atp6ap2,Bag3,Bcar1,Bmpr1a,Cacna1c,Cacna2d1,Cap2,Capn1,Capns1,Cast,Cav1,Cavin1,Cdc42,Cdh2,Cisd2,Clcn3,Clip3,Clu,Cnot1,Cnot3,Col4a3bp,Col6a1,Col6a3,Crem,Cryab,Ctsl,Ddr2,Des,Dicer1,Dlg1,Dmd,Dnaja3,Dnm1l,Dst,Dusp6,Efna1,Egfr,Egln1,Emd,Entpd1,Ep300,Erbb2,Foxj3,Fstl1,Gas2l3,…
MP:0009489	abnormal blood vessel endothelium morphology	0.000636	0.00969	50	4421	Common	Adam19,Adm,Amotl2,Braf,Cav1,Cavin1,Cavin2,Ccm2,Cd44,Cdh5,Clic4,Col15a1,Crebbp,Crim1,Ctnnb1,Fas,Fbln1,Fli1,Flna,Flt1,Gata2,Git1,Hdac7,Itgb8,Lama5,Ldb1,Magi2,Mapk7,Metap2,Nos3,Notch2,Pdgfb,Pdgfrb,Plekhg5,Plvap,Psap,Psen1,Ptk2,Ptpn12,Ptprj,Qk,Reck,Rrm2b,S1pr1,Selp,Shc1,Smad5,Tek,Tie1,Vegfa
MP:0008553	increased circulating tumor necrosis factor level	0.000672	0.0102	53	4421	Common	Apc,Ash1l,Brd2,Cav1,Ccl2,Cd44,Dnase2a,Dusp1,Egfr,Elavl1,Fos,Hck,Hmgb1,Hmox1,Hnrnpd,Il10ra,Il6ra,Itgal,Lgmn,Lyn,Map3k7,Mavs,Mertk,Myd88,Ncoa3,Nfe2l2,Nfil3,Nfkbia,Osmr,Parg,Psmb10,Rab27a,Rc3h1,Rnf146,Rpl13a,Senp1,Sh3bp2,Sirt3,Sod1,Stat3,Stat6,Stk38,Tbc1d23,Tbk1,Tnfaip3,Tnfaip8l2,Tnfrsf1a,Tnfrsf1b,Trp53,Unc93b1,Wwp2,Zc3h12a,Zfp36
MP:0000111	cleft palate	0.00068	0.0103	139	4421	Common	Acan,Acvr1,Acvr2a,Adamts6,Adgra2,Ap2b1,Apaf1,Arhgap29,Bmp4,Bmpr1a,Bnc2,Cask,Casp3,Cc2d2a,Cdc42,Chd7,Chrd,Chuk,Ckap5,Cplane1,Cramp1l,Crebbp,Crk,Ctgf,Ctnnb1,Cyp51,Ddx10,Dhrs3,Dlg1,Dnm2,Edn1,Ednrb,Efnb1,Efnb2,Egfr,Ermp1,Ext1,Eya1,Fbxo11,Fbxw7,Fgfr1,Fgfr2,Flna,Foxn3,Fst,Fuz,Fzd2,Gab1,Glg1,Gli3,Golgb1,Grb2,Gsk3b,Gskip,Hand2,Hs2st1,Hspa5,Hspg2,Ick,Ift140,Ift172,Ift88,Impad1,Inhba,Itgav,Itgb1,Itgb8,Jmjd…
MP:0004003	abnormal vascular endothelial cell physiology	0.00069	0.0105	33	4421	Common	Adamts7,Adipoq,Aggf1,Anxa1,Atp2a2,Atp2a3,Bmp4,Cd44,Clic4,Cpt1a,Ctss,Cttn,Ecscr,Entpd1,Erg,Esr1,Flna,Git1,Hif1a,Id1,Ifngr1,Igf1r,Krit1,Nos3,P2rx4,Podxl,Pparg,Ptafr,Rac2,Rcan1,Rock1,S1pr1,Slc4a7
MP:0005437	abnormal glycogen level	0.000697	0.0106	74	4421	Common	Abcg2,Acacb,Acadvl,Agl,Blvra,Cav1,Cd36,Crebbp,Crtc2,Dgat2,Dnajb9,Dnajc15,Eif2ak3,Fabp3,Fnip1,Foxo1,Fstl1,Gab1,Gak,Gbe1,Grb10,Gsk3a,Gsk3b,Gys1,H6pd,Hccs,Hdac3,Hif1a,Hsd11b1,Il6ra,Il6st,Insr,Klf15,Lamp2,Lifr,Lipe,Lmna,Lpin1,Map3k7,Mark3,Mcat,Mlxipl,Mtor,Ncoa3,Ncor1,Nos2,Npy1r,Nuak1,Osmr,Pcca,Pdk4,Pfkfb3,Pfkm,Phka1,Pik3c3,Pik3cb,Pik3r4,Plau,Ppard,Ppp1r3c,Prkab2,Prkag2,Pten,Ptpn11,Rps6ka3,Rptor,Samd4…
MP:0010877	abnormal trabecular bone volume	0.000714	0.0108	59	4421	Common	Adipoq,Ank,Cd47,Chsy1,Ciita,Csf1,Ctnnb1,Ctsk,Evc2,F2r,Fam20c,Farp2,Fermt2,Fig4,Gnptab,Gpr65,Gsk3b,Ibsp,Igf1r,Inpp5d,Irak3,Itgb3,Jdp2,Kitl,Klf10,Lrrk1,Mcph1,Nbr1,Ncor2,Notch2,P3h1,P3h4,Pdia3,Pdk4,Plcg2,Plekhm1,Postn,Pparg,Ppib,Prdm5,Ptpn2,Rassf2,Rnf146,Serpinf1,Sfrp4,Sh3bp2,Slc39a14,Smad1,Socs2,Sost,Spon1,Stat1,Thra,Tmem119,Tmem64,Tnfrsf11a,Twsg1,Tyrobp,Xylt1
MP:0010293	increased integument system tumor incidence	0.00072	0.0109	68	4421	Common	Apc,Atf2,Atp2a2,Atp2c1,Bap1,Becn1,Bin1,Braf,Brca2,Cav1,Cd34,Cdc37,Cdk11b,Cdkn1a,Cdkn2c,Chuk,Ctnnb1,Cyld,Dicer1,Dkc1,Egr1,Erbb2,Errfi1,Esr1,Ets2,Etv6,Fbxo4,Fgfr2,Fyn,Gpx7,Hgf,Mcm4,Met,Mlh1,Mnt,Msh2,Msh6,Nbn,Ndrg2,Nf2,Notch4,Nqo2,Odc1,Pik3ca,Polh,Ppard,Prdx1,Prkar1a,Prkca,Prkch,Pten,Ptgs2,Rev3l,Rint1,S100a4,Sirt2,Smad4,Smarca4,Smarcb1,Smo,Stat1,Stk3,Tnfrsf1a,Tnfrsf1b,Tom1l2,Trp53,Tsc2,Tsg101
MP:0001836	abnormal antigen presentation via MHC class I	0.000723	0.0109	11	4421	Common	B2m,Erap1,Nup98,Prkdc,Psmb8,Stat1,Tap1,Tap2,Tapbp,Tpp2,Unc93b1
MP:0004266	pale placenta	0.000723	0.0109	11	4421	Common	Alkbh1,Capn2,Ccm2,Cul4b,Cyr61,Fgfrl1,Ggnbp2,Itgb3,Met,Pak4,Slc20a1
MP:0001916	intracerebral hemorrhage	0.000747	0.0112	31	4421	Common	Adgra2,Anxa7,Apaf1,App,Birc6,Braf,Casp9,Ccm2,Cog6,Col4a1,Commd9,Ddb1,F3,Fbln1,Fli1,Hsf2,Itgav,Itgb8,Jam3,Llgl1,Mapk7,Morc2a,Notch4,Plat,Psen1,Rala,Rhbdf1,Runx1,Ssr2,Syk,Ube4b
MP:0011635	abnormal mitochondrial crista morphology	0.000747	0.0112	31	4421	Common	Abcg2,Acad8,Adgrg6,Aifm1,Cd44,Cisd2,Clec16a,Clpp,Dnajc11,Hdac3,Hgsnat,Hprt,Hspd1,Htra2,Lrrk2,Mpv17,Mut,Ndufs4,Opa1,Pex13,Pex5,Phc1,Pnpt1,Rnaseh1,Sod1,Sod2,Sqstm1,Tfam,Tk2,Vcp,Wdr81
MP:0003628	abnormal leukocyte adhesion	0.000758	0.0113	38	4421	Common	Adam17,Anxa8,Arhgap25,B4gat1,Capn1,Ccr1,Ccr5,Cd44,Cttn,Edil3,F3,Fas,Fyb,Galnt1,Gcnt1,Glg1,Gnai2,Icam1,Itga4,Itgal,Itgam,Itgb2,Itgb7,Jam3,Myh9,Ndst1,Nfe2l2,Ninj1,Nos3,Rap1a,Rock1,Selp,Slc35c1,St3gal4,St3gal6,Stk4,Vegfa,Vim
MP:0008476	increased spleen red pulp amount	0.000758	0.0113	38	4421	Common	Adam10,Adam17,Akap12,Asl,Bnip3l,Cbl,Cd200,Chd2,Cpox,Epb41,Fads2,Hip1,Hk1,Irf8,Jak2,Kmt2a,Nabp2,Ncstn,Nfkb2,Pgm3,Prkab1,Prkag1,Procr,Ptpn2,Ptprc,Rbm15,Ripk1,Runx1,Sh3bp2,Slc11a2,Sos1,Stim1,Tet2,Tnip1,Tpp2,Ttc7,Uros,Wipf1
MP:0000880	decreased Purkinje cell number	0.000763	0.0113	43	4421	Common	Agtpbp1,Als2,Ank3,Arcn1,Atf2,Atxn1,B4galt2,Bmi1,Braf,Dnm1l,Ebf2,Egfr,Ei24,Fbxw7,Fmr1,Fzd4,Gba,Herc1,Ireb2,Ldb1,Lyst,Naglu,Npc1,Npc2,Numb,Pdha1,Pfdn5,Phyh,Pi4k2a,Pnpla6,Prnp,Psap,Pten,Pura,Reln,Smad4,Stxbp1,Sumf1,Thrb,Vim,Vps18,Wdr81,Zfp423
MP:0001719	absent vitelline blood vessels	0.000763	0.0113	43	4421	Common	Acvrl1,Arnt,Bmpr2,Ccm2,Cdh5,Crebbp,Csk,Ctbp2,Dicer1,Dll4,Eng,Enpp2,Erbb2,Ets2,Etv6,F2r,F3,Fn1,Foxo1,Furin,Gata2,Gna13,Hsd17b12,Hsd17b7,Kdr,Mapk7,Mib1,Mpi,Myocd,Npm1,Osr1,Pkn2,Plpp3,Ppp3r1,Ptk2,Raf1,Rapgef2,Rbpj,Smad5,Tgfb1,Tgfbr1,Tgfbr2,Ubp1
MP:0008284	abnormal hippocampus pyramidal cell layer	0.000763	0.0113	43	4421	Common	Aldh2,Arpc3,Atg7,Atrx,Bicd2,Brpf1,C1qa,Cadps,Cd81,Ckap5,Clcn3,Cln3,Csf1,Ctnnd1,Dlg4,Dpysl3,Ehmt1,Ei24,Eif4ebp2,Fmr1,Fyn,Hdac2,Ireb2,Kalrn,Lrp8,Lyst,Mecp2,Ncam1,Ndel1,Pten,Rac1,Reln,Scyl2,Spg11,Ssb,Stam,Top2b,Tsc2,Tuba1a,Usp14,Ywhae,Ywhaz,Zbtb18
MP:0002362	abnormal spleen marginal zone morphology	0.000769	0.0114	78	4421	Common	Ackr3,Adam10,Adpgk,Arhgef1,B3gnt5,Bcl10,Bcl3,Birc3,Blnk,Casp8,Cd22,Cd72,Cflar,Cog6,Cyld,Dock10,Dock2,Dock8,Ebf1,Ep300,Eps15,Fas,Fli1,Fnip1,Git2,H2-Ab1,Hax1,Huwe1,Ikbkb,Inpp5d,Irf8,Kdelr1,Lama5,Ltbr,Lyn,Magt1,Maml1,Map3k14,Mtor,Nedd9,Nfkb1,Nfkb2,Nfkbia,Notch2,Npy1r,Parp14,Pcid2,Pnp,Prkcd,Pten,Ptpn2,Ptpn6,Ptprj,Rbpj,Rgs1,Rnf10,Rras2,Sash3,Sgpl1,Sh3bp2,Siglec1,Slc25a28,Spen,Sppl2a,Srf,St6gal1,Stk4,T…
MP:0003797	abnormal compact bone morphology	0.000772	0.0114	95	4421	Common	Acp2,Adam17,Adipoq,Akr1a1,Ank,Ankrd11,Arhgap1,Atr,Bgn,Cav1,Cnot3,Col12a1,Col1a2,Creb3l1,Csf1,Csf1r,Ctns,Ctsk,Depdc5,Dicer1,Ebf2,Eif2ak3,Esr1,F2r,Fam20c,Fermt2,Fig4,Flnb,Fos,Frzb,Gab2,Galc,Ghr,Gnptab,Gsk3b,Gsn,Hivep3,Hspg2,Ibsp,Ifngr1,Il6st,Inpp5d,Irak3,Irs1,Itgb3,Jak1,Jak2,Kitl,Klf10,Lmna,Lrrk1,Mgp,Mmp2,Ncor2,Nf1,Nfix,Nos2,Nos3,Notch2,Nov,Ostm1,P3h4,Pdia3,Postn,Ppard,Ppib,Prdm5,Rnf146,Rrm2b,Samd4…
MP:0011131	abnormal lung endothelial cell physiology	0.000779	0.0115	14	4421	Common	Aggf1,Aimp1,Bmpr2,Cav1,Cttn,Dcbld2,Id1,Mcu,Mcur1,Pecam1,Podxl,Psen2,Pten,S100a1
MP:0013969	reduced sympathetic cervical ganglion size	0.000779	0.0115	14	4421	Common	4933434E20Rik,Atp11a,Brd2,H13,Morc2a,Myo9a,Npat,Nsun2,Polb,Rala,Setd5,Sh3pxd2a,Smg9,Ssr2
MP:0004982	abnormal osteoclast morphology	0.000785	0.0116	106	4421	Common	Adam8,Adipoq,Akr1a1,Ank,Ankrd11,Atp2a2,Atp6v0d2,Atp6v1h,Bmpr1a,C3,C3ar1,C5ar1,Cav1,Ccl2,Cd44,Cd47,Cd68,Cebpb,Ciita,Cnot3,Csf1,Csf1r,Ctnnb1,Ctsk,Ctsl,Dkk2,Ebf1,Egr1,Esr1,Farp2,Fblim1,Fcgr4,Fgfr2,Fos,Fosl2,Gab2,Gnptab,Gsn,Hivep3,Hspg2,Ibsp,Id1,Ifnar1,Ifngr1,Igf1r,Il6st,Inpp5d,Irak3,Irs1,Itgb3,Jdp2,Kitl,Lifr,Limd1,Lrrk1,Mitf,Mmp2,Ncor2,Nf1,Nfatc1,Nfkb1,Nfkb2,Nos2,Notch2,Nov,Npr3,P2rx7,Pdk4,Pex7,Plcg…
MP:0006346	small pharyngeal arch	0.000799	0.0118	29	4421	Common	Adam10,Akap13,Aph1a,Baz1b,Cdh5,Ctnnb1,Edn1,Ednra,Efnb2,Fgfr1,Foxo1,Gtf2i,Gtf2ird1,Hand2,Hif1a,Itgav,Itgb1,Kcnh2,Kif3a,Lemd2,Mapk7,Otulin,Rere,Setd2,Tcof1,Tdg,Twsg1,Ubr5,Vegfa
MP:0000297	abnormal atrioventricular cushion morphology	0.000805	0.0118	54	4421	Common	4933434E20Rik,Ackr3,Acvr1,Acvrl1,Adam19,Bmp4,Bmpr1a,Braf,Ccm2,Chd7,Cir1,Col4a2,Cyr61,Ece1,Ehmt1,Epha3,Erbb2,Flna,Fn1,Foxp1,Gja5,Hand2,Ikbkap,Invs,Jup,Klf3,Map2k5,Morc2a,Nf1,Nfatc1,Nov,Npat,Pepd,Ptpn11,Ptprj,Rbpj,Rpgrip1l,Senp2,Sh3pxd2a,Shc1,Shoc2,Slc20a2,Smad4,Smad7,Smarca4,Smg9,Sox9,Tbx2,Tgfb2,Trp53,Ubr4,Vcan,Vcl,Zfpm2
MP:0000134	abnormal compact bone thickness	0.00081	0.0119	72	4421	Common	Adam17,Adipoq,Akr1a1,Ank,Arhgap1,Atr,Bgn,Cnot3,Col1a2,Creb3l1,Csf1,Csf1r,Ctns,Depdc5,Ebf2,Eif2ak3,Esr1,F2r,Fam20c,Fermt2,Fig4,Flnb,Fos,Frzb,Galc,Gsk3b,Gsn,Hivep3,Hspg2,Ibsp,Ifngr1,Il6st,Inpp5d,Irak3,Irs1,Itgb3,Jak2,Kitl,Klf10,Lmna,Lrrk1,Ncor2,Nfix,Nos3,Notch2,Nov,P3h4,Ppib,Rnf146,Samd4,Sfrp4,Sh3bp2,Slc30a5,Slc39a13,Slc39a14,Smad4,Smurf1,Snx10,Sost,Spon1,Src,Stat1,Suco,Tent5a,Thbs2,Thra,Thrb,Tle4,…
MP:0012555	decreased cell death	0.000819	0.012	114	4421	Common	Acp1,Aifm1,Apaf1,Bach1,Bag6,Bax,Bcl3,Bid,Birc3,Bnip3,Bnip3l,Camk2d,Camk2g,Casp3,Casp4,Casp7,Casp8,Casp9,Ccdc80,Ccl2,Cd274,Cd44,Cdk6,Cnbp,Ctsb,Cxcr4,Cyr61,Dap3,Dapk1,Def6,Dnm1l,Eef1e1,Eef2k,Egln1,Elavl1,Ero1l,Ets1,Fah,Fam20c,Fas,Fcgr2b,Fos,Foxo1,Foxo3,Hif1a,Hipk2,Hyou1,Ikbkb,Inpp5d,Itgam,Jun,Lcp2,Lum,Maged1,Maob,Map2k1,Map2k3,Map3k12,Map3k6,Mapk8,Mapk8ip1,Mapk9,Mapkapk2,Mcu,Mdm4,Mtor,Ncoa3,Ndrg1,N…
MP:0005065	abnormal neutrophil morphology	0.000823	0.012	172	4421	Common	Adam10,Adam17,Akna,Ankrd27,Arhgap15,Arhgap25,Arid4a,Asah1,B4galt1,Bag3,Bap1,Bcor,Bcr,Btk,C3,C3ar1,C4b,C9orf72,Ccl2,Cd47,Cd59a,Cdh5,Cerk,Cflar,Chst3,Ciz1,Cmklr1,Col4a3bp,Coro1a,Ctnnb1,Cul4a,Cxcl12,Cxcr4,Dennd4c,Diaph1,Dicer1,Dock2,Dyrk1b,Eftud2,Egr1,Ehmt1,Eif3h,Etv6,F3,Fas,Fastk,G6pc3,Galnt18,Gcnt1,Git2,Gmds,Gnai2,Gpr65,Gsn,Hax1,Hnrnpd,Icam1,Id1,Ier3,Ifi204,Il17ra,Il1r1,Il6st,Inpp5d,Irak3,Irf5,Irf…
MP:0006107	abnormal fetal atrioventricular canal morphology	0.000826	0.012	57	4421	Common	4933434E20Rik,Ackr3,Acvr1,Acvrl1,Adam19,Bmp4,Bmpr1a,Braf,Ccm2,Chd7,Cir1,Col4a2,Cyr61,Ece1,Ehmt1,Epha3,Erbb2,Flna,Fn1,Foxp1,Gja5,Hand2,Ikbkap,Invs,Jup,Klf3,Map2k5,Morc2a,Nf1,Nfatc1,Nov,Npat,Osr1,Pepd,Ptpn11,Ptprj,Rbpj,Rpgrip1l,Senp2,Sh3pxd2a,Shc1,Shoc2,Slc20a2,Smad4,Smad7,Smarca4,Smg9,Sox9,Srf,Tbx2,Tgfb2,Tmod1,Trp53,Ubr4,Vcan,Vcl,Zfpm2
MP:0008396	abnormal osteoclast differentiation	0.000826	0.012	57	4421	Common	Adam8,Ank,Atp2a2,Atp6v0d2,Atp6v1h,Bmpr1a,Cd44,Cd47,Cebpb,Cnot3,Csf1,Csf1r,Ctnnb1,Ctsk,Dkk2,Fblim1,Fgfr2,Fos,Fosl2,Gab2,Gsn,Hivep3,Id1,Ifngr1,Il6st,Inpp5d,Irs1,Itgb3,Jdp2,Nfatc1,Nfkb2,Nos2,Notch2,Nov,Pdk4,Plcg2,Pparg,Ptger4,Ptgs2,Ptpn2,Rassf2,Rgs10,Rnf146,Sh3bp2,Sqstm1,Stat1,Syk,Tlr4,Tmem64,Tnfrsf11a,Tnfrsf11b,Tob2,Traf6,Tyrobp,Vcp,Was,Xylt1
MP:0002192	hydrops fetalis	0.000835	0.0121	46	4421	Common	Adamts6,Adm,Arf6,Bmp4,Calcrl,Cdk4,Chrd,Cop1,Cplane1,Crk,Cxcr4,Dock1,Dpf2,Ece1,Fam49b,Flt4,Foxp1,Fzd4,Ggnbp2,Ift140,Igf1r,Laptm4b,Nf1,Npr1,Osr1,Pcnt,Pdgfra,Pdgfrb,Pkd2,Podxl,Psen1,Ptpn11,Rictor,Rock1,Smarcd2,Syk,Sympk,Tab1,Tbx2,Tcf7l1,Tfrc,Tgfb3,Tmem115,Ywhaz,Zeb1,Zfpm2
MP:0005193	abnormal anterior eye segment morphology	0.000835	0.0121	244	4421	Common	4933434E20Rik,Abcd1,Acbd3,Acsl5,Adam17,Adamtsl4,Aff1,Agap1,Agl,Agps,Ahcyl1,Aif1,Aldh1a3,Alkbh1,Ank2,Anxa3,Ap3b1,Ap4e1,Apaf1,Apc,Ash1l,Aspa,Atp11a,Atp5g2,Atraid,Bcar3,Bmp2k,Bmp4,Bms1,Braf,Brd1,Brd2,Brd4,Cant1,Cap2,Casp3,Ccr5,Cd36,Cdc14b,Cdkal1,Chd7,Chuk,Cisd2,Cog3,Col4a1,Col4a2,Col4a3bp,Col5a2,Col8a1,Cotl1,Cpox,Crim1,Cryab,Csk,Cstb,Ctnnb1,Ctns,Ctsl,Cyp1b1,Cystm1,Dag1,Dcn,Dctn5,Ddb1,Dis3,Dkk2,Dlg1,…
MP:0004201	fetal growth retardation	0.000838	0.0121	60	4421	Common	Alkbh1,Anks6,Atmin,Birc6,Brca2,Brd2,Brd7,Casc3,Chd2,Col4a3bp,Crtap,Cul4b,Cul7,Dhrs3,Dlg1,Ercc1,Fgfrl1,Fst,Gab1,Ghr,Hnrnpd,Igf1,Ikbkap,Irs1,Jag1,Jarid2,Jmjd6,Maml1,Manf,Mcm4,Mitf,Nabp2,Nedd4,Nos3,Npat,Pak1ip1,Pdgfa,Pds5a,Pds5b,Picalm,Pik3ca,Psat1,Psen1,Rad23b,Ryr2,Sav1,Sc5d,Setd5,Sh3pxd2a,Sin3b,Slc43a2,Smg9,Srsf10,Ssr2,Ssr3,Stat3,Tbp,Xrcc4,Xrcc5,Zeb1
MP:0005048	abnormal thrombosis	0.00084	0.0121	63	4421	Common	Abca5,Ackr3,Ahr,Anxa2,App,Bap1,Bmpr2,Cd36,Cdc42,Cfh,Cryab,Ctsd,Dicer1,E2f3,F3,F5,Fbln5,Fbn1,Flna,Fn1,Gas2l3,Gnaq,Golm1,Hccs,Hmox1,Itgb1,Itgb3,Jup,Map3k7,Mef2d,Myh10,Myocd,Nos3,Notch3,Notch4,Nr3c1,Nt5e,P3h2,Pdgfrb,Pdlim1,Pdlim7,Phc1,Plat,Plau,Prdx6,Procr,Pros1,Ptgs2,Ptpn11,Rap1b,Rce1,Rhbdf1,Ryr2,Smad6,Stat3,Stim1,Tfpi,Tgfb1,Tln1,Tmod1,Tpm1,Wrn,Yap1
MP:0003542	abnormal vascular endothelial cell development	0.000842	0.0122	27	4421	Common	Acvr1,Adamts7,Anxa1,Atp2a2,Ccm2,Cd82,Cdh5,Crebbp,Dock1,Ecscr,Hif1a,Map2k1,Mapk7,Med1,Mef2c,Otulin,Pdcd10,Plcg1,Plxnd1,Pofut2,Ppp3r1,Ptk2,Ptk2b,Tgfb1,Tie1,Vegfa,Wasf2
MP:0000790	abnormal stratification in cerebral cortex	0.000869	0.0125	25	4421	Common	Arhgap35,Atr,Bicd2,Braf,Cdk5,Dag1,Fkrp,Fubp1,Fyn,Gli3,Hspa5,Huwe1,Kif2a,Lmnb1,Pex2,Pomgnt1,Psen1,Rbm8a,Reln,Suz12,Top2b,Trp53bp2,Usp22,Wdfy3,Zbtb18
MP:0008788	abnormal fetal cardiomyocyte morphology	0.000871	0.0125	23	4421	Common	Abcc9,Adgrg6,Daam1,Dicer1,Gas2l3,Hccs,Hexim1,Hsp90b1,Hspb7,Kmt2d,Mapk14,Myh10,Ncoa6,Parva,Pepd,Pparg,Ppp2r5c,Prickle1,Ptpn11,Ryr2,Speg,Sptbn1,Zdhhc16
MP:0011204	abnormal visceral yolk sac blood island morphology	0.000871	0.0125	23	4421	Common	Bmp4,Cdh5,Chm,Csk,Eng,F5,Fgfr1,Flt1,Fn1,Furin,Hus1,Ikbkap,Kdr,Ldb1,Lmo2,Npm1,Plcg1,Rapgef2,Tfpi,Tnrc6a,Vegfa,Yap1,Zfp36l1
MP:0006036	abnormal mitochondrial physiology	0.000881	0.0126	100	4421	Common	Abcb10,Abcc9,Abcg2,Adipoq,Aifm1,Apaf1,Bid,Casp9,Cav1,Cd47,Chchd10,Cisd1,Cisd2,Cluh,Col4a3bp,Coq9,Cox15,Crat,Dnaja3,Dnajc15,Dnm1l,Egln2,Fbxl5,Fnip1,Fth1,Gclc,Gpx1,Hccs,Hmox1,Hprt,Hspd1,Htra2,Lacc1,Lancl1,Lbr,Lclat1,Lmna,Lrpprc,Lrrk2,Mcat,Mcu,Mcur1,Mfn1,Mfn2,Micu2,Mpc1,Mterf3,Mtfr1,Mtm1,Mto1,Mtor,Mut,Ndufs4,Ndufs6,Nox4,Nr2f2,Opa1,Pabpn1,Park7,Parl,Pex13,Pex5,Pik3c3,Pink1,Pitrm1,Pnp,Pnpla8,Pnpt1,Ppa…
MP:0002339	abnormal lymph node morphology	0.000889	0.0127	169	4421	Common	Adamts9,Angptl4,Ap4e1,Apc,Arhgef6,Asah1,Atm,Atp2b4,Atp6v1b2,B3gnt5,B4gat1,Bcl3,Bcl6,Bhlhe40,Birc3,Btk,C9orf72,Casp8,Cbl,Cd200,Cd37,Cd74,Cd86,Cdkn1a,Cdkn2c,Cebpb,Cflar,Chd2,Chd4,Chst3,Ciita,Ciz1,Coro1a,Ctsl,Cxcr4,Cyld,Cytip,Dck,Ddost,Def6,Dennd1b,Diaph1,Dicer1,Dock2,Drosha,Efnb2,Elavl1,Ep300,Esr1,Ezh2,F2r,Fas,Fcgr2b,Foxo1,Foxo3,Galnt1,Gtpbp2,H2-Aa,H2-Ab1,Hmox1,Hr,Id2,Ids,Ifi44,Ikzf1,Il10rb,Il6st,I…
MP:0002792	abnormal retinal vasculature morphology	0.000891	0.0127	86	4421	Common	Adam15,Adam9,Adsl,Angpt2,Angptl4,Anpep,Anxa3,Arhgef15,Bbs4,Bmp4,Bmper,Cant1,Ccdc88a,Ccm2,Cd163,Cd82,Cdc123,Cdh13,Cdh5,Cisd2,Clic4,Col4a1,Cpt1a,Ctnnb1,Dcbld2,Dll4,Emc8,Epc2,Ephx2,Etfdh,F3,Fat1,Fgfr1op,Fkrp,Fzd4,Gsr,Icam1,Itgb2,Itgb3,Jag1,Kdr,Klhl20,Krit1,Large1,Limk2,Mertk,Mmp2,Myo10,Nos1ap,Nos2,Nos3,Notch3,Notch4,Nrp1,Ntn4,Pdcd10,Pdgfb,Pdgfrb,Per2,Pik3ca,Plxnd1,Pomgnt1,Pparg,Prkab1,Ptgs2,Rhoj,Rnf…
MP:0009115	abnormal fat cell morphology	0.000895	0.0128	119	4421	Common	Acad8,Acot13,Adcy3,Adipor2,Aebp1,Alms1,Ank2,Ankrd26,Ap1s2,Arhgef11,Arid5b,Arrdc3,Ate1,Atf3,Atm,Brd2,Bscl2,Cav1,Cavin2,Cbl,Ccdc3,Ccl2,Ccny,Cdkn1a,Cdkn1b,Ces1d,Cidea,Clock,Cluh,Cnot3,Crebbp,Crtc3,Cspg4,Cxcr4,Dok1,Dusp1,Ebf2,Ehmt1,Eif6,Eprs,Esr1,Fmo5,Fto,Ghr,Gk5,Gpd2,Grb10,Hif1an,Hmox1,Igf1r,Insr,Jdp2,Jup,Kdm3a,Kmt2d,Ksr1,Lamp2,Lclat1,Lipa,Lipe,Lmna,Lnpep,Lpin1,Lrp1,Lrp6,Mapk8,Mmp19,Myd88,Ncoa3,Ncor…
MP:0011088	neonatal lethality, incomplete penetrance	0.00093	0.0132	161	4421	Common	Abcb7,Ackr3,Adam17,Aff4,Ank2,Ano6,Ap3b1,Arhgap1,Arid5b,Atox1,Atp2a2,Atxn1l,Azin1,B3gnt5,B4galt1,Blmh,Bmpr1a,Brca2,Cald1,Cbl,Cdc42,Cdon,Cebpb,Cebpg,Cnbp,Col5a2,Cpeb4,Csad,Cux1,Daam1,Dact1,Derl2,Dnm2,Efnb1,Ehmt1,Exoc5,F3,F5,Fat1,Fbxo11,Fbxw8,Fkrp,Flnb,Fos,Fzd2,Gga2,Gga3,Gigyf2,Git1,Gja5,Gnao1,Gnaq,Gprc5b,Gucy1b1,Gusb,Gys1,H3f3a,Hdac8,Hif1a,Hltf,Id2,Igf1,Igf2r,Itgb1,Jag1,Jun,Kdm5b,Klf3,Kmt2e,Lama4,L…
MP:0001696	failure to gastrulate	0.000939	0.0134	34	4421	Common	Arid1a,Armc5,Bmpr2,Cops3,Cops5,Ctnnb1,Cxxc1,Dag1,Eif4g2,Ext1,Ext2,Ezh2,Gclc,Hnrnpc,Kdm1a,Lamb1,Mesd,Metap2,Myh9,Nf2,Pik3c3,Pnn,Rab7,Rnf2,Sbds,Setd1a,Smad2,Smad4,Stat3,Syf2,Tjp2,Txnrd1,Xrcc1,Zbtb17
MP:0000523	cortical renal glomerulopathies	0.000941	0.0134	90	4421	Common	Abca1,Adm,Ash1l,Bmp4,C1qa,C3,C4b,Ccni,Ccr1,Cd1d1,Cd2ap,Cd72,Cdkn1a,Cdkn2c,Cebpb,Cfh,Chd2,Clu,Coro1a,Crim1,Dkc1,Ep300,Esr1,Fas,Fat1,Fcgr2b,Gadd45a,Glis2,Gne,Golm1,Gpx7,Grk6,Hmox1,Hr,Ifih1,Itga1,Itga3,Lama5,Lamb2,Lbr,Lyn,Magi2,Man2a1,Mark2,Met,Mgat2,Mpv17,Mta2,Mtss1,Mtus1,Myh9,Myo1e,Nfe2l2,Nos3,Pdgfb,Pdgfra,Pdgfrb,Pgm3,Pik3c2a,Plcg2,Polb,Pparg,Ppp2ca,Prdx6,Prkcd,Prkci,Prkdc,Ptgs2,Ptpn22,Ptprc,Rc3h1…
MP:0000878	abnormal Purkinje cell number	0.000954	0.0135	44	4421	Common	Agtpbp1,Als2,Ank3,Arcn1,Atf2,Atxn1,B4galt2,Bmi1,Braf,Dnm1l,Ebf2,Egfr,Ei24,Fbxw7,Fmr1,Fzd4,Gba,Herc1,Ireb2,Ldb1,Lyst,Naglu,Npc1,Npc2,Numb,Pdha1,Pfdn5,Phyh,Pi4k2a,Pnpla6,Prnp,Psap,Pten,Pura,Rbfox2,Reln,Smad4,Stxbp1,Sumf1,Thrb,Vim,Vps18,Wdr81,Zfp423
MP:0000603	pale liver	0.000971	0.0137	58	4421	Common	Abhd5,Acox1,Adk,Ahr,Arf6,Asah1,Bag3,Bicc1,Bpnt1,Dhx36,Fah,Fbxl5,Fli1,Fubp1,Gba,Hdac3,Hmgcr,Kbtbd2,Kdm1a,Kitl,Lamp2,Lig1,Lpin1,Mapk14,Mthfd2,Myo18a,Nf1,Nfe2l1,Npc1,Nr1h3,Nras,Pik3c3,Pip4k2c,Pla2g16,Plau,Por,Pparg,Ppp2ca,Pten,Raf1,Rapgef2,Rb1cc1,Runx1,Sec61a1,Senp1,Sin3b,Slc20a1,Slc22a5,Srsf3,Stat5b,Supt4a,Tcea1,Thoc5,Tmem14c,Ttc7,Tysnd1,Yap1,Zfp36l2
MP:0010869	decreased bone trabecula number	0.00098	0.0138	39	4421	Common	Abhd5,Adipoq,Akr1a1,Cebpb,Chsy1,Ciita,Cnot3,Col1a2,Eif4e3,Fblim1,Fbn1,Fig4,Fosl2,Galc,Ifngr1,Igf1r,Inpp5d,Jak1,Lmna,Mcph1,Mgp,Naca,Notch2,Nov,P3h1,Ppib,Ptpn2,Rassf2,Rnf146,Rps6ka3,Serpinf1,Sh3bp2,Slc39a14,Smad1,Spop,Suco,Tmem119,Twsg1,Xylt1
MP:0001712	abnormal placenta development	0.00104	0.0146	74	4421	Common	Abca1,Abi1,Arnt,Ash1l,Chm,Chmp5,Ctbp2,Cul7,Cyr61,Dad1,Dap3,Ddx3x,Dph3,Enpp2,F2r,Fgfr2,Fkbp4,Fn1,Furin,Grb2,Gtf2i,Gtf2ird1,Hus1,Ikbkap,Il11ra1,Itga4,Itgb1,Itgb8,Kat7,Kdr,Krit1,Ldb1,Mapk1,Mapk14,Met,Mib1,Mpi,Nckap1,Ncoa1,Ncoa2,Ncoa6,Npm1,Nr2f2,Paxip1,Pdgfra,Plk2,Plpp3,Pnpla6,Ppard,Pparg,Pten,Ptgs2,Ptk2,Raf1,Setd2,Slk,Smad1,Smad2,Smad5,Src,Ss18,Supt20,Syde1,Tgfb1,Tjp1,Tmed2,Tpt1,Trip12,Ube2l3,Ubr5,U…
MP:0005281	increased fatty acid level	0.00104	0.0146	74	4421	Common	Abcd1,Abhd5,Acaca,Acadl,Acot7,Adipoq,Aldh2,Ank2,Ankrd26,Apc,Blvra,Bscl2,C3,Cavin1,Ccar2,Ccdc80,Ccl2,Cd36,Cpt1a,Cyp27a1,Dap,Eci1,Ecscr,Ehmt1,Fabp3,Fabp4,Fads3,Fto,Gfm1,Ghr,Gk,Hadh,Hadha,Hmgcr,Hsd17b4,Insr,Irs1,Itga8,Kdm3a,Kmt2b,Lipa,Lipe,Lpin1,Mgat4a,Ncor1,Ndufs6,Nfkb1,Nos3,Npy1r,Nus1,Osmr,Pde3b,Pdk4,Pex1,Pex7,Plau,Plscr3,Ppard,Pparg,Ppil3,Prkci,Pten,Rpn2,Sar1b,Scp2,Sdha,Sirt1,Slc43a2,Stat5b,Tbc1d…
MP:0001515	abnormal grip strength	0.00105	0.0148	186	4421	Common	2310022B05Rik,Abcg2,Abtb2,Ackr3,Adarb1,Adgrf5,Adipor2,Agl,Akr1b8,Ank,Ap4e1,App,Aqp1,Arhgap23,Arid1b,Armh3,Arrb2,Aspa,Atg5,Bace1,Bag3,Bahd1,Bbs4,Bicd1,Bmpr1a,Cap2,Cav1,Cbx5,Cd200,Cd55,Cd59a,Cd86,Cdkal1,Cept1,Chd2,Col12a1,Col4a1,Col6a2,Cpe,Crebbp,Cript,Cryab,Csnk2b,Ctdsp1,Dag1,Des,Dlg4,Dmd,Dnaja1,Dnajc5,Dnmt3a,Dtna,Dync1h1,Dync1li1,Edc4,Efemp1,Eftud2,Ehmt1,Eif2b5,Eif4g2,Ell2,Elmo1,Enpp1,Eya3,Fbxw8,…
MP:0000747	muscle weakness	0.00107	0.015	50	4421	Common	Abhd12,Agl,Aldh2,Arid1b,Aspa,Cept1,Cfl2,Cnp,Des,Dmd,Dnajc11,Dnajc5,Dnm2,Dst,Dysf,Fig4,Fkrp,Galc,Gars,Gas7,Gnptab,Hexb,Htra2,Itgb1,Kif1b,Lama2,Lmna,Mcm2,Mgrn1,Mocs2,Mtm1,Nfatc3,Pex5,Pik3r4,Pmp22,Ppard,Prkab2,Psap,Ptrh2,Sacs,Sgcg,Sms,Sod1,Tardbp,Tbce,Usp14,Vcp,Vegfa,Vps54,Zmpste24
MP:0002896	abnormal bone mineralization	0.00107	0.015	106	4421	Common	Acp2,Aldh2,Ank,Ano6,Apc,Atp2b1,Atp6v1h,Babam2,Bmpr1a,Cav1,Cd68,Cebpb,Chuk,Cisd2,Clk1,Cnot3,Col12a1,Col1a2,Creb3l1,Crtap,Csf1,Csf1r,Ctnnb1,Ctsk,Cul7,Ddr1,Ddx52,Dkk2,Ebf1,Eif2ak3,Elk4,Enpp1,Epc1,Esr1,Fam117b,Fam20c,Flnb,Fosl2,Gli3,Gse1,Hs2st1,Hspg2,Ibsp,Ick,Ifngr1,Ift88,Igf1r,Il6st,Irs1,Itgb1,Itgb2,Kdm6b,Lmna,Lrrk1,Mbtps1,Mia3,Mmp14,Mpi,Mrps35,Mta1,Mta3,Nabp2,Naca,Nfix,Nos2,Nos3,Notch2,Ofd1,Per2,Pe…
MP:0003057	abnormal epicardium morphology	0.00109	0.0151	16	4421	Common	Abi1,Braf,Cenpf,Des,Ep300,Flrt2,Itga4,Ncoa6,Osr1,Plxnd1,Ryr2,Speg,Tbx18,Tgfbr3,Vcam1,Zfp36l1
MP:0008143	abnormal dendrite morphology	0.00109	0.0152	110	4421	Common	Acp2,Agtpbp1,Arcn1,Arhgef15,Arhgef6,Arpc3,Atg7,Atm,Atxn1,Bace1,Bcl2l2,Bdnf,Bicd2,Braf,Brd7,C3,Caprin1,Cav1,Ccdc88a,Ccnd2,Cd47,Chmp2b,Ckap5,Cntn1,Coq9,Cpeb4,Cul4b,Cyfip2,Dab2ip,Dact1,Dbn1,Depdc5,Dlg1,Dlg4,Dpysl2,Dpysl3,Dusp1,Dync1li1,Ehmt1,Eif4h,Fmr1,Fos,Foxp2,Gas1,Git1,Grn,Homer1,Ireb2,Itpr1,Kalrn,Kdm5c,Kidins220,Kif21b,Lrp1,Lrrk2,Magi2,Map1a,Map1b,Mecp2,Mfn2,Mov10,Myh10,Myo5a,Ncstn,Nedd4,Nedd9,N…
MP:0009919	abnormal transitional stage T1 B cell morphology	0.00109	0.0151	16	4421	Common	Adam10,Akap13,Arhgap17,Bcl3,Cd22,Ell2,Eps15,Grb2,Hax1,Kdelr1,Lama5,Map3k14,Mtor,Notch2,Ptpn22,Zfp365
MP:0010352	gastrointestinal tract polyps	0.00109	0.0151	16	4421	Common	Ahr,Apc,Braf,Ctnnb1,Itgb1,Mcm2,Msh2,Pdgfra,Ppard,Prkdc,Pten,Sav1,Smad4,Smo,Stat3,Trp53
MP:0006319	abnormal epididymal fat pad morphology	0.0011	0.0152	68	4421	Common	Ace,Acot13,Ank2,Ap1s2,Atf3,Brd2,Bscl2,Cbl,Ccl2,Cebpb,Cebpd,Crbn,Cspg4,Dok1,Dusp1,Ehmt1,Esr1,Fam213a,Fmo5,Ghr,Gpd2,Grb10,Hif1an,Hsd11b1,Insr,Kbtbd2,Kdm3a,Klf3,Kmt2b,Lgr4,Lipa,Lpin1,Lrp1,Mapk8,Mlxipl,Myd88,Ncoa3,Ncor2,Npr3,Npy1r,Nr2c2,Osmr,Phf2,Pla2g16,Plin2,Pparg,Prdx3,Prkab1,Psip1,Pten,Ptpn1,Ptpn11,Rapgef3,Rcan2,Rictor,Rock1,Rps6kb1,Serpine1,Sirt1,Ssfa2,Tbc1d4,Thra,Tlr4,Tnks,Trib1,Trp53inp1,Vldlr…
MP:0008215	decreased immature B cell number	0.0011	0.0152	68	4421	Common	Adam10,Akap13,Atm,Atmin,Bcl3,Birc3,Blnk,Bmi1,Bst1,Btk,Cd22,Crebbp,Cxcr4,Cyld,Dicer1,Dynll1,Dyrk1a,Ebf1,Ell2,Erg,Esr1,Ezh1,Ezh2,Fas,Fnip1,Gon4l,Grb2,Hax1,Huwe1,Ikbkb,Ikzf1,Il7r,Kat6a,Kdelr1,Lama5,Lyn,Map3k14,Mcl1,Msi2,Mtor,Mtss1,Nfkb2,Nfkbia,Noc2l,Notch2,Npy1r,Pik3r1,Plcg2,Ppp2r3c,Prkdc,Ptpn2,Ptpn6,Rad50,Rc3h1,Runx1,Sh3bp2,Sh3kbp1,Sppl2a,St6gal1,Syk,Tcf12,Tnfsf13b,Traf6,Twsg1,Vcam1,Xrcc6,Zbtb1,Zfp…
MP:0000273	overriding aortic valve	0.00111	0.0153	37	4421	Common	4933434E20Rik,Ackr3,Adam19,Adamts6,Anks6,Ap2b1,Atg16l1,Atp11a,Cir1,Crkl,Dctn5,Dnm2,Ece1,Edn1,Ednra,Ephb4,Fbln1,Fgfr2,Hectd1,Hprt,Jag1,Kat6a,Myh10,Nprl3,Ntf3,Pcnt,Pdgfrb,Phc1,Pigv,Qrich1,Smad6,Smarca4,Snx17,Tab1,Trip11,Vegfa,Zfpm2
MP:0000322	increased granulocyte number	0.00112	0.0155	160	4421	Common	Abcb1a,Adam10,Adam17,Adgre5,Akna,Ankrd27,Apc,Arhgap25,Asah1,Atp11a,B4galt1,Bap1,Bcl6,Bcor,Bcr,C4b,C9orf72,Casp8,Ccl2,Cd59a,Cdh5,Cflar,Ciz1,Clpp,Cmklr1,Coro1a,Crebbp,Csf1,Csf1r,Csnk1g3,Ctnnb1,Cxcl12,Cxcr4,Ddx58,Dhx33,Diaph1,Dido1,Dlg3,Dock2,Drosha,Dusp1,Dyrk1b,Edc4,Ehmt1,Elavl1,Enpp3,Fas,Fbn1,Fos,G6pc3,Galnt18,Gcnt1,Gmds,Gnai2,Gpr65,Gsn,H2-Eb1,Hck,Hmox1,Icam1,Id1,Ier3,Ifi204,Ifih1,Ikzf1,Il13ra1,Il…
MP:0004986	abnormal osteoblast morphology	0.00113	0.0155	78	4421	Common	Adipoq,Akr1a1,Apc,Atp6v1h,Bgn,Bmp4,Cebpb,Col12a1,Creb3l1,Csf1,Csf1r,Ctnnb1,Ctsk,Dicer1,Dkk2,Ebf1,Eif2ak3,Esr1,Evc2,Fam20c,Fblim1,Fgfr1,Fgfr2,Fig4,Fos,Fosl2,Gba,Gja1,Gnptab,Gsk3b,Hivep3,Htr1b,Ibsp,Ifngr1,Ift88,Igf1r,Il6st,Irak3,Irs1,Islr,Itgb1bp1,Kdm6b,Klf10,Mia3,Mmp14,Mmp2,Naca,Nbr1,Nf1,Nf2,Notch2,Npr3,Nr3c1,Nxn,Per1,Plekhm1,Ppard,Pparg,Prdm5,Prkcd,Rassf2,Rnf146,Sh3bp2,Slc30a5,Smad1,Smad4,Sost,Sp…
MP:0009345	abnormal trabecular bone thickness	0.00113	0.0155	56	4421	Common	Abhd5,Adam17,Akr1a1,Atp6v1h,Casp3,Cav1,Cd47,Cebpb,Chsy1,Cisd2,Cnot3,Creb3l1,Csf1,Ctgf,Ctsk,Ebf1,Fam20c,Fbn1,Fosl2,Hivep3,Htra1,Ibsp,Id1,Ifngr1,Igf1r,Il6st,Inpp5d,Irs1,Itgb3,Lrrk1,Mgp,Naca,Nfix,Nos3,Notch2,Npy1r,P3h1,Pdk4,Plcg2,Pparg,Ppib,Rassf2,Sh3bp2,Slc39a14,Smad1,Socs2,Sost,Spop,Spp1,Stat3,Suco,Thra,Thrb,Tmem64,Tnfrsf11a,Xylt1
MP:0010066	abnormal red blood cell distribution width	0.00113	0.0155	56	4421	Common	Adgrf5,Ago2,Arpc1b,Bnip3l,Cdk5rap2,Chordc1,Chsy1,Cpox,Cyb561a3,Dbn1,E2f4,Ep300,Exoc6,Fam53b,Fbxo7,Fech,Galnt18,Hbs1l,Hk1,Hmox1,Ireb2,Jak1,Jak2,Klf3,Lig1,Lpin2,Lztr1,Man2a1,Mcat,Mgat4b,Nfe2l2,Npm1,Nprl3,Pdgfrb,Picalm,Pld3,Prdx1,Prkaa1,Prkab1,Prkag1,Prkg1,Rb1cc1,Runx1,Slc11a2,Slc25a30,Slc40a1,Stat5b,Trf,Ttc28,Ttc7,Ulk1,Uros,Vps13a,Vps13c,Wars,Wsb2
MP:0010639	altered tumor pathology	0.00114	0.0157	92	4421	Common	Ace,Adam15,Adam9,Adamts12,Aggf1,Antxr1,Anxa1,Apc,Arl6ip5,Atf3,Braf,Cav2,Ccdc80,Ccr5,Cd248,Cd44,Cd82,Cdkn1a,Cst3,Cxcl16,Cygb,Dock4,Elavl1,Epha2,Ets2,Fbln5,Fos,Gpnmb,Hgf,Hif1a,Hmgn1,Htatip2,Icam1,Id1,Idh2,Ifnar1,Ifngr1,Igf1,Il6ra,Itga6,Itgal,Itgb3,Jam3,Klf10,Loxl2,Lyst,Map3k8,Mcm3,Mgat5,Mmp2,Msh2,Msi2,Nbeal2,Nf2,Notch4,Npr1,Nr4a1,Nrp1,Ntn4,Plau,Plcl1,Pld1,Plk3,Postn,Prdx1,Pten,Ptk2,Rb1,Rbpj,Rcan1,R…
MP:0004166	abnormal limbic system morphology	0.00122	0.0168	194	4421	Common	Abcb1a,Agtpbp1,Akt3,Aldh2,Ank3,Ap3m2,Apaf1,App,Arfgef1,Arid1b,Arpc3,Atg5,Atg7,Atp1a2,Atp7a,Atrx,Bad,Basp1,Bbs2,Bbs4,Bbs7,Bdnf,Bicd2,Bid,Bmi1,Braf,Brpf1,Btg1,C1qa,C3,Cadm1,Cadps,Cav1,Ccdc88a,Cd81,Cdk5,Cdk5rap2,Cdkn1b,Cers2,Chd7,Chmp2b,Ckap5,Ckb,Clcn3,Cln3,Clock,Col4a1,Csf1,Cspg4,Cst3,Ctnnb1,Ctnnd1,Ctsd,Cxcr4,D430042O09Rik,Dag1,Dbn1,Dlg4,Dmxl2,Dpysl3,Dyrk1a,Ebf2,Ehmt1,Ei24,Eif4ebp2,Eno2,Esr1,Fkrp,F…
MP:0003203	increased neuron apoptosis	0.00125	0.0171	93	4421	Common	Aifm1,Akt3,Apaf1,App,Arfgef1,Arhgap1,Atg7,Atp7a,Atr,Bcl2l1,Bdnf,Braf,Btg1,Caprin1,Cask,Cast,Cdk5rap2,Copb2,Coq9,Cx3cl1,Cx3cr1,Dnm1l,Dusp1,Ei24,Eml1,Eno2,Fn1,Gclm,Gpx1,Grn,Hax1,Hnrnpab,Htra2,Hyou1,Igf1,Ikbkap,Kdm2a,Kidins220,Lancl1,Lbr,Mbp,Mcph1,Mfn2,Mocs2,Mpp5,Ncstn,Ndfip1,Nos3,Notch2,Notch4,Ntrk2,Oxr1,Park7,Parl,Pdgfrb,Pik3c3,Pink1,Plrg1,Polb,Prmt5,Prnp,Psen1,Psmc1,Ptgs2,Rb1,Rbfox2,Rbl2,Rbm8a,Re…
MP:0010954	abnormal cellular respiration	0.00126	0.0172	79	4421	Common	Abcg2,Acacb,Acadvl,Acss1,Adipoq,Aifm1,Aldh2,Apaf1,Bscl2,Casp9,Cat,Cav1,Cavin3,Cd163,Cept1,Chchd10,Cisd1,Cisd2,Clpp,Cluh,Coq9,Cox15,Crat,Dnaja3,Dnajc15,Dnm1l,Dusp1,Hccs,Hdac3,Hmox1,Hspb8,Hspd1,Htra2,Lacc1,Lclat1,Lig3,Lmna,Mcat,Mfn2,Mterf3,Mtfr1,Mut,Ndufs4,Ndufs6,Nln,Nr2f2,Opa1,Park7,Pex5,Pink1,Plec,Pnpla8,Pnpt1,Ppard,Prdm16,Ptcd2,Rnaseh1,Sat1,Sdhd,Shmt2,Sirt1,Sirt3,Slc25a12,Sod2,Sqstm1,Tfam,Tgm2,T…
MP:0004624	abnormal thoracic cage morphology	0.00128	0.0174	240	4421	Common	4933434E20Rik,Acan,Adamts2,Adamts6,Adgrd1,Alkbh1,Ano6,Ap1b1,Apc,Arid5b,Arpc1b,Ash1l,Asxl2,Atp11a,Atp7a,Atpaf2,Axin1,Bmi1,Bmp4,Bmp6,Bmper,Bmpr1a,Bmpr1b,Bmpr2,Bnip2,Brca2,Brd2,Btg2,Cbx5,Ccdc134,Cdc42,Cebpb,Chrd,Chsy1,Chuk,Cir1,Cmip,Cnot6,Col27a1,Col4a2,Col4a3bp,Coro1c,Cplane1,Crebbp,Crim1,Csrnp1,Ctgf,Ctnnb1,Dap,Dbn1,Dchs1,Dennd1c,Denr,Derl2,Dlg3,Dvl2,Dym,Efemp1,Efnb1,Eif3h,Elavl1,Evc2,Evi5,Eya1,Fam…
MP:0013026	decreased Ly6C low monocyte number	0.00128	0.0174	18	4421	Common	4933434E20Rik,Acbd5,Agap1,Ap4e1,Fam92a,Galnt18,Gmds,Ifnar1,Irf5,Klf4,Ldlrad4,Metrnl,Myo10,Nr4a1,Pycr2,Slu7,Tead3,Usp5
MP:0000161	scoliosis	0.00131	0.0177	26	4421	Common	Bmp4,Brd2,Cir1,Col1a2,Crebbp,Dhx35,Dvl2,Enpp1,Ext1,Flnb,Foxn3,Jun,Kat14,Lama2,Lasp1,Lbr,Lmnb1,Map3k4,Nfix,Sik3,Slc39a14,Spg7,Ssr2,Trps1,Vegfa,Zmpste24
MP:0003961	decreased lean body mass	0.00131	0.0177	141	4421	Common	Acot7,Acsl3,Acsl4,Adipor2,Ahcyl1,Akap9,Aktip,Ap4e1,Arap1,Aspa,Bag3,Baz1a,Bbx,Btrc,Cbx4,Cdipt,Cdk5rap2,Cers5,Chd2,Chd4,Cisd2,Clpp,Col14a1,Crlf3,Ctgf,Ctr9,Cttn,Cystm1,Daam2,Ddx10,Degs1,Dmxl2,Dnajc10,Dnajc19,Dolk,Dusp3,Eif4g2,Elk4,Fbxo33,Flnb,Fnbp1l,Foxp2,Fto,Gart,Ghr,Gnptab,H6pd,Hbs1l,Hcfc1,Hectd3,Herc2,Hspa5,Id2,Idh1,Inpp1,Iqce,Itch,Kat14,Lactb,Lipe,Lpin1,Lpin2,Lrrk1,Mcph1,Miga2,Mnat1,Mtor,Mxra7,M…
MP:0005632	decreased circulating aspartate transaminase level	0.00131	0.0177	26	4421	Common	Acaa1a,Amfr,Anapc4,Asl,Cog2,Ctso,Dbn1,Eif4e3,Fkbp9,Fto,Hmox1,Kif21b,Lrig1,Ltbp1,Miga2,Myd88,Nf1,Nos2,Nr2c2,Pex3,Pik3c3,Polb,Rasal3,Smarcd1,Trim27,Ufl1
MP:0010403	atrial septal defect	0.00131	0.0177	54	4421	Common	Ackr3,Acvr1,Adam19,Anks6,Ate1,Atp2a2,Baz1b,Bmp4,Cc2d2a,Cep290,Cntrl,Cplane1,Crebbp,Cyr61,Dhrs3,Dync2h1,Ep300,Epha3,Fbln1,Flna,Gja5,Ift74,Ift88,Kat6a,Klf3,Ltbp1,Megf8,Mgrn1,Nipbl,Nos3,Nr1d2,Nsd2,Ntf3,Osr1,Pcnt,Pcsk5,Pcsk6,Pds5a,Pds5b,Phc1,Pkd2,Plxnd1,Prickle1,Ptpn11,Rpgrip1l,Sema3d,Setd5,Sh3pxd2a,Sirt1,Smo,Sos1,Srsf10,Tgfb2,Zfpm2
MP:0003886	abnormal embryonic epiblast morphology	0.00135	0.0183	43	4421	Common	Acvr1,Acvr1b,Adamts9,Apc,Bmpr1a,Bmpr2,Bptf,Cdc42,Cops3,Ctnnb1,Cxxc1,Dab2,Dido1,Ecsit,Fermt2,Fgfr1,Gata6,Gtf2i,Hif1a,Htt,Kif16b,L3mbtl2,Med28,Mesd,Mga,Nbn,Pik3c3,Pofut2,Prickle1,Prkci,Rab6a,Rac1,Rangap1,Rnf2,Rybp,Smad1,Smad2,Smad4,Taf10,Tpt1,Txnrd1,Uba3,Wee1
MP:0002018	increased malignant tumor incidence	0.00136	0.0184	146	4421	Common	Acox1,Ahr,Anxa7,Apc,Arid4a,Atad5,Atm,Atp2a2,Atp2c1,Bap1,Becn1,Braf,Brca2,Cbx7,Ccdc80,Ccndbp1,Cdc37,Cdkn1a,Cdkn1b,Cdkn2c,Cers2,Chuk,Cop1,Crebbp,Ctnnb1,Cul9,Cytip,Dclre1a,Dgkd,Dicer1,Dkc1,Dok1,Dok3,Eef1e1,Eif4e,Elavl1,Errfi1,Esr1,F3,Fah,Fbxo4,Flcn,Fosl2,Foxo3,Fyn,Gnai2,Gon4l,Gpx7,Hck,Hgf,Hip1,Hmgn1,Htatip2,Iqgap2,Itgav,Kmt2a,Lgals3,Lig1,Lmo7,Map3k7,Mapk14,Mcm4,Mcm9,Met,Mif,Mlh1,Mnt,Msh2,Msh3,Msh6,N…
MP:0002933	joint inflammation	0.00136	0.0183	73	4421	Common	Acan,Adam8,Adamts5,Aif1,Alox5ap,Ank,Ash1l,Atp7a,Bgn,Bmpr1a,Bmx,C3,Cd1d1,Cd200,Cd274,Cd276,Cd44,Cd59a,Cdkn1a,Cfp,Chsy1,Clec5a,Ctss,Cxcr4,Cytl1,Dicer1,Dnase2a,Dusp1,Enpp1,Erg,Errfi1,Fcgr1,Fcgr2b,Fcgr4,Fmod,Hif1a,Hspg2,Hyal1,Ifngr1,Il1r1,Il1rn,Il6st,Irf1,Ksr1,Lgals9,Ltbp3,Mmp14,Mmp2,Myd88,Ndst2,Nid2,Papss2,Pecam1,Pik3cg,Plat,Plau,Plcg2,Pparg,Ptger4,Ptgs1,Ptgs2,Ptpn6,Selp,Sh3bp2,Sod3,Syvn1,Tia1,Tlr4,…
MP:0003852	skeletal muscle necrosis	0.00137	0.0184	24	4421	Common	Ccl2,Col6a1,Cryab,Dag1,Des,Dmd,Dysf,Egln2,Fat1,Fkrp,Foxj3,Itga7,Lama2,Large1,Maml1,Pfkm,Pik3r4,Plaa,Plec,Sgcb,Sgcd,Sgcg,Synm,Vcp
MP:0008410	increased cellular sensitivity to ultraviolet irradiation	0.00138	0.0185	20	4421	Common	Atr,Bcl2l1,Casp3,Cdkn1a,Chd2,Cul4a,Ercc3,Hmgn1,Ing1,Ino80,Polk,Prkdc,Rasa1,Rnf168,Sirt1,Trove2,Trp53,Usp4,Usp47,Xpc
MP:0008719	impaired neutrophil recruitment	0.00139	0.0186	33	4421	Common	Alox5ap,B4galt1,C3ar1,C5ar1,Cav1,Ccr1,Cd44,Cd47,Chuk,Cmklr1,Ctsc,Flot1,Gsn,Icam1,Ikbkb,Il17ra,Itgb2,Jagn1,Lgals3,Mcl1,Mmp28,Pde4b,Pde4d,Pik3cg,Pik3r5,Prex1,Pten,Ptn,Rac1,Rock1,Selp,St3gal6,Traf3ip2
MP:0001839	abnormal level of surface class I molecules	0.0014	0.0186	10	4421	Common	B2m,Erap1,Nup98,Prkdc,Psmb8,Stat1,Tap1,Tap2,Tapbp,Tpp2
MP:0002993	arthritis	0.0014	0.0186	70	4421	Common	Acan,Adam8,Adamts5,Aif1,Alox5ap,Ank,Ash1l,Atp7a,Bgn,Bmpr1a,Bmx,C3,Cd1d1,Cd200,Cd274,Cd276,Cd44,Cd59a,Cdkn1a,Cfp,Chsy1,Clec5a,Ctss,Cxcr4,Cytl1,Dicer1,Dnase2a,Dusp1,Enpp1,Erg,Errfi1,Fcgr1,Fcgr2b,Fcgr4,Fmod,Hif1a,Hspg2,Hyal1,Ifngr1,Il1r1,Il1rn,Il6st,Irf1,Ksr1,Lgals9,Ltbp3,Mmp14,Mmp2,Myd88,Ndst2,Nid2,Papss2,Pecam1,Pik3cg,Plat,Plau,Plcg2,Pparg,Ptger4,Ptgs1,Ptgs2,Ptpn6,Selp,Sod3,Syvn1,Tia1,Tlr4,Tnfsf10…
MP:0004783	abnormal cardinal vein morphology	0.0014	0.0186	22	4421	Common	Acvrl1,Braf,Ccm2,Dll4,Efnb2,Ephb4,Flt4,Furin,Gli3,Hdac7,Hspb7,Hspg2,Ikbkap,Kctd10,Nr2f2,Pdcd10,Pik3ca,Ptprb,Rbpj,Tbx18,Wasf2,Wnk1
MP:0005595	abnormal vascular smooth muscle physiology	0.0014	0.0186	80	4421	Common	Abcc9,Acta2,Acvrl1,Adipoq,Appl1,Arhgap42,Arhgef1,Arhgef12,Asl,Atp2b1,Atp2b4,Bcar1,Bmpr2,Cacnb3,Cav1,Ccl2,Cd44,Chrd,Col3a1,Crim1,Crk,Csrp2,Cul3,Cx3cr1,Ddah1,Ece1,Ednrb,Eng,Esr1,F3,Fbln5,Fgfr2,Gja1,Gucy1a1,Gucy1b1,Hmox1,Ier3,Irs1,Kcnk6,Kcnmb1,Krit1,Lmna,Lrp1,Map3k1,Mmp2,Mrvi1,Myh11,Nos3,Nov,Npr1,Npy1r,Nr3c2,P2rx4,P2ry2,Pdgfrb,Pecam1,Poldip2,Pomt1,Pparg,Prkg1,Psen1,Ptk2b,Ptprm,Rgs2,Rock2,S100a1,Shc1…
MP:0013876	absent ductus venosus valve	0.0014	0.0186	22	4421	Common	4933434E20Rik,Adcy9,Anks6,Atg16l1,Atp11a,Col4a2,Coro1c,Crim1,H13,Hmgxb3,Morc2a,Nsun2,Pth1r,Rpgrip1l,Setd5,Sh3pxd2a,Smg9,Ssr2,Tcf7l2,Tent5c,Traf6,Trappc9
MP:0020254	decreased collagen level	0.0014	0.0186	10	4421	Common	Bgn,Col4a1,Ddr2,Fam20c,Fam213a,Hsd11b1,Igf1r,Itgb3,Pepd,Ppib
MP:0003755	abnormal palate morphology	0.00141	0.0186	151	4421	Common	Acan,Acvr1,Acvr2a,Adamts6,Adgra2,Ap2b1,Apaf1,Arhgap29,Arid5b,Bmp4,Bmpr1a,Bnc2,Cask,Casp3,Cc2d2a,Cdc42,Cdon,Chd7,Chrd,Chuk,Ckap5,Cplane1,Cramp1l,Crebbp,Crk,Csrnp1,Ctgf,Ctnnb1,Cyp51,Ddx10,Dhrs3,Dlg1,Dnm2,Edn1,Ednra,Ednrb,Efnb1,Efnb2,Egfr,Ermp1,Ext1,Eya1,Fbxo11,Fbxw7,Fgfr1,Fgfr2,Flna,Foxn3,Fst,Fuz,Fzd2,Gab1,Glg1,Gli3,Golgb1,Grb2,Gsk3b,Gskip,Hand2,Hoxa3,Hs2st1,Hspa5,Hspg2,Ick,Ift140,Ift172,Ift88,Impa…
MP:0005334	abnormal fat pad morphology	0.00141	0.0186	151	4421	Common	Ace,Acot13,Acot7,Adipoq,Adipor2,Ank2,Anxa1,Ap1s2,Arrdc3,Asah1,Atf3,Bag3,Bbs2,Brd2,Bscl2,C1qtnf1,C3ar1,Cav1,Cbl,Ccdc3,Ccl2,Ccny,Cd36,Cdkal1,Cdkn1a,Cdkn1b,Cebpb,Cebpd,Clcn3,Crbn,Cspg4,Cxcr4,Dgat1,Dhcr24,Dok1,Dusp1,Ehmt1,Eif3m,Eif4ebp1,Eif4h,Esr1,Fam213a,Fmo5,Fosl2,Foxp2,Fto,Ghr,Gpam,Gpd2,Grb10,Hif1an,Hsd11b1,Id2,Igf1r,Il1r1,Insr,Kbtbd2,Kdm3a,Klf3,Kmt2b,Lamp2,Lgr4,Lipa,Lipe,Lpin1,Lpin2,Lpl,Lrp1,Manf…
MP:0010490	abnormal inferior vena cava valve morphology	0.00141	0.0186	13	4421	Common	4933434E20Rik,Atg16l1,Cog6,Coro1c,Cyfip2,H13,Prmt7,Pth1r,Rpgrip1l,Smg9,Ssr2,Trappc9,Xpnpep1
MP:0013835	absent hypoglossal nerve	0.00141	0.0186	13	4421	Common	4933434E20Rik,Atg16l1,Capza2,Cmip,Dbn1,H13,Hmgxb3,Kif1bp,Nsun2,Prrc2b,Rpgrip1l,Sh3pxd2a,Unk
MP:0013968	multiple persisting craniopharyngeal ducts	0.00141	0.0186	13	4421	Common	Atp11a,Capza2,Cir1,Cmip,Coro1c,Dmxl2,H13,Npat,Rala,Slc20a2,Slc25a20,Traf6,Trappc9
MP:0005608	cardiac interstitial fibrosis	0.00143	0.0188	46	4421	Common	Aars,Akap13,Akap6,Asxl2,Atp2a2,Bcl6,Cap2,Ctsl,Des,Dnaja3,Dnm1l,Egln1,Gas2l3,Gnaq,Hccs,Hdac3,Jup,Lama4,Lmna,Lpl,Lrp1,Map2k3,Mapk14,Med1,Mtor,Myh10,Nek6,Nox4,Npr1,Npy1r,Plat,Plau,Ppp3ca,Ptger4,Ptk2,Ptpn11,Raf1,Slc2a4,Sod2,Sos1,Tlr2,Tpm1,Uvrag,Wrn,Zmpste24,mt-Co1
MP:0008217	abnormal B cell activation	0.00143	0.0188	102	4421	Common	Arhgdib,Arhgef1,Arhgef6,Bcl10,Bcl3,Bcl6,Birc3,Blnk,Btk,Casp8,Ccnd3,Cd22,Cd59a,Cd72,Cd74,Cd81,Clec4d,Ctnnbl1,Dapp1,Dok1,Ebf1,Elf4,Ep300,Ercc1,Ets1,Ezh2,Fas,Fli1,Grb2,Huwe1,Id3,Igbp1,Ikbkb,Ikzf1,Irak4,Irf2,Kmt2d,Lgals9,Ly86,Lyn,Magt1,Map3k14,Map3k7,Mark2,Mavs,Mcm3ap,Mtor,Myd88,Nbn,Ncoa3,Nfatc1,Nfkb1,Nfkb2,Nfkbia,Notch2,Orai1,Otud7b,Parp14,Pawr,Peli1,Pfdn1,Pik3ap1,Pik3r1,Plcg2,Plcl2,Pnp,Pparg,Ppm1d,…
MP:0010831	lethality, incomplete penetrance	0.00143	0.0188	134	4421	Common	Ace,Ackr3,Adam17,Aebp1,Akap9,Alkbh1,Apaf1,Ash1l,Atg7,Atm,B3gnt5,Baiap2,Bmpr1a,Brca2,Cap2,Chd2,Clic4,Col5a2,Cpeb4,Creb1,Crim1,Daam1,Dact1,Ddr2,Ddx58,Derl2,Dyrk1a,Ebp,Egln1,Ehmt1,Eif3c,Epas1,F2r,Fbxw8,Flnb,Fut8,Gapdh,Gata2,Git1,Glg1,Gnao1,Gnptab,Gpi1,Hdac2,Herc1,Hyal2,Id2,Ifih1,Ift80,Igf1,Igf2r,Ikbkap,Itsn1,Kat14,Kcmf1,Kitl,Klf3,Lgr4,Lmna,Lpin1,Magoh,Mcph1,Mitf,Msh2,Mta2,Mut,Myh10,Myo10,Ndn,Ndrg2,N…
MP:0012103	abnormal bilaminar embryonic disc	0.00143	0.0188	46	4421	Common	Acvr1,Acvr1b,Adamts9,Apc,Bmpr1a,Bmpr2,Bptf,Cdc42,Cops3,Ctnnb1,Cxxc1,Dab2,Dido1,Ecsit,Fermt2,Fgfr1,Fgfr2,Gata6,Gtf2i,Hif1a,Htt,Kif16b,L3mbtl2,Lamc1,Med28,Mesd,Mga,Nbn,Pik3c3,Pofut2,Prickle1,Prkci,Rab6a,Rac1,Rangap1,Rnf2,Rybp,Smad1,Smad2,Smad4,Taf10,Tpt1,Txnrd1,Uba3,Ugdh,Wee1
MP:0003084	abnormal skeletal muscle fiber morphology	0.00145	0.019	106	4421	Common	Acadvl,Adarb1,Adipoq,Agtpbp1,Aifm1,Als2,App,Bag3,Cav1,Cav2,Cebpb,Cfl2,Cisd2,Clcc1,Col6a1,Col6a3,Cox15,Cryab,Ctss,Dag1,Des,Dmd,Dnm2,Dock1,Dst,Dusp1,Dysf,Emd,Ep300,Fat1,Fbn1,Fhl1,Fkrp,Flnc,Fst,Fzd4,Gars,Gas7,H6pd,Hgf,Hspb7,Hspd1,Hspg2,Ikbkb,Ilf3,Itga7,Itgb1,Lama2,Lamc1,Large1,Lmna,Lmo7,Ltn1,Maml1,Mbnl1,Mbnl2,Mmp14,Mtm1,Mtor,Myof,Ncoa3,Ncor1,Nf1,Nfatc3,Nr1d1,Pabpn1,Parl,Pfkm,Pik3r1,Pik3r4,Pla2g4a,Pl…
MP:0004499	increased incidence of tumors by chemical induction	0.00145	0.0189	67	4421	Common	Ahr,Aldh2,Apc,Atg4c,Bap1,Bin1,Bub3,Cat,Cav1,Cdkn1a,Cdkn1b,Chfr,Chordc1,Cul9,Cygb,Cyld,Egr1,Elavl1,Epha2,Errfi1,Etv6,Fgfr2,Flcn,Fos,Gnai2,Hint1,Ifnar1,Ifnar2,Irf1,Klf10,Klf4,Map3k6,Map3k8,Mapk8,Mif,Msh2,Mxi1,Ncoa3,Ndrg1,Nfe2l2,Nit1,Plcl1,Pms2,Ppard,Pparg,Ppp2r1a,Ppp6c,Prkch,Pten,Ptgs2,Ptpn11,Rae1,Ralgapa2,Ranbp2,Rassf1,Skil,Stat3,Taf4,Tgfbi,Tgfbr2,Thbs2,Tnfsf10,Trp53,Trp53inp1,Uaca,Uimc1,Yap1
MP:0004983	abnormal osteoclast cell number	0.00146	0.0191	77	4421	Common	Adam8,Akr1a1,Ankrd11,Bmpr1a,C3,C3ar1,C5ar1,Ccl2,Cd47,Cebpb,Ciita,Cnot3,Csf1,Ctnnb1,Ctsk,Ctsl,Dkk2,Ebf1,Egr1,Esr1,Farp2,Fblim1,Fcgr4,Fgfr2,Fos,Fosl2,Gab2,Gnptab,Hivep3,Hspg2,Ibsp,Id1,Igf1r,Il6st,Inpp5d,Irak3,Irs1,Itgb3,Lifr,Limd1,Lrrk1,Mitf,Mmp2,Ncor2,Nf1,Nfatc1,Nfkb1,Nos2,Notch2,P2rx7,Pdk4,Plcg2,Postn,Ppard,Pparg,Rassf2,Rgs10,Rnf146,Sfrp4,Sgpl1,Sh3bp2,Slc39a14,Smad4,Sparc,Spp1,Sqstm1,Stat1,Suco,T…
MP:0010358	abnormal free fatty acids level	0.00147	0.0192	114	4421	Common	Abhd5,Acaca,Acadl,Acot13,Acot7,Acss1,Adipoq,Aldh2,Ank2,Ankrd26,Apc,Bscl2,C1qtnf1,C3,Cav1,Cavin1,Cbl,Cc2d1b,Ccdc80,Ccl2,Ccny,Cd36,Cebpb,Ces1d,Chn1,Chuk,Cpt1a,Crat,Crbn,Crebbp,Crtc3,Dap,Dclk1,Dgat2,Dip2b,Dixdc1,Dnajc15,Dpy19l3,Dusp1,Ecscr,Ehmt1,Fabp3,Fads3,Faf2,Foxo1,Fto,Gab1,Gfm1,Ghr,Hadh,Hadha,Hmgcr,Hmox1,Ift80,Inpp5k,Inppl1,Insr,Irs1,Itga8,Kdm3a,Kif26b,Kmt2b,Lipa,Lipe,Lpin2,Lrp1,Mgat4a,Mier1,Min…
MP:0005501	abnormal skin physiology	0.0015	0.0195	161	4421	Common	Abcg2,Abhd5,Acvr1b,Adam17,Adam9,Ahr,Aldh3a2,Angptl2,Arih2,Arl6ip5,Arnt,Atp7a,Bcl2l1,Blmh,Cacna1c,Casp3,Casp8,Cd109,Cd44,Cd47,Cdh5,Cdkn1a,Cdkn1b,Cebpb,Chuk,Clic4,Clpp,Col14a1,Col3a1,Col5a2,Ctgf,Ctnna1,Ctsl,Cyld,Dcn,Dgat2,Dgkd,Diaph1,Dicer1,Dpt,Drosha,Dse,E4f1,Efnb2,Elovl1,Eps15,Ercc5,Fabp5,Fads2,Fbn1,Fech,Fgfr2,Fos,Foxo3,Fto,Gab1,Gadd45a,Gak,Gja1,Gpr89,Gpx8,Hmgn1,Ifih1,Ikbkb,Il17ra,Il1rn,Irf2,Itch…
MP:0002199	abnormal brain commissure morphology	0.00153	0.0199	88	4421	Common	Akt3,Ank2,Ap4e1,App,Arfgef1,Arhgap35,Arhgap5,Arid1b,Atr,Bicd2,Bmi1,Brpf1,Canx,Casp9,Cd81,Chd7,Clip2,Csf1r,Ctnnb1,Dclk1,Ebf1,Efnb1,Efnb2,Eif4h,Enah,Ext1,Fgfr1,Fgfr2,Fyn,Galc,Gli3,Hfe,Hsf1,Hspa5,Htt,Ireb2,Itpr3,Itsn1,Kif1b,Kif1bp,Kif3a,Map1b,Map2k4,Map3k12,March7,Marcks,Marcksl1,Mbp,Mycbp2,Napa,Ndst1,Nfia,Nfib,Nfix,Nipbl,Nos2,Npc1,Nrp1,Nrp2,Ntn1,Pdha1,Pfdn1,Plaa,Prnp,Ptbp2,Pten,Rab18,Rac1,Robo1,Rpg…
MP:0004007	abnormal lung vasculature morphology	0.00153	0.0198	55	4421	Common	Abca3,Acvrl1,Adam17,Adipoq,Aggf1,Bmpr2,Cav1,Cavin1,Cavin2,Creb1,Cryab,Ctnnb1,Dnm1l,Dync2h1,Egln1,Epas1,Epha3,Errfi1,Fbn1,Fosl2,Fstl1,Fuz,Gbe1,Git1,Gnaq,Gucy1a1,Gys1,Kifap3,Lama5,Lpl,Mef2d,Mgp,Nos3,Npc1,Npc2,Pcyt1a,Pdlim7,Pecam1,Pikfyve,Plvap,Prrx1,Pten,Ptger4,S100a1,Shoc2,Slc2a10,Slit3,Stat3,Tgfb3,Tgfbr1,Thbs1,Tomm5,Trip11,Vegfa,Wwtr1
MP:0005023	abnormal wound healing	0.00155	0.0201	103	4421	Common	Abhd2,Acvrl1,Adam9,Adamts7,Adipoq,Aebp1,Aimp1,Ankrd1,Anxa1,Arhgap1,Arpc3,B4galt1,Cav1,Ccl2,Cd44,Cdkn1b,Clic4,Coro7,Cplane1,Csrp1,Csrp2,Cx3cr1,Daam1,Ddr2,Dlc1,Dst,E4f1,Egr1,Eng,Esr1,F2r,F3,Fbln5,Flii,Fn1,Gab1,Gja1,Gsk3b,Gsn,Hif1a,Hspb1,Ier3,Igf1r,Il1r1,Il1rn,Il6ra,Irf1,Irs1,Itga3,Itgb1,Itgb3,Jdp2,Jun,Klf4,Lpp,Lrp1,Lum,Map3k1,Met,Mmp11,Myh11,Nbeal2,Ncoa6,Nf1,Nono,Nos2,Nos3,Nov,Parp1,Pdgfrb,Plec,Ppa…
MP:0012440	abnormal neutrophil cell number	0.00157	0.0203	162	4421	Common	Adam10,Adam17,Akna,Ankrd27,Arhgap15,Arhgap25,Arid4a,Asah1,B4galt1,Bag3,Bap1,Bcor,Bcr,Btk,C3,C3ar1,C4b,C9orf72,Ccl2,Cd47,Cd59a,Cdh5,Cerk,Cflar,Chst3,Ciz1,Cmklr1,Col4a3bp,Coro1a,Ctnnb1,Cul4a,Cxcl12,Cxcr4,Dennd4c,Diaph1,Dock2,Dyrk1b,Eftud2,Ehmt1,Eif3h,Etv6,F3,Fas,Fastk,G6pc3,Galnt18,Gcnt1,Gmds,Gnai2,Gpr65,Gsn,Hax1,Hnrnpd,Icam1,Id1,Ier3,Ifi204,Il17ra,Il1r1,Il6st,Inpp5d,Irak3,Irf5,Irf8,Itgal,Itgam,Itg…
MP:0020148	abnormal sensitivity to induced morbidity/mortality	0.00157	0.0203	225	4421	Common	Abcc1,Abcc10,Abcc4,Acadvl,Ace,Adam17,Adh1,Adh5,Adipoq,Adm,Aebp1,Ahr,Aifm1,Aldh2,Als2,Angptl4,Anxa1,Apod,Atf6,Atg3,Atg5,Atm,Atp1b1,Atp2a2,B4galt1,Bche,Bcl3,Bid,Blmh,Brca2,C3,C3ar1,C4b,C5ar1,Camk2d,Casp4,Casp8,Cat,Cav1,Ccl2,Ccng1,Cd36,Cd44,Cdkn1a,Cerk,Cfp,Clcn3,Clec4d,Clic4,Cnnm4,Cops6,Cox15,Cx3cr1,Dclre1a,Depdc5,Dhx58,Dock2,Dusp1,Egfr,Eif2ak4,Elavl1,Enpp1,Enpp3,Erbb2,Erc1,Ercc1,F2r,F3,Fabp3,Fads1,…
MP:0003115	abnormal respiratory system development	0.00159	0.0205	92	4421	Common	Abca3,Adam17,Atmin,Bag6,Bclaf1,Bmper,Chd7,Creb1,Csk,Ctgf,Ctnnb1,Cux1,Cyld,Dicer1,Disp1,Egfr,Elavl1,Ep300,Epas1,Errfi1,Fam20b,Fbln1,Fbn1,Fbxw7,Fgfr2,Foxp2,Fstl1,Fubp1,Gak,Git1,Gli3,Hat1,Hikeshi,Hsd11b1,Ift88,Igf2r,Itga3,Itga8,Jmjd6,Kdm6b,Lama5,Lamc1,Lmnb1,Lox,Lyst,Man1a2,Mapk14,Mapk6,Met,Mmp14,Mmp2,Nabp2,Nfib,Nisch,Nr3c1,Nubp1,Ola1,Pcyt1a,Pdgfa,Pdgfra,Pecam1,Pkd2,Pkdcc,Pten,Ptk2,Ptk7,Rc3h1,Rc3h2,R…
MP:0009931	abnormal skin appearance	0.00159	0.0205	241	4421	Common	Abcb10,Adar,Aebp1,Ago2,Ahr,Angpt2,Apc,Arap3,Ate1,Atox1,Atp7a,B4galt1,Birc6,Blmh,Bmpr1a,Braf,Brd1,Cask,Casp8,Cdh5,Cdk7,Cebpb,Chd2,Chuk,Cidea,Ckap4,Clic4,Col3a1,Col5a2,Cox4i1,Crebbp,Crim1,Crkl,Ctnnb1,Ctsl,Cul4b,Dbt,Dcn,Ddrgk1,Degs1,Dgat1,Dgat2,Dhx36,Dicer1,Dpf2,Dpt,Drosha,Dst,E2f4,E4f1,Ebp,Efemp1,Efnb2,Egfr,Egln1,Eloa,Elovl1,Ern1,Erp44,Errfi1,F3,F5,Fads2,Fas,Fbln5,Fbn1,Fbxw7,Fgfr1,Fgfr2,Fn1,Fos,Fox…
MP:0013873	abnormal ductus venosus morphology	0.0016	0.0206	36	4421	Common	4933434E20Rik,Adcy9,Ahr,Anks6,Arnt,Atg16l1,Atp11a,Brd2,Capza2,Cog6,Col4a2,Coro1c,Crim1,Dmxl2,Fut8,H13,Hmgxb3,Kif1bp,Morc2a,Npat,Nsun2,Prkab1,Prmt7,Pth1r,Rala,Rpgrip1l,Setd5,Sh3pxd2a,Slc25a20,Smg9,Ssr2,Tcf7l2,Tent5c,Traf6,Trappc9,Zmynd11
MP:0008272	abnormal endochondral bone ossification	0.00163	0.021	68	4421	Common	2700049A03Rik,Alkbh1,Apc,Arid5b,Asah1,Bmp6,Chuk,Csf1r,Ctgf,Ctnnb1,Dchs1,Dicer1,Elavl1,Errfi1,Fam20c,Fat4,Fermt2,Fgfr2,Fgfrl1,Flnb,Fosl2,Ghr,Gja1,Gli3,Gsk3b,Hs2st1,Hspg2,Igf1,Kdm6b,Kif3a,Lasp1,Mbtps1,Mef2c,Mllt3,Mmp14,Nf1,Nfatc1,Nfix,Nipbl,Nov,Npr2,Npr3,Nsd2,Nsdhl,Papss2,Pds5a,Pds5b,Phf14,Pkdcc,Prickle1,Ptgs2,Rnf146,Rnf2,Serpinh1,Sfrp2,Slc26a2,Sox9,Sp3,Src,Suco,Thra,Thrb,Tmem119,Trps1,Twsg1,Wdr19,…
MP:0000778	abnormal nervous system tract morphology	0.00168	0.0215	104	4421	Common	Akt3,Als2,Ank2,Ap3b1,Ap4e1,App,Arfgef1,Arhgap35,Arhgap5,Arid1b,Atr,B4gat1,Bicd2,Bmi1,Brpf1,Cacnb3,Canx,Casp9,Cd81,Cdh2,Chd7,Chn1,Clip2,Csf1r,Ctnnb1,Dag1,Dclk1,Ebf1,Efnb1,Efnb2,Eif4h,Enah,Ext1,Fgfr1,Fgfr2,Fyn,Galc,Gli3,Hfe,Hsf1,Hspa5,Hspd1,Htt,Ireb2,Itpr3,Itsn1,Kif1b,Kif1bp,Kif3a,Map1b,Map2k4,Map3k12,March7,Marcks,Marcksl1,Mbp,Mycbp2,Napa,Ndst1,Nfia,Nfib,Nfix,Nipbl,Nmnat2,Nos2,Npc1,Nrp1,Nrp2,Ntf3,…
MP:0002270	abnormal pulmonary alveolus morphology	0.00168	0.0215	104	4421	Common	Abca1,Abca3,Adgrf5,Aff4,Aimp1,Ap3b1,Asah1,Atp7a,Atxn1l,B4galt1,Bid,Bloc1s6,Bmper,Bmpr1a,Bmpr2,Cav1,Cav2,Cebpg,Cic,Crebbp,Ctgf,Ctsa,Dkc1,Egfr,Epas1,Errfi1,Fam20a,Fbln1,Fbln5,Fbn1,Fbxw7,Fgfr2,Foxp2,Fstl1,Fut8,Grb10,Hck,Hif1a,Hps1,Hsd11b1,Hspa5,Igf1,Inpp5d,Itga3,Kmt5b,Lama5,Lipa,Lmnb1,Loxl1,Loxl3,Lpl,Lrrk2,Lyst,Lyz2,Man1a2,Mapk14,Mapk6,Mex3c,Mmp14,Nabp2,Ndst1,Nfib,Nos3,Npc1,Npc2,Nr3c1,Pcyt1a,Pdgfa,P…
MP:0002968	increased circulating alkaline phosphatase level	0.00168	0.0215	104	4421	Common	Abca6,Acox1,Adar,Adcy6,Afap1l2,Agl,Akap9,Ank,Ap4e1,Aqp1,Arrb2,Atg7,Atp6v1h,Bap1,Bpnt1,Chd9,Chn1,Clpp,Creb3l1,Ctdsp1,Cystm1,Daam2,Dclk1,Degs1,Dynll1,Eif4g2,Elk4,Faf2,Fam20c,Fam69a,Fech,Fgfr1op,Fhl1,Galk2,Glmp,Gmds,Golga3,Gse1,Hbs1l,Hdac10,Ift88,Insr,Jag1,Jak1,Leprotl1,Lmna,Lztr1,Map3k7,Miga1,Mindy1,Mta3,Mtmr3,Mtss1,Myh10,Naga,Ncoa1,Nfkb1,Notch2,Npr3,Nt5e,Nucb2,Ostm1,Per2,Pik3c2a,Pitpna,Plekhm2,Pls…
MP:0003232	abnormal forebrain development	0.0017	0.0216	112	4421	Common	Adam10,Adgra2,Adgrg1,Ago2,Ambra1,Apaf1,Aph1a,Arih2,Bcor,Braf,Brpf1,Casp9,Cdc42,Cdh2,Cdk5,Cdk5rap2,Cep63,Chd7,Crybg1,Ctbp2,Ctnnb1,Dlc1,Dlg3,Egr1,Emg1,Eml1,Enpp2,Eprs,F3,Fbxw7,Fgfr1,Fgfrl1,Gak,Gja1,Gli3,Gnb1,H13,Hif1a,Hsd17b7,Hspa5,Ift88,Ikbkap,Il6st,Itga6,Itgb1,Itpr1,Kat2a,Kat6b,Kdm6a,Lamc1,Lemd2,Lrp6,Manf,Map1b,Marcks,Mbd1,Mcph1,Med1,Mlst8,Mtor,Napa,Ncaph2,Ncor2,Ndel1,Ndst1,Nfib,Npm1,Ntrk2,Numb,O…
MP:0008595	abnormal circulating interleukin-6 level	0.0017	0.0216	75	4421	Common	Arid5a,Arrb2,Ash1l,Atg16l1,B4galt1,C3,C3ar1,C5ar1,Cav1,Cd14,Cebpb,Clic4,Ctsc,Dusp1,Elavl1,Enpp2,F3,Fos,Gba,Ghr,Hmgb1,Hspb8,Ifit2,Ifngr1,Il10ra,Il1r1,Il1rn,Il6ra,Il6st,Inpp5d,Irak2,Irak4,Irf1,Irf5,Itgb2,Lyn,Mavs,Myd88,Nckap1l,Ncoa3,Nfe2l2,Nlrx1,Peli1,Prkab1,Procr,Psmb10,Ptger4,Ptpn11,Ptpn6,Rab27a,Scarb1,Senp1,Serpine1,Sgms1,Sh3bp2,Siglec1,Sirt3,Smg1,Sod1,Spp1,Stk38,Tbc1d23,Tbk1,Tlr4,Tnfaip3,Tnfaip…
MP:0001179	thick pulmonary interalveolar septum	0.00171	0.0217	29	4421	Common	Abca3,B4galt1,Cav1,Cav2,Ctsk,Dusp1,Egfr,Epas1,Errfi1,Fbn1,Fbxw7,Hat1,Hck,Hif1a,Itga3,Kdm6b,Man1a2,Ndst1,Nos3,Npc1,Npc2,Nr3c1,Pkdcc,Robo1,Sgpl1,Slc27a4,Tie1,Trps1,Vegfa
MP:0002267	abnormal bronchiole morphology	0.00171	0.0217	29	4421	Common	Abca3,Adam17,Bag6,Egfr,Errfi1,Fbln5,Fbn1,Fgfr2,Fstl1,Hikeshi,Ifi27l2a,Igf1r,Itga3,Keap1,Lipa,Lox,Mmp14,Nfib,Nr3c1,Pten,Pura,Rbpj,Robo1,Tgfbr1,Thbs1,Timp3,Tk1,Tpm1,Yy1
MP:0009404	centrally nucleated skeletal muscle fibers	0.00171	0.0217	47	4421	Common	Adarb1,Als2,App,Col6a1,Col6a3,Cox15,Cryab,Ctss,Dag1,Des,Dmd,Dnm2,Dysf,Fhl1,Fkrp,Flnc,H6pd,Hspb7,Hspg2,Itga7,Lama2,Lamc1,Large1,Lmna,Mbnl1,Mbnl2,Mmp14,Mtm1,Mtor,Pabpn1,Pfkm,Pik3r4,Plec,Pomgnt1,Samd4,Selenon,Sgcb,Sgcg,Sod1,Syne1,Tcap,Tgfbr2,Tln2,Trim32,Vapb,Vcp,Zfp106
MP:0010465	aberrant origin of the right subclavian artery	0.00171	0.0217	29	4421	Common	4933434E20Rik,Acvr1,Brd2,Chrd,Cmip,Col4a2,Crkl,Ece1,Ednra,Eya1,Fbln1,Gata6,H13,Hand2,Hprt,Jag1,Kat6a,Morc2a,Myo9a,Nsun2,Pdgfra,Plxnd1,Prmt7,Rala,Sec24b,Tcf7l2,Tgfb2,Tgfbr2,Vegfa
MP:0010067	increased red blood cell distribution width	0.00176	0.0222	50	4421	Common	Adgrf5,Ago2,Arpc1b,Bnip3l,Cdk5rap2,Chordc1,Cpox,Dbn1,E2f4,Ep300,Exoc6,Fbxo7,Fech,Galnt18,Hbs1l,Hk1,Hmox1,Ireb2,Jak1,Jak2,Klf3,Lig1,Lpin2,Lztr1,Man2a1,Mcat,Nfe2l2,Npm1,Nprl3,Pdgfrb,Picalm,Pld3,Prdx1,Prkaa1,Prkab1,Prkag1,Prkg1,Rb1cc1,Runx1,Slc11a2,Slc25a30,Slc40a1,Stat5b,Trf,Ttc28,Ttc7,Ulk1,Uros,Vps13c,Wars
MP:0004967	abnormal kidney epithelium morphology	0.00177	0.0223	39	4421	Common	Alms1,Arhgap35,Arl13b,Atmin,Atp6ap2,Bbs4,Cc2d2a,Cep290,Cplane1,Ctnnd1,Dcn,Ddr1,Dicer1,Fan1,Flcn,Galc,Gcnt2,Gstz1,Ift140,Ift20,Ift88,Itgb1,Kif3a,Lamb2,Lin7c,Lzts2,Man2b1,Naglu,Nfat5,Nos3,Nphp3,Prdx6,Rrm2b,Sod2,Tgfb2,Tlr4,Tmem67,Ttc21b,Wwtr1
MP:0008844	decreased subcutaneous adipose tissue amount	0.00177	0.0223	56	4421	Common	Acacb,Angptl2,Ap1s2,Arhgap5,Atf3,Atm,Atr,B4galt1,Bag3,Bscl2,C1qtnf1,Cav1,Ccdc3,Cdc73,Cdk7,Cdkal1,Chd2,Cisd2,Cnot3,Col5a3,Dgat2,Dhcr24,Ebf1,Efemp1,Ercc1,Fabp5,Fbn1,Fmo5,Lbr,Lipa,Lipe,Lmna,Mapk8,Mbd5,Mcat,Memo1,Mpv17,Npy1r,Odc1,Phf2,Plin2,Ppard,Pparg,Ppp6c,Ptpn11,Serpine1,Sh3kbp1,Sh3pxd2b,Sik3,Sqstm1,Ssfa2,Supv3l1,Tgfb1,Tgfbr1,Trp53,Zmpste24
MP:0010592	abnormal atrioventricular septum morphology	0.00177	0.0223	53	4421	Common	Acvr1,Adamts6,Anks6,Ap2b1,Bicc1,Bmp4,Bmpr2,Brd2,Cc2d2a,Cep290,Cplane1,Cyr61,Dock1,Dync2h1,Ehmt1,Ep300,Epha3,Evl,Fuz,Ift140,Ift172,Ift74,Kat6a,Lama5,Lrp1,Mapk7,Megf8,Myh10,Ndst1,Nr1d2,Nxn,Pcnt,Pcsk5,Pdgfrb,Pds5a,Pds5b,Pepd,Pkd2,Plxnd1,Ptpn11,Qsox1,Smarca4,Smg9,Snx17,Spry2,Srsf10,Ssr2,Tgfb2,Tmem67,Trappc10,Wnt5a,Zbtb14,Zfpm2
MP:0000163	abnormal cartilage morphology	0.00179	0.0226	174	4421	Common	2700049A03Rik,Acan,Acvr1,Adam17,Adamts5,Ank,Apc,Arid5b,Asah1,Atf2,Atp11a,Atp6v1h,Atp7a,Bmper,Bmpr1a,Bmpr1b,Cav1,Cdc42,Chrd,Chsy1,Chuk,Col12a1,Col27a1,Creb3l2,Crim1,Crtap,Csf1,Csf1r,Ctgf,Ctnna1,Ctnnb1,Ctsk,Ctsl,Ddrgk1,Derl2,Dicer1,Disp1,Dusp6,Dym,Ebf1,Ebf2,Ece1,Edn1,Ednra,Ednrb,Efnb1,Enpp1,Erg,Errfi1,Esr1,Evc2,Ext1,Ext2,Eya1,Fam20c,Fbln1,Fbn1,Fermt2,Fgfr1,Fgfr2,Fgfrl1,Flnb,Fmod,Fos,Fosl2,Fstl1,Fuz…
MP:0000106	abnormal basisphenoid bone morphology	0.00181	0.0227	34	4421	Common	Apaf1,Bmper,Brd2,Cdon,Chrd,Coro1c,Ctnnb1,Dhx35,Disp1,Ednra,Eya1,Fgfr1,Fgfr2,Fgfrl1,Foxn3,Gli3,Hmgxb3,Kif3a,Ltbp1,Ltbp3,Mn1,Morc2a,Nsun2,Pdgfra,Pkdcc,Rpgrip1l,Sh3pxd2a,Smg9,Smo,Sox9,Sp3,Ssr2,Tcf7l2,Zeb1
MP:0009940	abnormal hippocampus pyramidal cell morphology	0.00181	0.0227	34	4421	Common	Aldh2,Arpc3,Atg7,Atrx,C1qa,Cadps,Cd81,Ckap5,Clcn3,Cln3,Csf1,Ctnnd1,Dlg4,Dpysl3,Ehmt1,Ei24,Eif4ebp2,Fmr1,Fyn,Hdac2,Ireb2,Kalrn,Lyst,Mecp2,Ndel1,Pten,Scyl2,Spg11,Ssb,Stam,Tsc2,Tuba1a,Usp14,Ywhaz
MP:0010959	abnormal oxidative phosphorylation	0.00181	0.0227	34	4421	Common	Abcg2,Aifm1,Cisd1,Coq9,Dnajc15,Dnm1l,Hspd1,Lacc1,Lclat1,Lmna,Mterf3,Mtfr1,Ndufs4,Nr2f2,Pabpn1,Pex5,Pink1,Pnpt1,Ppard,Ptcd2,Rpl13a,Sod2,Sqstm1,Sucla2,Tfam,Tgm2,Thra,Tk2,Trap1,Trp53inp1,Tspo,Zfp106,mt-Co1,mt-Nd6
MP:0001845	abnormal inflammatory response	0.00182	0.0227	568	4421	Common	Abca1,Abcb1a,Abcc1,Abcc4,Abcg2,Abhd5,Acan,Ace,Ackr3,Acox1,Acvr1,Adam17,Adam8,Adamts5,Adm,Ahi1,Ahr,Aif1,Aimp1,Akap12,Akna,Alms1,Alox5ap,Als2,Amfr,Angptl2,Ank,Anxa1,Anxa5,Anxa7,Apc,App,Arhgap25,Arid5b,Arih2,Arl3,Arrb2,Ash1l,Atf2,Atf3,Atg16l1,Atp7a,Atr,B2m,B4galt1,Bap1,Bcl6,Bcr,Bgn,Bid,Bin1,Birc3,Blmh,Bloc1s6,Bmi1,Bmpr1a,Bmx,Btk,C1qa,C3,C3ar1,C4b,Cacna1c,Camk2g,Cap2,Casp3,Casp4,Casp8,Cav1,Ccl2,Ccm2,…
MP:0005028	abnormal trophectoderm morphology	0.00184	0.0229	69	4421	Common	Abcb7,Alkbh1,Arnt,Atrx,Bptf,Cdk12,Chm,Cops2,Csnk2b,Ctcf,Cul3,Cul4b,Cul7,Cxxc1,Ddx3x,Dhx9,Dnm1l,Egfr,Egln1,Ehmt2,Elavl1,Enpp2,Ets2,Fbxl5,Fgfr2,Gab1,Gnl3,Hgf,Il11ra1,Itgb3,Itgb7,Kdm6a,Lamb1,Map2k1,Mapk1,Mapk14,Med1,Met,Mfn2,Mga,Mtor,Nbn,Ncoa6,Nf2,Nr2f2,Pbrm1,Pikfyve,Pmm2,Pnpla6,Pparg,Ppp1r8,Ptpn11,Rangap1,Rptor,Rybp,Senp2,Smad2,Smad4,Smchd1,Snx13,Ssb,Syde1,Terf1,Tfdp1,Trim28,Trrap,Txnrd1,Vps53,Zpr1
MP:0008181	increased marginal zone B cell number	0.00187	0.0233	27	4421	Common	Adpgk,Bcl3,Birc3,Cd72,Cyld,Eps15,Fas,Fli1,Irf8,Kdelr1,Magt1,Map3k14,Notch2,Prkcd,Pten,Ptprj,Rgs1,Rnf10,Sh3bp2,Siglec1,Slc25a28,Spen,Tbrg1,Tlr8,Tnfsf13b,Traf3,Traf3ip2
MP:0008011	intestine polyps	0.00188	0.0234	15	4421	Common	Apc,Braf,Ctnnb1,Itgb1,Mcm2,Msh2,Pdgfra,Ppard,Prkdc,Pten,Sav1,Smad4,Smo,Stat3,Trp53
MP:0009862	abnormal aorta elastic tissue morphology	0.00188	0.0234	15	4421	Common	Acadm,Acta2,Atp7a,Col3a1,Des,Emilin1,Fbln5,Fbn1,Lox,Lrp1,Mgp,Poldip2,Slc2a10,Tgfbr1,Tgfbr2
MP:0008075	decreased CD4-positive, alpha beta T cell number	0.00189	0.0235	152	4421	Common	4933434E20Rik,Acp2,Adam10,Aldh2,Ap1g1,Arhgef1,Arhgef6,Arid5a,Atg3,Atg5,Atm,Bcl6,Becn1,Cadm1,Casp8,Ccr1,Cd274,Cd74,Cd83,Cd84,Cd86,Cdkal1,Chd9,Ciita,Clpp,Cnot4,Coro1a,Crebbp,Ctcf,Ctsl,Cxcr4,Cyld,Dck,Dctn1,Ddah1,Def6,Dennd1b,Denr,Diaph1,Dicer1,Dll4,Dock2,Dock8,Elavl1,Elk4,Elmo1,Esr1,Ets1,Fas,Fbf1,Fbxo7,Fos,Foxp1,Gmds,Gnai2,Grb2,H2-Aa,H2-Ab1,H2-DMa,Hax1,Hnrnpl,Hnrnpll,Id3,Idh1,Ifngr1,Ikbkb,Il21r,Il4r…
MP:0010287	increased reproductive system tumor incidence	0.0019	0.0235	42	4421	Common	Apc,Atad5,Atm,Bap1,Bin1,Brca2,Ccdc80,Cdc73,Cdk5rap2,Cdkn1a,Cdkn1b,Cdkn2c,Cop1,Ctnnb1,Cul9,Dclre1a,Errfi1,Fbxo4,Foxo3,Htatip2,Kitl,Ldah,Mcm9,Mlh1,Msh2,Msh6,Nbn,Ndrg2,Pcsk6,Pik3ca,Pten,Rint1,Sav1,Sirt2,Smad4,Sptbn1,Tgfbr2,Tom1l2,Trim37,Trp53,Tsc2,Zfhx3
MP:0002066	abnormal motor capabilities/coordination/movement	0.00191	0.0237	1067	4421	Common	2310022B05Rik,4932438A13Rik,Aars,Abca3,Abca5,Abcb1a,Abcd1,Abcd4,Abcg2,Abhd12,Abtb2,Acadvl,Acan,Acbd3,Ackr3,Acot13,Acot7,Acp2,Acvr1,Adamts7,Adarb1,Adcy3,Adcy5,Adgrf5,Adgrg1,Adgrg6,Adgrl2,Adgrl3,Adipor2,Adk,Adm,Aebp2,Afap1l2,Aff1,Aga,Agap1,Agl,Ago1,Agtpbp1,Ahi1,Ahr,Aifm1,Akap11,Akap12,Akna,Akr1b8,Aktip,Aldh2,Als2,Ank,Ank2,Ank3,Ankib1,Ankrd1,Ankrd11,Ankrd27,Ap1g1,Ap1s2,Ap2b1,Ap3b1,Ap4e1,Apaf1,Apba1,…
MP:0008022	dilated heart ventricle	0.00192	0.0237	98	4421	Common	Acadvl,Ackr3,Adam19,Adgrg6,Adipoq,Aifm1,Atg5,Atp2a2,Baz1b,Bcl6,Cacna1c,Cap2,Capns1,Cav1,Cdh2,Cenpf,Col1a2,Crk,Des,Dicer1,Dnaja3,Dusp7,Edn1,F2r,Fbln5,Fbn1,Fgfr1,Gab1,Gas2l3,Gja1,Gnaq,Hand2,Hccs,Hdac3,Hmox1,Hoxa3,Igf2r,Itgb1,Jup,Klf15,Lama4,Lig3,Lmna,Lrp1,Map3k7,Mapkap1,Mdm4,Med1,Mef2a,Mef2c,Mkl1,Mmp2,Myh11,Nae1,Nexn,Nos3,Npr1,Nprl3,Nr3c1,Ntf3,Pdgfb,Pdgfrb,Pdlim3,Pdlim5,Phc1,Pikfyve,Plce1,Plrg1,Ppp…
MP:0000558	abnormal tibia morphology	0.00194	0.024	118	4421	Common	2700049A03Rik,Acsl4,Acvr1,Adgrf5,Agl,Akap11,Aktip,Ankib1,Ankrd27,Arid5b,Ascc3,Atad2b,Atp2b1,Atp6v0d1,Atxn7l3,Bnip2,Cd44,Chd2,Col4a3bp,Csf1,Ctgf,Ctsk,Cyp51,Ddr2,Dym,Ebf2,Egr1,Epdr1,Esr1,Evc2,Fam20a,Fam49b,Fbn1,Fbxl22,Fermt2,Fgfr1,Fgfr2,Flnb,Ghr,Gli3,Hhipl1,Ift172,Il6st,Iqce,Irs1,Islr,Itga10,Itgb1,Klf10,Lgmn,Limk2,Lnpk,Lrrk1,Mapk14,Mapkapk2,Mbd5,Med25,Mef2c,Mex3c,Mxra7,Nabp2,Nfatc1,Nfxl1,Npr2,Nxn,O…
MP:0009939	abnormal hippocampus neuron morphology	0.00201	0.0247	60	4421	Common	Abcb1a,Aldh2,Ank3,App,Arpc3,Atg7,Atrx,Bmi1,Brpf1,C1qa,Cadps,Cav1,Cd81,Ckap5,Clcn3,Cln3,Csf1,Cst3,Ctnnb1,Ctnnd1,Ctsd,Dlg4,Dpysl3,Ehmt1,Ei24,Eif4ebp2,Fmr1,Fyn,Gba,Hdac2,Hif1a,Inpp4a,Ireb2,Kalrn,Lyst,Mecp2,Ndel1,Nedd9,Nrp2,Nsdhl,Plcb1,Ppt1,Prkab1,Pten,Ptpn11,Rere,Rnf19a,Scyl2,Slc12a6,Spg11,Ssb,Stam,Stambp,Tsc2,Tspan7,Tuba1a,Uqcrfs1,Usp14,Ywhaz,Zfp521
MP:0001191	abnormal skin condition	0.00202	0.0248	127	4421	Common	Abcg2,Acvr1b,Adam17,Adamts2,Ahr,Angpt2,Apc,Arrdc3,Ate1,Atp7a,Atr,B4galt1,Bdnf,Calcrl,Casp8,Cd47,Cdkn1a,Chuk,Ctsl,Dcn,Dgat1,Diaph1,Dicer1,Dnm1l,Dpt,E4f1,Egfr,Enpp1,Ercc1,Ercc5,Errfi1,Fas,Fbn1,Fech,Fgfr2,Fos,Fyn,Gadd45a,Gba,Gcnt2,Gja1,Gli3,Gnptab,Gorab,Hdac1,Hgf,Hmgn1,Hr,Htt,Ikbkb,Il17ra,Il1rn,Itga3,Itga6,Itgb1,Itgb2,Itgb4,Jdp2,Jmjd6,Kat6a,Kifap3,Kmt2a,Lamtor2,Lbr,Lrig1,Lrp6,Lum,Mib1,Mpv17,Neu1,Nfk…
MP:0008111	abnormal granulocyte differentiation	0.00202	0.0248	25	4421	Common	Adam10,Dicer1,Gab2,Git2,Ikzf1,Il10rb,Il17ra,Inpp5d,Kmt2e,Lbr,Ndst2,Nfkbia,Npm1,Nras,Patz1,Pla2g4a,Ptprc,Rac2,Runx1,Senp1,Sh2b3,Sin3b,Spi1,Stat5a,Stat5b
MP:0010299	increased mammary gland tumor incidence	0.00202	0.0248	37	4421	Common	Apc,Bap1,Becn1,Bin1,Brca2,Cav1,Cdc37,Cdkn2c,Ctnnb1,Dkc1,Erbb2,Esr1,Ets2,Etv6,Fbxo4,Gpx7,Hgf,Mcm4,Met,Mnt,Msh2,Nbn,Nf2,Notch4,Pik3ca,Prdx1,Pten,Rev3l,Rint1,S100a4,Sirt2,Smarca4,Stat1,Stk3,Tom1l2,Trp53,Tsg101
MP:0010368	abnormal lymphatic system physiology	0.00202	0.0248	37	4421	Common	4933434E20Rik,Adcy9,Atg16l1,Brd2,Capza2,Col4a2,Coro1c,Cpt2,Crim1,Dmxl2,Efnb2,Flt4,Fut8,H13,Heg1,Hmgxb3,Kif1bp,Lyve1,Morc2a,Myo9a,Npat,Nrp2,Ogdh,Ppp1r13b,Prmt7,Pth1r,Rala,Sema3f,Setd5,Sh3pxd2a,Smg9,Tent5c,Tie1,Traf6,Trappc9,Xpnpep1,Zmynd11
MP:0011439	abnormal kidney cell proliferation	0.00202	0.0248	25	4421	Common	Alms1,Arl13b,Bag6,Ctnnb1,Ctnnd1,Dicer1,Fas,Fat4,Fgfrl1,Flcn,Gadd45a,Ift140,Ift20,Itgb1,Mef2c,Mmp14,Mta2,Mtss1,Nfe2l2,Nos3,Notch2,Pdgfrb,Pkd2,Rrm2b,Ttc21b
MP:0002596	abnormal hematocrit	0.00203	0.0248	140	4421	Common	Abca6,Ace,Aco1,Acvrl1,Adam10,Adam17,Add1,Adgrf5,Ago2,Apc,Appl1,Appl2,Arnt,B4galt1,Bnip3l,C9orf72,Cd47,Chd2,Chn1,Ciapin1,Cog2,Col4a1,Col4a2,Cp,Cul4a,Dctn5,Dkk3,Dock10,Dpy19l3,E2f4,Egln1,Elk4,Epas1,Epb41,Exoc6,Fbln1,Fbxo7,Fech,Fgfrl1,Fli1,Frzb,Gapdh,Gba,Gpi1,Gpr183,Hk1,Hmox1,Idh1,Ikzf1,Inhba,Ireb2,Irf8,Itgb1,Itgb3,Itgb5,Jak2,Jmjd6,Kitl,Kmt2e,Lama4,Ldha,Lgmn,Lig1,Mapre3,Mcat,Mcl1,Mcm3,Miga2,Mtus1,My…
MP:0000921	demyelination	0.00206	0.0251	54	4421	Common	Arsa,Aspa,Bace1,C3ar1,Canx,Cd300lf,Cd59a,Cd86,Cisd2,Coq9,Cp,Csf1r,Cx3cr1,Dag1,Dst,Eif2b5,Erbb2,Fas,Fdft1,Fgd4,Fig4,Galc,Gars,Gnptab,H2-D1,Hsd17b4,Hspg2,Itgav,Lama2,Lamc1,Litaf,Lmnb1,Lpin1,Mbp,Mnat1,Ndrg1,Npc1,Ntrk2,Pex7,Pitpna,Pmp22,Psap,Qk,Rheb,S1pr1,Scarb2,Sept8,Slc12a6,Slc17a5,Slc33a1,Smarcb1,Stmn1,Tpp1,Vps54
MP:0002407	abnormal double-negative T cell morphology	0.00206	0.0251	84	4421	Common	Aff1,Apc,Atm,Bcl10,Bhlhe40,Bmi1,Cbl,Ccnd3,Cdk6,Chd4,Ctcf,Dck,Dnajc11,E2f4,Elavl1,Ets1,Ezh2,Fas,Fbxw7,H2-Ab1,Hnrnpl,Igbp1,Ikzf1,Il6st,Il7r,Jak1,Kat6a,Kitl,Kmt2e,Lcp2,Maml1,Map3k3,Mapk14,Mcl1,Mcm4,Msi2,Nampt,Ncaph2,Nckap1l,Nfatc1,Nfatc3,Nfkb2,Nfkbia,Nfkbie,Nkap,Noc2l,Notch3,Pbx1,Phf20,Pknox1,Pnp,Ppp4c,Prkch,Prkdc,Prnp,Ptprc,Rad50,Rbpj,Rictor,Rnf168,Rpl22,Runx1,Sept9,Shc1,Smarca4,Sos1,Spi1,Stat5b,Su…
MP:0004686	decreased length of long bones	0.00207	0.0252	163	4421	Common	2700049A03Rik,Acan,Acvr1,Adam17,Adgrf5,Akap11,Aktip,Ank,Ankib1,Ankrd27,Arid5b,Atp2b1,Atp6v0d1,Atxn7l3,Bbx,Bgn,Bmpr1a,Bmpr1b,Cd44,Chd2,Col12a1,Col27a1,Cplane1,Creb3l2,Crtap,Csf1,Csf1r,Ctnnb1,Ctsk,Ddr2,Dym,Ebf2,Egr1,Epdr1,Esr1,Evc2,Fam20a,Fam49b,Fbn1,Fbxl22,Fermt2,Fgfr1,Fgfr2,Fgfrl1,Fig4,Flnb,Fos,Gas1,Ghr,Gli3,Gusb,H13,Hif1a,Hsd17b7,Hspg2,Ibsp,Ick,Ift172,Ift80,Ift88,Il6st,Impad1,Inpp5d,Iqce,Irs1,It…
MP:0001855	abnormal atrial thrombosis	0.00214	0.0259	23	4421	Common	Ackr3,Ahr,Cdc42,Cryab,Dicer1,E2f3,Gnaq,Hccs,Itgb1,Jup,Map3k7,Myh10,Myocd,Nr3c1,Phc1,Ptpn11,Rce1,Ryr2,Stat3,Tgfb1,Tmod1,Tpm1,Yap1
MP:0004160	retroesophageal right subclavian artery	0.00214	0.0259	23	4421	Common	4933434E20Rik,Acvr1,Brd2,Chrd,Cmip,Col4a2,Eya1,Fbln1,Gata6,H13,Hand2,Hprt,Jag1,Kat6a,Myo9a,Nsun2,Pdgfra,Prmt7,Rala,Sec24b,Tcf7l2,Tgfbr2,Vegfa
MP:0008000	increased ovary tumor incidence	0.00214	0.0259	23	4421	Common	Apc,Atad5,Atm,Bap1,Bin1,Ccdc80,Cdk5rap2,Cdkn1b,Ctnnb1,Cul9,Dclre1a,Foxo3,Htatip2,Mcm9,Pcsk6,Pten,Rint1,Sav1,Smad4,Sptbn1,Tom1l2,Trim37,Trp53
MP:0011065	abnormal kidney epithelial cell primary cilium morphology	0.00214	0.0259	17	4421	Common	Alms1,Arhgap35,Arl13b,Bbs4,Cc2d2a,Cep290,Cplane1,Ctnnd1,Dicer1,Ift140,Ift20,Ift88,Kif3a,Nphp3,Tmem67,Ttc21b,Wwtr1
MP:0013024	abnormal Ly6C low monocyte number	0.00214	0.0259	23	4421	Common	4933434E20Rik,Acbd5,Agap1,Ap4e1,Bnip2,Clpp,Fam92a,Galnt18,Gmds,Ifnar1,Irf5,Klf4,Ldlrad4,Metrnl,Myo10,Nr4a1,Pycr2,Sap130,Setd5,Slu7,Tead3,Tmem127,Usp5
MP:0020040	decreased bone ossification	0.00214	0.0259	23	4421	Common	Adipoq,Alkbh1,Ano6,Atp6v1h,Bmpr1a,Cebpb,Col12a1,Creb3l1,Crtap,Esr1,Flnb,Fosl2,Fstl1,Gba,Ifngr1,Igf1r,Itgb2,Kdm6b,Mgp,Naca,Plekhm1,Rnf146,Slc39a14
MP:0000484	abnormal pulmonary artery morphology	0.00218	0.0262	40	4421	Common	Acvrl1,Adam19,Bmp4,Bmpr2,Cav1,Cavin2,Cdo1,Cntrl,Cplane1,Ctnnb1,Ddah1,Dync2h1,Epas1,Ephb4,Fgfr2,Fosl2,Fuz,Gja5,Hand2,Ift88,Jmjd6,Lama5,Lox,Map2k1,Mgp,Nos3,Notch2,Nprl3,Nrp1,Ntf3,Pdgfrb,Plvap,Pparg,Ptger4,Ptk7,Rere,Smo,Tgfb2,Vegfa,Wnt5a
MP:0000702	enlarged lymph nodes	0.00218	0.0262	92	4421	Common	Ap4e1,Arhgef6,Asah1,B3gnt5,Bhlhe40,Birc3,C9orf72,Casp8,Cbl,Cd200,Cd86,Cdkn1a,Cdkn2c,Cebpb,Chd2,Ciz1,Coro1a,Ctsl,Cyld,Ddost,Def6,Dennd1b,Dicer1,Drosha,Ep300,Ezh2,Fas,Fcgr2b,Foxo1,Foxo3,Gtpbp2,H2-Aa,Hmox1,Ifi44,Ikzf1,Il6st,Inpp5d,Irf2,Irf8,Itch,Itgal,Itgb2,Lbr,Lgals9,Lpin2,Lyn,Man2b2,Map3k14,Map3k7,Mark2,Mcm4,Mgat2,Nfatc2,Nfe2l2,Nfkb1,Nfkb2,Nfkbiz,Notch3,Peli1,Pik3c2a,Pim1,Pmm2,Ppp2ca,Prkcd,Prkch,P…
MP:0003395	abnormal subclavian artery morphology	0.00218	0.0262	40	4421	Common	4933434E20Rik,Acvr1,Brd2,Chd7,Chrd,Cmip,Col4a2,Crkl,Dhx35,Ece1,Edn1,Ednra,Ermp1,Eya1,Fbln1,Gata6,H13,Hand2,Hprt,Jag1,Kat6a,Lama5,Mgrn1,Morc2a,Myo9a,Nsun2,Pdgfra,Pdgfrb,Plxnd1,Polb,Prmt7,Qsox1,Rala,Rere,Rpgrip1l,Sec24b,Tcf7l2,Tgfb2,Tgfbr2,Vegfa
MP:0001625	cardiac hypertrophy	0.00221	0.0265	120	4421	Common	Abca1,Acan,Ackr3,Adamts6,Adipoq,Adm,Aifm1,Akap6,Ap2b1,Arhgef1,Atp1a2,Atp1b1,Atp2a2,Bicral,Bmp4,Bmpr2,Braf,Cacna1c,Camta2,Cav1,Ccdc134,Cd36,Chrd,Cnot3,Cryab,Ctsl,Des,Dusp6,Egfr,Erbb2,Erg,Fabp3,Fbn1,Fnip1,Fstl1,Fubp1,Fxyd1,Gja1,Gla,Gnaq,Gucy1a1,Hand2,Hdac3,Hdac5,Hdac9,Hif1a,Hmga1,Hprt,Hspb8,Ier3,Inpp5f,Itgb3,Jag1,Jup,Klf15,Klf3,Lama4,Lmna,Lox,Map2k1,Map2k3,Map3k7,Mapk1,Mapk14,Mapk3,Mapk7,Mef2c,Mtpn…
MP:0000748	progressive muscle weakness	0.00223	0.0267	21	4421	Common	Des,Dnajc11,Dnajc5,Dysf,Galc,Gas7,Gnptab,Itgb1,Kif1b,Lama2,Lmna,Mtm1,Psap,Ptrh2,Sgcg,Sod1,Tbce,Vcp,Vegfa,Vps54,Zmpste24
MP:0012253	abnormal intersomitic vessel morphology	0.00223	0.0267	21	4421	Common	Acvrl1,Adam10,Cdh5,Efnb2,Eng,Flna,Foxo1,Hif1a,Krit1,Mapk7,Metap2,Mib1,Pdcd10,Pik3ca,Plxnd1,Poglut1,Ptprb,Ptprj,Rasa1,Wasf2,Zfp36l1
MP:0000754	paresis	0.00224	0.0267	19	4421	Common	Atp7a,Cd86,Cln6,Cln8,Cx3cr1,Dbnl,Dst,Galc,Lama2,Mbp,Ncor2,Nek7,Notch3,Pex5,Prnp,Ptpn9,Sncg,Spg20,Vegfa
MP:0003948	abnormal gas homeostasis	0.00224	0.0267	268	4421	Common	Abca3,Abcc9,Abhd5,Acacb,Acad8,Acadvl,Ackr3,Acot13,Acss1,Adam17,Adamts7,Adcy3,Adipoq,Akap9,Aldh1a3,Angptl2,Ap4e1,Arhgef11,Arrdc3,Asl,Atf2,Atf3,Atxn1l,Bckdk,Bcl3,Bclaf1,Braf,Brd2,Bscl2,Caprin1,Cav1,Cbl,Ccar2,Ccdc80,Ccny,Ccr1,Cd300lf,Cdk5,Cept1,Ces1d,Chrd,Cisd2,Clec16a,Clip3,Clk2,Cnot3,Cpe,Crebbp,Crtc3,Cspg4,Cux1,Cxcr4,Cyld,Cystm1,Daam1,Ddah1,Dgat1,Dlg1,Dock1,Dok1,Dusp1,Dvl2,Edn1,Ednrb,Egfr,Egln2,Eh…
MP:0003974	abnormal endocardium morphology	0.00224	0.0267	19	4421	Common	Abi1,Acvrl1,Adgrg6,Ctnnb1,Efnb2,Eng,Ephb4,Flrt2,Fn1,Mapk7,Mef2c,Pdcd10,Pik3ca,Ptk2,Ptprj,Smad6,Tie1,Tsc2,Wasf2
MP:0008081	abnormal single-positive T cell number	0.00228	0.0271	61	4421	Common	Aff1,Arid5b,Atm,Caml,Cbl,Cdk6,Cflar,Cops5,Ctcf,Diaph1,Dock10,Dock2,Elavl1,Elk4,Ep300,Fbxw7,Foxo1,Gnai2,H2-Ab1,Hax1,Hivep2,Htra2,Ikbkb,Il6st,Lcp2,Map3k3,Map3k7,Mcl1,Nfkb1,Nfkbia,Nmt1,Nmt2,Noc2l,Nos2,Npy1r,Nr3c1,Pknox1,Pnp,Ppp3cb,Ppp4c,Prkdc,Ptpn2,Ptprc,Rbpj,Rfx5,Rictor,Runx1,Sept9,Sesn1,Sgpl1,Shc1,Smarca4,Stk17b,Stk4,Tnfsf13b,Tpp2,Twsg1,Vav1,Xrcc6,Zeb1,Zfp335
MP:0000781	decreased corpus callosum size	0.00229	0.0272	30	4421	Common	Akt3,Ank2,Ap4e1,App,Arhgap5,Arid1b,Bicd2,Brpf1,Clip2,Ctnnb1,Eif4h,Fyn,Hfe,Map1b,Map2k4,Map3k12,Mycbp2,Nipbl,Npc1,Pdha1,Pfdn1,Plaa,Robo1,Rpgrip1l,Slc12a6,Slc33a1,Suz12,Tubb5,Usp14,Wasl
MP:0008554	decreased circulating tumor necrosis factor level	0.00229	0.0272	30	4421	Common	Adam17,Arid5a,C3,Cd14,Cd44,Clic4,Enpp2,F3,Foxo1,Gba,Ifit2,Ifngr1,Ikbkb,Il6ra,Irak2,Irak4,Irf5,Lacc1,Mapkapk2,Mif,Myd88,Npy1r,Parp1,Peli1,Prkce,Rhbdf2,Sgms1,Siglec1,Tlr2,Tradd
MP:0008273	abnormal intramembranous bone ossification	0.00231	0.0274	35	4421	Common	Alkbh1,Apaf1,Cdc42,Ctnna1,Ctnnb1,Ehmt1,Fam20c,Fermt2,Fgfr1,Fgfr2,Fgfrl1,Flnb,Foxn3,Fuz,Gja1,Hdac8,Ibsp,Kat6b,Lrp6,Mmp14,Nipbl,Pdgfra,Pds5a,Pex2,Rnf146,Sik3,Sp3,Stag1,Suco,Tent5a,Tgfbr1,Thra,Thrb,Twsg1,Wls
MP:0005562	decreased mean corpuscular hemoglobin	0.00236	0.0279	46	4421	Common	Add1,Adgrf5,Ago2,Ap4e1,Atp6v1b2,Cp,Epb41,Eps15,Exoc6,G6pdx,Gpi1,Hk1,Ireb2,Itch,Kdm5c,Lgmn,Myl12b,Nprl3,Nsun2,Pacsin2,Picalm,Pld3,Ppp1r15a,Prkaa1,Prkab1,Prkag1,Pxylp1,Rab5c,Rhbdf1,Sgms1,Slc11a2,Slc20a1,Slc40a1,Slc7a1,Smc3,Sqstm1,Stat1,Stat5b,Steap3,Tent5c,Tfrc,Usp21,Vps33b,Wars,Zfp106,Zmynd8
MP:0010678	abnormal skin adnexa morphology	0.00237	0.0281	464	4421	Common	4930453N24Rik,Aars,Acacb,Acp2,Acvr1b,Adam17,Adamts2,Aebp1,Afap1l2,Aga,Ahr,Aifm1,Aldh2,Angptl2,Anpep,Anxa6,Ap1s2,Ap3b1,Apc,Arcn1,Arhgap1,Arhgap5,Arid4a,Arnt,Arpc2,Arpc4,Ash1l,Asl,Ate1,Atf3,Atm,Atp2a2,Atp2b1,Atp7a,Atr,Atrn,B4galt1,Bag3,Bap1,Bckdk,Bcl7a,Bdnf,Becn1,Bin1,Bloc1s5,Bloc1s6,Bmpr1a,Braf,Brca2,Brd7,Bscl2,Btd,C1qtnf1,Cask,Cast,Cat,Cav1,Cbl,Cbx7,Cc2d2a,Ccdc3,Ccdc77,Cd109,Cd34,Cd44,Cdc123,Cdc3…
MP:0002494	increased IgM level	0.00239	0.0282	68	4421	Common	Abcb1a,Ash1l,B2m,Bax,Birc3,Btk,Cd22,Cd72,Cd81,Ciita,Cxcr4,Dkk3,Fas,Fcgr2b,Fyn,Gadd45a,Ggta1,Gnai2,Grb2,H2-Ab1,Ifih1,Ikbkb,Il6st,Inpp5d,Itgb2,Jak1,Lama2,Lama5,Ly86,Lyn,Man2a1,Mavs,Nedd4,Nfatc1,Nfe2l2,Nfkb2,Nfkbie,Nipal3,Npy1r,Pik3ap1,Pik3c2a,Plcl2,Pparg,Prkcd,Prkdc,Pten,Ptgs2,Ptpn22,Ptpn6,Rac2,Rftn1,Rnf128,Spi1,Tank,Tbk1,Tgfbr2,Tlr8,Tnfaip3,Tnfrsf21,Tnfsf13b,Tnip1,Traf3,Trove2,Vsir,Was,Wipf1,Zc3h1…
MP:0011888	abnormal circulating total protein level	0.00239	0.0282	49	4421	Common	Abca6,Akap9,Aldh2,Amfr,Aqp1,Arpc4,Baz1b,Boc,Cacybp,Dbn1,Eftud2,Elk4,Esco1,Fas,Fkbp9,Foxo4,Ggnbp2,Gse1,Hbs1l,Hsd17b11,Itch,Jak1,Kif21b,Lamb2,Ltbp1,Mgat2,Miga2,Myl12b,Neu1,Pear1,Pex3,Pikfyve,Plvap,Rab5c,Rnf10,Scube3,Sema3f,Slc38a10,Snip1,Sptbn1,Tbc1d2b,Tmem167,Tmem189,Tns2,Ubr1,Usmg5,Usp24,Usp54,Zmpste24
MP:0001800	abnormal humoral immune response	0.0024	0.0282	276	4421	Common	Abcb1a,Acsl3,Adcy9,Akap13,Aoah,Arhgef1,Arhgef6,Ash1l,Atf3,Atm,Atmin,B2m,B3gnt5,Bax,Bbs4,Bbx,Bcl10,Bcl2l1,Bcl3,Bcl6,Bhlhe40,Birc3,Blnk,Bmi1,Bst1,Btk,C3,C3ar1,C4b,C5ar1,Cabin1,Casp8,Ccl2,Ccr1,Ccr5,Cd180,Cd1d1,Cd22,Cd274,Cd36,Cd37,Cd55,Cd59a,Cd72,Cd74,Cd81,Cd83,Cd84,Cd86,Cdkn1a,Cebpb,Cfh,Cfp,Ciita,Clec4d,Ctss,Cxcr4,Cyld,Dapp1,Dbnl,Dck,Dcn,Def6,Dhrs4,Diaph1,Dicer1,Dkk3,Dock2,Dock8,Dok1,Ebf1,Ecm1,Efs,…
MP:0002175	decreased brain weight	0.0024	0.0282	52	4421	Common	Akt3,App,Aspm,Atr,Atxn1,B4galt2,Bckdk,Bcl2l1,Bdnf,Braf,Cav1,Copb2,Ctsf,Cyp27a1,Dyrk1a,Ghr,Gnpat,Hdac2,Hfe,Htra2,Kif1bp,Lama2,Mbd1,Mecp2,Nbn,Nde1,Npc1,Nrd1,Pdha1,Pfdn5,Phgdh,Pikfyve,Ppt1,Prmt5,Ptrh2,Rere,Rheb,Sirt1,Slc2a1,Spen,Spg11,Ssb,Sun1,Tardbp,Tcf4,Tkt,Ube3a,Uqcrfs1,Zdhhc13,Zdhhc17,Zfp521,Zfyve26
MP:0002100	abnormal tooth morphology	0.00242	0.0284	105	4421	Common	4930453N24Rik,Acvr1b,Acvr2a,Adamts2,Akap9,Alkbh1,Ank,Antxr1,Apc,Bbx,Bmpr1a,Braf,Ccl2,Cdkn1b,Cdon,Chuk,Cnnm4,Crebbp,Csf1,Csf1r,Ctnnb1,Ctsk,Ctsl,Dcn,Disp1,Ednra,Fam20a,Fam20c,Fgfr1,Fgfr2,Fig4,Fos,Fst,Fuz,Gfpt2,Gja1,Gli3,Hipk2,Ibsp,Ift88,Il1r1,Inhba,Itch,Itga11,Kat14,Lama5,Lima1,Lmna,Lpar1,Lrp4,Lrp6,Lrrk1,Ltbp1,Ltbp3,Map3k11,Mecp2,Miga2,Mitf,Mmp14,Morc2a,Mtf2,Ncoa3,Nectin1,Nf2,Nfatc1,Nfe2l2,Nos2,Not…
MP:0013151	abnormal incidence of induced tumors	0.0025	0.0293	122	4421	Common	Ahr,Aldh2,Apc,Arl6ip5,Atg4c,Bap1,Bin1,Brca2,Bub3,Camk2g,Cat,Cav1,Ccl2,Ccng1,Cd34,Cdkn1a,Cdkn1b,Cebpb,Chfr,Chordc1,Ciz1,Cop1,Cops6,Cul4a,Cul9,Cygb,Cyld,Cyp1b1,Dek,Dmtf1,Egr1,Eif2s2,Elavl1,Epha2,Ephx1,Errfi1,Etv6,Fgfr2,Flcn,Fos,Gadd45a,Gnai2,Hint1,Hipk1,Hmgn1,Ier3,Ifnar1,Ifnar2,Il1r1,Il6ra,Irf1,Itgb1,Kdm4c,Klf10,Klf4,Kmt2a,Loxl2,Lrig2,Lyst,Map3k6,Map3k8,Mapk8,Mif,Mmp11,Mmp19,Msh2,Mtdh,Mtf1,Mxi1,Myd…
MP:0011186	abnormal visceral endoderm morphology	0.00251	0.0294	38	4421	Common	Acvr1,Acvr1b,Adamts9,Apc,Bmpr1a,Bptf,Cnbp,Ctsl,Dab2,Dad1,Dhx9,Dld,Enpp2,Gata6,Htt,Ino80,Itgb1,Lamtor1,Mapk1,Med12,Mesd,Myh9,Nf2,Pik3c3,Pikfyve,Pknox1,Plpp3,Pofut2,Qk,Rab7,Rybp,Smad1,Smad2,Smad4,Trim33,Tsg101,Txnrd1,Zfr
MP:0008835	abnormal intercellular signaling peptide or protein level	0.00252	0.0295	207	4421	Common	Ace,Adam17,Adar,Ahr,Apc,Arid5a,Arrb2,Asah1,Ash1l,Atg16l1,B2m,B4galt1,Bcl6,Brd2,C3,C3ar1,C5ar1,Casp4,Cav1,Ccl2,Ccr1,Ccr5,Cd14,Cd163,Cd200,Cd36,Cd44,Cd47,Cebpb,Cebpd,Clec4d,Clic4,Crebbp,Csf1r,Ctsc,Cux1,Cxcl16,Ddx58,Ddx60,Dhx58,Dmd,Dnase2a,Dusp1,Egfr,Egr1,Elavl1,Enpp2,F2r,F3,Fas,Fos,Foxo1,Fyn,Galc,Gba,Ghr,Gnai2,Gpr183,Hcfc2,Hck,Hdac6,Hexb,Hif1a,Hmgb1,Hmox1,Hnrnpd,Hspb8,Htra2,Icam1,Ier3,Ifih1,Ifit2,I…
MP:0002620	abnormal monocyte morphology	0.00253	0.0296	118	4421	Common	4933434E20Rik,Acbd5,Actl6a,Agap1,Ap4e1,Arhgap15,Arhgap22,Arhgef1,Arid4a,Asah1,Bap1,Bnip2,Brpf1,Ccl2,Cdkn1a,Cflar,Ciz1,Clpp,Cog6,Col4a3bp,Coro1a,Csf1,Csf1r,Cul4a,Cx3cl1,Cx3cr1,Cxcr4,Dcbld2,Ddrgk1,Diaph1,Dido1,Elavl1,Epas1,Fam92a,Fbxl19,Fli1,Galnt18,Gmds,Gnai2,H2-Eb1,Hbs1l,Icam1,Id1,Ifnar1,Il4ra,Inpp5d,Irf5,Irf8,Itga4,Itgal,Itgb2,Itgb3,Jak2,Klf4,Kmt2a,Ldlrad4,Lgals3,Lmo2,Lyn,Medag,Metrnl,Mtor,Myo10…
MP:0001721	absent visceral yolk sac blood islands	0.00254	0.0296	12	4421	Common	Bmp4,Csk,F5,Fgfr1,Fn1,Ikbkap,Kdr,Ldb1,Lmo2,Plcg1,Tfpi,Yap1
MP:0005141	liver hyperplasia	0.00254	0.0296	12	4421	Common	Ahr,Apc,Fas,Igf2r,Jak1,Pex5,Plau,Ptpn11,Spi1,Trap1,Trp53,Xylt2
MP:0006049	semilunar valve regurgitation	0.00254	0.0296	12	4421	Common	Cplane1,Ctsl,Egfr,Gja1,Jag1,Klf3,Lox,Lrp1,Nfatc1,Pcnt,Plce1,Sema3c
MP:0000767	abnormal smooth muscle morphology	0.00255	0.0296	72	4421	Common	Acvrl1,Adam19,Ahr,Arid5b,Bach1,Bmp4,Bmpr1a,Cacnb3,Calcrl,Cald1,Cavin1,Ccm2,Col3a1,Crk,Cxcl12,Cxcr4,Cyp51,Des,Dll4,Eng,Enpp1,Fli1,Fn1,Fosl2,Hdac7,Inpp5d,Itga7,Jag1,Lmna,Lox,Lrp1,Ltbp1,Map3k7,Mapk7,Mgp,Mkl2,Mylk,Myocd,Notch2,Notch3,Npr2,Nr2f2,Nrp1,Ntf3,Parva,Pdgfb,Pdgfrb,Plekha1,Plod1,Plxnd1,Ppp1r12a,Prkcd,Prkg1,Pros1,Ptprj,Ramp2,Rapgef1,Rock1,S1pr1,Sgcb,Sgpl1,Shc1,Smad1,Smad5,Smarca4,Smo,Srf,Tgfbr…
MP:0001513	limb grasping	0.00261	0.0303	127	4421	Common	Adipor2,Akap12,Ankib1,Ap4e1,Araf,Arhgap32,Arl6ip1,Asah1,Aspa,Atg5,Atg7,Atp13a2,Atxn1,B4gat1,Bdnf,Bicd2,Bmp4,Brpf1,Cav1,Cln3,Cln8,Col12a1,Crebrf,Ctsf,Dag1,Dbnl,Depdc5,Dmtf1,Dnajc11,Dnajc5,Dst,Dysf,Ei24,Epb41l3,Fig4,Fkrp,Glb1,Glrb,Gnptab,Golga1,Herc1,Hexb,Hipk2,Hprt,Hspa4,Hspd1,Htra2,Htt,Ikbkap,Ino80,Inpp4a,Lama2,Lama4,Lamb1,Lamc1,Large1,Lpin1,Lrp1,Ltn1,Mbp,Mcoln1,Mecp2,Mtmr2,Ndrg1,Ndufs4,Nefl,Nfix…
MP:0009346	decreased trabecular bone thickness	0.00263	0.0304	33	4421	Common	Adam17,Akr1a1,Atp6v1h,Casp3,Cebpb,Chsy1,Cisd2,Cnot3,Creb3l1,Csf1,Ctgf,Fam20c,Fbn1,Fosl2,Ibsp,Id1,Ifngr1,Igf1r,Il6st,Inpp5d,Irs1,Mgp,Naca,Nfix,Notch2,P3h1,Ppib,Rassf2,Smad1,Spop,Stat3,Suco,Thrb
MP:0001683	absent mesoderm	0.00265	0.0306	41	4421	Common	Acvr1,Acvr1b,Adamts9,Arid1a,Armc5,Bmpr1a,Bmpr2,Bptf,Chd8,Chrd,Cops3,Ctnnb1,Dag1,Dhx9,Ecsit,Eif4g2,Ext1,Ext2,Gclc,Mesd,Metap2,Nf2,Nfe2l1,Nsd1,Pik3c3,Pknox1,Pofut2,Ppp1r8,Ppp2ca,Prickle1,Rac1,Slc31a1,Smad2,Smad4,Srf,Stat3,Tjp2,Trim28,Tsg101,Wls,Xrcc1
MP:0010053	decreased grip strength	0.00265	0.0306	136	4421	Common	Ackr3,Adarb1,Adipor2,Agl,Ank,Ap4e1,App,Aqp1,Arhgap23,Arid1b,Aspa,Atg5,Bace1,Bbs4,Bicd1,Bmpr1a,Cap2,Cav1,Cd55,Cd59a,Cd86,Cdkal1,Cept1,Col12a1,Col4a1,Col6a2,Cpe,Crebbp,Cryab,Csnk2b,Ctdsp1,Dag1,Des,Dlg4,Dmd,Dnaja1,Dnajc5,Dnmt3a,Dtna,Dync1h1,Efemp1,Eftud2,Eif2b5,Eif4g2,Eya3,Fbxw8,Fgd4,Fhl1,Flnc,Fmr1,Fxr1,Fyb,Fzd2,Gars,Gas7,Gbe1,Hectd3,Hmgn3,Hspb7,Htra2,Ireb2,Itch,Kdm1a,Klhl8,Large1,Lmna,Lrrk1,Lsm1,Lt…
MP:0005068	abnormal NK cell morphology	0.00268	0.031	87	4421	Common	Adm,Apc,Arhgef1,Atg7,Bap1,Bnip2,Calcrl,Ccdc127,Ccr5,Clpp,Cnot4,Cog6,Cx3cr1,Cxcr4,Ddx52,Dkk3,Dock2,E2f4,Edc4,Elf4,Emp2,Ets1,Fas,Fbn1,Fbxo7,Fli1,Foxo3,Galnt18,Gmds,Hbs1l,Id2,Ifnar1,Ifnar2,Ifngr1,Ikzf1,Il11ra1,Il18bp,Inpp5d,Irak1,Irf1,Itgb2,Itgb7,Kmt2e,Lcp2,Nat10,Nfil3,Nfkb1,Nipal3,Nlk,Npc2,Pepd,Pgrmc2,Pibf1,Pik3cg,Prkdc,Psmb10,Pten,Ptprc,Pycard,Rbmx,Rnf10,S1pr1,Sap130,Secisbp2,Setd5,Sgms1,Slc25a28,…
MP:0005356	positive geotaxis	0.0027	0.031	9	4421	Common	Canx,Dst,Foxp2,Jag1,Ndufs4,Pitrm1,Rnd3,Sod1,Zfp106
MP:0011636	disorganized mitochondrial cristae	0.0027	0.031	9	4421	Common	Clec16a,Clpp,Dnajc11,Hspd1,Rnaseh1,Sod1,Sqstm1,Tfam,Wdr81
MP:0012262	abnormal hindbrain size	0.0027	0.031	9	4421	Common	Dyrk1a,Hif1a,Hsd17b7,Itgb1,Kdm2b,Pak1ip1,Smg9,Tmem67,Zfp423
MP:0004484	altered response of heart to induced stress	0.00272	0.0312	56	4421	Common	Abcb10,Acp1,Akap13,Atp1b1,Atp2a2,Bnip3,Bnip3l,Camk2d,Camta2,Capns1,Ctnnb1,Dusp6,Edn1,Ednrb,Egln1,Emd,Esr1,Fhl1,Flt1,Fstl1,Glrx3,Inpp5f,Itgb1,Itgb3,Kdm4a,Klf15,Maoa,Map3k1,Map3k2,Map3k5,Mapk14,Mapk8,Mecp2,Mfn2,Mtor,Nek6,Nfatc3,Nox4,Pak1,Pla2g4a,Plce1,Ppp3cb,Prkca,Ptgs1,Ptgs2,Raf1,Rassf1,Rcan1,Rps6ka2,Ryr2,Sfrp2,Slc9a1,Tcap,Timp3,Tlr4,Txnip
MP:0005343	increased circulating aspartate transaminase level	0.00272	0.0312	56	4421	Common	Abhd5,Acaca,Adar,Agl,Ano10,Atg7,Atp8b1,Bcr,Bpnt1,Cisd2,Dnm1l,Epb41,Faf2,Fah,Fam104a,Fbxl5,Fth1,Gba,Gclc,Glmp,Hmgcr,Hnrnpd,Il6ra,Insr,Iqgap2,Jag1,Kbtbd2,Kpna1,Lrp6,Lrrk1,Map3k7,Mpv17,Myd88,Nfe2l1,Nr1h3,Pi4k2a,Pip4k2c,Pitpna,Polb,Pparg,Pten,Ptpn11,Rab27a,Rdx,Rpl13a,Sod2,Srsf3,Srxn1,Tnfaip3,Tulp3,Tysnd1,Uaca,Unc93b1,Usmg5,Zdhhc13,Zmpste24
MP:0004067	abnormal trabecula carnea morphology	0.00274	0.0313	44	4421	Common	Acvrl1,Adam17,Dll4,Dnaja3,Egln1,Ep300,Erbb2,Fgfr2,Gja1,Gys1,Hand2,Hspb7,Itgav,Jarid2,Jup,Lats2,Map3k3,Mapk7,Med1,Med24,Mef2c,Megf8,Ncoa6,Nr2f2,Pdlim3,Por,Rb1cc1,Rbp4,Rbpj,Shc1,Smad4,Smad7,Srf,Tead1,Tek,Tgfb2,Tgfbr3,Tmem100,Trim37,Ubp1,Wasf2,Wnk1,Xbp1,Zfp36l1
MP:0004945	abnormal bone resorption	0.00274	0.0313	44	4421	Common	Adam8,Atp6v0d2,Cd47,Cd68,Cebpb,Ciita,Cnot3,Csf1,Csf1r,Ctnnb1,Ctsk,Esr1,Farp2,Fcgr4,Fosl2,Gab2,Gnptab,Gpr65,Gsk3b,Hivep3,Ibsp,Ifngr1,Il1r1,Jak1,Lrrk1,Ncoa1,Notch2,Ostm1,Plekhm1,Ppard,Ptpn2,Scube3,Sfrp4,Spon1,Spp1,Src,Stat1,Syk,Thra,Tmem64,Tob2,Traf6,Tyrobp,Usp1
MP:0006395	abnormal epiphyseal plate morphology	0.00278	0.0318	103	4421	Common	2700049A03Rik,Acvr1,Adam17,Arid5b,Asah1,Atf2,Cav1,Cdc42,Chsy1,Col27a1,Creb3l2,Crtap,Csf1,Csf1r,Ctgf,Ctnna1,Ctnnb1,Ctsk,Ctsl,Ddr2,Dusp6,Dym,Ebf1,Ebf2,Esr1,Evc2,Ext1,Fam20c,Fermt2,Fgfr2,Fgfrl1,Flnb,Fos,Fosl2,Ghr,Glg1,Gnptab,Gsn,Gusb,Hif1a,Hspg2,Idh1,Ift80,Ift88,Igf1,Impad1,Irs1,Itga10,Itgb1,Kat6b,Kdm6b,Kif3a,Lasp1,Lbr,Lgals3,Ltbp3,Mapk14,Mbtps1,Mef2c,Mex3c,Mgp,Mitf,Mmp14,Ncdn,Nfatc1,Nfix,Nos3,Npr2,…
MP:0008561	decreased tumor necrosis factor secretion	0.00279	0.0318	66	4421	Common	Abhd16a,Azi2,Ccar2,Ccr1,Cd14,Cd1d1,Cd36,Clec4d,Clic4,Cnpy3,Coro1a,Cul5,Dhx58,Dlg1,Fads1,Fastk,Gpr65,H2-Ab1,Hcfc2,Hif1a,Hmox1,Ifit2,Ifnar1,Ifngr1,Ifngr2,Il1r1,Irak2,Irak4,Irf5,Itgax,Lgmn,Map3k8,Mapkapk2,March1,Mavs,Mtor,Myd88,Myo1g,Nfatc2,Nfe2l2,Nfkb1,Nod1,Pde4b,Peli1,Pla2g4a,Plcg2,Prkce,Pycard,Rhbdf2,Ripk2,Sash3,Sgms1,Sh3bp2,Siglec1,Slc15a4,Spp1,Stim1,Syk,Tlr1,Tlr2,Tlr3,Tlr4,Tollip,Traf6,Unc93b1,…
MP:0003857	abnormal hindlimb zeugopod morphology	0.00282	0.032	124	4421	Common	2700049A03Rik,Acsl4,Acvr1,Adgrf5,Agl,Akap11,Aktip,Ankib1,Ankrd27,Arid5b,Ascc3,Atad2b,Atp2b1,Atp6v0d1,Atxn7l3,Bmp4,Bnip2,Cd44,Chd2,Col4a3bp,Csf1,Ctgf,Ctsk,Cyp51,Ddr2,Dym,Ebf2,Egr1,Epdr1,Esr1,Evc2,Fam20a,Fam49b,Fbn1,Fbxl22,Fermt2,Fgfr1,Fgfr2,Flnb,Fstl1,Ghr,Gli3,Hand2,Hhipl1,Ift172,Il6st,Iqce,Irs1,Islr,Itga10,Itgb1,Klf10,Lgmn,Limk2,Lnpk,Lrrk1,Mapk14,Mapkapk2,Mbd5,Med25,Mef2c,Mex3c,Mxra7,Nabp2,Nfatc1…
MP:0010373	myeloid hyperplasia	0.00282	0.032	26	4421	Common	Adam10,Adam17,Bap1,Cbl,Etv6,Fbxo4,Hmga1,Id1,Ikzf1,Itgb2,Jak2,Kmt2a,Lyn,Nfkb1,Npm1,Nras,Ppm1d,Prkdc,Ptpn11,Runx1,Scmh1,Sh2b3,Slc29a3,Tet2,Tinf2,Tnfaip3
MP:0010956	abnormal mitochondrial ATP synthesis coupled electron transport	0.00282	0.032	26	4421	Common	Aifm1,Cisd1,Coq9,Dnajc15,Dnm1l,Hspd1,Lclat1,Lmna,Mterf3,Mtfr1,Ndufs4,Pex5,Pink1,Pnpt1,Ppard,Ptcd2,Sod2,Sqstm1,Tfam,Tgm2,Thra,Tk2,Tspo,Zfp106,mt-Co1,mt-Nd6
MP:0000066	osteoporosis	0.00288	0.0326	36	4421	Common	Adam17,Akr1a1,Arhgap1,Arl6ip5,Atp6v1h,Atr,Bgn,Ciita,Cnot3,Crtap,Csf1,Csf1r,Ctnnb1,Efemp1,Eif2ak3,Enpp1,Esr1,Gnptab,Id1,Ifngr1,Il6st,Itgb2,Lmna,Lrp6,Mmp14,Ncoa1,Nr3c1,Ppib,Rassf2,Slc26a2,Slc39a14,Thrb,Tnfrsf11b,Tob2,Trp53,Zdhhc13
MP:0002953	thick ventricular wall	0.00288	0.0326	36	4421	Common	Adam17,Adm,Akap6,Atp2a2,Bin1,Braf,Cav1,Des,Dmd,Epas1,Foxp1,Gyg,Hccs,Hdac2,Hif1a,Igf2r,Itgb1,Jag1,Leprotl1,Map2k1,Mtpn,Mybbp1a,Nos1ap,Nr3c1,Pdgfa,Pepd,Pfkfb2,Pik3ca,Ptpn11,Raf1,Ryr2,Sgcg,Slc2a4,Smtn,Trip11,Yipf5
MP:0008781	abnormal B cell apoptosis	0.00288	0.0326	36	4421	Common	Atmin,Bcl3,Birc3,Blnk,Casp2,Cd22,Cxcl12,Cxcr4,Ebf1,Elavl1,Ep300,Ets1,Fas,Fcgr2b,Fnip1,Grb2,Huwe1,Ikbkb,Ikzf1,Mcl1,Nfatc1,Nfkbia,Otud7b,Parp14,Peli1,Plcg2,Prkcd,Pten,Ptpn22,Sh3bp2,Smad7,Sppl2a,Stat6,Tlr2,Tnfaip3,Traf3
MP:0000245	abnormal erythropoiesis	0.00294	0.0331	77	4421	Common	Abcb10,Aco1,Ago2,Bap1,Bmi1,Brd1,Cd47,Cdk5rap2,Cflar,Chd2,Cpeb4,Dhx36,Dido1,Dnase2a,E2f4,Egr1,Eif2ak1,Epb41,Etv6,Exoc6,Fech,Fli1,Gata2,Hk1,Ikzf1,Il6st,Inpp5d,Irf8,Jak2,Jarid2,Jmjd6,Kat6a,Kdm1a,Kdm6a,Kitl,Lig1,Mapk14,Mcm3,Ncor1,Nfe2l1,Nfkbia,Nprl3,Pgm3,Picalm,Pik3r1,Pim1,Pknox1,Ppp1r15a,Ppp2ca,Prkab1,Ptpn11,Ptpn2,Ptprc,Rapgef2,Rb1,Rb1cc1,Rps7,Runx1,Safb,Samd9l,Senp1,Slc20a1,Slc25a37,Sos1,Sp3,Spi1,S…
MP:0000445	short snout	0.00294	0.0331	77	4421	Common	Acan,Adamts2,Adamts6,Alkbh1,Apaf1,Arid1a,Arid5b,Baz1b,Bmp4,Chd7,Chuk,Col27a1,Crebbp,Daam2,Ddr2,Ddx10,Dhx35,Dlg1,Dock1,E2f4,Ednra,Fam20c,Fbln5,Fbxo11,Fgfr1,Fgfr2,Fos,Gtf2i,Gusb,Hbs1l,Hspg2,Hyal2,Ift172,Impad1,Inppl1,Itgb1bp1,Kmt2a,Lmna,Lpar1,Lrig3,Ltbp1,Ltbp3,Megf8,Mia3,Mmp14,Mmp2,Nek1,Nisch,Npr2,Ostm1,Pdgfra,Pdgfrb,Pds5b,Plxnd1,Prdm16,Prickle1,Prkar1a,Prkra,Pth1r,Ptk7,Qsox1,Rpl38,Ryk,Serpinh1,Sh3…
MP:0008713	abnormal cytokine level	0.00296	0.0333	201	4421	Common	Ace,Adam17,Adar,Ahr,Apc,Arid5a,Arrb2,Asah1,Ash1l,Atg16l1,B2m,B4galt1,Bcl6,Brd2,C3,C3ar1,C5ar1,Casp4,Cav1,Ccl2,Ccr1,Ccr5,Cd14,Cd163,Cd200,Cd36,Cd44,Cd47,Cebpb,Cebpd,Clec4d,Clic4,Crebbp,Csf1r,Ctsc,Cux1,Cxcl16,Ddx58,Ddx60,Dhx58,Dnase2a,Dusp1,Egfr,Egr1,Elavl1,Enpp2,F2r,F3,Fas,Fos,Foxo1,Fyn,Galc,Gba,Ghr,Gnai2,Gpr183,Hcfc2,Hck,Hdac6,Hexb,Hif1a,Hmgb1,Hmox1,Hnrnpd,Hspb8,Htra2,Icam1,Ier3,Ifih1,Ifit2,Ifnar…
MP:0010544	interrupted aorta	0.00298	0.0335	31	4421	Common	Atmin,Bmp4,Bmpr2,Brd2,Chd7,Crkl,Dynll1,Ece1,Edn1,Ednra,Ermp1,Eya1,Flna,Gata6,Hand2,Hprt,Kat6a,Lama5,Ltbp1,Matr3,Mkl2,Ndst1,Nprl3,Sema3c,Smg9,Ssr2,Tab1,Tgfb2,Tgfbr2,Tmem67,Vegfa
MP:0004794	increased anti-nuclear antigen antibody level	0.003	0.0337	60	4421	Common	Bhlhe40,Blnk,C1qa,C4b,Cd1d1,Cd22,Cd276,Cd72,Cdkn1a,Def6,Ep300,Esr1,Fas,Fbn1,Fcgr2b,Foxo1,Gadd45a,Gpx7,Grk6,H2-Ab1,Ifih1,Il10ra,Il6st,Jak1,Lbr,Lyn,Mfge8,Mta2,Nfe2l2,Nfkbia,Pik3c2a,Plcg1,Plcl2,Polb,Pparg,Prkcd,Ptpn22,Ptpn6,Ptprc,Rc3h1,Rnf128,Scara5,Sirt1,Stk17b,Tank,Tbk1,Tgfb1,Thbs1,Tlr8,Tnfaip3,Tnfsf13b,Tnip1,Tpp2,Traf3,Traf3ip2,Trove2,Tyrobp,Unc93b1,Was,Zc3h12a
MP:0002658	abnormal liver regeneration	0.00309	0.0345	24	4421	Common	Acox1,C3,C3ar1,Cav1,Ccndbp1,Ccng1,Cebpb,Cenpe,Crem,Egfr,Egr1,Fah,Hcfc1,Hgf,Hif1a,Il6st,Jak1,Jun,Met,Nfe2l2,Nme1,Rps6,Slc39a14,Timp3
MP:0004111	abnormal coronary artery morphology	0.00309	0.0345	24	4421	Common	Adm,Ahr,Arid2,Braf,Dync2h1,Enpp1,Fas,Gja1,Hectd1,Hexim1,Hspg2,Kdr,Lrp1,Ltbp1,Megf8,Nrp1,Plxnd1,Rrm2b,Sgcd,Smarca4,Tdg,Tgfbr1,Tgfbr2,Vegfa
MP:0004892	increased adiponectin level	0.00309	0.0345	24	4421	Common	Adipoq,Adipor2,Brd2,Ccl2,Cdh13,Crebbp,Dok1,Fam213a,Ghr,Ikbke,Lmna,Lrp6,Mapk8,Mark3,Ncor2,Pde3b,Pparg,Ptpn1,Ptpn2,Sik3,Ssfa2,Tlr4,Tnks,Zeb1
MP:0003179	thrombocytopenia	0.00319	0.0356	93	4421	Common	Abca1,Acsl4,Acsl5,Actl6a,Aif1,Arid4a,Arrb1,Arrb2,Aspm,Bap1,Bcl2l1,Cd47,Cdc42,Cfh,Clpp,Crlf3,Cul4a,Dicer1,Dkc1,Egln1,Egr1,Entpd1,Erg,Etv6,Fli1,Foxo3,Fyb,Hyal2,Id1,Il6st,Inpp5d,Ireb2,Irf8,Itgal,Jak1,Kdm1a,Kdm6a,Kmt2a,Kmt2e,Kpna1,Lmo2,Lrrk1,Lyn,Meis1,Mllt3,Mta1,Mtus1,Myh9,Nae1,Nbeal2,Ncoa3,Nfe2l2,Osmr,Pcid2,Pdgfb,Pdgfrb,Pgm3,Phtf2,Pld3,Plek,Prkdc,Procr,Pros1,Rab27a,Rabggta,Rad50,Rc3h1,Rhoa,Rpl27a,Ru…
MP:0000219	increased neutrophil cell number	0.0032	0.0358	101	4421	Common	Adam10,Adam17,Akna,Ankrd27,Arhgap25,Asah1,B4galt1,Bap1,Bcor,Bcr,C4b,C9orf72,Ccl2,Cd59a,Cdh5,Cflar,Ciz1,Cmklr1,Coro1a,Ctnnb1,Cxcl12,Cxcr4,Diaph1,Dock2,Dyrk1b,Ehmt1,Fas,Galnt18,Gcnt1,Gmds,Gnai2,Gpr65,Gsn,Icam1,Id1,Ier3,Ifi204,Il6st,Inpp5d,Irak3,Irf8,Itgal,Itgam,Itgb2,Jak2,Kdm5a,Kmt2a,Kmt2e,Ldha,Lgals9,Lyn,Nckap1l,Nf1,Nras,Pik3c2a,Pik3cg,Pik3r5,Pomt1,Ppp2ca,Ppp2r1b,Prex1,Prkdc,Pten,Ptpn11,Ptpn6,Ptpr…
MP:0002824	abnormal chorioallantoic fusion	0.00323	0.0358	45	4421	Common	Abi1,Chm,Chmp5,Cyr61,Dad1,Ddx3x,Dph3,Enpp2,Fgfr2,Fn1,Furin,Grb2,Gtf2i,Gtf2ird1,Hus1,Itga4,Itgb1,Itgb8,Kat7,Kdr,Krit1,Ldb1,Mib1,Mpi,Nckap1,Paxip1,Plpp3,Pnpla6,Pten,Ptk2,Setd2,Smad1,Smad2,Smad5,Ss18,Supt20,Tgfb1,Tjp1,Tmed2,Tpt1,Ubr5,Usp9x,Vcam1,Vps26a,Zfp36l1
MP:0004564	enlarged myocardial fiber	0.00323	0.0358	45	4421	Common	Ackr3,Adam17,Aifm1,Akap6,Atg5,Braf,Cacna1c,Cryab,Csrp2,Des,Dnm1l,Dusp6,Egln1,Fstl1,Gas2l3,Gnaq,Ier3,Jup,Klf15,Lama4,Map2k1,Map2k3,Mapk14,Mdm4,Mtpn,Myh10,Nae1,Nek6,Nr3c1,Pak1,Pdha1,Pla2g4a,Pparg,Ppp3ca,Pten,Ptgs2,Ptpn11,Rab1a,Raf1,Sod2,Sos1,Tpm1,Uvrag,Vegfa,Wdr1
MP:0009414	skeletal muscle fiber necrosis	0.00323	0.0358	14	4421	Common	Cryab,Des,Dmd,Dysf,Fat1,Fkrp,Lama2,Large1,Maml1,Pfkm,Pik3r4,Plec,Sgcb,Vcp
MP:0010420	muscular ventricular septal defect	0.00323	0.0358	45	4421	Common	4933434E20Rik,Adamts6,Atp11a,Baz1b,Bmpr2,Brd2,Capza2,Cc2d2a,Cmip,Cog6,Col4a2,Col4a3bp,Cplane1,Crim1,Cxcr4,Dhx35,Dnm2,Fbln1,Fgfr2,Fgfrl1,H13,Hectd1,Mapk7,Matr3,Megf8,Morc2a,Nos3,Otud7b,Pdgfrb,Rala,Rpgrip1l,Setd5,Sh3pxd2a,Slit2,Smad6,Smarca4,Smg9,Ssr2,Tcf7l2,Tent5c,Tgfbr3,Traf6,Trappc10,Trip11,Xpnpep1
MP:0012099	decreased spongiotrophoblast size	0.00323	0.0358	14	4421	Common	Adam17,C3,Ddx3x,Egfr,Elavl1,Hsf1,Jup,Mapk14,Ncoa6,Ptp4a2,Raf1,Rbpj,Senp2,Sp3
MP:0003641	small lung	0.00324	0.0359	64	4421	Common	Acan,Adam17,Adgra2,Atmin,Atr,Bag6,Cdc73,Cplane1,Creb1,Crebbp,Ctgf,Cyld,Dchs1,Dlg1,Dynll1,Errfi1,Esr1,Eya1,Fat4,Fbln1,Fgfr2,Fubp1,Fuz,Fxr1,Gli3,Hectd3,Hyal1,Ift88,Kdm1a,Lama5,Lamc1,Lox,Lrp4,Mapk6,Mgp,Mmp14,Nfib,Nubp1,Pbrm1,Pbx1,Pcnt,Pcsk5,Pdgfra,Por,Prdm16,Prrx1,Pth1r,Raf1,Rdh10,Sec24b,Snx5,Sox9,Speg,Stk40,Syne1,Tgfb3,Tgfbr1,Tlr2,Trps1,Wdr35,Wnt5a,Zfp521,Zfpm2,Zmynd11
MP:0008043	abnormal NK cell number	0.00331	0.0365	82	4421	Common	Adm,Apc,Arhgef1,Atg7,Bap1,Bnip2,Calcrl,Ccdc127,Ccr5,Clpp,Cnot4,Cog6,Cx3cr1,Cxcr4,Ddx52,Dkk3,Dock2,E2f4,Edc4,Elf4,Emp2,Ets1,Fas,Fbxo7,Fli1,Foxo3,Galnt18,Gmds,Hbs1l,Id2,Ifnar1,Ifnar2,Ifngr1,Ikzf1,Il18bp,Inpp5d,Irak1,Irf1,Itgb7,Kmt2e,Lcp2,Nat10,Nfil3,Nfkb1,Nipal3,Nlk,Npc2,Pepd,Pgrmc2,Pibf1,Prkdc,Psmb10,Pten,Ptprc,Pycard,Rbmx,Rnf10,S1pr1,Sap130,Secisbp2,Setd5,Sgms1,Slc25a28,Slc38a10,Sms,Stat5a,Stat5b…
MP:0011368	increased kidney apoptosis	0.00331	0.0365	34	4421	Common	Alms1,Atp6ap2,Bag6,C1qa,Ccni,Cd59a,Crim1,Ctnnd1,Dcn,Dicer1,Fas,Fat4,Fgfrl1,Fryl,Glis2,Gstz1,Hmox1,Ift140,Itga1,Itgb1,Kif3a,Lama5,Lgr4,Lin7c,Lrrk2,Mafb,Nfat5,Nos3,Notch2,Osr1,Pkd2,Polb,Pparg,Rrm2b
MP:0000067	osteopetrosis	0.00333	0.0367	22	4421	Common	Atp6v0d2,Csf1,Csf1r,Ctnnb1,Ctsk,Fos,Gab2,Gsn,Itgb3,Jdp2,Lrrk1,Mitf,Nfatc1,Nfkb2,Ostm1,Snx10,Spi1,Src,Tnfrsf11a,Traf6,Trp53,Tyrobp
MP:0000188	abnormal circulating glucose level	0.00337	0.037	382	4421	Common	Abcc9,Abhd5,Acaca,Acacb,Acadl,Acadm,Acads,Acadvl,Acsl5,Acss1,Adar,Adcy3,Adgrf5,Adipoq,Adipor2,Agl,Agpat1,Akap9,Alg2,Alms1,Ank2,Ankib1,Ap4e1,Appl1,Arrdc3,Aspa,Ate1,Atf3,Atp5g2,Atp5l,Atr,Bach1,Bad,Bag3,Baz1b,Bbs4,Bdnf,Bhlhe40,Blvra,Bmp4,Braf,Brd2,Brpf3,Bscl2,Btg2,Bzw2,C1qa,C1qtnf7,C3,Cacna1c,Camk1,Casp4,Cast,Cav1,Ccdc3,Ccdc80,Ccl2,Cd36,Cdc34,Cdk4,Cdkal1,Cdkn1a,Cdo1,Cebpb,Cenpe,Cept1,Ces1d,Chn1,Cide…
MP:0005561	increased mean corpuscular hemoglobin	0.00337	0.037	61	4421	Common	Aco1,Acsf2,Agpat1,Apbb2,Arhgap25,Arpc2,Arrb1,Atg16l1,Bhlhe40,Btg2,Cdk5rap2,Cfh,Chn1,Chsy1,Clpp,Copg1,Dcaf10,Dkk3,Dlg5,Eif2b2,Elmo1,Epb41,Ezh2,Fam53b,Fbxo7,Foxo3,Hbs1l,Irf8,Itgb3,Kitl,Klf9,Laptm5,Lmnb1,Lpar6,Lrpprc,Lsm11,Ltbp1,Mgat4b,Mtor,Myo1c,Nptn,Pex3,Pik3cb,Pnpt1,Prkg1,Ptges2,Ptpn2,Rfc1,Sar1b,Slc25a28,Slc29a1,Smarcal1,Spast,Tbc1d4,Tspan18,Usp11,Usp33,Vangl1,Vps33b,Zfp451,Zzef1
MP:0009590	increased gonad tumor incidence	0.00337	0.037	29	4421	Common	Apc,Atad5,Atm,Bap1,Bin1,Ccdc80,Cdk5rap2,Cdkn1a,Cdkn1b,Cdkn2c,Cop1,Ctnnb1,Cul9,Dclre1a,Foxo3,Htatip2,Kitl,Mcm9,Nbn,Ndrg2,Pcsk6,Pten,Rint1,Sav1,Smad4,Sptbn1,Tom1l2,Trim37,Trp53
MP:0012114	absent inner cell mass proliferation	0.00337	0.037	29	4421	Common	Ahctf1,Cdc73,Chordc1,Cops2,Cops5,Dab2,Ezh2,Grb2,Hspa5,Kat8,Max,Mcm4,Med28,Mtor,Nbn,Ncapg2,Prmt5,Prpf19,Psmd4,Sbds,Smarca5,Smarcb1,Taf10,Tardbp,Terf1,Thap11,Tsg101,Txn1,Zfp24
MP:0004259	small placenta	0.00353	0.0387	37	4421	Common	Adm,Ago2,Alkbh1,Arid1a,Birc6,Braf,C3,Ccdc134,Chm,Cul4b,Ddx3x,Dph3,Egfr,Ehmt2,Elavl1,Ern1,Fbxw8,Fos,G6pdx,Gab1,Grb10,Hgf,Ikbkap,Jup,Map2k1,Met,Npm1,Nsdhl,Plk2,Ptp4a2,Raf1,Rapgef2,Rictor,Senp2,Snx13,Ssr3,Syde1
MP:0008214	increased immature B cell number	0.00353	0.0387	37	4421	Common	Adam10,Akap13,Arhgap17,Bax,Btk,Cd36,Cd72,Cd74,Def6,Dll4,Ell2,Eps15,Fas,Fli1,Hsd17b11,Irf8,Klhl6,Lama5,Lyn,Nfkb2,Nfkbia,Notch2,Pepd,Plcg2,Ppp2r3c,Prkcd,Ptpn22,Ptprc,Tnfaip3,Tnfrsf11b,Tnfsf13b,Traf3,Traf3ip2,Vamp3,Vav1,Vcam1,Zfp365
MP:0002021	increased incidence of induced tumors	0.0036	0.0393	83	4421	Common	Ahr,Aldh2,Apc,Atg4c,Bap1,Bin1,Bub3,Cat,Cav1,Cdkn1a,Cdkn1b,Chfr,Chordc1,Ciz1,Cop1,Cul9,Cygb,Cyld,Dmtf1,Egr1,Elavl1,Epha2,Errfi1,Etv6,Fgfr2,Flcn,Fos,Gadd45a,Gnai2,Hint1,Hmgn1,Ifnar1,Ifnar2,Irf1,Klf10,Klf4,Kmt2a,Lyst,Map3k6,Map3k8,Mapk8,Mif,Msh2,Mtf1,Mxi1,Nbn,Ncoa3,Ndrg1,Nfe2l2,Nit1,Per2,Pim1,Plcl1,Pms2,Polh,Ppard,Pparg,Ppp2r1a,Ppp6c,Prkch,Pten,Ptgs2,Ptpn11,Rae1,Ralgapa2,Ranbp2,Rassf1,Samd9l,Skil,St…
MP:0005517	decreased liver regeneration	0.00362	0.0395	18	4421	Common	C3,C3ar1,Cav1,Ccndbp1,Cebpb,Crem,Egfr,Egr1,Fah,Hcfc1,Hgf,Hif1a,Met,Nfe2l2,Nme1,Rps6,Slc39a14,Timp3
MP:0003312	abnormal locomotor coordination	0.00367	0.04	310	4421	Common	Aars,Abhd12,Acan,Acp2,Adgrg6,Aff1,Aga,Agl,Agtpbp1,Aifm1,Ank,Ank3,Ap1g1,Apba1,App,Araf,Arcn1,Arhgap10,Arl6ip1,Arsa,Aspa,Atf2,Atg4b,Atg5,Atg7,Atm,Atp13a2,Atp7a,Atrn,Atxn1,Atxn7,Babam2,Bace1,Bckdk,Bdnf,Bicd2,Bloc1s5,Bloc1s6,Bmi1,Bmp4,Btd,Canx,Casp3,Cast,Cav1,Ccm2,Cdk4,Cdkn2c,Cerk,Cfl1,Chd7,Chn1,Chp1,Ciz1,Clcc1,Clcn3,Cln3,Cln8,Cnp,Cntn1,Col1a2,Coq9,Cp,Cpe,Csf1r,Cstb,Ctsa,Ctsd,Ctsf,Dapk1,Dbnl,Dctn1,Dd…
MP:0008209	decreased pre-B cell number	0.00375	0.0409	49	4421	Common	Aff1,Atm,Atmin,Blnk,Ccnd3,Crebbp,Cxcl12,Dck,Dicer1,Dkc1,Dynll1,Dyrk1a,Ebf1,Etv6,Ezh2,Fnip1,Hax1,Hspa9,Htra2,Huwe1,Igbp1,Ikzf1,Inpp5d,Kat6a,Kmt2a,Kmt2e,Mcl1,Msi2,Nbn,Noc2l,Notch2,Pbx1,Pfdn1,Pik3ap1,Pik3r1,Pknox1,Plcg2,Ppp2r3c,Prkdc,Rad50,Rbm15,Sgpl1,Spi1,Srsf3,Syk,Tcf12,Tet2,Twsg1,Xrcc6
MP:0002828	abnormal renal glomerular capsule morphology	0.00378	0.0409	62	4421	Common	Ace,Adipoq,Ampd2,Arhgap35,Atp6ap2,Bicc1,Ccni,Cd2ap,Cd55,Cfl1,Col4a1,Crim1,Ctnnd1,Dcn,Ddr1,Dicer1,Fam20c,Fas,Fat1,Fbln1,Glis2,Gne,Golm1,Invs,Itga1,Itga3,Itgb1,Lama5,Lamb2,Lamc1,Ldb1,Lgr4,Mafb,Magi2,Mpv17,Mtor,Mxi1,Myh9,Myo1e,Naglu,Nos3,Notch2,Nphp3,Pdgfrb,Pex13,Pik3c2a,Pkd2,Podxl,Pparg,Ppt1,Prkci,Ptgis,Ptgs2,Ptpro,Rac1,Rbpj,Rrm2b,Tjp1,Tns1,Vegfa,Wwtr1,Yap1
MP:0004984	increased osteoclast cell number	0.00378	0.0409	46	4421	Common	Adam8,Akr1a1,Ccl2,Ciita,Cnot3,Ctnnb1,Ctsk,Dkk2,Ebf1,Egr1,Esr1,Farp2,Fblim1,Fosl2,Gnptab,Hspg2,Ibsp,Id1,Il6st,Inpp5d,Irak3,Irs1,Itgb3,Lifr,Lrrk1,Mitf,Ncor2,Nf1,Notch2,P2rx7,Postn,Ppard,Rnf146,Sfrp4,Sgpl1,Sh3bp2,Slc39a14,Spp1,Sqstm1,Stat1,Thrb,Tnfrsf11b,Tob2,Vcp,Wdr1,Wrn
MP:0008597	decreased circulating interleukin-6 level	0.00378	0.0409	32	4421	Common	Arid5a,B4galt1,C3,C3ar1,C5ar1,Cd14,Clic4,Ctsc,Enpp2,F3,Gba,Hspb8,Ifit2,Il1r1,Il1rn,Irak2,Irak4,Irf5,Mavs,Myd88,Peli1,Prkab1,Serpine1,Sgms1,Siglec1,Spp1,Tlr4,Tnfrsf1a,Tollip,Tradd,Traf6,Unc93b1
MP:0010435	abnormal heart atrium and ventricle connection	0.00378	0.0409	46	4421	Common	Acvr1,Adam17,Adam19,Anks6,Arid2,Bmp4,Bmpr1a,Braf,Cc2d2a,Cntrl,Crebbp,Cxcr4,Cyr61,Dchs1,Dock1,Efna1,Efnb2,Ehmt1,Fbn1,Fgfrl1,Flna,Gja5,Hand2,Hprt,Ift140,Igf2r,Megf8,Morc2a,Nf1,Nfatc1,Nr1d2,Ntf3,Pdlim7,Ptpn11,Sap130,Setd5,Sh3pxd2a,Sh3pxd2b,Shoc2,Sirt1,Smad6,Sox9,Tgfb2,Tns1,Xpnpep1,Zfpm2
MP:0010487	abnormal right subclavian artery morphology	0.00378	0.0409	32	4421	Common	4933434E20Rik,Acvr1,Brd2,Chrd,Cmip,Col4a2,Crkl,Ece1,Edn1,Ednra,Eya1,Fbln1,Gata6,H13,Hand2,Hprt,Jag1,Kat6a,Lama5,Morc2a,Myo9a,Nsun2,Pdgfra,Plxnd1,Prmt7,Rala,Rere,Sec24b,Tcf7l2,Tgfb2,Tgfbr2,Vegfa
MP:0011513	abnormal vertebral artery morphology	0.00378	0.0409	32	4421	Common	4933434E20Rik,Adcy9,Atp11a,Brd2,Capza2,Cir1,Cmip,Cog6,Col4a2,Col4a3bp,Coro1c,Crim1,Dhx35,Dmxl2,H13,Kif1bp,Morc2a,Npat,Nsun2,Polb,Prmt7,Pth1r,Rala,Rpgrip1l,Setd5,Sh3pxd2a,Smpd4,Tcf7l2,Tent5c,Traf6,Xpnpep1,Zmynd11
MP:0001828	abnormal T cell activation	0.00379	0.0409	182	4421	Common	Ahnak,Appl1,Arhgef1,Arhgef12,Arhgef6,Atg3,Atg5,Bcl10,Bcl2l1,Bclaf1,Becn1,Bhlhe40,Birc2,Birc3,Cadm1,Casp8,Cbl,Cblb,Ccnd3,Ccr5,Cd1d1,Cd274,Cd276,Cd2ap,Cd44,Cd48,Cd59a,Cd74,Cd81,Cd83,Cd86,Cdk6,Cdkn1a,Cdkn1b,Chd4,Chst3,Ciita,Clec4d,Clpp,Cops8,Coro1a,Dbnl,Dck,Diaph1,Dicer1,Dock8,Dok1,Drosha,Elavl1,Elf4,Erap1,Ets1,Fas,Fbxw7,Foxo1,Foxo3,Foxp1,Fyb,Fyn,Gadd45a,Gnai2,H2-Ab1,H2-D1,H2-DMa,Hcls1,Hnrnpl,Hr,Ifi…
MP:0004272	abnormal basement membrane morphology	0.00379	0.0409	27	4421	Common	Adm,Ahi1,B4gat1,Cav2,Col4a1,Crim1,Dag1,Hspg2,Itga6,Itgb1,Itgb8,Kdr,Lama2,Lama4,Lama5,Lamc1,Mmp14,Myo7a,Nid1,P4ha1,Pdgfrb,Pomgnt1,Pomgnt2,Pomt2,Reck,Ric8a,Slc31a1
MP:0010563	increased heart right ventricle size	0.00401	0.0432	66	4421	Common	Abca1,Ackr3,Acvr1,Adam19,Adamts6,Ap2b1,Atp2a2,Baz1b,Bmp4,Bmpr2,Cacna1c,Cav1,Cavin1,Cdh2,Chrd,Crk,Des,Dnaja3,Edn1,Erg,Fbln5,Fbn1,Fgfr1,Gab1,Gja1,Gucy1a1,Hand2,Hccs,Hmox1,Igf2r,Itgb1,Jag1,Jup,Klf3,Lmna,Lox,Mef2a,Nae1,Ndst1,Ndufs6,Nos3,Npr1,Ntf3,Pdgfa,Pdgfb,Pdgfrb,Pdlim3,Phc1,Pikfyve,Plce1,Plrg1,Pparg,Ppp3ca,Rce1,Robo1,S100a1,Sirt1,Slco2a1,Slit3,Sod2,Sos1,Ssr1,Tfam,Tgfb2,Trappc10,Zmpste24
MP:0002743	glomerulonephritis	0.00408	0.0438	56	4421	Common	Abca1,Ash1l,C1qa,C3,C4b,Ccr1,Cd1d1,Cd72,Cdkn1a,Cebpb,Cfh,Coro1a,Ep300,Esr1,Fas,Fcgr2b,Gadd45a,Glis2,Gpx7,Grk6,Hmox1,Hr,Ifih1,Lamb2,Lyn,Man2a1,Mark2,Met,Mgat2,Mta2,Mtus1,Nfe2l2,Pgm3,Pik3c2a,Plcg2,Polb,Pparg,Ppp2ca,Prkcd,Ptpn22,Ptprc,Rc3h1,Rpl22,Serpine1,Sirt1,Tank,Tlr8,Tnfsf13b,Tnip1,Tns2,Top3b,Traf3ip2,Trove2,Unc93b1,Was,Wipf1
MP:0003400	kinked neural tube	0.00408	0.0438	35	4421	Common	Aph1a,Axin1,Casp8,Cyfip1,Enpp2,Ep300,Erbb2,Fgfr1,Fn1,Furin,Hus1,Ift46,Ift88,Itga5,Itgb1,Jag1,Kdm2b,Kdm6a,Kmt2b,Ldb1,Med12,Mib1,Mthfd1,Ncstn,Nup133,Nup50,Plpp3,Pten,Ptk7,Ptpn11,Ptpn12,Ss18,Ssbp3,Tfrc,Tgfbr1
MP:0004592	small mandible	0.00419	0.045	70	4421	Common	Acvr1,Acvr2a,Baz1b,Bmp4,Braf,Brd4,Cask,Chrd,Chuk,Cnbp,Cplane1,Crkl,Ctgf,Dlg1,Ece1,Edn1,Ednra,Egfr,Eya1,Fgfr1,Fgfr2,Fgfrl1,Foxn3,Fuz,Gja1,Hand2,Hoxa3,Hspg2,Itgb1,Kat6b,Kif3a,Limk2,Lmna,Loxl3,Ltbp1,Map3k7,Mapk1,Mau2,Mbtps1,Mmp14,Mmp2,Mnt,Nabp2,Nipbl,Pds5b,Prdm16,Prickle1,Prrx1,Pth1r,Rpgrip1l,Ryk,Sc5d,Sh3pxd2b,Slc39a13,Smad2,Sox9,Spry2,Srf,Tcof1,Tgfb2,Tgfbr2,Tmem67,Trp53,Trps1,Vegfa,Wdr11,Wdr19,Wnt5…
MP:0003884	decreased macrophage cell number	0.0042	0.045	63	4421	Common	Actl6a,Ankrd11,Apc,Arhgap15,Bcl3,Birc3,Bmpr1a,C3,C3ar1,C5ar1,Ccl2,Cd47,Cebpb,Cflar,Csf1,Csf1r,Ctnnb1,Ctsl,Farp2,Fcgr4,Fgfr2,Fmnl1,Fos,Gab2,Gmds,Hivep3,Ibsp,Ifngr1,Igf1r,Irf8,Itgam,Itgb3,Kmt2e,Lgals3,Lyst,Mitf,Mmp2,Msi2,Nfatc1,Nfatc3,Nfkb1,Nos2,Nr3c1,Pik3cg,Plcg2,Pparg,Prkdc,Ptn,Rad50,Rarres2,Rassf2,Rgs10,Riox2,Smad4,Sparc,Spi1,Spp1,Sqstm1,Suco,Thra,Tmem64,Tnfrsf11a,Trib1
MP:0005405	axon degeneration	0.0042	0.045	53	4421	Common	Abcd1,Als2,App,Aspa,Atg7,Chp1,Cisd2,Cln6,Cln8,Cnp,Csf1r,Ctsd,Dst,Ei24,Galc,Gars,Gnptab,Hsd17b4,Itga6,Itgav,Klc1,Lmnb1,Lpin1,Mtmr2,Ndufs4,Nefm,Nf1,Nmnat2,Npc1,Pik3c3,Pmp22,Prnp,Psap,Rab18,Sacs,Slc12a6,Slc33a1,Slc9a1,Smarcb1,Sod2,Spg11,Spg7,Stmn1,Stxbp1,Tbce,Tfam,Tmem184b,Ube4b,Usp14,Vapb,Vegfa,Zfp106,Zfyve26
MP:0005262	coloboma	0.00423	0.0453	25	4421	Common	Arhgap35,Atmin,Chd7,Col4a2,Dynll1,Ext1,Gas1,Hs2st1,Ift88,Jag1,Kdm2b,Lrp6,Ltbp3,Mitf,Myo10,Ndst1,Phactr4,Pign,Rala,Rpl24,Rps7,Rybp,Smg9,Smoc1,Trp53
MP:0002586	abnormal platelet volume	0.00426	0.0455	38	4421	Common	Acaa1a,Add1,Ahcyl1,Arhgef3,Atp5g2,Atp6v1d,Baz1a,Chd2,Cyp27a1,Dbn1,Ehmt1,Entpd1,Fbxo7,Gpr107,Gpsm2,Hbs1l,Ireb2,Jak1,Jak2,Lpin2,Nbeal2,Nhp2,Npm1,Pdlim1,Pik3c2a,Pld1,Prkab1,Rabggta,Rest,Rhoa,Runx1,Sgms1,Slc38a10,St3gal4,Tmem189,Vps33b,Wdr1,Wdr37
MP:0009289	decreased epididymal fat pad weight	0.00426	0.0455	38	4421	Common	Acot13,Ap1s2,Atf3,Cebpb,Crbn,Cspg4,Dok1,Dusp1,Fmo5,Ghr,Gpd2,Hif1an,Kbtbd2,Kmt2b,Lipa,Lpin1,Lrp1,Mlxipl,Myd88,Ncoa3,Npr3,Npy1r,Nr2c2,Phf2,Pla2g16,Plin2,Pparg,Prkab1,Pten,Ptpn1,Rapgef3,Rcan2,Rps6kb1,Sirt1,Ssfa2,Tlr4,Tnks,Vldlr
MP:0004953	decreased spleen weight	0.0043	0.0458	50	4421	Common	Adh5,Aif1,Akap13,Atl2,Atmin,Atr,Bag3,Bmi1,Braf,Coro1a,Csf1,Cul4a,Cxcr4,Efemp1,Ercc5,Ets1,Ghr,Grb14,Gstz1,Kat6a,Klhl6,Lyn,Msi2,Mxra7,Nfkb2,Nras,Nxn,Pard3,Pawr,Pcid2,Phc1,Psap,Ptp4a2,Pura,Rassf2,Rhobtb3,Rnf10,Rras2,Selenbp1,Slc31a1,Sptlc2,Ssb,Tbc1d4,Tgfb1,Thoc5,Thra,Tnfsf13b,Trp53,Usp28,Zfp521
MP:0002651	abnormal sciatic nerve morphology	0.00432	0.0459	30	4421	Common	Adgrg6,Cox6a1,Dst,Ebf2,Erbb2,Fig4,Gabbr1,Galc,Gars,Itga6,Itgb1,Lama4,Lamc1,Large1,Lmna,Lpar1,Lpin1,Mtmr2,Nefl,Nrd1,Prnp,Pten,Rab18,Rnd3,Rrm2b,Serpine2,Slc12a6,Sncg,Vegfa,Vps54
MP:0003567	abnormal fetal cardiomyocyte proliferation	0.00432	0.0459	30	4421	Common	Adam17,Arid2,Bmpr1a,Calcrl,Cdkn1b,Cenpf,Chd7,Fgfr1,Foxp1,Gas2l3,Gbe1,Gys1,Hand2,Hccs,Hdac2,Hspb7,Jarid2,Kmt2d,Mapk14,Naca,Nae1,Ncoa6,Nfat5,Rbp4,Rbpj,Sos1,Sptbn1,Tbx18,Tgfbr3,Ywhae
MP:0010025	decreased total body fat amount	0.00433	0.0459	196	4421	Common	Acacb,Acsf2,Adamts1,Adcy3,Adgrf5,Adpgk,Aebp1,Afap1l2,Ahcyl1,Ahnak,Akap9,Angptl2,Angptl4,Ap1s2,Ap4e1,Aplp2,Arpc2,Arrb1,Arrb2,Aspa,Atp6v0a1,Atp8b2,Atrn,Baz1a,Bckdk,Bhlhe40,Bscl2,Bzw2,C3,Camkk2,Cav1,Cbl,Ccny,Cd14,Cd84,Chd2,Chd7,Chn1,Cisd2,Cln6,Col1a2,Commd9,Cp,Crtc3,Ctdspl2,Ctsk,Cux1,Cyb5r4,Cybc1,Cyp20a1,Dbn1,Dlg3,Dnajc7,Dusp1,Dync1i2,Efemp1,Ehmt1,Eif4ebp1,Eif4h,Eif6,Epdr1,Esco1,Fech,Foxj3,Foxo3,Fto…
MP:0009269	decreased fat cell size	0.00437	0.0463	47	4421	Common	Adcy3,Adipor2,Arrdc3,Ate1,Bscl2,Ccdc3,Ccl2,Ccny,Cidea,Cnot3,Crebbp,Crtc3,Dok1,Dusp1,Ehmt1,Eprs,Fmo5,Fto,Hif1an,Hmox1,Lnpep,Lrp1,Myd88,Ncoa3,Ncor1,Ncor2,Nos3,Npr3,Nr2c2,Phf2,Pla2g16,Plin2,Pparg,Pten,Rapgef3,Rbl1,Rptor,Samd4,Senp1,Sik3,Spg20,Ssfa2,Tgfb1,Tlr2,Tlr4,Trib1,Wwtr1
MP:0005326	abnormal podocyte morphology	0.0044	0.0465	44	4421	Common	Adipoq,Ampd2,Atp6ap2,Ccni,Cd2ap,Cd55,Cfl1,Col4a1,Crim1,Ctnnd1,Ddr1,Fas,Fat1,Fbln1,Gne,Itga1,Itga3,Itgb1,Lama5,Lamb2,Ldb1,Mafb,Magi2,Mpv17,Mtor,Myh9,Myo1e,Naglu,Notch2,Pdgfrb,Pex13,Pik3c2a,Podxl,Pparg,Ppt1,Prkci,Ptgs2,Ptpro,Rac1,Rbpj,Rrm2b,Tjp1,Vegfa,Yap1
MP:0011497	abnormal glomerular capsule visceral layer morphology	0.0044	0.0465	44	4421	Common	Adipoq,Ampd2,Atp6ap2,Ccni,Cd2ap,Cd55,Cfl1,Col4a1,Crim1,Ctnnd1,Ddr1,Fas,Fat1,Fbln1,Gne,Itga1,Itga3,Itgb1,Lama5,Lamb2,Ldb1,Mafb,Magi2,Mpv17,Mtor,Myh9,Myo1e,Naglu,Notch2,Pdgfrb,Pex13,Pik3c2a,Podxl,Pparg,Ppt1,Prkci,Ptgs2,Ptpro,Rac1,Rbpj,Rrm2b,Tjp1,Vegfa,Yap1
MP:0002705	dilated renal tubules	0.00442	0.0467	67	4421	Common	Ahi1,Alms1,Arhgap35,Arl3,Atp6ap2,Bag6,Col4a1,Cplane1,Crim1,Ctnnb1,Ctnnd1,Dchs1,Dcn,Dicer1,Ercc1,Exoc5,Fah,Fam20a,Fan1,Fgfr2,Flcn,Gadd45a,Glis2,Gne,Hspa5,Ift88,Invs,Itga3,Itgb1,Kirrel,Lama5,Ldb1,Lgr4,Limk2,Lin7c,Lrrk2,Ltbp1,Lzts2,Mef2c,Mpv17,Mtss1,Nfat5,Nfia,Nos3,Notch2,Nphp3,Pkd2,Pmm2,Ppp3r1,Prickle1,Prkci,Ptgs2,Rrm2b,Sdc4,Sdccag8,Sod2,Spp1,Tgfb2,Tjp1,Tlr4,Tns1,Tns2,Ttc21b,Ttc8,Vegfa,Wwtr1,Xylt2
MP:0012441	abnormal monocyte cell number	0.00455	0.0479	115	4421	Common	4933434E20Rik,Acbd5,Actl6a,Agap1,Ap4e1,Arhgap15,Arhgap22,Arhgef1,Arid4a,Asah1,Bap1,Bnip2,Brpf1,Cdkn1a,Cflar,Ciz1,Clpp,Cog6,Col4a3bp,Coro1a,Csf1,Csf1r,Cul4a,Cx3cl1,Cx3cr1,Cxcr4,Dcbld2,Ddrgk1,Diaph1,Dido1,Elavl1,Epas1,Fam92a,Fbxl19,Fli1,Galnt18,Gmds,Gnai2,H2-Eb1,Hbs1l,Icam1,Id1,Ifnar1,Il4ra,Inpp5d,Irf5,Irf8,Itga4,Itgal,Itgb2,Itgb3,Jak2,Klf4,Kmt2a,Ldlrad4,Lgals3,Lmo2,Lyn,Medag,Metrnl,Mtor,Myo10,Ncst…
MP:0005422	osteosclerosis	0.00456	0.0479	11	4421	Common	Bmpr1a,Csf1,Fam20c,Gusb,Hivep3,Itgb3,Lrrk1,Ltbp3,Mitf,Ncor2,Thra
MP:0006278	aortic aneurysm	0.00456	0.0479	11	4421	Common	Atp7a,Fbn1,Klf15,Lox,Micu2,Mkl2,Tgfb2,Tgfbr1,Tgfbr2,Timp1,Timp3
MP:0010574	aorta dilation	0.00456	0.0479	11	4421	Common	Atp7a,Gla,Klf15,Krit1,Lsm1,Mkl2,Pdgfb,Pdgfrb,Rest,Spg20,Tmbim1
MP:0010601	thick pulmonary valve	0.00456	0.0479	11	4421	Common	Ackr3,Adam17,Adam19,Braf,Efnb2,Gja1,Ntf3,Plce1,Smarca4,Tgfb2,Zfpm2
MP:0002413	abnormal megakaryocyte progenitor cell morphology	0.00458	0.048	57	4421	Common	Actl6a,Ano6,Bcl2l1,Cdk6,Chd2,Crebbp,Csnk1a1,Dicer1,Dido1,Egln1,Ep300,Ep400,Etv6,Fli1,Fubp1,Gata2,Icam2,Il6st,Irf8,Jak1,Jak2,Jarid2,Kdm6a,Lmo2,Med1,Meis1,Myh9,Nbeal2,Ncor2,Npm1,Osmr,Pgm3,Pik3c2a,Pros1,Rabggta,Ranbp10,Rb1,Rbm15,Rcan1,Rps14,Runx1,Samd9l,Sbds,Senp1,Sh2b3,Sirpa,Smap1,Sos1,Spred2,Stim1,Tln1,Trp53,Ttc7,Vps33b,Was,Wdr1,Zfp385a
MP:0003419	delayed endochondral bone ossification	0.0047	0.0491	33	4421	Common	Csf1r,Ctgf,Dicer1,Elavl1,Fam20c,Fermt2,Flnb,Fosl2,Ghr,Gja1,Igf1,Kdm6b,Lasp1,Mmp14,Nfix,Nipbl,Nov,Npr3,Pds5a,Pkdcc,Prickle1,Serpinh1,Sfrp2,Slc26a2,Sox9,Sp3,Src,Suco,Thra,Tmem119,Trps1,Twsg1,Zeb1
MP:0008190	decreased transitional stage B cell number	0.0047	0.0491	33	4421	Common	Adam10,Akap13,Bcl3,Blnk,Btk,Cd22,Ebf1,Ell2,Erg,Fas,Fnip1,Grb2,Hax1,Huwe1,Kdelr1,Lama5,Lyn,Map3k14,Mtor,Nfkb2,Nfkbia,Notch2,Npy1r,Plcg2,Ppp2r3c,Sh3bp2,Sh3kbp1,Sppl2a,St6gal1,Tnfsf13b,Vcam1,Zbtb1,Zfp318
MP:0011095	embryonic lethality between implantation and placentation, complete penetrance	0.0047	0.0491	33	4421	Common	Alas1,Arhgap29,Atxn10,Bap1,Dab2,Ddx24,Gpi1,Hdhd2,Hsp90b1,Ino80,Matr3,Mettl3,Pcbp1,Pik3c3,Pmpcb,Ppp1r10,Qk,Rack1,Sec24c,Setdb1,Skiv2l,Slc2a3,Smg1,Spint2,Tada3,Tbc1d14,Uba3,Ugcg,Usp16,Usp5,Usp7,Vps13d,Zbtb24
MP:0000693	spleen hyperplasia	0.00475	0.0496	54	4421	Common	Adam10,Bcl6,Bhlhe40,Bnip3l,Cbl,Cd86,Cdkn1a,Cdkn1b,Cdkn2c,Dido1,Fli1,Foxo3,Gba,Hmox1,Ikzf1,Il10rb,Il6st,Inpp5d,Irf8,Itgal,Kitl,Ldha,Lgals9,Lyn,Map3k7,Mark2,Mfge8,Nckap1l,Neu1,Pawr,Plcg2,Ppia,Ppm1d,Pten,Ptgs2,Ptpn2,Ptpn22,Ptprc,Rad50,Rc3h1,Sh2b3,Slc20a1,Spi1,Stk17b,Tank,Tnfaip8l2,Tnfrsf11a,Tnip1,Traf3ip2,Trap1,Trp53,Vcam1,Was,Zfp36
MP:0000120	malocclusion	0.00492	0.0512	28	4421	Common	4930453N24Rik,Antxr1,Atr,Baz1b,Cdo1,Ctsk,Diaph1,Dym,Ednra,Ehmt1,Erbb2,Fgfr2,Foxn3,Ibsp,Jag1,Lmna,Ltbp3,Mast4,Mecp2,Mmp14,Nphp3,Npr2,Nsd2,Papss2,Slc39a13,Smad4,Tgfb1,Tom1l2
MP:0008720	impaired neutrophil chemotaxis	0.00492	0.0512	28	4421	Common	Capg,Cd47,Chuk,Dock2,Flot1,Git2,Gsn,Ikbkb,Il1r1,Jagn1,Jam3,Mcoln2,Mpp1,Myo1f,Nckap1l,Npr1,Pde4b,Pde4d,Pik3cg,Pik3r5,Prex1,Rac1,Rac2,Serpinb1a,Slc37a4,Stat6,Tlr4,Wdr1
MP:0008813	decreased common myeloid progenitor cell number	0.00494	0.0514	36	4421	Common	Actl6a,Adar,Atg7,Bmi1,Brca2,Crebbp,Csnk1a1,Cxcl12,Ddrgk1,Dkc1,Elavl1,Ercc1,Gata2,Hif1a,Hip1,Idh1,Il6st,Jak2,Kat6a,Kdm1a,Kdm6a,Kmt2a,Kmt2e,Meis1,Msi2,Pbx1,Ptpn11,Rapgef2,Rassf2,Slc20a1,Slx4,Sod1,Spi1,Thoc5,Tle4,Trp53
MP:0009642	abnormal blood homeostasis	0.00501	0.052	1388	4421	Common	4930402H24Rik,Abca1,Abca3,Abca5,Abca6,Abcb7,Abcc3,Abcc4,Abcc9,Abcd3,Abcg2,Abhd5,Abraxas2,Acaa1a,Acaca,Acacb,Acad8,Acadl,Acadm,Acads,Acadvl,Acbd3,Ace,Ackr3,Acot13,Acot7,Acox1,Acsl5,Acss1,Acvr1,Acvr1b,Acvr2a,Acvrl1,Adam10,Adam17,Adar,Adcy3,Adcy6,Adgrf5,Adipoq,Adipor2,Adpgk,Aebp1,Afap1l2,Agap1,Agl,Agpat1,Agtrap,Ahcyl1,Ahi1,Ahr,Aif1,Aifm1,Akap9,Akr1b3,Aldh16a1,Aldh1a3,Aldh2,Alg2,Alms1,Amfr,Ampd2,Anap…
MP:0005640	abnormal mean corpuscular hemoglobin concentration	0.00502	0.0521	48	4421	Common	Abcb10,Add1,Agpat1,Ap4e1,Appl2,Atp6v0d1,Atp8a1,Cdk6,Chn1,Cops4,Cp,Crlf3,Dnajc10,Eif2b5,Epb41,Eps15,Exoc6,Fbxo9,Gpi1,Gpnmb,Hint1,Ireb2,Kif1b,Kitl,Lgmn,Myo1c,Nfkb1,Pacsin2,Ppp1r15b,Ppp5c,Prkab1,Prkag1,Rnf10,Rprd1b,Slc11a2,Slc38a10,Sox13,Sparc,Steap3,Tent5c,Tmem94,Tpi1,Trf,Trnt1,Ulk1,Usp12,Washc5,Zfp275
MP:0001727	abnormal embryo implantation	0.00508	0.0525	39	4421	Common	Adamts1,Axin1,B3galnt1,Btf3,C3,Cdc73,Cops2,Csf1,Cxxc1,Ddr1,Dicer1,Eif3h,Esr1,Fzd4,Ghr,Hspa5,Il11ra1,Il6st,Itgb1,Mcl1,Mga,Mrc1,Ncoa2,Ncoa6,Nos3,Nr2f2,Pcyt1a,Per1,Prmt1,Psmc3,Psmc4,Ptgs2,Ptpn11,Rint1,Rybp,Smarcb1,Tyrobp,Vezt,Wnt5a
MP:0002754	dilated heart right ventricle	0.00508	0.0525	39	4421	Common	Ackr3,Adam19,Atp2a2,Baz1b,Cav1,Cdh2,Crk,Des,Dnaja3,Edn1,Fbln5,Fbn1,Fgfr1,Gab1,Gja1,Hccs,Hmox1,Igf2r,Itgb1,Jup,Lmna,Mef2a,Nae1,Npr1,Ntf3,Pdgfb,Pdgfrb,Pdlim3,Pikfyve,Plce1,Plrg1,Ppp3ca,Rce1,Slco2a1,Sod2,Ssr1,Tfam,Tgfb2,Zmpste24
MP:0008527	embryonic lethality at implantation	0.00513	0.0529	21	4421	Common	B3galnt1,Cnot3,Ctcf,Egfr,Flii,Hspa5,Mbtps1,Mcl1,Med28,Pkm,Ptpn11,Rock1,Rpl38,Sap130,Smarcb1,Smg6,Tbp,Thoc1,Topbp1,Ube2q1,Vezt
MP:0010018	pulmonary vascular congestion	0.00513	0.0529	21	4421	Common	Abca3,Adipoq,Cryab,Dnm1l,Egln1,Epha3,Fstl1,Gbe1,Gnaq,Gys1,Kifap3,Lpl,Mef2d,Nos3,Pcyt1a,Pdlim7,Pecam1,Pikfyve,Ptger4,Shoc2,Slit3
MP:0014068	abnormal muscle glycogen level	0.00513	0.0529	21	4421	Common	Acacb,Agl,Cd36,Fnip1,Gbe1,Gys1,H6pd,Map3k7,Mcat,Mtor,Nuak1,Pfkfb3,Pfkm,Phka1,Pik3r4,Ppard,Prkab2,Prkag2,Rptor,Samd4,Sod2
MP:0001841	decreased level of surface class I molecules	0.00521	0.0532	8	4421	Common	B2m,Erap1,Prkdc,Psmb8,Stat1,Tap1,Tap2,Tapbp
MP:0003820	increased left ventricle systolic pressure	0.00521	0.0532	8	4421	Common	Ddah1,Egfr,Lpl,Map2k1,Nos3,Raf1,S100a1,Wrn
MP:0003840	abnormal coronal suture morphology	0.00521	0.0532	8	4421	Common	Fgfr2,Ift88,Itgb1bp1,Kat6b,Lmna,Lmnb1,Mmp2,Vegfa
MP:0004035	abnormal sublingual gland morphology	0.00521	0.0532	8	4421	Common	Ctnnd1,Ece1,Notch4,Prdm16,Rpgrip1l,Sec23b,Sh3pxd2a,Tk1
MP:0009922	increased transitional stage T1 B cell number	0.00521	0.0532	8	4421	Common	Adam10,Akap13,Arhgap17,Eps15,Lama5,Notch2,Ptpn22,Zfp365
MP:0010620	thick mitral valve	0.00521	0.0532	8	4421	Common	Cxcr4,Dchs1,Dock1,Efna1,Efnb2,Flna,Ntf3,Tgfb2
MP:0012779	abnormal brain cholesterol level	0.00521	0.0532	8	4421	Common	Hfe,Lrp1,Mbp,Mecp2,Npc1,Sc5d,Slc9a6,Srebf2
MP:0001406	abnormal gait	0.00522	0.0533	207	4421	Common	Acan,Aga,Agl,Aifm1,Ank,Ank3,Arl6ip1,Arsa,Aspa,Atg5,Atg7,Atm,Atp13a2,Atp7a,Atrn,Atxn1,Atxn7,Babam2,Bace1,Bckdk,Bicd2,Bmp4,Btd,Canx,Casp3,Cast,Cav1,Cerk,Chn1,Ciz1,Clcn3,Cln3,Cnp,Cntn1,Col1a2,Coq9,Cp,Cpe,Cstb,Ctsf,Dapk1,Dctn1,Ddhd2,Dixdc1,Dlg5,Dmd,Dnmt3a,Dst,Dync1li1,Ebf2,Efl1,Eif4e3,Elmod2,Enpp1,Epb41l3,Erbb2,Errfi1,Fgfr1,Fig4,Flnb,Fxr1,Fzd4,Gabbr1,Galc,Gars,Gas1,Gba,Gja1,Glb1,Glrb,Gnptab,Gosr2,Gsk…
MP:0004180	failure of initiation of embryo turning	0.00541	0.0551	31	4421	Common	Ankrd11,Dap3,Dhx30,Dkc1,Dlg3,Dnmt1,Enpp2,Fn1,Furin,Hus1,Kdm6a,Numb,Pdgfra,Poglut1,Prkar1a,Psmd4,Pten,Ptk2,Ptpn11,Ptpn12,Rbl2,Rnf111,Rttn,Slc31a1,Smad5,Srd5a3,Supt20,Tjp1,Txnrd1,Usp9x,Wasl
MP:0004181	abnormal carotid artery morphology	0.00541	0.0551	31	4421	Common	Atp11a,Brd2,Chd7,Chrd,Crim1,Crk,Dll4,Edn1,Ednra,Eng,Enpp1,F2r,Fbln1,Foxo1,Kctd10,Mkl2,Morc2a,Nsun2,Otulin,P2rx4,Podxl,Pth1r,Rala,Rpgrip1l,Sdhd,Sema3c,Setd5,Sh3pxd2a,Shc1,Tdg,Vegfa
MP:0002462	abnormal granulocyte physiology	0.0055	0.0558	123	4421	Common	Abcc1,Alox5ap,Arhgap15,Arhgap25,Arhgef1,B4galt1,Bcr,Btk,C3,C3ar1,C5ar1,Capg,Cav1,Cblb,Ccl2,Ccr1,Cd14,Cd300lf,Cd44,Cd47,Chuk,Clcn3,Cmklr1,Coro1a,Csk,Ctsc,Cttn,Ddx58,Dock2,Dusp1,Edil3,Enpp3,Entpd1,Fastk,Fcgr2b,Flot1,Fyn,G6pc3,Gab2,Git2,Gja1,Gnai2,Gsn,Hck,Hspb1,Hvcn1,Icam1,Icam2,Ikbkb,Il17ra,Il1r1,Il21r,Inpp5d,Itgal,Itgam,Itgb2,Jagn1,Jam3,Jdp2,Kdm6b,Kmt2e,Lcp1,Lgals3,Mcl1,Mcoln2,Milr1,Mitf,Mmp28,Mpp…
MP:0010280	increased skeletal tumor incidence	0.00551	0.0558	13	4421	Common	Acvr1,Apc,Ctnnb1,Ext1,Msh2,Nf2,Pik3ca,Prdx1,Prkar1a,Sav1,Smarca4,Trp53,Wif1
MP:0010556	thin ventricle myocardium compact layer	0.00551	0.0558	13	4421	Common	Atp2a2,Daam1,Ep300,Foxp1,Gja1,Nprl3,Pparg,Smad4,Sptbn1,Tbx18,Vegfa,Ywhae,Zfpm2
MP:0013834	thin hypoglossal nerve	0.00551	0.0558	13	4421	Common	4933434E20Rik,Capza2,Cmip,Cog6,Dbn1,Fut8,H13,Hmgxb3,Kif1bp,Nsun2,Polb,Rpgrip1l,Traf6
MP:0020252	abnormal collagen level	0.00551	0.0558	13	4421	Common	Adamts7,Bgn,Col4a1,Ddr2,Fam20c,Fam213a,Hmgcr,Hsd11b1,Igf1r,Itgb3,Pepd,Ppib,Sec23a
MP:0008557	abnormal interferon-alpha secretion	0.00552	0.0558	19	4421	Common	Azi2,Dhx58,Ifih1,Ifnar1,Ifnar2,Irak1,Irak2,Irak4,Irf1,Irf5,Irf7,Irf9,Map3k8,Mapk14,Mavs,Myd88,Peli1,Tank,Unc93b1
MP:0009379	abnormal foot pigmentation	0.00552	0.0558	19	4421	Common	Ap3b1,Cbl,Ednrb,Egfr,Gnaq,Hdac1,Hps5,Kitl,Lyst,Mdm4,Mitf,Myo5a,Nf1,Rack1,Rad50,Rpl27a,Rps19,Rps20,Trp53
MP:0008535	enlarged lateral ventricles	0.00554	0.0559	52	4421	Common	Adgra2,Ank2,Ap4e1,Arfgef1,Asns,Aspa,Aspm,Atp1b2,Atxn1l,B4galt2,Bbs2,Bbs4,Bbs7,Bicd2,Cacna1c,Cdc42,Cdon,Clcn3,Csf1r,D430042O09Rik,Ddb1,Ei24,Eif4h,Fgfr2,Fig4,Gja1,Hif1a,Hsf2,Htt,Lbr,Lztfl1,Magi2,Map1b,Mycbp2,Myh10,Nfix,Nrd1,Pdcd6ip,Phgdh,Prickle1,Prmt5,Ptbp2,Ptpn9,Rnd3,Sdccag8,Slc25a12,Spen,Tsku,Vac14,Vegfa,Wdfy3,Zfp423
MP:0010031	abnormal cranium size	0.00554	0.0559	52	4421	Common	Ankrd11,Chd7,Chuk,Crkl,Ddr2,Ddx10,Dym,Efnb1,Eif4h,Evc2,Eya1,Fam20c,Fbn1,Fgfr1,Fgfr2,Fgfrl1,Gja1,Gli3,Gtf2ird1,Hspg2,Ids,Ift80,Jam3,Lama2,Lmna,Lrp6,Map2k1,Map3k7,Mbtps1,Mmp14,Mmp16,Mnt,Nov,Npr2,Papss2,Pdgfra,Plcb1,Postn,Ptpn11,Raf1,Rpl38,Rps6ka3,Sh3pxd2b,Slx4,Smoc2,Sos1,Sox9,Sumf1,Tent5a,Tgfbr2,Trim37,Wasl
MP:0002835	abnormal cranial suture morphology	0.00558	0.0561	26	4421	Common	Ankrd11,Antxr1,Anxa1,Atr,Bmper,Casp3,Ehmt1,Fgfr1,Fgfr2,Gli3,Gtf2ird1,Ift88,Itgb1bp1,Kat6b,Lmna,Lmnb1,Mbtd1,Mmp14,Mmp2,Mn1,Nfix,Psen1,Sh3pxd2b,Sp3,Vegfa,Zmpste24
MP:0010871	abnormal trabecular bone mass	0.00558	0.0561	26	4421	Common	Cdk7,Cnot3,Csf1,Ctsk,Gab2,Gja1,Gsk3b,Itgb2,Ltbp3,Mcph1,Mgp,Nfix,P3h1,Plekhm1,Plxna1,Pparg,Rnf146,Slc39a14,Smurf1,Sost,Spon1,Spop,Src,Tle4,Tnfrsf11b,Tyrobp
MP:0013241	embryo tissue necrosis	0.00558	0.0561	26	4421	Common	Csk,Dlc1,Dll4,Eng,F3,G6pdx,Hsp90ab1,Jag1,Kdr,Map2k1,Map3k7,Metap2,Nfatc1,Numb,Pisd,Ptpn9,Rdh10,Rheb,Runx1,Slc25a19,Supt20,Tcf7l2,Tek,Tfrc,Tgfb1,Xbp1
MP:0002891	increased insulin sensitivity	0.00562	0.0564	93	4421	Common	Abcc9,Angptl2,Appl2,Arrdc3,Atf3,Atf6,Cbl,Ccdc3,Ccl2,Cebpb,Cept1,Ces1d,Cisd2,Clock,Cnot3,Crbn,Crebbp,Crtc2,Crtc3,Cyb5r4,Degs1,Dgat1,Dok1,Eprs,Fabp3,Fabp5,Fosl2,Foxo1,Gab1,Ghr,Grb10,Grb14,Gsk3a,Hif1an,Hmga1,Hmox1,Igf1r,Ikbke,Inpp5k,Inppl1,Insr,Ip6k1,Lclat1,Lnpep,Lrp6,Lrrc8c,Mapk8,Mapk8ip1,Mark2,Mbd5,Memo1,Mgll,Mpc1,Myd88,Ncoa3,Ncor1,Ncor2,Nln,Nos2,Nuak1,Pbx1,Phip,Pik3r1,Pip4k2b,Pparg,Ppp1r3c,Prkab1…
MP:0000104	abnormal sphenoid bone morphology	0.00572	0.0572	49	4421	Common	Apaf1,Bmper,Bnc2,Brd2,Cdon,Chrd,Chuk,Coro1c,Ctnnb1,Dhx35,Disp1,Ece1,Ednra,Eya1,Fgfr1,Fgfr2,Fgfrl1,Foxn3,Gja1,Gli3,Hand2,Hmgxb3,Hspg2,Ift140,Kif3a,Lmo4,Ltbp1,Ltbp3,Mn1,Morc2a,Nipbl,Nsun2,Pdgfra,Phc1,Pkdcc,Prrx1,Rara,Rarg,Rpgrip1l,Scube1,Sh3pxd2a,Smg9,Smo,Sox9,Sp3,Ssr2,Tcf7l2,Tgfb2,Zeb1
MP:0010412	atrioventricular septal defect	0.00572	0.0572	49	4421	Common	Adamts6,Anks6,Ap2b1,Bicc1,Bmp4,Bmpr2,Brd2,Cc2d2a,Cep290,Cplane1,Cyr61,Dock1,Dync2h1,Ehmt1,Evl,Fuz,Ift140,Ift172,Ift74,Kat6a,Lama5,Lrp1,Mapk7,Megf8,Myh10,Ndst1,Nr1d2,Nxn,Pcnt,Pcsk5,Pdgfrb,Pds5a,Pds5b,Pepd,Pkd2,Plxnd1,Ptpn11,Qsox1,Smarca4,Smg9,Snx17,Spry2,Srsf10,Tgfb2,Tmem67,Trappc10,Wnt5a,Zbtb14,Zfpm2
MP:0001723	disorganized yolk sac vascular plexus	0.00579	0.0578	17	4421	Common	Arnt,F3,Fbxw7,Flt1,Fn1,Hif1a,Kat7,Nrp1,Pdzrn3,Pkn2,Plpp3,Ppp3r1,Ptk2,Smad5,Ubp1,Vps52,Yap1
MP:0004721	abnormal platelet dense granule morphology	0.00579	0.0578	17	4421	Common	Ap3b1,Bloc1s5,Bloc1s6,Dock7,Hps1,Hps3,Hps4,Hps5,Itgb1,Lyst,Orai1,Pdia4,Pik3cg,Ptgs2,Rab27a,Rabggta,Wdr1
MP:0009378	abnormal endoplasmic reticulum morphology	0.00579	0.0578	17	4421	Common	Abcg2,Atp2c1,Clec16a,Col4a3bp,Dnajb9,Ell2,Fkbp10,Gclc,Lman1,Magi2,Pex5,Plau,Sel1l,Srsf3,Tlr2,Trip11,Xbp1
MP:0001657	abnormal induced morbidity/mortality	0.00585	0.0581	293	4421	Common	Abcc1,Abcc10,Abcc4,Acadvl,Ace,Adam17,Adgre5,Adh1,Adh5,Adipoq,Adm,Aebp1,Agbl5,Ahr,Aifm1,Aldh2,Als2,Angptl4,Antxr2,Anxa1,Apod,Ash1l,Atf6,Atg3,Atg5,Atm,Atp1b1,Atp2a2,B2m,B4galt1,Bche,Bcl3,Bid,Blmh,Brca2,Btk,C3,C3ar1,C4b,C5ar1,Camk2d,Camk2g,Casp4,Casp8,Cat,Cav1,Ccl2,Ccng1,Ccr1,Cd14,Cd1d1,Cd200r1,Cd274,Cd36,Cd44,Cd47,Cdkn1a,Cerk,Cfp,Clcn3,Clec4d,Clic4,Cnnm4,Cops6,Cox15,Cx3cr1,Cxcr4,Cyld,Dclre1a,Ddx60,…
MP:0003083	abnormal tibialis anterior morphology	0.00585	0.0581	15	4421	Common	Fkrp,Flnc,Gars,H6pd,Lmna,Mtm1,Mtor,Rnd3,Rps6kb1,Selenon,Sgcb,Sgcg,Sod1,Sod2,Zfp106
MP:0010836	decreased CD4-positive, alpha-beta memory T cell number	0.00585	0.0581	15	4421	Common	Clpp,Dctn1,Irf5,Nfkb1,Nfkbia,Prkdc,Ptprc,Sept9,Slc1a5,Tap2,Usp5,Vamp3,Zfp335,Zfp408,Zfp84
MP:0002745	abnormal atrioventricular valve morphology	0.00594	0.059	43	4421	Common	Acvr1,Adam17,Adam19,Anks6,Arid2,Bmp4,Bmpr1a,Braf,Cc2d2a,Cntrl,Crebbp,Cxcr4,Cyr61,Dchs1,Dock1,Efna1,Efnb2,Ehmt1,Fbn1,Fgfrl1,Flna,Gja5,Hand2,Hprt,Ift140,Igf2r,Megf8,Nf1,Nfatc1,Nr1d2,Ntf3,Pdlim7,Ptpn11,Sap130,Sh3pxd2b,Shoc2,Sirt1,Smad6,Sox9,Tgfb2,Tns1,Xpnpep1,Zfpm2
MP:0004966	abnormal inner cell mass proliferation	0.00594	0.059	43	4421	Common	Ahctf1,Cdc73,Cenpe,Chordc1,Cops2,Cops5,Cops8,Dab2,Ezh2,Gata6,Grb2,Hsd17b12,Hspa5,Kat8,Max,Mcm4,Med28,Mtor,Nbn,Ncapg2,Paxip1,Prmt5,Prpf19,Psmd4,Rptor,Ruvbl1,Sbds,Setdb1,Smad4,Smarca5,Smarcb1,Smg6,Stat3,Taf10,Tardbp,Terf1,Tex10,Thap11,Top3a,Tsg101,Txn1,Zfp24,Zpr1
MP:0000455	abnormal maxilla morphology	0.00596	0.059	74	4421	Common	Abhd5,Apaf1,Arid1a,Arid5b,Atpaf2,Bmp4,Bnc2,Brd4,Cask,Cdon,Crebbp,Ctnnb1,Daam2,Disp1,Dlg1,Ednra,Ednrb,Eya1,Fam20c,Fbln1,Fgfr2,Fuz,Gas1,Gja1,Glg1,Gli3,Hand2,Hipk2,Hoxa3,Ift140,Jag1,Kat14,Kif3a,Kmt2d,Lmna,Lrrk1,Ltbp1,Ltbp3,Map3k7,Mapk1,Mbtps1,Miga2,Mmp14,Mmp2,Mn1,Nabp2,Nipbl,Nisch,Npr2,Ostm1,Pak1ip1,Pkdcc,Prdm16,Prickle1,Prrx1,Rbbp7,Rpgrip1l,Ryk,Setd5,Sh3pxd2b,Sirt1,Slc38a10,Slc39a13,Smo,Smoc1,Sox9,…
MP:0000852	small cerebellum	0.00596	0.059	74	4421	Common	Acp2,Agtpbp1,Ahi1,Aifm1,Ank3,Arfgef1,Bicd2,Bmi1,Braf,Ccnd2,Clcc1,Cntn1,Cstb,Ctnnb1,Ddb1,Dnm1l,Ebf2,Egfr,Eif4h,Fbxw7,Foxp2,Fzd4,Gas1,Gja1,Gnpat,Gnptab,Hsd17b4,Huwe1,Inpp4a,Itgb1,Jam3,Ldb1,Lig3,Lrp8,Met,Mfn2,Mib1,Mthfr,Myh10,Nbn,Npc1,Nsdhl,Numb,Pdha1,Pex2,Pfdn5,Plaa,Plcb4,Pomgnt1,Prkab1,Prnp,Psap,Ptrh2,Pura,Rbfox2,Reln,Rpgrip1l,Rpl27a,Smo,Sun1,Tbp,Thrb,Tmem67,Trio,Trp53,Tubb2b,Tubb5,Txnrd1,Ube3a,Us…
MP:0002490	abnormal immunoglobulin level	0.00621	0.0612	253	4421	Common	Abcb1a,Adcy9,Akap13,Arhgef1,Ash1l,Atf3,Atm,Atmin,B2m,B3gnt5,Bax,Bbs4,Bbx,Bcl10,Bcl2l1,Bcl3,Bcl6,Bhlhe40,Birc3,Blnk,Bmi1,Bst1,Btk,C3ar1,Cabin1,Casp8,Ccl2,Ccr1,Ccr5,Cd180,Cd1d1,Cd22,Cd274,Cd36,Cd37,Cd59a,Cd72,Cd74,Cd81,Cd83,Cd84,Cd86,Cdkn1a,Cebpb,Ciita,Clec4d,Ctss,Cxcr4,Cyld,Dapp1,Dbnl,Dck,Def6,Dhrs4,Diaph1,Dicer1,Dkk3,Dock2,Dock8,Dok1,Ebf1,Ecm1,Efs,Ehmt2,Ell2,Enpp3,Ep300,Esr1,Ezh2,Fas,Fcgr1,Fcgr2b…
MP:0004157	interrupted aortic arch	0.00621	0.0612	29	4421	Common	Atmin,Bmp4,Bmpr2,Brd2,Chd7,Crkl,Dynll1,Ece1,Ermp1,Eya1,Flna,Gata6,Hand2,Hprt,Kat6a,Lama5,Ltbp1,Matr3,Mkl2,Ndst1,Nprl3,Sema3c,Smg9,Ssr2,Tab1,Tgfb2,Tgfbr2,Tmem67,Vegfa
MP:0010868	increased bone trabecula number	0.00621	0.0612	29	4421	Common	Cav1,Cd68,Cebpb,Csf1,Ctsk,F2r,Farp2,Fos,Fosl2,Hivep3,Ibsp,Jdp2,Lrrk1,Nbr1,Ncor2,Npy1r,Pdia3,Plekhm1,Pparg,Ptpn2,Sh3bp2,Slc39a14,Snx10,Socs2,Sost,Thra,Tmem64,Tnfrsf11a,Tyrobp
MP:0013971	blood in lymph vessels	0.00621	0.0612	29	4421	Common	4933434E20Rik,Adcy9,Atg16l1,Brd2,Capza2,Col4a2,Coro1c,Cpt2,Crim1,Dmxl2,Fut8,H13,Hmgxb3,Kif1bp,Morc2a,Myo9a,Npat,Ogdh,Prmt7,Pth1r,Rala,Setd5,Sh3pxd2a,Smg9,Tent5c,Traf6,Trappc9,Xpnpep1,Zmynd11
MP:0003658	abnormal capillary morphology	0.00623	0.0613	53	4421	Common	Angptl4,Bcam,Ccl2,Cfh,Clu,Col15a1,Col4a1,Crim1,Dll4,Efemp1,Egln1,Elavl1,Eng,Fas,Fbln1,Fli1,Golm1,Hsd17b7,Itga3,Itgb1,Itgb8,Lama4,Lama5,Ldb1,Lpl,Magi2,Mark2,Meis1,Mgp,Mpv17,Myo1e,Nfe2l2,Nid1,Nos3,Notch2,P4ha1,Pdgfb,Pdgfrb,Plvap,Podxl,Prkci,Psen1,Pten,Ptger4,Ptk2,Rrm2b,Snx13,Tab1,Traf3ip2,Unc5b,Vegfa,Wasf2,Zmiz1
MP:0001409	increased stereotypic behavior	0.0063	0.0617	24	4421	Common	Adgrl3,Adm,Arhgap32,Arhgef11,Arpc3,Cacna1c,Crebbp,Eif4e,Eif4ebp2,Ext1,Fez1,Fmr1,Htra2,Impa1,Mecp2,Nbn,Ncstn,Nlgn2,Nr4a2,Pten,Shank3,Tnc,Tor1a,Zdhhc17
MP:0004486	decreased response of heart to induced stress	0.0063	0.0617	24	4421	Common	Acp1,Camk2d,Camta2,Ctnnb1,Dusp6,Edn1,Ednrb,Fhl1,Fstl1,Kdm4a,Maoa,Map3k2,Map3k5,Nfatc3,Nox4,Plce1,Ppp3cb,Prkca,Rassf1,Rcan1,Rps6ka2,Slc9a1,Tcap,Tlr4
MP:0008102	lymph node hyperplasia	0.0063	0.0617	24	4421	Common	Bhlhe40,Birc3,Cd86,Cdkn1a,Ciz1,Ctsl,Dennd1b,Fas,Ikzf1,Il6st,Irf2,Itgal,Lgals9,Lyn,Mark2,Nfatc2,Prkdc,Pten,Ptpn2,Ptprc,Tank,Tnip1,Traf3,Traf3ip2
MP:0020203	abnormal mast cell number	0.0063	0.0617	24	4421	Common	Apc,C3,Casp8,Ccr1,Cd44,Ctnnb1,Enpp3,Fbn1,Gab2,Itgb7,Kitl,Lyn,Map3k14,Mcl1,Mitf,Ndst2,Rabgef1,Runx1,Selp,Spred1,Srgn,Stat5a,Vegfa,Wls
MP:0001393	ataxia	0.00635	0.0621	145	4421	Common	Aars,Abhd12,Acp2,Aff1,Aga,Agtpbp1,Aifm1,Ank3,Apba1,Arcn1,Arhgap10,Arsa,Aspa,Atf2,Atg5,Atg7,Atm,Atp7a,Atxn1,Atxn7,Bdnf,Bloc1s6,Bmi1,Canx,Ccm2,Cdkn2c,Cfl1,Chp1,Clcc1,Cln8,Cnp,Cntn1,Csf1r,Cstb,Ctsa,Ctsd,Dnajc5,Dst,Ei24,Eif2b4,Eif2b5,Epb41l3,Erbb2,Ercc1,Etv1,F3,Fdft1,Fzd4,Galc,Gja1,Glb1,Gnaq,Gnptab,Hexb,Hmbs,Hprt,Hsd17b4,Htra2,Ifit2,Ikbkap,Inpp4a,Ireb2,Itgav,Itgb1,Itpa,Itpr1,Kcnma1,Kmt2a,Lama2,Lama4,…
MP:0010210	abnormal circulating cytokine level	0.00637	0.0623	155	4421	Common	Adam17,Adar,Apc,Arid5a,Arrb2,Asah1,Ash1l,Atg16l1,B4galt1,Brd2,C3,C3ar1,C5ar1,Casp4,Cav1,Ccl2,Ccr1,Cd14,Cd163,Cd44,Cebpb,Clec4d,Clic4,Csf1r,Ctsc,Cxcl16,Ddx60,Dhx58,Dnase2a,Dusp1,Egfr,Egr1,Elavl1,Enpp2,F3,Fos,Foxo1,Gba,Ghr,Gnai2,Gpr183,Hcfc2,Hck,Hdac6,Hexb,Hmgb1,Hmox1,Hnrnpd,Hspb8,Ifit2,Ifnar1,Ifngr1,Ikbkb,Il10ra,Il13ra1,Il18bp,Il1r1,Il1rn,Il4ra,Il6ra,Il6st,Inpp5d,Irak2,Irak4,Irf1,Irf3,Irf5,Irf7,Ir…
MP:0002133	abnormal respiratory system physiology	0.0064	0.0624	403	4421	Common	Abca1,Abca3,Acan,Ackr3,Acvrl1,Adam17,Adamts2,Adamts7,Adgrf5,Adipoq,Adk,Adm,Aff4,Aggf1,Agl,Ahr,Aimp1,Akna,Aldh1a3,Ap1b1,Ap3b1,App,Aqp1,Arhgap5,Arid4a,Arih2,Arl13b,Asah1,Ash1l,Atf2,Atf3,Atox1,Atp1a2,Atp1b1,Atp2a2,Atp7a,Bag3,Bag6,Bcl6,Bdnf,Bloc1s6,Bmi1,Bmp4,Bmper,Bmpr1a,Bmpr2,Braf,C3ar1,Cadps,Caprin1,Carm1,Cask,Cav1,Ccr1,Cd14,Cd163,Cd1d1,Cd300lf,Cd44,Cd47,Cd59a,Cd72,Cdc42,Cdc73,Cdk5,Cebpd,Chd2,Cisd2…
MP:0000934	abnormal telencephalon development	0.00646	0.063	75	4421	Common	Adgra2,Adgrg1,Ambra1,Apaf1,Aph1a,Braf,Brpf1,Casp9,Cdc42,Cdh2,Cdk5,Cep63,Chd7,Ctnnb1,Emg1,Eml1,Fbxw7,Gak,Gja1,Gli3,Gnb1,Hif1a,Hsd17b7,Hspa5,Ikbkap,Il6st,Itga6,Itgb1,Kat2a,Kat6b,Lamc1,Lemd2,Manf,Map1b,Marcks,Mcph1,Med1,Mlst8,Mtor,Napa,Ncaph2,Ncor2,Ndel1,Ntrk2,Numb,Pard3,Pcnt,Pcsk6,Pomt2,Prmt5,Psen1,Ptbp2,Pten,Ptpn6,Rbm8a,Reln,Rere,Rest,Sec23a,Setdb1,Smarca1,Sptan1,Ssbp3,Synpo,Tcf7l1,Tctn1,Tdg,Tgif1…
MP:0006035	abnormal mitochondrion morphology	0.00651	0.0634	87	4421	Common	Aars,Abcb10,Abcc9,Abcg2,Acad8,Adgrg6,Aifm1,Atg5,Bcl2l2,Cbl,Cd44,Cisd2,Clec16a,Clpp,Cluh,Col4a3bp,Col6a3,Cox15,Ctns,Dap3,Des,Dnaja3,Dnajc11,Dnm1l,Dst,Egln1,Gclc,Hdac3,Hgsnat,Hmgcl,Hprt,Hspd1,Htra2,Insr,Kif5b,Lrpprc,Lrrk2,Mcu,Med1,Mfn1,Mfn2,Micu2,Mkl1,Mpv17,Mto1,Mtor,Mut,Ncoa3,Ncor1,Ndufs4,Ndufs6,Nr2f2,Opa1,Pex13,Pex5,Phb2,Phc1,Pik3c3,Pink1,Pisd,Plec,Pnpt1,Ppard,Prdm16,Prkg1,Ptcd2,Pus1,Rab7,Rb1cc1,…
MP:0010833	abnormal memory T cell morphology	0.00651	0.0634	79	4421	Common	Acaca,Arhgef1,Atp5f1,Bap1,Bcl2l1,Bcl3,Casp8,Cd22,Cdkn1a,Clpp,Cog6,Coro1a,Ctr9,Dap,Dck,Dctn1,Ddhd1,Ddx58,Def6,Dennd4c,Diaph1,Dnmt3a,Elmo1,Ets1,Fam96a,Fas,Fbxo7,Gmds,Grk6,Hbs1l,Hibadh,Hnrnpll,Id3,Ikbkb,Il7r,Irf2,Irf5,Man2a1,Map3k7,Mkrn2,Mlec,Naga,Nfil3,Nfkb1,Nfkbia,Pik3r1,Ppp3cb,Prkch,Prkdc,Ptpn22,Ptprc,Rac2,Rras2,Rwdd1,Sarnp,Sept9,Sgms1,Slc1a5,Stk17b,Stk4,Tap1,Tap2,Tent5c,Tgfbr2,Tnfsf13b,Tnip1,Tpp…
MP:0001783	decreased white adipose tissue amount	0.00668	0.0648	47	4421	Common	Acot13,Aebp1,Arid5b,Ate1,Atf3,Braf,Bscl2,C3,Cav1,Cbl,Chd2,Crebbp,Dnajc15,Dock7,E2f3,Eif4ebp1,Gpd2,Gusb,Id2,Lipa,Lipe,Lmna,Lrrc8c,Mark2,Mark3,Mcat,Med13,Memo1,Mlxipl,Ncoa3,Nipbl,Nos2,Phyh,Plvap,Pparg,Prkar1a,Ptpn1,Rbl1,Rhbdf1,Rps6ka3,Sgms1,Sh3pxd2b,Sirt1,Slc16a1,Sod1,Tkt,Zdhhc13
MP:0010955	abnormal respiratory electron transport chain	0.00668	0.0648	47	4421	Common	Abcg2,Adipoq,Aifm1,Apaf1,Casp9,Cav1,Chchd10,Cisd1,Cisd2,Coq9,Dnaja3,Dnajc15,Dnm1l,Hccs,Hspd1,Htra2,Lclat1,Lmna,Mfn2,Mterf3,Mtfr1,Mut,Ndufs4,Ndufs6,Nr2f2,Opa1,Pex5,Pink1,Pnpt1,Ppard,Ptcd2,Rnaseh1,Sdhd,Shmt2,Sod2,Sqstm1,Tfam,Tgm2,Thra,Tk2,Trp53inp1,Tspo,Uqcrfs1,Vdac3,Zfp106,mt-Co1,mt-Nd6
MP:0003725	increased autoantibody level	0.00677	0.0657	68	4421	Common	Ash1l,Bhlhe40,Blnk,C1qa,C4b,Cd1d1,Cd22,Cd276,Cd72,Cd86,Cdkn1a,Def6,Ep300,Esr1,Fas,Fbn1,Fcgr2b,Foxo1,Gadd45a,Gpx7,Grk6,H2-Ab1,Id3,Ifih1,Il10ra,Il6st,Irak3,Itgav,Jak1,Lbr,Lyn,Mfge8,Mta2,Nfe2l2,Nfkbia,Pik3c2a,Plcg1,Plcl2,Polb,Pparg,Prkcd,Ptpn22,Ptpn6,Ptprc,Rc3h1,Rnf128,Scara5,Senp1,Sirt1,Stk17b,Swap70,Tank,Tbk1,Tgfb1,Thbs1,Tlr8,Tnfaip3,Tnfsf13b,Tnip1,Tpp2,Traf3,Traf3ip2,Trove2,Tyrobp,Unc93b1,Was,Wip…
MP:0005331	insulin resistance	0.00681	0.0659	96	4421	Common	Adipoq,Adipor2,Alms1,Angptl2,Ank2,Ankrd26,Appl1,Atm,Bdnf,Blvra,Bscl2,C1qtnf1,Cav1,Cavin1,Ccar2,Ccl2,Clock,Col5a3,Cpe,Crat,Crebbp,Cspg4,Ehmt1,Esr1,Fabp4,Fosl2,Foxo1,Gpam,Grb10,Hadha,Hmga1,Il1r1,Il6ra,Insr,Irs1,Kbtbd2,Kdm3a,Kmt2b,Lcmt1,Lipa,Lipe,Lmna,Lnpep,Lpin1,Lrp6,Mgat4a,Mlxipl,Ncoa3,Ncoa5,Ncor2,Nfe2l1,Nos3,Nr2f2,Osmr,Pde3b,Pik3ca,Pik3cb,Pikfyve,Pla2g16,Plscr3,Ppard,Pparg,Ppp1r3c,Ppp2r2a,Prdx3,P…
MP:0003331	increased hepatocellular carcinoma incidence	0.00684	0.0661	44	4421	Common	Acox1,Anxa7,Apc,Atm,Becn1,Cbx7,Ccdc80,Ccndbp1,Cdkn1a,Cers2,Fah,Fbxo4,Hip1,Htatip2,Iqgap2,Lgals3,Map3k7,Mcm4,Mcm9,Nabp2,Ncoa5,Ndrg2,Nf2,Nfe2l1,Plau,Prdx1,Prkar1a,Psmb9,Pten,Ranbp2,Rassf1,Rint1,S100a4,Sav1,Sirt2,Smurf2,Sod1,Sptbn1,Stag1,Tpx2,Trim24,Trp53,Txnip,Uaca
MP:0008083	decreased single-positive T cell number	0.00684	0.0661	44	4421	Common	Aff1,Atm,Caml,Cbl,Cflar,Cops5,Ctcf,Dock2,Elk4,Ep300,Fbxw7,H2-Ab1,Hax1,Hivep2,Htra2,Ikbkb,Lcp2,Map3k3,Map3k7,Mcl1,Nfkb1,Nmt1,Nmt2,Noc2l,Nr3c1,Pknox1,Pnp,Ppp3cb,Ppp4c,Prkdc,Ptpn2,Ptprc,Rbpj,Rfx5,Rictor,Runx1,Sept9,Sgpl1,Shc1,Smarca4,Stk17b,Vav1,Xrcc6,Zfp335
MP:0002495	increased IgA level	0.00694	0.067	41	4421	Common	Abcb1a,Ash1l,Bax,Bbx,Birc3,Cd81,Cyld,Efs,Fas,Fcgr2b,Gnai2,Ifih1,Il13ra1,Il6st,Itch,Itgb2,Jak1,Lyn,Man2a1,Myd88,Nfatc1,Nfkbia,Nipal3,Npy1r,Otud7b,Pik3c2a,Prkcd,Ptpn6,Ptprc,Pycard,Stat6,Tank,Tbk1,Tnfaip3,Tnfsf13b,Tnip1,Traf3,Vsir,Was,Wipf1,Zc3h12a
MP:0020174	abnormal IgG level	0.00702	0.0677	200	4421	Common	Abcb1a,Adcy9,Akap13,Arhgef1,Ash1l,Atf3,Atm,Atmin,B2m,B3gnt5,Bax,Bcl10,Bcl2l1,Bcl3,Bcl6,Bhlhe40,Birc3,Blnk,Bst1,Btk,C3ar1,Cabin1,Casp8,Ccl2,Ccr1,Ccr5,Cd180,Cd1d1,Cd22,Cd274,Cd36,Cd37,Cd59a,Cd81,Cd83,Cd84,Cd86,Cdkn1a,Cebpb,Ciita,Clec4d,Ctss,Cxcr4,Cyld,Dapp1,Dbnl,Dck,Def6,Dhrs4,Dock2,Dock8,Ebf1,Efs,Ehmt2,Ell2,Ep300,Esr1,Ezh2,Fas,Fcgr1,Fcgr2b,Fcgrt,Fli1,Fnip1,Fyn,Gadd45a,Galnt1,Ggta1,Glt8d2,Gnai2,Grb…
MP:0002706	abnormal kidney size	0.00716	0.069	158	4421	Common	Ace,Adamts1,Aga,Ahi1,Alms1,Ankrd26,Ap4e1,Apc,Arhgap1,Arhgap35,Arid1b,Arid5b,Arl13b,Arl3,Ate1,Atg5,Atmin,Atp7a,Atr,Bag6,Bckdk,Bicc1,Bmp4,Bmper,Boc,Brd2,Bscl2,Cav1,Cd1d1,Cdc42,Cdc73,Cdkn1a,Cdkn1b,Cir1,Crim1,Ctdnep1,Ctnnb1,Ctnnd1,Cyp27a1,Dchs1,Dcn,Dicer1,Dkc1,Dlg1,Efemp1,Eif3m,Erap1,Eya1,Fads2,Fah,Fan1,Fat4,Fgfr2,Flcn,Fryl,Fstl1,Fzd4,Gata2,Gcdh,Gdf10,Ghr,Glis2,Gnpda1,Golm1,Gstz1,H13,Hhipl1,Hipk2,Hp,…
MP:0000135	decreased compact bone thickness	0.00727	0.07	51	4421	Common	Adam17,Akr1a1,Ank,Arhgap1,Atr,Bgn,Cnot3,Col1a2,Creb3l1,Csf1,Csf1r,Ctns,Ebf2,Eif2ak3,Esr1,F2r,Fam20c,Fermt2,Fig4,Flnb,Galc,Ibsp,Ifngr1,Il6st,Inpp5d,Irak3,Irs1,Kitl,Klf10,Lmna,Ncor2,Nfix,Notch2,P3h4,Ppib,Rnf146,Samd4,Sfrp4,Slc30a5,Slc39a13,Smad4,Snx10,Src,Suco,Tent5a,Thra,Thrb,Tle4,Tmem119,Tnfrsf11a,Zmpste24
MP:0000701	abnormal lymph node size	0.00735	0.0706	115	4421	Common	Ap4e1,Arhgef6,Asah1,Atm,Atp6v1b2,B3gnt5,Bcl3,Bhlhe40,Birc3,C9orf72,Casp8,Cbl,Cd200,Cd86,Cdkn1a,Cdkn2c,Cebpb,Chd2,Chd4,Chst3,Ciz1,Coro1a,Ctsl,Cyld,Cytip,Ddost,Def6,Dennd1b,Dicer1,Dock2,Drosha,Elavl1,Ep300,Ezh2,Fas,Fcgr2b,Foxo1,Foxo3,Galnt1,Gtpbp2,H2-Aa,Hmox1,Ifi44,Ikzf1,Il6st,Il7r,Inpp5d,Irf2,Irf8,Itch,Itgal,Itgb2,Kmt2e,Lbr,Lcp2,Lgals9,Lpin2,Lyn,Man2b2,Map3k14,Map3k7,Mark2,Mcm4,Mgat2,Nckap1l,Nedd9…
MP:0000759	abnormal skeletal muscle morphology	0.0074	0.071	213	4421	Common	4933434E20Rik,Acacb,Acads,Acadvl,Acvr1,Adam12,Adam19,Adarb1,Adipoq,Agl,Agtpbp1,Aifm1,Als2,App,B4gat1,Bace1,Bag3,Cav1,Cav2,Ccl2,Cd163,Cd36,Cdc73,Cebpb,Cfl2,Cisd2,Clcc1,Clip3,Col12a1,Col6a1,Col6a3,Cox15,Cryab,Csf1,Ctss,Dag1,Des,Dmd,Dnajc5,Dnase2a,Dnm2,Dock1,Drosha,Dst,Dusp1,Dusp6,Dysf,Ednrb,Efemp1,Egln2,Eif2ak4,Emd,Ep300,Erbb2,Ercc1,Esr1,Etv1,Eya1,Fat1,Fbn1,Fgfr2,Fgfrl1,Fhl1,Fkrp,Flnc,Fnip1,Foxj3,F…
MP:0002111	abnormal tail morphology	0.00743	0.0713	180	4421	Common	Acan,Adamts9,Aebp1,Aebp2,Angptl2,Ap3b1,Ap4e1,Apaf1,Apc,Atg7,Atp2b1,Atp5b,Atp6v1d,Atp7a,Axin1,Blmh,Bmper,Bmpr1a,Brca2,Brd7,Cask,Cbl,Chuk,Clec16a,Cnot4,Col1a2,Col4a2,Coq6,Crkl,Crtc3,Csf1,Csf1r,Ctgf,Cyld,Cyp51,Dact1,Dchs1,Dctn1,Dgat2,Dlg1,Dock7,Dpf2,Dse,Dst,Dvl2,Ednrb,Epha2,Erbb2,F2r,Fat4,Fgfr1,Fgfr2,Fn1,Fos,Foxo1,Fzd7,Ggnbp2,Glg1,Gnaq,Gusb,H13,Hdac1,Hfe,Hmga1,Hps1,Hps5,Hsp90aa1,Ift140,Igf2r,Irs1,Ja…
MP:0001303	abnormal lens morphology	0.00748	0.0716	149	4421	Common	4933434E20Rik,Abcd1,Acbd3,Adam17,Adamtsl4,Aff1,Agap1,Agl,Agps,Aif1,Aldh1a3,Alkbh1,Ank2,Anxa3,Ap3b1,Ap4e1,Apaf1,Atp11a,Atp5g2,Atraid,Bcar3,Bmp2k,Bmp4,Bms1,Braf,Brd1,Brd2,Brd4,Cant1,Cap2,Casp3,Cdc14b,Cdkal1,Chd7,Cog3,Col4a1,Col4a2,Col4a3bp,Cotl1,Cpox,Crim1,Cryab,Csk,Ctnnb1,Cystm1,Dctn5,Ddb1,Dis3,Dlg1,Dmd,Dock5,Dstn,Egfr,Ell2,Epc2,Epha2,Fabp3,Fat1,Fgfr1op,Gas1,Gclc,Gfpt2,Glrx,Gnpat,Golga1,Gpx1,Hif1a…
MP:0004952	increased spleen weight	0.00753	0.072	77	4421	Common	Adam10,Ahr,Asah1,Bok,Braf,C4b,Cd72,Cdkn1a,Cdkn1b,Coro1a,Csf1r,Dbnl,Dck,Diaph1,Dido1,Dusp6,Egln1,Egr1,Ep300,Epas1,Fas,Fech,Gba,Glmp,Gpi1,Grk6,Hgsnat,Hk1,Il10rb,Inpp5d,Jak2,Kdm6a,Klf3,Ldha,Lgmn,Lipa,Mark2,Mfge8,Ndfip1,Nfe2l2,Nfkb2,Notch2,Npm1,P2ry14,Pfkm,Pgm3,Pla2g15,Ppp1r15a,Prdx1,Prep,Prkaa1,Prkab1,Procr,Pten,Ptpn11,Rc3h1,Rictor,Runx1,Ryr2,Slc11a2,Slc20a1,Slc7a7,Spi1,Steap3,Stk17b,Tbk1,Tet2,Tlr4,…
MP:0005282	decreased fatty acid level	0.00754	0.072	81	4421	Common	Abhd5,Acaca,Acacb,Acot13,Bscl2,C1qtnf1,Cav1,Cbl,Cc2d1b,Ccl2,Ccny,Cd36,Cebpb,Ces1d,Chn1,Chuk,Cidea,Crat,Crbn,Crebbp,Crtc3,Dclk1,Dgat2,Dip2b,Dixdc1,Dnajc15,Dpy19l3,Dusp1,Fabp3,Fads2,Fads3,Faf2,Foxo1,Gab1,Gk,Hmox1,Ift80,Il4ra,Inpp5k,Inppl1,Insr,Kif26b,Lacc1,Lipe,Lpin1,Lpin2,Lrp1,Mgll,Mier1,Mindy1,Mlxipl,Ncoa3,Nr2f2,Nsun2,Pabpc4,Pex1,Pex7,Phyh,Pikfyve,Pla2g16,Plin2,Pparg,Pten,Rarres2,Rint1,Rnf169,Roc…
MP:0004978	decreased B-1 B cell number	0.00755	0.0721	48	4421	Common	Arhgef1,Bcl10,Bcl3,Blnk,Bst1,Btk,Casp8,Cd81,Cxcr4,Cyld,Dapp1,Diaph1,Dock8,Ebf1,Ets1,Fnip1,Hax1,Huwe1,Ikbkb,Ikzf1,Il6st,Il7r,Lyn,Map3k14,Map3k7,Nfatc1,Notch2,Pfdn1,Pik3ap1,Pik3r1,Plcl2,Pou2f2,Ppp2r3c,Prkdc,Ptpn2,Ptprc,Rac2,Rnf31,Sema4d,Sh3bp2,Sh3kbp1,Spi1,Sppl2a,Srf,Tlr8,Tnfaip3,Vav1,Zeb1
MP:0001846	increased inflammatory response	0.00761	0.0725	479	4421	Common	Abca1,Abcb1a,Abcc4,Abcg2,Abhd5,Acan,Ace,Ackr3,Acox1,Acvr1,Adam17,Adam8,Adamts5,Adm,Ahi1,Ahr,Aif1,Akap12,Akna,Alms1,Alox5ap,Als2,Amfr,Angptl2,Ank,Anxa1,Anxa7,Apc,App,Arhgap25,Arid5b,Arih2,Arl3,Arrb2,Ash1l,Atf2,Atf3,Atg16l1,Atp7a,Atr,B2m,B4galt1,Bap1,Bcl6,Bcr,Bgn,Bin1,Blmh,Bloc1s6,Bmi1,Bmpr1a,Bmx,Btk,C1qa,C3,C3ar1,C4b,Cacna1c,Camk2g,Cap2,Casp8,Cav1,Ccl2,Ccm2,Ccr1,Ccr5,Cd109,Cd163,Cd1d1,Cd200,Cd274,…
MP:0000157	abnormal sternum morphology	0.00767	0.0729	98	4421	Common	Adamts2,Adamts6,Alkbh1,Apc,Arid5b,Ash1l,Bmp4,Bmp6,Bmpr1b,Bmpr2,Brca2,Cdc42,Chuk,Col27a1,Cplane1,Crebbp,Csrnp1,Ctgf,Ctnnb1,Dchs1,Derl2,Dvl2,Efemp1,Efnb1,Elavl1,Eya1,Fat4,Fermt2,Fgfr1,Fgfr2,Fgfrl1,Flna,Flnb,Fst,Fstl1,Fuz,Gli3,Gnai3,Gsk3b,Hif1a,Hs2st1,Hspg2,Igf2r,Impad1,Jarid2,Kat2a,Kmt2a,Lasp1,Lmna,Lmo4,Map3k4,Mef2c,Megf8,Mllt3,Mtf2,Nabp2,Nipbl,Nsd2,Nxn,Pcnt,Pcsk5,Pdgfra,Pds5a,Pds5b,Phc1,Phc2,Phf14…
MP:0000359	abnormal mast cell morphology	0.00767	0.0729	30	4421	Common	Apc,C3,Casp8,Ccr1,Cd44,Chst15,Ctnnb1,Enpp3,Fbn1,Gab2,Itgb7,Kitl,Lyn,Lyst,Map3k14,Mcl1,Mitf,Ndst2,Patz1,Pla2g4a,Rabgef1,Runx1,Selp,Spred1,Srgn,Stat5a,Stat6,Vegfa,Was,Wls
MP:0013877	abnormal ductus venosus valve morphology	0.00767	0.0729	30	4421	Common	4933434E20Rik,Adcy9,Anks6,Atg16l1,Atp11a,Capza2,Cog6,Col4a2,Coro1c,Crim1,Dmxl2,Fut8,H13,Hmgxb3,Morc2a,Npat,Nsun2,Prmt7,Pth1r,Rala,Rpgrip1l,Setd5,Sh3pxd2a,Smg9,Ssr2,Tcf7l2,Tent5c,Traf6,Trappc9,Zmynd11
MP:0011504	abnormal limb long bone morphology	0.00777	0.0737	209	4421	Common	2700049A03Rik,Acan,Acsl4,Acvr1,Adam17,Adgrf5,Agl,Akap11,Aktip,Alkbh1,Ank,Ankib1,Ankrd27,Ano6,Ap4e1,Apc,Arid5b,Ascc3,Atad2b,Atp2b1,Atp6v0d1,Atxn7l3,Bgn,Bmp4,Bmper,Bmpr1b,Bnip2,Cd44,Cdc42,Chd2,Chsy1,Chuk,Col12a1,Col1a2,Col4a3bp,Csf1,Ctgf,Ctnnb1,Ctsk,Cyp51,Ddr2,Dusp3,Dym,Ebf2,Egr1,Epdr1,Errfi1,Esr1,Evc2,Ext1,F2r,Fam20a,Fam20c,Fam49b,Fbf1,Fbn1,Fbxl22,Fermt2,Fgfr1,Fgfr2,Flnb,Frzb,Fstl1,Galc,Gas1,Ghr,G…
MP:0002932	abnormal joint morphology	0.00778	0.0738	150	4421	Common	4933434E20Rik,Acan,Acvr1,Ank,Ankrd11,Antxr1,Anxa1,Arid5b,Arpc1b,Ash1l,Atp11a,Atr,Axin1,Bmp4,Bmper,Bmpr1a,Bmpr1b,Bmpr2,Brd2,Capza2,Casp3,Cbx5,Cdc42,Chuk,Cir1,Cog6,Col1a2,Col4a2,Col4a3bp,Crebbp,Crim1,Csrnp1,Ctnnb1,Dhrs3,Ednra,Efnb1,Ehmt1,Enpp1,Errfi1,Eya1,Fas,Fgfr1,Fgfr2,Flnb,Fst,Fstl1,Fut8,Gli3,Gnai3,Gtf2ird1,Hif1a,Hs2st1,Hspg2,Hyal2,Ids,Ift140,Ift88,Il6st,Impad1,Itgb1bp1,Jun,Kat14,Kat6b,Kif3a,Kmt…
MP:0010498	abnormal interventricular septum muscular part morphology	0.0078	0.0739	45	4421	Common	4933434E20Rik,Adamts6,Atp11a,Baz1b,Bmpr2,Brd2,Capza2,Cc2d2a,Cmip,Cog6,Col4a2,Col4a3bp,Cplane1,Crim1,Cxcr4,Dhx35,Dnm2,Fbln1,Fgfr2,Fgfrl1,H13,Hectd1,Mapk7,Matr3,Megf8,Morc2a,Nos3,Otud7b,Pdgfrb,Rala,Rpgrip1l,Setd5,Sh3pxd2a,Slit2,Smad6,Smarca4,Smg9,Ssr2,Tcf7l2,Tent5c,Tgfbr3,Traf6,Trappc10,Trip11,Xpnpep1
MP:0001863	vascular inflammation	0.00783	0.0741	20	4421	Common	Adm,Chd2,Dicer1,Drosha,Ep300,Fas,Fbn1,Fcgr2b,Gpx7,Ifngr1,Il1rn,Klf15,Mtap,Ptpn22,Tgfb1,Timp3,Tk1,Tnip1,Trp53,Zfp36
MP:0002038	increased carcinoma incidence	0.00786	0.0743	121	4421	Common	Acox1,Ahr,Anxa7,Apc,Atad5,Atm,Atp2a2,Atp2c1,Bap1,Becn1,Braf,Brca2,Cbx7,Ccdc80,Ccndbp1,Cdc37,Cdkn1a,Cdkn1b,Cdkn2c,Cers2,Chuk,Cop1,Ctnnb1,Dkc1,Dok1,Dok3,Eif4e,Elavl1,Errfi1,Esr1,F3,Fah,Fbxo4,Flcn,Fyn,Gnai2,Gon4l,Gpx7,Hck,Hgf,Hip1,Htatip2,Iqgap2,Itgav,Lgals3,Lig1,Lmo7,Map3k7,Mapk14,Mcm4,Mcm9,Met,Mlh1,Mnt,Msh2,Msh3,Msh6,Nabp2,Nbn,Ncoa5,Ncstn,Ndrg2,Nf1,Nf2,Nfe2l1,Notch4,Nrbp1,Pcbp4,Pik3ca,Plau,Plk3,Pm…
MP:0005095	decreased T cell proliferation	0.00795	0.0751	103	4421	Common	Ahnak,Arhgef6,Atg3,Atg5,Bcl10,Bcl2l1,Bclaf1,Becn1,Bhlhe40,Cadm1,Casp8,Ccnd3,Ccr5,Cd2ap,Cd44,Cd48,Cd74,Cd83,Cd86,Cdk6,Cdkn1b,Chd4,Ciita,Clec4d,Cops8,Coro1a,Dbnl,Diaph1,Dicer1,Dock8,Erap1,Ets1,Foxo1,Fyb,Fyn,H2-DMa,Hcls1,Hr,Il1r1,Il21r,Il4ra,Il7r,Impdh1,Itgal,Itgam,Itgb2,Ksr1,Lbr,Lcp2,Map3k3,Map3k7,Map4k3,Mapk1,Mapk14,Mapk3,Mapk8,Mapk9,Mmp19,Mtor,Nckap1l,Nedd4,Nfat5,Nfkb1,Nfkbia,Nup98,Pbrm1,Pik3cg,P…
MP:0008662	abnormal interleukin-12 secretion	0.00798	0.0752	33	4421	Common	Bcl3,Birc3,Ccr1,Cd300lf,Cd36,Cebpb,Clic4,Dmd,Grn,H2-Ab1,Hif1a,Itgax,March1,Mavs,Mex3c,Msr1,Myd88,Nfkbiz,Peli1,Pink1,Ptpn2,Ptpn22,Siglec1,Slc15a4,Spp1,Stat3,Stat6,Tlr2,Tnfaip8l2,Tnip1,Traf6,Trafd1,Trib1
MP:0010879	decreased trabecular bone volume	0.00798	0.0752	33	4421	Common	Adipoq,Ank,Chsy1,Ciita,Ctnnb1,Evc2,Fam20c,Fermt2,Fig4,Gnptab,Gpr65,Igf1r,Inpp5d,Irak3,Kitl,Klf10,Mcph1,Notch2,P3h1,P3h4,Pdia3,Postn,Ppib,Prdm5,Ptpn2,Rassf2,Rnf146,Serpinf1,Sh3bp2,Slc39a14,Smad1,Tmem119,Twsg1
MP:0004599	abnormal vertebral arch morphology	0.008	0.0753	70	4421	Common	4933434E20Rik,Acp2,Apaf1,Arid5b,Arpc1b,Bmi1,Bmp4,Bmper,Brd2,Capza2,Cbx5,Chrd,Cir1,Cog6,Col12a1,Col4a2,Col4a3bp,Crim1,Epc2,Fgfr2,Fosl2,Fut8,Gli3,H13,Itgb1bp1,Jun,Kat14,Kif3a,Kmt2a,Lasp1,Lrig1,Lrp6,Med12,Morc2a,Myo9a,Npat,Nsun2,Otud7b,Pdgfc,Pip4k2b,Polb,Prrc2b,Psen1,Rab23,Rala,Rara,Rarg,Rpgrip1l,Rpl38,Rps7,Rundc1,Scube3,Serpinh1,Setd5,Sgpl1,Sh3pxd2a,Slc20a2,Slc25a30,Spopl,Ssr2,Suz12,Tbx18,Tcf7l2,Te…
MP:0011089	perinatal lethality, complete penetrance	0.00803	0.0755	131	4421	Common	Ackr3,Adam17,Adgra2,Apaf1,Apc,Arhgap35,Arhgap5,Arid1b,Arl8b,Atp7a,Birc6,Bmp4,Cdk5,Chrd,Chuk,Ciapin1,Col1a2,Crim1,Crk,Ctnnb1,Cxcr4,Dchs1,Dhrs3,Dicer1,Dnase2a,Edn1,Ednra,Egfr,Ep300,Erbb2,Evc2,Ezh2,Fbxw7,Fgfr2,Fkrp,Fstl1,Gata6,Gba,Gbe1,Gja1,Gli3,Hat1,Hectd1,Hoxa3,Hs2st1,Htt,Ift172,Itga6,Itgb4,Jag1,Jarid2,Jmjd6,Kat6a,Kdm6a,Kitl,Kmt2a,Kmt2b,Kmt2c,L3mbtl3,Larp7,Lgr4,Lmo4,Lox,Lrp1,Lrp4,Lrp6,Luzp1,Mafb,M…
MP:0003009	abnormal cytokine secretion	0.00808	0.0757	308	4421	Common	Abhd16a,Acp1,Adam17,Ahnak,Ahr,Anxa5,Apc,Arhgef2,Arhgef5,Arhgef6,Arrb2,Asah1,Ash1l,Atf2,Atf3,Atg16l1,Atg9a,Azi2,B2m,Bcl10,Bcl2l1,Bcl3,Bcl6,Bhlhe40,Birc2,Birc3,C3ar1,Cabin1,Cacnb3,Cadm1,Casp4,Cblb,Ccar2,Ccl2,Ccr1,Ccr5,Cd14,Cd1d1,Cd200r1,Cd274,Cd276,Cd300lf,Cd36,Cd44,Cd74,Cd84,Cd86,Cebpb,Ciita,Clec4d,Clic4,Cnpy3,Cops8,Coro1a,Ctss,Cul5,Cxcl16,Dbnl,Def6,Dennd1b,Dgka,Dhx58,Dlg1,Dmd,Drosha,Dusp1,Efs,Ehm…
MP:0004045	abnormal cell cycle checkpoint function	0.0081	0.0757	39	4421	Common	Atm,Brpf1,Bub3,Cacybp,Cdkn1a,Cops5,Cul4a,Gabpa,Hmgn1,Hus1,Ift122,Kmt5a,Lmna,Mafb,Mbd4,Mre11a,Nbn,Parp1,Parp2,Plk3,Ppp5c,Psme3,Ptpn6,Rae1,Rb1,Rnf168,Setd7,Sin3b,Sirt1,Smc5,Sptbn1,Syf2,Tpx2,Trp53,Trp53bp1,Trp53bp2,Tspyl2,Uimc1,Wee1
MP:0008048	abnormal memory T cell number	0.0081	0.0757	78	4421	Common	Acaca,Arhgef1,Atp5f1,Bap1,Bcl2l1,Bcl3,Casp8,Cd22,Cdkn1a,Clpp,Cog6,Coro1a,Ctr9,Dap,Dck,Dctn1,Ddhd1,Ddx58,Def6,Dennd4c,Diaph1,Dnmt3a,Elmo1,Ets1,Fam96a,Fas,Fbxo7,Gmds,Grk6,Hbs1l,Hibadh,Id3,Ikbkb,Il7r,Irf2,Irf5,Man2a1,Map3k7,Mkrn2,Mlec,Naga,Nfil3,Nfkb1,Nfkbia,Pik3r1,Ppp3cb,Prkch,Prkdc,Ptpn22,Ptprc,Rac2,Rras2,Rwdd1,Sarnp,Sept9,Sgms1,Slc1a5,Stk17b,Stk4,Tap1,Tap2,Tent5c,Tgfbr2,Tnfsf13b,Tnip1,Tpp2,Traf6,…
MP:0000075	absent neurocranium	0.00813	0.0757	10	4421	Common	Apaf1,Fermt2,Gli3,Hspg2,Ift140,Lama5,Morc2a,Ndst1,Scube1,Shroom3
MP:0000575	increased foot pad pigmentation	0.00813	0.0757	10	4421	Common	Egfr,Gnaq,Hdac1,Mdm4,Nf1,Rad50,Rpl27a,Rps19,Rps20,Trp53
MP:0001554	increased circulating free fatty acid level	0.00813	0.0757	52	4421	Common	Acaca,Acadl,Acot7,Adipoq,Aldh2,Ank2,Ankrd26,Apc,Bscl2,C3,Cavin1,Ccdc80,Ccl2,Cd36,Cpt1a,Dap,Ecscr,Ehmt1,Fabp3,Fto,Gfm1,Ghr,Hadh,Hadha,Hmgcr,Insr,Irs1,Itga8,Kdm3a,Lipa,Lipe,Mgat4a,Ncor1,Nfkb1,Nos3,Npy1r,Nus1,Osmr,Pde3b,Pdk4,Pparg,Ppil3,Prkci,Rpn2,Sar1b,Sdha,Sirt1,Stat5b,Tbc1d4,Tlr2,Txnip,Zeb1
MP:0004784	abnormal anterior cardinal vein morphology	0.00813	0.0757	10	4421	Common	Acvrl1,Dll4,Efnb2,Ephb4,Flt4,Gli3,Nr2f2,Pik3ca,Rbpj,Wasf2
MP:0010614	abnormal mitral valve cusp morphology	0.00813	0.0757	10	4421	Common	Bmpr1a,Cxcr4,Dchs1,Dock1,Efna1,Efnb2,Ehmt1,Nf1,Ntf3,Tns1
MP:0013022	increased Ly6C high monocyte number	0.00813	0.0757	10	4421	Common	4933434E20Rik,Acbd5,Agap1,Arhgef1,Clpp,Cog6,Galnt18,Gmds,Myo10,Tead3
MP:0001781	abnormal white adipose tissue amount	0.00824	0.0766	122	4421	Common	Acacb,Acot13,Aebp1,Alms1,Angptl2,Ankrd26,Ap1s2,Arhgap1,Arhgap5,Arid5b,Ash1l,Ate1,Atf3,Atm,Atr,B4galt1,Bag3,Bbs4,Braf,Bscl2,C1qtnf1,C3,Cav1,Cbl,Ccdc3,Cdc73,Cdk7,Cdkal1,Ces1d,Chd2,Cisd2,Cnot3,Col5a3,Crebbp,Cxcr4,Dgat2,Dhcr24,Dnajc15,Dock7,E2f3,Ebf1,Efemp1,Eif4ebp1,Eprs,Ercc1,Esr1,Fabp5,Fbn1,Fmo5,Gabbr1,Ghr,Gpd2,Gusb,Hsd11b1,Id2,Insr,Kdm3a,Lbr,Lipa,Lipe,Lmna,Lrrc8c,Lztfl1,Mapk8,Mark2,Mark3,Mbd5,Mcat…
MP:0003055	abnormal long bone epiphyseal plate morphology	0.00829	0.077	95	4421	Common	2700049A03Rik,Acvr1,Adam17,Arid5b,Asah1,Atf2,Cav1,Cdc42,Chsy1,Col27a1,Creb3l2,Crtap,Csf1,Csf1r,Ctgf,Ctnna1,Ctnnb1,Ctsk,Ctsl,Dusp6,Dym,Ebf1,Ebf2,Esr1,Evc2,Ext1,Fam20c,Fermt2,Fgfr2,Fgfrl1,Flnb,Fos,Fosl2,Ghr,Glg1,Gsn,Hif1a,Hspg2,Idh1,Ift80,Ift88,Igf1,Impad1,Irs1,Itga10,Itgb1,Kat6b,Kdm6b,Kif3a,Lbr,Lgals3,Ltbp3,Mapk14,Mbtps1,Mex3c,Mgp,Mitf,Mmp14,Ncdn,Nfatc1,Nfix,Nos3,Npr2,Npr3,Ntrk2,Ofd1,P3h1,Papss2,P…
MP:0000202	abnormal circulating alkaline phosphatase level	0.00833	0.0773	127	4421	Common	Abca6,Acox1,Adar,Adcy6,Afap1l2,Agl,Akap9,Aldh2,Amfr,Ank,Ap4e1,Aqp1,Arrb2,Atg7,Atp6v1h,Bap1,Bpnt1,Cfap36,Chd9,Chn1,Clpp,Creb3l1,Ctdsp1,Cystm1,Daam2,Dclk1,Degs1,Dynll1,Eif4g2,Elk4,Faf2,Fam20c,Fam69a,Fam96a,Fech,Fgfr1op,Fhl1,Galk2,Glmp,Gmds,Golga3,Gse1,Hbs1l,Hdac10,Ift88,Insr,Iqce,Itch,Jag1,Jak1,Kctd15,Ldha,Leprotl1,Lmna,Lmnb1,Lrig1,Lrrk1,Lztr1,Map3k7,Miga1,Mindy1,Mta3,Mtmr3,Mtss1,Myh10,Naga,Ncoa1,N…
MP:0000627	abnormal mammary gland morphology	0.00837	0.0775	113	4421	Common	Adam17,Aebp1,Ahr,Anpep,Apc,Arhgap5,Arnt,B4galt1,Bap1,Becn1,Bin1,Brca2,Cat,Cav1,Cbl,Cd44,Cdc37,Cdkn2c,Cebpb,Cebpd,Chuk,Crebrf,Csf1,Csf1r,Ctnna1,Ctnnb1,Ddr1,Dgat1,Dhx35,Dkc1,Egfr,Erbb2,Esr1,Ets2,Etv6,Fbxo4,Fgfr2,Fkbp4,Gja1,Gli3,Gpat4,Gpx7,Gsn,Hgf,Hif1a,Hr,Htatip2,Id2,Igfbp7,Il6st,Itgb1,Jak1,Jak2,Kdm5b,Lbh,Lrp4,Map3k14,Mcm4,Med1,Met,Mfge8,Mkl1,Mnt,Msh2,Mtdh,Nbn,Ncoa1,Ncoa2,Ncoa3,Ncoa6,Neo1,Net1,Nf2,…
MP:0013554	abnormal apocrine gland morphology	0.00837	0.0775	113	4421	Common	Adam17,Aebp1,Ahr,Anpep,Apc,Arhgap5,Arnt,B4galt1,Bap1,Becn1,Bin1,Brca2,Cat,Cav1,Cbl,Cd44,Cdc37,Cdkn2c,Cebpb,Cebpd,Chuk,Crebrf,Csf1,Csf1r,Ctnna1,Ctnnb1,Ddr1,Dgat1,Dhx35,Dkc1,Egfr,Erbb2,Esr1,Ets2,Etv6,Fbxo4,Fgfr2,Fkbp4,Gja1,Gli3,Gpat4,Gpx7,Gsn,Hgf,Hif1a,Hr,Htatip2,Id2,Igfbp7,Il6st,Itgb1,Jak1,Jak2,Kdm5b,Lbh,Lrp4,Map3k14,Mcm4,Med1,Met,Mfge8,Mkl1,Mnt,Msh2,Mtdh,Nbn,Ncoa1,Ncoa2,Ncoa3,Ncoa6,Neo1,Net1,Nf2,…
MP:0004508	abnormal pectoral girdle bone morphology	0.00851	0.0787	118	4421	Common	2700049A03Rik,Adamts2,Adamts6,Alkbh1,Apc,Arid5b,Ash1l,Atp7a,Bmp4,Bmp6,Bmper,Bmpr1b,Bmpr2,Brca2,Cdc42,Cebpb,Chuk,Col27a1,Cplane1,Crebbp,Csrnp1,Ctgf,Ctnnb1,Dchs1,Derl2,Dvl2,Efemp1,Efnb1,Elavl1,Eya1,Fat4,Fermt2,Fgfr1,Fgfr2,Fgfrl1,Fig4,Flna,Flnb,Fst,Fstl1,Fuz,Gli3,Gnai3,Gsk3b,Hif1a,Hoxa3,Hs2st1,Hspg2,Igf2r,Impad1,Jarid2,Kat2a,Kmt2a,Lasp1,Lmna,Lmo4,Lrrk1,Map3k4,Mef2c,Megf8,Mllt3,Morc2a,Mtf2,Nabp2,Nipb…
MP:0009661	abnormal pregnancy	0.00855	0.0787	87	4421	Common	Adamts1,Adm,Anpep,Antxr2,Apc,Arnt,Ash1l,Axin1,B3galnt1,B4galt1,Btf3,C3,Calcrl,Cav1,Cdc73,Chuk,Clock,Cops2,Csf1,Csf1r,Cxxc1,Ddr1,Dgat1,Dicer1,Eif3h,Esr1,Fgfr2,Fkbp4,Fzd4,Gadd45a,Ghr,Gja1,Gsn,Hspa5,Id2,Igfbp7,Il11ra1,Il6st,Itgb1,Itgb3,Jak2,Kalrn,Kpna1,Kpna6,Lbh,Mcl1,Mga,Mrc1,Ncoa1,Ncoa2,Ncoa6,Nos3,Notch2,Notch3,Nr2f2,Nr3c1,Parl,Pcyt1a,Per1,Per2,Pla2g4a,Pparg,Prmt1,Psmc3,Psmc4,Pten,Ptgfr,Ptgs1,Ptgs2…
MP:0014141	abnormal mesoderm morphology	0.00855	0.0787	67	4421	Common	Acvr1,Acvr1b,Adam10,Adamts9,Arid1a,Armc5,Axin1,Bmp4,Bmpr1a,Bmpr2,Bptf,Chd8,Chrd,Cops3,Ctnnb1,Dact1,Dag1,Dhx9,Drap1,Ecsit,Eif4g2,Epha2,Exoc4,Ext1,Ext2,Fgfr1,Fn1,G6pdx,Gclc,Itga5,Kat2a,Kmt2a,Lrp6,Mesd,Metap2,Mib1,Nckap1,Nf2,Nfe2l1,Nsd1,Nup133,Pik3c3,Pkn2,Pknox1,Plpp3,Pofut2,Poglut1,Ppp1r8,Ppp2ca,Prickle1,Prkar1a,Ptpn11,Rac1,Slc31a1,Smad2,Smad4,Srf,Stat3,Supt20,Tcf7l1,Tjp2,Trim28,Tsg101,Vps41,Wls,Wn…
MP:0003763	abnormal thymus physiology	0.00857	0.0787	56	4421	Common	Atr,Birc6,Bmi1,Braf,Casp9,Cbx4,Cdk6,Cdkn1a,Cflar,Cops6,Coro1a,Dicer1,Elavl1,Esr1,Ets1,Fas,Foxo1,Fyn,Hr,Ikzf1,Il21r,Il6st,Il7r,Ing1,Kifap3,Lama2,Lcp2,Lig1,Map3k7,Mdm4,Nabp2,Ndrg1,Nfatc2,Nfkb2,Noc2l,Nr3c1,Nsmce2,Orai1,Pnp,Prkdc,Ptpn2,Ptpn22,Ptprc,Ripk1,Runx1,Slc39a10,Smad4,Sox13,Stat3,Tle4,Tmem109,Trp53,Twsg1,Usp4,Vdac2,Was
MP:0002724	enhanced wound healing	0.00858	0.0787	18	4421	Common	Adam9,Coro7,Dlc1,Flii,Il1r1,Itga3,Itgb3,Jdp2,Nos2,Parp1,Prkar1a,Serpine1,Smad2,Sod2,Sparc,Tgfbr1,Thbs2,Trp53
MP:0003710	abnormal physiological neovascularization	0.00858	0.0787	18	4421	Common	Atp2a2,B4galt1,Ccl2,Cd44,Cd47,Clic4,Cxcl12,Ddah1,Elavl1,Epas1,Flt1,Itgb3,Mfge8,Nos2,Ptk2b,Spp1,Thbs1,Xbp1
MP:0008563	decreased interferon-alpha secretion	0.00858	0.0787	18	4421	Common	Azi2,Dhx58,Ifih1,Ifnar1,Ifnar2,Irak1,Irak2,Irak4,Irf1,Irf5,Irf7,Irf9,Map3k8,Mapk14,Mavs,Myd88,Peli1,Unc93b1
MP:0009415	skeletal muscle degeneration	0.00858	0.0787	18	4421	Common	Acvr1,Bag3,Cfl2,Des,Dmd,Dysf,Fkrp,Flnc,Hmbs,Large1,Lmna,Mtor,Myof,Pfkm,Pik3r4,Prnp,Sgcb,Zfp106
MP:0000692	small spleen	0.00878	0.0805	143	4421	Common	Abcc10,Abcc4,Adh5,Ahr,Aif1,Akap13,Ap1b1,Arhgap1,Arid5b,Asb1,Atg3,Atl2,Atm,Atmin,Atr,Bag3,Bcl6,Blnk,Bmi1,Braf,Brca2,Btk,Cacybp,Casp8,Cd2ap,Cdc73,Cdk6,Cdkn1b,Cep290,Chd4,Coro1a,Csf1,Ctc1,Cul4a,Cxcr4,Ddost,Dnajc11,Dock2,Efemp1,Elavl1,Ercc1,Ercc5,Ets1,Ezh1,Fas,Fig4,Fnip1,Foxo1,Fubp1,Fxr1,Ghr,Glb1,Gon4l,Grb14,Gstz1,Hax1,Hectd3,Htra2,Ifngr1,Igfbp2,Il7r,Invs,Jarid2,Kat6a,Kdm1a,Klhl6,Kmt2e,Lbr,Lmna,Lyn,M…
MP:0005605	increased bone mass	0.00883	0.0809	46	4421	Common	Adipoq,Atp6v0d2,Bmpr1a,Cd14,Csf1,Csf1r,Ctnnb1,Ctsk,Fos,Fosl2,Gab2,Gsk3b,Gsn,Hivep3,Htr1b,Itgb3,Jdp2,Khdrbs1,Lrrk1,Ltbp3,Mitf,Nbr1,Nfatc1,Nfkb2,Nos2,Ostm1,Per1,Plekhm1,Plekho1,Plxna1,Pparg,Sh3bp2,Smurf1,Snx10,Sost,Spi1,Spon1,Src,Stat1,Thra,Tlr4,Tmem64,Tnfrsf11a,Traf6,Trp53,Tyrobp
MP:0001573	abnormal circulating alanine transaminase level	0.00885	0.0809	105	4421	Common	Abhd5,Acox1,Adar,Agl,Amfr,Asl,Atg7,B4gat1,Bcr,Bicd1,Boc,Bpnt1,C3,Cd84,Cdc26,Cluh,Cog2,Dbn1,Degs1,Dnm1l,Dusp1,Egr1,Eif4e3,Esco1,Fbxl5,Fbxo7,Fkbp9,Fkrp,Fth1,Fto,Gclc,Gclm,Glmp,Hadha,Hdac3,Hgsnat,Hmgcr,Hmox1,Irf1,Jag1,Kbtbd2,Kif21b,Kmt5b,Kpna1,Lamp2,Ldha,Lgals3,Lrig1,Ltbp1,Map3k7,Mcat,Mpv17,Mta2,Myd88,Ncoa5,Nf1,Nfe2l1,Nfe2l2,Nos2,Notch2,Notch3,Nr1h3,Nr2c2,Pafah2,Pex3,Phyh,Pik3cg,Pla2g16,Plau,Por,Ppa…
MP:0002014	increased papilloma incidence	0.00887	0.0809	28	4421	Common	Atf2,Atp2a2,Atp2c1,Braf,Cd34,Cdk11b,Chuk,Cyld,Egr1,Errfi1,Fgfr2,Fos,Kitl,Klf10,Odc1,Pdcd4,Ppard,Prkca,Prkch,Pten,Ptgs2,Rint1,Smad4,Stag1,Tnfrsf1a,Tnfrsf1b,Trp53,Ttc7
MP:0004269	abnormal optic cup morphology	0.00887	0.0809	28	4421	Common	Arid1a,Atp11a,Brd1,Brd2,Chd7,Cir1,Col4a2,Col4a3bp,Crim1,Dhx35,Gli3,H13,Hmgxb3,Mitf,Morc2a,Nsun2,Phc1,Polb,Prrc2b,Rab23,Rpgrip1l,Rpl24,Setd5,Sh3pxd2a,Smg9,Smo,Ssr2,Traf6
MP:0006337	abnormal first pharyngeal arch morphology	0.00887	0.0809	28	4421	Common	Adam10,Akap13,Aph1a,Arid1a,Ccm2,Dicer1,Disp1,Edn1,Ednra,Efnb2,Foxo1,Gli3,Hand2,Itgb1,Kat7,Kcnh2,Mapk7,Med12,Mthfd1l,Ncstn,Nrp1,Pcsk6,Rasa1,Rere,Smo,Tcof1,Twsg1,Zeb2
MP:0005094	abnormal T cell proliferation	0.00898	0.0819	159	4421	Common	Ahnak,Appl1,Arhgef1,Arhgef12,Arhgef6,Atg3,Atg5,Bcl10,Bcl2l1,Bclaf1,Becn1,Bhlhe40,Birc2,Birc3,Cadm1,Casp8,Cblb,Ccnd3,Ccr5,Cd274,Cd276,Cd2ap,Cd44,Cd48,Cd59a,Cd74,Cd81,Cd83,Cd86,Cdk6,Cdkn1a,Cdkn1b,Chd4,Chst3,Ciita,Clec4d,Cops8,Coro1a,Dbnl,Dck,Diaph1,Dicer1,Dock8,Dok1,Elf4,Erap1,Ets1,Fas,Foxo1,Foxo3,Fyb,Fyn,Gadd45a,Gnai2,H2-DMa,Hcls1,Hnrnpl,Hr,Ikzf1,Il1r1,Il1rn,Il21r,Il4ra,Il7r,Impdh1,Irf1,Itgal,Itga…
MP:0005432	abnormal pro-B cell morphology	0.00903	0.0822	53	4421	Common	Arid5b,Bad,Blnk,Btk,Cd72,Cxcl12,Cxcr4,Cyld,Dck,Dicer1,Dnmt1,Ebf1,Ell2,Ern1,Ets1,Etv6,Ezh1,Ezh2,Fbxo7,Fnip1,Gon4l,Hax1,Htra2,Ikzf1,Inpp5d,Kat6a,Kmt2a,Kmt2e,Mcl1,Nfkbia,Nlk,Noc2l,Pbx1,Pgm3,Pik3r1,Pknox1,Plcg2,Ppp2r3c,Rad50,Runx1,Sh3bp2,Slc39a10,Spi1,Srsf3,Syk,Tcf12,Tcf4,Tet2,Tle4,Tnfrsf11b,Trp53,Twsg1,Vamp3
MP:0000547	short limbs	0.00913	0.0829	64	4421	Common	2700049A03Rik,Acan,Ano6,Atf2,Cdc42,Chsy1,Chuk,Col27a1,Creb3l2,Csf1,Csf1r,Ctnnb1,Cyp51,Ddr2,Elavl1,Evc2,Fermt2,Flnb,Fos,Gas1,Gli3,Gnpat,Gusb,Hand2,Hif1a,Hspg2,Ick,Ift172,Ift88,Il6st,Impad1,Kdm6b,Kif3a,Lrp6,Mef2c,Mia3,Mmp14,Nf1,Nos3,Npr2,Nsdhl,Pds5b,Pkdcc,Ppib,Prickle1,Prrx1,Pth1r,Rgs10,Ryk,Sc5d,Smo,Sox9,Sumf1,Thra,Thrb,Tnfrsf11a,Trip11,Vcan,Wdr11,Wls,Wnt5a,Xylt1,Zbtb16,Zeb1
MP:0000704	abnormal thymus development	0.0092	0.0829	16	4421	Common	Cbx4,Crkl,Dicer1,Ece1,Fgfr2,Hand2,Ikzf1,Il13ra1,Jmjd6,Kat6a,Ptpn6,Rc3h1,Rpl22,Srsf3,Twsg1,Zeb1
MP:0006093	arteriovenous malformation	0.0092	0.0829	16	4421	Common	4933434E20Rik,Acvrl1,Col4a2,Dll4,Eng,Fut8,Mgp,Myo9a,Notch4,Nr2f2,Prrc2b,Rbpj,Sh3pxd2a,Slc20a2,Slc25a20,Tmem100
MP:0006355	abnormal sixth pharyngeal arch artery morphology	0.0092	0.0829	16	4421	Common	Acvr1,Arid1a,Chd7,Ece1,Ednra,Mkl2,Nrp1,Plxnd1,Prrc2b,Rpgrip1l,Sh3pxd2a,Smg9,Smo,Tbx2,Traf6,Vegfa
MP:0008173	increased follicular B cell number	0.0092	0.0829	16	4421	Common	Adam10,Cog6,Cyld,Ell2,Fas,Hax1,Irf8,Nedd9,Parp14,Prkcd,Ptpn22,Rbpj,Tnfaip3,Traf3,Traf3ip2,Was
MP:0008668	abnormal interleukin-12b secretion	0.0092	0.0829	16	4421	Common	Arrb2,Ccl2,Cd200r1,Ifngr1,Irak3,Irak4,Lgals3,Lgmn,Map3k8,Mavs,Myd88,Nfil3,Tlr2,Tnip1,Unc93b1,Zc3h12a
MP:0011187	abnormal parietal endoderm morphology	0.0092	0.0829	16	4421	Common	Abi1,Col4a1,Ctdnep1,Dad1,Dag1,Dhx9,Htt,Lamb1,Mesd,Pofut2,Pomt1,Pomt2,Slc31a1,Smad4,Tsg101,Ugcg
MP:0011926	abnormal cardiac valve physiology	0.0092	0.0829	16	4421	Common	Adam17,Bmpr1a,Cplane1,Ctsl,Egfr,Epha3,Fgfrl1,Gja1,Jag1,Klf3,Lox,Lrp1,Nfatc1,Pcnt,Plce1,Sema3c
MP:0020180	abnormal IgM level	0.00922	0.0829	115	4421	Common	Abcb1a,Arhgef1,Ash1l,B2m,Bax,Bcl10,Bcl3,Bcl6,Birc3,Blnk,Bmi1,Btk,Cd22,Cd36,Cd72,Cd74,Cd81,Cd83,Ciita,Ctss,Cxcr4,Cyld,Dapp1,Dbnl,Dkk3,Dock8,Dok1,Ebf1,Ell2,Fas,Fcgr2b,Fnip1,Fyn,Gadd45a,Ggta1,Gnai2,Grb2,H2-Ab1,Hdac6,Hr,Huwe1,Ifih1,Ifnar1,Ikbkb,Il6st,Inpp5d,Itgb2,Jak1,Kmt2d,Lama2,Lama5,Ly86,Lyn,Man2a1,Map3k14,Map4k3,Mark2,Mavs,Mtor,Nedd4,Nfatc1,Nfe2l2,Nfkb1,Nfkb2,Nfkbie,Nipal3,Notch2,Npy1r,Pik3ap1,Pi…
MP:0006315	abnormal urine protein level	0.00923	0.0829	84	4421	Common	Ace,Adipoq,Alms1,Ampd2,Atp6ap2,Bax,Bloc1s5,Bmp4,C3,Ccni,Ccr1,Cd1d1,Cd2ap,Cd55,Cd59a,Cdkn1a,Cfh,Cfl1,Col4a1,Coro2b,Crim1,Dab2,Ddr1,Dicer1,Ercc1,Esr1,F2r,Fas,Fat1,Fcgr2b,Gadd45a,Glis2,Gne,H2-Ab1,Hps4,Itga3,Itgb1,Kirrel,Lama5,Lamb2,Ldb1,Lgmn,Lrrk2,Lyn,Magi2,Man2a1,Mark2,Mgat2,Mocs2,Mpv17,Mta2,Myh9,Myo1e,Nfe2l2,Nos2,Nos3,P4htm,Pdgfb,Pik3c2a,Pparg,Prkci,Prkdc,Ptgs2,Ptprc,Rac1,Rrm2b,Scarb2,Scube3,Serpi…
MP:0002943	abnormal lactate dehydrogenase level	0.00928	0.0829	31	4421	Common	Adar,Amfr,Bbs4,Bcr,Cdipt,Cog2,Eif4e3,Elk4,Epc1,Epc2,Fam234b,Fbxl5,Fto,Hmgb1,Hyal2,Ift20,Jag1,Ldha,Lyz2,Miga2,Nf1,Nfe2l2,Pfkm,Prdx1,Ptgs2,Rab27a,Sptbn1,Tysnd1,Uaca,Unc93b1,Zfp36
MP:0005642	decreased mean corpuscular hemoglobin concentration	0.00928	0.0829	31	4421	Common	Abcb10,Appl2,Atp6v0d1,Chn1,Cp,Crlf3,Eif2b5,Eps15,Exoc6,Fbxo9,Gpi1,Ireb2,Kitl,Lgmn,Myo1c,Nfkb1,Pacsin2,Ppp1r15b,Ppp5c,Prkab1,Prkag1,Rnf10,Slc11a2,Sparc,Steap3,Tent5c,Tpi1,Trf,Trnt1,Usp12,Zfp275
MP:0009640	abnormal renal tubule epithelium morphology	0.00928	0.0829	31	4421	Common	Alms1,Arhgap35,Atp6ap2,Bbs4,Cc2d2a,Cep290,Cplane1,Ctnnd1,Dcn,Ddr1,Dicer1,Fan1,Flcn,Gcnt2,Gstz1,Ift88,Itgb1,Lamb2,Lin7c,Man2b1,Naglu,Nfat5,Nos3,Nphp3,Prdx6,Rrm2b,Sod2,Tgfb2,Tlr4,Tmem67,Wwtr1
MP:0020137	decreased bone mineralization	0.00928	0.0829	31	4421	Common	Acp2,Ano6,Atp2b1,Atp6v1h,Cebpb,Chuk,Col12a1,Creb3l1,Csf1,Csf1r,Ctnnb1,Ebf1,Eif2ak3,Esr1,Fam20c,Flnb,Fosl2,Hspg2,Ifngr1,Igf1r,Itgb2,Kdm6b,Lmna,Naca,Notch2,Pex2,Pex7,Plekhm1,Rnf146,Slc39a14,Wdr11
MP:0010666	abnormal vitelline vein morphology	0.00929	0.0829	23	4421	Common	4933434E20Rik,Atg16l1,Atp11a,Cmip,Cog6,Coro1c,Crim1,H13,Mkl2,Morc2a,Nxn,Polb,Prmt7,Prrc2b,Rala,Rpgrip1l,Setd5,Sh3pxd2a,Slc25a20,Traf6,Vegfa,Xpnpep1,Zmynd11
MP:0008770	decreased survivor rate	0.00933	0.0829	106	4421	Common	Ace,Ackr3,Adam17,Aebp1,Alkbh1,Apaf1,Ash1l,Atg7,B3gnt5,Baiap2,Bmpr1a,Brca2,Cap2,Chd2,Clic4,Col5a2,Cpeb4,Creb1,Crim1,Daam1,Dact1,Ddr2,Ddx58,Ebp,Egln1,Ehmt1,Eif3c,F2r,Fbxw8,Flnb,Fut8,Gapdh,Gata2,Git1,Glg1,Gnptab,Hdac2,Herc1,Hyal2,Id2,Ifih1,Igf1,Igf2r,Ikbkap,Itsn1,Kcmf1,Kitl,Klf3,Lgr4,Lmna,Lpin1,Magoh,Mcph1,Mitf,Msh2,Mta2,Mut,Myh10,Myo10,Ndn,Ndrg2,Nf2,Nfatc3,Nos2,Nos3,Nov,Npr2,Nr3c1,Ntan1,Ntf3,Orai1,…
MP:0000858	altered metastatic potential	0.00934	0.0829	40	4421	Common	Anxa1,Apc,Atf3,Braf,Ccdc80,Ccr5,Cdkn1a,Cst3,Epha2,Fbln5,Fos,Hgf,Hmgn1,Htatip2,Id1,Ifngr1,Itgal,Jam3,Lyst,Mcm3,Mgat5,Nbeal2,Notch4,Npr1,Ntn4,Plau,Pld1,Pten,Rb1,Rhoj,Rnf19b,Runx1,Stat6,Tmem219,Tom1l2,Tpx2,Trp53,Tsc2,Vegfa,Vegfd
MP:0005059	lysosomal protein accumulation	0.00934	0.0829	12	4421	Common	Atp13a2,Bloc1s5,C9orf72,Clcn6,Ctsd,Galns,Gnptab,Ids,Lgmn,Lyst,M6pr,Sc5d
MP:0009222	increased uterus tumor incidence	0.00934	0.0829	12	4421	Common	Cdc73,Cop1,Errfi1,Fbxo4,Htatip2,Mlh1,Msh2,Msh6,Pten,Rint1,Trp53,Tsc2
MP:0009295	decreased interscapular fat pad weight	0.00934	0.0829	12	4421	Common	Bscl2,Ehmt1,Id2,Lpin1,Lrp1,Med13,Npr3,Ppard,Pparg,Ptpn1,Rbl1,Rps6kb1
MP:0010493	abnormal atrium myocardium morphology	0.00934	0.0829	12	4421	Common	4933434E20Rik,Atp11a,Brd2,Col4a3bp,Dmd,Erbb2,Gnaq,Morc2a,Ntf3,Pikfyve,Setd5,Sh3pxd2a
MP:0010743	delayed suture closure	0.00934	0.0829	12	4421	Common	Alkbh1,Fam20c,Fgfr2,Fgfrl1,Foxn3,Ibsp,Kat6b,Lrp6,Mmp14,Sik3,Thra,Wls
MP:0010909	pulmonary alveolar hemorrhage	0.00934	0.0829	12	4421	Common	Abca3,Atox1,Braf,Chd2,Epha3,Hspa5,Man1a2,Ntf3,Plat,Prdx6,Ptger4,Thbs1
MP:0013629	abnormal bone trabecular spacing	0.00934	0.0829	12	4421	Common	Ciita,F2r,Ibsp,Notch2,Plekhm1,Ppib,Rnf146,Slc39a14,Smad1,Snx10,Socs2,Spon1
MP:0011367	abnormal kidney apoptosis	0.00946	0.0839	37	4421	Common	Alms1,Atp6ap2,Bag6,C1qa,Ccni,Cd59a,Crim1,Ctnnd1,Dapk1,Dcn,Dicer1,Fas,Fat4,Fgfrl1,Fryl,Glis2,Gstz1,Hmox1,Ift140,Itga1,Itgb1,Kif3a,Lama5,Lgr4,Lin7c,Lrrk2,Mafb,Nfat5,Nos3,Notch2,Osr1,Parp1,Pkd2,Polb,Pparg,Rrm2b,Thbs1
MP:0000166	abnormal chondrocyte morphology	0.00949	0.084	50	4421	Common	Acan,Ank,Apc,Atf2,Bmpr1b,Chsy1,Chuk,Col27a1,Creb3l2,Ctnnb1,Derl2,Disp1,Dym,Enpp1,Errfi1,Fam20c,Fermt2,Fgfr2,Flnb,Fosl2,Ghr,Gnptab,Hspg2,Hyal1,Ift88,Igf1,Irs1,Itgb1,Kdm6b,Kif3a,Lrp4,Mia3,Mmp14,Ncdn,Nov,Npr2,Papss2,Pbx1,Pkdcc,Prg4,Prickle1,Pten,Pth1r,Serpinh1,Sik3,Slc39a14,Spg20,Trip11,Trps1,Xylt1
MP:0001222	epidermal hyperplasia	0.00949	0.084	50	4421	Common	Atf2,Cask,Casp8,Cav1,Cd109,Cdc42,Cebpb,Chuk,Ctsl,Cyld,Dgat1,Dicer1,Dkc1,Drosha,E4f1,Ercc3,Errfi1,Fbxo11,Fgfr2,Fos,Fyn,Gk5,Gpx8,Gtf2ird1,Hdac1,Hr,Itgb1,Itgb2,Lbr,Lmna,Lrig1,Mapk9,Nfkbiz,Plcl1,Ppard,Prkca,Prkch,Pten,Ptgs2,Rabgef1,Rb1,Sav1,Sptlc2,Taf4,Terf1,Ttc7,Vegfa,Wdr1,Xpc,Zdhhc13
MP:0003416	premature bone ossification	0.00954	0.0841	14	4421	Common	Cav1,Ctnnb1,Fgfr1,Fgfr2,Igf2r,Ltbp3,Mef2c,Nsdhl,Prdm16,Sox9,Tgfbr1,Thbs3,Thrb,Xylt1
MP:0004188	delayed embryo turning	0.00954	0.0841	14	4421	Common	Arnt,Chd7,Dph3,Ift122,Lmo2,Mbd4,Mpi,Numb,Rapgef2,Rev3l,Smg1,Tcof1,Wasl,Wdr35
MP:0004463	basisphenoid bone foramen	0.00954	0.0841	14	4421	Common	Bmper,Brd2,Cdon,Coro1c,Dhx35,Gli3,Hmgxb3,Morc2a,Nsun2,Pkdcc,Sh3pxd2a,Smg9,Ssr2,Tcf7l2
MP:0009412	skeletal muscle fiber degeneration	0.00954	0.0841	14	4421	Common	Bag3,Cfl2,Des,Dmd,Dysf,Fkrp,Flnc,Large1,Mtor,Myof,Pfkm,Prnp,Sgcb,Zfp106
MP:0002115	abnormal limb bone morphology	0.00969	0.0854	217	4421	Common	2700049A03Rik,Acan,Acsl4,Acvr1,Adam17,Adgrf5,Agl,Akap11,Aktip,Alkbh1,Ank,Ankib1,Ankrd27,Ano6,Ap4e1,Apc,Arid5b,Ascc3,Atad2b,Atp2b1,Atp6v0d1,Atp7a,Atxn7l3,Bgn,Bmp4,Bmper,Bmpr1b,Bnip2,Cd44,Cdc42,Chd2,Chsy1,Chuk,Col12a1,Col1a2,Col4a3bp,Csf1,Ctgf,Ctnnb1,Ctsk,Cyp51,Ddr2,Dusp3,Dym,Ebf2,Efnb1,Egr1,Epdr1,Errfi1,Esr1,Evc2,Ext1,F2r,Fam20a,Fam20c,Fam49b,Fbf1,Fbn1,Fbxl22,Fermt2,Fgfr1,Fgfr2,Flnb,Frzb,Fstl1,Gal…
MP:0002795	dilated cardiomyopathy	0.00973	0.0856	61	4421	Common	Abca5,Acadvl,Aifm1,Bag3,Camk2d,Camta2,Cap2,Cast,Cav1,Cenpf,Clcn3,Ctnna1,Ctsl,Dag1,Des,Dicer1,Dnaja3,Egln1,Erbb2,Gas2l3,Gja5,Gnaq,Hccs,Hexim1,Itgb1,Large1,Lmna,Lrp1,Mcoln1,Mdm4,Med1,Mef2c,Mtor,Myh10,Myh11,Myocd,Nexn,Nr2f2,Pdlim3,Pdlim5,Phc1,Plrg1,Ptger4,Ptpn11,Rab1a,Raf1,Rce1,Sgcd,Slc6a6,Sod2,Srf,Tfam,Tgfbr1,Tgfbr2,Timp3,Tmod1,Tpm1,Vcl,Yap1,Yme1l1,Zmpste24
MP:0010122	abnormal bone mineral content	0.00986	0.0866	167	4421	Common	Acsl5,Adam17,Adar,Adgrd1,Adgrf5,Afap1l2,Ahcyl1,Aktip,Ank,Ap4e1,Aqp1,Arrdc1,Aspa,Atp8b2,Bbx,Bgn,Bhlhe40,Boc,Btrc,Bzw2,Cast,Cd14,Cdk5rap2,Cdk7,Cers5,Chd2,Chn1,Chsy1,Cln6,Clpp,Col1a2,Coq2,Ctgf,Ctsk,Cybc1,Ddr2,Ddx10,Degs1,Dgcr2,Dmxl2,Dolk,Elmod2,Enpp1,Erlin2,Esr1,Evc2,Fam20c,Flnb,Fnbp1l,Foxj3,Frzb,Ghr,Gja1,Gnao1,Gnptab,Gpr65,Hace1,Hbs1l,Hdac6,Hdac8,Hectd3,Herc4,Id1,Il6st,Iqce,Irs1,Itch,Kat14,Kitl,Klf…
MP:0005606	increased bleeding time	0.00992	0.0867	47	4421	Common	Ano6,Ap3b1,Bloc1s5,Bloc1s6,Cdc42,Clic1,Dock7,Emilin1,Entpd1,Fads2,Fbxl5,Galnt1,Gna13,Gnaq,Gsn,Gucy1b1,Hps1,Hps3,Hps4,Hps5,Inpp5d,Itgb3,Lnpk,Lyst,Mgat4b,Myh9,Nbeal2,Papss2,Pdia4,Ptgs1,Rab27a,Rabggta,Ranbp10,Rap1b,Scube1,Selp,St3gal2,St3gal4,Stim1,Tbxas1,Thbs2,Tln1,Txnip,Vps33a,Vps33b,Vwf,Wdr1
MP:0006254	thin cerebral cortex	0.00992	0.0867	65	4421	Common	Aifm1,Arfgef1,Arhgap5,Arid1b,Asns,Aspm,B4galt2,Bbs2,Bbs4,Bbs7,Bdnf,Bicd2,Braf,Cdc42,Cdk5rap2,Cdon,Cep63,Ddb1,Egfr,Ei24,Ext1,Gli3,Gnb1,Huwe1,Jam3,Lamc1,Magoh,Manf,Mapk1,Marcksl1,Mcph1,Mpp5,Myh10,Ncstn,Nedd4,Nf1,Nrd1,Ophn1,Pcnt,Pdcd6ip,Pex13,Polb,Pomgnt1,Ppt1,Prmt5,Psmc1,Ptbp2,Rbm8a,Rdh10,Rheb,Rhot1,Rps7,Slx4,Smarcb1,Smarcc2,Smc2,Spen,Ssb,Tubb2b,Tubb5,Wasl,Wdfy3,Xrcc4,Zbtb18,Zfp335
MP:0009356	decreased liver triglyceride level	0.00992	0.0867	47	4421	Common	Abhd5,Acaca,Acot13,Adipor2,C1qtnf1,Cav1,Cbl,Ccdc3,Ccny,Cd36,Cdkal1,Ces1d,Clk2,Crbn,Dgat1,Fosl2,Foxo1,Ghr,Gpam,Hif1an,Lipe,Lrp1,Lrp6,Mapk8,Mapk8ip1,Mbtps1,Mgll,Nr1d1,Nr2c2,Pank1,Pla2g16,Plin2,Ppard,Prkab1,Prkcd,Ptpn11,Rptor,Scap,Scd2,Scp2,Serpine1,Sik3,Socs2,Srebf2,Srsf3,Ssfa2,Tlr4
MP:0000262	poor arterial differentiation	0.01	0.0867	7	4421	Common	Acvrl1,Cxcl12,Cxcr4,Mib1,Notch3,S1pr1,Tmem100
MP:0002399	abnormal pluripotent precursor cell morphology	0.01	0.0867	7	4421	Common	Arid1a,Cstf2,Hsd17b12,Med28,Mga,Pknox1,Usp21
MP:0003622	ischuria	0.01	0.0867	7	4421	Common	Id2,Mocs2,Myh11,Mylk,Naglu,Neu1,Ppp1r12a
MP:0004202	pulmonary hyperplasia	0.01	0.0867	7	4421	Common	Fstl1,Hck,Igf2r,Itga3,Nr3c1,Pdgfra,Pten
MP:0008542	enlarged cervical lymph nodes	0.01	0.0867	7	4421	Common	C9orf72,Cdkn1a,Ikzf1,Il6st,Polb,Prkch,Traf3ip2
MP:0009556	abnormal platelet ADP level	0.01	0.0867	7	4421	Common	Ap3b1,Bloc1s6,Dock7,Hps1,Hps5,Lyst,Rab27a
MP:0009557	decreased platelet ADP level	0.01	0.0867	7	4421	Common	Ap3b1,Bloc1s6,Dock7,Hps1,Hps5,Lyst,Rab27a
MP:0010384	increased renal carcinoma incidence	0.01	0.0867	7	4421	Common	Cdkn2c,Dkc1,Flcn,Nf2,Pten,Sptbn1,Tsc2
MP:0010784	abnormal forestomach morphology	0.01	0.0867	7	4421	Common	Adam10,Bmpr1a,Fos,Kitl,Nr2f2,Tes,Ttc7
MP:0011572	abnormal aorta bulb morphology	0.01	0.0867	7	4421	Common	Fbn1,Lox,Lrp1,Smarca4,Tgfb2,Tgfbr1,Tgfbr2
MP:0011642	abnormal bone collagen fibril morphology	0.01	0.0867	7	4421	Common	Bgn,Fkbp10,P3h1,P3h4,Prdm5,Smad4,Suco
MP:0011743	abnormal Golgi apparatus morphology	0.01	0.0867	7	4421	Common	Atp2c1,Cadps,Coro7,Gorasp1,Gorasp2,Tbc1d20,Uso1
MP:0012263	decreased hindbrain size	0.01	0.0867	7	4421	Common	Dyrk1a,Hsd17b7,Itgb1,Pak1ip1,Smg9,Tmem67,Zfp423
MP:0013631	decreased bone trabecular spacing	0.01	0.0867	7	4421	Common	F2r,Ibsp,Plekhm1,Slc39a14,Snx10,Socs2,Spon1
MP:0020066	abnormal neocortex size	0.01	0.0867	7	4421	Common	Arfgef1,Brpf1,Dlg3,Htt,Magoh,Rbm8a,Wdfy3
MP:0005386	behavior/neurological phenotype	1.05e-09	5.23e-06	335	760	Mouse	A4galt,Abcd2,Abl2,Acer3,Acot11,Adam11,Adam22,Adam23,Adamts4,Adck2,Adcyap1r1,Add2,Adgrl1,Adipor1,Adrb3,Afap1,Aff2,Aff3,Ago3,Akap5,Alg10b,Alpl,Ampd3,Ank1,Ankrd6,Anp32e,Ap3b2,Apba2,Aprt,Ar,Arhgap44,Arntl,Arsg,Ass1,Astn1,Atl1,Atxn3,B3galt2,Bahcc1,Bbs1,Bex2,Bsn,Cables1,Cacfd1,Cacna1a,Cacna1b,Cacna1d,Cacna1g,Cacna2d3,Cacnb1,Cadm4,Camk4,Camta1,Car8,Carf,Ccr2,Cd5l,Cdc42ep4,Cdkl5,Celf4,Celf6,Cenpj,Cers6,C…
MP:0004924	abnormal behavior	2.17e-09	5.4e-06	319	760	Mouse	A4galt,Abcd2,Abl2,Acer3,Acot11,Adam11,Adam22,Adam23,Adamts4,Adck2,Adcyap1r1,Add2,Adgrl1,Adipor1,Adrb3,Afap1,Aff2,Aff3,Ago3,Akap5,Alg10b,Alpl,Ampd3,Ank1,Anp32e,Ap3b2,Apba2,Aprt,Ar,Arhgap44,Arntl,Arsg,Ass1,Astn1,Atl1,Atxn3,B3galt2,Bahcc1,Bbs1,Bex2,Bsn,Cables1,Cacfd1,Cacna1a,Cacna1b,Cacna1d,Cacna1g,Cacna2d3,Cacnb1,Cadm4,Camk4,Camta1,Car8,Carf,Ccr2,Cd5l,Cdc42ep4,Cdkl5,Celf4,Celf6,Cenpj,Cers6,Chl1,Chr…
MP:0001405	impaired coordination	8.94e-08	0.000148	64	760	Mouse	Abcd2,Abl2,Acer3,Adam11,Adamts4,Akap5,Alpl,Anp32e,Astn1,B3galt2,Cacna1a,Cacna1g,Cadm4,Camk4,Camta1,Car8,Cdkl5,Cers6,Cmah,Cntnap1,Cplx2,Ctnnd2,Ddc,Dnase1l1,Dock3,Elavl4,Ercc6,Fgf14,Fign,Fzd5,Gdap1,Gria2,Gria3,Jph3,Kcna2,Kif5a,L1cam,Mapk10,Mapk8ip2,Nfasc,Nrcam,Pcdh9,Pde10a,Pla2g6,Plp1,Ppm1l,Prex2,Prkar2b,Ptpn4,Ptprz1,Rora,Slc18a2,Slc8a3,Smpd1,Snap25,Snca,Sp4,Sptbn2,Syt2,Syt4,Timm23,Tmod2,Uchl1,Wisp1
MP:0001516	abnormal motor coordination/ balance	4.15e-07	0.000517	98	760	Mouse	Abcd2,Abl2,Acer3,Adam11,Adam22,Adam23,Adamts4,Akap5,Alpl,Ank1,Anp32e,Arntl,Astn1,B3galt2,Bsn,Cacna1a,Cacna1g,Cadm4,Camk4,Camta1,Car8,Cdkl5,Cers6,Clic5,Cmah,Cntnap1,Cplx2,Ctnna2,Ctnnd2,Cycs,Ddc,Dnase1l1,Dock3,E2f5,Elavl4,Elovl6,Epha4,Ercc6,Fgf14,Fgf7,Fign,Fzd5,Gdap1,Gli2,Gria2,Gria3,Jph3,Kcna1,Kcna2,Kcnj15,Kif5a,L1cam,Ldb3,Lgi4,Lsamp,Mapk10,Mapk8ip2,Mapt,Mpz,Mtcl1,Myrf,Nfasc,Ngfr,Nrcam,Nrep,Pcdh9,…
MP:0003633	abnormal nervous system physiology	5.58e-07	0.000556	193	760	Mouse	Abcd2,Adam22,Adamts4,Adcyap1r1,Add2,Adgrl1,Aff2,Akap5,Alg10b,Alpl,Ap3b2,Arnt2,Ass1,Astn1,B4galnt1,Bbs1,Bsn,C1galt1,Cacna1a,Cacna1b,Cacna1d,Cacna1g,Cacna2d3,Cadm4,Camk4,Car8,Cbfb,Ccr2,Cdc42ep4,Cdkl5,Celf4,Celf6,Chrm2,Chrna3,Cldn5,Cmah,Cntnap1,Col18a1,Col2a1,Cplx2,Ctnna2,Ctnnd2,Cycs,D130043K22Rik,Dagla,Dbh,Ddc,Ddit3,Dgkb,Dlg2,Doc2b,Dock3,Dpp6,Dpysl5,Dsp,E2f5,Efna5,Elavl4,Epha4,Erbb3,Erbb4,Erc2,Fabp…
MP:0003635	abnormal synaptic transmission	7.7e-07	0.000639	88	760	Mouse	Adcyap1r1,Add2,Adgrl1,Aff2,Akap5,Bsn,Cacna1a,Cacna1b,Camk4,Cdc42ep4,Celf6,Chrm2,Chrna3,Cplx2,Ctnna2,Ctnnd2,D130043K22Rik,Dagla,Ddc,Dgkb,Dlg2,Doc2b,Dpp6,Dpysl5,Epha4,Erbb4,Erc2,Fabp7,Fgf14,Fgf7,Frmd5,Fzd3,Gabra3,Gfra1,Gria1,Gria2,Gria3,Gria4,Hbegf,Igsf9,Kcna1,Kcna2,Kif5a,L1cam,Lepr,Mapk8ip2,Mapt,Mmp3,Nalcn,Ncf1,Nedd4l,Nrcam,Nrn1,Nrxn1,Pacsin1,Pak3,Pcdh17,Pcdh9,Pclo,Pomk,Ppp1r9a,Ptpn4,Ptprz1,Ret,Ri…
MP:0003492	abnormal involuntary movement	9.76e-07	0.000694	108	760	Mouse	Abcd2,Abl2,Acer3,Adam23,Ank1,Anp32e,Ap3b2,Arntl,Ass1,B3galt2,Bex2,Bsn,Cacfd1,Cacna1a,Cacna1b,Cacna1d,Cacna1g,Cacna2d3,Cadm4,Camk4,Car8,Cdkl5,Cers6,Chrna3,Clic5,Cmah,Cntnap1,Cplx2,Ctnna2,Cyb561,Cys1,D1Ertd622e,Ddc,Decr1,Dlg2,Dock3,Dpysl5,Elavl4,Elovl6,Epha4,Erbb3,Fam110b,Fgf14,Fgf2,Fgf7,Fign,Fzd3,Gabra3,Gdap1,Gli2,Gpr17,Gria2,Gria3,Gria4,Ikbkg,Inhbb,Isl1,Itga2,Kcna1,Kcna2,Kif5a,Klf7,L1cam,Lepr,Lgi…
[truncated: 42 more rows]
