# Supplementary material for: Transcriptomics as Precision Medicine to Classify <em>In Vivo</em> Models of Dietary-Induced Atherosclerosis at Cellular and Molecular Levels
Source: Preprints.org preprint supplement (doi:10.20944/preprints201809.0082.v1), 2018-09-05
Supplement: Supplementary file 25 [file Supplemental_Table_8.xlsx]

## Sheet: Biological_process
TermID	Term	P	Q	k	n	Query set	Gene symbols
GO:0046907	intracellular transport	1.17e-13	1.07e-09	202	3309	Common	Actr2,Agap3,Als2,Ankrd27,Ankrd54,Ap1b1,Ap1g1,Ap1g2,Ap1m1,Ap1s1,Ap2a1,Ap2m1,Ap3b1,Ap3b2,Ap3m1,Ap3m2,Ap4e1,Ap4m1,Ap4s1,App,Arl3,Arl6,Arl6ip1,Arntl,Aspscr1,Axin1,Bicd2,Bid,Bloc1s2,Bloc1s4,Bloc1s5,Bloc1s6,Cacna1a,Cacnb1,Camk1,Camk4,Cd24a,Cd74,Cdk5,Cep120,Cep57,Chmp5,Col4a3bp,Coro1a,Cttn,Dctn1,Dctn2,Dennd1b,Derl2,Doc2b,Dock7,Dynll1,Emp2,Erc1,Fbxo22,Fgfr2,Fhod1,Flna,Fmr1,Gsk3b,Htt,Ick,Ift122,Ift140,Ift…
GO:0051641	cellular localization	5.82e-13	2.66e-09	353	3309	Common	Actr2,Agap3,Ahi1,Ajuba,Als2,Amph,Ank2,Ank3,Ankrd27,Ankrd54,Ap1b1,Ap1g1,Ap1g2,Ap1m1,Ap1s1,Ap1s2,Ap2a1,Ap2b1,Ap2m1,Ap3b1,Ap3b2,Ap3m1,Ap3m2,Ap4e1,Ap4m1,Ap4s1,App,Arf6,Arl3,Arl6,Arl6ip1,Armcx3,Arntl,Aspm,Aspscr1,Atg9a,Atm,Atp6ap1,Axin1,Bag1,Bag4,Banp,Bax,Bbs2,Bbs4,Bicd2,Bid,Bin1,Bloc1s2,Bloc1s4,Bloc1s5,Bloc1s6,Brca2,Bub1b,C2cd5,Cacna1a,Cacna1b,Cacnb1,Camk1,Camk4,Canx,Carm1,Casc3,Cc2d2a,Ccdc141,Cd24a,…
GO:0051649	establishment of localization in cell	8.9e-13	2.71e-09	243	3309	Common	Actr2,Agap3,Ahi1,Als2,Amph,Ankrd27,Ankrd54,Ap1b1,Ap1g1,Ap1g2,Ap1m1,Ap1s1,Ap1s2,Ap2a1,Ap2b1,Ap2m1,Ap3b1,Ap3b2,Ap3m1,Ap3m2,Ap4e1,Ap4m1,Ap4s1,App,Arl3,Arl6,Arl6ip1,Arntl,Aspscr1,Atm,Axin1,Bax,Bicd2,Bid,Bloc1s2,Bloc1s4,Bloc1s5,Bloc1s6,Cacna1a,Cacna1b,Cacnb1,Camk1,Camk4,Canx,Cd24a,Cd74,Cdk5,Cdk5rap2,Cep120,Cep57,Cep83,Chmp5,Clcn3,Cln8,Col4a3bp,Coro1a,Cttn,Dctn1,Dctn2,Ddit3,Dennd1b,Derl2,Dgki,Dnajc6,Do…
GO:1901564	organonitrogen compound metabolic process	4.67e-10	1.07e-06	692	3309	Common	1500015O10Rik,Aars,Aasdh,Aass,Abhd12,Abhd13,Abhd17b,Acacb,Acadl,Acadm,Acot8,Acot9,Acss1,Acvr1b,Adam10,Adam17,Adam19,Adam9,Adamts2,Adamts4,Adamts7,Adamts9,Adcy2,Adcy3,Adcy5,Add1,Adk,Adprh,Adss,Afg3l1,Agap3,Agbl5,Agk,Agtpbp1,Alas2,Aldh18a1,Aldh5a1,Aldh9a1,Amd1,Ampd2,Ampd3,Anapc10,Ank1,Apob,App,Aprt,Arid4a,Arntl,Arrdc4,Asb2,Asl,Asmt,Ate1,Atg16l1,Atg5,Atg7,Atm,Atp7a,Atpif1,Atr,Atxn3,Axin1,Azin1,Azin2…
GO:0044267	cellular protein metabolic process	8.29e-10	1.52e-06	449	3309	Common	1500015O10Rik,Aars,Abhd12,Abhd13,Abhd17b,Acvr1b,Adam10,Adprh,Afg3l1,Agap3,Agbl5,Agtpbp1,Anapc10,App,Arid4a,Arntl,Arrdc4,Asb2,Ate1,Atg16l1,Atg5,Atg7,Atm,Atp7a,Atr,Atxn3,Axin1,B3gnt2,B4galt1,B4gat1,Bag6,Baz2a,Bcl2,Bgn,Bmi1,Brd4,Brpf1,Btg1,Btk,Btrc,C1galt1c1,Camk1,Camk2g,Camk4,Carm1,Cbx4,Ccdc47,Cdk2,Cdk5,Cfl1,Chek2,Chfr,Chuk,Clk2,Clk3,Cln8,Cry1,Csk,Csnk1a1,Csnk1d,Csnk1e,Ctr9,Ctss,Cul1,Cul4a,Cyld,Dab…
GO:0016192	vesicle-mediated transport	3.8e-09	5.8e-06	177	3309	Common	Ahi1,Aif1,Als2,Amph,Ap1b1,Ap1g1,Ap1g2,Ap1m1,Ap1s1,Ap1s2,Ap2a1,Ap2b1,Ap2m1,Ap3b1,Ap3b2,Ap3m1,Ap3m2,Ap4e1,Ap4m1,Ap4s1,App,Arcn1,Becn1,Bicd2,Bloc1s2,Bloc1s4,Bloc1s5,Bloc1s6,C2cd5,C3,Cacna1a,Canx,Cap1,Cav1,Cav2,Cd14,Cd24a,Cd36,Cd47,Cd81,Cd9,Cdk16,Chmp5,Clcn3,Cln3,Coro1a,Coro1c,Cubn,Dab2,Dennd1b,Dmtn,Dnajc6,Doc2b,Dock2,Dysf,Eif2ak1,Elmo1,Emp2,Erc1,Ezr,Fcgr1,Fcgr2b,Fgfr2,Flna,Gak,Gpr107,Gria1,Gsn,Hck,H…
GO:0044237	cellular metabolic process	2.12e-08	2.78e-05	979	3309	Common	1500015O10Rik,Aars,Aasdh,Aass,Abcd1,Abhd12,Abhd13,Abhd16a,Abhd17b,Abhd6,Abt1,Acaa1a,Acacb,Acadl,Acadm,Acadvl,Acot7,Acot8,Acot9,Acss1,Acvr1b,Adam10,Adar,Adarb1,Adcy2,Adcy3,Adcy5,Add1,Adh1,Adipoq,Adk,Adprh,Adss,Aff3,Afg3l1,Agap3,Agbl5,Agk,Agl,Agpat1,Agpat4,Agpat5,Agtpbp1,Ahr,Ajuba,Akr1a1,Alas2,Aldh18a1,Aldh1a1,Aldh1a2,Aldh1a3,Aldh5a1,Aldh9a1,Alkbh8,Alox5,Alox5ap,Als2,Amacr,Ambra1,Amd1,Ampd2,Ampd3,A…
GO:0019538	protein metabolic process	2.59e-08	2.96e-05	527	3309	Common	1500015O10Rik,Aars,Abhd12,Abhd13,Abhd17b,Acvr1b,Adam10,Adam17,Adam19,Adam9,Adamts2,Adamts4,Adamts7,Adamts9,Add1,Adprh,Afg3l1,Agap3,Agbl5,Agtpbp1,Alas2,Anapc10,Apob,App,Arid4a,Arntl,Arrdc4,Asb2,Ate1,Atg16l1,Atg5,Atg7,Atm,Atp7a,Atr,Atxn3,Axin1,B3gnt2,B4galt1,B4gat1,Bace1,Bag6,Baz2a,Bcl2,Bgn,Bmi1,Brd4,Brpf1,Btg1,Btk,Btrc,C1galt1c1,C3,Camk1,Camk2g,Camk4,Capn1,Capn2,Capn7,Carm1,Casp1,Casp3,Cbx4,Ccdc47…
GO:0006886	intracellular protein transport	3.14e-08	3.2e-05	97	3309	Common	Agap3,Ap1b1,Ap1g1,Ap1g2,Ap1m1,Ap2a1,Ap2m1,Ap3b1,Ap3b2,Ap4e1,Ap4m1,Ap4s1,Arl6,Arl6ip1,Arntl,Aspscr1,Bid,Cacnb1,Cd24a,Cd74,Cdk5,Cep57,Cttn,Derl2,Gsk3b,Ift27,Ing1,Ipo11,Ipo5,Ipo7,Kpna2,Kpna4,Kpna6,Kpnb1,M6pr,Mlph,Mmp12,Mterf4,Myo7a,Napa,Nfkbia,Ngfr,Npm1,Nsg1,Nup155,Nup160,Nup214,Nutf2,Pan3,Pex13,Pex7,Phip,Pik3r1,Pml,Poldip3,Ppp1r3c,Ppp3ca,Ppp3r1,Rab10,Rab1a,Rab27a,Rab2a,Rab6a,Rab7,Ran,Reep2,Rffl,Rtn…
GO:0008152	metabolic process	7.21e-08	6.6e-05	1086	3309	Common	1500015O10Rik,Aars,Aasdh,Aass,Abcd1,Abhd12,Abhd13,Abhd16a,Abhd17b,Abhd6,Abt1,Acaa1a,Acacb,Acadl,Acadm,Acadvl,Acot7,Acot8,Acot9,Acss1,Acvr1b,Adam10,Adam17,Adam19,Adam9,Adamts2,Adamts4,Adamts7,Adamts9,Adar,Adarb1,Adcy2,Adcy3,Adcy5,Add1,Adh1,Adipoq,Adk,Adpgk,Adprh,Adss,Aff3,Afg3l1,Agap3,Agbl5,Agk,Agl,Agpat1,Agpat4,Agpat5,Agtpbp1,Ahr,Ajuba,Akr1a1,Alas2,Aldh18a1,Aldh1a1,Aldh1a2,Aldh1a3,Aldh5a1,Aldh9a1…
GO:0070727	cellular macromolecule localization	8.74e-08	7.27e-05	205	3309	Common	Agap3,Ahi1,Ajuba,Ank2,Ank3,Ap1b1,Ap1g1,Ap1g2,Ap1m1,Ap2a1,Ap2m1,Ap3b1,Ap3b2,Ap4e1,Ap4m1,Ap4s1,Arf6,Arl6,Arl6ip1,Armcx3,Arntl,Aspscr1,Atg9a,Bag1,Bag4,Banp,Bax,Bbs2,Bbs4,Bicd2,Bid,Brca2,Bub1b,C2cd5,Cacna1a,Cacnb1,Carm1,Casc3,Cc2d2a,Cd24a,Cd74,Cdh2,Cdk5,Cep57,Chchd4,Ciz1,Cln3,Cntnap1,Csnk1e,Ctnna1,Cttn,Daxx,Dbn1,Dchs1,Ddit3,Dennd4c,Derl2,Dnaja3,Dnm1l,Dpp6,Ehd3,Emp2,Epb41l3,Etv5,Exoc5,Eya1,Ezh2,Fbln5,…
GO:0071840	cellular component organization or biogenesis	1.05e-07	7.7e-05	940	3309	Common	2700049A03Rik,3110043O21Rik,Aatf,Abca5,Abcb1a,Abi1,Abi3bp,Acp2,Actl6a,Actn1,Actr2,Adam8,Adamts14,Adamts2,Adamts9,Adarb1,Add1,Adgrg6,Adgrl3,Adipoq,Agfg1,Agtpbp1,Ahi1,Ahr,Aif1,Aimp2,Ajuba,Akap8,Akt3,Alcam,Als2,Ank2,Ank3,Ankrd27,Ano6,Anxa7,Apc,App,Aqp1,Arhgap10,Arhgap35,Arhgef26,Arhgef28,Arhgef6,Arid1a,Arid1b,Arid4a,Arl13b,Arl3,Arl6,Arpc2,Arrdc4,Aspm,Atg12,Atg13,Atg16l1,Atg3,Atg4b,Atg5,Atg7,Atg9a,At…
GO:0034613	cellular protein localization	1.09e-07	7.7e-05	203	3309	Common	Agap3,Ahi1,Ajuba,Ank2,Ank3,Ap1b1,Ap1g1,Ap1g2,Ap1m1,Ap2a1,Ap2m1,Ap3b1,Ap3b2,Ap4e1,Ap4m1,Ap4s1,Arf6,Arl6,Arl6ip1,Armcx3,Arntl,Aspscr1,Atg9a,Bag1,Bag4,Banp,Bax,Bbs2,Bbs4,Bicd2,Bid,Brca2,Bub1b,C2cd5,Cacna1a,Cacnb1,Carm1,Cc2d2a,Cd24a,Cd74,Cdh2,Cdk5,Cep57,Chchd4,Ciz1,Cln3,Cntnap1,Csnk1e,Ctnna1,Cttn,Daxx,Dbn1,Dchs1,Ddit3,Dennd4c,Derl2,Dnaja3,Dnm1l,Dpp6,Ehd3,Emp2,Epb41l3,Etv5,Exoc5,Eya1,Ezh2,Fbln5,Fcho2,…
GO:0006914	autophagy	1.37e-07	8.34e-05	33	3309	Common	Ambra1,Atg12,Atg13,Atg14,Atg16l1,Atg3,Atg4b,Atg5,Atg7,Atg9a,Becn1,Cisd2,Cln3,Ei24,Gba,Gopc,Hspa8,Irgm1,Map1lc3b,Mcoln1,Pik3c3,Psen1,Rab7,Rb1cc1,Retreg1,Snapin,Srpx,Ulk1,Ulk2,Vmp1,Vps4a,Vps4b,Wipi2
GO:0061919	process utilizing autophagic mechanism	1.37e-07	8.34e-05	33	3309	Common	Ambra1,Atg12,Atg13,Atg14,Atg16l1,Atg3,Atg4b,Atg5,Atg7,Atg9a,Becn1,Cisd2,Cln3,Ei24,Gba,Gopc,Hspa8,Irgm1,Map1lc3b,Mcoln1,Pik3c3,Psen1,Rab7,Rb1cc1,Retreg1,Snapin,Srpx,Ulk1,Ulk2,Vmp1,Vps4a,Vps4b,Wipi2
GO:0071704	organic substance metabolic process	2.14e-07	0.00012	1027	3309	Common	1500015O10Rik,Aars,Aasdh,Aass,Abcd1,Abhd12,Abhd13,Abhd16a,Abhd17b,Abhd6,Abt1,Acaa1a,Acacb,Acadl,Acadm,Acadvl,Acot7,Acot8,Acot9,Acss1,Acvr1b,Adam10,Adam17,Adam19,Adam9,Adamts2,Adamts4,Adamts7,Adamts9,Adar,Adarb1,Adcy2,Adcy3,Adcy5,Add1,Adh1,Adipoq,Adk,Adpgk,Adprh,Adss,Aff3,Afg3l1,Agap3,Agbl5,Agk,Agl,Agpat1,Agpat4,Agpat5,Agtpbp1,Ahr,Ajuba,Akr1a1,Alas2,Aldh18a1,Aldh1a1,Aldh1a2,Aldh1a3,Aldh5a1,Aldh9a1…
GO:0016043	cellular component organization	2.23e-07	0.00012	930	3309	Common	2700049A03Rik,3110043O21Rik,Abca5,Abcb1a,Abi1,Abi3bp,Acp2,Actl6a,Actn1,Actr2,Adam8,Adamts14,Adamts2,Adamts9,Adarb1,Add1,Adgrg6,Adgrl3,Adipoq,Agfg1,Agtpbp1,Ahi1,Ahr,Aif1,Aimp2,Ajuba,Akap8,Akt3,Alcam,Als2,Ank2,Ank3,Ankrd27,Ano6,Anxa7,Apc,App,Aqp1,Arhgap10,Arhgap35,Arhgef26,Arhgef28,Arhgef6,Arid1a,Arid1b,Arid4a,Arl13b,Arl3,Arl6,Arpc2,Aspm,Atg12,Atg13,Atg16l1,Atg3,Atg4b,Atg5,Atg7,Atg9a,Atm,Atmin,Atp6…
GO:0008104	protein localization	4.19e-07	0.000213	282	3309	Common	Agap3,Agtr1a,Ahi1,Ajuba,Akap10,Akap5,Als2,Als2cl,Ank2,Ank3,Ap1b1,Ap1g1,Ap1g2,Ap1m1,Ap2a1,Ap2m1,Ap3b1,Ap3b2,Ap4e1,Ap4m1,Ap4s1,Apob,Arf5,Arf6,Arl6,Arl6ip1,Armcx3,Arntl,Arrdc4,Aspscr1,Atg9a,Bag1,Bag4,Banp,Bax,Bbs1,Bbs2,Bbs4,Bcl6,Bicd2,Bid,Bloc1s6,Brca2,Bub1b,C2cd5,Cacna1a,Cacnb1,Cadm3,Carm1,Cav1,Cc2d2a,Cd24a,Cd36,Cd74,Cdh2,Cdk5,Cenpe,Cep290,Cep57,Chchd4,Ciz1,Clic5,Cln3,Cntnap1,Coro1c,Csnk1e,Ctnna1,C…
GO:0044248	cellular catabolic process	4.87e-07	0.000232	194	3309	Common	1500015O10Rik,Aass,Abcd1,Abhd12,Abhd16a,Abhd6,Acadl,Acadm,Acadvl,Acot7,Adh1,Adipoq,Agap3,Akr1a1,Aldh5a1,Amacr,Ambra1,Anapc10,Apob,Arntl,Asb2,Ate1,Atg12,Atg13,Atg14,Atg16l1,Atg3,Atg4b,Atg5,Atg7,Atg9a,Atxn3,Auh,Bag6,Bcat1,Bckdhb,Bco2,Becn1,Btrc,Capn1,Ccdc47,Cdk5,Cdo1,Cemip,Ces1d,Chfr,Cisd2,Cln3,Cln6,Cln8,Cnot7,Csad,Ctss,Cul1,Cul4a,Dbh,Dcp2,Ddhd2,Dennd3,Derl2,Dpyd,Eci1,Edem1,Ehhadh,Ei24,Endog,Enpp2,…
GO:0009056	catabolic process	5.08e-07	0.000232	215	3309	Common	1500015O10Rik,Aass,Abcd1,Abhd12,Abhd13,Abhd16a,Abhd17b,Abhd6,Acadl,Acadm,Acadvl,Acot7,Adh1,Adipoq,Agap3,Akr1a1,Aldh5a1,Amacr,Ambra1,Anapc10,Apob,Arntl,Asb2,Ate1,Atg12,Atg13,Atg14,Atg16l1,Atg3,Atg4b,Atg5,Atg7,Atg9a,Atxn3,Auh,Axin1,Bad,Bag6,Bcat1,Bckdhb,Bco2,Becn1,Btrc,Capn1,Ccdc47,Cdk5,Cdo1,Cemip,Ces1d,Chfr,Cisd2,Cln3,Cln6,Cln8,Cnot7,Csad,Ctss,Cul1,Cul2,Cul4a,Dbh,Dcp2,Ddhd2,Dennd3,Derl2,Dhdh,Dpyd,…
GO:0044238	primary metabolic process	7.41e-07	0.000323	949	3309	Common	1500015O10Rik,Aars,Aasdh,Aass,Abcd1,Abhd12,Abhd13,Abhd16a,Abhd17b,Abhd6,Abt1,Acaa1a,Acacb,Acadl,Acadm,Acadvl,Acot7,Acot8,Acot9,Acss1,Acvr1b,Adam10,Adam17,Adam19,Adam9,Adamts2,Adamts4,Adamts7,Adamts9,Adar,Adarb1,Adcy2,Adcy3,Adcy5,Add1,Adh1,Adipoq,Adk,Adpgk,Adprh,Adss,Aff3,Afg3l1,Agap3,Agbl5,Agk,Agl,Agpat1,Agpat4,Agpat5,Agtpbp1,Ahr,Ajuba,Akr1a1,Alas2,Aldh18a1,Aldh1a1,Aldh1a2,Aldh1a3,Aldh5a1,Alkbh8,…
GO:0045184	establishment of protein localization	7.97e-07	0.000332	161	3309	Common	Agap3,Agtr1a,Akap5,Ap1b1,Ap1g1,Ap1g2,Ap1m1,Ap2a1,Ap2m1,Ap3b1,Ap3b2,Ap4e1,Ap4m1,Ap4s1,Apob,Arf5,Arf6,Arl6,Arl6ip1,Arntl,Arrdc4,Aspscr1,Bax,Bid,Bloc1s6,Brca2,Cacnb1,Cd24a,Cd36,Cd74,Cdk5,Cenpe,Cep290,Cep57,Chchd4,Coro1c,Cttn,Cubn,Cyb5r4,Ddit3,Derl2,Dmtn,Ephb6,Fras1,Gnptab,Gsk3b,H2-DMa,Htt,Ift122,Ift20,Ift27,Ikzf1,Il1rn,Ing1,Ipo11,Ipo5,Ipo7,Itga8,Kpna2,Kpna4,Kpna6,Kpnb1,Lcp2,Lyst,M6pr,Mal,Mlph,Mmp12,…
GO:0007033	vacuole organization	1.11e-06	0.000443	36	3309	Common	Acp2,Atg12,Atg13,Atg16l1,Atg3,Atg4b,Atg5,Atg7,Atg9a,Atp6v0c,Becn1,Chmp5,Cln3,Cln5,Cln6,Cln8,Fig4,Gba,Irgm1,Lamtor1,Lyst,Mt3,Myo7a,Pik3c3,Ppt1,Psen1,Rab34,Rb1cc1,Snapin,Spg11,Srpx,Syt7,Tpp1,Ulk1,Vps35,Wipi2
GO:0051248	negative regulation of protein metabolic process	2.05e-06	0.00078	178	3309	Common	3110043O21Rik,Aatf,Adar,Adipoq,Aida,Ankrd26,Anks1,Apbb1,Apc,Apod,Arrb2,Atf3,Atg14,Atg5,Atg7,Axin1,Azin2,Bag1,Bag6,Banp,Bcl2a1d,Bcl3,Bin1,Casp3,Cav1,Cd109,Cd276,Cd59a,Cdk5,Cdkn1a,Cdkn1b,Cdyl,Chordc1,Cib1,Clec16a,Cln3,Cmya5,Cpeb1,Cpeb2,Cry1,Ctdsp1,Ctsa,Dact1,Dedd,Dmtn,Dusp10,Dusp16,Dusp6,Dusp8,Efna1,Eif2ak1,Eif2ak3,Eif2ak4,Eif2s1,Eif4e,Eif4ebp1,Eif4enif1,Eprs,Errfi1,Fabp4,Fbxo7,Flcn,Fmr1,Fnip1,Fry,…
GO:0006796	phosphate-containing compound metabolic process	2.36e-06	0.000865	293	3309	Common	Abhd12,Abhd6,Acacb,Acot8,Acot9,Acss1,Acvr1b,Adam10,Adcy2,Adcy3,Adcy5,Adk,Adss,Agk,Agpat1,Agpat4,Ajuba,Aldh5a1,Ampd2,Ampd3,App,Atm,Atp7a,Atr,Bad,Bcl2,Bid,Brd4,Btk,Btrc,Camk1,Camk2g,Camk4,Cdk2,Cdk5,Cept1,Ces1d,Cfl1,Chek2,Chka,Chpt1,Chuk,Ckm,Clk2,Clk3,Cln8,Coasy,Coq7,Coq9,Crot,Cry1,Csk,Csnk1a1,Csnk1d,Csnk1e,Dab2,Dapk1,Dclk1,Ddr1,Ddr2,Dgat2,Dld,Dok1,Dok2,Dtymk,Dusp10,Dusp6,Dusp8,Egfr,Ehhadh,Eif2a,Eif…
GO:0006793	phosphorus metabolic process	2.51e-06	0.000884	296	3309	Common	Abhd12,Abhd6,Acacb,Acot8,Acot9,Acss1,Acvr1b,Adam10,Adcy2,Adcy3,Adcy5,Adk,Adss,Agk,Agpat1,Agpat4,Ajuba,Aldh5a1,Ampd2,Ampd3,App,Atm,Atp7a,Atr,Bad,Bcl2,Bid,Brd4,Btk,Btrc,Camk1,Camk2g,Camk4,Cdk2,Cdk5,Cept1,Ces1d,Cfl1,Chek2,Chka,Chpt1,Chuk,Ckm,Clk2,Clk3,Cln8,Coasy,Coq7,Coq9,Crot,Cry1,Csk,Csnk1a1,Csnk1d,Csnk1e,Dab2,Dapk1,Dclk1,Ddr1,Ddr2,Dgat2,Dld,Dok1,Dok2,Dtymk,Dusp10,Dusp6,Dusp8,Egfr,Ehhadh,Eif2a,Eif…
GO:0015031	protein transport	3.21e-06	0.00109	144	3309	Common	Agap3,Agtr1a,Akap5,Ap1b1,Ap1g1,Ap1g2,Ap1m1,Ap2a1,Ap2m1,Ap3b1,Ap3b2,Ap4e1,Ap4m1,Ap4s1,Apob,Arf5,Arf6,Arl6,Arl6ip1,Arntl,Arrdc4,Aspscr1,Bid,Bloc1s6,Cacnb1,Cd24a,Cd36,Cd74,Cdk5,Cep290,Cep57,Cttn,Cubn,Cyb5r4,Derl2,Dmtn,Ephb6,Fras1,Gnptab,Gsk3b,H2-DMa,Htt,Ift20,Ift27,Il1rn,Ing1,Ipo11,Ipo5,Ipo7,Kpna2,Kpna4,Kpna6,Kpnb1,Lcp2,Lyst,M6pr,Mlph,Mmp12,Mon1a,Msr1,Mterf4,Myo1b,Myo5a,Myo7a,Napa,Nfkbia,Ngfr,Nlrp3,…
GO:0033036	macromolecule localization	3.5e-06	0.00114	314	3309	Common	Abca5,Abcb1a,Acvr1c,Agap3,Agtr1a,Ahi1,Ajuba,Akap10,Akap5,Als2,Als2cl,Ank2,Ank3,Ap1b1,Ap1g1,Ap1g2,Ap1m1,Ap2a1,Ap2m1,Ap3b1,Ap3b2,Ap4e1,Ap4m1,Ap4s1,Apob,Arf5,Arf6,Arl6,Arl6ip1,Armcx3,Arntl,Arrdc4,Aspscr1,Atg9a,Bag1,Bag4,Banp,Bax,Bbs1,Bbs2,Bbs4,Bcl6,Bicd2,Bid,Bloc1s6,Brca2,Bub1b,C2cd5,Cacna1a,Cacnb1,Cadm3,Carm1,Casc3,Cav1,Cc2d2a,Cd24a,Cd36,Cd74,Cdh2,Cdk5,Cenpe,Cep290,Cep57,Chchd4,Chst11,Cidea,Ciz1,Cl…
GO:0006464	cellular protein modification process	4.33e-06	0.00132	374	3309	Common	Abhd12,Abhd13,Abhd17b,Acvr1b,Adam10,Adprh,Agbl5,Agtpbp1,App,Arid4a,Arrdc4,Asb2,Ate1,Atg16l1,Atg5,Atg7,Atm,Atp7a,Atr,Atxn3,Axin1,B3gnt2,B4galt1,B4gat1,Baz2a,Bcl2,Bgn,Bmi1,Brd4,Brpf1,Btg1,Btk,Btrc,C1galt1c1,Camk1,Camk2g,Camk4,Carm1,Cbx4,Cdk2,Cdk5,Cfl1,Chek2,Chfr,Chuk,Clk2,Clk3,Cry1,Csk,Csnk1a1,Csnk1d,Csnk1e,Ctr9,Cyld,Dab2,Dapk1,Dclk1,Ddr1,Ddr2,Dok1,Dok2,Dpagt1,Dusp10,Dusp6,Edem1,Eed,Egfr,Ehmt1,Ehmt…
GO:0036211	protein modification process	4.33e-06	0.00132	374	3309	Common	Abhd12,Abhd13,Abhd17b,Acvr1b,Adam10,Adprh,Agbl5,Agtpbp1,App,Arid4a,Arrdc4,Asb2,Ate1,Atg16l1,Atg5,Atg7,Atm,Atp7a,Atr,Atxn3,Axin1,B3gnt2,B4galt1,B4gat1,Baz2a,Bcl2,Bgn,Bmi1,Brd4,Brpf1,Btg1,Btk,Btrc,C1galt1c1,Camk1,Camk2g,Camk4,Carm1,Cbx4,Cdk2,Cdk5,Cfl1,Chek2,Chfr,Chuk,Clk2,Clk3,Cry1,Csk,Csnk1a1,Csnk1d,Csnk1e,Ctr9,Cyld,Dab2,Dapk1,Dclk1,Ddr1,Ddr2,Dok1,Dok2,Dpagt1,Dusp10,Dusp6,Edem1,Eed,Egfr,Ehmt1,Ehmt…
GO:0061024	membrane organization	4.6e-06	0.00136	113	3309	Common	Abcb1a,Adam8,Aif1,Ank2,Ano6,Arl6,Atg7,Atp8a1,Atpif1,Bax,Bcl2,Becn1,Bloc1s6,Bok,C2cd5,C3,Cav1,Cd24a,Cd9,Cdan1,Cdh2,Chmp5,Clcn3,Cln3,Cln8,Cxcr4,Dhcr24,Dlg1,Dnaja3,Dnajc11,Dock2,Dysf,Emp2,Epb41l3,Etv5,Fcgr1,Fcgr2b,Fcho2,Gldn,Gphn,Gsk3a,Gsk3b,Gsn,Hk2,Htt,Ier3,Itgb2,Kcnn4,Lpcat2,Lrp4,Magi2,Mal,Mbp,Megf10,Mfge8,Mfn1,Mfn2,Miga1,Miga2,Mpp5,Mt3,Mtss1l,Myh10,Myrf,Ndrg1,Nfasc,Nlgn2,Nol3,Nrcam,Nrxn1,Nsg1,Opa…
GO:0006807	nitrogen compound metabolic process	7.09e-06	0.00203	857	3309	Common	1500015O10Rik,Aars,Aasdh,Aass,Abhd12,Abhd13,Abhd17b,Abt1,Acacb,Acadl,Acadm,Acot8,Acot9,Acss1,Acvr1b,Adam10,Adam17,Adam19,Adam9,Adamts2,Adamts4,Adamts7,Adamts9,Adar,Adarb1,Adcy2,Adcy3,Adcy5,Add1,Adk,Adprh,Adss,Aff3,Afg3l1,Agap3,Agbl5,Agk,Agtpbp1,Ahr,Alas2,Aldh18a1,Aldh5a1,Aldh9a1,Alkbh8,Amd1,Ampd2,Ampd3,Anapc10,Ank1,Apbb1,Aplp1,Apob,App,Aprt,Arid4a,Arid5b,Arntl,Arrdc4,Asb2,Asl,Asmt,Atad5,Ate1,Atg1…
GO:0051246	regulation of protein metabolic process	8.59e-06	0.00238	459	3309	Common	3110043O21Rik,Aars,Aatf,Adam8,Adam9,Adar,Adipoq,Aida,Aimp2,Ajuba,Ankrd26,Ankrd54,Anks1,Apaf1,Apbb1,Apc,Aplp1,Apod,App,Ar,Arid5a,Arntl,Arrb2,Asxl2,Atf3,Atg14,Atg5,Atg7,Atp13a2,Atp6ap1,Axin1,Azin2,Bad,Bag1,Bag4,Bag6,Bak1,Banp,Bax,Bcar3,Bcl10,Bcl2,Bcl2a1d,Bcl3,Bdnf,Bid,Bin1,Bmp4,Bmp6,Bok,Btrc,C1qtnf1,C1qtnf2,C1qtnf3,C3,Cab39,Casp3,Casp8,Casp8ap2,Casp9,Cav1,Cblb,Ccdc88a,Ccdc88c,Ccnyl1,Cd109,Cd1d1,Cd2…
GO:0006996	organelle organization	1.28e-05	0.00336	516	3309	Common	2700049A03Rik,Acp2,Actl6a,Actn1,Actr2,Adgrg6,Agfg1,Agtpbp1,Ahi1,Aif1,Akap8,Als2,Apc,Aqp1,Arhgap10,Arhgap35,Arhgef28,Arid1a,Arid4a,Arl13b,Arl3,Arl6,Aspm,Atg12,Atg13,Atg16l1,Atg3,Atg4b,Atg5,Atg7,Atg9a,Atm,Atmin,Atp6v0c,Atp7a,Atpif1,Atr,Atxn10,Bad,Bag6,Baiap2,Bak1,Bax,Baz1a,Baz1b,Baz2a,Bbs1,Bbs2,Bbs4,Bbs9,Bcas3,Bccip,Bcl2,Bcl6,Becn1,Bicd1,Bicd2,Bid,Bloc1s4,Bloc1s6,Bmi1,Bok,Brca2,Brd4,Brpf1,Brsk1,Bub…
GO:0015833	peptide transport	1.28e-05	0.00336	151	3309	Common	Agap3,Agtr1a,Akap5,Ap1b1,Ap1g1,Ap1g2,Ap1m1,Ap2a1,Ap2m1,Ap3b1,Ap3b2,Ap4e1,Ap4m1,Ap4s1,Apob,Aqp1,Arf5,Arf6,Arl6,Arl6ip1,Arntl,Arrdc4,Aspscr1,Bid,Bloc1s6,Cacnb1,Cd24a,Cd36,Cd74,Cdk16,Cdk5,Cep290,Cep57,Cttn,Cubn,Cyb5r4,Derl2,Disp1,Dmtn,Ephb6,Fras1,Gnptab,Gsk3b,H2-DMa,Htt,Ift20,Ift27,Il1rn,Ing1,Ipo11,Ipo5,Ipo7,Kpna2,Kpna4,Kpna6,Kpnb1,Lcp2,Lyst,M6pr,Mlph,Mmp12,Mon1a,Msr1,Mterf4,Myo1b,Myo5a,Myo7a,Napa,N…
GO:0048284	organelle fusion	1.36e-05	0.00346	21	3309	Common	Bloc1s6,C2cd5,Chmp5,Dysf,Mfn1,Mfn2,Miga1,Miga2,Opa1,Rab34,Samd9l,Snapin,Spg11,Stx3,Stx4a,Stxbp1,Syt7,Usp30,Uvrag,Vamp1,Vamp3
GO:0051648	vesicle localization	1.85e-05	0.00457	43	3309	Common	Ahi1,Ap3b1,Ap3b2,Ap3m1,Ap3m2,Bloc1s2,Bloc1s4,Bloc1s5,Bloc1s6,Cacna1a,Dctn1,Dctn2,Doc2b,Fgfr2,Htt,Kif5b,Mlph,Mreg,Myo1c,Myo5a,Myo7a,Myrip,Nrxn1,Psen1,Rab11a,Rab1a,Rab27a,Rasgrp1,Snap91,Snapin,Snca,Stx4a,Stxbp1,Syde1,Syn1,Synj1,Syt1,Syt4,Syt7,Tpgs1,Trim46,Unc13b,Vamp2
GO:0042886	amide transport	2e-05	0.00483	154	3309	Common	Abcb1a,Agap3,Agtr1a,Akap5,Ap1b1,Ap1g1,Ap1g2,Ap1m1,Ap2a1,Ap2m1,Ap3b1,Ap3b2,Ap4e1,Ap4m1,Ap4s1,Apob,Aqp1,Arf5,Arf6,Arl6,Arl6ip1,Arntl,Arrdc4,Aspscr1,Bid,Bloc1s6,Cacnb1,Cd24a,Cd36,Cd74,Cdk16,Cdk5,Cep290,Cep57,Col4a3bp,Cttn,Cubn,Cyb5r4,Derl2,Disp1,Dmtn,Ephb6,Fras1,Gnptab,Gsk3b,H2-DMa,Htt,Ift20,Ift27,Il1rn,Ing1,Ipo11,Ipo5,Ipo7,Kpna2,Kpna4,Kpna6,Kpnb1,Lcp2,Lyst,M6pr,Mlph,Mmp12,Mon1a,Msr1,Mterf4,Myo1b,My…
GO:2001235	positive regulation of apoptotic signaling pathway	2.08e-05	0.00488	49	3309	Common	Atpif1,Bad,Bax,Bcl10,Bid,Bmf,Bok,Ctnna1,Daxx,Eef1e1,Ei24,Fam162a,Fas,Fbxw7,Flcn,Gsk3a,Gsk3b,Hyal2,Jak2,Maged1,Mal,Mcl1,Myc,Nf1,Nfatc4,Ngfr,Osm,Park7,Pdcd7,Pdia3,Pea15a,Plagl2,Plekhf1,Plscr1,Pml,Ppp2r1a,Prkcd,Prkra,Pten,Ptpn2,Ptprc,Rbck1,Runx3,Siglec1,Sirt1,Srpx,Steap3,Tfap4,Tgfb2
GO:0031400	negative regulation of protein modification process	2.3e-05	0.00526	114	3309	Common	3110043O21Rik,Adar,Adipoq,Aida,Ankrd26,Apc,Arrb2,Atf3,Atg14,Atg5,Atg7,Bag1,Casp3,Cav1,Cd109,Cdk5,Cdkn1a,Cdkn1b,Cdyl,Chordc1,Cib1,Cmya5,Cry1,Ctdsp1,Dact1,Dmtn,Dusp10,Dusp16,Dusp6,Dusp8,Efna1,Errfi1,Fabp4,Fbxo7,Flcn,Fry,Gadd45g,Gclc,Ggnbp2,Gprc5a,Hgf,Hmg20a,Igbp1,Il1b,Impact,Itch,Jarid2,Jun,Kdm1a,Kdm3a,Klf15,L3mbtl2,Lemd2,Lrrk1,Lyn,Mical1,Mtf2,N4bp1,Ncoa7,Ndrg2,Nf1,Nxn,Ogt,Oxr1,Paqr3,Pard3,Park7,Pe…
GO:0043170	macromolecule metabolic process	4e-05	0.00892	714	3309	Common	1500015O10Rik,Aars,Abhd12,Abhd13,Abhd17b,Abt1,Acadm,Acvr1b,Adam10,Adam17,Adam19,Adam9,Adamts2,Adamts4,Adamts7,Adamts9,Adar,Adarb1,Add1,Adprh,Aff3,Afg3l1,Agap3,Agbl5,Agl,Agtpbp1,Ahr,Alas2,Alkbh8,Als2,Anapc10,Ap2b1,Apbb1,Aplp1,Apob,App,Arid4a,Arntl,Arrdc4,Asb2,Atad5,Ate1,Atg16l1,Atg5,Atg7,Atm,Atp7a,Atr,Atxn3,Auh,Axin1,B3gnt2,B4galt1,B4gat1,Bace1,Bag6,Batf,Baz2a,Bcl2,Bgn,Bmi1,Brca2,Brd4,Brpf1,Btg1,B…
GO:0043412	macromolecule modification	4.5e-05	0.0098	395	3309	Common	Aars,Abhd12,Abhd13,Abhd17b,Acvr1b,Adam10,Adar,Adarb1,Adprh,Agbl5,Agtpbp1,Alkbh8,App,Arid4a,Arrdc4,Asb2,Ate1,Atg16l1,Atg5,Atg7,Atm,Atp7a,Atr,Atxn3,Axin1,B3gnt2,B4galt1,B4gat1,Baz2a,Bcl2,Bgn,Bmi1,Brd4,Brpf1,Btg1,Btk,Btrc,C1galt1c1,Camk1,Camk2g,Camk4,Carm1,Cbx4,Cdk2,Cdk5,Cfl1,Chek2,Chfr,Chuk,Clk2,Clk3,Cry1,Csk,Csnk1a1,Csnk1d,Csnk1e,Ctr9,Cyld,Dab2,Dapk1,Dclk1,Ddr1,Ddr2,Dnajb11,Dok1,Dok2,Dpagt1,Dusp10…
GO:0051640	organelle localization	4.7e-05	0.01	98	3309	Common	Ahi1,Ap3b1,Ap3b2,Ap3m1,Ap3m2,Aspm,Atm,Atp6ap1,Bicd2,Bin1,Bloc1s2,Bloc1s4,Bloc1s5,Bloc1s6,Cacna1a,Ccdc141,Cdk5rap2,Cep120,Cep83,Dctn1,Dctn2,Def8,Doc2b,Dock7,Dync1li2,Eya1,Fam98a,Fgfr2,Fhod1,Gpsm2,Hdac6,Hps6,Htt,Ift20,Insc,Kif1b,Kif3c,Kif5b,Lamtor1,Map1b,Map4,Mapt,Mcph1,Milr1,Mlph,Mreg,Mtm1,Myh10,Myo1c,Myo5a,Myo7a,Myrip,Ndel1,Ndrg4,Nectin2,Nin,Npm1,Nr4a3,Nrxn1,Ntn1,Pard3,Pcm1,Pdzd8,Pex13,Plek,Plekh…
GO:0006897	endocytosis	5.05e-05	0.0105	80	3309	Common	Aif1,Amph,Ap2b1,App,Becn1,C3,Canx,Cap1,Cav1,Cav2,Cd14,Cd24a,Cd36,Cd47,Cd81,Cd9,Clcn3,Cln3,Coro1c,Cubn,Dab2,Dnajc6,Dock2,Eif2ak1,Elmo1,Ezr,Fcgr1,Fcgr2b,Gak,Gpr107,Gria1,Gsn,Hck,Hip1,Htr1b,Htr2b,Ifitm3,Inpp5f,Irf8,Itgb2,Jmjd6,Ldlr,Ldlrad3,Lmbrd1,Mapk1,Mapk3,Mapkapk2,Mapkapk3,Megf10,Mertk,Mesd,Mfge8,Myo1g,Myo7a,Necap1,Npc1,Pacsin1,Pear1,Pld2,Pycard,Rab34,Rab5a,Rac1,Scara5,Sirpa,Slc9b2,Snap25,Snap91,…
GO:0044260	cellular macromolecule metabolic process	5.15e-05	0.0105	611	3309	Common	1500015O10Rik,Aars,Abhd12,Abhd13,Abhd17b,Abt1,Acadm,Acvr1b,Adam10,Add1,Adprh,Aff3,Afg3l1,Agap3,Agbl5,Agl,Agtpbp1,Ahr,Alas2,Alkbh8,Als2,Anapc10,Ap2b1,Apbb1,App,Arid4a,Arntl,Arrdc4,Asb2,Atad5,Ate1,Atg16l1,Atg5,Atg7,Atm,Atp7a,Atr,Atxn3,Auh,Axin1,B3gnt2,B4galt1,B4gat1,Bag6,Batf,Baz2a,Bcl2,Bgn,Bmi1,Brca2,Brd4,Brpf1,Btg1,Btk,Btrc,C1galt1c1,Calcoco1,Camk1,Camk2g,Camk4,Caml,Capn1,Carm1,Cavin1,Cbx4,Ccdc47…
GO:0043604	amide biosynthetic process	5.27e-05	0.0105	57	3309	Common	Aars,Aasdh,Acacb,Acss1,Agk,Asmt,B4galnt1,Bdh2,Cers2,Cers4,Cers5,Cers6,Degs1,Degs2,Dhx33,Eef2k,Eif2a,Eif2ak3,Eif2s1,Eif3a,Eif3b,Eif3c,Eif3d,Eif3f,Eif3k,Eif3l,Eif3m,Eif4ebp1,Eprs,Gars,Gclc,Gclm,Ggt5,Gtpbp2,Htt,Iars,Lars,Mars,Mpc1,Mrpl51,Mthfd1,Noa1,P2rx1,Pcsk1,Pcsk5,Qrsl1,Rars,Rbm3,Samd8,Secisbp2,Sepsecs,Sgms1,Sptlc1,Sptlc2,St6galnac6,Trnau1ap,Wars
GO:0032268	regulation of cellular protein metabolic process	5.67e-05	0.0108	408	3309	Common	3110043O21Rik,Aars,Adam8,Adam9,Adar,Adipoq,Aida,Aimp2,Ajuba,Ankrd26,Ankrd54,Anks1,Apaf1,Apc,Aplp1,App,Ar,Arid5a,Arntl,Arrb2,Asxl2,Atf3,Atg14,Atg5,Atg7,Atp13a2,Atp6ap1,Axin1,Bad,Bag1,Bag4,Bag6,Bak1,Bax,Bcar3,Bcl10,Bcl2a1d,Bdnf,Bid,Bin1,Bmp4,Bmp6,Bok,Btrc,C1qtnf1,C1qtnf2,C1qtnf3,C3,Cab39,Casp3,Casp8,Casp8ap2,Casp9,Cav1,Ccdc88a,Ccdc88c,Ccnyl1,Cd109,Cd24a,Cd36,Cd44,Cd59a,Cd74,Cd84,Cdc37,Cdk5,Cdkn1a,C…
GO:0051650	establishment of vesicle localization	5.71e-05	0.0108	39	3309	Common	Ahi1,Ap3b1,Ap3b2,Ap3m1,Ap3m2,Bloc1s2,Bloc1s4,Bloc1s5,Bloc1s6,Cacna1a,Dctn1,Dctn2,Doc2b,Fgfr2,Htt,Kif5b,Mreg,Myo1c,Myo5a,Myo7a,Myrip,Psen1,Rab11a,Rab1a,Rab27a,Rasgrp1,Snap91,Snapin,Snca,Stx4a,Stxbp1,Syde1,Synj1,Syt1,Syt4,Syt7,Trim46,Unc13b,Vamp2
GO:0006810	transport	5.79e-05	0.0108	528	3309	Common	3110043O21Rik,Abca5,Abcb1a,Abcc4,Actr2,Agap3,Agtr1a,Ahi1,Aif1,Akap5,Als2,Amph,Ank1,Ankrd27,Ankrd54,Ano6,Antxr2,Ap1b1,Ap1g1,Ap1g2,Ap1m1,Ap1s1,Ap1s2,Ap2a1,Ap2b1,Ap2m1,Ap3b1,Ap3b2,Ap3m1,Ap3m2,Ap4e1,Ap4m1,Ap4s1,Apba1,Apob,App,Aqp1,Arcn1,Arf5,Arf6,Arid1a,Arl3,Arl6,Arl6ip1,Arl6ip5,Arntl,Arrdc4,Aspscr1,Atox1,Atp2b1,Atp2b4,Atp6v0a1,Atp7a,Atpif1,Axin1,Azin2,B2m,Bax,Bcl2,Becn1,Bicd2,Bid,Bloc1s2,Bloc1s4,Blo…
GO:0051234	establishment of localization	6.77e-05	0.0124	553	3309	Common	3110043O21Rik,Abca5,Abcb1a,Abcc4,Actr2,Agap3,Agtr1a,Ahi1,Aif1,Akap5,Als2,Amph,Ank1,Ankrd27,Ankrd54,Ano6,Antxr2,Ap1b1,Ap1g1,Ap1g2,Ap1m1,Ap1s1,Ap1s2,Ap2a1,Ap2b1,Ap2m1,Ap3b1,Ap3b2,Ap3m1,Ap3m2,Ap4e1,Ap4m1,Ap4s1,Apba1,Apob,App,Aqp1,Arcn1,Arf5,Arf6,Arid1a,Arl3,Arl6,Arl6ip1,Arl6ip5,Arntl,Arrdc4,Aspscr1,Atm,Atox1,Atp2b1,Atp2b4,Atp6ap1,Atp6v0a1,Atp7a,Atpif1,Axin1,Azin2,B2m,Bax,Bcl2,Becn1,Bicd2,Bid,Bloc1s2…
GO:2001233	regulation of apoptotic signaling pathway	7.33e-05	0.0132	99	3309	Common	Atpif1,Bad,Bax,Bcl10,Bcl2,Bid,Bmf,Bmp4,Bok,Cd44,Cd74,Cdk11b,Creb3l1,Ctnna1,Cx3cr1,Dab2,Dapk1,Daxx,Dbh,Eef1e1,Ei24,Erp29,Eya1,Faim,Faim2,Fam162a,Fas,Fbxw7,Flcn,G2e3,Gas1,Grina,Gsk3a,Gsk3b,Hells,Herpud1,Hgf,Higd1a,Hmgb2,Hnrnpk,Hsph1,Hyal2,Ier3,Igbp1,Ing2,Ivns1abp,Jak2,Madd,Maged1,Mal,Mapk8ip1,Mcl1,Meis3,Mkl1,Myc,Nf1,Nfatc4,Ngfr,Nrp1,Opa1,Osm,Park7,Parl,Pdcd7,Pdia3,Pea15a,Pgap2,Pink1,Plagl2,Plekhf1,…
GO:0006950	response to stress	7.61e-05	0.0134	521	3309	Common	1500015O10Rik,Acadl,Acadm,Acadvl,Ackr1,Adam17,Adam8,Adar,Adipoq,Adipor2,Adprhl2,Agap3,Agbl5,Ajuba,Alox5,Alox5ap,Als2,Ano6,Anxa7,Ap3b1,Apaf1,Apbb1,Apod,Aqp1,Arhgap24,Arhgap35,Arnt2,Arntl,Atf2,Atf3,Atg13,Atg14,Atg4b,Atg5,Atg7,Atg9a,Atm,Atp13a2,Atp7a,Atr,Atxn3,B2m,B4galt1,Bad,Bag6,Bak1,Batf,Bax,Bccip,Bcl10,Bcl2,Bcl2l1,Bcl3,Bdnf,Becn1,Bid,Bin3,Bloc1s4,Bloc1s6,Bmf,Bpifa1,Brca2,C1galt1c1,Cacna1a,Cacna1…
GO:0009894	regulation of catabolic process	8.47e-05	0.0146	132	3309	Common	3110043O21Rik,Abhd5,Acacb,Adam8,Adam9,Anks1,Apc,Arntl,Atg7,Atm,Atp13a2,Axin1,Azin2,Bag6,Banp,Bcl2,Becn1,Bmf,Bscl2,Btrc,Casp1,Cblb,Cdc37,Chfr,Chmp4b,Cidea,Clec16a,Cnot7,Crtc3,Csnk1d,Csnk1e,Ctsa,Cttn,Cul4b,Dedd,Dicer1,Edem1,Ehmt2,Eif2ak4,Eif6,Fbxl5,Fbxo22,Fbxw7,Fmr1,Gba,Gclc,Gna12,Gpc3,Gpd1,Gpld1,Herc1,Herpud1,Hmgb1,Hnrnpd,Htr2a,Idh1,Ier3,Ift20,Il1b,Irgm1,Itch,Ldlr,Lrpprc,Mapkapk2,Mettl14,Mettl3,Mf…
GO:0051179	localization	8.74e-05	0.0148	822	3309	Common	3110043O21Rik,Abca5,Abcb1a,Abcc4,Actr2,Acvr1c,Adam17,Adam8,Adam9,Adcy3,Adgrg1,Adgrl3,Agap3,Agtr1a,Ahi1,Aif1,Aimp1,Ajuba,Akap10,Akap5,Als2,Als2cl,Amph,Ank1,Ank2,Ank3,Ankrd27,Ankrd54,Anks1,Ano6,Antxr2,Ap1b1,Ap1g1,Ap1g2,Ap1m1,Ap1s1,Ap1s2,Ap2a1,Ap2b1,Ap2m1,Ap3b1,Ap3b2,Ap3m1,Ap3m2,Ap4e1,Ap4m1,Ap4s1,Apba1,Apc,Apcdd1,Apob,App,Aqp1,Arcn1,Arf5,Arf6,Arhgap24,Arhgap35,Arid1a,Arid5b,Arl13b,Arl3,Arl6,Arl6ip1,…
GO:0032269	negative regulation of cellular protein metabolic process	9.28e-05	0.0154	157	3309	Common	3110043O21Rik,Adar,Adipoq,Aida,Ankrd26,Anks1,Apc,Arrb2,Atf3,Atg14,Atg5,Atg7,Bag1,Bag6,Bcl2a1d,Bin1,Casp3,Cav1,Cd109,Cd59a,Cdk5,Cdkn1a,Cdkn1b,Cdyl,Chordc1,Cib1,Clec16a,Cln3,Cmya5,Cpeb1,Cpeb2,Cry1,Ctdsp1,Dact1,Dmtn,Dusp10,Dusp16,Dusp6,Dusp8,Efna1,Eif2ak3,Eif2ak4,Eif2s1,Eif4e,Eif4ebp1,Eif4enif1,Eprs,Errfi1,Fabp4,Fbxo7,Flcn,Fmr1,Fnip1,Fry,Fxr1,Gadd45g,Gapdh,Gba,Gclc,Ggnbp2,Gprc5a,Hgf,Hmg20a,Igbp1,Il1…
GO:0006919	activation of cysteine-type endopeptidase activity involved in apoptotic process	0.00011	0.0179	20	3309	Common	Apaf1,Bad,Bak1,Bax,Bid,Bok,Casp8,Casp8ap2,Casp9,Diablo,Eif2ak3,Jak2,Myc,Nlrp3,P2rx1,Pdcd6,Pml,Pycard,Stat1,Vcp
GO:0090174	organelle membrane fusion	0.000136	0.0218	15	3309	Common	Bloc1s6,C2cd5,Chmp5,Dysf,Rab34,Samd9l,Snapin,Spg11,Stx3,Stx4a,Stxbp1,Syt7,Uvrag,Vamp1,Vamp3
GO:0007005	mitochondrion organization	0.000143	0.0223	73	3309	Common	Adgrg6,Agtpbp1,Atg13,Atg3,Atg5,Atg7,Atp7a,Atpif1,Bad,Bak1,Bax,Bcl2,Becn1,Bid,Bok,Cav2,Cd24a,Chchd4,Cisd2,Cln8,Col4a3bp,Coq7,Cox10,Cox7a2l,Dap3,Ddhd1,Dnaja3,Dnajc11,Dnm1l,Fis1,Gsk3a,Gsk3b,Hk2,Hmgcl,Htt,Ier3,Lig3,Lpin1,Mcl1,Mfn1,Mfn2,Miga1,Miga2,Mrpl15,Mrpl39,Mterf4,Mtm1,Ndufs6,Nectin2,Nol3,Opa1,Opa3,Pank2,Park7,Parp1,Pnp,Pnpt1,Ppp2cb,Primpol,Ptcd2,Rrm2b,Sco1,Sesn2,Slc22a5,Slirp,Snca,Spg7,Tfam,Timm…
GO:0043043	peptide biosynthetic process	0.000143	0.0223	37	3309	Common	Aars,Aasdh,Bdh2,Dhx33,Eef2k,Eif2a,Eif2ak3,Eif2s1,Eif3a,Eif3b,Eif3c,Eif3d,Eif3f,Eif3k,Eif3l,Eif3m,Eif4ebp1,Eprs,Gars,Gclc,Gclm,Ggt5,Gtpbp2,Iars,Lars,Mars,Mrpl51,Noa1,Pcsk1,Pcsk5,Qrsl1,Rars,Rbm3,Secisbp2,Sepsecs,Trnau1ap,Wars
GO:0033365	protein localization to organelle	0.000161	0.0246	84	3309	Common	Agap3,Ahi1,Ank2,Ap3b1,Arf6,Arl6,Arntl,Atg9a,Bag1,Banp,Bax,Bbs2,Bbs4,Bicd2,Bid,Brca2,Bub1b,Carm1,Cc2d2a,Cdk5,Cep57,Chchd4,Ciz1,Daxx,Ddit3,Dnm1l,Ezh2,Htr2a,Htt,Ift122,Ift20,Ing1,Ipo11,Ipo5,Ipo7,Irs1,Kpna2,Kpna4,Kpna6,Kpnb1,Mapre1,Mcph1,Mmp12,Mterf4,Nfkbia,Nrp1,Nup155,Nup214,Nutf2,Osbpl8,Pcm1,Pex13,Pex7,Phip,Pik3r1,Pml,Ppp3ca,Ppp3r1,Pygo1,Rab11fip3,Rab29,Ran,Scarb2,Sec63,Six4,Smo,Sox9,Spata7,Srgn,Su…
GO:1901575	organic substance catabolic process	0.00017	0.0255	179	3309	Common	1500015O10Rik,Aass,Abcd1,Abhd12,Abhd13,Abhd16a,Abhd17b,Abhd6,Acadl,Acadm,Acadvl,Acot7,Adh1,Adipoq,Agap3,Akr1a1,Aldh5a1,Amacr,Anapc10,Apob,Arntl,Asb2,Ate1,Atg7,Atxn3,Auh,Axin1,Bad,Bag6,Bcat1,Bckdhb,Bco2,Btrc,Capn1,Ccdc47,Cdk5,Cdo1,Cemip,Ces1d,Chfr,Cln6,Cln8,Cnot7,Csad,Ctss,Cul1,Cul2,Cul4a,Dbh,Dcp2,Ddhd2,Dennd3,Derl2,Dhdh,Dpyd,Eci1,Edem1,Ehhadh,Endog,Enpp2,Entpd3,Exosc5,Fbxl3,Fbxo45,Fbxw11,Fbxw7,Ga…
GO:0030705	cytoskeleton-dependent intracellular transport	0.000177	0.0257	44	3309	Common	Ap3b1,Ap3b2,Ap3m1,Ap3m2,App,Arl3,Bicd2,Bloc1s2,Bloc1s4,Bloc1s5,Bloc1s6,Dynll1,Fmr1,Htt,Ick,Ift122,Ift140,Ift20,Ift27,Kif1b,Kif3c,Kif5a,Kif5b,Klc1,Map1b,Mapt,Myo1c,Myo5a,Myrip,Ndel1,Nefm,Rasgrp1,Snapin,Sod1,Spast,Spg11,Spg7,Sun2,Terf2,Trak1,Trim46,Ttc21b,Ttc26,Uchl1
GO:1901998	toxin transport	0.000177	0.0257	25	3309	Common	Antxr2,Arid1a,Atp6v0a1,Casp1,Cct2,Cct3,Cct4,Cct5,Cct7,Cct8,Cd274,Copb2,Copz1,Crtc2,Dnaja1,Hspa5,Mtmr12,Nrp1,Ptprg,Rab28,Scfd1,Tcp1,Trip4,Vamp4,Vps11
GO:0072594	establishment of protein localization to organelle	0.000182	0.026	41	3309	Common	Agap3,Ap3b1,Arntl,Bax,Bid,Brca2,Cep57,Chchd4,Ddit3,Ift122,Ing1,Ipo11,Ipo5,Ipo7,Kpna2,Kpna4,Kpna6,Kpnb1,Mmp12,Mterf4,Nfkbia,Nup155,Nup214,Nutf2,Pex13,Pex7,Phip,Pik3r1,Pml,Ppp3ca,Ppp3r1,Ran,Scarb2,Sec63,Timm10,Timm9,Tnfaip3,Tsc2,Tspo,Txnip,Zfand6
GO:0042176	regulation of protein catabolic process	0.000188	0.0265	67	3309	Common	Adam8,Adam9,Anks1,Apc,Arntl,Atg7,Atp13a2,Axin1,Azin2,Bag6,Banp,Btrc,Cblb,Chfr,Clec16a,Csnk1d,Csnk1e,Ctsa,Cul4b,Dedd,Edem1,Fbxl5,Fbxo22,Fbxw7,Fmr1,Gba,Gclc,Gna12,Gpc3,Gpld1,Herpud1,Ier3,Itch,Ldlr,Mtm1,Mycbp2,N4bp1,Ndfip1,Nos2,Nrg1,Oaz2,Odc1,Park7,Pias1,Psen1,Ptk2,Ptk2b,Rgma,Rhbdd3,Rnf180,Samd9l,Sco1,Serpine2,Sgsm3,Sirt2,Smarcc1,Sox9,Sumo3,Tmf1,Tnfaip3,Trib1,Trib2,Trim32,Ube2k,Usp19,Vps35,Xpo1
GO:0016236	macroautophagy	0.000203	0.0282	21	3309	Common	Atg12,Atg13,Atg16l1,Atg3,Atg4b,Atg5,Atg7,Atg9a,Becn1,Cln3,Gba,Irgm1,Mcoln1,Pik3c3,Psen1,Rab7,Rb1cc1,Retreg1,Snapin,Ulk1,Wipi2
GO:0044257	cellular protein catabolic process	0.000215	0.0294	64	3309	Common	1500015O10Rik,Agap3,Anapc10,Arntl,Asb2,Ate1,Atxn3,Bag6,Btrc,Ccdc47,Chfr,Cln8,Ctss,Cul1,Cul4a,Dennd3,Derl2,Edem1,Fbxl3,Fbxo45,Fbxw11,Fbxw7,Gsk3a,Hdac6,Herpud1,Hspa5,Isg15,Itch,Lgmn,Nr1d1,Nrros,Otud5,Plaa,Ppp1r11,Ppp2cb,Ppt1,Prpf19,Psmb5,Psme4,Rbbp6,Rnf111,Rnf34,Skp1a,Skp2,Spop,Syvn1,Trim38,Uba6,Uba7,Ube2g2,Ube2j1,Ube2l3,Ube2l6,Ube2n,Ube4b,Ubr1,Ubr3,Usp44,Vcp,Wfs1,Wwp2,Wwtr1,Zmpste24,Znrf1
GO:0043603	cellular amide metabolic process	0.000243	0.0325	90	3309	Common	Aars,Aasdh,Acacb,Acot8,Acot9,Acss1,Agk,Aldh5a1,Asmt,B4galnt1,Bdh2,Becn1,Btd,Cers2,Cers4,Cers5,Cers6,Ces1d,Col4a3bp,Degs1,Degs2,Dgat2,Dhx33,Eef2k,Ehhadh,Eif2a,Eif2ak3,Eif2s1,Eif3a,Eif3b,Eif3c,Eif3d,Eif3f,Eif3k,Eif3l,Eif3m,Eif4ebp1,Eprs,Ero1lb,Folh1,G6pdx,Galc,Gars,Gba,Gclc,Gclm,Ggt5,Ghr,Gla,Gstk1,Gtpbp2,Htt,Iars,Idh1,Itgb8,Lars,Mars,Mgst1,Mlycd,Mme,Mpc1,Mrpl51,Mthfd1,Mtrr,Noa1,P2rx1,Pcsk1,Pcsk1n,P…
GO:0051603	proteolysis involved in cellular protein catabolic process	0.000245	0.0325	61	3309	Common	1500015O10Rik,Agap3,Anapc10,Arntl,Asb2,Ate1,Atxn3,Bag6,Btrc,Ccdc47,Chfr,Ctss,Cul1,Cul4a,Derl2,Edem1,Fbxl3,Fbxo45,Fbxw11,Fbxw7,Gsk3a,Hdac6,Herpud1,Hspa5,Isg15,Itch,Lgmn,Nr1d1,Nrros,Otud5,Plaa,Ppp1r11,Ppp2cb,Prpf19,Psmb5,Psme4,Rbbp6,Rnf111,Rnf34,Skp1a,Skp2,Spop,Syvn1,Trim38,Uba6,Uba7,Ube2g2,Ube2j1,Ube2l3,Ube2l6,Ube2n,Ube4b,Ubr1,Ubr3,Usp44,Vcp,Wfs1,Wwp2,Wwtr1,Zmpste24,Znrf1
GO:0006906	vesicle fusion	0.000268	0.0351	14	3309	Common	Bloc1s6,C2cd5,Dysf,Rab34,Samd9l,Snapin,Spg11,Stx3,Stx4a,Stxbp1,Syt7,Uvrag,Vamp1,Vamp3
GO:0044085	cellular component biogenesis	0.000273	0.0352	309	3309	Common	2700049A03Rik,Aatf,Actn1,Adgrl3,Adipoq,Agfg1,Ahi1,Aif1,Aimp2,Ajuba,Ano6,Arhgef26,Arhgef6,Arid1b,Arl13b,Arl6,Arrdc4,Aspm,Atg12,Atg13,Atg16l1,Atg3,Atg4b,Atg5,Atg7,Atg9a,Atmin,Atp7a,Atxn10,Axin1,Bag4,Bag6,Baiap2,Bax,Baz2a,Bbs1,Bbs2,Bbs4,Bbs9,Bcl10,Bcl2,Becn1,Bicd1,Bid,Bok,Bysl,C1qtnf1,C1qtnf2,C1qtnf3,C1qtnf7,Cacna1a,Cadm1,Capzb,Cav1,Cav2,Cby1,Cc2d2a,Ccdc136,Cct3,Cct8,Cd74,Cd9,Cdc20,Cdh2,Cdk5,Celf4,C…
GO:0030163	protein catabolic process	0.000298	0.0373	77	3309	Common	1500015O10Rik,Abhd12,Abhd13,Abhd17b,Agap3,Anapc10,Arntl,Asb2,Ate1,Atg7,Atxn3,Axin1,Bag6,Btrc,Ccdc47,Chfr,Cln8,Ctss,Cul1,Cul2,Cul4a,Dennd3,Derl2,Edem1,Fbxl3,Fbxo45,Fbxw11,Fbxw7,Gsk3a,Hdac6,Herpud1,Hspa5,Isg15,Itch,Ldlr,Lgmn,Lypla1,Lypla2,Ngly1,Nr1d1,Nrros,Otud5,Pja1,Plaa,Ppp1r11,Ppp2cb,Ppt1,Prpf19,Psmb3,Psmb5,Psme4,Rbbp6,Rnf111,Rnf34,Skp1a,Skp2,Spop,Syvn1,Trim24,Trim38,Uba6,Uba7,Ube2g2,Ube2j1,Ube2…
GO:0043112	receptor metabolic process	0.000302	0.0373	24	3309	Common	Als2,Ap2b1,Caml,Capn1,Cd36,Cd81,Cd9,Cdk5,Ezr,Gria1,Htr1b,Htr2b,Itgb2,Lgmn,Lmbrd1,Nrg1,Nsg1,Pld2,Snap25,Snx25,Syk,Synj1,Trappc4,Ulk1
GO:0001505	regulation of neurotransmitter levels	0.000302	0.0373	63	3309	Common	Aasdh,Agtpbp1,Aldh5a1,Arl6ip1,Arl6ip5,Atp7a,Cacna1a,Cacna1b,Cav1,Celf6,Chrna3,Cln3,Cln8,Dagla,Daglb,Ddah1,Dgki,Doc2b,Enpp6,Gla,Grik5,Hsp90aa1,Kcnc4,Mef2c,Naalad2,Nat8l,Nf1,Nos2,Nos3,Nrxn1,P2rx4,Park7,Per2,Pfn2,Phgdh,Pkd2,Ppt1,Psen1,Ptk2b,Rab3gap1,Rnf180,Slc1a3,Slc22a3,Slc6a9,Snap25,Snap91,Snapin,Snca,Spr,Stx4a,Stxbp1,Syde1,Syn1,Syn2,Synj1,Syt1,Syt4,Syt7,Tlr2,Tlr4,Unc13b,Vamp2,Zc3h12a
GO:0007269	neurotransmitter secretion	0.000336	0.0405	22	3309	Common	Cacna1a,Cacna1b,Dgki,Doc2b,Nrxn1,Ppt1,Psen1,Slc6a9,Snap25,Snap91,Snapin,Stx4a,Stxbp1,Syde1,Syn1,Syn2,Synj1,Syt1,Syt4,Syt7,Unc13b,Vamp2
GO:0099643	signal release from synapse	0.000336	0.0405	22	3309	Common	Cacna1a,Cacna1b,Dgki,Doc2b,Nrxn1,Ppt1,Psen1,Slc6a9,Snap25,Snap91,Snapin,Stx4a,Stxbp1,Syde1,Syn1,Syn2,Synj1,Syt1,Syt4,Syt7,Unc13b,Vamp2
GO:1905037	autophagosome organization	0.000341	0.0406	16	3309	Common	Atg12,Atg13,Atg16l1,Atg3,Atg4b,Atg5,Atg7,Atg9a,Becn1,Gba,Irgm1,Pik3c3,Psen1,Rb1cc1,Ulk1,Wipi2
GO:0071705	nitrogen compound transport	0.00035	0.0411	193	3309	Common	Abcb1a,Agap3,Agtr1a,Akap5,Ap1b1,Ap1g1,Ap1g2,Ap1m1,Ap2a1,Ap2m1,Ap3b1,Ap3b2,Ap4e1,Ap4m1,Ap4s1,Apba1,Apob,Aqp1,Arf5,Arf6,Arl6,Arl6ip1,Arl6ip5,Arntl,Arrdc4,Aspscr1,Azin2,Bid,Bloc1s6,Cacna1a,Cacnb1,Cadps,Cd24a,Cd36,Cd74,Cdk16,Cdk5,Cep290,Cep57,Cln3,Cln8,Col4a3bp,Ctns,Cttn,Cubn,Cyb5r4,Derl2,Disp1,Dmtn,Ephb6,Fmr1,Fras1,Gnptab,Gsk3b,H2-DMa,Hrg,Htt,Ift20,Ift27,Il1rn,Ing1,Ipo11,Ipo5,Ipo7,Kif5c,Kpna2,Kpna4,…
GO:0016050	vesicle organization	0.000371	0.043	45	3309	Common	Agfg1,Als2,Aqp1,Bcl2,Bloc1s4,Bloc1s6,C2cd5,Cadps,Ccdc136,Clcn3,Dlg4,Dysf,Lamtor1,Lyst,Myo7a,Nbeal2,Nectin2,Rab34,Rab5b,Rab5c,Rfx2,Samd9l,Sec23ip,Serpine2,Snap91,Snapin,Snx19,Spg11,Srgn,Srpx,Stx3,Stx4a,Stx6,Stxbp1,Syt7,Tbc1d20,Tbpl1,Tmf1,Usp8,Uvrag,Vamp1,Vamp3,Vps18,Vps4a,Vps4b
GO:0016311	dephosphorylation	0.000399	0.0457	42	3309	Common	Bcl2,Btrc,Dusp10,Dusp6,Dusp8,Eya1,Eya3,Fam220a,Fbxw11,Inpp5b,Inpp5f,Mtmr2,Mtmr7,Nceh1,Ocrl,Plpp1,Ppm1a,Ppm1e,Ppm1g,Ppp1cb,Ppp1r12a,Ppp1r15a,Ppp2ca,Ppp2r1a,Ppp3ca,Ppp3cb,Ppp3r1,Ppp4r3a,Ptpn1,Ptpn12,Ptpn2,Ptpn22,Ptpn6,Ptpn7,Ptprc,Ptprk,Ptpro,Ptprr,Sdhaf2,Synj1,Thnsl2,Ubash3b
GO:0033554	cellular response to stress	0.000409	0.0462	233	3309	Common	1500015O10Rik,Adprhl2,Agap3,Apaf1,Apbb1,Arntl,Atf2,Atf3,Atg13,Atg14,Atg4b,Atg5,Atg7,Atm,Atp13a2,Atp7a,Atr,Atxn3,Bad,Bag6,Bak1,Batf,Bax,Bccip,Bcl2,Bcl2l1,Becn1,Bid,Bmf,Brca2,Casp3,Casp9,Ccdc47,Cd36,Cdc37,Cdkn1a,Chchd4,Chek2,Col4a3bp,Coq7,Cpeb1,Cpeb2,Creb3l1,Cry1,Ctc1,Dab2,Ddb2,Ddit3,Ddrgk1,Derl1,Derl2,Dhx9,Diablo,Dnajc15,Edem1,Ei24,Eif2a,Eif2ak3,Eif2ak4,Eif2s1,Ep300,Ercc1,Ero1l,Ezh2,Fam162a,Fancd2…
GO:0032990	cell part morphogenesis	0.000419	0.0468	157	3309	Common	3110043O21Rik,Abi1,Adarb1,Alcam,Ank3,Ankrd27,Apc,App,Arhgap35,Arhgef28,Atg7,Atp7a,B3gnt2,B4gat1,Bcl2,Bdnf,Bmpr1b,Boc,Brsk1,Btbd3,Cacna1a,Cdk5,Chl1,Chn1,Cnp,Cntnap1,Col4a3bp,Coq7,Ctnna2,Cxcr4,Cyfip1,Cyfip2,Dact1,Dag1,Dbnl,Dclk1,Ddr1,Dicer1,Dlg4,Dock10,Dpysl5,Efnb1,Eif2ak4,Elavl4,Epb41l3,Epha4,Epha5,Epha7,Etv1,Fbxo45,Fgfr2,Flot1,Flrt1,Fmn1,Fzd3,Gap43,Gas1,Gli2,Gpm6a,Hdac6,Hprt,Impact,Isl1,Kdm1a,Kid…
GO:0032446	protein modification by small protein conjugation	0.000436	0.0481	67	3309	Common	Arrdc4,Asb2,Atg7,Axin1,Bmi1,Btrc,Cbx4,Chfr,Eya1,Fbxl3,Fbxo22,Fbxo25,Fbxo45,Fbxw11,Fem1b,G2e3,Hdac6,Herc4,Itch,Klhl2,Ltn1,March8,Mgrn1,Pcgf5,Pdzrn3,Peli1,Pias1,Pias2,Pias3,Pja1,Rnf111,Rnf115,Rnf13,Rnf149,Rnf180,Rnf2,Rnf20,Rnf220,Rnf31,Rnf41,Rnf5,Rnf8,Skp2,Socs7,Sumo1,Sumo3,Suz12,Taz,Trim24,Trim3,Trim32,Trim37,Trim38,Trim6,Uba5,Uba6,Ube2a,Ube2f,Ube2g1,Ube2z,Ube4a,Ube4b,Ubox5,Ufm1,Wwp2,Wwtr1,Znrf1
GO:0031399	regulation of protein modification process	0.000446	0.0486	309	3309	Common	3110043O21Rik,Adam8,Adar,Adipoq,Aida,Aimp2,Ajuba,Ankrd26,Ankrd54,Apc,Ar,Arid5a,Arntl,Arrb2,Asxl2,Atf3,Atg14,Atg5,Atg7,Atp6ap1,Axin1,Bag1,Bag4,Bcar3,Bdnf,Bmp4,Bmp6,C1qtnf1,C1qtnf2,C1qtnf3,Cab39,Casp3,Cav1,Ccdc88a,Ccdc88c,Ccnyl1,Cd109,Cd24a,Cd36,Cd44,Cd74,Cd84,Cdc37,Cdk5,Cdkn1a,Cdkn1b,Cdon,Cdyl,Cenpe,Chfr,Chordc1,Chrna3,Cib1,Clip3,Cln3,Cmya5,Cry1,Ctdsp1,Ctr9,Cxcr4,Dab2,Dact1,Dhx33,Dicer1,Dlg1,Dmtn,…
GO:1903827	regulation of cellular protein localization	0.000496	0.0534	79	3309	Common	Abhd17b,Apc,Arf6,Astn2,Bcas3,Camk1,Camk4,Cdh2,Cdk5,Cdkn1a,Chchd4,Cib1,Clip3,Commd1,Csnk1e,Cyld,Dab2,Dclk1,Ddrgk1,Dmtn,Dnajc27,Ect2,Edem1,Ei24,Eif2ak3,Gsk3b,Hsph1,Hyal2,Ipo5,Lrp4,Lypla1,Lzts2,Mapk14,Mdfic,Med1,Mesd,Mtcl1,Myo1c,Npm1,Nrxn1,Oaz2,Pdzk1,Pik3r1,Pkdcc,Pkia,Ppm1a,Prkaa1,Prkci,Rab34,Ralgapa2,Ralgapb,Rassf5,Rer1,Ripor2,Rnf168,Rufy3,Shank3,Sorbs1,Sqstm1,Stac,Stom,Stx6,Supt6,Syt11,Tek,Tgfb1,T…
GO:0043068	positive regulation of programmed cell death	0.000501	0.0534	104	3309	Common	Adam8,Aldh1a2,Aldh1a3,Ano6,Apaf1,Apbb2,Apc,Atpif1,B4galt1,Bad,Bag1,Bak1,Bax,Bcl10,Bcl2l1,Bid,Bmf,Bnip3l,Bok,Camk1d,Capn10,Casp3,Casp8,Casp8ap2,Casp9,Cd248,Cd24a,Cdkn1a,Ctnna1,Daxx,Ddit3,Degs1,Diablo,Eef1e1,Ei24,Eif2ak3,Eif5a,Endog,Epha7,Fam162a,Fas,Fbxw7,Flcn,Fnip1,Gsk3a,Gsk3b,Hyal2,Inpp5d,Jak2,Lyn,Maged1,Mal,Map2k4,Mcl1,Mef2c,Myc,Ncoa1,Nf1,Nfatc4,Nfkbid,Ngfr,Nlrp3,Nr4a3,Osm,P2rx1,Park7,Pawr,Pdcd…
GO:0051128	regulation of cellular component organization	0.000526	0.0553	406	3309	Common	3110043O21Rik,Abhd17b,Add1,Adgrb2,Adgre5,Adgrl2,Adgrl3,Ahi1,Ahr,Amigo1,Amigo2,Ankrd27,Ano6,Anxa7,Apbb1,Apbb2,Apc,Arap3,Arf6,Arfgap1,Arhgap24,Arhgap28,Arhgap35,Arhgef15,Arid5a,Arpc2,Asap1,Asxl2,Atad1,Atg3,Atg5,Atg7,Atm,Atmin,Atp13a2,Atp8a1,Atpif1,Atr,Avil,Bag4,Baiap2,Bbs4,Bcas3,Bcl2,Bdnf,Becn1,Bhlhb9,Bid,Bin3,Bmf,Bok,C2cd5,C3,Cacna1a,Camk1d,Caprin1,Caprin2,Capza1,Capzb,Cav1,Cbll1,Ccdc88a,Ccl2,Cd14…
GO:0051174	regulation of phosphorus metabolic process	0.000535	0.0557	285	3309	Common	3110043O21Rik,Adam8,Adar,Adipoq,Aida,Ajuba,Ankrd26,Ankrd54,Apc,Ar,Arrb2,Atf3,Atg14,Atp6ap1,Atp7a,Axin1,Bad,Bag1,Bag4,Bcar3,Bdnf,Birc3,Bmp4,Bmp6,Btbd10,C1qtnf1,C1qtnf2,C1qtnf3,Cab39,Casp3,Cav1,Ccdc88a,Ccdc88c,Ccnyl1,Cd109,Cd24a,Cd36,Cd44,Cd74,Cd84,Cdc37,Cdk5,Cdkn1a,Cdkn1b,Cdon,Cenpe,Chordc1,Chrna3,Cib1,Clip3,Cln3,Cmya5,Cox7a2l,Ctdsp1,Cxcr4,Dab2,Dact1,Dhx33,Dicer1,Dlg1,Dmtn,Dnajc15,Dnajc27,Dnm1l,Du…
GO:0120036	plasma membrane bounded cell projection organization	0.000542	0.0558	287	3309	Common	2700049A03Rik,3110043O21Rik,Abi1,Adarb1,Ahi1,Aif1,Ajuba,Alcam,Ank3,Ankrd27,Ano6,Apc,App,Arhgap35,Arhgef26,Arhgef28,Arhgef6,Arid1b,Arl13b,Arl3,Arl6,Atg7,Atmin,Atp7a,Atxn10,B3gnt2,B4gat1,Bag4,Baiap2,Bbs1,Bbs2,Bbs4,Bbs9,Bcl2,Bdnf,Bloc1s6,Bmpr1b,Boc,Brsk1,Btbd3,Cacna1a,Capzb,Cby1,Cc2d2a,Cd24a,Cdk16,Cdk5,Celsr2,Cenpj,Cep290,Cep83,Chl1,Chn1,Clic5,Cluap1,Cnp,Cntnap1,Coro1a,Csnk1d,Ctnna2,Cxcr4,Cyfip1,Cyf…
GO:1901566	organonitrogen compound biosynthetic process	0.000561	0.057	171	3309	Common	Aars,Aasdh,Acacb,Acss1,Adcy2,Adcy3,Adcy5,Adk,Adss,Agk,Alas2,Aldh18a1,Amd1,Ampd2,Ampd3,Ank1,Aprt,Asmt,Atg16l1,Atg5,Atp7a,Atpif1,B3gnt2,B3gnt5,B4galnt1,B4galt1,B4galt6,B4gat1,Bdh2,C1galt1c1,Cept1,Cers2,Cers4,Cers5,Cers6,Chka,Chpt1,Chst11,Ckm,Coasy,Cox10,Cpox,Csad,Cytl1,Dbh,Degs1,Degs2,Dhx33,Dpagt1,Dtymk,Eef2k,Eif2a,Eif2ak3,Eif2s1,Eif3a,Eif3b,Eif3c,Eif3d,Eif3f,Eif3k,Eif3l,Eif3m,Eif4ebp1,Eprs,Fkrp,G6…
GO:0099111	microtubule-based transport	0.000594	0.0585	41	3309	Common	Ap3b1,Ap3b2,Ap3m1,Ap3m2,App,Arl3,Bicd2,Bloc1s2,Bloc1s4,Bloc1s5,Bloc1s6,Dynll1,Fmr1,Htt,Ick,Ift122,Ift140,Ift20,Ift27,Kif1b,Kif3c,Kif5a,Kif5b,Klc1,Map1b,Mapt,Ndel1,Nefm,Rasgrp1,Snapin,Sod1,Spast,Spg11,Spg7,Sun2,Terf2,Trak1,Trim46,Ttc21b,Ttc26,Uchl1
GO:2000377	regulation of reactive oxygen species metabolic process	0.000594	0.0585	41	3309	Common	Arg2,Atg5,Bcl2,Bco2,Becn1,Birc2,Birc3,Cav1,Cd36,Clcn3,Cxcl1,Ddah1,Eif6,Fbln5,Gla,Hk2,Hsp90aa1,Ier3,Mpv17,Nfe2l2,Park7,Pdgfrb,Pid1,Pink1,Pkd2,Prcp,Ptk2b,Rhoa,Sirt2,Snca,Syk,Szt2,Tigar,Tlr2,Tlr4,Tlr6,Tspo,Tusc2,Ucp1,Vdac1,Zc3h12a
GO:0010970	transport along microtubule	0.000594	0.0585	41	3309	Common	Ap3b1,Ap3b2,Ap3m1,Ap3m2,App,Arl3,Bicd2,Bloc1s2,Bloc1s4,Bloc1s5,Bloc1s6,Dynll1,Fmr1,Htt,Ick,Ift122,Ift140,Ift20,Ift27,Kif1b,Kif3c,Kif5a,Kif5b,Klc1,Map1b,Mapt,Ndel1,Nefm,Rasgrp1,Snapin,Sod1,Spast,Spg11,Spg7,Sun2,Terf2,Trak1,Trim46,Ttc21b,Ttc26,Uchl1
GO:0009987	cellular process	0.000611	0.0586	2399	3309	Common	1500015O10Rik,2700049A03Rik,3110043O21Rik,AI464131,Aars,Aasdh,Aass,Aatf,Abca5,Abcb1a,Abcb7,Abcd1,Abhd12,Abhd13,Abhd16a,Abhd17b,Abhd6,Abi1,Abi3bp,Abt1,Acaa1a,Acacb,Acadl,Acadm,Acadvl,Acot7,Acot8,Acot9,Acp2,Acsl4,Acss1,Actl6a,Actn1,Actr10,Actr2,Acvr1b,Acvrl1,Adam10,Adam15,Adam17,Adam22,Adam8,Adam9,Adamts14,Adamts2,Adamts9,Adar,Adarb1,Adcy2,Adcy3,Adcy5,Adcyap1r1,Add1,Adgrg1,Adgrg6,Adgrl3,Adh1,Adipoq…
GO:0043065	positive regulation of apoptotic process	0.00062	0.0586	102	3309	Common	Adam8,Aldh1a2,Aldh1a3,Ano6,Apaf1,Apbb2,Apc,Atpif1,B4galt1,Bad,Bag1,Bak1,Bax,Bcl10,Bcl2l1,Bid,Bmf,Bnip3l,Bok,Camk1d,Capn10,Casp3,Casp8,Casp8ap2,Casp9,Cd248,Cd24a,Ctnna1,Daxx,Ddit3,Degs1,Diablo,Eef1e1,Ei24,Eif2ak3,Eif5a,Endog,Epha7,Fam162a,Fas,Fbxw7,Flcn,Fnip1,Gsk3a,Gsk3b,Hyal2,Inpp5d,Jak2,Lyn,Maged1,Mal,Map2k4,Mcl1,Mef2c,Myc,Ncoa1,Nf1,Nfatc4,Nfkbid,Ngfr,Nlrp3,Nr4a3,Osm,P2rx1,Park7,Pdcd6,Pdcd7,Pdia…
GO:0019220	regulation of phosphate metabolic process	0.000627	0.0586	284	3309	Common	3110043O21Rik,Adam8,Adar,Adipoq,Aida,Ajuba,Ankrd26,Ankrd54,Apc,Ar,Arrb2,Atf3,Atg14,Atp6ap1,Atp7a,Axin1,Bad,Bag1,Bag4,Bcar3,Bdnf,Birc3,Bmp4,Bmp6,Btbd10,C1qtnf1,C1qtnf2,C1qtnf3,Cab39,Casp3,Cav1,Ccdc88a,Ccdc88c,Ccnyl1,Cd109,Cd24a,Cd36,Cd44,Cd74,Cd84,Cdc37,Cdk5,Cdkn1a,Cdkn1b,Cdon,Cenpe,Chordc1,Chrna3,Cib1,Clip3,Cln3,Cmya5,Cox7a2l,Ctdsp1,Cxcr4,Dab2,Dact1,Dhx33,Dicer1,Dlg1,Dmtn,Dnajc15,Dnajc27,Dnm1l,Du…
GO:0043632	modification-dependent macromolecule catabolic process	0.000634	0.0586	53	3309	Common	1500015O10Rik,Agap3,Anapc10,Arntl,Asb2,Ate1,Atxn3,Bag6,Btrc,Ccdc47,Chfr,Cul1,Cul4a,Edem1,Fbxl3,Fbxo45,Fbxw11,Fbxw7,Gsk3a,Hdac6,Herpud1,Isg15,Itch,Nrros,Otud5,Plaa,Ppp1r11,Ppp2cb,Psmb5,Rbbp6,Rnf111,Rnf34,Skp1a,Skp2,Spop,Syvn1,Trim38,Uba6,Uba7,Ube2g2,Ube2j1,Ube2l3,Ube2l6,Ube2n,Ube4b,Ubr1,Ubr3,Usp44,Wfs1,Wwp2,Wwtr1,Zmpste24,Znrf1
GO:0019941	modification-dependent protein catabolic process	0.000634	0.0586	53	3309	Common	1500015O10Rik,Agap3,Anapc10,Arntl,Asb2,Ate1,Atxn3,Bag6,Btrc,Ccdc47,Chfr,Cul1,Cul4a,Edem1,Fbxl3,Fbxo45,Fbxw11,Fbxw7,Gsk3a,Hdac6,Herpud1,Isg15,Itch,Nrros,Otud5,Plaa,Ppp1r11,Ppp2cb,Psmb5,Rbbp6,Rnf111,Rnf34,Skp1a,Skp2,Spop,Syvn1,Trim38,Uba6,Uba7,Ube2g2,Ube2j1,Ube2l3,Ube2l6,Ube2n,Ube4b,Ubr1,Ubr3,Usp44,Wfs1,Wwp2,Wwtr1,Zmpste24,Znrf1
GO:0019884	antigen processing and presentation of exogenous antigen	0.00064	0.0586	15	3309	Common	Ap3b1,B2m,Cd1d1,Cd74,Ctse,Fcgr1,Fcgr2b,H2-Aa,H2-Ab1,H2-DMa,H2-DMb1,H2-Eb1,Psme1,Tap2,Unc93b1
GO:0000045	autophagosome assembly	0.00064	0.0586	15	3309	Common	Atg12,Atg13,Atg16l1,Atg3,Atg4b,Atg5,Atg7,Atg9a,Becn1,Irgm1,Pik3c3,Psen1,Rb1cc1,Ulk1,Wipi2
GO:0006508	proteolysis	0.000663	0.0601	119	3309	Common	1500015O10Rik,Adam10,Adam17,Adam19,Adam9,Adamts2,Adamts4,Adamts7,Adamts9,Afg3l1,Agap3,Anapc10,Arntl,Asb2,Ate1,Atxn3,Bace1,Bag6,Btrc,Capn1,Capn2,Capn7,Casp1,Casp3,Ccdc47,Chfr,Cln3,Cndp2,Ctsc,Ctsh,Ctsl,Ctss,Cul1,Cul4a,Cyld,Derl2,Dhcr24,Dld,Edem1,Eif3f,Ero1lb,Fbxl3,Fbxo45,Fbxw11,Fbxw7,Fkrp,Folh1,Furin,Gsk3a,Hdac6,Herpud1,Hspa5,Htra1,Isg15,Itch,Lgmn,Mmp13,Mmp14,Myc,Naalad2,Nr1d1,Nrros,Oma1,Otud5,Otul…
GO:0022607	cellular component assembly	0.000671	0.0602	296	3309	Common	2700049A03Rik,Actn1,Adgrl3,Adipoq,Agfg1,Ahi1,Aif1,Aimp2,Ajuba,Ano6,Arhgef26,Arhgef6,Arid1b,Arl13b,Arl6,Aspm,Atg12,Atg13,Atg16l1,Atg3,Atg4b,Atg5,Atg7,Atg9a,Atmin,Atp7a,Atxn10,Axin1,Bag4,Bag6,Baiap2,Bax,Baz2a,Bbs1,Bbs2,Bbs4,Bbs9,Bcl10,Bcl2,Becn1,Bicd1,Bid,Bok,C1qtnf1,C1qtnf2,C1qtnf3,C1qtnf7,Cacna1a,Cadm1,Capzb,Cav1,Cav2,Cby1,Cc2d2a,Ccdc136,Cct3,Cct8,Cd74,Cd9,Cdc20,Cdh2,Cdk5,Celf4,Celsr2,Cenpj,Cep15…
GO:0051656	establishment of organelle localization	0.000685	0.0609	73	3309	Common	Ahi1,Ap3b1,Ap3b2,Ap3m1,Ap3m2,Atm,Atp6ap1,Bicd2,Bloc1s2,Bloc1s4,Bloc1s5,Bloc1s6,Cacna1a,Cdk5rap2,Cep120,Cep83,Dctn1,Dctn2,Doc2b,Dock7,Eya1,Fgfr2,Fhod1,Gpsm2,Htt,Insc,Kif1b,Kif3c,Kif5b,Map1b,Map4,Mapt,Mcph1,Milr1,Mreg,Myh10,Myo1c,Myo5a,Myo7a,Myrip,Nectin2,Npm1,Nr4a3,Ntn1,Pcm1,Psen1,Ptk2,Rab11a,Rab1a,Rab27a,Rasgrp1,Snap91,Snapin,Snca,Spag5,Spast,Stx4a,Stxbp1,Sun2,Syde1,Synj1,Syt1,Syt4,Syt7,Tacc1,Ter…
GO:0030258	lipid modification	0.00073	0.0643	24	3309	Common	Abcd1,Acadl,Acadm,Acadvl,Adipoq,Agk,Eci1,Ehhadh,Hadha,Hadhb,Hsd17b4,Inpp5b,Inpp5f,Mapk14,Mtmr2,Mtmr7,Ocrl,Pex13,Pex7,Pi4ka,Prkaa1,Slc35c1,Stard4,Synj1
GO:0098657	import into cell	0.000743	0.0644	86	3309	Common	Aif1,Amph,Ap2b1,App,Becn1,C3,Canx,Cap1,Cav1,Cav2,Cd14,Cd24a,Cd36,Cd47,Cd81,Cd9,Clcn3,Cln3,Cln8,Coro1c,Cubn,Dab2,Dnajc6,Dock2,Eif2ak1,Elmo1,Ezr,Fcgr1,Fcgr2b,Gak,Gpr107,Gria1,Gsn,Hck,Hip1,Htr1b,Htr2b,Ifitm3,Inpp5f,Irf8,Itgb2,Jmjd6,Ldlr,Ldlrad3,Lmbrd1,Mapk1,Mapk3,Mapkapk2,Mapkapk3,Megf10,Mertk,Mesd,Mfge8,Myo1g,Myo7a,Necap1,Npc1,Pacsin1,Park7,Pear1,Pld2,Pycard,Rab34,Rab5a,Rac1,Scara5,Sirpa,Slc1a3,Slc…
GO:0070647	protein modification by small protein conjugation or removal	0.000746	0.0644	80	3309	Common	Arrdc4,Asb2,Atg7,Atxn3,Axin1,Bmi1,Btrc,Cbx4,Chfr,Cyld,Eif3f,Eya1,Fbxl3,Fbxo22,Fbxo25,Fbxo45,Fbxw11,Fem1b,G2e3,Hdac6,Herc4,Itch,Klhl2,Ltn1,March8,Mgrn1,Otulin,Pcgf5,Pdzrn3,Peli1,Pias1,Pias2,Pias3,Pja1,Rnf111,Rnf115,Rnf13,Rnf149,Rnf180,Rnf2,Rnf20,Rnf220,Rnf31,Rnf41,Rnf5,Rnf8,Senp2,Skp2,Socs7,Sumo1,Sumo3,Suz12,Taz,Tnfaip3,Trim24,Trim3,Trim32,Trim37,Trim38,Trim6,Uba5,Uba6,Ube2a,Ube2f,Ube2g1,Ube2z,Ube…
GO:0030030	cell projection organization	0.000765	0.0649	291	3309	Common	2700049A03Rik,3110043O21Rik,Abi1,Adarb1,Ahi1,Aif1,Ajuba,Alcam,Ank3,Ankrd27,Ano6,Apc,App,Arhgap35,Arhgef26,Arhgef28,Arhgef6,Arid1b,Arl13b,Arl3,Arl6,Atg7,Atmin,Atp7a,Atxn10,B3gnt2,B4gat1,Bag4,Baiap2,Bbs1,Bbs2,Bbs4,Bbs9,Bcl2,Bdnf,Bloc1s6,Bmpr1b,Boc,Brsk1,Btbd3,Cacna1a,Capzb,Cby1,Cc2d2a,Cd24a,Cdk16,Cdk5,Celsr2,Cenpj,Cep290,Cep83,Chl1,Chn1,Clic5,Cluap1,Cnp,Cntnap1,Coro1a,Csnk1d,Ctnna2,Cxcr4,Cyfip1,Cyf…
GO:0009057	macromolecule catabolic process	0.000766	0.0649	100	3309	Common	1500015O10Rik,Abhd12,Abhd13,Abhd17b,Agap3,Anapc10,Arntl,Asb2,Ate1,Atg7,Atxn3,Auh,Axin1,Bag6,Btrc,Capn1,Ccdc47,Cdk5,Cemip,Chfr,Cln6,Cln8,Cnot7,Ctss,Cul1,Cul2,Cul4a,Dcp2,Dennd3,Derl2,Edem1,Endog,Exosc5,Fbxl3,Fbxo45,Fbxw11,Fbxw7,Gsk3a,Gtpbp2,Hdac6,Herpud1,Hspa5,Isg15,Itch,Ldlr,Lgmn,Lypla1,Lypla2,Lyve1,Mettl14,Mettl3,Ngly1,Nr1d1,Nrros,Oas2,Otud5,Pan3,Parn,Pfkm,Pja1,Plaa,Pnpt1,Ppp1r11,Ppp2cb,Ppt1,Prpf…
GO:0097479	synaptic vesicle localization	0.000815	0.0684	27	3309	Common	Ap3b1,Ap3b2,Ap3m1,Ap3m2,Bloc1s2,Bloc1s4,Bloc1s5,Bloc1s6,Cacna1a,Doc2b,Fgfr2,Nrxn1,Psen1,Snap91,Snapin,Snca,Stx4a,Stxbp1,Syde1,Syn1,Synj1,Syt1,Syt4,Syt7,Trim46,Unc13b,Vamp2
GO:0001933	negative regulation of protein phosphorylation	0.000834	0.0684	82	3309	Common	3110043O21Rik,Adar,Adipoq,Aida,Ankrd26,Apc,Arrb2,Atf3,Atg14,Bag1,Casp3,Cav1,Cd109,Cdkn1a,Cdkn1b,Chordc1,Cib1,Ctdsp1,Dact1,Dmtn,Dusp10,Dusp16,Dusp6,Dusp8,Efna1,Errfi1,Fabp4,Fbxo7,Flcn,Gadd45g,Ggnbp2,Gprc5a,Hgf,Il1b,Impact,Itch,Jun,Lemd2,Lrrk1,Lyn,Mical1,Ndrg2,Nf1,Paqr3,Pard3,Pkia,Pkib,Plpp3,Ppp1r15a,Prkar1a,Prkca,Prkcd,Prkrip1,Psen1,Pten,Ptpn2,Ptpn22,Ptpn6,Ptprc,Pwp1,Rabgef1,Rnf149,Samsn1,Sema4d,S…
GO:0006412	translation	0.000846	0.0684	30	3309	Common	Aars,Dhx33,Eef2k,Eif2a,Eif2ak3,Eif2s1,Eif3a,Eif3b,Eif3c,Eif3d,Eif3f,Eif3k,Eif3l,Eif3m,Eif4ebp1,Eprs,Gars,Gtpbp2,Iars,Lars,Mars,Mrpl51,Noa1,Qrsl1,Rars,Rbm3,Secisbp2,Sepsecs,Trnau1ap,Wars
GO:0099003	vesicle-mediated transport in synapse	0.000846	0.0684	30	3309	Common	Amph,Ap3b1,Ap3b2,Ap3m1,Ap3m2,Bloc1s2,Bloc1s4,Bloc1s5,Bloc1s6,Cacna1a,Canx,Cd24a,Dnajc6,Doc2b,Fgfr2,Pacsin1,Psen1,Snap91,Snapin,Snca,Stx4a,Stxbp1,Syde1,Synj1,Syt1,Syt4,Syt7,Trim46,Unc13b,Vamp2
GO:0048812	neuron projection morphogenesis	0.000849	0.0684	147	3309	Common	3110043O21Rik,Abi1,Adarb1,Alcam,Ank3,Ankrd27,Apc,App,Arhgap35,Arhgef28,Atg7,Atp7a,B3gnt2,B4gat1,Bcl2,Bdnf,Bmpr1b,Boc,Brsk1,Btbd3,Cacna1a,Cdk5,Chl1,Chn1,Cnp,Cntnap1,Ctnna2,Cxcr4,Cyfip1,Cyfip2,Dact1,Dag1,Dbnl,Dclk1,Ddr1,Dicer1,Dlg4,Dock10,Dpysl5,Efnb1,Eif2ak4,Elavl4,Epb41l3,Epha4,Epha5,Epha7,Etv1,Fbxo45,Fgfr2,Flot1,Flrt1,Fmn1,Fzd3,Gap43,Gas1,Gli2,Gpm6a,Hdac6,Hprt,Impact,Isl1,Kdm1a,Kidins220,Kif5c,K…
GO:0032835	glomerulus development	0.00086	0.0684	22	3309	Common	Ahr,Ampd2,Basp1,Bcl2,Bmp4,Col4a3,Col4a4,Jag1,Klf15,Lamb2,Lgr4,Mef2c,Mpv17,Mtss1,Myo1e,Nid1,Nup93,Osr1,Pdgfb,Pdgfrb,Ptpro,Wwtr1
GO:0043280	positive regulation of cysteine-type endopeptidase activity involved in apoptotic process	0.00086	0.0684	22	3309	Common	Apaf1,Bad,Bak1,Bax,Bcl10,Bid,Bok,Casp8,Casp8ap2,Casp9,Diablo,Eif2ak3,Jak2,Myc,Nlrp3,P2rx1,Pdcd6,Pml,Pycard,Stat1,Tfap4,Vcp
GO:1901565	organonitrogen compound catabolic process	0.00087	0.0687	111	3309	Common	1500015O10Rik,Aass,Abhd12,Abhd13,Abhd17b,Acadl,Agap3,Aldh5a1,Anapc10,Arntl,Asb2,Ate1,Atg7,Atxn3,Axin1,Bag6,Bcat1,Bckdhb,Btrc,Ccdc47,Cdo1,Cemip,Chfr,Cln8,Csad,Ctss,Cul1,Cul2,Cul4a,Dbh,Dennd3,Derl2,Dpyd,Edem1,Enpp2,Fbxl3,Fbxo45,Fbxw11,Fbxw7,Galc,Gba,Gla,Gls,Got1,Got2,Gsk3a,Gstz1,Hdac6,Herpud1,Hspa5,Isg15,Itch,Itpa,Ldlr,Lgmn,Lypla1,Lypla2,Lyve1,Maoa,Mlycd,Ngly1,Nos2,Nr1d1,Nrros,Nt5e,Nudt1,Otud5,Pcyo…
GO:0030100	regulation of endocytosis	0.000916	0.0716	48	3309	Common	Ahi1,Ano6,Arfgap1,Atad1,Atg3,Atg5,Atg7,C3,Cbll1,Ccl2,Cd14,Cd300lf,Cd36,Cd47,Dab2,Dnajc6,Dock2,Fcgr1,Fcgr2b,Fgr,Flot1,Gpc3,Hip1,Ldlr,Mfge8,Myo18a,Nckap1l,Pacsin1,Pacsin3,Pard3,Plcg2,Ppp3ca,Pycard,Rab5b,Rab5c,Rabgef1,Siglece,Sirpa,Smap1,Syk,Syt11,Syt4,Syt7,Tlr2,Tsc2,Tsg101,Unc119,Wnt5a
GO:0060341	regulation of cellular localization	0.000958	0.074	142	3309	Common	Abhd17b,Ank2,Apc,Arf6,Astn2,Atg5,Atg7,Bad,Bax,Bcas3,C2cd2l,Cacna1a,Camk1,Camk4,Capn10,Cav1,Cdh2,Cdk16,Cdk5,Cdkn1a,Chchd4,Chd7,Chrna3,Cib1,Clip3,Commd1,Csnk1e,Cyld,Dab2,Dclk1,Ddrgk1,Dmtn,Dnajc27,Ect2,Edem1,Ei24,Eif2ak3,Epha5,Fgr,Gpld1,Grik5,Gsk3b,Hmgn3,Hsph1,Hyal2,Ier3,Inpp4b,Inpp5f,Ipo5,Jph3,Kcnc4,Khdrbs1,Lrp4,Lyn,Lypla1,Lzts2,Magi2,Map1b,Map2k1,Mapk1,Mapk14,Mapk3,Mapt,Mdfic,Med1,Mef2c,Mesd,Mtcl1…
GO:0010942	positive regulation of cell death	0.000962	0.074	106	3309	Common	Adam8,Aldh1a2,Aldh1a3,Ano6,Apaf1,Apbb2,Apc,Atpif1,B4galt1,Bad,Bag1,Bak1,Bax,Bcl10,Bcl2l1,Bid,Bmf,Bnip3l,Bok,Camk1d,Capn10,Casp3,Casp8,Casp8ap2,Casp9,Cd248,Cd24a,Cdkn1a,Ctnna1,Daxx,Ddit3,Degs1,Diablo,Eef1e1,Ei24,Eif2ak3,Eif5a,Endog,Epha7,Fam162a,Fas,Fbxw7,Fcgr2b,Flcn,Fnip1,Gsk3a,Gsk3b,Hyal2,Inpp5d,Jak2,Lyn,Maged1,Mal,Map2k4,Mcl1,Mef2c,Mt3,Myc,Ncoa1,Nf1,Nfatc4,Nfkbid,Ngfr,Nlrp3,Nr4a3,Osm,P2rx1,Park…
GO:0008088	axo-dendritic transport	0.000993	0.0743	25	3309	Common	Ap3b1,Ap3b2,Ap3m1,Ap3m2,App,Bloc1s2,Bloc1s4,Bloc1s5,Bloc1s6,Fmr1,Htt,Kif1b,Kif5a,Klc1,Ndel1,Nefm,Snapin,Sod1,Spast,Spg11,Spg7,Terf2,Trak1,Trim46,Uchl1
GO:0007040	lysosome organization	0.000993	0.0743	20	3309	Common	Acp2,Atp6v0c,Becn1,Chmp5,Cln3,Cln5,Cln6,Cln8,Lamtor1,Lyst,Mt3,Myo7a,Ppt1,Rab34,Snapin,Spg11,Srpx,Syt7,Tpp1,Vps35
GO:0080171	lytic vacuole organization	0.000993	0.0743	20	3309	Common	Acp2,Atp6v0c,Becn1,Chmp5,Cln3,Cln5,Cln6,Cln8,Lamtor1,Lyst,Mt3,Myo7a,Ppt1,Rab34,Snapin,Spg11,Srpx,Syt7,Tpp1,Vps35
GO:0031334	positive regulation of protein complex assembly	0.00101	0.0743	34	3309	Common	Ahr,Apc,Arpc2,Asap1,Bag4,Bid,Bmf,Cd24a,Cd36,Dlg1,Evl,Fas,Fmn1,Ikzf1,Irf8,Mapk8,Mapk9,Mlst8,Mtor,Nckap1,Nckap1l,Nin,Pan3,Paxip1,Pfn2,Plek,Prkce,Pycard,Rac1,Src,Tlr4,Tlr6,Togaram1,Wasl
GO:0051169	nuclear transport	0.00101	0.0743	41	3309	Common	Agap3,Ankrd54,Arntl,Axin1,Camk1,Camk4,Cep57,Fbxo22,Gsk3b,Ing1,Ipo11,Ipo5,Ipo7,Kpna2,Kpna4,Kpna6,Kpnb1,Mlx,Mmp12,Mybbp1a,Nfkbia,Npm1,Nup155,Nup160,Nup214,Nutf2,Phax,Phip,Pik3r1,Pml,Poldip3,Ppp3ca,Ppp3r1,Rab18,Ran,Rangrf,Tsc2,Txnip,Xpo1,Xpo5,Xpo7
GO:0006913	nucleocytoplasmic transport	0.00101	0.0743	41	3309	Common	Agap3,Ankrd54,Arntl,Axin1,Camk1,Camk4,Cep57,Fbxo22,Gsk3b,Ing1,Ipo11,Ipo5,Ipo7,Kpna2,Kpna4,Kpna6,Kpnb1,Mlx,Mmp12,Mybbp1a,Nfkbia,Npm1,Nup155,Nup160,Nup214,Nutf2,Phax,Phip,Pik3r1,Pml,Poldip3,Ppp3ca,Ppp3r1,Rab18,Ran,Rangrf,Tsc2,Txnip,Xpo1,Xpo5,Xpo7
GO:0032728	positive regulation of interferon-beta production	0.00103	0.0747	12	3309	Common	Ddx58,Hmgb1,Hmgb2,Ifnar1,Irf3,Irf7,Ptpn22,Tbk1,Tlr2,Tlr3,Tlr4,Zfp64
GO:0017038	protein import	0.00105	0.0757	28	3309	Common	Agap3,Arntl,Cep57,Ing1,Ipo11,Ipo5,Ipo7,Kpna2,Kpna4,Kpna6,Kpnb1,Mmp12,Nfkbia,Nup155,Nup214,Nutf2,Pex13,Pex7,Phip,Pik3r1,Pml,Ppp3ca,Ppp3r1,Ran,Timm10,Timm9,Tsc2,Txnip
GO:0120039	plasma membrane bounded cell projection morphogenesis	0.00109	0.0776	148	3309	Common	3110043O21Rik,Abi1,Adarb1,Alcam,Ank3,Ankrd27,Apc,App,Arhgap35,Arhgef28,Atg7,Atp7a,B3gnt2,B4gat1,Bcl2,Bdnf,Bmpr1b,Boc,Brsk1,Btbd3,Cacna1a,Cdk5,Chl1,Chn1,Cnp,Cntnap1,Ctnna2,Cxcr4,Cyfip1,Cyfip2,Dact1,Dag1,Dbnl,Dclk1,Ddr1,Dicer1,Dlg4,Dock10,Dpysl5,Efnb1,Eif2ak4,Elavl4,Epb41l3,Epha4,Epha5,Epha7,Etv1,Fbxo45,Fgfr2,Flot1,Flrt1,Fmn1,Fzd3,Gap43,Gas1,Gli2,Gpm6a,Hdac6,Hprt,Impact,Isl1,Kdm1a,Kidins220,Kif5c,K…
GO:0042325	regulation of phosphorylation	0.00109	0.0776	269	3309	Common	3110043O21Rik,Adam8,Adar,Adipoq,Aida,Ajuba,Ankrd26,Ankrd54,Apc,Ar,Arrb2,Atf3,Atg14,Atp6ap1,Atp7a,Axin1,Bad,Bag1,Bag4,Bcar3,Bdnf,Birc3,Bmp4,Bmp6,Btbd10,C1qtnf1,C1qtnf2,C1qtnf3,Cab39,Casp3,Cav1,Ccdc88a,Ccdc88c,Ccnyl1,Cd109,Cd24a,Cd36,Cd44,Cd74,Cd84,Cdc37,Cdk5,Cdkn1a,Cdkn1b,Cdon,Cenpe,Chordc1,Chrna3,Cib1,Clip3,Cln3,Cox7a2l,Ctdsp1,Cxcr4,Dab2,Dact1,Dhx33,Dicer1,Dlg1,Dmtn,Dnajc15,Dnajc27,Dusp10,Dusp16,…
GO:0016310	phosphorylation	0.00111	0.0779	161	3309	Common	Acvr1b,Adam10,Agk,App,Atm,Atr,Bcl2,Bid,Brd4,Btk,Camk1,Camk2g,Camk4,Cdk2,Cdk5,Cfl1,Chek2,Chuk,Clk2,Clk3,Coq7,Coq9,Cry1,Csk,Csnk1a1,Csnk1d,Csnk1e,Dab2,Dapk1,Dclk1,Ddr1,Ddr2,Dld,Dok1,Dok2,Egfr,Eif2a,Eif2ak3,Eif2ak4,Eif2s1,Etnk2,Fam20c,Fgr,Fuk,Gab1,Gnptab,Gpi1,Gsk3a,Gsk3b,Hacd3,Hk1,Hk2,Htr2b,Hus1,Ick,Ikbkb,Ilf3,Ilk,Irak1,Jak1,Jak2,Kdr,Lats2,Lif,Limk2,Lyn,Map2k1,Map2k3,Map2k5,Map3k12,Map4k1,Mapk1,Mapk…
GO:0034504	protein localization to nucleus	0.00112	0.0779	38	3309	Common	Agap3,Arntl,Banp,Cdk5,Cep57,Ciz1,Htt,Ing1,Ipo11,Ipo5,Ipo7,Irs1,Kpna2,Kpna4,Kpna6,Kpnb1,Mmp12,Nfkbia,Nup155,Nup214,Nutf2,Osbpl8,Phip,Pik3r1,Pml,Ppp3ca,Ppp3r1,Pygo1,Ran,Six4,Smo,Sox9,Sumo1,Sumo3,Tsc2,Txn1,Txnip,Xpo1
GO:0007264	small GTPase mediated signal transduction	0.00121	0.0837	35	3309	Common	Aif1,Arhgef9,Baiap2,Dbnl,Dnaja3,Dok3,Eps8,Gna12,Gna13,Grb2,Hacd3,Itsn1,Ksr1,Nf1,Nisch,Nras,Pecam1,Phactr4,Rac1,Ralgapa2,Ralgapb,Rap1b,Rap2b,Rap2c,Rhoa,Rhoj,Rit2,Rras2,Sos1,Sos2,Srgap1,Tiam1,Ulk1,Vav3,Wasf2
GO:0035304	regulation of protein dephosphorylation	0.0013	0.0895	9	3309	Common	Cmya5,Igbp1,Pink1,Ppp1r15a,Ppp2r5d,Rcan1,Slc39a10,Swap70,Ywhae
GO:0031503	protein-containing complex localization	0.00132	0.0899	29	3309	Common	Ap2b1,Arl3,Dynll1,Fkbp4,Ick,Ift122,Ift140,Ift20,Ift27,Kif5a,Npm1,Nrxn1,Nsg1,Nup155,Nup160,Nup214,Poldip3,Ran,Reln,Snap25,Snap47,Snapin,Stx3,Synj1,Ttc21b,Ttc26,Vamp2,Vps35,Wasl
GO:0033043	regulation of organelle organization	0.00133	0.0904	188	3309	Common	3110043O21Rik,Apc,Arhgap28,Arhgap35,Arid5a,Arpc2,Asap1,Asxl2,Atg3,Atg5,Atg7,Atm,Atmin,Atp13a2,Atpif1,Atr,Bag4,Bbs4,Bcas3,Becn1,Bok,C2cd5,Capza1,Capzb,Cdc37,Cdh2,Cdk11b,Cdk5rap2,Cenpe,Cenpj,Cep120,Cep97,Cfl1,Chordc1,Clasp1,Clasp2,Clec16a,Coro1a,Ctr9,Cttn,Cyld,Ddhd2,Dixdc1,Dlg1,Dnm1l,Dstn,Dynll1,Eed,Ehmt2,Eif4g3,Eml4,Epha5,Eps8,Ercc1,Evl,Fam162a,Fgr,Fhod3,Flcn,Flna,Fmn1,Fmr1,Fuz,Gata2,Gba,Grik5,Gsk…
GO:0032481	positive regulation of type I interferon production	0.00143	0.0965	21	3309	Common	Cd14,Chuk,Ddx58,Dhx33,Dhx58,Hmgb1,Hmgb2,Hspd1,Ifnar1,Irf1,Irf3,Irf7,Mmp12,Plcg2,Ptpn22,Syk,Tbk1,Tlr2,Tlr3,Tlr4,Zfp64
GO:0050794	regulation of cellular process	7.89e-10	4.28e-06	541	826	Mouse	4930503L19Rik,Abhd2,Ablim1,Abraxas2,Ace,Acvr2a,Adcy4,Adcy6,Adcy9,Adgrf5,Adgrl1,Adipor1,Adrb3,Aebp2,Aff1,Aff2,Ago1,Ago2,Ahcyl1,Ahnak,Akap13,Alkbh1,Alms1,Amotl1,Angpt2,Antxr1,Anxa6,Apobec1,Arhgap21,Arhgap31,Arhgap44,Arhgap5,Arhgef2,Arnt,Arrb1,Ash1l,Atf6,Atf7ip,Atp2a2,Atrx,Atxn1,Atxn1l,Atxn7,Axl,Bcl2l11,Bcr,Birc6,Bmpr1a,Bmpr2,Bnip2,Braf,Brf1,Brwd1,C1d,C1qbp,C2cd3,C3ar1,Cabin1,Cables1,Cacna1d,Carmil1…
GO:0060255	regulation of macromolecule metabolic process	1.68e-09	4.55e-06	318	826	Mouse	Ablim1,Ace,Acvr2a,Aebp2,Aff1,Aff2,Ago1,Ago2,Ahcyl1,Ahnak,Alkbh1,Antxr1,Apobec1,Arnt,Arrb1,Ash1l,Atf6,Atf7ip,Atrx,Atxn1,Atxn7,Bcl2l11,Bmpr1a,Bmpr2,Bnip2,Braf,Brf1,Brwd1,C1d,C1qbp,C2cd3,Cbfa2t2,Cbx1,Cbx5,Ccr2,Cdc42,Cdc73,Cdk6,Cfh,Cflar,Chd8,Clock,Clu,Cnbp,Cnksr3,Cnot6l,Col2a1,Creb1,Creb3l2,Crebbp,Crebl2,Crtc1,Csf1r,Cspg4,Ctdsp2,Ctdspl2,Ctnnb1,Cux1,Cycs,Cyp1b1,Cyp26b1,Dab2ip,Ddx17,Ddx5,Dmd,Dnajc1,Dn…
GO:0019222	regulation of metabolic process	4.6e-09	8.32e-06	335	826	Mouse	Ablim1,Ace,Acvr2a,Adgrf5,Adipor1,Aebp2,Aff1,Aff2,Ago1,Ago2,Ahcyl1,Ahnak,Alkbh1,Antxr1,Apobec1,Arnt,Arrb1,Ash1l,Atf6,Atf7ip,Atrx,Atxn1,Atxn7,Bcl2l11,Bcr,Bmpr1a,Bmpr2,Bnip2,Braf,Brf1,Brwd1,C1d,C1qbp,C2cd3,Cbfa2t2,Cbx1,Cbx5,Ccr2,Cdc42,Cdc73,Cdk6,Cfh,Cflar,Chd8,Clock,Clu,Cnbp,Cnksr3,Cnot6l,Col2a1,Creb1,Creb3l2,Crebbp,Crebl2,Crtc1,Csf1r,Cspg4,Ctdsp2,Ctdspl2,Ctnnb1,Cux1,Cycs,Cyp1b1,Cyp26b1,Dab2ip,Ddx17…
GO:0010468	regulation of gene expression	7.76e-09	1.05e-05	246	826	Mouse	Ablim1,Ace,Acvr2a,Aebp2,Aff1,Aff2,Ago1,Ago2,Ahcyl1,Ahnak,Alkbh1,Apobec1,Arnt,Ash1l,Atf6,Atf7ip,Atrx,Atxn1,Atxn7,Bmpr1a,Bmpr2,Brf1,Brwd1,C1d,C1qbp,Cbfa2t2,Cbx1,Cbx5,Cdc42,Cdc73,Cdk6,Cfh,Cflar,Chd8,Clock,Cnbp,Cnot6l,Col2a1,Creb1,Creb3l2,Crebbp,Crebl2,Crtc1,Ctdspl2,Ctnnb1,Cux1,Cyp1b1,Cyp26b1,Ddx17,Ddx5,Dmd,Dnajc1,Dnajc3,Dnmt1,Dnmt3a,Dyrk1a,Ecm1,Egln1,Epb41l5,Erbb4,Ern1,Ets1,Fam129a,Fech,Fgf2,Fgfr1,F…
GO:0080090	regulation of primary metabolic process	9.86e-09	1.07e-05	303	826	Mouse	Ablim1,Ace,Acvr2a,Adgrf5,Adipor1,Aebp2,Aff1,Aff2,Ago1,Ago2,Ahcyl1,Ahnak,Antxr1,Apobec1,Arnt,Arrb1,Ash1l,Atf6,Atf7ip,Atrx,Atxn1,Atxn7,Bcl2l11,Bmpr1a,Bmpr2,Bnip2,Braf,Brf1,Brwd1,C1d,C1qbp,C2cd3,Cbfa2t2,Cbx1,Cbx5,Ccr2,Cdc42,Cdc73,Cdk6,Cfh,Cflar,Chd8,Clock,Clu,Cnbp,Cnksr3,Cnot6l,Creb1,Creb3l2,Crebbp,Crebl2,Crtc1,Csf1r,Cspg4,Ctdsp2,Ctdspl2,Ctnnb1,Cux1,Cycs,Cyp1b1,Dab2ip,Ddx17,Ddx5,Dmd,Dnajc1,Dnajc3,Dn…
GO:0048523	negative regulation of cellular process	2.58e-08	2.12e-05	279	826	Mouse	4930503L19Rik,Abhd2,Abraxas2,Ace,Adcy6,Adgrf5,Aebp2,Alkbh1,Alms1,Angpt2,Antxr1,Apobec1,Arhgap44,Arhgef2,Arrb1,Ash1l,Atf7ip,Atrx,Atxn1,Atxn7,Axl,Bcr,Birc6,Bmpr1a,Bmpr2,Braf,C1d,Carmil1,Cbfa2t2,Cbx1,Cbx5,Ccl9,Ccr2,Cd200,Cd300a,Cdc73,Cdk12,Cdk13,Cdk6,Cflar,Chd8,Clock,Cnksr3,Cnot6l,Col2a1,Col3a1,Crebbp,Crebrf,Csf1r,Ctdsp2,Ctdspl2,Ctnnb1,Cux1,Cx3cl1,Cyp1b1,Cyp26b1,Dab2ip,Dmd,Dnajc3,Dnmt1,Dnmt3a,Dyrk1a…
GO:0031323	regulation of cellular metabolic process	2.74e-08	2.12e-05	306	826	Mouse	Ablim1,Ace,Acvr2a,Adgrf5,Adipor1,Aebp2,Aff1,Aff2,Ago1,Ago2,Ahcyl1,Ahnak,Antxr1,Apobec1,Arnt,Arrb1,Ash1l,Atf6,Atf7ip,Atrx,Atxn1,Atxn7,Bcl2l11,Bcr,Bmpr1a,Bmpr2,Bnip2,Braf,Brf1,Brwd1,C1d,C1qbp,Cbfa2t2,Cbx1,Cbx5,Ccr2,Cdc42,Cdc73,Cdk6,Cflar,Chd8,Clock,Clu,Cnbp,Cnksr3,Cnot6l,Creb1,Creb3l2,Crebbp,Crebl2,Crtc1,Csf1r,Cspg4,Ctdsp2,Ctdspl2,Ctnnb1,Cux1,Cycs,Cyp1b1,Dab2ip,Ddx17,Ddx5,Dmd,Dnajc1,Dnajc3,Dnmt1,Dn…
GO:0051171	regulation of nitrogen compound metabolic process	7.4e-08	5.02e-05	291	826	Mouse	Ablim1,Ace,Acvr2a,Aebp2,Aff1,Aff2,Ago1,Ago2,Ahcyl1,Ahnak,Antxr1,Apobec1,Arnt,Arrb1,Ash1l,Atf6,Atf7ip,Atrx,Atxn1,Atxn7,Bcl2l11,Bcr,Bmpr1a,Bmpr2,Bnip2,Braf,Brf1,Brwd1,C1d,C1qbp,C2cd3,Cbfa2t2,Cbx1,Cbx5,Ccr2,Cdc42,Cdc73,Cdk6,Cfh,Cflar,Chd8,Clock,Clu,Cnbp,Cnksr3,Cnot6l,Creb1,Creb3l2,Crebbp,Crebl2,Crtc1,Csf1r,Cspg4,Ctdsp2,Ctdspl2,Ctnnb1,Cux1,Cycs,Cyp1b1,Dab2ip,Ddx17,Ddx5,Dmd,Dnajc1,Dnajc3,Dnmt1,Dnmt3a,…
GO:0051252	regulation of RNA metabolic process	1.2e-07	7.22e-05	201	826	Mouse	Ablim1,Acvr2a,Aebp2,Aff1,Aff2,Ago1,Ago2,Ahcyl1,Ahnak,Apobec1,Arnt,Ash1l,Atf6,Atf7ip,Atrx,Atxn1,Atxn7,Bmpr1a,Bmpr2,Brf1,Brwd1,C1d,Cbfa2t2,Cbx1,Cbx5,Cdc73,Cdk6,Cflar,Chd8,Clock,Cnbp,Cnot6l,Creb1,Creb3l2,Crebbp,Crebl2,Crtc1,Ctdspl2,Ctnnb1,Cux1,Cyp1b1,Ddx17,Ddx5,Dmd,Dnmt1,Dnmt3a,Dyrk1a,Ecm1,Egln1,Erbb4,Ern1,Ets1,Fgf2,Fgfr1,Foxo1,Foxo3,Foxp1,Fubp1,Fzd1,Fzd5,Gabpa,Gli1,Gli3,Gon4l,Grem1,Grem2,Gzf1,Hexim…
GO:0048519	negative regulation of biological process	1.4e-07	7.59e-05	304	826	Mouse	4930503L19Rik,Abhd2,Abraxas2,Ace,Adcy6,Adgrf5,Aebp2,Aff2,Ago2,Alkbh1,Alms1,Angpt2,Antxr1,Apobec1,Arhgap44,Arhgef2,Arrb1,Ash1l,Atf7ip,Atp1a2,Atrx,Atxn1,Atxn7,Axl,Bcr,Birc6,Bmpr1a,Bmpr2,Braf,C1d,Carmil1,Cbfa2t2,Cbx1,Cbx5,Ccl9,Ccr2,Cd200,Cd300a,Cdc42,Cdc73,Cdk12,Cdk13,Cdk6,Cflar,Chd8,Clock,Cmklr1,Cnksr3,Cnot6l,Col2a1,Col3a1,Crebbp,Crebrf,Crtc1,Csf1r,Ctdsp2,Ctdspl2,Ctnnb1,Cux1,Cx3cl1,Cyp1b1,Cyp26b1,D…
GO:0050789	regulation of biological process	1.59e-07	7.84e-05	577	826	Mouse	4930503L19Rik,Abca1,Abhd2,Ablim1,Abraxas2,Ace,Acvr2a,Adcy4,Adcy6,Adcy9,Adgrf5,Adgrl1,Adipor1,Adrb3,Aebp2,Aff1,Aff2,Ago1,Ago2,Ahcyl1,Ahnak,Akap13,Alkbh1,Alms1,Amotl1,Angpt2,Antxr1,Anxa6,Apobec1,Arhgap21,Arhgap31,Arhgap44,Arhgap5,Arhgef2,Arnt,Arrb1,Ash1l,Atf6,Atf7ip,Atp1a2,Atp2a2,Atrx,Atxn1,Atxn1l,Atxn7,Axl,Bcl2l11,Bcr,Birc6,Bmpr1a,Bmpr2,Bnip2,Braf,Brf1,Brwd1,Btbd7,C1d,C1qa,C1qbp,C2cd3,C3ar1,C4b,Ca…
GO:0019219	regulation of nucleobase-containing compound metabolic process	6.95e-07	0.000312	208	826	Mouse	Ablim1,Acvr2a,Aebp2,Aff1,Aff2,Ago1,Ago2,Ahcyl1,Ahnak,Apobec1,Arnt,Ash1l,Atf6,Atf7ip,Atrx,Atxn1,Atxn7,Bmpr1a,Bmpr2,Brf1,Brwd1,C1d,Cbfa2t2,Cbx1,Cbx5,Cdc73,Cdk6,Cflar,Chd8,Clock,Cnbp,Cnot6l,Creb1,Creb3l2,Crebbp,Crebl2,Crtc1,Ctdspl2,Ctnnb1,Cux1,Cyp1b1,Ddx17,Ddx5,Dmd,Dnmt1,Dnmt3a,Dyrk1a,Ecm1,Egln1,Entpd5,Erbb4,Ereg,Ern1,Ets1,Fbxo18,Fgf2,Fgfr1,Foxo1,Foxo3,Foxp1,Fubp1,Fzd1,Fzd5,Gabpa,Gli1,Gli3,Gon4l,Gre…
GO:0065007	biological regulation	7.49e-07	0.000312	609	826	Mouse	4930503L19Rik,Abca1,Abhd2,Abl2,Ablim1,Abraxas2,Acaca,Ace,Acvr2a,Adcy4,Adcy6,Adcy7,Adcy9,Adgrf5,Adgrl1,Adipor1,Adrb3,Aebp2,Aff1,Aff2,Ago1,Ago2,Agtrap,Ahcyl1,Ahnak,Akap13,Alkbh1,Alms1,Amotl1,Angpt2,Antxr1,Anxa6,Apobec1,Arhgap21,Arhgap31,Arhgap44,Arhgap5,Arhgef2,Arhgef5,Arid2,Arnt,Arrb1,Ash1l,Atf6,Atf7ip,Atp1a2,Atp2a2,Atrx,Atxn1,Atxn1l,Atxn7,Axl,Bcl2l11,Bcr,Birc6,Bmpr1a,Bmpr2,Bnip2,Braf,Brf1,Brwd1,B…
GO:2000112	regulation of cellular macromolecule biosynthetic process	2.24e-06	0.000868	198	826	Mouse	Ablim1,Acvr2a,Aebp2,Aff1,Ago1,Apobec1,Arnt,Ash1l,Atf6,Atf7ip,Atrx,Atxn1,Atxn7,Bmpr1a,Bmpr2,Brwd1,C1d,C1qbp,Cbfa2t2,Cbx1,Cbx5,Cdc73,Cdk6,Cflar,Chd8,Clock,Cnbp,Cnot6l,Creb1,Creb3l2,Crebbp,Crebl2,Crtc1,Ctdspl2,Ctnnb1,Cux1,Cyp1b1,Ddx5,Dmd,Dnajc1,Dnajc3,Dnmt1,Dnmt3a,Ecm1,Egln1,Erbb4,Ereg,Ets1,Fam129a,Fbxo18,Fech,Fgf2,Fgfr1,Foxo1,Foxo3,Foxp1,Fubp1,Fzd1,Fzd5,Gabpa,Gli1,Gli3,Gon4l,Grb10,Grem1,Grem2,Gzf1,…
GO:0000380	alternative mRNA splicing, via spliceosome	2.85e-06	0.00103	6	826	Mouse	Cdk13,Ddx17,Ddx5,Mbnl1,Pqbp1,Sfswap
GO:0030334	regulation of cell migration	5.17e-06	0.00175	53	826	Mouse	Abhd2,Amotl1,Arhgap5,Arhgef2,Bcr,Braf,C3ar1,Carmil1,Ccbe1,Ccr2,Col18a1,Col3a1,Csf1r,Cxcl12,Cyp1b1,Dab2ip,Ecm1,Epb41l5,Erbb4,F2r,Fer,Fgf2,Gab2,Il1r1,Itgav,Lbp,Lmna,Lrig2,Lrp1,Map3k1,Mmp3,Mtus1,Myocd,Mysm1,Nipbl,Plk2,Plxna1,Plxna2,Ptprj,Sdc4,Sfrp2,Slc8b1,Slk,Spred1,Stap1,Stk10,Syne2,Thbs1,Tie1,Tirap,Tmsb4x,Trp53inp1,Unc5c
GO:0010556	regulation of macromolecule biosynthetic process	5.67e-06	0.00176	201	826	Mouse	Ablim1,Acvr2a,Aebp2,Aff1,Ago1,Apobec1,Arnt,Ash1l,Atf6,Atf7ip,Atrx,Atxn1,Atxn7,Bmpr1a,Bmpr2,Brwd1,C1d,C1qbp,Cbfa2t2,Cbx1,Cbx5,Ccr2,Cdc73,Cdk6,Cflar,Chd8,Clock,Cnbp,Cnot6l,Creb1,Creb3l2,Crebbp,Crebl2,Crtc1,Ctdspl2,Ctnnb1,Cux1,Cyp1b1,Ddx5,Dmd,Dnajc1,Dnajc3,Dnmt1,Dnmt3a,Ecm1,Egln1,Erbb4,Ereg,Ets1,Fam129a,Fbxo18,Fech,Fgf2,Fgfr1,Foxo1,Foxo3,Foxp1,Fubp1,Fzd1,Fzd5,Gabpa,Gli1,Gli3,Gon4l,Grb10,Grem1,Grem2,…
GO:2001141	regulation of RNA biosynthetic process	6.17e-06	0.00176	182	826	Mouse	Ablim1,Acvr2a,Aebp2,Aff1,Ago1,Apobec1,Arnt,Ash1l,Atf6,Atf7ip,Atrx,Atxn1,Atxn7,Bmpr1a,Bmpr2,Brwd1,C1d,Cbfa2t2,Cbx1,Cbx5,Cdc73,Cdk6,Cflar,Chd8,Clock,Cnbp,Creb1,Creb3l2,Crebbp,Crebl2,Crtc1,Ctdspl2,Ctnnb1,Cux1,Cyp1b1,Ddx5,Dmd,Dnmt1,Dnmt3a,Ecm1,Egln1,Erbb4,Ets1,Fgf2,Fgfr1,Foxo1,Foxo3,Foxp1,Fubp1,Fzd1,Fzd5,Gabpa,Gli1,Gli3,Gon4l,Grem1,Grem2,Gzf1,Hexim1,Hipk2,Hist1h1e,Hr,Igf1,Igf1r,Ikzf2,Il33,Inhba,Irf6,…
GO:1903506	regulation of nucleic acid-templated transcription	6.17e-06	0.00176	182	826	Mouse	Ablim1,Acvr2a,Aebp2,Aff1,Ago1,Apobec1,Arnt,Ash1l,Atf6,Atf7ip,Atrx,Atxn1,Atxn7,Bmpr1a,Bmpr2,Brwd1,C1d,Cbfa2t2,Cbx1,Cbx5,Cdc73,Cdk6,Cflar,Chd8,Clock,Cnbp,Creb1,Creb3l2,Crebbp,Crebl2,Crtc1,Ctdspl2,Ctnnb1,Cux1,Cyp1b1,Ddx5,Dmd,Dnmt1,Dnmt3a,Ecm1,Egln1,Erbb4,Ets1,Fgf2,Fgfr1,Foxo1,Foxo3,Foxp1,Fubp1,Fzd1,Fzd5,Gabpa,Gli1,Gli3,Gon4l,Grem1,Grem2,Gzf1,Hexim1,Hipk2,Hist1h1e,Hr,Igf1,Igf1r,Ikzf2,Il33,Inhba,Irf6,…
GO:0031326	regulation of cellular biosynthetic process	7.69e-06	0.00208	207	826	Mouse	Ablim1,Acvr2a,Adgrf5,Aebp2,Aff1,Ago1,Apobec1,Arnt,Ash1l,Atf6,Atf7ip,Atrx,Atxn1,Atxn7,Bmpr1a,Bmpr2,Brwd1,C1d,C1qbp,Cbfa2t2,Cbx1,Cbx5,Ccr2,Cdc73,Cdk6,Cflar,Chd8,Clock,Cnbp,Cnot6l,Creb1,Creb3l2,Crebbp,Crebl2,Crtc1,Ctdspl2,Ctnnb1,Cux1,Cyp1b1,Ddx5,Dmd,Dnajc1,Dnajc3,Dnmt1,Dnmt3a,Ecm1,Egln1,Entpd5,Erbb4,Ereg,Ets1,Fam129a,Fbxo18,Fech,Fgf2,Fgfr1,Foxo1,Foxo3,Foxp1,Fubp1,Fzd1,Fzd5,Gabpa,Gli1,Gli3,Gon4l,Grb1…
GO:0072359	circulatory system development	8.09e-06	0.00208	97	826	Mouse	2410089E03Rik,Acan,Akap13,Angpt2,Antxr1,Arid2,Bmpr1a,Bmpr2,C1galt1,C2cd3,Ccbe1,Ccr2,Cdh5,Col18a1,Col2a1,Col3a1,Ctnnb1,Cx3cl1,Cxcl12,Cyp1b1,Dlc1,Dync2h1,Egln1,Ephb2,Erbb4,Fat4,Fgf2,Fgfr1,Fgfrl1,Flrt2,Flt1,Foxo1,Foxp1,Frs2,Fzd5,Gja5,Gjc1,Greb1l,Grem1,Hectd1,Hexim1,Hspg2,Ift172,Igf1,Itga4,Itgav,Itgb1,Jam3,Kat6a,Lmna,Lrp1,Lrp6,Luzp1,Map3k3,Map3k7,Med12,Mef2a,Megf8,Mib1,Mkl2,Mmrn2,Myocd,Naca,Ncor2,Nds…
GO:0006355	regulation of transcription, DNA-templated	8.43e-06	0.00208	181	826	Mouse	Ablim1,Acvr2a,Aebp2,Aff1,Ago1,Apobec1,Arnt,Ash1l,Atf6,Atf7ip,Atrx,Atxn1,Atxn7,Bmpr1a,Bmpr2,Brwd1,C1d,Cbfa2t2,Cbx1,Cbx5,Cdc73,Cdk6,Cflar,Chd8,Clock,Cnbp,Creb1,Creb3l2,Crebbp,Crebl2,Crtc1,Ctdspl2,Ctnnb1,Cux1,Cyp1b1,Ddx5,Dmd,Dnmt1,Dnmt3a,Ecm1,Egln1,Erbb4,Ets1,Fgf2,Fgfr1,Foxo1,Foxo3,Foxp1,Fubp1,Fzd1,Fzd5,Gabpa,Gli1,Gli3,Gon4l,Grem1,Grem2,Gzf1,Hexim1,Hipk2,Hist1h1e,Hr,Igf1,Igf1r,Ikzf2,Il33,Inhba,Irf6,…
GO:0000375	RNA splicing, via transesterification reactions	9.9e-06	0.00233	10	826	Mouse	Cdk13,Celf2,Ddx17,Ddx5,Mbnl1,Pqbp1,Ptbp2,Sf3a2,Sfswap,Srsf10
GO:0009889	regulation of biosynthetic process	1.42e-05	0.00321	209	826	Mouse	Ablim1,Acvr2a,Adgrf5,Aebp2,Aff1,Ago1,Apobec1,Arnt,Ash1l,Atf6,Atf7ip,Atrx,Atxn1,Atxn7,Bmpr1a,Bmpr2,Brwd1,C1d,C1qbp,Cbfa2t2,Cbx1,Cbx5,Ccr2,Cdc73,Cdk6,Cflar,Chd8,Clock,Cnbp,Cnot6l,Creb1,Creb3l2,Crebbp,Crebl2,Crtc1,Ctdspl2,Ctnnb1,Cux1,Cyp1b1,Ddx5,Dmd,Dnajc1,Dnajc3,Dnmt1,Dnmt3a,Ecm1,Egln1,Entpd5,Erbb4,Ereg,Ets1,Fam129a,Fbxo18,Fech,Fgf2,Fgfr1,Foxo1,Foxo3,Foxp1,Fubp1,Fzd1,Fzd5,Gabpa,Gli1,Gli3,Gon4l,Grb1…
GO:0071495	cellular response to endogenous stimulus	1.99e-05	0.00432	63	826	Mouse	Acaca,Acvr2a,Adcy6,Adipor1,Atp1a2,Bmpr1a,Bmpr2,Col1a2,Col2a1,Col3a1,Col4a1,Cpeb4,Dnmt1,Dnmt3a,Efna5,Epb41l5,Erbb4,Fat4,Fbxo18,Fer,Fgfr1,Flrt2,Foxo1,Frs2,Hipk2,Igf1,Igf1r,Insr,Iqgap1,Itgb5,Itpr2,Kit,Klf9,Lepr,Ltbp3,Map3k1,Map3k7,Mmp3,Ndst1,Ngf,Nr3c1,Nsmf,Ntrk2,P2ry6,Pdgfra,Ppp1r9b,Ptges3,Ptpn11,Rdx,Rhoq,Rps6kb1,Ryr2,Sesn1,Sesn3,Smad5,Soga1,Stxbp4,Tusc5,Wwox,Xbp1,Yes1,Zeb1,Zfp106
GO:0071230	cellular response to amino acid stimulus	2.38e-05	0.00462	13	826	Mouse	Col1a2,Col3a1,Col4a1,Cpeb4,Dnmt1,Dnmt3a,Mmp3,Ntrk2,Pdgfra,Sesn1,Sesn3,Xbp1,Zeb1
GO:0044093	positive regulation of molecular function	2.43e-05	0.00462	70	826	Mouse	Abl2,Ace,Antxr1,Arhgef5,Arrb1,Bcl2l11,Cdc42,Cflar,Clock,Cnksr3,Crebbp,Crtc1,Csf1r,Cspg4,Ctnnb1,Cycs,Dab2ip,Dennd1a,Dmd,Dnajc10,Epb41l5,Ephb2,Ercc6,Ern1,Fgf14,Fgf2,Frs2,Fzd5,Gpr39,Gprc5b,Grem1,Hipk2,Hmbox1,Hspa2,Ikbkg,Iqgap1,Jmy,Kalrn,Krit1,Lfng,Lmf1,Lpar1,Lrp6,Lrrfip1,Lrrk2,Map3k1,Map3k5,Myo9b,Myocd,Ngf,Nipbl,Nox4,P2rx7,Pde5a,Picalm,Ptges3,Ptpn11,Ranbp2,Ripk1,Rock2,Sfrp2,Sh3glb1,Slc11a1,Sorl1,Tea…
GO:0000377	RNA splicing, via transesterification reactions with bulged adenosine as nucleophile	2.47e-05	0.00462	9	826	Mouse	Cdk13,Celf2,Ddx17,Ddx5,Mbnl1,Pqbp1,Ptbp2,Sf3a2,Sfswap
GO:0000398	mRNA splicing, via spliceosome	2.47e-05	0.00462	9	826	Mouse	Cdk13,Celf2,Ddx17,Ddx5,Mbnl1,Pqbp1,Ptbp2,Sf3a2,Sfswap
GO:2000145	regulation of cell motility	3.95e-05	0.00715	53	826	Mouse	Abhd2,Amotl1,Arhgap5,Arhgef2,Bcr,Braf,C3ar1,Carmil1,Ccbe1,Ccr2,Col18a1,Col3a1,Csf1r,Cxcl12,Cyp1b1,Dab2ip,Ecm1,Epb41l5,Erbb4,F2r,Fer,Fgf2,Gab2,Il1r1,Itgav,Lbp,Lmna,Lrig2,Lrp1,Map3k1,Mmp3,Mtus1,Myocd,Mysm1,Nipbl,Plk2,Plxna1,Plxna2,Ptprj,Sdc4,Sfrp2,Slc8b1,Slk,Spred1,Stap1,Stk10,Syne2,Thbs1,Tie1,Tirap,Tmsb4x,Trp53inp1,Unc5c
GO:0001944	vasculature development	4.7e-05	0.00822	62	826	Mouse	2410089E03Rik,Angpt2,Antxr1,Arid2,Bmpr1a,Bmpr2,C1galt1,Ccbe1,Ccr2,Cdh5,Col18a1,Col3a1,Ctnnb1,Cx3cl1,Cxcl12,Cyp1b1,Dync2h1,Ephb2,Fgf2,Fgfr1,Flt1,Foxo1,Fzd5,Gja5,Gjc1,Grem1,Hectd1,Igf1,Itgav,Itgb1,Jam3,Kat6a,Lrp1,Luzp1,Map3k3,Map3k7,Megf8,Mib1,Mkl2,Mmrn2,Myocd,Ndst1,Nedd4,Notch2,Ntrk2,Pbrm1,Pcnt,Pdgfa,Prrx1,Ptpn14,Ptprb,Ptprj,Qk,Rapgef1,Rnf213,Setd2,Sfrp2,Slc4a7,Smarca2,Sufu,Tie1,Xbp1
GO:0009968	negative regulation of signal transduction	6.52e-05	0.0108	79	826	Mouse	Arhgap44,Arrb1,Ash1l,Atxn1,Atxn7,Cbfa2t2,Clock,Cnksr3,Col2a1,Crebrf,Ctdspl2,Ctnnb1,Cx3cl1,Cyp26b1,Dab2ip,Dmd,Dyrk1a,Ecm1,Ephb2,Erbin,Fzd1,G3bp1,Glg1,Gli3,Gpr161,Grb10,Grem1,Grem2,Hipk3,Hyou1,Igf1,Igf1r,Ikbkg,Itga1,Kremen1,Lbh,Lfng,Limd1,Lmna,Lrp1,Lrrk2,Map3k7,Med13,Megf8,Mmp3,Mnt,Mosmo,Myocd,Ncor1,Nedd4,Nf2,Nlrc3,Nr3c1,Nup62,Otud4,Otud7b,P2rx7,Prnp,Ptgir,Ptprj,Rapgef1,Ripk1,Rnf152,Rps6kb1,Scai,Se…
GO:0071310	cellular response to organic substance	6.59e-05	0.0108	104	826	Mouse	Abca1,Acaca,Acvr2a,Adcy6,Adipor1,Ago2,Alpl,Atp1a2,Bcr,Bmpr1a,Bmpr2,Cdc42,Cdc42ep4,Cdc73,Col1a2,Col2a1,Col3a1,Col4a1,Cpeb4,Creb1,Crebbp,Csf1r,Cx3cl1,Dab2ip,Dnmt1,Dnmt3a,Efna5,Eif2ak2,Epb41l5,Erbb4,Ern1,Fat4,Fer,Fgfr1,Flrt2,Foxo1,Frs2,Gbp5,Grem2,Havcr2,Hipk2,Igf1,Igf1r,Il1r1,Il6st,Insr,Iqgap1,Itgb5,Itpr2,Kit,Klf9,Lbp,Lepr,Ltbp3,Map3k1,Map3k7,Mmp3,Ndst1,Ngf,Nr3c1,Nsmf,Ntrk2,P2rx7,P2ry6,Pdgfra,Ppp1r9…
GO:0009719	response to endogenous stimulus	7.54e-05	0.012	68	826	Mouse	Acaca,Acvr2a,Adcy6,Adipor1,Atp1a2,Bmpr1a,Bmpr2,Col1a2,Col2a1,Col3a1,Col4a1,Cpeb4,Creb1,Dnmt1,Dnmt3a,Efna5,Epb41l5,Erbb4,Fat4,Fbxo18,Fer,Fgfr1,Flrt2,Foxo1,Frs2,Hipk2,Igf1,Igf1r,Insr,Iqgap1,Itgb1,Itgb5,Itpr2,Kit,Klf9,Lepr,Ltbp3,Map3k1,Map3k7,Mmp3,Ncoa2,Ndst1,Ngf,Nr3c1,Nsmf,Ntrk2,P2ry6,Pdgfra,Ppp1r9b,Ptges3,Ptpn11,Rdx,Rhoq,Rps6kb1,Ryr2,Serpina3n,Sesn1,Sesn3,Smad5,Socs5,Soga1,Stxbp4,Tusc5,Wwox,Xbp1,Y…
GO:0072358	cardiovascular system development	7.85e-05	0.0122	63	826	Mouse	2410089E03Rik,Angpt2,Antxr1,Arid2,Bmpr1a,Bmpr2,C1galt1,Ccbe1,Ccr2,Cdh5,Col18a1,Col3a1,Ctnnb1,Cx3cl1,Cxcl12,Cyp1b1,Dync2h1,Ephb2,Fgf2,Fgfr1,Flt1,Foxo1,Foxp1,Fzd5,Gja5,Gjc1,Grem1,Hectd1,Igf1,Itgav,Itgb1,Jam3,Kat6a,Lrp1,Luzp1,Map3k3,Map3k7,Megf8,Mib1,Mkl2,Mmrn2,Myocd,Ndst1,Nedd4,Notch2,Ntrk2,Pbrm1,Pcnt,Pdgfa,Prrx1,Ptpn14,Ptprb,Ptprj,Qk,Rapgef1,Rnf213,Setd2,Sfrp2,Slc4a7,Smarca2,Sufu,Tie1,Xbp1
GO:0071229	cellular response to acid chemical	0.000129	0.0194	20	826	Mouse	Abca1,Acaca,Col1a2,Col3a1,Col4a1,Cpeb4,Dnmt1,Dnmt3a,Mmp3,Ngf,Ntrk2,P2ry6,Pdgfra,Rarg,Sesn1,Sesn3,Tead1,Xbp1,Yes1,Zeb1
GO:0009966	regulation of signal transduction	0.000133	0.0195	152	826	Mouse	Acvr2a,Ago1,Akap13,Arhgap44,Arhgef2,Arrb1,Ash1l,Atxn1,Atxn7,Axl,Bnip2,Braf,C2cd3,Cbfa2t2,Cdc42,Chsy1,Clock,Cnksr3,Col2a1,Col3a1,Crebrf,Csf1r,Cspg4,Ctdspl2,Ctnnb1,Cx3cl1,Cyp1b1,Cyp26b1,Dab2ip,Dmd,Dync2h1,Dyrk1a,Ecm1,Eif2ak2,Entpd5,Ephb2,Erbb4,Erbin,Ercc6,Ern1,Evc,F2r,Fgf2,Fgfr1,Frs2,Fzd1,Fzd5,G3bp1,Gfra2,Glg1,Gli3,Gpr161,Gpr39,Gprc5b,Grb10,Grem1,Grem2,Havcr2,Hipk3,Hyou1,Ift172,Igf1,Igf1r,Igsf9b,Ik…
GO:0006397	mRNA processing	0.00014	0.0195	11	826	Mouse	Ahcyl1,Cdk13,Celf2,Cstf2t,Ddx17,Ddx5,Mbnl1,Pqbp1,Ptbp2,Sf3a2,Sfswap
GO:0010648	negative regulation of cell communication	0.000144	0.0195	82	826	Mouse	Arhgap44,Arrb1,Ash1l,Atxn1,Atxn7,Braf,Cbfa2t2,Clock,Cnksr3,Col2a1,Crebrf,Ctdspl2,Ctnnb1,Cx3cl1,Cyp26b1,Dab2ip,Dmd,Dyrk1a,Ecm1,Ephb2,Erbin,Fzd1,G3bp1,Glg1,Gli3,Gpr161,Grb10,Grem1,Grem2,Hipk3,Hyou1,Igf1,Igf1r,Ikbkg,Itga1,Kalrn,Kremen1,Lbh,Lfng,Limd1,Lmna,Lrp1,Lrrk2,Map3k7,Med13,Megf8,Mmp3,Mnt,Mosmo,Myocd,Ncor1,Nedd4,Nf2,Nlrc3,Nr3c1,Nup62,Otud4,Otud7b,P2rx7,Prnp,Ptgir,Ptpn11,Ptprj,Rapgef1,Ripk1,Rnf1…
GO:0023057	negative regulation of signaling	0.000144	0.0195	82	826	Mouse	Arhgap44,Arrb1,Ash1l,Atxn1,Atxn7,Braf,Cbfa2t2,Clock,Cnksr3,Col2a1,Crebrf,Ctdspl2,Ctnnb1,Cx3cl1,Cyp26b1,Dab2ip,Dmd,Dyrk1a,Ecm1,Ephb2,Erbin,Fzd1,G3bp1,Glg1,Gli3,Gpr161,Grb10,Grem1,Grem2,Hipk3,Hyou1,Igf1,Igf1r,Ikbkg,Itga1,Kalrn,Kremen1,Lbh,Lfng,Limd1,Lmna,Lrp1,Lrrk2,Map3k7,Med13,Megf8,Mmp3,Mnt,Mosmo,Myocd,Ncor1,Nedd4,Nf2,Nlrc3,Nr3c1,Nup62,Otud4,Otud7b,P2rx7,Prnp,Ptgir,Ptpn11,Ptprj,Rapgef1,Ripk1,Rnf1…
GO:0008380	RNA splicing	0.000148	0.0195	10	826	Mouse	Cdk13,Celf2,Ddx17,Ddx5,Mbnl1,Pqbp1,Ptbp2,Sf3a2,Sfswap,Srsf10
GO:0051270	regulation of cellular component movement	0.000184	0.0237	55	826	Mouse	Abhd2,Amotl1,Arhgap5,Arhgef2,Bcr,Bmpr2,Braf,C3ar1,Carmil1,Ccbe1,Ccr2,Col18a1,Col3a1,Csf1r,Cxcl12,Cyp1b1,Dab2ip,Ecm1,Epb41l5,Erbb4,F2r,Fer,Fgf2,Gab2,Il1r1,Itgav,Lbp,Lmna,Lrig2,Lrp1,Map3k1,Megf8,Mmp3,Mtus1,Myocd,Mysm1,Nipbl,Plk2,Plxna1,Plxna2,Ptprj,Sdc4,Sfrp2,Slc8b1,Slk,Spred1,Stap1,Stk10,Syne2,Thbs1,Tie1,Tirap,Tmsb4x,Trp53inp1,Unc5c
GO:0040012	regulation of locomotion	0.000202	0.025	55	826	Mouse	Abhd2,Amotl1,Arhgap5,Arhgef2,Bcr,Bmpr2,Braf,C3ar1,Carmil1,Ccbe1,Ccr2,Col18a1,Col3a1,Csf1r,Cxcl12,Cyp1b1,Dab2ip,Ecm1,Epb41l5,Erbb4,F2r,Fer,Fgf2,Gab2,Il1r1,Itgav,Lbp,Lmna,Lrig2,Lrp1,Map3k1,Megf8,Mmp3,Mtus1,Myocd,Mysm1,Nipbl,Plk2,Plxna1,Plxna2,Ptprj,Sdc4,Sfrp2,Slc8b1,Slk,Spred1,Stap1,Stk10,Syne2,Thbs1,Tie1,Tirap,Tmsb4x,Trp53inp1,Unc5c
GO:0009893	positive regulation of metabolic process	0.000207	0.025	188	826	Mouse	Ablim1,Ace,Adgrf5,Aff1,Ago1,Ago2,Antxr1,Apobec1,Arnt,Arrb1,Ash1l,Atf6,Atrx,Atxn1,Atxn7,Bcl2l11,Bmpr1a,Bmpr2,Bnip2,Braf,C1qbp,Ccr2,Cdc42,Cdk6,Clock,Clu,Cnbp,Cnot6l,Creb1,Creb3l2,Crebbp,Crebl2,Crtc1,Csf1r,Cspg4,Ctnnb1,Cycs,Cyp26b1,Dab2ip,Ddx5,Dnajc3,Dyrk1a,Efna5,Egln1,Eif2ak2,Entpd5,Erbb4,Ercc6,Ereg,Ern1,Ets1,F2r,Fam129a,Fgf2,Fgfr1,Foxo1,Foxo3,Foxp1,Frs2,Fzd1,Fzd5,Gfra2,Gli1,Gli3,Gpr39,Gprc5b,Grem1…
GO:0043200	response to amino acid	0.000207	0.025	13	826	Mouse	Col1a2,Col3a1,Col4a1,Cpeb4,Dnmt1,Dnmt3a,Mmp3,Ntrk2,Pdgfra,Sesn1,Sesn3,Xbp1,Zeb1
GO:0010646	regulation of cell communication	0.000247	0.0289	171	826	Mouse	Acvr2a,Ago1,Akap13,Arhgap44,Arhgef2,Arrb1,Ash1l,Atp2a2,Atxn1,Atxn7,Axl,Bnip2,Braf,C2cd3,Cbfa2t2,Cdc42,Chsy1,Clock,Cnksr3,Col2a1,Col3a1,Creb1,Crebrf,Csf1r,Cspg4,Ctdspl2,Ctnnb1,Cx3cl1,Cyp1b1,Cyp26b1,Dab2ip,Dmd,Dync2h1,Dyrk1a,Ecm1,Efna5,Eif2ak2,Entpd5,Ephb2,Erbb4,Erbin,Ercc6,Ern1,Evc,F2r,Fgf2,Fgfr1,Frs2,Fzd1,Fzd5,G3bp1,Gfra2,Gja5,Glg1,Gli3,Gpr161,Gpr39,Gprc5b,Grb10,Grem1,Grem2,Gucy1b1,Havcr2,Hipk3,H…
GO:0001568	blood vessel development	0.00025	0.0289	56	826	Mouse	2410089E03Rik,Angpt2,Antxr1,Arid2,Bmpr1a,Bmpr2,C1galt1,Ccr2,Cdh5,Col18a1,Col3a1,Ctnnb1,Cx3cl1,Cxcl12,Cyp1b1,Dync2h1,Ephb2,Fgf2,Fgfr1,Flt1,Foxo1,Fzd5,Gja5,Gjc1,Grem1,Hectd1,Itgav,Itgb1,Jam3,Kat6a,Lrp1,Luzp1,Map3k3,Map3k7,Megf8,Mib1,Mkl2,Mmrn2,Myocd,Ndst1,Nedd4,Notch2,Ntrk2,Pbrm1,Pdgfa,Prrx1,Ptprb,Ptprj,Qk,Rapgef1,Rnf213,Setd2,Sfrp2,Sufu,Tie1,Xbp1
GO:0009653	anatomical structure morphogenesis	0.000268	0.0301	194	826	Mouse	2410089E03Rik,Abl2,Ablim1,Acan,Alms1,Alpl,Angpt2,Arhgef2,Arid2,Ash1l,Atp8b1,Atrx,Axl,Bcl2l11,Bmpr1a,Bmpr2,Braf,C1galt1,C2cd3,Ccbe1,Ccl11,Ccr2,Cdc42,Cdc73,Cflar,Chsy1,Cobl,Col11a2,Col18a1,Col27a1,Col2a1,Col3a1,Creb1,Csf1r,Ctnnb1,Cx3cl1,Cxcl12,Cyp1b1,Cyp26b1,Dab2ip,Dlc1,Dlg3,Dmd,Dst,Dync2h1,Efna5,Egln1,Enah,Epb41l5,Ephb2,Erbb4,Ereg,Ext1,Eya4,Fat1,Fat4,Fer,Fgf2,Fgfr1,Fgfrl1,Flrt2,Flt1,Fndc3b,Foxn3,F…
GO:0035239	tube morphogenesis	0.000275	0.0301	73	826	Mouse	Angpt2,Arid2,Bcl2l11,Bmpr1a,Bmpr2,C1galt1,C2cd3,Ccl11,Ccr2,Col18a1,Col3a1,Ctnnb1,Cx3cl1,Cxcl12,Cyp1b1,Dab2ip,Dlc1,Epb41l5,Ephb2,Fat4,Fgf2,Fgfr1,Flt1,Fzd5,Gja5,Gjc1,Gli3,Greb1l,Grem1,Gzf1,Hectd1,Ift172,Igf1,Itgb1,Jam3,Kat6a,Kdm5b,Kras,Lama5,Lrp1,Lrp6,Luzp1,Map3k7,Med12,Megf8,Mib1,Mkl2,Mmrn2,Myocd,Ncoa3,Nedd4,Nr3c1,Ntrk2,Pbrm1,Pbx1,Pdgfa,Pdgfra,Prrx1,Ptprb,Ptprj,Qk,Rnf213,Ryr2,Sdccag8,Setd2,Sfrp2,S…
GO:0016071	mRNA metabolic process	0.000277	0.0301	18	826	Mouse	Ago2,Ahcyl1,Apobec1,Cdk13,Celf2,Cnot6l,Cstf2t,Ddx17,Ddx5,Khsrp,Mbnl1,Mettl16,Pqbp1,Ptbp2,Sf3a2,Sfswap,Sp1,Zhx2
GO:0010604	positive regulation of macromolecule metabolic process	0.000296	0.0315	179	826	Mouse	Ablim1,Ace,Aff1,Ago1,Ago2,Antxr1,Apobec1,Arnt,Arrb1,Ash1l,Atf6,Atrx,Atxn1,Atxn7,Bcl2l11,Bmpr1a,Bmpr2,Bnip2,Braf,C1qbp,Ccr2,Cdc42,Cdk6,Clock,Clu,Cnbp,Cnot6l,Creb1,Creb3l2,Crebbp,Crebl2,Crtc1,Csf1r,Cspg4,Ctnnb1,Cycs,Cyp26b1,Dab2ip,Ddx5,Dnajc3,Dyrk1a,Efna5,Egln1,Eif2ak2,Erbb4,Ercc6,Ereg,Ern1,Ets1,F2r,Fam129a,Fgf2,Fgfr1,Foxo1,Foxo3,Foxp1,Frs2,Fzd1,Fzd5,Gfra2,Gli1,Gli3,Gpr39,Gprc5b,Grem1,Havcr2,Hfe,Hi…
GO:0010033	response to organic substance	0.000306	0.0319	128	826	Mouse	Abca1,Acaca,Acvr2a,Adcy6,Adipor1,Ago2,Alpl,Atp1a2,Atrx,Bcr,Bmpr1a,Bmpr2,Cdc42,Cdc42ep4,Cdc73,Cdk6,Col1a2,Col2a1,Col3a1,Col4a1,Cpeb4,Creb1,Crebbp,Csf1r,Cx3cl1,Dab2ip,Dnajc10,Dnmt1,Dnmt3a,Edem3,Efna5,Eif2ak2,Epb41l5,Erbb4,Ern1,F2r,Fat4,Fer,Fgfr1,Flrt2,Foxo1,Frs2,Gbp5,Gpam,Grem2,Havcr2,Hipk2,Hnrnpa0,Igf1,Igf1r,Il1r1,Il6st,Ildr2,Insr,Iqgap1,Itgav,Itgb1,Itgb5,Itpr2,Kalrn,Kit,Klf9,Lbp,Lepr,Lrp6,Ltbp3,M…
GO:0070988	demethylation	0.000364	0.0372	9	826	Mouse	Apobec1,Fto,Kdm4c,Kdm5a,Kdm5b,Kdm5c,Kdm7a,Tet2,Tet3
GO:0048585	negative regulation of response to stimulus	0.000383	0.0385	97	826	Mouse	Arhgap44,Arrb1,Ash1l,Atxn1,Atxn7,Bcr,Cbfa2t2,Ccr2,Cd300a,Clock,Cnksr3,Col2a1,Crebrf,Ctdspl2,Ctnnb1,Cx3cl1,Cyp26b1,Dab2ip,Dmd,Dnajc3,Dyrk1a,Ecm1,Ephb2,Erbin,Ets1,Fbxo18,Fer,Fzd1,G3bp1,Glg1,Gli3,Gpr161,Gpr17,Grb10,Grem1,Grem2,Havcr2,Hipk3,Hyou1,Igf1,Igf1r,Ikbkg,Itga1,Kremen1,Lbh,Lfng,Limd1,Lmna,Lrig2,Lrp1,Lrrk2,Map3k7,Med13,Megf8,Mmp3,Mnt,Mosmo,Myocd,Ncor1,Nedd4,Neo1,Nf2,Nlrc3,Nr3c1,Nup62,Otud4,Otu…
GO:1901699	cellular response to nitrogen compound	0.00039	0.0385	34	826	Mouse	Adcy6,Ago2,Atrx,Col1a2,Col3a1,Col4a1,Cpeb4,Dnmt1,Dnmt3a,Fer,Foxo1,Igf1,Igf1r,Insr,Itpr2,Map3k5,Mmp3,Ntrk2,P2rx7,Pdgfra,Ppp1r9b,Rhoq,Rps6kb1,Ryr2,Sesn1,Sesn3,Soga1,Stxbp4,Thbs1,Tusc5,Xbp1,Zc3hav1,Zeb1,Zfp106
GO:0031324	negative regulation of cellular metabolic process	0.000423	0.041	130	826	Mouse	Aebp2,Apobec1,Arrb1,Ash1l,Atf7ip,Atrx,Atxn1,Atxn7,Bcr,C1d,Cbfa2t2,Cbx1,Cbx5,Cdc73,Cdk6,Cflar,Chd8,Clock,Cnksr3,Cnot6l,Crebbp,Ctdsp2,Ctnnb1,Cux1,Dab2ip,Dmd,Dnajc3,Dnmt1,Dnmt3a,Dyrk1a,Ephb2,Fam129a,Fbxo18,Fgfr1,Foxp1,Fzd1,Gabpa,Glg1,Gli3,Gon4l,Grb10,Grem1,Gzf1,Hexim1,Hipk2,Hipk3,Hnrnpa0,Hnrnpa2b1,Hr,Igf1,Igf1r,Kat2b,Kdm4a,Kdm4c,Kdm5a,Kdm5b,Kdm5c,Klf12,Klf3,Kmt2d,Lepr,Lrig2,Lrrk2,Map3k7,Mecp2,Mettl1…
GO:0016569	covalent chromatin modification	0.000458	0.0436	24	826	Mouse	Ash1l,Dnmt3a,Kat2b,Kat6a,Kat6b,Kdm4c,Kdm5a,Kdm5b,Kdm5c,Kdm7a,Kmt2a,Kmt2b,Kmt2c,Kmt2d,Kmt5b,Mecp2,Nsd1,Pcgf3,Setd2,Setd5,Tet2,Ubr2,Usp7,Wdr82
GO:0070887	cellular response to chemical stimulus	0.000481	0.045	122	826	Mouse	Abca1,Abtb2,Acaca,Acvr2a,Adcy6,Adipor1,Ago2,Alpl,Arhgef5,Atp1a2,Atrx,Bcr,Bmpr1a,Bmpr2,Braf,Ccr2,Cdc42,Cdc42ep4,Cdc73,Col1a2,Col2a1,Col3a1,Col4a1,Cpeb4,Creb1,Crebbp,Csf1r,Csf3r,Cx3cl1,Cyp1b1,Dab2ip,Dnmt1,Dnmt3a,Efna5,Eif2ak2,Epb41l5,Erbb4,Ern1,Fat4,Fer,Fgfr1,Flrt2,Foxo1,Foxo3,Frs2,Gbp5,Gpr39,Grem2,Havcr2,Hipk2,Igf1,Igf1r,Il1r1,Il6st,Insr,Iqgap1,Itga1,Itgb5,Itpr2,Kit,Klf9,Lbp,Lepr,Ltbp3,Map3k1,Map3…
GO:0006325	chromatin organization	0.000498	0.0458	34	826	Mouse	Ash1l,Chd3,Ctnnb1,Dnmt3a,Hist1h1e,Kat2b,Kat6a,Kat6b,Kdm4c,Kdm5a,Kdm5b,Kdm5c,Kdm7a,Kmt2a,Kmt2b,Kmt2c,Kmt2d,Kmt5b,Mecp2,Nsd1,Pcgf3,Ptma,Rbbp4,Rif1,Setd2,Setd5,Setd7,Smarca2,Tet2,Ttf1,Ubr2,Ubtf,Usp7,Wdr82
GO:0023051	regulation of signaling	0.000526	0.0475	170	826	Mouse	Acvr2a,Ago1,Akap13,Arhgap44,Arhgef2,Arrb1,Ash1l,Atp2a2,Atxn1,Atxn7,Axl,Bnip2,Braf,C2cd3,Cbfa2t2,Cdc42,Chsy1,Clock,Cnksr3,Col2a1,Col3a1,Creb1,Crebrf,Csf1r,Cspg4,Ctdspl2,Ctnnb1,Cx3cl1,Cyp1b1,Cyp26b1,Dab2ip,Dmd,Dync2h1,Dyrk1a,Ecm1,Efna5,Eif2ak2,Entpd5,Ephb2,Erbb4,Erbin,Ercc6,Ern1,Evc,F2r,Fgf2,Fgfr1,Frs2,Fzd1,Fzd5,G3bp1,Gfra2,Gja5,Glg1,Gli3,Gpr161,Gpr39,Gprc5b,Grb10,Grem1,Grem2,Gucy1b1,Havcr2,Hipk3,H…
GO:0031325	positive regulation of cellular metabolic process	0.000534	0.0475	171	826	Mouse	Ablim1,Ace,Adgrf5,Aff1,Ago1,Ago2,Antxr1,Apobec1,Arnt,Arrb1,Ash1l,Atf6,Atrx,Atxn1,Atxn7,Bcl2l11,Bmpr1a,Bmpr2,Bnip2,Braf,C1qbp,Ccr2,Cdc42,Clock,Clu,Cnbp,Cnot6l,Creb1,Creb3l2,Crebbp,Crebl2,Crtc1,Csf1r,Cspg4,Ctnnb1,Cycs,Dab2ip,Ddx5,Dnajc3,Dyrk1a,Efna5,Egln1,Eif2ak2,Entpd5,Erbb4,Ercc6,Ereg,Ern1,Ets1,F2r,Fam129a,Fgf2,Fgfr1,Foxo1,Foxo3,Foxp1,Frs2,Fzd1,Fzd5,Gfra2,Gli1,Gli3,Gpr39,Gprc5b,Grem1,Havcr2,Hipk2…
GO:0043030	regulation of macrophage activation	0.000551	0.0482	9	826	Mouse	Adgrf5,Cd200,Havcr2,Il33,Il4ra,Rora,Slc7a2,Stap1,Tnip2
GO:0048518	positive regulation of biological process	0.000567	0.0488	318	826	Mouse	Abca1,Ablim1,Ace,Adgrf5,Adgrl1,Aff1,Ago1,Ago2,Amotl1,Antxr1,Apobec1,Arhgap5,Arhgef2,Arnt,Arrb1,Ash1l,Atf6,Atrx,Atxn1,Atxn1l,Atxn7,Axl,Bcl2l11,Birc6,Bmpr1a,Bmpr2,Bnip2,Braf,C1qa,C1qbp,C3ar1,C4b,Carmil1,Ccbe1,Ccl11,Ccr2,Cd244,Cd300a,Cd300c2,Cd38,Cdc42,Cdk6,Cfh,Cflar,Chsy1,Clock,Clu,Cmklr1,Cnbp,Cnksr3,Cnot6l,Cobl,Col18a1,Col3a1,Creb1,Creb3l2,Crebbp,Crebl2,Crebrf,Crtc1,Csf1r,Cspg4,Ctdspl2,Ctnnb1,Cux1…
GO:0050793	regulation of developmental process	0.000641	0.0543	189	826	Mouse	Ace,Adcy6,Adgrl1,Akap13,Alms1,Angpt2,Arhgap44,Arhgef2,Atxn1,Atxn1l,Bcl2l11,Bcr,Bmpr1a,Bmpr2,Bnip2,Braf,Btbd7,C3ar1,Cacna1c,Carmil1,Ccbe1,Ccl11,Ccl9,Ccr2,Cdc42,Cdk12,Cdk13,Cdk6,Cflar,Clock,Cmklr1,Cobl,Col3a1,Creb1,Crebl2,Csf1r,Ctnnb1,Cux1,Cx3cl1,Cxcl12,Cyp1b1,Cyp26b1,Dab2ip,Ddx5,Efna5,Egln1,Eif2ak2,Enpp1,Epb41l5,Ephb2,Erap1,Erbb4,Fat4,Fgf2,Fgfr1,Flrt2,Flt1,Fn1,Fndc3b,Foxo1,Foxp1,Frs2,Fto,Gabpa,Gas…
GO:0007169	transmembrane receptor protein tyrosine kinase signaling pathway	0.00078	0.0648	31	826	Mouse	Angpt2,Bmpr2,Csf1r,Cspg4,Dab2ip,Efna5,Ephb2,Ereg,Fat4,Fer,Fgfr1,Flrt2,Flt1,Foxo1,Frs2,Gfra1,Igf1,Insr,Iqgap1,Ndst1,Ngef,Ntrk2,Pdgfra,Ptpn11,Rapgef1,Socs5,Soga1,Stap1,Stxbp4,Sulf1,Zfp106
GO:0051173	positive regulation of nitrogen compound metabolic process	0.000789	0.0648	165	826	Mouse	Ablim1,Ace,Aff1,Ago1,Ago2,Antxr1,Apobec1,Arnt,Arrb1,Ash1l,Atf6,Atrx,Atxn1,Atxn7,Bcl2l11,Bmpr1a,Bmpr2,Bnip2,Braf,C1qbp,Ccr2,Cdc42,Clock,Clu,Cnbp,Cnot6l,Creb1,Creb3l2,Crebbp,Crebl2,Crtc1,Csf1r,Cspg4,Ctnnb1,Cycs,Dab2ip,Ddx5,Dnajc3,Dyrk1a,Efna5,Egln1,Eif2ak2,Entpd5,Erbb4,Ercc6,Ereg,Ern1,Ets1,F2r,Fam129a,Fgf2,Fgfr1,Foxo1,Foxo3,Foxp1,Frs2,Fzd1,Fzd5,Gfra2,Gli1,Gli3,Gpr39,Gprc5b,Grem1,Havcr2,Hipk2,Hspa2,…
GO:0035295	tube development	0.000834	0.0669	89	826	Mouse	Angpt2,Arid2,Atrx,Atxn1l,Bcl2l11,Bmpr1a,Bmpr2,C1galt1,C2cd3,Cbfa2t2,Ccbe1,Ccl11,Ccr2,Col18a1,Col3a1,Creb1,Ctnnb1,Cux1,Cx3cl1,Cxcl12,Cyp1b1,Dab2ip,Dlc1,Epb41l5,Ephb2,Fat4,Fgf2,Fgfr1,Flt1,Fndc3b,Fzd5,Gja5,Gjc1,Gli3,Greb1l,Grem1,Gzf1,Hectd1,Ift172,Igf1,Itgb1,Jam3,Kat6a,Kdm5b,Kit,Kras,Lama5,Lrp1,Lrp6,Ltbp3,Luzp1,Map3k7,Med12,Megf8,Mib1,Mkl2,Mmrn2,Myocd,Ncoa3,Ncor2,Nedd4,Nfia,Notch2,Nr3c1,Ntrk2,Numa1,…
GO:0051172	negative regulation of nitrogen compound metabolic process	0.000847	0.0669	122	826	Mouse	Aebp2,Apobec1,Arrb1,Ash1l,Atf7ip,Atrx,C1d,Cbfa2t2,Cbx1,Cbx5,Cdc73,Cdk6,Cflar,Chd8,Clock,Cnksr3,Cnot6l,Crebbp,Ctdsp2,Ctnnb1,Cux1,Dab2ip,Dmd,Dnajc3,Dnmt1,Dnmt3a,Dyrk1a,Ephb2,Fam129a,Fbxo18,Fgfr1,Foxp1,Fzd1,Gabpa,Glg1,Gli3,Gon4l,Grem1,Gzf1,Hexim1,Hipk2,Hipk3,Hnrnpa0,Hnrnpa2b1,Hr,Igf1,Igf1r,Kat2b,Kdm4a,Kdm4c,Kdm5a,Kdm5b,Kdm5c,Klf12,Klf3,Kmt2d,Lrig2,Lrrk2,Mecp2,Mettl16,Mllt6,Mxd4,Myef2,Naca,Ncoa2,Ncor…
GO:0010605	negative regulation of macromolecule metabolic process	0.000852	0.0669	130	826	Mouse	Ace,Aebp2,Aff2,Ago2,Apobec1,Arrb1,Ash1l,Atf7ip,Atrx,C1d,Cbfa2t2,Cbx1,Cbx5,Cdc42,Cdc73,Cdk6,Cflar,Chd8,Clock,Cnksr3,Cnot6l,Crebbp,Ctdsp2,Ctnnb1,Cux1,Dab2ip,Dmd,Dnajc3,Dnmt1,Dnmt3a,Dyrk1a,Ephb2,Fam129a,Fbxo18,Fgfr1,Foxp1,Fzd1,Gabpa,Glg1,Gli3,Gon4l,Grb10,Grem1,Gzf1,Hexim1,Hipk2,Hipk3,Hnrnpa0,Hnrnpa2b1,Hr,Igf1,Igf1r,Kat2b,Kdm4a,Kdm4c,Kdm5a,Kdm5b,Kdm5c,Khsrp,Klf12,Klf3,Kmt2b,Kmt2d,Lrig2,Lrrk2,Mecp2,Me…
GO:0031399	regulation of protein modification process	0.000899	0.0687	92	826	Mouse	Ace,Arnt,Arrb1,Ash1l,Bnip2,Braf,Cdc42,Cnksr3,Crebl2,Csf1r,Cspg4,Ctdsp2,Ctnnb1,Dab2ip,Dmd,Dnajc3,Dyrk1a,Efna5,Eif2ak2,Ephb2,Erbb4,Ercc6,Ern1,F2r,Fam129a,Fech,Fer,Fgf2,Frs2,Fzd1,Fzd5,Gfra2,Gpr39,Gprc5b,Grem1,Havcr2,Hipk3,Hspa2,Igf1,Igf1r,Ikbkg,Iqgap1,Itpkb,Kat2b,Kdm4a,Kdm4c,Kdm5a,Kmt2a,Kmt2b,Lpar1,Lrrk2,Map3k1,Map3k3,Map3k5,Mecp2,Mllt6,Myocd,Ncor1,Ncor2,Ndst1,Nf2,Ngf,Nlrc3,Nox4,Ntrk2,Nup62,Nupr1,P2…
GO:0080111	DNA demethylation	0.000913	0.0687	4	826	Mouse	Apobec1,Fto,Tet2,Tet3
GO:0006376	mRNA splice site selection	0.000913	0.0687	4	826	Mouse	Celf2,Mbnl1,Ptbp2,Sfswap
GO:1902531	regulation of intracellular signal transduction	0.00103	0.0763	82	826	Mouse	Ago1,Arhgap44,Arhgef2,Arrb1,Ash1l,Axl,Bnip2,Braf,Cdc42,Cnksr3,Col3a1,Csf1r,Cspg4,Ctnnb1,Cyp1b1,Dab2ip,Dmd,Dyrk1a,Eif2ak2,Entpd5,Ephb2,Erbb4,Erbin,Ercc6,Ern1,F2r,Fgf2,Frs2,Fzd5,Gfra2,Gpr39,Gprc5b,Grem1,Havcr2,Hipk3,Hyou1,Igf1,Igf1r,Ikbkg,Itpkb,Lpar1,Lrrk2,Map3k1,Map3k3,Map3k5,Mmp3,Ncam1,Ncor1,Ndst1,Nf2,Nfat5,Ngf,Nlrc3,Nox4,Ntrk2,Nup62,Otud7b,P2rx7,Pde5a,Prnp,Ptpn11,Ptprj,Rapgef1,Rictor,Ripk1,Rnf15…
GO:0016525	negative regulation of angiogenesis	0.00106	0.0763	11	826	Mouse	Angpt2,Ccr2,Ctnnb1,Dab2ip,Krit1,Plk2,Spred1,Tcf4,Thbs1,Thbs2,Tie1
GO:2000181	negative regulation of blood vessel morphogenesis	0.00106	0.0763	11	826	Mouse	Angpt2,Ccr2,Ctnnb1,Dab2ip,Krit1,Plk2,Spred1,Tcf4,Thbs1,Thbs2,Tie1
GO:0007167	enzyme linked receptor protein signaling pathway	0.00114	0.0812	43	826	Mouse	Acvr2a,Angpt2,Bmpr1a,Bmpr2,Csf1r,Cspg4,Dab2ip,Efna5,Ephb2,Ereg,Fat4,Fer,Fgfr1,Flrt2,Flt1,Foxo1,Frs2,Gfra1,Hipk2,Igf1,Insr,Iqgap1,Itgb5,Jade2,Lnpep,Ltbp3,Map3k1,Map3k7,Ndst1,Ngef,Ntrk2,Pdgfra,Ptpn11,Rapgef1,Ryr2,Smad5,Socs5,Soga1,Sptbn1,Stap1,Stxbp4,Sulf1,Zfp106
GO:0060349	bone morphogenesis	0.00121	0.0853	15	826	Mouse	Alpl,Chsy1,Col27a1,Col2a1,Foxn3,Glg1,Gli3,Hspg2,Lrp6,Ltbp3,Rarg,Sfrp2,Sfrp4,Thbs1,Trip11
GO:0048583	regulation of response to stimulus	0.00125	0.087	198	826	Mouse	Acvr2a,Ago1,Akap13,Arhgap44,Arhgef2,Arrb1,Ash1l,Atp2a2,Atxn1,Atxn7,Axl,Bcr,Bmpr2,Bnip2,Braf,C1qa,C2cd3,C3ar1,C4b,Cbfa2t2,Ccr2,Cd300a,Cdc42,Cfh,Chsy1,Clock,Cnksr3,Col2a1,Col3a1,Crebrf,Csf1r,Cspg4,Ctdspl2,Ctnnb1,Cx3cl1,Cxcl12,Cyp1b1,Cyp26b1,Dab2ip,Dmd,Dnajc3,Dync2h1,Dyrk1a,Ecm1,Efna5,Eif2ak2,Entpd5,Ephb2,Erbb4,Erbin,Ercc6,Ereg,Ern1,Ets1,Evc,F2r,Fbxo18,Fech,Fer,Fgf2,Fgfr1,Frs2,Fzd1,Fzd5,G3bp1,Gab2,G…
GO:0030036	actin cytoskeleton organization	0.0013	0.0889	30	826	Mouse	Abl2,Arhgef5,Cdc42,Cflar,Cobl,Dlc1,Enah,Epb41l5,Fat1,Fer,Flii,Gas7,Itgb1,Itgb5,Jmy,Ldb3,Marcks,Mef2a,Mical2,Ophn1,Pdgfa,Ppp1r9b,Rflnb,Rhoq,Rhou,Specc1l,Tln1,Tmod3,Trpm7,Xirp1
GO:0051253	negative regulation of RNA metabolic process	0.00132	0.0889	82	826	Mouse	Aebp2,Apobec1,Atf7ip,Atrx,C1d,Cbfa2t2,Cbx1,Cbx5,Cdc73,Cdk6,Chd8,Clock,Ctnnb1,Cux1,Dnmt1,Dnmt3a,Dyrk1a,Fgfr1,Foxp1,Fzd1,Gabpa,Gli3,Gon4l,Grem1,Gzf1,Hexim1,Hipk2,Hnrnpa0,Hnrnpa2b1,Hr,Kdm5a,Kdm5b,Kdm5c,Klf12,Klf3,Kmt2d,Mecp2,Mxd4,Myef2,Naca,Ncoa2,Ncor1,Ncor2,Nedd4,Nfix,Nfx1,Noct,Notch2,Nrip1,Nsd1,Otud7b,Pkig,Prrx1,Ptbp3,Purb,Rarg,Rest,Rif1,Rreb1,Sin3a,Skil,Slc11a1,Smad5,Sox5,Sox6,Srsf10,Sufu,Tbl1xr1…
GO:0043170	macromolecule metabolic process	0.00137	0.0889	195	826	Mouse	Abca1,Abl2,Abraxas2,Acan,Acvr2a,Aff1,Ago1,Ago2,Ahcyl1,Apobec1,Arrb1,Ash1l,Atrx,Braf,C1galt1,C1qa,C2cd3,C4b,Camk2d,Cdk13,Cdkal1,Celf2,Cep63,Clk4,Clock,Cnot6l,Col2a1,Col4a2,Cpe,Csf1r,Cstf2t,Ctdspl2,Cttnbp2nl,Dab2ip,Dclre1c,Dcn,Ddx17,Ddx5,Dis3l2,Dmd,Dnajc10,Dnajc3,Dnmt1,Dnmt3a,Dolpp1,Dusp3,Dync2h1,Dyrk1a,Edem3,Eif2ak2,Endov,Entpd5,Ephb2,Erap1,Erbb4,Ercc4,Ercc6,Ern1,Ext1,Fancc,Fbxo18,Fer,Foxo3,Foxp1,…
GO:0086001	cardiac muscle cell action potential	0.00139	0.0889	6	826	Mouse	Cacna1d,Dmd,Gja5,Kcnj2,Ryr2,Scn1b
GO:0051568	histone H3-K4 methylation	0.00139	0.0889	6	826	Mouse	Ash1l,Kmt2a,Kmt2b,Kmt2d,Tet2,Wdr82
GO:0032233	positive regulation of actin filament bundle assembly	0.00139	0.0889	6	826	Mouse	Braf,Carmil1,Epha1,Lpar1,Sh3pxd2b,Synpo
GO:1901343	negative regulation of vasculature development	0.00139	0.0889	11	826	Mouse	Angpt2,Ccr2,Ctnnb1,Dab2ip,Krit1,Plk2,Spred1,Tcf4,Thbs1,Thbs2,Tie1
GO:0033500	carbohydrate homeostasis	0.00149	0.0919	22	826	Mouse	Adgrf5,Adipor1,Alms1,Cacna1c,Foxo1,Foxo3,Gk,Gpr39,Gprc5b,Igf1,Igf1r,Lepr,Mbd5,Ncor2,Pde3b,Ptpn11,Rab11fip2,Sesn3,Sidt2,Sin3a,Vcam1,Xbp1
GO:0042593	glucose homeostasis	0.00149	0.0919	22	826	Mouse	Adgrf5,Adipor1,Alms1,Cacna1c,Foxo1,Foxo3,Gk,Gpr39,Gprc5b,Igf1,Igf1r,Lepr,Mbd5,Ncor2,Pde3b,Ptpn11,Rab11fip2,Sesn3,Sidt2,Sin3a,Vcam1,Xbp1
GO:0009100	glycoprotein metabolic process	0.00149	0.0919	22	826	Mouse	Acan,C1galt1,Col2a1,Dcn,Dolpp1,Edem3,Entpd5,Ext1,Galnt1,Ganab,Hs6st2,Igf1,Large1,Lfng,Lmf1,Manba,Mgat5,St3gal1,St3gal2,Sulf1,Tet2,Trip11
GO:0051347	positive regulation of transferase activity	0.00163	0.0996	30	826	Mouse	Ace,Cdc42,Csf1r,Cspg4,Ctnnb1,Dab2ip,Ercc6,Ern1,Fgf2,Frs2,Fzd5,Gpr39,Gprc5b,Grem1,Ikbkg,Iqgap1,Lpar1,Map3k1,Map3k5,Nox4,P2rx7,Pde5a,Ptges3,Ptpn11,Ranbp2,Sh3glb1,Slc11a1,Sorl1,Tead1,Zeb2

## Sheet: Cellular_component
TermID	Term	P	Q	k	n	Query set	Gene symbols
GO:0005737	cytoplasm	1.47e-23	1.43e-20	1957	3256	Common	0610009O20Rik,1110008F13Rik,1190002N15Rik,1700021F05Rik,2010107E04Rik,2310061I04Rik,2410015M20Rik,3110043O21Rik,4833439L19Rik,8430408G22Rik,AI464131,Aars2,Aass,Aatf,Abat,Abca3,Abca5,Abcb10,Abcb6,Abcb7,Abcb8,Abcc9,Abcd1,Abcd3,Abcd4,Abcf2,Abhd10,Abhd11,Abhd12,Abhd13,Abhd17b,Abhd5,Abhd6,Abr,Acaa1a,Acaa2,Acacb,Acad11,Acad8,Acad9,Acadl,Acadm,Acads,Acadvl,Acat1,Acly,Aco2,Acot13,Acot7,Acot8,Acot9,Acp1,A…
GO:0044444	cytoplasmic part	5.1e-23	2.48e-20	1525	3256	Common	0610009O20Rik,1110008F13Rik,1190002N15Rik,1700021F05Rik,2010107E04Rik,2310061I04Rik,2410015M20Rik,8430408G22Rik,AI464131,Aars2,Aass,Abat,Abca3,Abca5,Abcb10,Abcb6,Abcb7,Abcb8,Abcc9,Abcd1,Abcd3,Abcd4,Abcf2,Abhd10,Abhd11,Abhd12,Abhd13,Abhd17b,Abhd5,Abhd6,Abr,Acaa1a,Acaa2,Acacb,Acad11,Acad8,Acad9,Acadl,Acadm,Acads,Acadvl,Acat1,Acly,Aco2,Acot13,Acot7,Acot8,Acot9,Acp1,Acp2,Acp6,Acsl4,Acsl5,Acss1,Acta2,…
GO:0005622	intracellular	7.75e-21	2.39e-18	2608	3256	Common	0610009O20Rik,1110008F13Rik,1190002N15Rik,1700021F05Rik,2010107E04Rik,2310061I04Rik,2410015M20Rik,2700049A03Rik,3110043O21Rik,4833439L19Rik,8430408G22Rik,AI464131,Aars2,Aass,Aatf,Abat,Abca3,Abca5,Abcb10,Abcb6,Abcb7,Abcb8,Abcc9,Abcd1,Abcd3,Abcd4,Abcf2,Abhd10,Abhd11,Abhd12,Abhd13,Abhd17b,Abhd5,Abhd6,Abr,Abt1,Acaa1a,Acaa2,Acacb,Acad11,Acad8,Acad9,Acadl,Acadm,Acads,Acadvl,Acat1,Acin1,Acly,Aco2,Acot13…
GO:0044424	intracellular part	9.83e-21	2.39e-18	2590	3256	Common	0610009O20Rik,1110008F13Rik,1190002N15Rik,1700021F05Rik,2010107E04Rik,2310061I04Rik,2410015M20Rik,2700049A03Rik,3110043O21Rik,4833439L19Rik,8430408G22Rik,AI464131,Aars2,Aass,Aatf,Abat,Abca3,Abca5,Abcb10,Abcb6,Abcb7,Abcb8,Abcc9,Abcd1,Abcd3,Abcd4,Abcf2,Abhd10,Abhd11,Abhd12,Abhd13,Abhd17b,Abhd5,Abhd6,Abr,Abt1,Acaa1a,Acaa2,Acacb,Acad11,Acad8,Acad9,Acadl,Acadm,Acads,Acadvl,Acat1,Acin1,Acly,Aco2,Acot13…
GO:0043229	intracellular organelle	7.45e-15	1.45e-12	2212	3256	Common	0610009O20Rik,1110008F13Rik,1190002N15Rik,1700021F05Rik,2010107E04Rik,2310061I04Rik,2410015M20Rik,2700049A03Rik,3110043O21Rik,8430408G22Rik,AI464131,Aars2,Aass,Aatf,Abat,Abca3,Abca5,Abcb10,Abcb6,Abcb7,Abcb8,Abcc9,Abcd1,Abcd3,Abcd4,Abcf2,Abhd10,Abhd11,Abhd17b,Abhd5,Abhd6,Acaa1a,Acaa2,Acacb,Acad11,Acad8,Acad9,Acadl,Acadm,Acads,Acadvl,Acat1,Acin1,Acly,Aco2,Acot13,Acot8,Acot9,Acp2,Acp6,Acsl4,Acsl5,Ac…
GO:0043227	membrane-bounded organelle	1.56e-14	2.53e-12	1999	3256	Common	0610009O20Rik,1110008F13Rik,1190002N15Rik,1700021F05Rik,2010107E04Rik,2310061I04Rik,2410015M20Rik,3110043O21Rik,8430408G22Rik,AI464131,Aars2,Aass,Aatf,Abat,Abca3,Abca5,Abcb10,Abcb6,Abcb7,Abcb8,Abcd1,Abcd3,Abcd4,Abcf2,Abhd10,Abhd11,Abhd17b,Abhd6,Acaa1a,Acaa2,Acacb,Acad11,Acad8,Acad9,Acadl,Acadm,Acads,Acadvl,Acat1,Acin1,Acly,Aco2,Acot13,Acot8,Acot9,Acp2,Acp6,Acsl4,Acsl5,Acss1,Actl6a,Actn1,Acyp2,Ada…
GO:0043226	organelle	8.85e-13	1.19e-10	2305	3256	Common	0610009O20Rik,1110008F13Rik,1190002N15Rik,1700021F05Rik,2010107E04Rik,2310061I04Rik,2410015M20Rik,2700049A03Rik,3110043O21Rik,8430408G22Rik,AI464131,Aars2,Aass,Aatf,Abat,Abca3,Abca5,Abcb10,Abcb6,Abcb7,Abcb8,Abcc9,Abcd1,Abcd3,Abcd4,Abcf2,Abhd10,Abhd11,Abhd17b,Abhd5,Abhd6,Acaa1a,Acaa2,Acacb,Acad11,Acad8,Acad9,Acadl,Acadm,Acads,Acadvl,Acat1,Acin1,Acly,Aco2,Acot13,Acot8,Acot9,Acp2,Acp6,Acsl4,Acsl5,Ac…
GO:0043231	intracellular membrane-bounded organelle	9.79e-13	1.19e-10	1802	3256	Common	0610009O20Rik,1110008F13Rik,1700021F05Rik,2010107E04Rik,2310061I04Rik,2410015M20Rik,3110043O21Rik,8430408G22Rik,AI464131,Aars2,Aass,Aatf,Abat,Abca5,Abcb10,Abcb6,Abcb7,Abcb8,Abcd1,Abcd3,Abcd4,Abcf2,Abhd10,Abhd11,Abhd6,Acaa1a,Acaa2,Acacb,Acad11,Acad8,Acad9,Acadl,Acadm,Acads,Acadvl,Acat1,Acin1,Acly,Aco2,Acot13,Acot8,Acot9,Acp2,Acp6,Acsl4,Acsl5,Acss1,Actl6a,Acyp2,Adam10,Adam19,Adar,Adarb1,Adck1,Adck2…
GO:0005739	mitochondrion	1.61e-11	1.74e-09	632	3256	Common	0610009O20Rik,1110008F13Rik,1700021F05Rik,2010107E04Rik,2310061I04Rik,2410015M20Rik,8430408G22Rik,Aars2,Aass,Abat,Abcb10,Abcb6,Abcb7,Abcb8,Abcd1,Abcd3,Abcf2,Abhd10,Abhd11,Abhd6,Acaa1a,Acaa2,Acacb,Acad11,Acad8,Acad9,Acadl,Acadm,Acads,Acadvl,Acat1,Acly,Aco2,Acot13,Acot8,Acot9,Acp6,Acsl4,Acsl5,Acss1,Acyp2,Adck1,Adck2,Adck5,Adh1,Adhfe1,Adprhl2,Adsl,Afg1l,Afg3l1,Agk,Agpat4,Agpat5,Agps,Agtpbp1,Aifm2,Ak…
GO:1905368	peptidase complex	1.76e-09	1.71e-07	36	3256	Common	Afg3l1,Psma1,Psma2,Psma3,Psma4,Psma6,Psmb1,Psmb10,Psmb2,Psmb3,Psmb4,Psmb5,Psmb6,Psmb7,Psmb8,Psmb9,Psmc1,Psmc2,Psmc3,Psmc4,Psmc5,Psmc6,Psmd1,Psmd11,Psmd12,Psmd13,Psmd14,Psmd2,Psmd3,Psmd4,Psmd5,Psmd6,Psmd7,Psmd8,Psme4,Spg7
GO:1905369	endopeptidase complex	6.53e-09	5.29e-07	34	3256	Common	Psma1,Psma2,Psma3,Psma4,Psma6,Psmb1,Psmb10,Psmb2,Psmb3,Psmb4,Psmb5,Psmb6,Psmb7,Psmb8,Psmb9,Psmc1,Psmc2,Psmc3,Psmc4,Psmc5,Psmc6,Psmd1,Psmd11,Psmd12,Psmd13,Psmd14,Psmd2,Psmd3,Psmd4,Psmd5,Psmd6,Psmd7,Psmd8,Psme4
GO:0000502	proteasome complex	6.53e-09	5.29e-07	34	3256	Common	Psma1,Psma2,Psma3,Psma4,Psma6,Psmb1,Psmb10,Psmb2,Psmb3,Psmb4,Psmb5,Psmb6,Psmb7,Psmb8,Psmb9,Psmc1,Psmc2,Psmc3,Psmc4,Psmc5,Psmc6,Psmd1,Psmd11,Psmd12,Psmd13,Psmd14,Psmd2,Psmd3,Psmd4,Psmd5,Psmd6,Psmd7,Psmd8,Psme4
GO:0043209	myelin sheath	2.76e-08	2.06e-06	118	3256	Common	Aco2,Actr1a,Alb,Aldoa,Arf6,Ass1,Atp1a1,Atp1b1,Atp5b,Atp5f1,Atp5h,Atp6v1a,Atp6v1b2,Bcl2,Canx,Car13,Cct2,Cct3,Cct5,Ckb,Cltc,Cnp,Cnrip1,Cntn1,Cntnap1,Cox5a,Dlat,Dld,Dlg1,Dpysl2,Eef1a1,Ehd3,Eno2,Exoc4,Ezr,Fscn1,Gapdh,Gdi1,Glul,Gnao1,Gnb1,Gnb2,Gnb5,Got2,Gpi1,Hsp90aa1,Hspa5,Hspa8,Hspd1,Idh3a,Igsf8,Immt,Mbp,Mdh1,Mif,Mpdz,Mpp5,Napa,Napb,Napg,Ndrg1,Ndufa10,Ndufs1,Ndufv2,Nefh,Nefl,Nefm,Nfasc,Nme1,Nsf,Pacsi…
GO:0005829	cytosol	5.08e-08	3.53e-06	246	3256	Common	Abhd5,Abr,Acot7,Acp1,Adk,Agbl5,Agtpbp1,Ahcyl2,Ahr,Ajuba,Akr1a1,Aldh9a1,Ambra1,Anxa7,Apaf1,Apbb1ip,Arhgap10,Arl6,Arl6ip1,Asap1,Aspa,Aspscr1,Atg13,Atp6v1a,Atp6v1b2,Atp6v1e1,Atp6v1g1,Bad,Bag1,Bag6,Bak1,Bax,Bcat1,Bcl10,Bcl2,Bcl2l1,Bcl2l2,Bex3,Bid,Bloc1s2,Bloc1s4,Bloc1s5,Bloc1s6,Btbd3,Capn1,Capn2,Car13,Car3,Carm1,Cask,Casp1,Casp9,Cct2,Cct3,Cct4,Cct5,Cct7,Cct8,Cdc37,Cdk14,Cdk5,Cdkn1a,Cdkn1b,Cdo1,Ces1d,…
GO:0005768	endosome	6.58e-08	4.26e-06	120	3256	Common	Abca5,Abcb6,Abhd17b,Agtr1a,Appl1,Arf6,Arpc2,Astn1,Astn2,Atp6v0b,Atp6v0d1,Atp6v1e1,Bace1,Bloc1s6,Bok,Cd1d1,Cd74,Clcn3,Clec16a,Cln3,Commd1,Coro1a,Ctse,Cubn,Ddit3,Derl1,Derl2,Eea1,Epha4,Fgd2,Furin,Gpr107,H2-Ab1,H2-DMa,Hmgb1,Hrg,Hspa8,Inpp5f,Irgm1,Kdr,Lamp1,Lamtor3,Ldlr,Ldlrap1,Lgmn,M6pr,Map2k1,Mapk1,Mapk3,Mmgt1,Nbr1,Nipa1,Nipa2,Nmnat2,Npc1,Nrp1,Nsg1,Ntrk1,Numb,Ociad1,Pank1,Psd,Ptp4a1,Ptpn1,Rab11a,Ra…
GO:0044446	intracellular organelle part	8.08e-07	4.91e-05	876	3256	Common	2700049A03Rik,AI464131,Aatf,Abca3,Abcb10,Abcb7,Abcd1,Abcd3,Abcd4,Abhd17b,Acaa2,Acat1,Acin1,Acsl5,Acss1,Actl6a,Actn1,Actr10,Actr2,Adam8,Adar,Add3,Afg3l1,Ago3,Agpat4,Ahctf1,Ahi1,Ahr,Aif1,Ak1,Ak2,Akap6,Akap8,Akap8l,Akap9,Aldh3a2,Als2,Ambra1,Anapc10,Ankrd26,Anxa7,Ap1b1,Ap1g1,Ap1g2,Ap1m1,Ap3b1,Ap3b2,Ap4e1,Ap4m1,Ap4s1,Apc,Apex2,App,Arhgap35,Arid1a,Arid1b,Arl13b,Arl3,Arl6ip1,Armcx3,Arntl,Arpc1a,Arpc1b,A…
GO:1902494	catalytic complex	2.5e-06	0.000143	151	3256	Common	Actl6a,Afg3l1,Anapc10,Arid1a,Arid1b,Asb2,Ash2l,Atg13,Atg14,Atp1b1,Becn1,Bmi1,Brd4,Cacybp,Ccnd2,Cdk2,Cdkn2d,Cul1,Cul2,Cul7,Dlat,Dpf2,Dr1,Dynll1,Dynlrb1,Eea1,Eed,Ep300,Ercc1,Etfa,Etfdh,Ezh1,Ezh2,Fbxo25,Fbxw11,Fbxw8,Gclc,Gclm,Gna12,Gna13,Gnai3,Gnao1,Gnaq,Gnaz,Gpd1,Hdac11,Hdac2,Hdac3,Hdac5,Hdac7,Hdac8,Hdac9,Itpr1,Jarid2,Kat14,Kat2a,Kdm6a,Klhl2,Mbd2,Mta2,Mtf2,Ndufa9,Otulin,P3h3,P3h4,P4ha1,P4ha2,Paxip1…
GO:0022624	proteasome accessory complex	3.12e-06	0.000168	18	3256	Common	Psmc1,Psmc2,Psmc3,Psmc4,Psmc5,Psmc6,Psmd1,Psmd11,Psmd12,Psmd13,Psmd14,Psmd2,Psmd3,Psmd4,Psmd5,Psmd6,Psmd7,Psmd8
GO:0012505	endomembrane system	5.81e-06	0.000297	494	3256	Common	AI464131,Abca3,Abca5,Abcb6,Abcd4,Abhd17b,Actn1,Adam19,Adipoq,Agtr1a,Akap6,Akap9,Aldh3a2,Amph,Ankrd27,Anxa7,Ap1b1,Ap1g1,Ap1g2,Ap1m1,Ap2a1,Ap2m1,Ap3b1,Ap3b2,Ap4e1,Ap4m1,Ap4s1,Aplp1,Apob,App,Appl1,Arcn1,Arf6,Arl6ip1,Arpc2,Astn1,Astn2,Atl1,Atp2a3,Atp2c1,Atp6v0b,Atp6v0d1,Atp6v1e1,Atp7a,Azin2,B4galt1,Bace1,Bak1,Bax,Bcl2,Bcl2l1,Bcl9,Bdnf,Becn1,Bicd2,Bin1,Bloc1s6,Blzf1,Bok,Cacnb1,Cacybp,Cadm1,Calu,Canx,C…
GO:0005794	Golgi apparatus	7.51e-06	0.000365	147	3256	Common	Adam19,Akap9,Ap1b1,Ap1g1,Ap1g2,Ap1m1,Ap3b1,Ap3b2,Ap4e1,Ap4m1,Ap4s1,Aplp1,App,Arcn1,Atp2c1,Atp7a,Azin2,B4galt1,Bace1,Bcl9,Becn1,Bicd2,Blzf1,Bok,Cav1,Cd36,Cd74,Chpt1,Clasp2,Clip3,Cltb,Copb2,Coro7,Creg2,Cubn,Cul3,Emp2,Faim2,Fam20a,Fam20b,Fam20c,Fbxw7,Fgd1,Fgf7,Fkrp,Flna,Gabarap,Gabarapl2,Galnt2,Gas8,Gja1,Gkap1,Gnai3,Gnptg,Golga1,Golga3,Golga5,Golm1,Golph3,Gopc,Gorasp1,Gosr1,Grina,H2-Ab1,Ift20,Ift57,…
GO:0032991	protein-containing complex	2.35e-05	0.00109	618	3256	Common	Abhd12,Abhd6,Abt1,Actl6a,Actr10,Adam8,Afg3l1,Ago3,Ahi1,Ahr,Aimp1,Aimp2,Ajuba,Aldoa,Amigo1,Anapc10,Ankrd1,Ap2a1,Apbb1ip,Apc,Arid1a,Arid1b,Arl6ip1,Arnt2,Arntl,Arpc1a,Arpc1b,Arpc2,Asap1,Asb2,Ash2l,Atf1,Atg13,Atg14,Atp1b1,Atp2b4,Atp6v0c,Axin1,Baz2a,Bbs1,Bbs2,Bbs4,Bbs9,Becn1,Birc2,Bloc1s2,Bloc1s4,Bloc1s5,Bloc1s6,Bmf,Bmi1,Brd4,Btbd1,Bub1b,C3,Cacna1a,Cacna1b,Cacna1g,Cacnb1,Cacnb2,Cacnb3,Cacybp,Caprin1,C…
GO:0005740	mitochondrial envelope	2.77e-05	0.00122	128	3256	Common	Abcb10,Abcb7,Abcd3,Acaa2,Acat1,Acsl5,Afg3l1,Agpat4,Ak2,Aldh3a2,Apex2,Armcx3,Atp5b,Atp5f1,Atp5g1,Atp5h,Atp5j,Atxn3,Bak1,Bax,Bckdhb,Bcl2,Bcl2l1,Bcl2l2,Bdh1,Bid,Bok,Cidea,Cisd1,Cisd2,Cox15,Cox4i1,Cox5a,Cox6b1,Cox6c,Cox7a2,Cox7a2l,Cpt1a,Csde1,Cyb5b,Cyb5r3,Dhrs1,Diablo,Dnajc11,Dnajc15,Dnm1l,Eci1,Efhd1,Etfdh,Glud1,Got2,Gstk1,H2-Ke6,Hadh,Hadha,Hadhb,Herc2,Higd1a,Hmgcl,Hspd1,Idh2,Lpin1,Maob,Mccc1,Mgst1,M…
GO:0005773	vacuole	3.71e-05	0.00157	73	3256	Common	Abca5,Acp2,Atg16l1,Atg5,Atg9a,Atp6v0c,Atp6v1g1,Atraid,Becn1,Capn1,Capn2,Ccdc115,Cd1d1,Cd74,Clec16a,Cln3,Cln5,Ctns,Ctsb,Ctsl,Ctss,Dld,Epdr1,Gabarap,Galc,Gba,Gla,Gpc3,Gusb,H2-Aa,H2-DMa,Hrg,Irgm1,Lamp1,Ldlr,Lgmn,Lmbrd1,Map1lc3b,Milr1,Mst1r,Mt1,Mtmr2,Nbr1,Neu1,Npc1,Peg3,Plbd2,Plekhf1,Ppt1,Rab24,Rab7,Rnf13,Rnf19b,Scarb2,Slc35f6,Snap29,Sppl2a,Sqstm1,Srgn,Srpx,Stx4a,Syt11,Syt7,Tm6sf1,Tpp1,Ttc3,Ubqln1,Un…
GO:0031982	vesicle	4.24e-05	0.00172	303	3256	Common	1190002N15Rik,Abca3,Abca5,Abcb6,Abhd17b,Actn1,Adamts1,Agfg1,Agtr1a,Als2cl,Ambra1,Amotl2,Amph,Ankrd27,Anxa7,Ap2a1,Ap2m1,App,Appl1,Aqp1,Arcn1,Arf6,Arpc2,Arrdc4,Aspscr1,Astn1,Astn2,Atg14,Atp13a2,Atp6v0b,Atp6v0d1,Atp6v1e1,Atp7a,Axin1,Bace1,Bdnf,Becn1,Bicd2,Bloc1s6,Bok,Btk,Cadm1,Cadps,Capzb,Cask,Cav1,Cav2,Ccdc136,Cd1d1,Cd47,Cd74,Cd9,Cdc42ep2,Cdk16,Cemip,Clcn3,Clec16a,Cln3,Clta,Commd1,Coro1a,Crcp,Ctse,…
GO:0031966	mitochondrial membrane	7.22e-05	0.00281	118	3256	Common	Abcb10,Abcb7,Abcd3,Acaa2,Acat1,Acsl5,Afg3l1,Agpat4,Ak2,Aldh3a2,Apex2,Armcx3,Atp5b,Atp5f1,Atp5g1,Atp5h,Atp5j,Atxn3,Bak1,Bax,Bckdhb,Bcl2,Bcl2l1,Bcl2l2,Bdh1,Bid,Bok,Cisd1,Cisd2,Cox15,Cox4i1,Cox5a,Cox6b1,Cox6c,Cox7a2,Cox7a2l,Cpt1a,Csde1,Cyb5b,Cyb5r3,Dhrs1,Dnajc11,Dnajc15,Dnm1l,Eci1,Efhd1,Etfdh,Glud1,Got2,Gstk1,Hadh,Hadha,Hadhb,Herc2,Higd1a,Hmgcl,Hspd1,Idh2,Lpin1,Maob,Mccc1,Mgst1,Mpc1,Mpst,Mrps21,Mtx1…
GO:0031090	organelle membrane	7.6e-05	0.00284	240	3256	Common	AI464131,Abca3,Abcb10,Abcb7,Abcd1,Abcd3,Abhd17b,Acaa2,Acat1,Acsl5,Actn1,Afg3l1,Agpat4,Ak2,Akap6,Aldh3a2,Apex2,Arl13b,Arl6ip1,Armcx3,Aspscr1,Atg16l1,Atp13a2,Atp5b,Atp5f1,Atp5g1,Atp5h,Atp5j,Atp6v0c,Atp6v1g1,Atraid,Atxn3,Azin2,Bak1,Bax,Bckdhb,Bcl2,Bcl2l1,Bcl2l2,Bdh1,Bid,Bok,Cav1,Cav2,Ccdc136,Cd24a,Cemip,Cisd1,Cisd2,Clec16a,Cltb,Cmtm3,Cox15,Cox4i1,Cox5a,Cox6b1,Cox6c,Cox7a2,Cox7a2l,Cpt1a,Csde1,Cyb5b,C…
GO:0031410	cytoplasmic vesicle	8.46e-05	0.00304	282	3256	Common	1190002N15Rik,Abca3,Abca5,Abcb6,Abhd17b,Actn1,Adamts1,Agfg1,Agtr1a,Als2cl,Ambra1,Amotl2,Amph,Ankrd27,Ap2a1,Ap2m1,App,Appl1,Arcn1,Arf6,Arpc2,Astn1,Astn2,Atg14,Atp6v0b,Atp6v0d1,Atp6v1e1,Atp7a,Axin1,Bace1,Bdnf,Becn1,Bicd2,Bloc1s6,Bok,Btk,Cadm1,Cadps,Capzb,Cav1,Cav2,Ccdc136,Cd1d1,Cd74,Cdc42ep2,Cdk16,Cemip,Clcn3,Clec16a,Cln3,Clta,Commd1,Coro1a,Crcp,Ctse,Ctsl,Cubn,Dbh,Ddit3,Dennd4c,Derl1,Derl2,Dld,Dlg4…
GO:0005770	late endosome	9.11e-05	0.00305	35	3256	Common	Abca5,Cd1d1,Cd74,Cln3,Ddit3,Derl1,Derl2,H2-Ab1,H2-DMa,Hspa8,Irgm1,Lamp1,Lamtor3,Ldlr,Lgmn,M6pr,Map2k1,Mapk1,Mapk3,Nbr1,Nmnat2,Nsg1,Ntrk1,Rab34,Rab7,Rnf128,Rnf13,Slc31a1,Slc31a2,Slc9a6,Sppl2a,Stard3,Vps26b,Vps36,Vps41
GO:0045335	phagocytic vesicle	9.11e-05	0.00305	35	3256	Common	Ambra1,Atg14,Becn1,Cdc42ep2,Evl,Flnb,Fmnl1,Gsn,Hrg,Irgm1,Kif16b,Kif5b,Lamp1,Myo18a,Myo1c,Pik3c3,Rab34,Rab5a,Srgap2,Stx11,Stx4a,Stx6,Stxbp1,Stxbp2,Stxbp3,Syk,Syt11,Syt7,Unc13b,Unc93b1,Vamp3,Vamp4,Vim,Vps26b,Zyx
GO:0044429	mitochondrial part	9.81e-05	0.00318	142	3256	Common	Abcb10,Abcb7,Abcd3,Acaa2,Acat1,Acsl5,Acss1,Afg3l1,Agpat4,Ak2,Aldh3a2,Apex2,Armcx3,Atp5b,Atp5f1,Atp5g1,Atp5h,Atp5j,Atxn3,Bak1,Bax,Bckdhb,Bcl2,Bcl2l1,Bcl2l2,Bdh1,Bid,Bok,Cidea,Cisd1,Cisd2,Cox15,Cox4i1,Cox5a,Cox6b1,Cox6c,Cox7a2,Cox7a2l,Cpt1a,Cs,Csde1,Cyb5b,Cyb5r3,Dap3,Dhrs1,Diablo,Dlat,Dnajc11,Dnajc15,Dnm1l,Eci1,Efhd1,Elac2,Etfa,Etfdh,Gadd45gip1,Glud1,Got2,Gstk1,H2-Ke6,Hadh,Hadha,Hadhb,Herc2,Higd1a,…
GO:0044422	organelle part	0.000137	0.00429	967	3256	Common	2700049A03Rik,AI464131,Aatf,Abca3,Abcb10,Abcb7,Abcc9,Abcd1,Abcd3,Abcd4,Abhd17b,Acaa2,Acat1,Acin1,Acsl5,Acss1,Acta2,Actl6a,Actn1,Actr10,Actr2,Adam8,Adar,Add3,Afg3l1,Ago3,Agpat4,Ahctf1,Ahi1,Ahr,Aif1,Ak1,Ak2,Akap6,Akap8,Akap8l,Akap9,Aldh3a2,Aldoa,Als2,Ambra1,Anapc10,Ank2,Ankrd1,Ankrd26,Anxa7,Ap1b1,Ap1g1,Ap1g2,Ap1m1,Ap3b1,Ap3b2,Ap4e1,Ap4m1,Ap4s1,Apc,Apex2,App,Arhgap35,Arid1a,Arid1b,Arl13b,Arl3,Arl6ip…
GO:0031975	envelope	0.000202	0.00588	168	3256	Common	AI464131,Abcb10,Abcb7,Abcd3,Acaa2,Acat1,Acsl5,Afg3l1,Agpat4,Ak2,Akap6,Aldh3a2,Anxa7,Apex2,Armcx3,Atp5b,Atp5f1,Atp5g1,Atp5h,Atp5j,Atxn3,Bak1,Bax,Bckdhb,Bcl2,Bcl2l1,Bcl2l2,Bdh1,Bid,Bin1,Bok,Cacybp,Cbx3,Cidea,Cisd1,Cisd2,Cmtm3,Cox15,Cox4i1,Cox5a,Cox6b1,Cox6c,Cox7a2,Cox7a2l,Cpt1a,Csde1,Cyb5b,Cyb5r3,Cyhr1,Dhrs1,Diablo,Dnajc11,Dnajc15,Dnm1l,E2f5,Eci1,Efhd1,Etfdh,Glud1,Gmcl1,Got2,Gstk1,H2-Ke6,Hadh,Hadha…
GO:0031967	organelle envelope	0.000202	0.00588	168	3256	Common	AI464131,Abcb10,Abcb7,Abcd3,Acaa2,Acat1,Acsl5,Afg3l1,Agpat4,Ak2,Akap6,Aldh3a2,Anxa7,Apex2,Armcx3,Atp5b,Atp5f1,Atp5g1,Atp5h,Atp5j,Atxn3,Bak1,Bax,Bckdhb,Bcl2,Bcl2l1,Bcl2l2,Bdh1,Bid,Bin1,Bok,Cacybp,Cbx3,Cidea,Cisd1,Cisd2,Cmtm3,Cox15,Cox4i1,Cox5a,Cox6b1,Cox6c,Cox7a2,Cox7a2l,Cpt1a,Csde1,Cyb5b,Cyb5r3,Cyhr1,Dhrs1,Diablo,Dnajc11,Dnajc15,Dnm1l,E2f5,Eci1,Efhd1,Etfdh,Glud1,Gmcl1,Got2,Gstk1,H2-Ke6,Hadh,Hadha…
GO:0000407	phagophore assembly site	0.000214	0.00588	12	3256	Common	Atg12,Atg13,Atg5,Nbr1,Rab7,Rb1cc1,Sqstm1,Ulk1,Ulk2,Vmp1,Wipi1,Wipi2
GO:0005743	mitochondrial inner membrane	0.00022	0.00588	101	3256	Common	Abcb10,Abcb7,Abcd3,Acaa2,Acat1,Acsl5,Afg3l1,Ak2,Aldh3a2,Apex2,Atp5b,Atp5f1,Atp5g1,Atp5h,Atp5j,Bckdhb,Bdh1,Cox15,Cox4i1,Cox5a,Cox6b1,Cox6c,Cox7a2,Cox7a2l,Cpt1a,Csde1,Cyb5b,Cyb5r3,Dhrs1,Dnajc11,Dnajc15,Eci1,Efhd1,Etfdh,Glud1,Got2,Gstk1,Hadh,Hadha,Hadhb,Herc2,Higd1a,Hmgcl,Hspd1,Idh2,Maob,Mccc1,Mgst1,Mpc1,Mpst,Mrps21,Mtx1,Ndufa3,Ndufa4,Ndufa8,Ndufa9,Ndufb3,Ndufb4,Ndufb5,Ndufb7,Ndufc2,Nipsnap1,Noa1,Oc…
GO:0005839	proteasome core complex	0.000222	0.00588	15	3256	Common	Psma1,Psma2,Psma3,Psma4,Psma6,Psmb1,Psmb10,Psmb2,Psmb3,Psmb4,Psmb5,Psmb6,Psmb7,Psmb8,Psmb9
GO:0097708	intracellular vesicle	0.000224	0.00588	282	3256	Common	1190002N15Rik,Abca3,Abca5,Abcb6,Abhd17b,Actn1,Adamts1,Agfg1,Agtr1a,Als2cl,Ambra1,Amotl2,Amph,Ankrd27,Ap2a1,Ap2m1,App,Appl1,Arcn1,Arf6,Arpc2,Astn1,Astn2,Atg14,Atp6v0b,Atp6v0d1,Atp6v1e1,Atp7a,Axin1,Bace1,Bdnf,Becn1,Bicd2,Bloc1s6,Bok,Btk,Cadm1,Cadps,Capzb,Cav1,Cav2,Ccdc136,Cd1d1,Cd74,Cdc42ep2,Cdk16,Cemip,Clcn3,Clec16a,Cln3,Clta,Commd1,Coro1a,Crcp,Ctse,Ctsl,Cubn,Dbh,Ddit3,Dennd4c,Derl1,Derl2,Dld,Dlg4…
GO:0005764	lysosome	0.000306	0.00761	54	3256	Common	Abca5,Acp2,Atp6v1g1,Atraid,Capn1,Capn2,Ccdc115,Cd1d1,Cd74,Clec16a,Cln3,Cln5,Ctns,Ctsb,Ctsl,Ctss,Epdr1,Gabarap,Galc,Gba,Gla,Gpc3,Gusb,H2-Aa,H2-DMa,Hrg,Irgm1,Lamp1,Ldlr,Lgmn,Lmbrd1,Map1lc3b,Milr1,Mt1,Neu1,Npc1,Plbd2,Plekhf1,Ppt1,Rab7,Rnf13,Rnf19b,Scarb2,Slc35f6,Sppl2a,Sqstm1,Srgn,Syt11,Syt7,Tm6sf1,Tpp1,Unc93b1,Vps33a,Vps36
GO:0000323	lytic vacuole	0.000306	0.00761	54	3256	Common	Abca5,Acp2,Atp6v1g1,Atraid,Capn1,Capn2,Ccdc115,Cd1d1,Cd74,Clec16a,Cln3,Cln5,Ctns,Ctsb,Ctsl,Ctss,Epdr1,Gabarap,Galc,Gba,Gla,Gpc3,Gusb,H2-Aa,H2-DMa,Hrg,Irgm1,Lamp1,Ldlr,Lgmn,Lmbrd1,Map1lc3b,Milr1,Mt1,Neu1,Npc1,Plbd2,Plekhf1,Ppt1,Rab7,Rnf13,Rnf19b,Scarb2,Slc35f6,Sppl2a,Sqstm1,Srgn,Syt11,Syt7,Tm6sf1,Tpp1,Unc93b1,Vps33a,Vps36
GO:0005769	early endosome	0.00032	0.00761	48	3256	Common	Appl1,Atp6v0d1,Bok,Cd1d1,Cln3,Coro1a,Derl1,Derl2,Eea1,Epha4,Fgd2,Furin,Gpr107,H2-Ab1,Hmgb1,Inpp5f,Kdr,Ldlr,Ldlrap1,Map2k1,Mapk1,Mapk3,Mmgt1,Nipa1,Nipa2,Nrp1,Ntrk1,Numb,Ptpn1,Rab34,Rab5a,Rac1,Rcc2,Samd9l,Slc11a2,Slc9a6,Snx19,Snx20,Snx21,Tfrc,Vps11,Vps16,Vps18,Vps26a,Vps26b,Vps41,Wasf2,Wdfy1
GO:0005623	cell	0.000321	0.00761	3022	3256	Common	0610009O20Rik,1110008F13Rik,1190002N15Rik,1700021F05Rik,2010107E04Rik,2310061I04Rik,2410015M20Rik,2700049A03Rik,3110043O21Rik,4833439L19Rik,8430408G22Rik,AI464131,Aars2,Aass,Aatf,Abat,Abca3,Abca5,Abcb10,Abcb1a,Abcb6,Abcb7,Abcb8,Abcc3,Abcc4,Abcc9,Abcd1,Abcd3,Abcd4,Abcf2,Abhd10,Abhd11,Abhd12,Abhd13,Abhd17b,Abhd5,Abhd6,Abi1,Abr,Abt1,Acaa1a,Acaa2,Acacb,Acad11,Acad8,Acad9,Acadl,Acadm,Acads,Acadvl,Acat…
GO:0030424	axon	0.000332	0.00761	138	3256	Common	Adam22,Adgrl3,Alcam,Ank3,Ap1s1,Apc,App,Aqp1,Bace1,Bdnf,Boc,Bsn,Cadm1,Cdk5,Clcn3,Cntnap1,Coro1a,Ctnna2,Cxcr4,Dag1,Dagla,Dbn1,Dctn2,Dlg1,Dlg2,Dlg4,Dpysl2,Eea1,Epb41l3,Epha4,Exoc4,Exoc7,Fkbp15,Flna,Fmr1,Fscn1,Fxr1,Fzd3,Gap43,Gdpd5,Gpm6a,Gria1,Gsk3b,Hdac6,Homer1,Htt,Igsf8,Igsf9,Inpp5f,Katnb1,Kcna1,Kcna2,Kcna6,Kcnab2,Kcnc4,Kcnq3,Klc1,L1cam,Map3k12,Mapk8,Mapk8ip1,Mapt,Mbp,Mgll,Mical1,Mme,Myc,Mycbp2,Myh…
GO:0044464	cell part	0.000337	0.00761	3020	3256	Common	0610009O20Rik,1110008F13Rik,1190002N15Rik,1700021F05Rik,2010107E04Rik,2310061I04Rik,2410015M20Rik,2700049A03Rik,3110043O21Rik,4833439L19Rik,8430408G22Rik,AI464131,Aars2,Aass,Aatf,Abat,Abca3,Abca5,Abcb10,Abcb1a,Abcb6,Abcb7,Abcb8,Abcc3,Abcc4,Abcc9,Abcd1,Abcd3,Abcd4,Abcf2,Abhd10,Abhd11,Abhd12,Abhd13,Abhd17b,Abhd5,Abhd6,Abi1,Abr,Abt1,Acaa1a,Acaa2,Acacb,Acad11,Acad8,Acad9,Acadl,Acadm,Acads,Acadvl,Acat…
GO:0005730	nucleolus	0.000365	0.00806	62	3256	Common	Aatf,Acin1,Adar,Baz2a,Btd,Bysl,Carf,Ciapin1,Ctsl,Cul2,Ddx56,Dedd,Dhx33,Dhx9,Eif3l,Eri1,Exosc9,Fbl,Fbxw7,Gnl3,Gtf2h5,Ifi204,Itpr1,Jmjd6,Llph,Mdfic,Mybbp1a,N4bp1,Ncl,Nepro,Noc3l,Nol12,Nol6,Nolc1,Npm1,Nusap1,Oxr1,Pak1ip1,Parp1,Parp2,Polr1b,Polr1c,Polr1e,Pop5,Prkrip1,Pus1,Rasl11a,Rbm19,Rcl1,Rev3l,Rps19bp1,Rrs1,Rsl1d1,Rtf1,Senp3,Snu13,Taf1a,Taf1b,Tbp,Top2a,Wdr55,Zfp346
GO:0030139	endocytic vesicle	0.000388	0.00838	46	3256	Common	Ambra1,Atg14,Becn1,Cdc42ep2,Cubn,Egfr,Ehd3,Eps15,Evl,Flnb,Fmnl1,Gsn,Hrg,Inpp5f,Irgm1,Itsn1,Kif16b,Kif5b,Lamp1,Lmbrd1,Myo18a,Myo1c,Pik3c2b,Pik3c3,Plekhg5,Rab34,Rab5a,Rab5b,Rab5c,Srgap2,Stx11,Stx4a,Stx6,Stxbp1,Stxbp2,Stxbp3,Syk,Syt11,Syt7,Unc13b,Unc93b1,Vamp3,Vamp4,Vim,Vps26b,Zyx
GO:0019866	organelle inner membrane	0.000629	0.0133	107	3256	Common	Abcb10,Abcb7,Abcd3,Acaa2,Acat1,Acsl5,Afg3l1,Ak2,Aldh3a2,Apex2,Atp5b,Atp5f1,Atp5g1,Atp5h,Atp5j,Bckdhb,Bdh1,Cox15,Cox4i1,Cox5a,Cox6b1,Cox6c,Cox7a2,Cox7a2l,Cpt1a,Csde1,Cyb5b,Cyb5r3,Dhrs1,Dnajc11,Dnajc15,Eci1,Efhd1,Etfdh,Glud1,Got2,Gstk1,Hadh,Hadha,Hadhb,Herc2,Higd1a,Hmgcl,Hspd1,Idh2,Itpr1,Lbr,Lmnb1,Maob,Mccc1,Mgst1,Mpc1,Mpst,Mrps21,Mtx1,Ndufa3,Ndufa4,Ndufa8,Ndufa9,Ndufb3,Ndufb4,Ndufb5,Ndufb7,Ndufc2,…
GO:0048475	coated membrane	0.000803	0.0156	13	3256	Common	Ap2a1,Cltc,Dab2,Eps15,Eps15l1,Necap1,Pank1,Sec24b,Synj1,Vps11,Vps16,Vps18,Vps39
GO:1903561	extracellular vesicle	0.000803	0.0156	13	3256	Common	Aqp1,Arrdc4,Cd47,Cd9,Gars,Hspa8,Pdcd6ip,Prom1,Slc11a2,Slc2a4,Syt4,Tfrc,Tsg101
GO:0030117	membrane coat	0.000803	0.0156	13	3256	Common	Ap2a1,Cltc,Dab2,Eps15,Eps15l1,Necap1,Pank1,Sec24b,Synj1,Vps11,Vps16,Vps18,Vps39
GO:0099023	tethering complex	0.000803	0.0156	13	3256	Common	Exoc2,Exoc5,Myrip,Tgfbrap1,Trappc1,Trappc2,Trappc3,Trappc4,Vps11,Vps16,Vps18,Vps33a,Vps8
GO:0070062	extracellular exosome	0.00178	0.0339	9	3256	Common	Aqp1,Cd47,Cd9,Gars,Hspa8,Pdcd6ip,Slc2a4,Tfrc,Tsg101
GO:0044440	endosomal part	0.00206	0.0385	28	3256	Common	Abhd17b,Bok,Clec16a,Epha4,H2-DMa,Psd,Rab23,Rab7,Rac1,Rap2b,Rap2c,Rcc2,Rnf13,Slc9b2,Snap91,Snx19,Snx20,Snx21,Sppl2a,Tgfbrap1,Usp8,Vps11,Vps16,Vps18,Vps33a,Vps45,Vps8,Zdhhc2
GO:0043230	extracellular organelle	0.0033	0.0593	15	3256	Common	Aqp1,Arrdc4,Cd47,Cd9,Gars,Gbp2b,Gbp3,Hspa8,Pdcd6ip,Prom1,Slc11a2,Slc2a4,Syt4,Tfrc,Tsg101
GO:0005811	lipid droplet	0.0033	0.0593	15	3256	Common	Abhd5,Ces1d,Cidea,Dgat2,Irak1,Ldah,Lipe,Plin2,Prpf19,Rab7,Rbp1,Repin1,Rsad2,Spg20,Tmem135
GO:0005838	proteasome regulatory particle	0.00359	0.0635	8	3256	Common	Psmc1,Psmc5,Psmd11,Psmd12,Psmd13,Psmd2,Psmd3,Psmd7
GO:0030990	intraciliary transport particle	0.00398	0.0691	20	3256	Common	Cluap1,Ift122,Ift140,Ift20,Ift22,Ift27,Ift43,Ift46,Ift57,Ift74,Ift80,Ift81,Kif3a,Kifap3,Rabl2,Traf3ip1,Ttc21b,Ttc26,Wdr19,Wdr35
GO:0031984	organelle subcompartment	0.00526	0.0897	100	3256	Common	AI464131,Abcd4,Ap1b1,Ap1g1,Ap1g2,Ap1m1,Ap3b1,Ap3b2,Ap4e1,Ap4m1,Ap4s1,Arl6ip1,Atl1,Atp7a,Bace1,Bcl2,Becn1,Bok,Cept1,Cisd2,Clip3,Cltb,Creb3l1,Dgat2,Dpagt1,Ebp,Eda,Edem1,Eif2ak3,Elovl6,Fitm2,Flna,Gabarapl2,Golga1,Golga3,Golga5,Gosr1,H13,Herpud1,Hspa5,Itpr1,Jph3,Klhl41,Lpcat2,Lpin2,Lrmp,Lypla2,Man1a,Man1a2,Man2a1,Mia3,Nat8l,Nbea,Nmnat2,Pcsk1n,Pdzd8,Pigb,Pigf,Pigq,Pigt,Pml,Pomk,Prkd1,Ptdss1,Ptdss2,Ree…
GO:0015630	microtubule cytoskeleton	0.00544	0.0912	161	3256	Common	2700049A03Rik,Actr10,Ahi1,Akap9,Als2,Apc,App,Arhgap35,Arl3,Aspm,Atm,Axin1,Bbs1,Bbs4,Bcas3,Bccip,Brsk1,Camsap2,Cby1,Ccdc141,Ccser2,Cdk5rap2,Cenpf,Cenpj,Cep120,Cep152,Cep164,Cep170,Cep192,Cep250,Cep290,Cep57,Cep83,Cetn3,Clasp1,Clasp2,Clip2,Cluap1,Cntrl,Cpeb1,Csnk1a1,Cspp1,Cttn,Cyld,Cys1,Dctn1,Dctn3,Dlg5,Dnm1l,Dynll1,Dynlrb1,E4f1,Eml4,Ezr,Fam92a,Fbf1,Fez1,Fmn1,Fopnl,Gabarap,Gas8,H2afy,Haus2,Hdac6,Hs…
GO:0062023	collagen-containing extracellular matrix	4.79e-05	0.0107	22	763	Mouse	Acan,Col18a1,Col1a2,Col27a1,Col2a1,Col3a1,Col4a1,Col4a2,Efna5,Entpd1,Fn1,Hmcn2,Hspg2,Itgb4,Lama5,Lamc3,Matn2,Mmrn2,Smoc1,Thbs2,Tnc,Vwc2
GO:0031012	extracellular matrix	6.07e-05	0.0107	27	763	Mouse	Acan,Col18a1,Col1a2,Col27a1,Col2a1,Col3a1,Col4a1,Col4a2,Efna5,Entpd1,Fbln2,Fn1,Hmcn2,Hnrnpm,Hspg2,Itgb4,Lama5,Lamc3,Matn2,Mmrn2,Ptprz1,Smoc1,Sod3,Thbs1,Thbs2,Tnc,Vwc2
GO:0015629	actin cytoskeleton	6.68e-05	0.0107	34	763	Mouse	Abl2,Ablim1,Akap13,Arhgap32,Arhgef2,Carmil1,Cobl,Crk,Daam1,Dst,Enah,Gas2l1,Gas7,Kat2b,Lima1,Maea,Map3k1,Marcks,Med28,Myh9,Nf2,Ophn1,Peak1,Plekhh2,Ppp1r9b,Rdx,Rflnb,Rinl,Sh3pxd2b,Specc1l,Sptbn1,Synpo,Tmod3,Yes1
GO:0005604	basement membrane	7.27e-05	0.0107	19	763	Mouse	Acan,Col18a1,Col2a1,Col4a1,Col4a2,Efna5,Entpd1,Fn1,Hmcn2,Hspg2,Itgb4,Lama5,Lamc3,Matn2,Mmrn2,Smoc1,Thbs2,Tnc,Vwc2
GO:0005581	collagen trimer	9.64e-05	0.0113	8	763	Mouse	Col11a2,Col1a2,Col27a1,Col2a1,Col3a1,Col4a1,Col4a2,Col6a3
GO:0005634	nucleus	0.000137	0.0124	251	763	Mouse	2010111I01Rik,Abraxas2,Aebp2,Aff1,Aff2,Aff4,Ago1,Ago2,Ahnak,Alkbh1,Anapc1,Anp32e,Arid2,Arnt,Atf6,Atrx,Atxn1,Atxn7,Brd2,Brwd1,Btbd7,Camk2d,Cbx1,Cbx5,Cbx7,Ccnt1,Cdk13,Celf2,Chd2,Chd3,Chd4,Chd8,Clip1,Clk4,Clock,Cnbp,Cpeb4,Creb1,Creb5,Crebbp,Crebl2,Crebrf,Crtc1,Ctdspl2,Ctnnb1,Cux1,Dido1,Dnajc1,Dnmt1,Dnmt3a,Dst,Dyrk1a,Ep400,Ercc4,Ern1,Ets1,Evc2,Fgf14,Flt1,Foxo1,Foxo3,Foxp1,Fto,Gabpa,Gins4,Gk,Gli1,Gli3…
GO:0098644	complex of collagen trimers	0.000147	0.0124	6	763	Mouse	Col1a2,Col27a1,Col2a1,Col3a1,Col4a1,Col4a2
GO:0000785	chromatin	0.000184	0.0135	36	763	Mouse	Aff4,Alkbh1,Arid2,Atrx,Cbx1,Cbx5,Cbx7,Chd3,Chd4,Creb1,Crebbp,Ctnnb1,Dnmt1,Dnmt3a,Kdm4a,Kdm4c,Mau2,Mecp2,Mef2a,Myocd,Nipbl,Pbrm1,Plk2,Polr2a,Rarg,Rbbp4,Rfx3,Rif1,Sfr1,Smarca2,Smarce1,Sp1,Stag1,Trim28,Ubr2,Wapl
GO:0044428	nuclear part	0.000238	0.0155	98	763	Mouse	2010111I01Rik,Aebp2,Aff2,Alkbh1,Arid2,Atrx,Atxn1,Cbx5,Cbx7,Ccnt1,Cdk13,Chd3,Chd4,Clip1,Creb1,Crebbp,Crebrf,Ctnnb1,Dnmt3a,Dst,Ep400,Ercc4,Ern1,Gli3,Gtf2a1,Hipk2,Hipk3,Hmbox1,Hr,Hspa2,Itfg2,Itpr3,Kat2b,Kmt5b,Lmna,Med12,Med13,Med13l,Med20,Med28,Mef2a,Mki67,Mlh3,Mxd4,Myocd,Ncoa3,Ncor2,Nemp1,Nipbl,Nrip1,Numa1,Nup62,Pbrm1,Pcgf3,Phc3,Polr1a,Polr2a,Pqbp1,Ptbp2,Purb,Rad54l2,Rarg,Rbbp4,Rere,Rfx3,Rif1,Rnf6,…
GO:0044420	extracellular matrix component	0.00045	0.0265	11	763	Mouse	Col1a2,Col27a1,Col2a1,Col3a1,Col4a1,Col4a2,Entpd1,Fn1,Hspg2,Lama5,Ptprz1
GO:0098643	banded collagen fibril	0.000816	0.04	4	763	Mouse	Col1a2,Col27a1,Col2a1,Col3a1
GO:0005583	fibrillar collagen trimer	0.000816	0.04	4	763	Mouse	Col1a2,Col27a1,Col2a1,Col3a1
GO:0005654	nucleoplasm	0.000911	0.0412	39	763	Mouse	Aebp2,Aff2,Atrx,Cbx5,Ccnt1,Chd3,Chd4,Crebbp,Crebrf,Ep400,Ercc4,Gli3,Gtf2a1,Hipk2,Hipk3,Hr,Itfg2,Itpr3,Kat2b,Med12,Med13,Med13l,Med20,Med28,Ncor2,Nrip1,Pqbp1,Rad54l2,Rbbp4,Rnf6,Setd5,Smc6,Srsf10,Srsf2,Srsf5,Trim28,Trrap,Wrn,Zzz3
GO:0000775	chromosome, centromeric region	0.00111	0.0464	15	763	Mouse	Atrx,Cbx1,Cbx5,Crebbp,Dnmt1,Dnmt3a,Hjurp,Kat2b,Kdm4a,Kdm4c,Kmt5b,Mad1l1,Mki67,Pbrm1,Sin3a
GO:0044451	nucleoplasm part	0.00127	0.0496	34	763	Mouse	Aebp2,Aff2,Atrx,Cbx5,Ccnt1,Chd3,Chd4,Crebbp,Crebrf,Ep400,Ercc4,Gli3,Gtf2a1,Hipk2,Hipk3,Hr,Kat2b,Med12,Med13,Med13l,Med20,Med28,Ncor2,Nrip1,Pqbp1,Rad54l2,Rbbp4,Rnf6,Setd5,Smc6,Srsf2,Srsf5,Trrap,Zzz3
GO:0044427	chromosomal part	0.00135	0.0496	50	763	Mouse	Aff4,Alkbh1,Arid2,Atrx,Cbx1,Cbx5,Cbx7,Chd3,Chd4,Creb1,Crebbp,Ctnnb1,Dnmt1,Dnmt3a,Hjurp,Hmbox1,Hspa2,Kat2b,Kdm4a,Kdm4c,Kmt5b,Mad1l1,Mau2,Mecp2,Mef2a,Mki67,Mlh3,Myocd,Nipbl,Pbrm1,Plk2,Polr2a,Purb,Rarg,Rbbp4,Rfx3,Rif1,Rtel1,Sfr1,Sin3a,Smarca2,Smarce1,Smc6,Sp1,Stag1,Stn1,Trim28,Ubr2,Wapl,Wrn
GO:0031252	cell leading edge	0.0017	0.0587	27	763	Mouse	Abl2,Actr3,Amotl1,Arhgap31,Carmil1,Cdc42,Cdc42bpa,Cobl,Ctnnb1,Enah,Epb41l5,Fat1,Fgd4,Gas7,Itgb5,Myo9b,Nf2,Psd3,Ptprj,Raph1,Rdx,Rinl,Rock1,Slk,Sptbn1,Tirap,Trpm7
GO:0090575	RNA polymerase II transcription factor complex	0.00188	0.0595	10	763	Mouse	Creb1,Crebbp,Ctnnb1,Ercc4,Gtf2a1,Hipk2,Mxd4,Ncoa3,Trim28,Wwox
GO:0005694	chromosome	0.00192	0.0595	54	763	Mouse	Aff4,Alkbh1,Arid2,Atrx,Cbx1,Cbx5,Cbx7,Chd3,Chd4,Creb1,Crebbp,Ctnnb1,Dnmt1,Dnmt3a,Hjurp,Hmbox1,Hspa2,Kat2b,Kdm4a,Kdm4c,Kmt5b,Mad1l1,Mau2,Mecp2,Mef2a,Mki67,Mlh3,Myocd,Nipbl,Pbrm1,Pcgf3,Plk2,Polr2a,Purb,Rarg,Rbbp4,Rfx3,Rif1,Rtel1,Setd2,Sfr1,Sin3a,Smarca2,Smarce1,Smc6,Smchd1,Sp1,Stag1,Stn1,Trim28,Ubr2,Usp7,Wapl,Wrn
GO:0098687	chromosomal region	0.00278	0.0819	21	763	Mouse	Atrx,Cbx1,Cbx5,Crebbp,Dnmt1,Dnmt3a,Hjurp,Hmbox1,Kat2b,Kdm4a,Kdm4c,Kmt5b,Mad1l1,Mki67,Pbrm1,Rif1,Rtel1,Sin3a,Smc6,Stn1,Wrn
GO:0005739	mitochondrion	8.24e-25	4.32e-22	207	655	Rabbit	1110008L16Rik,Aadat,Acad10,Acat3,Aco1,Acsf2,Adh5,Aifm1,Ak3,Akr7a5,Aldh1l2,Aldh4a1,Aldh7a1,Alkbh7,Apool,Atp5c1,Atp5e,Atp5g2,Atp5l,Atp5o,Atp5s,Atpaf1,Bckdha,Bcs1l,Bloc1s1,Bnip3,Bola1,C330018D20Rik,Car5b,Cat,Ccdc58,Ccdc90b,Ccnb1,Cdk1,Cdk5rap1,Chchd3,Clpx,Clybl,Cmc1,Coa6,Comtd1,Coq6,Coq8b,Cox11,Cox18,Cox6a1,Cox8a,Crls1,Cryab,Cryzl2,Ctsd,Cyb5a,Cyp27a1,Dars2,Dbt,Ddit4,Dguok,Dhfr,Dnajc19,Dnajc4,Dut,Ecsi…
GO:0043231	intracellular membrane-bounded organelle	6.4e-18	1.68e-15	437	655	Rabbit	1110008L16Rik,Aadat,Acad10,Acat3,Acd,Aco1,Acsf2,Adh5,Ago4,Aifm1,Ak3,Akr7a5,Aldh1l2,Aldh4a1,Aldh7a1,Alkbh7,Alpk3,Ankrd37,Ap4b1,Apex1,Apool,Atp5c1,Atp5e,Atp5g2,Atp5l,Atp5o,Atp5s,Atpaf1,Bard1,Bbs7,Bcap31,Bche,Bckdha,Bcs1l,Bet1,Blm,Bloc1s1,Bnip3,Bola1,Brd7,Btbd18,C330018D20Rik,Car5b,Cat,Ccdc58,Ccdc90b,Ccna2,Ccnb1,Cd63,Cdk1,Cdk4,Cdk5rap1,Cdk7,Cdkn2aip,Cebpb,Cerkl,Chchd3,Chek1,Chil1,Clk1,Clpx,Clybl,Cmc…
GO:0043229	intracellular organelle	2.5e-15	4.18e-13	504	655	Rabbit	1110008L16Rik,Aadat,Acad10,Acat3,Acd,Aco1,Acsf2,Adh5,Ago4,Aifm1,Ak3,Akr7a5,Aldh1l2,Aldh4a1,Aldh7a1,Alkbh7,Alpk3,Ankrd37,Anxa2,Ap4b1,Apex1,Apool,Arpc3,Arpc4,Atat1,Atp5c1,Atp5e,Atp5g2,Atp5l,Atp5o,Atp5s,Atp6v0d2,Atpaf1,Bard1,Bbs7,Bcap31,Bcar1,Bche,Bckdha,Bcs1l,Bet1,Blm,Bloc1s1,Bnip3,Bola1,Bora,Brd7,Btbd18,C1qtnf5,C330018D20Rik,Capg,Car5b,Cat,Ccdc58,Ccdc90b,Ccna2,Ccnb1,Cd63,Cdca8,Cdk1,Cdk4,Cdk5rap1,C…
GO:0043227	membrane-bounded organelle	3.19e-15	4.18e-13	464	655	Rabbit	1110008L16Rik,Aadat,Acad10,Acat3,Acd,Aco1,Acsf2,Adh5,Ago4,Aifm1,Ak3,Akr7a5,Aldh1l2,Aldh4a1,Aldh7a1,Alkbh7,Alpk3,Ankrd37,Anxa2,Ap4b1,Apex1,Apool,Atp5c1,Atp5e,Atp5g2,Atp5l,Atp5o,Atp5s,Atp6v0d2,Atpaf1,Bard1,Bbs7,Bcap31,Bche,Bckdha,Bcs1l,Bet1,Blm,Bloc1s1,Bnip3,Bola1,Brd7,Btbd18,C1qtnf5,C330018D20Rik,Capg,Car5b,Cat,Ccdc58,Ccdc90b,Ccna2,Ccnb1,Cd63,Cdk1,Cdk4,Cdk5rap1,Cdk7,Cdkn2aip,Cebpb,Cerkl,Chchd3,Che…
GO:0005622	intracellular	6.48e-13	6.79e-11	563	655	Rabbit	1110008L16Rik,Aadat,Aamdc,Acad10,Acat3,Acd,Aco1,Acsf2,Ada,Adcy10,Adh5,Ago4,Aifm1,Ak3,Akr7a5,Aldh1l2,Aldh4a1,Aldh7a1,Alkbh7,Alpk3,Ankrd37,Ano4,Anxa1,Anxa11,Anxa2,Ap4b1,Apex1,Apool,Arpc3,Arpc4,Atat1,Atp1b2,Atp5c1,Atp5e,Atp5g2,Atp5l,Atp5o,Atp5s,Atp6v0d2,Atpaf1,Bard1,Bbs7,Bcap31,Bcar1,Bche,Bckdha,Bcs1l,Bet1,Blm,Blnk,Bloc1s1,Bnip3,Bola1,Bora,Brd7,Btbd18,C1qtnf5,C330018D20Rik,Capg,Capn3,Car2,Car5b,Cat,…
GO:0044424	intracellular part	1.26e-12	1.1e-10	559	655	Rabbit	1110008L16Rik,Aadat,Aamdc,Acad10,Acat3,Acd,Aco1,Acsf2,Ada,Adcy10,Adh5,Ago4,Aifm1,Ak3,Akr7a5,Aldh1l2,Aldh4a1,Aldh7a1,Alkbh7,Alpk3,Ankrd37,Anxa1,Anxa11,Anxa2,Ap4b1,Apex1,Apool,Arpc3,Arpc4,Atat1,Atp1b2,Atp5c1,Atp5e,Atp5g2,Atp5l,Atp5o,Atp5s,Atp6v0d2,Atpaf1,Bard1,Bbs7,Bcap31,Bcar1,Bche,Bckdha,Bcs1l,Bet1,Blm,Blnk,Bloc1s1,Bnip3,Bola1,Bora,Brd7,Btbd18,C1qtnf5,C330018D20Rik,Capg,Capn3,Car2,Car5b,Cat,Cavin…
GO:0043226	organelle	1.3e-11	9.73e-10	511	655	Rabbit	1110008L16Rik,Aadat,Acad10,Acat3,Acd,Aco1,Acsf2,Adh5,Ago4,Aifm1,Ak3,Akr7a5,Aldh1l2,Aldh4a1,Aldh7a1,Alkbh7,Alpk3,Ankrd37,Anxa1,Anxa2,Ap4b1,Apex1,Apool,Arpc3,Arpc4,Atat1,Atp5c1,Atp5e,Atp5g2,Atp5l,Atp5o,Atp5s,Atp6v0d2,Atpaf1,Bard1,Bbs7,Bcap31,Bcar1,Bche,Bckdha,Bcs1l,Bet1,Blm,Bloc1s1,Bnip3,Bola1,Bora,Brd7,Btbd18,C1qtnf5,C330018D20Rik,Capg,Car5b,Cat,Ccdc58,Ccdc90b,Ccna2,Ccnb1,Cd63,Cdca8,Cdk1,Cdk4,Cdk5…
GO:0005737	cytoplasm	2.41e-09	1.58e-07	424	655	Rabbit	1110008L16Rik,Aadat,Aamdc,Acad10,Acat3,Aco1,Acsf2,Ada,Adcy10,Adh5,Ago4,Aifm1,Ak3,Akr7a5,Aldh1l2,Aldh4a1,Aldh7a1,Alkbh7,Ankrd37,Anxa1,Anxa11,Anxa2,Ap4b1,Apex1,Apool,Atp1b2,Atp5c1,Atp5e,Atp5g2,Atp5l,Atp5o,Atp5s,Atp6v0d2,Atpaf1,Bbs7,Bcap31,Bche,Bckdha,Bcs1l,Bet1,Blm,Blnk,Bloc1s1,Bnip3,Bola1,C1qtnf5,C330018D20Rik,Capg,Capn3,Car2,Car5b,Cat,Cavin3,Ccdc58,Ccdc90b,Ccna2,Ccnb1,Cct6b,Cd63,Cdc42ep1,Cdk1,Cdk…
GO:0044444	cytoplasmic part	4.65e-09	2.71e-07	337	655	Rabbit	1110008L16Rik,Aadat,Acad10,Acat3,Aco1,Acsf2,Adh5,Ago4,Aifm1,Ak3,Akr7a5,Aldh1l2,Aldh4a1,Aldh7a1,Alkbh7,Anxa2,Ap4b1,Apool,Atp5c1,Atp5e,Atp5g2,Atp5l,Atp5o,Atp5s,Atp6v0d2,Atpaf1,Bbs7,Bcap31,Bche,Bckdha,Bcs1l,Bet1,Bloc1s1,Bnip3,Bola1,C1qtnf5,C330018D20Rik,Capg,Capn3,Car2,Car5b,Cat,Ccdc58,Ccdc90b,Ccnb1,Cct6b,Cd63,Cdk1,Cdk5rap1,Cep89,Cerkl,Chchd3,Chil1,Ckap2,Clpx,Clybl,Cmc1,Cnot3,Coa6,Comtd1,Copb1,Coq6,…
GO:0044429	mitochondrial part	3.82e-07	2e-05	48	655	Rabbit	1110008L16Rik,Aifm1,Ak3,Alkbh7,Apool,Atp5c1,Atp5e,Atp5l,Bloc1s1,Bnip3,Ccnb1,Cdk1,Chchd3,Clpx,Cyp27a1,Etfb,Gcat,Gcdh,Hsd17b10,Kmo,Marc2,Mdh2,Mrpl17,Mrps15,Ndufb8,Ndufb9,Ndufs4,Nnt,Oxa1l,Pdk1,Pdk2,Pemt,Phb2,Pmpcb,Ppp1cc,Sfxn1,Shmt2,Sirt5,Slc25a10,Slc3a1,Sqor,Stoml2,Timm17b,Tk2,Tmem14c,Trp53,Tufm,Uqcrc2
GO:0005743	mitochondrial inner membrane	2.94e-05	0.00131	33	655	Rabbit	Apool,Atp5c1,Atp5e,Atp5l,Chchd3,Clpx,Cyp27a1,Gcat,Gcdh,Hsd17b10,Kmo,Marc2,Mdh2,Mrpl17,Ndufb8,Ndufb9,Ndufs4,Nnt,Oxa1l,Phb2,Pmpcb,Sfxn1,Shmt2,Sirt5,Slc25a10,Slc3a1,Sqor,Stoml2,Timm17b,Tk2,Tmem14c,Tufm,Uqcrc2
GO:0019866	organelle inner membrane	3e-05	0.00131	35	655	Rabbit	Apool,Atp5c1,Atp5e,Atp5l,Chchd3,Clpx,Cyp27a1,Emd,Gcat,Gcdh,Hsd17b10,Kmo,Marc2,Mdh2,Mrpl17,Ndufb8,Ndufb9,Ndufs4,Nnt,Oxa1l,Phb2,Pmpcb,Sfxn1,Shmt2,Sirt5,Slc25a10,Slc3a1,Sqor,Stoml2,Timm17b,Tk2,Tmem14c,Tra2b,Tufm,Uqcrc2
GO:0031966	mitochondrial membrane	6.22e-05	0.00249	36	655	Rabbit	Aifm1,Apool,Atp5c1,Atp5e,Atp5l,Bnip3,Chchd3,Clpx,Cyp27a1,Gcat,Gcdh,Hsd17b10,Kmo,Marc2,Mdh2,Mrpl17,Ndufb8,Ndufb9,Ndufs4,Nnt,Oxa1l,Phb2,Pmpcb,Ppp1cc,Sfxn1,Shmt2,Sirt5,Slc25a10,Slc3a1,Sqor,Stoml2,Timm17b,Tk2,Tmem14c,Tufm,Uqcrc2
GO:0005740	mitochondrial envelope	6.66e-05	0.00249	38	655	Rabbit	Aifm1,Apool,Atp5c1,Atp5e,Atp5l,Bloc1s1,Bnip3,Chchd3,Clpx,Cyp27a1,Gcat,Gcdh,Hsd17b10,Kmo,Marc2,Mdh2,Mrpl17,Ndufb8,Ndufb9,Ndufs4,Nnt,Oxa1l,Pemt,Phb2,Pmpcb,Ppp1cc,Sfxn1,Shmt2,Sirt5,Slc25a10,Slc3a1,Sqor,Stoml2,Timm17b,Tk2,Tmem14c,Tufm,Uqcrc2
GO:0005759	mitochondrial matrix	0.000349	0.012	12	655	Rabbit	1110008L16Rik,Ak3,Alkbh7,Bloc1s1,Ccnb1,Cdk1,Etfb,Hsd17b10,Mrps15,Pdk1,Pdk2,Trp53
GO:0031975	envelope	0.00039	0.012	46	655	Rabbit	Aifm1,Apool,Atp5c1,Atp5e,Atp5l,Bche,Bloc1s1,Bnip3,Chchd3,Clpx,Cyp27a1,Emd,Gcat,Gcdh,Hsd17b10,Kmo,Marc2,Mdh2,Mrpl17,Ndufb8,Ndufb9,Ndufs4,Nnt,Nxt1,Oxa1l,Pemt,Phb2,Pmpcb,Ppp1cc,Rac2,Sfxn1,Shmt2,Sirt5,Slc25a10,Slc3a1,Sqor,Stoml2,Timm17b,Tk2,Tmem14c,Tor1a,Tor1b,Tra2b,Tufm,Uaca,Uqcrc2
GO:0031967	organelle envelope	0.00039	0.012	46	655	Rabbit	Aifm1,Apool,Atp5c1,Atp5e,Atp5l,Bche,Bloc1s1,Bnip3,Chchd3,Clpx,Cyp27a1,Emd,Gcat,Gcdh,Hsd17b10,Kmo,Marc2,Mdh2,Mrpl17,Ndufb8,Ndufb9,Ndufs4,Nnt,Nxt1,Oxa1l,Pemt,Phb2,Pmpcb,Ppp1cc,Rac2,Sfxn1,Shmt2,Sirt5,Slc25a10,Slc3a1,Sqor,Stoml2,Timm17b,Tk2,Tmem14c,Tor1a,Tor1b,Tra2b,Tufm,Uaca,Uqcrc2
GO:1990204	oxidoreductase complex	0.00112	0.0326	7	655	Rabbit	Etfb,Ndufb8,Ndufs4,Pdk1,Pdk2,Rrm2,Uqcrc2
GO:0005657	replication fork	0.00142	0.0345	6	655	Rabbit	Blm,Chek1,Nbn,Pcna,Pola2,Trp53
GO:0070013	intracellular organelle lumen	0.00145	0.0345	76	655	Rabbit	1110008L16Rik,Acd,Aifm1,Ak3,Alkbh7,Bche,Bloc1s1,Brd7,Ccnb1,Cdk1,Cebpb,Cpsf3,Cxxc1,Ddx20,Ddx39b,Dkc1,Dnajb9,E2f4,Emd,Epas1,Etfb,Exosc10,Gnpat,H3f3a,Hdac1,Hif1a,Hira,Hmgn5,Hormad1,Hsd17b10,Ilf2,Kdelc1,Lyar,Mbip,Mcm2,Med10,Med18,Med27,Med6,Mlh1,Mrps15,Msh6,Mtdh,Nbn,Npm3,Nr2c1,Pcgf2,Pcna,Pdk1,Pdk2,Pes1,Plk1,Pola2,Polr2j,Polr3gl,Rbm4,Rgs14,Rpl11,Rpl12,Rpl23,Rybp,Satb2,Setd1a,Sgf29,Smarcd3,Smn1,Tada2a,…
GO:0031974	membrane-enclosed lumen	0.00145	0.0345	76	655	Rabbit	1110008L16Rik,Acd,Aifm1,Ak3,Alkbh7,Bche,Bloc1s1,Brd7,Ccnb1,Cdk1,Cebpb,Cpsf3,Cxxc1,Ddx20,Ddx39b,Dkc1,Dnajb9,E2f4,Emd,Epas1,Etfb,Exosc10,Gnpat,H3f3a,Hdac1,Hif1a,Hira,Hmgn5,Hormad1,Hsd17b10,Ilf2,Kdelc1,Lyar,Mbip,Mcm2,Med10,Med18,Med27,Med6,Mlh1,Mrps15,Msh6,Mtdh,Nbn,Npm3,Nr2c1,Pcgf2,Pcna,Pdk1,Pdk2,Pes1,Plk1,Pola2,Polr2j,Polr3gl,Rbm4,Rgs14,Rpl11,Rpl12,Rpl23,Rybp,Satb2,Setd1a,Sgf29,Smarcd3,Smn1,Tada2a,…
GO:0043233	organelle lumen	0.00145	0.0345	76	655	Rabbit	1110008L16Rik,Acd,Aifm1,Ak3,Alkbh7,Bche,Bloc1s1,Brd7,Ccnb1,Cdk1,Cebpb,Cpsf3,Cxxc1,Ddx20,Ddx39b,Dkc1,Dnajb9,E2f4,Emd,Epas1,Etfb,Exosc10,Gnpat,H3f3a,Hdac1,Hif1a,Hira,Hmgn5,Hormad1,Hsd17b10,Ilf2,Kdelc1,Lyar,Mbip,Mcm2,Med10,Med18,Med27,Med6,Mlh1,Mrps15,Msh6,Mtdh,Nbn,Npm3,Nr2c1,Pcgf2,Pcna,Pdk1,Pdk2,Pes1,Plk1,Pola2,Polr2j,Polr3gl,Rbm4,Rgs14,Rpl11,Rpl12,Rpl23,Rybp,Satb2,Setd1a,Sgf29,Smarcd3,Smn1,Tada2a,…
GO:0044446	intracellular organelle part	0.00218	0.0498	190	655	Rabbit	1110008L16Rik,Acd,Aifm1,Ak3,Alkbh7,Ap4b1,Apool,Arpc3,Arpc4,Atat1,Atp5c1,Atp5e,Atp5l,Bbs7,Bcap31,Bche,Bet1,Blm,Bloc1s1,Bnip3,Bora,Brd7,Cat,Ccnb1,Cdca8,Cdk1,Cebpb,Cep89,Chchd3,Chek1,Ckap2,Clpx,Cpsf3,Cxxc1,Cyb561a3,Cyp27a1,Dctn6,Ddx20,Ddx39b,Dkc1,Dnajb9,Dync2li1,Dynlrb2,Dzip1,E2f4,Emd,Epas1,Etfb,Exosc10,Fam161a,Fbxl7,Fbxo6,Fgf13,Fhl3,Fyn,Gcat,Gcdh,Gnpat,H3f3a,Hdac1,Hif1a,Hira,Hmgn5,Hormad1,Hsd17b10,…

## Sheet: Molecular_function
TermID	Term	P	Q	k	n	Query set	Gene symbols
GO:0003824	catalytic activity	8.2e-09	1.37e-05	818	1919	Common	Aars,Aarsd1,Aass,Abcb1a,Abcg2,Abhd12,Abhd13,Abhd16a,Abhd17b,Abhd6,Acaa1a,Acacb,Acadl,Acadm,Acat1,Aco2,Acot7,Acot8,Acot9,Acp1,Acp2,Acsl4,Acss1,Acvr1b,Adam10,Adam17,Adam8,Adam9,Adamts1,Adamts14,Adamts15,Adamts2,Adamts4,Adamts7,Adamts9,Adar,Adcy2,Adcy3,Adcy5,Adh1,Adk,Adpgk,Adprh,Adss,Aebp1,Agap3,Agbl5,Agk,Agl,Agpat1,Agpat4,Agpat5,Agtpbp1,Ak1,Akr1a1,Akr1b3,Alas2,Aldh18a1,Aldh1a1,Aldh1a2,Aldh1a3,Aldh3…
GO:0140096	catalytic activity, acting on a protein	9.63e-07	0.00051	336	1919	Common	Abhd12,Abhd13,Abhd17b,Acvr1b,Adam10,Adam17,Adam8,Adam9,Adamts1,Adamts14,Adamts15,Adamts2,Adamts4,Adamts7,Adamts9,Aebp1,Agbl5,Agtpbp1,Asb2,Ash2l,Ate1,Atg3,Atg4b,Atm,Atr,Atxn3,Bace1,Bckdk,Bmp1,Bmp2k,Bmpr1b,Brd4,Brsk1,Btk,Btrc,Camk2g,Camk4,Capn1,Capn2,Capns1,Carm1,Casp1,Casp2,Casp3,Casp8,Casp9,Cbll1,Ccnd3,Cdk14,Cdk16,Cdk2,Cdk5,Chek2,Chfr,Chuk,Clk2,Clk3,Cndp2,Csk,Csnk1a1,Csnk1d,Csnk1e,Ctsc,Ctse,Ctsh,…
GO:0016772	transferase activity, transferring phosphorus-containing groups	1.13e-06	0.00051	186	1919	Common	Acvr1b,Adk,Adpgk,Agk,Ak1,Aldh18a1,Atm,Atr,Bckdk,Bmp2k,Bmpr1b,Brd4,Brsk1,Btk,Camk2g,Camk4,Ccnd3,Ccnh,Cdk14,Cdk16,Cdk2,Cdk5,Cept1,Cerk,Chek2,Chka,Chpt1,Chuk,Ckm,Clk2,Clk3,Coasy,Col4a3bp,Csk,Csnk1a1,Csnk1d,Csnk1e,Dapk1,Dclk1,Ddr2,Dgka,Dgkb,Dgki,Dpagt1,Dtymk,Eef2k,Egfr,Eif2ak1,Eif2ak3,Eif2ak4,Epha3,Epha4,Epha5,Epha7,Etnk2,Fam20c,Fgr,Fuk,Grk3,Gsk3a,Gsk3b,Guk1,Hk1,Hk2,Ick,Ikbkb,Ikbke,Ipmk,Irak1,Itpkc,J…
GO:0016301	kinase activity	1.22e-06	0.00051	168	1919	Common	Acvr1b,Adk,Adpgk,Agk,Ak1,Aldh18a1,Atm,Atr,Bckdk,Bmp2k,Bmpr1b,Brd4,Brsk1,Btk,Camk2g,Camk4,Ccnd3,Ccnh,Cdk14,Cdk16,Cdk2,Cdk5,Cerk,Chek2,Chka,Chuk,Ckm,Clk2,Clk3,Coasy,Col4a3bp,Csk,Csnk1a1,Csnk1d,Csnk1e,Dapk1,Dclk1,Ddr2,Dgka,Dgkb,Dgki,Dtymk,Eef2k,Egfr,Eif2ak1,Eif2ak3,Eif2ak4,Epha3,Epha4,Epha5,Epha7,Etnk2,Fam20c,Fgr,Fuk,Grk3,Gsk3a,Gsk3b,Guk1,Hk1,Hk2,Ick,Ikbkb,Ikbke,Ipmk,Irak1,Itpkc,Jak1,Jak2,Kdr,Khk,Li…
GO:0016740	transferase activity	8.54e-06	0.00286	366	1919	Common	Acaa1a,Acat1,Acvr1b,Adk,Adpgk,Agk,Agpat1,Agpat4,Agpat5,Ak1,Alas2,Aldh18a1,Alkbh8,Aprt,Asb2,Ash2l,Asmt,Ate1,Atg3,Atg7,Atm,Atr,B3galnt1,B4galnt1,B4galt1,Bcat1,Bckdk,Bmp2k,Bmpr1b,Brd4,Brsk1,Btk,Btrc,Camk2g,Camk4,Carm1,Cbll1,Ccnd3,Ccnh,Cdk14,Cdk16,Cdk2,Cdk5,Cept1,Cerk,Cers2,Cers4,Cers5,Cers6,Chek2,Chfr,Chka,Chpt1,Chst10,Chst11,Chst2,Chuk,Ckm,Clk2,Clk3,Coasy,Col4a3bp,Cpt1a,Crot,Cs,Csk,Csnk1a1,Csnk1d,C…
GO:0016773	phosphotransferase activity, alcohol group as acceptor	1.67e-05	0.00467	152	1919	Common	Acvr1b,Adk,Adpgk,Atm,Atr,Bckdk,Bmp2k,Bmpr1b,Brd4,Brsk1,Btk,Camk2g,Camk4,Ccnd3,Cdk14,Cdk16,Cdk2,Cdk5,Chek2,Chka,Chuk,Clk2,Clk3,Coasy,Csk,Csnk1a1,Csnk1d,Csnk1e,Dapk1,Dclk1,Ddr2,Dgka,Dgkb,Dgki,Eef2k,Egfr,Eif2ak1,Eif2ak3,Eif2ak4,Epha3,Epha4,Epha5,Epha7,Etnk2,Fam20c,Fgr,Fuk,Grk3,Gsk3a,Gsk3b,Hk1,Hk2,Ick,Ikbkb,Ikbke,Ipmk,Irak1,Itpkc,Jak1,Jak2,Kdr,Khk,Limk2,Lyn,Map2k1,Map2k3,Map3k10,Map3k12,Map3k4,Map4k1…
GO:0042578	phosphoric ester hydrolase activity	5.27e-05	0.0126	71	1919	Common	Acp1,Acp2,Atp1a1,Bpnt1,Cnp,Dusp10,Dusp16,Dusp22,Dusp6,Dusp8,Enpp6,Eya1,Eya3,G6pc3,Gde1,Gdpd1,Gdpd5,Gpld1,Impad1,Inpp4a,Inpp4b,Inpp5b,Inpp5d,Inpp5f,Lpin1,Lpin2,Mtmr1,Mtmr2,Mtmr7,Napepld,Nt5c,Nt5e,Ocrl,Pde10a,Pde2a,Pde4b,Pde6d,Pde7b,Pde8a,Pfkfb2,Plcb1,Plcg2,Pld2,Plpp1,Plpp3,Ppa2,Ppm1a,Ppm1g,Ppm1l,Ppp1cb,Ppp2ca,Ppp2r1a,Ppp3ca,Ppp3cb,Ppp3r1,Ppp5c,Pten,Ptp4a1,Ptpn12,Ptpn2,Ptpn6,Ptpn7,Ptprc,Ptprk,Ptpro…
GO:0019899	enzyme binding	0.00013	0.0272	84	1919	Common	Adam10,Akap7,Ankra2,Ankrd27,Arhgef15,Arhgef9,Bcl2,Brd4,Cav2,Cyth1,Cyth2,Dact1,Dennd1b,Dennd4c,Dhx36,Diaph1,Dock10,Dock11,Dock7,Dock8,Dock9,Elp2,Eps8,Erc1,Exoc2,Fgd2,Fgr,Flna,Fmnl1,Gapvd1,Gas8,Gclm,Gtf2i,Irs1,Ksr1,Lpin1,Lsm2,Madd,Mef2d,Mical1,Mlph,Mtss1l,Myrip,Nbea,Nbr1,Ngfr,Pabpn1,Pard6a,Pea15a,Phactr4,Plekhg5,Ppp1r15a,Preb,Prkrip1,Ptprr,Ranbp10,Rangrf,Rapgef2,Rapgef3,Rgl2,Rnf180,Rrn3,Smyd2,Smyd3…
GO:0016791	phosphatase activity	0.000168	0.0313	54	1919	Common	Acp1,Acp2,Atp1a1,Bpnt1,Dusp10,Dusp16,Dusp22,Dusp6,Dusp8,Eya1,Eya3,G6pc3,Impad1,Inpp4a,Inpp4b,Inpp5b,Inpp5d,Inpp5f,Lpin1,Lpin2,Mtmr1,Mtmr2,Mtmr7,Nt5c,Nt5e,Ocrl,Pfkfb2,Plpp1,Plpp3,Ppa2,Ppm1a,Ppm1g,Ppm1l,Ppp1cb,Ppp2ca,Ppp2r1a,Ppp3ca,Ppp3cb,Ppp3r1,Ppp5c,Pten,Ptp4a1,Ptpn12,Ptpn2,Ptpn6,Ptpn7,Ptprc,Ptprk,Ptpro,Ptprr,Sgpp1,Synj1,Tigar,Ubash3b
GO:0008234	cysteine-type peptidase activity	0.000575	0.0963	28	1919	Common	Atg4b,Atxn3,Capn1,Capn2,Capns1,Casp1,Casp2,Casp3,Casp8,Casp9,Ctsh,Ctsl,Ctss,Eif3f,Espl1,Lgmn,Otud6b,Otulin,Senp2,Senp3,Uchl1,Ufsp2,Usp15,Usp18,Usp19,Usp22,Usp30,Usp8
GO:0003712	transcription coregulator activity	2.93e-06	0.00234	35	501	Mouse	Aebp2,Arnt,Atf7ip,C1d,Cbfa2t2,Crebbp,Ctnnb1,Ddx5,Gon4l,Hcfc1,Hipk2,Hr,Jmy,Kat2b,Kdm5a,Limd1,Mkl2,Myocd,Naca,Ncoa2,Ncoa3,Ncor2,Nrip1,Nsd1,Rad54l2,Raly,Rbm39,Scai,Sin3a,Tbl1xr1,Tcf4,Trim28,Trrap,Ube3a,Zfp281
GO:0003824	catalytic activity	3.29e-05	0.023	175	365	Rabbit	Abhd4,Aco1,Acvr1,Ada,Adcy10,Adh5,Aga,Aifm1,Alad,Aldh4a1,Aoah,Aph1a,Asah1,Atat1,Atg10,Bche,Blm,Blmh,Camkmt,Capn3,Car2,Car5b,Casp7,Cat,Ccnb1,Cdc34,Cdk1,Cdk4,Cdk5rap1,Cdk7,Chek1,Chkb,Chst3,Clk1,Clpx,Clybl,Cpsf3,Csgalnact2,Ctsd,Cyb5a,Cyp39a1,Dffb,Dgat1,Dguok,Dhfr,Dnase2a,Dpep2,Echdc1,Eefsec,Egln3,Eogt,Ephb3,Etfb,Ext2,Eya2,Fah,Fan1,Fap,Fbxo4,Fbxo6,Flt3,Fuom,Fut8,Fyn,Gale,Galk1,Galt,Glb1,Gm2a,Gnpat,Gpa…
