# Supplementary material for: Transcriptomics as Precision Medicine to Classify <em>In Vivo</em> Models of Dietary-Induced Atherosclerosis at Cellular and Molecular Levels
Source: Preprints.org preprint supplement (doi:10.20944/preprints201809.0082.v1), 2018-09-05
Supplement: Supplementary file 27 [file Supplemental_Table_9.xlsx]

## Sheet: Mammalian_phenotype
TermID	Term	P	Q	k	n	Query set	Gene symbols
MP:0010769	abnormal survival	3.45e-36	2.86e-32	2015	4028	Common	2700049A03Rik,4930453N24Rik,4933427D14Rik,Aars,Aars2,Aatf,Abca3,Abca5,Abcb10,Abcb1a,Abcb6,Abcb7,Abcc9,Abce1,Abcf1,Abhd16a,Abhd5,Abi1,Abi3bp,Acadl,Acadm,Acadvl,Ackr3,Acly,Acsl4,Acss1,Actl6a,Actr8,Acvr1b,Acvrl1,Adam10,Adam12,Adam17,Adam19,Adam22,Adam23,Adamts1,Adamts9,Adar,Adarb1,Adcy3,Adcyap1r1,Add1,Adgrg6,Adgrl2,Adk,Adm,Adsl,Aebp1,Agap1,Aggf1,Agl,Agpat1,Agps,Agtr1a,Ahctf1,Ahi1,Ahr,Aimp2,Akap10,Ak…
MP:0010770	preweaning lethality	7.62e-30	3.16e-26	1782	4028	Common	2700049A03Rik,4933427D14Rik,Aars,Aars2,Aatf,Abca3,Abcb10,Abcb7,Abcc9,Abce1,Abcf1,Abhd16a,Abhd5,Abi1,Abi3bp,Acadl,Acadm,Ackr3,Acly,Acsl4,Actl6a,Actr8,Acvr1b,Acvrl1,Adam10,Adam12,Adam17,Adam19,Adam22,Adam23,Adamts1,Adamts9,Adar,Adarb1,Adcy3,Adcyap1r1,Add1,Adgrg6,Adgrl2,Adk,Adm,Adsl,Aebp1,Agap1,Aggf1,Agl,Agpat1,Agps,Agtr1a,Ahctf1,Ahi1,Ahr,Aimp2,Akap10,Akap6,Akirin2,Akna,Alas1,Alas2,Aldh1a2,Aldh1a3,A…
MP:0010768	mortality/aging	9.04e-29	2.5e-25	2181	4028	Common	2700049A03Rik,4930453N24Rik,4933427D14Rik,Aars,Aars2,Aatf,Abca3,Abca5,Abcb10,Abcb1a,Abcb6,Abcb7,Abcc4,Abcc9,Abce1,Abcf1,Abhd16a,Abhd5,Abi1,Abi3bp,Acadl,Acadm,Acadvl,Ackr3,Acly,Acsl4,Acss1,Actl6a,Actr8,Acvr1b,Acvrl1,Adam10,Adam12,Adam17,Adam19,Adam22,Adam23,Adamts1,Adamts9,Adar,Adarb1,Adcy3,Adcyap1r1,Add1,Adgre5,Adgrg6,Adgrl2,Adh1,Adipoq,Adk,Adm,Adsl,Aebp1,Agap1,Agbl5,Aggf1,Agl,Agpat1,Agps,Agtr1a,…
MP:0002080	prenatal lethality	1.11e-27	2.3e-24	1068	4028	Common	2700049A03Rik,4933427D14Rik,Aars,Aatf,Abca3,Abcb10,Abcb7,Abce1,Abcf1,Abhd16a,Abi1,Acadl,Acly,Actl6a,Actr8,Acvr1b,Acvrl1,Adam10,Adam17,Adamts9,Adar,Add1,Adgrg6,Adgrl2,Adm,Adsl,Aebp1,Aggf1,Ahctf1,Akap10,Akirin2,Alas1,Alas2,Aldh1a2,Ambra1,Amd1,Anapc4,Angptl4,Ank1,Ank3,Ankrd11,Anks6,Anxa7,Ap1g1,Ap1m1,Ap2m1,Apaf1,Apbb2,Apc,Aplp2,Apob,Aqp1,Arap3,Arf6,Arfgef2,Arid1a,Arid4b,Arih2,Arl13b,Arl3,Armc5,Arrdc3…
MP:0008762	embryonic lethality	1.35e-26	2.24e-23	846	4028	Common	2700049A03Rik,4933427D14Rik,Aars,Aatf,Abcb10,Abcb7,Abce1,Abcf1,Abi1,Acly,Actl6a,Actr8,Acvr1b,Acvrl1,Adam10,Adamts9,Adar,Adgrg6,Adm,Adsl,Aggf1,Ahctf1,Akap10,Akirin2,Alas1,Alas2,Aldh1a2,Ambra1,Amd1,Anapc4,Ankrd11,Anxa7,Ap1g1,Ap1m1,Ap2m1,Apbb2,Apc,Aplp2,Apob,Arap3,Arfgef2,Arid1a,Arid4b,Arih2,Arl13b,Armc5,Arrdc3,Ash2l,Atm,Atoh8,Atp2c1,Atp5b,Atp6v0a1,Atp6v0c,Atp6v0d1,Atp6v1b2,Atp6v1d,Atp6v1h,Atp7a,Atr…
MP:0013292	embryonic lethality prior to organogenesis	1.08e-16	1.49e-13	398	4028	Common	4933427D14Rik,Aars,Aatf,Abcb7,Abce1,Abcf1,Acly,Actr8,Acvr1b,Adamts9,Adar,Adsl,Aggf1,Ahctf1,Alas1,Amd1,Anapc4,Ap1g1,Ap2m1,Apc,Arfgef2,Arid1a,Ash2l,Atoh8,Atp5b,Atp6v0a1,Atp6v0c,Atp6v0d1,Atp6v1b2,Atp6v1d,Atr,Atxn10,B3galnt1,B3gat3,B3gnt5,Bap1,Becn1,Bmp4,Brca2,Bub1b,Bub3,Bysl,Caml,Capn2,Capn5,Casp8ap2,Ccdc174,Ccnk,Cct3,Cdan1,Cdc20,Cdc25a,Cdc7,Cdipt,Cdk11b,Cdk8,Cenpe,Cenpj,Cenpu,Chka,Chmp3,Chmp4b,Chrd…
MP:0013293	embryonic lethality prior to tooth bud stage	1.69e-16	2e-13	431	4028	Common	4933427D14Rik,Aars,Aatf,Abcb7,Abce1,Abcf1,Acly,Actr8,Acvr1b,Adamts9,Adar,Adsl,Aggf1,Ahctf1,Akap10,Alas1,Amd1,Anapc4,Ap1g1,Ap2m1,Apbb2,Apc,Arfgef2,Arid1a,Arih2,Ash2l,Atoh8,Atp5b,Atp6v0a1,Atp6v0c,Atp6v0d1,Atp6v1b2,Atp6v1d,Atr,Atxn10,B3galnt1,B3gat3,B3gnt5,Bap1,Becn1,Bloc1s2,Bmp4,Brca2,Bub1b,Bub3,Bysl,Caml,Capn2,Capn5,Casp8ap2,Ccdc174,Ccnk,Cct3,Cdan1,Cdc20,Cdc25a,Cdc7,Cdipt,Cdk11b,Cdk8,Cenpe,Cenpj,C…
MP:0011100	preweaning lethality, complete penetrance	1.09e-13	1.13e-10	425	4028	Common	4933427D14Rik,Aars2,Ackr3,Actr8,Acvr1b,Adam23,Adar,Adgrg6,Adm,Adsl,Alg10b,Alg2,Anapc4,Ank1,Ankrd11,Anks6,Arih2,Armh3,Atg3,Atp1a1,Atp5b,Atp5f1,Atp6v0a1,Atp6v1b2,Atp6v1d,Atp7a,Atr,Atxn10,Atxn7l3,B4galt5,B4gat1,Bag3,Bap1,Bbs10,Bcl7a,Bloc1s2,Bms1,Cacna1a,Cald1,Carm1,Casz1,Cbx4,Cdc123,Cdc20,Cdc25a,Cdc7,Cdipt,Cdk8,Cds2,Celf4,Cenpe,Cenph,Cep164,Cep97,Cfl1,Chmp3,Chst11,Cinp,Cldn1,Cmip,Cnnm2,Cnot4,Cntn1,C…
MP:0005621	abnormal cell physiology	5.83e-12	5.38e-09	1382	4028	Common	2700049A03Rik,Aars,Aatf,Abcb10,Abcb6,Abcc9,Abcg2,Abhd5,Acacb,Acads,Acadvl,Acp1,Acss1,Actl6a,Acvr1b,Adam10,Adam17,Adam8,Adam9,Adamts7,Adar,Adcy3,Adgrg1,Adgrg6,Adipoq,Adm,Aebp1,Aggf1,Ahctf1,Ahi1,Ahr,Aifm2,Aimp1,Ajuba,Ak1,Akap6,Akr1a1,Akt3,Aldh1a2,Aldh2,Aldh3a2,Alg2,Alox5,Ambra1,Ank,Ank2,Antxr2,Anxa7,Anxa8,Ap1b1,Ap1s2,Ap2m1,Ap3b1,Apaf1,Apbb1,Apc,Apex2,Apob,App,Appl1,Appl2,Ar,Arcn1,Arfgef1,Arfgef2,Ar…
MP:0009850	embryonic lethality between implantation and placentation	1.29e-10	1.07e-07	240	4028	Common	Abcb7,Abce1,Acly,Adamts9,Ahctf1,Alas1,Amd1,Apc,Arid1a,Ash2l,Atoh8,Atr,Atxn10,Bap1,Becn1,Bmp4,Brca2,Bub1b,Bub3,Bysl,Caml,Ccdc174,Cct3,Cdan1,Cdc20,Cdc25a,Cdc7,Cenpe,Cenpj,Cenpu,Chka,Chmp4b,Chrd,Clns1a,Copb2,Cops2,Cops3,Cops5,Cops6,Cript,Cse1l,Ctdnep1,Cul1,Cul3,Cyfip1,Dab2,Ddx24,Dhx29,Dhx36,Dhx9,Dicer1,Dld,Dnaja3,Donson,Dpagt1,Dpy30,Drap1,Dsp,Dync1h1,E4f1,Eef1e1,Efnb2,Egfr,Eif2s2,Ercc3,Espl1,Ezh2,Fb…
MP:0005384	cellular phenotype	8.99e-10	6.78e-07	1593	4028	Common	2700049A03Rik,Aaas,Aars,Aatf,Abcb10,Abcb6,Abcb7,Abcc5,Abcc9,Abcd3,Abcg2,Abhd5,Acacb,Acad8,Acads,Acadvl,Acp1,Acp2,Acss1,Actl6a,Acvr1b,Adam10,Adam17,Adam8,Adam9,Adamts2,Adamts7,Adar,Adcy3,Adgrg1,Adgrg2,Adgrg6,Adipoq,Adipor2,Adm,Aebp1,Agfg1,Aggf1,Agps,Agtpbp1,Ahctf1,Ahi1,Ahr,Aifm2,Aimp1,Ajuba,Ak1,Akap6,Akap9,Akr1a1,Akt3,Aldh1a2,Aldh2,Aldh3a2,Alg2,Alox5,Ambra1,Amfr,Amph,Ank,Ank2,Anp32a,Antxr2,Anxa7,A…
MP:0002127	abnormal cardiovascular system morphology	2.94e-09	2.03e-06	885	4028	Common	2700049A03Rik,4933434E20Rik,Aars,Aars2,Abca3,Abca5,Abcb8,Abcc9,Abhd5,Abi1,Acacb,Acadl,Acadm,Acadvl,Ackr3,Acsl4,Acsl5,Acta2,Acvrl1,Adam10,Adam15,Adam17,Adam19,Adam9,Adamts12,Adamts6,Adamts7,Adamts9,Adgrg6,Adgrl3,Adipoq,Adm,Adsl,Aebp1,Aggf1,Agtr1a,Ahr,Akap12,Akap6,Aldh1a2,Aldob,Alg10b,Amotl2,Angptl4,Ank,Ank1,Ankrd1,Ankrd26,Anks6,Antxr2,Anxa3,Ap1b1,Ap1g1,Ap2b1,Ap4e1,Apc,Ar,Arap3,Arhgef15,Arhgef26,Ar…
MP:0011098	embryonic lethality during organogenesis, complete penetrance	1.37e-07	8.78e-05	318	4028	Common	2700049A03Rik,Abcb10,Abi1,Acvr1b,Acvrl1,Adam10,Adamts9,Adar,Adgrg6,Adm,Akirin2,Alas2,Aldh1a2,Ankrd11,Anxa7,Ap1m1,Apc,Arap3,Arid1a,Arl13b,Atp2c1,Atp6v1h,Atp7a,Axin1,B4galt5,B4gat1,Bag1,Bap1,Barx1,Bcor,Bicral,Bmp4,Brca2,Brpf1,C1galt1c1,Cacnb2,Capns1,Casc3,Casp8,Casz1,Cbfb,Ccdc134,Ccm2,Ccnc,Cdc20,Cdh2,Cenpj,Cep120,Chd7,Chm,Chmp5,Cluap1,Col4a3bp,Col5a2,Commd9,Cops6,Coq7,Cpox,Csk,Ctdnep1,Ctgf,Cubn,Cul…
MP:0006205	embryonic lethality between implantation and somite formation	3.55e-07	0.00021	162	4028	Common	Abcb7,Abce1,Acly,Adamts9,Ahctf1,Amd1,Apc,Arid1a,Atoh8,Atr,Becn1,Bmp4,Bub1b,Bub3,Bysl,Caml,Ccdc174,Cdan1,Cdc20,Cdc25a,Cdc7,Cenpe,Chka,Chmp4b,Clns1a,Cops2,Cops5,Cops6,Cse1l,Cul1,Cul3,Dhx29,Dhx36,Dhx9,Dicer1,Dld,Dnaja3,Dpagt1,Drap1,Dsp,Dync1h1,E4f1,Egfr,Espl1,Ezh2,Fbn1,Fermt2,Fgfr2,Flcn,Gadd45gip1,Gapdh,Gata6,Gclc,Gdf3,Gmnn,Gnl3,Grb2,Hinfp,Hnrnpc,Hsp90b1,Ilk,Ints6,Kat8,Kdm1a,Kitl,Knl1,Kpnb1,Lamb1,La…
MP:0005378	growth/size/body region phenotype	5.91e-07	0.000309	1733	4028	Common	2700049A03Rik,4930453N24Rik,4933427D14Rik,4933434E20Rik,Aaas,Aars,Aatf,Abcb1a,Abcb7,Abcc4,Abcc9,Abhd16a,Abhd5,Abi1,Acacb,Acadvl,Acot13,Acot7,Acp1,Acp2,Acsl3,Acsl4,Acss1,Acvr1b,Acvrl1,Adam10,Adam17,Adam22,Adam23,Adamts1,Adamts18,Adamts2,Adamts6,Adar,Adarb1,Adcy3,Adcyap1r1,Add1,Adgrg6,Adh1,Adipoq,Adipor2,Adk,Adpgk,Aebp1,Afap1l2,Agtpbp1,Agtr1a,Ahi1,Ahr,Akap10,Akap11,Akap17b,Akap6,Akap9,Akna,Akr1a1,A…
MP:0006207	embryonic lethality during organogenesis	5.96e-07	0.000309	386	4028	Common	2700049A03Rik,Abcb10,Abi1,Acvr1b,Acvrl1,Adam10,Adamts9,Adar,Adgrg6,Adm,Akirin2,Alas2,Aldh1a2,Ambra1,Ankrd11,Anxa7,Ap1m1,Apc,Apob,Arap3,Arid1a,Arl13b,Atp2c1,Atp6v1h,Atp7a,Axin1,B4galt5,B4gat1,Bag1,Bap1,Barx1,Bbs1,Bbs4,Bcor,Becn1,Bicral,Bmp4,Brca2,Brpf1,C1galt1c1,Cacnb2,Capns1,Casc3,Casp8,Casz1,Cbfb,Ccdc134,Ccm2,Ccnc,Cdc20,Cdh2,Cenpj,Cep120,Chd7,Chm,Chmp5,Ciapin1,Cluap1,Col4a3bp,Col5a2,Commd1,Commd…
MP:0000875	abnormal cerebellar Purkinje cell layer	8.11e-07	0.00039	125	4028	Common	Aars,Acp2,Adamts4,Agtpbp1,Akap12,Als2,Ank1,Ank3,Arcn1,Arsg,Ass1,Astn1,Atf2,Atg5,Atg7,Atm,Atp7a,Atr,Bcl2l2,Bicd2,Bmi1,Cacna1a,Camk4,Camta1,Ccnd2,Chp1,Cln3,Cntn1,Cntnap1,Cp,Ctnna2,Cxcr4,Dner,Dnm1l,Dpysl5,Ebf2,Egfr,Ei24,Eif2b5,Erbb3,Fbxw7,Fmr1,Foxp2,Fzd4,Gas1,Gba,Gja1,Gli2,Glrb,Gnptab,Herc1,Hgsnat,Hsd17b4,Inpp4a,Ip6k3,Ireb2,Itpr1,Ldb1,Lpin2,Lrp8,Lyst,Map1a,Map1b,Map2,Map2k4,Mapk8ip2,Mfn2,Mtcl1,Mthfr…
MP:0002925	abnormal cardiovascular development	8.46e-07	0.00039	361	4028	Common	2700049A03Rik,4933434E20Rik,Abcc9,Abi1,Ackr3,Acvrl1,Adam10,Adam19,Adamts12,Adamts7,Adgrg6,Adm,Aggf1,Ahr,Aldh1a2,Angptl4,Apc,Arap3,Arhgef15,Arid1a,Ate1,Atg16l1,Atmin,Atp7a,Axin1,B4galt1,Bcor,Becn1,Bmp4,Capn2,Capns1,Casp8,Casz1,Cav2,Cc2d2a,Ccdc134,Ccdc88a,Ccl2,Ccm2,Cd44,Cd47,Cd82,Cdh2,Celf4,Cep120,Cfl1,Chd7,Chm,Chmp5,Chrd,Chst11,Clic4,Cluap1,Cmip,Col4a3bp,Commd9,Coro1c,Crim1,Csk,Ctbp2,Ctgf,Ctss,Cub…
MP:0002088	abnormal embryonic growth/weight/body size	9.96e-07	0.000435	422	4028	Common	4933427D14Rik,Aatf,Abcb7,Abi1,Acvr1b,Acvrl1,Adam10,Adar,Akap10,Akap17b,Alas1,Aldh1a2,Anapc4,Ankrd11,Apc,Aplp2,Apob,Arap3,Arhgap1,Arhgap35,Arid1a,Arih2,Arl8b,Atp2c1,Atp7a,Axin1,B4galt5,Bap1,Becn1,Bicral,Bmp4,Brca2,Brd4,Bub1b,C1galt1c1,C330007P06Rik,Casc3,Casp8,Cc2d2a,Ccdc134,Ccm2,Ccnc,Cdc20,Cdc25a,Cdh2,Cenpc1,Cenpu,Cfl1,Chm,Chmp5,Chrd,Ciapin1,Col4a3bp,Commd1,Cops3,Cops5,Cops8,Coq7,Cox4i1,Cpox,Cryb…
MP:0008415	abnormal neurite morphology	1.31e-06	0.000544	204	4028	Common	Acp2,Adgrg6,Agtpbp1,Als2,Ank2,Ank3,App,Arcn1,Arhgef15,Arhgef6,Atg5,Atg7,Atm,Bace1,Basp1,Bcl2l2,Bdnf,Bicd2,C3,Cacna1a,Cadm4,Cadps,Camk4,Canx,Caprin1,Cav1,Ccdc88a,Ccnd2,Cd47,Cd86,Cers2,Cfl1,Chl1,Chmp2b,Chp1,Ckap5,Clcn6,Cnp,Cntn1,Cntnap1,Coq9,Csf1,Cul4b,Cyfip2,Cyth1,Dact1,Dag1,Dbn1,Dclk1,Depdc5,Dlg1,Dlg4,Dnm1l,Dpysl2,Dpysl3,Dpysl5,Dync1li1,Ebf2,Efnb1,Efnb2,Ehmt1,Ei24,Eif2b5,Eif4h,Epb41l3,Epha4,Epha7…
MP:0005380	embryo phenotype	1.39e-06	0.00055	782	4028	Common	2700049A03Rik,4933427D14Rik,4933434E20Rik,Aatf,Abcb10,Abcb7,Abi1,Acvr1b,Acvrl1,Adam10,Adam17,Adamts9,Adar,Adm,Aggf1,Ahctf1,Akap10,Akap17b,Alas1,Alas2,Aldh1a2,Aldh1a3,Ambra1,Amd1,Anapc4,Ankrd11,Anks6,Apaf1,Apc,Aplp2,Apob,Ar,Arap3,Arhgap1,Arhgap35,Arid1a,Arih2,Arl13b,Arl8b,Armc5,Ate1,Atf2,Atg16l1,Atmin,Atp2c1,Atp6ap1,Atp6v0c,Atp7a,Atr,Axin1,B230118H07Rik,B4galt5,Bap1,Baz1b,Bbs4,Bcl10,Bcl2,Bcor,Becn…
MP:0005397	hematopoietic system phenotype	2.13e-06	0.000772	1455	4028	Common	2310022B05Rik,4933434E20Rik,Abca6,Abcb10,Abcb1a,Abcb6,Abcc4,Abcd1,Abcg2,Abhd12,Abhd16a,Abhd5,Acaa1a,Acer2,Ackr3,Acp2,Acsl3,Acsl4,Acsl5,Actl6a,Acvrl1,Adam10,Adam17,Adam8,Adamts6,Adamts7,Adar,Add1,Add2,Adgre5,Adipoq,Adm,Adpgk,Agap1,Agpat1,Agtpbp1,Agtr1a,Ahr,Aif1,Aimp1,Akap11,Akap12,Akap9,Akna,Akr1a1,Alas2,Aldh1a2,Aldh2,Aldh3a2,Alox5,Alox5ap,Ampd3,Angel1,Ank,Ank1,Ankrd11,Ankrd27,Ano10,Ano6,Anxa7,Anx…
MP:0000877	abnormal Purkinje cell morphology	2.14e-06	0.000772	112	4028	Common	Aars,Acp2,Adamts4,Agtpbp1,Als2,Ank1,Ank3,Arcn1,Arsg,Atf2,Atg5,Atg7,Atm,Atp7a,Atr,Bcl2l2,Bicd2,Bmi1,Cacna1a,Camk4,Camta1,Ccnd2,Chp1,Cntn1,Cntnap1,Cp,Ctnna2,Cxcr4,Dnm1l,Dpysl5,Ebf2,Egfr,Ei24,Erbb3,Fbxw7,Fmr1,Foxp2,Fzd4,Gas1,Gba,Glrb,Gnptab,Herc1,Hgsnat,Hsd17b4,Inpp4a,Ip6k3,Ireb2,Itpr1,Ldb1,Lrp8,Lyst,Map1a,Map1b,Map2,Map2k4,Mapk8ip2,Mfn2,Mtcl1,Myh10,Myo5a,Ncoa1,Nfasc,Npc1,Npc2,Nr1d1,Nsdhl,Numb,Pex13…
MP:0002083	premature death	2.26e-06	0.000782	555	4028	Common	4930453N24Rik,Abca5,Abcb1a,Abcc9,Abhd5,Acadl,Acadvl,Ackr3,Acss1,Actl6a,Acvrl1,Adam17,Adam19,Adarb1,Aebp1,Aggf1,Agl,Ahi1,Ahr,Akap10,Akap12,Aldh2,Amph,Ank,Ank1,Ank2,Ank3,Antxr2,Ap3b1,Apaf1,Apc,App,Aprt,Arhgap1,Arid4a,Arl13b,Arntl,Asl,Aspa,Ass1,Asxl2,Atad1,Atad5,Ate1,Atg5,Atg7,Atm,Atmin,Atp7a,Atr,Atrn,B3gnt5,B4galt1,Bad,Bag3,Bckdk,Bcl2,Bcl6,Bdnf,Becn1,Bicc1,Bicd2,Bloc1s6,Bmi1,Bpnt1,Brca2,Bsn,Bub1b,C…
MP:0005385	cardiovascular system phenotype	2.79e-06	0.000879	1145	4028	Common	2700049A03Rik,4933434E20Rik,AI464131,Aars,Aars2,Abca3,Abca5,Abcb10,Abcb1a,Abcb7,Abcb8,Abcc4,Abcc9,Abhd5,Abi1,Acacb,Acadl,Acadm,Acadvl,Ackr3,Acp1,Acsl4,Acsl5,Acta2,Actr8,Acvrl1,Adam10,Adam15,Adam17,Adam19,Adam9,Adamts12,Adamts6,Adamts7,Adamts9,Adar,Add2,Add3,Adgrg6,Adgrl3,Adipoq,Adm,Adsl,Aebp1,Aggf1,Agpat1,Agtr1a,Ahr,Aif1,Ak1,Akap10,Akap12,Akap17b,Akap6,Aldh1a2,Aldob,Alg10b,Alox5,Amotl2,Angptl4,An…
MP:0004196	abnormal prenatal growth/weight/body size	2.86e-06	0.000879	497	4028	Common	4933427D14Rik,Aatf,Abcb7,Abi1,Acvr1b,Acvrl1,Adam10,Adam17,Adar,Akap10,Akap17b,Alas1,Aldh1a2,Anapc4,Ank1,Ankrd11,Anks6,Ano6,Apc,Aplp2,Apob,Arap3,Arhgap1,Arhgap35,Arid1a,Arih2,Arl8b,Atmin,Atp2c1,Atp7a,Axin1,B4galt5,Bap1,Baz1b,Becn1,Bicral,Bmp4,Bmper,Brca2,Brd4,Brpf1,Bub1b,C1galt1c1,C3,C330007P06Rik,Cadm1,Caprin1,Carm1,Casc3,Casp8,Cc2d2a,Ccdc134,Ccm2,Ccnc,Cdc20,Cdc25a,Cdh2,Celf4,Cenpc1,Cenpj,Cenpu,C…
MP:0000266	abnormal heart morphology	2.96e-06	0.000879	644	4028	Common	2700049A03Rik,4933434E20Rik,Aars,Aars2,Abca5,Abcb8,Abcc9,Abhd5,Abi1,Acacb,Acadl,Acadm,Acadvl,Ackr3,Acsl4,Acsl5,Acvrl1,Adam10,Adam17,Adam19,Adamts6,Adamts9,Adgrg6,Adgrl3,Adipoq,Adm,Agtr1a,Ahr,Akap12,Akap6,Aldh1a2,Aldob,Alg10b,Ank1,Ankrd1,Ankrd26,Anks6,Ap2b1,Ap4e1,Apc,Ar,Arhgef15,Arid1a,Arid1b,Arntl,Asl,Asxl2,Ate1,Atg16l1,Atg5,Atmin,Atp1b1,Atp6ap2,Atr,Axin1,Bag3,Baz1b,Bbx,Bcl6,Bcor,Becn1,Bicc1,Bicr…
MP:0002182	abnormal astrocyte morphology	2.96e-06	0.000879	97	4028	Common	Abcd1,Acp2,Aldh2,Als2,App,Arsg,Aspa,Aspm,Atg7,Atmin,Atp13a2,Atr,Atrn,Bmp4,Cadm1,Canx,Cav1,Ccm2,Cd81,Clcn3,Cln6,Coq9,Cp,Dag1,Depdc5,Ei24,Eif2b4,Eif2b5,Ercc8,Fgfr2,Fig4,Folh1,Galc,Gba,Gls,Gnptab,Gns,Grn,Hax1,Hgsnat,Hsd17b4,Htt,Itgb8,Kcna1,Kcnq3,Ldlr,Lif,Lig3,Ltn1,Map2k1,Mapk1,Mgrn1,Mpp5,Mt3,Ncdn,Ndrg2,Nf1,Nfe2l2,Npc1,Pdcd10,Pdcd6ip,Pdgfb,Pea15a,Pex13,Pi4k2a,Plp1,Pomt2,Ppt1,Psap,Psmc4,Pten,Ptpn6,Rb1…
MP:0001614	abnormal blood vessel morphology	3.57e-06	0.00102	531	4028	Common	4933434E20Rik,Abca3,Abca5,Abcc9,Abi1,Acadm,Ackr3,Acta2,Acvrl1,Adam10,Adam15,Adam17,Adam19,Adam9,Adamts12,Adamts7,Adipoq,Adm,Adsl,Aebp1,Aggf1,Agtr1a,Ahr,Aldh1a2,Amotl2,Angptl4,Ank,Anks6,Antxr2,Anxa3,Ap1b1,Ap1g1,Ap2b1,Arap3,Arhgef15,Arhgef26,Arid1a,Arntl,Arsg,Ate1,Atf2,Atg16l1,Atmin,Atp7a,B4galt1,Bach1,Baz1b,Bbs4,Bcam,Bcl2,Bmp4,Bmper,C1galt1c1,Cacnb3,Calcrl,Capn2,Capns1,Capza2,Casp3,Casp8,Casz1,Cav…
MP:0001697	abnormal embryo size	4.23e-06	0.00117	319	4028	Common	4933427D14Rik,Aatf,Acvr1b,Adam10,Adar,Akap10,Akap17b,Aldh1a2,Anapc4,Ankrd11,Apc,Apob,Arap3,Arhgap1,Arhgap35,Arid1a,Arih2,Arl8b,Atp2c1,Atp7a,Axin1,B4galt5,Becn1,Brca2,Casc3,Casp8,Cc2d2a,Ccdc134,Cdc20,Cenpu,Cfl1,Chmp5,Chrd,Ciapin1,Col4a3bp,Commd1,Cops5,Cops8,Coq7,Cox4i1,Crybg1,Cse1l,Csk,Ctbp2,Ctgf,Cubn,Cul1,Cul3,Cul4b,Cul7,Dab2,Dag1,Dap3,Daxx,Dbn1,Ddrgk1,Ddx54,Dicer1,Disp1,Dld,Dlg1,Dnm1l,Dpf2,Dph3,…
MP:0000259	abnormal vascular development	4.84e-06	0.00127	254	4028	Common	4933434E20Rik,Abi1,Acvrl1,Adam10,Adamts12,Adamts7,Adm,Aggf1,Ahr,Aldh1a2,Angptl4,Arap3,Arhgef15,Arid1a,Ate1,Atg16l1,Atp7a,B4galt1,Bmp4,Capn2,Capns1,Casp8,Cav2,Ccdc134,Ccdc88a,Ccl2,Ccm2,Cd44,Cd47,Cd82,Cdh2,Celf4,Chd7,Chm,Chrd,Chst11,Clic4,Cmip,Col4a3bp,Commd9,Coro1c,Crim1,Csk,Ctbp2,Ctgf,Ctss,Cubn,Cul4b,Cul7,Cxcr4,Cyr61,Dcbld2,Ddah1,Dicer1,Disp1,Dll4,Dock4,Dstn,Ecscr,Edn1,Ednra,Efnb2,Enpp2,Ep300,Eph…
MP:0011096	embryonic lethality between implantation and somite formation, complete penetrance	4.89e-06	0.00127	147	4028	Common	Abcb7,Abce1,Acly,Adamts9,Ahctf1,Amd1,Arid1a,Atoh8,Atr,Becn1,Bmp4,Bub1b,Bub3,Bysl,Caml,Cdan1,Cdc20,Cdc25a,Cdc7,Cenpe,Chka,Chmp4b,Clns1a,Cops2,Cops5,Cops6,Cse1l,Cul1,Cul3,Dhx29,Dhx36,Dhx9,Dicer1,Dld,Dnaja3,Dpagt1,Drap1,Dsp,Dync1h1,E4f1,Espl1,Ezh2,Fbn1,Fermt2,Fgfr2,Flcn,Gadd45gip1,Gata6,Gclc,Gmnn,Gnl3,Grb2,Hinfp,Hnrnpc,Hsp90b1,Ilk,Ints6,Kat8,Kdm1a,Knl1,Kpnb1,Lamb1,Lamc1,Lamtor1,Lims1,Ltbp2,Mad2l1,Ma…
MP:0012064	abnormal astrocyte number	7.99e-06	0.00201	69	4028	Common	Abcd1,Acp2,Aldh2,Als2,App,Arsg,Aspa,Atg7,Atmin,Atp13a2,Atrn,Bmp4,Canx,Cav1,Cd81,Clcn3,Cln6,Coq9,Dag1,Depdc5,Ei24,Ercc8,Fig4,Folh1,Galc,Gba,Gnptab,Gns,Grn,Hax1,Hgsnat,Hsd17b4,Htt,Kcnq3,Ltn1,Map2k1,Mapk1,Mgrn1,Mpp5,Ndrg2,Nf1,Nfe2l2,Npc1,Pdcd10,Pdcd6ip,Pex13,Pi4k2a,Plp1,Pomt2,Ppt1,Psap,Psmc4,Pten,Rb1,Rhot1,S1pr1,Scarb2,Scyl2,Slc33a1,Smo,Snca,Sncg,Sod1,Spg11,Tsc2,Tspan2,Vegfa,Wasl,Zfyve26
MP:0001698	decreased embryo size	9.69e-06	0.00235	268	4028	Common	Aatf,Adam10,Akap17b,Aldh1a2,Ankrd11,Apc,Apob,Arap3,Arhgap1,Arhgap35,Arid1a,Arl8b,Atp2c1,Atp7a,Axin1,B4galt5,Becn1,Brca2,Casc3,Casp8,Cc2d2a,Ccdc134,Cdc20,Cenpu,Cfl1,Chmp5,Chrd,Ciapin1,Col4a3bp,Commd1,Cops5,Cops8,Coq7,Cse1l,Csk,Ctbp2,Ctgf,Cubn,Cul1,Cul3,Cul4b,Cul7,Dab2,Dag1,Dap3,Daxx,Ddrgk1,Dicer1,Disp1,Dld,Dlg1,Dnm1l,Dph3,Dpy30,Dsp,E4f1,Efnb2,Egfr,Ehmt1,Ehmt2,Emg1,Enpp2,Ep300,Erg,Exoc4,F3,Fam20b,F…
MP:0001545	abnormal hematopoietic system physiology	1e-05	0.00235	713	4028	Common	Abcb1a,Abcb6,Abhd16a,Actl6a,Adam10,Adam17,Add2,Adipoq,Ahr,Akr1a1,Alox5,Alox5ap,Ampd3,Ank1,Ano6,Anxa7,Anxa8,Ap3b1,Apc,Apex2,Apobec3,Appl1,Arhgap15,Arhgap25,Arhgdib,Arhgef3,Arhgef6,Arid1a,Arntl,Arrb2,Atf3,Atg16l1,Atg3,Atg5,Atg7,Atm,Atmin,Atp6v1h,Atr,Azi2,B2m,B3gnt2,B3gnt5,B4galt1,B4gat1,Bad,Bag4,Bak1,Bap1,Batf,Bax,Bbs4,Bbx,Bcat1,Bcl10,Bcl2,Bcl2l1,Bcl3,Bcl6,Bcl6b,Bcor,Becn1,Bhlhe40,Bid,Birc2,Birc3,B…
MP:0012065	increased astrocyte number	1.02e-05	0.00235	67	4028	Common	Abcd1,Acp2,Aldh2,Als2,App,Arsg,Aspa,Atg7,Atmin,Atp13a2,Atrn,Bmp4,Canx,Cav1,Cd81,Clcn3,Cln6,Coq9,Dag1,Depdc5,Ei24,Ercc8,Fig4,Galc,Gba,Gnptab,Gns,Grn,Hax1,Hgsnat,Hsd17b4,Htt,Kcnq3,Ltn1,Map2k1,Mapk1,Mgrn1,Mpp5,Nf1,Nfe2l2,Npc1,Pdcd10,Pdcd6ip,Pex13,Pi4k2a,Plp1,Pomt2,Ppt1,Psap,Psmc4,Pten,Rb1,Rhot1,S1pr1,Scarb2,Scyl2,Slc33a1,Smo,Snca,Sncg,Sod1,Spg11,Tsc2,Tspan2,Vegfa,Wasl,Zfyve26
MP:0003354	astrocytosis	1.11e-05	0.0025	64	4028	Common	Abcd1,Acp2,Aldh2,Als2,App,Arsg,Aspa,Atg7,Atmin,Atp13a2,Atrn,Canx,Cav1,Clcn3,Cln6,Coq9,Dag1,Depdc5,Ei24,Ercc8,Fig4,Galc,Gba,Gnptab,Gns,Grn,Hax1,Hgsnat,Hsd17b4,Htt,Kcnq3,Ltn1,Mapk1,Mgrn1,Mpp5,Nf1,Nfe2l2,Npc1,Pdcd10,Pdcd6ip,Pex13,Pi4k2a,Plp1,Pomt2,Ppt1,Psap,Psmc4,Pten,Rb1,Rhot1,S1pr1,Scarb2,Scyl2,Slc33a1,Smo,Snca,Sncg,Sod1,Spg11,Tsc2,Tspan2,Vegfa,Wasl,Zfyve26
MP:0001672	abnormal embryo development	1.53e-05	0.00333	435	4028	Common	2700049A03Rik,Aatf,Abcb7,Abi1,Acvr1b,Acvrl1,Adamts9,Adar,Akap17b,Alas1,Aldh1a2,Amd1,Anapc4,Ankrd11,Apc,Aplp2,Apob,Arap3,Arhgap35,Arid1a,Arl13b,Armc5,Ate1,Atp2c1,Atp6ap1,Atp6v0c,Axin1,Bap1,Bcor,Becn1,Bicral,Bmp4,Bmper,Brca2,Brd4,Brpf1,Bub1b,C1galt1c1,C330007P06Rik,Capn2,Casc3,Cc2d2a,Ccm2,Ccnc,Cdc20,Cdc25a,Cdh2,Cdk11b,Cdk20,Cdk8,Cenpc1,Cenpj,Cep120,Chd7,Chm,Chmp5,Chrd,Cluap1,Cnot9,Commd1,Cops2,Cops…
MP:0011092	embryonic lethality, complete penetrance	1.72e-05	0.0036	189	4028	Common	Abcb10,Abi1,Actl6a,Acvr1b,Aldh1a2,Apc,Aplp2,Arid4b,Arrdc3,Atm,Axin1,Bmp4,Brca2,Brd4,Brpf1,Bub1b,Cacnb2,Capns1,Casp8,Cbfb,Cenpc1,Chd7,Chordc1,Ckap5,Cox15,Cpt1a,Crkl,Csnk1a1,Ctnnbl1,Cul5,Cyfip1,Dab2,Dbi,Dcaf1,Dctn1,Ddx24,Derl1,Dhx30,Dicer1,Disp1,Dnm2,Dock4,Dph1,Drosha,E2f3,Efnb2,Egfr,Eif3m,Erc1,Espl1,Etv5,Exoc5,Extl3,Ezh2,Fam20b,Fbn1,Fbxl5,Fbxw7,Flcn,Fmnl1,Gak,Gata2,Gata6,Gclc,Gdf3,Gga2,Glul,Gnl3,G…
MP:0010866	abnormal prenatal body size	1.73e-05	0.0036	376	4028	Common	4933427D14Rik,Aatf,Acvr1b,Adam10,Adam17,Adar,Akap10,Akap17b,Aldh1a2,Anapc4,Ank1,Ankrd11,Ano6,Apc,Apob,Arap3,Arhgap1,Arhgap35,Arid1a,Arih2,Arl8b,Atmin,Atp2c1,Atp7a,Axin1,B4galt5,Baz1b,Becn1,Bmper,Brca2,C3,Cadm1,Caprin1,Carm1,Casc3,Casp8,Cc2d2a,Ccdc134,Cdc20,Cenpj,Cenpu,Cfl1,Chmp5,Chrd,Ciapin1,Cntrl,Col4a3bp,Commd1,Cops5,Cops8,Coq7,Cox4i1,Crybg1,Cse1l,Csk,Csnk1d,Ctbp2,Ctgf,Cubn,Cul1,Cul3,Cul4b,Cul7…
MP:0014134	abnormal embryo morphology	1.82e-05	0.00368	582	4028	Common	2700049A03Rik,4933427D14Rik,4933434E20Rik,Aatf,Abcb7,Abi1,Acvr1b,Acvrl1,Adam10,Adam17,Adamts9,Adar,Ahctf1,Akap10,Akap17b,Aldh1a2,Aldh1a3,Ambra1,Anapc4,Ankrd11,Anks6,Apaf1,Apc,Apob,Ar,Arap3,Arhgap1,Arhgap35,Arid1a,Arih2,Arl13b,Arl8b,Armc5,Atmin,Atp2c1,Atp6v0c,Atp7a,Axin1,B4galt5,Baz1b,Bbs4,Bcl10,Bcor,Becn1,Bicc1,Bloc1s2,Bmp1,Bmp4,Brca2,Brd4,Brpf1,Bub1b,Bub3,C3,Casc3,Casp8,Casp9,Cc2d2a,Ccdc134,Ccm2…
MP:0002451	abnormal macrophage physiology	1.96e-05	0.00388	194	4028	Common	Abhd16a,Adam17,Ahr,Akr1a1,Atg16l1,Atm,Atp6v1h,B3gnt2,B4galt1,Bag4,Bcl2,Bcl3,Birc3,Btk,C9orf72,Camk2g,Casp3,Casp4,Cav1,Ccl2,Ccr1,Ccr5,Cd14,Cd163,Cd36,Cd44,Cd81,Cdkn1a,Chuk,Ciita,Clcn3,Clec4e,Clic4,Cln3,Cnmd,Cnpy3,Coro1a,Cry2,Csf1,Ctsl,Cx3cr1,Ddit3,Dock3,Eif2ak4,Eif2b5,Ero1l,Esr1,F3,Fads2,Fas,Fblim1,Fcgr1,Fmnl1,Fosl2,Galc,Gbp2b,Gnptab,Gpr65,Grk6,Grn,Gsdmd,Gsn,H2-Aa,H2-Ab1,Hck,Hivep3,Hnrnpd,Hsp90b1,…
MP:0000807	abnormal hippocampus morphology	2.6e-05	0.00502	166	4028	Common	Abcb1a,Agtpbp1,Akt3,Aldh2,Ank3,Ap3m2,App,Arfgef1,Arid1b,Arl6,Arsg,Atg5,Atg7,Atp7a,Bad,Basp1,Bbs1,Bbs2,Bbs4,Bdnf,Bicd2,Bid,Bmi1,Brpf1,Btg1,C3,Cadm1,Cadps,Cav1,Ccdc88a,Cd81,Cdk5,Cdk5rap2,Cdkn1b,Cenpj,Cers2,Cers6,Chd7,Chl1,Chmp2b,Chn2,Ckap5,Ckb,Clcn3,Cln3,Cox10,Cplx2,Csf1,Ctnna2,Cxcr4,Dag1,Dbn1,Dgkb,Dlg4,Dpysl3,Ehmt1,Ei24,Eno2,Fabp7,Fkrp,Fmr1,Folh1,Gak,Gba,Gdi1,Gja1,Gnptab,Gpt2,Gria2,Hdac2,Hsd11b1,H…
MP:0005016	decreased lymphocyte cell number	2.93e-05	0.00554	441	4028	Common	4933434E20Rik,Abcb1a,Ackr3,Acp2,Acsl3,Actl6a,Adam10,Adam17,Adm,Adpgk,Akap9,Aldh2,Ap1g1,Ap4e1,Apc,Apex2,Arhgap15,Arhgap17,Arhgdib,Arhgef6,Arid1b,Arid4a,Arid5a,Arid5b,Arntl,Arsg,Asl,Aspm,Atg16l2,Atg3,Atg5,Atg7,Atm,Atmin,Atp13a2,Atp5f1,Atr,B2m,B3gnt5,Bad,Bag3,Bap1,Batf,Bcl10,Bcl2,Bcl2l1,Bcl3,Bcl6,Bcl6b,Becn1,Bhlhe40,Birc2,Birc3,Bmf,Bmi1,Brpf1,Bst1,Btk,C9orf72,Cacybp,Cadm1,Calcrl,Caml,Casp3,Casp8,Cbf…
MP:0012382	abnormal blood cell physiology	3.26e-05	0.00602	667	4028	Common	Abcb1a,Abcb6,Abhd16a,Adam10,Adam17,Add2,Adipoq,Ahr,Akr1a1,Alox5,Alox5ap,Ampd3,Ank1,Ano6,Anxa7,Anxa8,Ap3b1,Apc,Apobec3,Appl1,Arhgap15,Arhgap25,Arhgdib,Arhgef3,Arhgef6,Arntl,Arrb2,Atf3,Atg16l1,Atg3,Atg5,Atm,Atmin,Atp6v1h,B2m,B3gnt2,B3gnt5,B4galt1,B4gat1,Bad,Bag4,Bak1,Batf,Bax,Bbs4,Bbx,Bcat1,Bcl10,Bcl2,Bcl2l1,Bcl3,Bcl6,Bcl6b,Becn1,Bhlhe40,Birc2,Birc3,Bloc1s4,Bloc1s5,Bloc1s6,Bmf,Bmi1,Bnip3l,Brca2,Bst…
MP:0011180	abnormal hematopoietic cell number	3.34e-05	0.00602	857	4028	Common	2310022B05Rik,4933434E20Rik,Abcb10,Abcb1a,Ackr3,Acp2,Acsl3,Acsl4,Acsl5,Actl6a,Adam10,Adam17,Adam8,Adamts7,Add1,Add2,Adgre5,Adipoq,Adm,Adpgk,Agap1,Agtr1a,Aif1,Aimp1,Akap11,Akap9,Akna,Akr1a1,Alas2,Aldh2,Aldh3a2,Ampd3,Ank1,Ankrd11,Ankrd27,Ano10,Anxa7,Ap1g1,Ap4e1,Apc,Apex2,Apoo,Ar,Arhgap15,Arhgap17,Arhgap22,Arhgap25,Arhgdib,Arhgef6,Arid1a,Arid1b,Arid4a,Arid5a,Arid5b,Arntl,Arrb2,Arsg,Asl,Aspm,Atad5,At…
MP:0009956	abnormal cerebellar layer morphology	3.56e-05	0.0063	142	4028	Common	Aars,Acp2,Adamts4,Agtpbp1,Ahi1,Akap12,Akt3,Als2,Ank1,Ank3,Arcn1,Arsg,Ass1,Astn1,Atf2,Atg5,Atg7,Atm,Atp7a,Atr,Bcl2l2,Bicd2,Bmi1,Cacna1a,Cadps,Camk4,Camta1,Car8,Casp3,Ccnd2,Cers2,Chp1,Cln3,Cntn1,Cntnap1,Cp,Ctnna2,Cxcr4,Dner,Dnm1l,Dpysl5,Ebf2,Egfr,Ei24,Eif2b5,Eno2,Erbb3,Fbxw7,Fmr1,Foxp2,Fzd4,Gas1,Gba,Gja1,Gli2,Glrb,Gnptab,Herc1,Hgsnat,Hsd17b4,Inpp4a,Ip6k3,Ireb2,Itpr1,Ldb1,Lgi1,Lig3,Lpin2,Lrp8,Lyst,M…
MP:0005405	axon degeneration	4.43e-05	0.00764	55	4028	Common	Abcd1,Als2,App,Aspa,Atg7,Chl1,Chp1,Cisd2,Cln6,Cln8,Cnp,Dock3,Ei24,Galc,Gars,Gnptab,Hsd17b4,Itga6,Kif5a,Klc1,Lmnb1,Lpin1,Mtcl1,Mtmr2,Nefh,Nefm,Nf1,Nmnat2,Npc1,Opa3,Pik3c3,Pla2g6,Plp1,Pmp22,Psap,Rab18,Reep1,Sacs,Slc12a6,Slc33a1,Slc9a1,Smarcb1,Snca,Spg11,Spg7,Stmn1,Stxbp1,Tbce,Tfam,Ube4b,Uchl1,Usp14,Vapb,Vegfa,Zfyve26
MP:0002396	abnormal hematopoietic system morphology/development	4.51e-05	0.00764	1241	4028	Common	2310022B05Rik,4933434E20Rik,Abca6,Abcb10,Abcb1a,Abcb6,Abcc4,Abcd1,Abcg2,Abhd12,Abhd5,Acaa1a,Ackr3,Acp2,Acsl3,Acsl4,Acsl5,Actl6a,Acvrl1,Adam10,Adam17,Adam8,Adamts6,Adamts7,Adar,Add1,Add2,Adgre5,Adipoq,Adm,Adpgk,Agap1,Agpat1,Agtr1a,Ahr,Aif1,Aimp1,Akap11,Akap12,Akap9,Akna,Akr1a1,Alas2,Aldh1a2,Aldh2,Aldh3a2,Alox5,Ampd3,Angel1,Ank,Ank1,Ankrd11,Ankrd27,Ano10,Ano6,Anxa7,Ap1b1,Ap1g1,Ap2b1,Ap3b1,Ap4e1,Apb…
MP:0000260	abnormal angiogenesis	4.86e-05	0.00807	190	4028	Common	4933434E20Rik,Abi1,Acvrl1,Adam10,Adamts12,Adm,Aggf1,Ahr,Aldh1a2,Angptl4,Arap3,Arhgef15,Arid1a,Ate1,Atg16l1,B4galt1,Bmp4,Cav2,Ccdc88a,Ccl2,Ccm2,Cd44,Cd47,Cd82,Celf4,Chd7,Chm,Chrd,Chst11,Clic4,Cmip,Col4a3bp,Commd9,Coro1c,Crim1,Ctgf,Ctss,Cxcr4,Cyr61,Dcbld2,Ddah1,Dicer1,Dll4,Dock4,Dstn,Edn1,Ednra,Efnb2,Epha2,Ephb4,Ephx2,Erg,Esam,F11r,Fbln5,Fbxw7,Flna,Flnb,Flt4,Folh1,Fstl1,Furin,Fzd4,G6pdx,Gna13,Gpc3,…
MP:0002419	abnormal innate immunity	5.7e-05	0.00923	278	4028	Common	Abhd16a,Adam17,Ahr,Akr1a1,Alox5,Alox5ap,Arhgap15,Arhgap25,Arntl,Atg16l1,Atg9a,Atm,Atp6v1h,B3gnt2,B4galt1,Bag4,Bcl2,Bcl3,Birc3,Bloc1s6,Btk,C3,C9orf72,Camk2g,Casp3,Casp4,Cav1,Ccl2,Ccr1,Ccr5,Cd14,Cd163,Cd36,Cd44,Cd47,Cd59a,Cd81,Cdkn1a,Cebpg,Cfp,Chuk,Ciita,Clcn3,Clec4e,Clic4,Cln3,Cnmd,Cnpy3,Coro1a,Cry2,Csf1,Ctsc,Ctsl,Cttn,Cx3cr1,Cxcr4,Ddit3,Dock2,Dock3,Edil3,Eif2ak4,Eif2b5,Elf4,Ero1l,Esr1,F3,Fads2,Fa…
MP:0003202	abnormal neuron apoptosis	5.78e-05	0.00923	124	4028	Common	Akt3,Apaf1,App,Arfgef1,Arhgap1,Astn1,Atg7,Atp7a,Atr,B3gnt2,Bag6,Bax,Bbs1,Bcl2l1,Bdnf,Btg1,Caprin1,Cask,Casp2,Casp3,Casp9,Cast,Ccl2,Cdk5rap2,Copb2,Coq9,Cx3cr1,Dapk1,Ddb1,Ddit3,Dnm1l,Ei24,Elavl4,Eno2,Erbb3,Fas,Gclm,Gria2,Grn,Hax1,Hnrnpab,Ikbkap,Il34,Jun,Kdm2a,Kidins220,Lancl1,Lbr,Lig4,Mad2l2,Maged1,Maob,Map3k12,Mapk10,Mapk8ip1,Mbp,Mcph1,Med1,Mfn2,Mocs2,Mpp5,Ndfip1,Ndrg2,Ngfr,Nos3,Nova1,Nr4a3,Oxr1,P…
MP:0013656	abnormal hematopoietic cell morphology	6.84e-05	0.0107	1108	4028	Common	2310022B05Rik,4933434E20Rik,Abca6,Abcb10,Abcb1a,Abcb6,Abcd1,Abhd12,Abhd5,Acaa1a,Ackr3,Acp2,Acsl3,Acsl4,Acsl5,Actl6a,Acvrl1,Adam10,Adam17,Adam8,Adamts7,Adar,Add1,Add2,Adgre5,Adipoq,Adm,Adpgk,Agap1,Agpat1,Agtr1a,Ahr,Aif1,Aimp1,Akap11,Akap9,Akna,Akr1a1,Alas2,Aldh2,Aldh3a2,Ampd3,Angel1,Ank,Ank1,Ankrd11,Ankrd27,Ano10,Ano6,Anxa7,Ap1g1,Ap3b1,Ap4e1,Apbb2,Apc,Apex2,Apoo,App,Appl1,Appl2,Aprt,Ar,Arhgap1,Arh…
MP:0002420	abnormal adaptive immunity	7.56e-05	0.0116	639	4028	Common	Abcb1a,Abhd16a,Adam17,Adipoq,Ahr,Akr1a1,Alox5,Alox5ap,Anxa8,Apc,Apobec3,Appl1,Arhgap15,Arhgap25,Arhgdib,Arhgef6,Arih2,Arntl,Arrb2,Asb2,Atf3,Atg16l1,Atg3,Atg5,Atm,Atmin,Atp6v1h,Azi2,B2m,B3gnt2,B3gnt5,B4galt1,B4gat1,Bad,Bag4,Batf,Bax,Bbs4,Bbx,Bcat1,Bcl10,Bcl2,Bcl2l1,Bcl3,Bcl6,Bcl6b,Becn1,Bhlhe40,Birc2,Birc3,Bloc1s6,Bmf,Bmi1,Brca2,Bst1,Btk,Bub1b,C1qtnf3,C3,C9orf72,Cacnb3,Cadm1,Camk2g,Caml,Capn1,Casp…
MP:0003077	abnormal cell cycle	7.78e-05	0.0117	148	4028	Common	Aspm,Atm,Atr,B3gat3,B4galt1,Bmi1,Brca2,Brpf1,Btrc,Bub1b,Bub3,Cacybp,Casz1,Ccnc,Cdc20,Cdc25a,Cdc7,Cdk2,Cdk5rap2,Cdkn1a,Cenpc1,Cenpe,Cenpj,Chek2,Chfr,Cops5,Cops8,Ctnna1,Cul3,Cul4a,Dcaf1,Dhx36,Dicer1,Dph1,E2f3,E4f1,Ednrb,Eef1e1,Eif6,Espl1,Eya1,Fign,Fntb,Foxk1,Gas2l3,Gigyf2,Glrx3,Gmnn,Gnl3,Hand2,Hat1,Haus6,Hdac3,Hmgn1,Hus1,Ift122,Ilk,Ing1,Jdp2,Kat14,Kat8,Katnb1,Kdm1a,Kmt5a,Lats2,Lig3,Lin9,Lzts1,Mad2l…
MP:0003634	abnormal glial cell morphology	8.01e-05	0.0119	191	4028	Common	Abcd1,Abhd12,Acot7,Acp2,Adam22,Adamts4,Adgrg1,Adgrg6,Adk,Aldh2,Aldh5a1,Als2,App,Arsg,Aspa,Aspm,Atg7,Atmin,Atp13a2,Atr,Atrn,B4gat1,Bad,Basp1,Bid,Bloc1s2,Bmi1,Bmp4,Brpf1,Cadm1,Canx,Cav1,Ccm2,Cd81,Cdh2,Cdkn1b,Cers6,Clcn3,Cln3,Cln6,Cln8,Cnp,Cntn1,Coq9,Cox10,Cp,Csf1,Cx3cr1,Dag1,Depdc5,Dnajc5,Dner,Ei24,Eif2b4,Eif2b5,Erbb3,Ercc8,Ezh2,Fgfr2,Fig4,Fkrp,Folh1,Foxp2,Galc,Gba,Gja1,Gls,Gnptab,Gns,Gria2,Grn,Hax…
MP:0002442	abnormal leukocyte physiology	8.23e-05	0.0119	613	4028	Common	Abcb1a,Abhd16a,Adam17,Adipoq,Ahr,Akr1a1,Alox5,Alox5ap,Anxa8,Apc,Apobec3,Appl1,Arhgap15,Arhgap25,Arhgdib,Arhgef6,Arntl,Arrb2,Atf3,Atg16l1,Atg3,Atg5,Atm,Atmin,Atp6v1h,B2m,B3gnt2,B3gnt5,B4galt1,B4gat1,Bad,Bag4,Batf,Bax,Bbs4,Bbx,Bcat1,Bcl10,Bcl2,Bcl2l1,Bcl3,Bcl6,Bcl6b,Becn1,Bhlhe40,Birc2,Birc3,Bloc1s6,Bmf,Bmi1,Brca2,Bst1,Btk,Bub1b,C1qtnf3,C3,C9orf72,Cacnb3,Cadm1,Camk2g,Caml,Capn1,Casp2,Casp3,Casp4,Ca…
MP:0008942	abnormal induced cell death	8.32e-05	0.0119	118	4028	Common	Abcc9,Adar,Aldh2,Antxr2,Apaf1,Apbb1,Apex2,Appl1,Atf6b,Atm,Atmin,Atr,Bad,Bcl2l1,Brca2,Casp3,Casp9,Ccng1,Ccs,Cd44,Cdc25a,Cdkn1a,Chek2,Ciz1,Cops6,Cp,Cul4a,Cul9,Dapk1,Ddb2,Dph1,Dusp6,Eef2k,Endog,Ercc1,Ercc3,Ercc8,Ero1l,Fancd2,Fen1,Gclm,Glrx,Gpx7,Hells,Hint1,Hipk1,Hmgn1,Hspa1a,Ift122,Ikbkb,Ing1,Irf3,Ivns1abp,Jun,Kat8,Lig4,Mapkap1,Mbd4,Mcph1,Mdc1,Mre11a,Mta1,Mtf1,Nabp2,Ndrg1,Nfe2l2,Noa1,Nus1,Oma1,Parp1…
MP:0005387	immune system phenotype	8.98e-05	0.0126	1492	4028	Common	2310022B05Rik,4933434E20Rik,AU040320,Abcb1a,Abcc4,Abcd1,Abcg2,Abhd12,Abhd16a,Abhd5,Ackr1,Ackr3,Acp1,Acp2,Acsl3,Actl6a,Adam10,Adam17,Adam8,Adamts18,Adamts6,Adamts9,Adar,Adcyap1r1,Add2,Adgre5,Adipoq,Adm,Adpgk,Adprh,Agap1,Agbl5,Agtpbp1,Ahi1,Ahr,Aif1,Aimp1,Akap11,Akap12,Akap9,Akna,Akr1a1,Akt3,Aldh1a2,Aldh2,Aldob,Alox5,Alox5ap,Als2,Amfr,Ampd2,Ampd3,Angptl4,Ank,Ank1,Ankrd11,Ankrd27,Ano10,Antxr2,Anxa7,A…
MP:0000801	abnormal temporal lobe morphology	9.75e-05	0.0134	166	4028	Common	Abcb1a,Agtpbp1,Akt3,Aldh2,Ank3,Ap3m2,App,Arfgef1,Arid1b,Arl6,Arsg,Atg5,Atg7,Atp7a,Bad,Basp1,Bbs1,Bbs2,Bbs4,Bdnf,Bicd2,Bid,Bmi1,Brpf1,Btg1,C3,Cadm1,Cadps,Cav1,Ccdc88a,Cd81,Cdk5,Cdk5rap2,Cdkn1b,Cenpj,Cers2,Cers6,Chd7,Chl1,Chmp2b,Chn2,Ckap5,Ckb,Clcn3,Cln3,Cox10,Cplx2,Csf1,Ctnna2,Cxcr4,Dag1,Dbn1,Dgkb,Dlg4,Dpysl3,Ehmt1,Ei24,Eno2,Fabp7,Fkrp,Fmr1,Folh1,Gak,Gba,Gdi1,Gja1,Gnptab,Gpt2,Gria2,Hdac2,Hsd11b1,H…
MP:0002452	abnormal professional antigen presenting cell physiology	9.81e-05	0.0134	427	4028	Common	Abcb1a,Abhd16a,Adam17,Ahr,Akr1a1,Apobec3,Arhgdib,Arhgef6,Arih2,Arntl,Asb2,Atf3,Atg16l1,Atm,Atmin,Atp6v1h,Azi2,B2m,B3gnt2,B3gnt5,B4galt1,Bad,Bag4,Batf,Bax,Bbs4,Bbx,Bcl10,Bcl2,Bcl2l1,Bcl3,Bcl6,Bhlhe40,Birc3,Bmf,Bmi1,Bst1,Btk,Bub1b,C1qtnf3,C9orf72,Camk2g,Casp2,Casp3,Casp4,Casp8,Cav1,Cbfb,Ccl2,Ccnd3,Ccr1,Ccr5,Cd14,Cd163,Cd180,Cd1d1,Cd200r1,Cd207,Cd274,Cd36,Cd40,Cd44,Cd53,Cd59a,Cd72,Cd74,Cd80,Cd81,Cd8…
MP:0004097	abnormal cerebellar cortex morphology	0.000101	0.0134	157	4028	Common	Aars,Acp2,Adamts4,Adgrg1,Agtpbp1,Ahi1,Akap12,Akt3,Als2,Ank1,Ank3,Arcn1,Arsg,Ass1,Astn1,Atf2,Atg5,Atg7,Atm,Atp7a,Atr,Bcl2l2,Bicd2,Bmi1,Cacna1a,Cadps,Camk4,Camta1,Car8,Casp3,Ccnd2,Cdk5,Cep290,Cers2,Chp1,Cln3,Cntn1,Cntnap1,Cp,Ctnna2,Cxcr4,Dag1,Dner,Dnm1l,Dpysl5,Ebf2,Egfr,Ei24,Eif2b5,Eno2,Erbb3,Fbxw7,Fign,Fkrp,Fmr1,Foxp2,Fzd4,Gas1,Gba,Gja1,Gli2,Glrb,Gnptab,Herc1,Hgsnat,Hsd17b4,Inpp4a,Ip6k3,Ireb2,Itpr…
MP:0001819	abnormal immune cell physiology	0.000102	0.0134	623	4028	Common	Abcb1a,Abhd16a,Adam17,Adipoq,Ahr,Akr1a1,Alox5,Alox5ap,Anxa8,Apc,Apobec3,Appl1,Arhgap15,Arhgap25,Arhgdib,Arhgef6,Arih2,Arntl,Arrb2,Asb2,Atf3,Atg16l1,Atg3,Atg5,Atm,Atmin,Atp6v1h,Azi2,B2m,B3gnt2,B3gnt5,B4galt1,B4gat1,Bad,Bag4,Batf,Bax,Bbs4,Bbx,Bcat1,Bcl10,Bcl2,Bcl2l1,Bcl3,Bcl6,Bcl6b,Becn1,Bhlhe40,Birc2,Birc3,Bloc1s6,Bmf,Bmi1,Brca2,Bst1,Btk,Bub1b,C1qtnf3,C3,C9orf72,Cacnb3,Cadm1,Camk2g,Caml,Capn1,Casp…
MP:0000350	abnormal cell proliferation	0.000113	0.0147	417	4028	Common	Aatf,Acp1,Actl6a,Adam17,Adamts7,Aebp1,Ahctf1,Aifm2,Aldh3a2,Alg2,Ambra1,Apaf1,Apc,Apex2,Arhgap1,Arl13b,Atg7,Atm,Atmin,Atr,Bag6,Barx1,Bbs1,Bcl2,Bcor,Bloc1s2,Bmi1,Bmpr1b,Brca2,Brpf1,Btg1,Btrc,C3,Cacybp,Cadm1,Calcrl,Casz1,Cav1,Ccdc134,Ccdc80,Ccndbp1,Cd163,Cd34,Cd44,Cd74,Cdc20,Cdc25a,Cdk11b,Cdk2,Cdk5rap2,Cdkn1a,Cdkn1b,Cdkn2b,Cdon,Cebpd,Cenpe,Cenpf,Cfl1,Chd7,Chordc1,Chuk,Cib1,Clpp,Col4a3bp,Copb2,Cops2,…
MP:0005404	abnormal axon morphology	0.000119	0.0152	105	4028	Common	Adgrg6,Als2,Ank2,Ank3,App,Atg5,Bace1,Basp1,Cacna1a,Cadm4,Cadps,Canx,Cd47,Cd86,Cers2,Chl1,Chp1,Clcn6,Cnp,Cntnap1,Cyth1,Dag1,Dclk1,Efnb1,Efnb2,Ei24,Eif2b5,Epb41l3,Epha4,Epha7,Fig4,Gabbr1,Galc,Gan,Gap43,Gars,Gldn,Hmbs,Hspa5,Htt,Ireb2,Islr2,Itga6,Kidins220,Kif2a,Klc1,Lama4,Ldlr,Lgi4,Lmnb1,Lpin1,Man2b1,Map1a,Map1b,Mapt,Mbp,Mfn2,Mpz,Mtcl1,Mtor,Nefh,Nefl,Nefm,Nfasc,Nfe2l2,Npc1,Nrcam,Nrd1,Pi4k2a,Pla2g6,P…
MP:0011702	abnormal fibroblast proliferation	0.000121	0.0152	87	4028	Common	Acp1,Alg2,Arhgap1,Atm,Brca2,Btrc,Cacybp,Ccdc80,Cd44,Cdkn1a,Cdkn2b,Ctc1,Dcaf1,Dnm1l,Dok1,Dph1,Ep300,Fen1,Fntb,Glrx3,Gnl3,Hat1,Hint1,Hmgn1,Hsd11b1,Htatip2,Hus1,Igfbp7,Ing1,Jun,Kat2a,Katnb1,Lig4,Lin9,Lum,Lzts1,Mapk1,Mapk3,Mastl,Mcm4,Med1,Med31,Mgea5,Mif,Myc,Ncoa6,Ndrg2,Nono,Npm1,Pak2,Pcbp4,Pdgfrb,Pggt1b,Phc2,Phf14,Pik3ca,Pik3cb,Pml,Polb,Ppp1r13l,Ppp5c,Psme3,Ptk2,Raf1,Rb1,Rbl1,Rbm3,Rheb,Rnaseh2b,Rnf8…
MP:0000313	abnormal cell death	0.000125	0.0155	598	4028	Common	Abcc9,Acp1,Adar,Adm,Ahctf1,Ahi1,Ahr,Aimp1,Akap6,Akt3,Aldh2,Antxr2,Apaf1,Apbb1,Apc,Apex2,App,Appl1,Ar,Arfgef1,Arhgap1,Arhgef15,Arih2,Astn1,Ate1,Atf6b,Atg3,Atg7,Atm,Atmin,Atp6ap2,Atp7a,Atr,B3gnt2,Bach1,Bad,Bag3,Bag6,Bax,Bbs1,Bbs10,Bcl10,Bcl2,Bcl2l1,Bcl2l2,Bcl3,Bcl6,Bdnf,Becn1,Bid,Birc3,Bmf,Bmp4,Bmpr1b,Bnip3l,Brca2,Btg1,Btrc,Bub1b,Cacna1a,Calcrl,Camk2g,Caml,Caprin1,Cask,Casp2,Casp3,Casp4,Casp8,Casp9…
MP:0005093	decreased B cell proliferation	0.000127	0.0155	63	4028	Common	Arhgef6,Bcl10,Bcl2,Bcl3,Bcl6,Btk,Casp8,Ccnd3,Cd59a,Cd74,Cd80,Cd81,Clec4d,Ctnnbl1,Dapp1,Ebf1,Ep300,Ercc1,Ezh2,Gimap5,Id3,Igbp1,Ikbkb,Ikzf1,Irf2,Ly86,Lyn,Map3k14,Mark2,Mcm3ap,Mtor,Myc,Nfatc1,Nfkb1,Nfkb2,Nfkbia,Nfkbid,Parp14,Peli1,Pik3ap1,Pik3r1,Plcg2,Pnp,Ppm1d,Ppp2r3c,Prkcb,Ptpn6,Ptprc,Rel,Rnaseh2b,Rras2,Sema4d,Sh3bp2,Slc3a2,Smad7,Smarcc1,Sppl2a,Stat6,Stim1,Tlr4,Ube2n,Unc93b1,Vav1
MP:0000221	decreased leukocyte cell number	0.000145	0.0172	547	4028	Common	4933434E20Rik,Abcb1a,Ackr3,Acp2,Acsl3,Actl6a,Adam10,Adam17,Adm,Adpgk,Agap1,Akap11,Akap9,Aldh2,Ankrd11,Ap1g1,Ap4e1,Apc,Apex2,Arhgap15,Arhgap17,Arhgap22,Arhgdib,Arhgef6,Arid1b,Arid4a,Arid5a,Arid5b,Arntl,Arsg,Asl,Aspm,Atg16l2,Atg3,Atg5,Atg7,Atm,Atmin,Atp13a2,Atp5f1,Atr,B2m,B3gnt5,B4gat1,Bad,Bag3,Bap1,Batf,Bcl10,Bcl2,Bcl2l1,Bcl3,Bcl6,Bcl6b,Becn1,Bhlhe40,Birc2,Birc3,Bmf,Bmi1,Brpf1,Bst1,Btk,C3,C9orf72,…
MP:0002421	abnormal cell-mediated immunity	0.000145	0.0172	626	4028	Common	Abcb1a,Abhd16a,Adam17,Adipoq,Ahr,Akr1a1,Alox5,Alox5ap,Anxa8,Apc,Apobec3,Appl1,Arhgap15,Arhgap25,Arhgdib,Arhgef6,Arih2,Arntl,Arrb2,Asb2,Atf3,Atg16l1,Atg3,Atg5,Atm,Atmin,Atp6v1h,Azi2,B2m,B3gnt2,B3gnt5,B4galt1,B4gat1,Bad,Bag4,Batf,Bax,Bbs4,Bbx,Bcat1,Bcl10,Bcl2,Bcl2l1,Bcl3,Bcl6,Bcl6b,Becn1,Bhlhe40,Birc2,Birc3,Bloc1s6,Bmf,Bmi1,Brca2,Bst1,Btk,Bub1b,C1qtnf3,C3,C9orf72,Cacnb3,Cadm1,Camk2g,Caml,Capn1,Casp…
MP:0002619	abnormal lymphocyte morphology	0.000182	0.0213	594	4028	Common	2310022B05Rik,4933434E20Rik,Abcb1a,Ackr3,Acp2,Acsl3,Actl6a,Adam10,Adam17,Adm,Adpgk,Akap9,Aldh2,Ank1,Ano10,Ap1g1,Ap4e1,Apc,Apex2,Apoo,Ar,Arhgap15,Arhgap17,Arhgap22,Arhgdib,Arhgef6,Arid1b,Arid4a,Arid5a,Arid5b,Arntl,Arsg,Asl,Aspm,Atg16l2,Atg3,Atg5,Atg7,Atm,Atmin,Atp13a2,Atp5f1,Atr,B2m,B3gnt5,B4galt1,Bad,Bag3,Bap1,Batf,Bax,Bcl10,Bcl2,Bcl2l1,Bcl3,Bcl6,Bcl6b,Becn1,Bhlhe40,Birc2,Birc3,Bmf,Bmi1,Brpf1,Bst…
MP:0013657	abnormal blood cell morphology	0.000191	0.022	791	4028	Common	4933434E20Rik,Abca6,Abcb10,Abcb1a,Abcb6,Abhd5,Acaa1a,Acp2,Acsl4,Acsl5,Actl6a,Acvrl1,Adam10,Adam17,Adamts7,Adar,Add1,Add2,Adgre5,Agap1,Agpat1,Agtr1a,Ahr,Aif1,Akna,Alas2,Aldh3a2,Ampd3,Angel1,Ank1,Ankrd27,Anxa7,Ap3b1,Ap4e1,Apbb2,Apc,Apex2,Appl1,Appl2,Aprt,Ar,Arhgap15,Arhgap17,Arhgap22,Arhgap25,Arhgef3,Arid4a,Arid5b,Arl6ip1,Arntl,Arpc1b,Arpc2,Arrb2,Arsg,Asl,Asns,Aspa,Aspm,Atg16l1,Atg7,Atm,Atmin,Atp6v…
MP:0012556	increased cell death	0.000198	0.0225	367	4028	Common	Adar,Adm,Aimp1,Akap6,Akt3,Aldh2,Antxr2,Apaf1,Apc,App,Arfgef1,Arhgap1,Arih2,Astn1,Atg3,Atg7,Atmin,Atp6ap2,Atp7a,Atr,B3gnt2,Bad,Bag3,Bag6,Bbs1,Bcl10,Bcl2,Bcl2l1,Bdnf,Becn1,Bmp4,Bmpr1b,Brca2,Btg1,Btrc,Bub1b,Cacna1a,Calcrl,Caml,Caprin1,Cask,Casp3,Casp8,Cast,Cbfb,Ccdc47,Ccdc86,Cd59a,Cdc20,Cdc25a,Cdk11b,Cdk5rap2,Cenpj,Cep152,Chd7,Clpp,Col5a3,Copb2,Cops5,Cops6,Coq7,Coq9,Coro1a,Crim1,Csnk1a1,Cul1,Cul3,Cu…
MP:0001265	decreased body size	0.000209	0.0231	990	4028	Common	Aaas,Aars,Abcb1a,Abcc4,Abcc9,Abhd16a,Abhd5,Acacb,Acot13,Acp1,Acp2,Acsl3,Acsl4,Acvrl1,Adam17,Adam22,Adamts1,Adamts18,Adar,Adarb1,Adcy3,Adcyap1r1,Add1,Adgrg6,Adh1,Adipoq,Adk,Aebp1,Agtpbp1,Agtr1a,Ahi1,Ahr,Akap11,Akap6,Akap9,Akna,Akr1b3,Aktip,Aldh1a2,Aldh2,Aldh5a1,Aldob,Ampd2,Ank,Ank1,Ank2,Ankrd11,Ap1g1,Ap1s2,Apba1,Apba2,Apc,Aplp1,App,Aprt,Aqp1,Ar,Araf,Arcn1,Arhgap1,Arhgap25,Arhgap35,Arhgef11,Arid1b,…
MP:0003222	increased cardiomyocyte apoptosis	0.000209	0.0231	37	4028	Common	Adm,Akap6,Bag3,Calcrl,Casp3,Casp8,Chd7,Dicer1,Dnaja3,Dusp6,Gnaq,Hdac2,Inpp5f,Ivns1abp,Jup,Kifap3,Mapk1,Mapk14,Mapk8,Med1,Mtor,Myh10,Nol3,Pak1,Phc1,Raf1,Rasa1,Sos1,Srf,Stat1,Stat3,Tcap,Tfam,Ube4b,Uvrag,Ywhaq,Zfpm2
MP:0013663	increased myeloid cell number	0.000212	0.0231	127	4028	Common	Abcb10,Actl6a,Adam10,Adam17,Add1,Add2,Agap1,Agtr1a,Ank1,Anxa7,Ap4e1,Arid4a,Arntl,Arsg,Atad5,Atp6v1d,Bak1,Bap1,Bcl6b,Bnip3l,Casp8,Cbfb,Cd47,Cd59a,Cdkn2b,Chordc1,Clic1,Copg1,Cpox,Ctnna2,Cyb561,Dcbld2,Dck,Dhx36,Dmtn,Eftud2,Ep300,Etv6,Exoc6,Fam107b,Fbxo7,Gimap6,Gmnn,Gpi1,Hk1,Hmga1,Hyal2,Ikzf1,Itgb2,Itgb3,Jak1,Jak2,Kitl,Knop1,Lama4,Ldha,Lgmn,Lpin2,Lyn,Man2a1,Mapk10,Mcat,Mcm3,Mcm4,Mgat2,Myo1e,Nckap1l,N…
MP:0001392	abnormal locomotor behavior	0.000222	0.0239	665	4028	Common	Aaas,Aars,Abca3,Abcd1,Abhd12,Acadvl,Acot13,Acot7,Acp2,Adam22,Adam23,Adarb1,Adcy3,Adcy5,Adcyap1r1,Adgrb2,Adgrg1,Adgrg6,Adgrl2,Adgrl3,Adipor2,Adk,Adm,Afap1l2,Agl,Agtpbp1,Ahi1,Akap11,Aktip,Aldh5a1,Als2,Ank,Ank2,Ank3,Ankib1,Ap1g1,Ap1s2,Ap2b1,Ap3b2,Ap4e1,Apaf1,Apba1,Apc,Apod,App,Appl1,Aqp1,Araf,Arcn1,Arhgap10,Arhgef11,Arid4a,Arl6ip1,Arl6ip5,Arntl,Arrdc3,Asl,Aspa,Ass1,Asxl2,Ate1,Atf2,Atg12,Atg4b,Atg4c,…
MP:0002458	abnormal B cell number	0.00023	0.024	265	4028	Common	2310022B05Rik,Ackr3,Acp2,Acsl3,Actl6a,Adam10,Adam17,Adpgk,Akap9,Ano10,Apex2,Ar,Arhgap17,Arhgap22,Arhgdib,Arhgef6,Arid4a,Arntl,Arsg,Atg7,Atm,Atmin,B3gnt5,Bad,Batf,Bax,Bcl10,Bcl2,Bcl3,Bcl6,Birc3,Bmf,Bmi1,Bst1,Btk,Car9,Casp8,Ccdc127,Ccnd3,Cd24a,Cd274,Cd36,Cd40,Cd59a,Cd72,Cd74,Cd80,Cd81,Cd84,Cd86,Cdkn1a,Cdkn2b,Cds2,Clec4d,Clpp,Col10a1,Coro1a,Csf1,Cxcr4,Cyld,Dapp1,Dck,Ddhd1,Def6,Diaph1,Dicer1,Dll4,Dna…
MP:0002066	abnormal motor capabilities/coordination/movement	0.000231	0.024	989	4028	Common	2310022B05Rik,Aaas,Aars,Abca3,Abca5,Abcb1a,Abcd1,Abcd4,Abcg2,Abhd12,Acadvl,Ackr3,Acot13,Acot7,Acp2,Adam22,Adam23,Adamts4,Adamts7,Adarb1,Adcy3,Adcy5,Adcyap1r1,Adgrb2,Adgrg1,Adgrg6,Adgrl2,Adgrl3,Adipor2,Adk,Adm,Afap1l2,Aff3,Agap1,Agl,Ago3,Agtpbp1,Ahi1,Ahr,Akap11,Akap12,Akap5,Akna,Aktip,Aldh2,Aldh5a1,Als2,Ank,Ank1,Ank2,Ank3,Ankib1,Ankrd1,Ankrd11,Ankrd27,Ap1g1,Ap1s2,Ap2b1,Ap3b1,Ap3b2,Ap4e1,Apaf1,Apba…
MP:0008171	abnormal mature B cell morphology	0.000231	0.024	266	4028	Common	2310022B05Rik,Ackr3,Acp2,Acsl3,Actl6a,Adam10,Adam17,Adpgk,Akap9,Ano10,Apex2,Ar,Arhgap17,Arhgap22,Arhgdib,Arhgef6,Arid4a,Arntl,Arsg,Atg7,Atm,Atmin,B3gnt5,Bad,Batf,Bax,Bcl10,Bcl2,Bcl3,Bcl6,Birc3,Bmf,Bmi1,Bst1,Btk,Car9,Casp8,Ccdc127,Ccnd3,Cd24a,Cd274,Cd36,Cd40,Cd59a,Cd72,Cd74,Cd80,Cd81,Cd84,Cd86,Cdkn1a,Cdkn2b,Cds2,Clec4d,Clpp,Col10a1,Coro1a,Csf1,Cxcr4,Cyld,Dapp1,Dck,Ddhd1,Def6,Diaph1,Dicer1,Dll4,Dna…
MP:0005017	decreased B cell number	0.000238	0.0243	204	4028	Common	Ackr3,Acsl3,Actl6a,Adam10,Adam17,Akap9,Apex2,Arhgap17,Arhgdib,Arhgef6,Arid4a,Arntl,Arsg,Atg7,Atm,Atmin,B3gnt5,Bad,Batf,Bcl10,Bcl2,Bcl3,Bcl6,Birc3,Bmi1,Bst1,Btk,Casp8,Ccnd3,Cd24a,Cd274,Cd40,Cd59a,Cd72,Cd74,Cd80,Cd81,Cd84,Cd86,Cds2,Col10a1,Coro1a,Csf1,Cxcr4,Cyld,Dapp1,Dck,Ddhd1,Diaph1,Dicer1,Dnajc11,Dock10,Dock2,Dock8,Dph6,Dynll1,Ebf1,Ell2,Elmo1,Ep300,Eps15,Erg,Esr1,Etv6,Ezh1,Ezh2,F3,Fam92a,Fas,Flc…
MP:0002919	enhanced paired-pulse facilitation	0.00024	0.0243	24	4028	Common	Add2,Bace1,C3,Cacna1a,Chrd,Cspg5,Cyfip1,Dlg4,Ehmt1,Foxp2,Gdi1,Gys1,Ptn,Ptprd,Rab3gap1,Rimbp2,Sirpa,Snap25,Snap91,Stxbp5,Syn1,Syt2,Tnik,Vamp2
MP:0002183	gliosis	0.00026	0.026	101	4028	Common	Abcd1,Abhd12,Acot7,Acp2,Adamts4,Adk,Aldh2,Aldh5a1,Als2,App,Arsg,Aspa,Atg7,Atmin,Atp13a2,Atrn,Bad,Bid,Bmi1,Canx,Cav1,Ccm2,Cers6,Clcn3,Cln3,Cln6,Cln8,Cnp,Cntn1,Coq9,Cox10,Cx3cr1,Dag1,Depdc5,Dnajc5,Ei24,Ercc8,Fig4,Galc,Gba,Gnptab,Gns,Gria2,Grn,Hax1,Hgsnat,Hsd17b4,Htt,Inpp4a,Kcnq3,Lbr,Lgi1,Ltn1,Mapk1,Mgrn1,Mpp5,Myo7a,Nf1,Nfe2l2,Notch3,Npc1,Opa1,Pdcd10,Pdcd6ip,Pdgfb,Pex13,Pi4k2a,Plaa,Plp1,Pomt2,Ppard,…
MP:0005281	increased fatty acid level	0.000264	0.026	71	4028	Common	Abcd1,Abhd5,Acadl,Acot7,Acsbg1,Adipoq,Aldh2,Amacr,Ank2,Ankrd26,Apc,Arntl,Blvra,Bscl2,C3,Cavin1,Ccar2,Ccdc80,Ccl2,Cd36,Cpt1a,Dap,Decr1,Eci1,Ecscr,Ehmt1,Fabp3,Fabp4,Fads3,Fasn,G0s2,Gfm1,Ghr,Hadh,Hadha,Hmgcr,Hsd17b4,Irs1,Itga8,Kdm3a,Ldlr,Lipe,Lonrf3,Lpin1,Ndufs6,Nfkb1,Nos3,Npy1r,Nus1,Pck1,Pdk4,Pex1,Pex7,Plscr3,Polr2h,Ppara,Ppard,Pparg,Ppil3,Prkaa2,Prkci,Pten,Rpn2,Scp2,Sirt1,Slc43a2,Stat5b,Tbc1d4,Tgf…
MP:0003312	abnormal locomotor coordination	0.000266	0.026	294	4028	Common	Aars,Abhd12,Acp2,Adam22,Adam23,Adgrg6,Agl,Agtpbp1,Aldh5a1,Ank,Ank3,Ap1g1,Apba1,App,Araf,Arcn1,Arhgap10,Arl6ip1,Arntl,Aspa,Ass1,Atf2,Atg4b,Atg5,Atg7,Atl1,Atm,Atp13a2,Atp7a,Atrn,Bace1,Bckdk,Bdnf,Bicd2,Bloc1s5,Bloc1s6,Bmi1,Bmp4,Bsn,Btd,Cacna1a,Cacna1b,Camk4,Camta1,Canx,Car8,Casp3,Cast,Cav1,Ccm2,Cerk,Cfl1,Chd7,Chn1,Chp1,Ciz1,Clcn3,Clic5,Cln3,Cln8,Cnp,Cntn1,Cntnap1,Coq9,Cp,Cplx2,Ctnna2,Ctsa,Cyb561,Dap…
MP:0000745	tremors	0.000274	0.0265	146	4028	Common	Aars,Abca5,Abcb1a,Acp2,Adam23,Agtpbp1,Ank1,Ank3,Araf,Aspa,Ass1,Atf2,Atg5,Atg7,Atp7a,Atrn,Bag3,Bmi1,Btd,Cacna1a,Cacna1g,Camk4,Canx,Car8,Cars2,Chp1,Cisd2,Clcn3,Cln3,Cntnap1,Col13a1,Ctsa,Cyb561,Cys1,Dbnl,Ddc,Decr1,Degs1,Dnajc11,Ect2,Ei24,Fdft1,Fgfr2,Fig4,Galc,Gli2,Glrb,Gnao1,Golga1,Herc2,Herc3,Hip1,Hprt,Hsd17b4,Htt,Iqce,Ireb2,Itch,Itga2,Kcna1,Kcna2,Kcnab2,Kif5a,Klhdc2,Lama4,Lamc1,Lif,Lmnb1,Lpin1,Lpi…
MP:0005058	abnormal lysosome morphology	0.000293	0.0278	27	4028	Common	Acp2,Ap3b1,Atg5,Atm,Atp13a2,Bloc1s2,Cln3,Coq7,Ctsa,Ctsl,Gnptab,Gusb,Hgsnat,Kif5b,Lamtor1,Lgmn,Lyst,Man2b1,Neu1,Npc2,Pink1,Plekhm1,Spg11,Tpp1,Uvrag,Vps35,Zfyve26
MP:0004768	abnormal axonal transport	0.000296	0.0278	20	4028	Common	Als2,App,Dock3,Dpysl3,Dync1h1,Gan,Gdap1,Kif1b,Kif5a,Klc1,Lama2,Mapt,Mbp,Mfn2,Nefm,Plp1,Rhot1,Snapin,Spast,Spg7
MP:0008540	abnormal cerebral hemisphere morphology	0.000299	0.0278	281	4028	Common	4933434E20Rik,Abcb1a,Adgrg1,Agtpbp1,Akt3,Aldh2,Ank2,Ank3,Ap3b1,Ap3m2,Ap4e1,Apaf1,App,Arfgef1,Arfgef2,Arhgap35,Arid1b,Arl6,Arsg,Asns,Aspm,Atg5,Atg7,Atp7a,Atr,Atrn,Bad,Basp1,Bbs1,Bbs2,Bbs4,Bdnf,Bicd2,Bid,Bloc1s2,Bmi1,Brpf1,Btg1,C3,Cadm1,Cadps,Canx,Casp9,Cav1,Ccdc88a,Cd81,Cdh2,Cdk5,Cdk5rap2,Cdkn1b,Cdon,Cenpj,Cep290,Cers2,Cers6,Cfl1,Chd7,Chl1,Chmp2b,Chn1,Chn2,Ckap5,Ckb,Clcn3,Clip2,Cln3,Copb2,Cox10,Cp…
MP:0004939	abnormal B cell morphology	0.000317	0.0292	296	4028	Common	2310022B05Rik,Ackr3,Acp2,Acsl3,Actl6a,Adam10,Adam17,Adpgk,Akap9,Ano10,Apex2,Ar,Arhgap17,Arhgap22,Arhgdib,Arhgef6,Arid4a,Arid5b,Arntl,Arsg,Atg7,Atm,Atmin,B3gnt5,Bad,Batf,Bax,Bcl10,Bcl2,Bcl3,Bcl6,Birc3,Bmf,Bmi1,Bst1,Btk,Car9,Casp8,Ccdc127,Ccnd3,Ccr9,Cd24a,Cd274,Cd36,Cd40,Cd59a,Cd72,Cd74,Cd80,Cd81,Cd83,Cd84,Cd86,Cdkn1a,Cdkn2b,Cds2,Clec4d,Clpp,Col10a1,Coro1a,Csf1,Ctnnbl1,Cxcr4,Cyld,Dapp1,Dbr1,Dck,Ddh…
MP:0008781	abnormal B cell apoptosis	0.000326	0.0298	36	4028	Common	Atmin,Bcl2,Bcl3,Birc3,Bmf,Casp2,Cxcr4,Ebf1,Ep300,Faim,Fas,Fcgr2b,Fnip1,Grb2,Ikbkb,Ikzf1,Mcl1,Myc,Nfatc1,Nfkbia,Nfkbid,Parp14,Peli1,Plcg2,Prkcd,Pten,Ptpn22,Sh3bp2,Smad7,Smarcc1,Sppl2a,Stat6,Tlr2,Tnfaip3,Traf3,Ube2n
MP:0000716	abnormal immune system cell morphology	0.000369	0.0333	839	4028	Common	2310022B05Rik,4933434E20Rik,Abcb1a,Abcd1,Abhd12,Abhd5,Ackr3,Acp2,Acsl3,Actl6a,Adam10,Adam17,Adam8,Adgre5,Adipoq,Adm,Adpgk,Agap1,Ahr,Aimp1,Akap11,Akap9,Akna,Akr1a1,Aldh2,Ampd3,Ank,Ank1,Ankrd11,Ankrd27,Ano10,Ap1g1,Ap4e1,Apc,Apex2,Apoo,App,Ar,Arhgap15,Arhgap17,Arhgap22,Arhgap25,Arhgdib,Arhgef6,Arid1b,Arid4a,Arid5a,Arid5b,Arntl,Arsg,Asl,Aspm,Atg16l1,Atg16l2,Atg3,Atg5,Atg7,Atm,Atmin,Atp13a2,Atp5f1,Atp…
MP:0004166	abnormal limbic system morphology	0.000414	0.0366	182	4028	Common	Abcb1a,Agtpbp1,Agtr1a,Akt3,Aldh2,Ank3,Ap3m2,Apaf1,App,Arfgef1,Arid1b,Arl6,Arnt2,Arsg,Atg5,Atg7,Atp7a,Bad,Basp1,Bbs1,Bbs2,Bbs4,Bdnf,Bicd2,Bid,Bmi1,Brpf1,Btg1,C3,Cadm1,Cadps,Cav1,Ccdc88a,Cd81,Cdk5,Cdk5rap2,Cdkn1b,Cenpj,Cers2,Cers6,Chd7,Chl1,Chmp2b,Chn2,Ckap5,Ckb,Clcn3,Cln3,Cox10,Cplx2,Csf1,Ctnna2,Cxcr4,Dag1,Dbn1,Dgkb,Dlg4,Dmxl2,Dpysl3,Ebf2,Ehmt1,Ei24,Eno2,Esr1,Faah,Fabp7,Fkrp,Fmr1,Folh1,Gak,Gba,Gcl…
MP:0006042	increased apoptosis	0.000415	0.0366	361	4028	Common	Adar,Adm,Aimp1,Akap6,Akt3,Aldh2,Antxr2,Apaf1,Apc,App,Arfgef1,Arhgap1,Arih2,Astn1,Atg3,Atg7,Atmin,Atp6ap2,Atp7a,Atr,B3gnt2,Bad,Bag3,Bag6,Bbs1,Bcl10,Bcl2,Bcl2l1,Bdnf,Becn1,Bmp4,Bmpr1b,Brca2,Btg1,Btrc,Bub1b,Cacna1a,Calcrl,Caml,Caprin1,Cask,Casp3,Casp8,Cast,Cbfb,Ccdc47,Ccdc86,Cd59a,Cdc20,Cdc25a,Cdk11b,Cdk5rap2,Cenpj,Cep152,Chd7,Clpp,Col5a3,Copb2,Cops5,Cops6,Coq9,Coro1a,Crim1,Csnk1a1,Cul1,Cul3,Cul4a,C…
MP:0000717	abnormal lymphocyte cell number	0.000433	0.0378	547	4028	Common	2310022B05Rik,4933434E20Rik,Abcb1a,Ackr3,Acp2,Acsl3,Actl6a,Adam10,Adam17,Adm,Adpgk,Akap9,Aldh2,Ank1,Ano10,Ap1g1,Ap4e1,Apc,Apex2,Apoo,Ar,Arhgap15,Arhgap17,Arhgap22,Arhgdib,Arhgef6,Arid1b,Arid4a,Arid5a,Arid5b,Arntl,Arsg,Asl,Aspm,Atg16l2,Atg3,Atg5,Atg7,Atm,Atmin,Atp13a2,Atp5f1,Atr,B2m,B3gnt5,B4galt1,Bad,Bag3,Bap1,Batf,Bax,Bcl10,Bcl2,Bcl2l1,Bcl3,Bcl6,Bcl6b,Becn1,Bhlhe40,Birc2,Birc3,Bmf,Bmi1,Brpf1,Bst…
MP:0008284	abnormal hippocampus pyramidal cell layer	0.000437	0.0378	41	4028	Common	Aldh2,Atg7,Bicd2,Brpf1,Cadps,Cd81,Ckap5,Clcn3,Cln3,Csf1,Ctnna2,Dlg4,Dpysl3,Ehmt1,Ei24,Fmr1,Hdac2,Ireb2,Islr2,Klf7,Lrp8,Lyst,Mapt,Ndel1,Nr4a3,Pten,Rac1,Reln,Scyl2,Spg11,Ssb,Stam,Syn1,Tnr,Top2b,Tsc2,Tuba1a,Usp14,Ywhae,Ywhaz,Zbtb18
MP:0011181	increased hematopoietic cell number	0.000444	0.0379	539	4028	Common	2310022B05Rik,4933434E20Rik,Abcb10,Abcb1a,Acp2,Acsl3,Actl6a,Adam10,Adam17,Adam8,Add1,Add2,Adgre5,Adipoq,Adm,Adpgk,Agap1,Agtr1a,Aimp1,Akap9,Akna,Akr1a1,Ampd3,Ank1,Ankrd27,Ano10,Anxa7,Ap4e1,Apc,Ar,Arhgap17,Arhgap22,Arhgap25,Arid1a,Arid4a,Arid5a,Arid5b,Arntl,Arsg,Asl,Atad5,Atg16l1,Atm,Atp6v1d,B2m,B4galt1,Bak1,Bap1,Bax,Bcl10,Bcl2,Bcl2l1,Bcl3,Bcl6,Bcl6b,Bcor,Bex2,Bhlhe40,Birc3,Bloc1s2,Bmf,Bnip3l,Brpf1…
MP:0000952	abnormal CNS glial cell morphology	0.000448	0.0379	146	4028	Common	Abcd1,Abhd12,Acp2,Adgrg1,Aldh2,Als2,App,Arsg,Aspa,Aspm,Atg7,Atmin,Atp13a2,Atr,Atrn,B4gat1,Bloc1s2,Bmp4,Brpf1,Cadm1,Canx,Cav1,Ccm2,Cd81,Cdh2,Cdkn1b,Cers6,Clcn3,Cln6,Coq9,Cox10,Cp,Csf1,Cx3cr1,Dag1,Depdc5,Dner,Ei24,Eif2b4,Eif2b5,Ercc8,Ezh2,Fgfr2,Fig4,Fkrp,Folh1,Foxp2,Galc,Gba,Gja1,Gls,Gnptab,Gns,Gria2,Grn,Hax1,Hgsnat,Hsd17b4,Htt,Il1b,Il34,Insc,Ireb2,Itgb8,Kcna1,Kcnk13,Kcnq3,Lamb2,Lamc1,Ldlr,Lif,Lig3…
MP:0011182	decreased hematopoietic cell number	0.000467	0.039	644	4028	Common	4933434E20Rik,Abcb10,Abcb1a,Ackr3,Acp2,Acsl3,Acsl4,Acsl5,Actl6a,Adam10,Adam17,Adm,Adpgk,Agap1,Aif1,Akap11,Akap9,Alas2,Aldh2,Aldh3a2,Ank1,Ankrd11,Ap1g1,Ap4e1,Apc,Apex2,Arhgap15,Arhgap17,Arhgap22,Arhgdib,Arhgef6,Arid1b,Arid4a,Arid5a,Arid5b,Arntl,Arrb2,Arsg,Asl,Aspm,Atg16l2,Atg3,Atg5,Atg7,Atm,Atmin,Atp13a2,Atp5f1,Atp8a1,Atr,B2m,B3gnt5,B4galt1,B4gat1,Bad,Bag3,Bap1,Batf,Bcl10,Bcl2,Bcl2l1,Bcl3,Bcl6,Bcl…
MP:0008246	abnormal leukocyte morphology	0.00047	0.039	830	4028	Common	2310022B05Rik,4933434E20Rik,Abcb1a,Abcd1,Abhd12,Abhd5,Ackr3,Acp2,Acsl3,Actl6a,Adam10,Adam17,Adam8,Adgre5,Adipoq,Adm,Adpgk,Agap1,Ahr,Aimp1,Akap11,Akap9,Akna,Akr1a1,Aldh2,Ampd3,Ank,Ank1,Ankrd11,Ankrd27,Ano10,Ap1g1,Ap4e1,Apc,Apex2,Apoo,App,Ar,Arhgap15,Arhgap17,Arhgap22,Arhgap25,Arhgdib,Arhgef6,Arid1b,Arid4a,Arid5a,Arid5b,Arntl,Arsg,Asl,Aspm,Atg16l1,Atg16l2,Atg3,Atg5,Atg7,Atm,Atmin,Atp13a2,Atp5f1,Atp…
MP:0005584	abnormal enzyme/coenzyme activity	0.000511	0.0416	120	4028	Common	Abcb7,Abhd12,Abhd16a,Abhd5,Acadl,Acadvl,Acot13,Acvrl1,Adcy5,Agtr1a,Ahr,Akr1a1,Alb,Aldh2,Aldh3a2,Angptl4,Ap3b1,Asl,Ass1,Atox1,Atp6v1h,Atp7a,B4galt1,Bcl3,Cacna1a,Ccs,Cdc25a,Cox10,Cpeb2,Crim1,Ctsc,Cyld,Ddah1,Ddc,Dhrs3,Dsel,Ednrb,Exoc6,Fas,G0s2,Galc,Gapdh,Gba,Gba2,Gde1,Glrx2,Glud1,Gnaq,Gnptab,Gnptg,Gpc3,Gpd1,Gpi1,Gpt2,Hck,Hgsnat,Hprt,Hsd11b1,Ifnar1,Ikbkb,Jak1,Jak2,Klf15,Ldha,Lipe,Lox,Lpin1,Lpin2,M6pr…
MP:0000217	abnormal leukocyte cell number	0.000511	0.0416	737	4028	Common	2310022B05Rik,4933434E20Rik,Abcb1a,Ackr3,Acp2,Acsl3,Actl6a,Adam10,Adam17,Adam8,Adgre5,Adipoq,Adm,Adpgk,Agap1,Aimp1,Akap11,Akap9,Akna,Akr1a1,Aldh2,Ampd3,Ank1,Ankrd11,Ankrd27,Ano10,Ap1g1,Ap4e1,Apc,Apex2,Apoo,Ar,Arhgap15,Arhgap17,Arhgap22,Arhgap25,Arhgdib,Arhgef6,Arid1b,Arid4a,Arid5a,Arid5b,Arntl,Arsg,Asl,Aspm,Atg16l1,Atg16l2,Atg3,Atg5,Atg7,Atm,Atmin,Atp13a2,Atp5f1,Atr,B2m,B3gnt5,B4galt1,B4gat1,Bad,…
MP:0004769	abnormal synaptic vesicle morphology	0.000519	0.0418	29	4028	Common	Ap1s2,Ap3m2,Bsn,C3,Cadps,Clcn3,Col13a1,Dnajc6,Erc2,Fgf7,Fgfr2,Gdi1,Kif1b,Madd,Map6,Nbea,Pacsin1,Pak3,Pcdh17,Pclo,Pfn2,Pten,Sirpa,Slc18a2,Slc7a5,Snap91,Syde1,Syn2,Tnr
MP:0003091	abnormal cell migration	0.000534	0.0426	228	4028	Common	2700049A03Rik,Adam17,Adam9,Adamts7,Adgrg1,Aggf1,Ajuba,Aldh1a2,Alox5,Anxa8,Apaf1,Appl1,Appl2,Arfgef2,Arhgap25,Arhgef28,Arid1a,Arid5b,Arntl,Ass1,Astn1,B4galt1,B4gat1,Bicd2,Brpf1,Capn1,Capns1,Ccdc141,Ccdc88a,Ccl2,Ccr1,Ccr5,Cd163,Cd36,Cd44,Cd47,Cd82,Cd99l2,Cdh2,Cdkn1a,Cdkn1b,Cdyl,Cfl1,Chd7,Chrd,Chst2,Chuk,Clasp2,Clic4,Coro1a,Coro7,Csf1,Ctsc,Cttn,Cx3cr1,Cxcr4,Cyld,Cytip,Dag1,Dcbld2,Diaph1,Dock2,Dock8,…
MP:0004188	delayed embryo turning	0.000545	0.0431	15	4028	Common	Chd7,Cluap1,Dph3,Ift122,Ift57,Ilk,Lmo2,Mbd4,Mpi,Numb,Rapgef2,Rev3l,Tcof1,Wasl,Wdr35
MP:0003221	abnormal cardiomyocyte apoptosis	0.000585	0.0459	43	4028	Common	Acp1,Adm,Akap6,Bach1,Bag3,Bnip3l,Calcrl,Casp3,Casp8,Chd7,Dicer1,Dnaja3,Dusp6,Gnaq,Hdac2,Inpp5f,Ivns1abp,Jup,Kifap3,Map2k1,Mapk1,Mapk14,Mapk8,Mapk9,Mapkapk2,Med1,Mtor,Myh10,Nol3,Pak1,Phc1,Raf1,Rasa1,Sos1,Srf,Stat1,Stat3,Tcap,Tfam,Ube4b,Uvrag,Ywhaq,Zfpm2
MP:0004272	abnormal basement membrane morphology	0.000645	0.05	27	4028	Common	Adm,Ahi1,B4gat1,Cav2,Col13a1,Col4a3,Crim1,Dag1,Fras1,Ilk,Itga6,Itgb8,Kdr,Lama2,Lama4,Lamc1,Mmp14,Myo7a,Nid1,P4ha1,Pdgfrb,Pomgnt2,Pomt2,Reck,Ric8a,Slc31a1,Spint1
MP:0006206	embryonic lethality between somite formation and embryo turning	0.000653	0.0502	57	4028	Common	Abcb7,Acly,Ash2l,Brca2,Cct3,Cenpj,Cenpu,Chrd,Cops3,Cops6,Cript,Ctdnep1,Cyfip1,Dync1h1,Eef1e1,Eif2s2,Ercc3,Ezh2,Fbxl5,Glul,Gne,Hk2,Hsd17b12,Htt,Ilk,Ippk,Lias,Lig3,Lrpprc,Map1b,Med1,Metap2,Mtap,Nckap1,Nr4a3,Nup133,Pdcd10,Pik3cb,Pikfyve,Poglut1,Prickle1,Ptk2,Rac1,Rbpj,Rgs4,S100a8,Smad4,Stim1,Suz12,Tnnt2,Tpt1,Trim33,Txnrd1,Vegfa,Vps41,Xrcc1,Zfr
MP:0002429	abnormal blood cell morphology/development	0.000686	0.0523	472	4028	Common	Abcb10,Abcb6,Actl6a,Acvrl1,Adam10,Adam17,Adar,Add1,Add2,Ahr,Alas2,Ank1,Ap4e1,Apc,Ar,Arf6,Arhgap1,Arhgap17,Arid4a,Arid5b,Arntl,Atg7,Atm,Atmin,B4galt1,Bad,Bap1,Batf,Bax,Bcl10,Bcl2,Bcl2l1,Bcl3,Bcl6,Bcl6b,Bhlhe40,Bin3,Birc3,Bloc1s2,Bmf,Bmi1,Bnip3l,Brca2,Bst1,Btk,Bub1b,C3,Cadm1,Carm1,Casp8,Cbfb,Cbx4,Cby1,Ccdc134,Ccnd3,Ccr1,Ccr9,Cd1d1,Cd24a,Cd274,Cd34,Cd36,Cd44,Cd47,Cd59a,Cd72,Cd74,Cd80,Cd81,Cd83,Cd86,…
MP:0000685	abnormal immune system morphology	0.000702	0.053	1027	4028	Common	2310022B05Rik,4933434E20Rik,Abcb1a,Abcc4,Abcd1,Abhd12,Abhd5,Ackr3,Acp2,Acsl3,Actl6a,Adam10,Adam17,Adam8,Adamts6,Adamts9,Add2,Adgre5,Adipoq,Adm,Adpgk,Agap1,Ahr,Aif1,Aimp1,Akap11,Akap12,Akap9,Akna,Akr1a1,Aldh1a2,Aldh2,Alox5,Ampd3,Angptl4,Ank,Ank1,Ankrd11,Ankrd27,Ano10,Antxr2,Ap1b1,Ap1g1,Ap2b1,Ap4e1,Apc,Apex2,Apoo,App,Ar,Araf,Arhgap1,Arhgap15,Arhgap17,Arhgap22,Arhgap25,Arhgdib,Arhgef6,Arid1b,Arid4a,…
MP:0003491	abnormal voluntary movement	0.000733	0.0548	704	4028	Common	Aaas,Aars,Abca3,Abcd1,Abhd12,Acadvl,Acot13,Acot7,Acp2,Adam22,Adam23,Adarb1,Adcy3,Adcy5,Adcyap1r1,Adgrb2,Adgrg1,Adgrg6,Adgrl2,Adgrl3,Adipor2,Adk,Adm,Afap1l2,Agl,Agtpbp1,Ahi1,Akap11,Aktip,Aldh5a1,Als2,Ank,Ank2,Ank3,Ankib1,Ap1g1,Ap1s2,Ap2b1,Ap3b1,Ap3b2,Ap4e1,Apaf1,Apba1,Apc,Apod,App,Appl1,Aqp1,Araf,Arcn1,Arhgap10,Arhgef11,Arid4a,Arl6ip1,Arl6ip5,Arntl,Arrdc3,Asl,Aspa,Ass1,Asxl2,Ate1,Atf2,Atg12,Atg4b,…
MP:0001790	abnormal immune system physiology	0.00076	0.0563	985	4028	Common	4933434E20Rik,AU040320,Abcb1a,Abcc4,Abcg2,Abhd16a,Abhd5,Ackr1,Ackr3,Acp1,Acsl3,Adam17,Adam8,Adamts18,Adar,Adcyap1r1,Adgre5,Adipoq,Adm,Adprh,Agbl5,Ahi1,Ahr,Aif1,Aimp1,Akap12,Akna,Akr1a1,Aldob,Alox5,Alox5ap,Als2,Amfr,Ampd3,Ank,Ank1,Antxr2,Anxa7,Anxa8,Ap3b1,Apc,Apex2,Apobec3,App,Appl1,Aprt,Ar,Arhgap15,Arhgap25,Arhgdib,Arhgef6,Arid5a,Arid5b,Arih2,Arl3,Arntl,Arrb2,Asb2,Atf2,Atf3,Atg16l1,Atg3,Atg5,Atg9…
MP:0002089	abnormal postnatal growth/weight/body size	0.000768	0.0564	1259	4028	Common	4930453N24Rik,Aaas,Aars,Abcb1a,Abcc4,Abcc9,Abhd16a,Abhd5,Acacb,Acadvl,Acot13,Acot7,Acp1,Acp2,Acsl3,Acsl4,Acss1,Acvr1b,Acvrl1,Adam17,Adam22,Adamts1,Adamts18,Adar,Adarb1,Adcy3,Adcyap1r1,Add1,Adgrg6,Adh1,Adipoq,Adipor2,Adk,Adpgk,Aebp1,Afap1l2,Agtpbp1,Agtr1a,Ahi1,Ahr,Akap11,Akap6,Akap9,Akna,Akr1b3,Aktip,Aldh1a2,Aldh2,Aldh5a1,Aldob,Als2,Amacr,Amfr,Ampd2,Ank,Ank1,Ank2,Ankrd1,Ankrd11,Ankrd26,Anxa7,Ap1g1…
MP:0008558	abnormal interferon-beta secretion	0.00082	0.0597	20	4028	Common	Atg9a,Cd200r1,Dhx58,Hcfc2,Ifnar1,Ifnar2,Irf1,Irf7,Map3k8,Mex3c,Msr1,Nlrc5,Nlrx1,Peli1,Pycard,Rsad2,Tbk1,Tlr3,Tlr4,Tradd
MP:0004938	dilated vasculature	0.000829	0.0599	28	4028	Common	Acvrl1,Antxr2,Ccm2,Commd9,Crim1,Cyp2e1,Fbln1,G6pdx,Gja1,Lama4,Mlst8,Ncoa6,Parva,Pdcd10,Pdgfb,Pdlim7,Pnpla6,Prkci,Prrc2b,Ptk2,Reck,Runx1,Supv3l1,Syk,Tcf7l1,Tsc2,Vcl,Vegfa
MP:0008247	abnormal mononuclear cell morphology	0.000837	0.0599	717	4028	Common	2310022B05Rik,4933434E20Rik,Abcb1a,Abcd1,Abhd12,Ackr3,Acp2,Acsl3,Actl6a,Adam10,Adam17,Adam8,Adipoq,Adm,Adpgk,Agap1,Ahr,Aimp1,Akap9,Akr1a1,Aldh2,Ank,Ank1,Ankrd11,Ano10,Ap1g1,Ap4e1,Apc,Apex2,Apoo,App,Ar,Arhgap15,Arhgap17,Arhgap22,Arhgdib,Arhgef6,Arid1b,Arid4a,Arid5a,Arid5b,Arntl,Arsg,Asl,Aspm,Atg16l1,Atg16l2,Atg3,Atg5,Atg7,Atm,Atmin,Atp13a2,Atp5f1,Atp6v1h,Atr,B2m,B3gnt5,B4galt1,Bad,Bag3,Bap1,Batf,B…
MP:0013693	abnormal hemopoiesis	0.000892	0.0633	412	4028	Common	Abcb10,Abcb6,Actl6a,Acvrl1,Adam10,Adam17,Adar,Ahr,Alas2,Ank1,Apc,Ar,Arhgap17,Arid4a,Arid5b,Arntl,Atg7,Atm,Atmin,B4galt1,Bad,Bap1,Batf,Bax,Bcl10,Bcl2,Bcl2l1,Bcl3,Bcl6,Bhlhe40,Bin3,Birc3,Bmf,Bmi1,Bnip3l,Brca2,Bst1,Btk,Bub1b,Cadm1,Carm1,Casp8,Cbfb,Cbx4,Ccnd3,Ccr9,Cd1d1,Cd24a,Cd274,Cd34,Cd36,Cd44,Cd47,Cd59a,Cd72,Cd74,Cd80,Cd81,Cd83,Cd86,Cd9,Cdc25a,Cdk5rap2,Cdkn1b,Cdkn2b,Chordc1,Ciita,Clec4d,Col10a1,C…
MP:0001648	abnormal apoptosis	0.000916	0.0644	528	4028	Common	Acp1,Adar,Adm,Ahctf1,Ahi1,Ahr,Aimp1,Akap6,Akt3,Aldh2,Antxr2,Apaf1,Apc,App,Ar,Arfgef1,Arhgap1,Arhgef15,Arih2,Astn1,Ate1,Atg3,Atg7,Atmin,Atp6ap2,Atp7a,Atr,B3gnt2,Bach1,Bad,Bag3,Bag6,Bax,Bbs1,Bbs10,Bcl10,Bcl2,Bcl2l1,Bcl2l2,Bcl3,Bcl6,Bdnf,Becn1,Bid,Birc3,Bmf,Bmp4,Bmpr1b,Bnip3l,Brca2,Btg1,Btrc,Bub1b,Cacna1a,Calcrl,Camk2g,Caml,Caprin1,Cask,Casp2,Casp3,Casp4,Casp8,Casp9,Cast,Cbfb,Ccdc47,Ccdc80,Ccdc86,Cc…
MP:0003203	increased neuron apoptosis	0.000927	0.0646	87	4028	Common	Akt3,Apaf1,App,Arfgef1,Arhgap1,Astn1,Atg7,Atp7a,Atr,B3gnt2,Bbs1,Bcl2l1,Bdnf,Btg1,Caprin1,Cask,Cast,Cdk5rap2,Copb2,Coq9,Cx3cr1,Dnm1l,Ei24,Elavl4,Eno2,Erbb3,Gclm,Gria2,Grn,Hax1,Hnrnpab,Ikbkap,Il34,Kdm2a,Kidins220,Lancl1,Lbr,Lig4,Mbp,Mcph1,Mfn2,Mocs2,Mpp5,Ndfip1,Nos3,Nova1,Nr4a3,Oxr1,Park7,Parl,Pdgfrb,Pdss2,Pik3c3,Pink1,Polb,Ppt2,Prmt5,Psen1,Psmc1,Ptgs2,Rb1,Rbfox2,Rbl2,Rbm8a,Rel,Ret,Ric8b,S1pr1,Scyl…
MP:0009660	abnormal induced retinal neovascularization	0.000933	0.0646	18	4028	Common	Adam15,Adam9,Angptl4,Bcl2,Bmper,Cd82,Dll4,F3,Itgb3,Kdr,Lif,Mmp2,Nos2,Nos3,Nrp1,Plxnd1,Ptgs2,Rhoj
MP:0004045	abnormal cell cycle checkpoint function	0.00097	0.0666	39	4028	Common	Atm,Brpf1,Bub1b,Bub3,Cacybp,Casz1,Cdc25a,Cdkn1a,Chek2,Cops5,Cul4a,Hmgn1,Hus1,Ift122,Kmt5a,Lin9,Mad2l1,Mafb,Mbd4,Mre11a,Parp1,Parp2,Plk3,Ppp5c,Psme3,Ptpn6,Rae1,Rb1,Rnf168,Sin3b,Sirt1,Smc5,Syf2,Trp53bp1,Trp53bp2,Tspyl2,Uimc1,Wdr62,Wee1
MP:0002123	abnormal definitive hematopoiesis	0.00104	0.0704	400	4028	Common	Abcb10,Abcb6,Actl6a,Acvrl1,Adam10,Adam17,Adar,Ahr,Ank1,Apc,Ar,Arhgap17,Arid4a,Arid5b,Arntl,Atg7,Atm,Atmin,B4galt1,Bad,Bap1,Batf,Bax,Bcl10,Bcl2,Bcl2l1,Bcl3,Bcl6,Bhlhe40,Bin3,Birc3,Bmf,Bmi1,Bnip3l,Brca2,Bst1,Btk,Bub1b,Cadm1,Carm1,Casp8,Cbfb,Cbx4,Ccnd3,Ccr9,Cd1d1,Cd24a,Cd274,Cd34,Cd36,Cd44,Cd47,Cd59a,Cd72,Cd74,Cd80,Cd81,Cd83,Cd86,Cd9,Cdc25a,Cdk5rap2,Cdkn1b,Cdkn2b,Chordc1,Ciita,Clec4d,Col10a1,Cops5,C…
MP:0000880	decreased Purkinje cell number	0.00111	0.0749	40	4028	Common	Agtpbp1,Als2,Ank3,Arcn1,Arsg,Atf2,Bmi1,Camk4,Dnm1l,Ebf2,Egfr,Ei24,Erbb3,Fbxw7,Fmr1,Fzd4,Gba,Herc1,Ireb2,Ldb1,Lyst,Npc1,Npc2,Numb,Pfdn5,Pi4k2a,Pnpla6,Psap,Pten,Pura,Reln,Smad4,Stxbp1,Sumf1,Thrb,Trim2,Vim,Vps18,Wdr81,Zfp423
MP:0001695	abnormal gastrulation	0.00113	0.0752	162	4028	Common	Adamts9,Aldh1a2,Ankrd11,Apc,Arid1a,Armc5,Axin1,Bcor,Bicral,Bmp4,Cdh2,Cenpj,Chd7,Chrd,Cluap1,Commd1,Cops2,Cops3,Cops5,Csk,Cstf2,Cubn,Cul1,Cul3,Cul4b,Dab2,Dact1,Dag1,Dap3,Daxx,Dctn1,Dhx30,Dhx9,Disp1,Dph1,Dph3,Dpy30,Drap1,Dsp,E4f1,Eif4g2,Enpp2,Ep300,Exoc4,Ezh2,Fermt2,Fgfr2,Flcn,Fntb,Furin,G6pdx,Gata6,Gatad2a,Gclc,Gdf3,Glmn,Grb2,Hccs,Hdac3,Hnrnpc,Hsbp1,Hsp90b1,Htt,Hus1,Ift122,Ift57,Ikbkap,Ilk,Invs,Ip…
MP:0005280	abnormal fatty acid level	0.00113	0.0752	133	4028	Common	Abcd1,Abhd5,Acacb,Acadl,Acot13,Acot7,Acsbg1,Acss1,Adipoq,Aldh2,Amacr,Ank2,Ankrd26,Apc,Arntl,Blvra,Bscl2,C1qtnf1,C3,Cav1,Cavin1,Cc2d1b,Ccar2,Ccdc80,Ccl2,Ccny,Cd36,Ces1d,Chn1,Chuk,Cidea,Cidec,Coq4,Cpt1a,Crat,Crbn,Crtc3,Dap,Dclk1,Decr1,Dgat2,Dip2b,Dixdc1,Dnajc15,Eci1,Ecscr,Ehmt1,Elovl6,Fabp3,Fabp4,Fabp7,Fads2,Fads3,Fasn,Fitm2,G0s2,Gab1,Gfm1,Ghr,Hadh,Hadha,Hmgcr,Hsd17b4,Ift80,Inppl1,Irs1,Itga8,Kdm3a,…
MP:0011090	perinatal lethality, incomplete penetrance	0.00115	0.0759	134	4028	Common	Ackr3,Adam10,Adam17,Adamts1,Aebp1,Agtr1a,Ank1,Apaf1,Apc,Arf6,Arhgap35,Arid5b,Arl13b,Arnt2,Arrdc3,Atp7a,B4gat1,Bbs4,Bcl10,Bicc1,Bmp1,Bmp4,Brca2,Cacna1a,Card10,Carm1,Casp3,Casp9,Cavin1,Cdon,Chrd,Clec16a,Col12a1,Crim1,Cxcr4,Dhrs3,Dicer1,Egfr,Epha3,Eya1,Fancd2,Fbln1,Fbxo11,Flnb,Fmn1,Foxp2,Gadd45gip1,Gata2,Ghr,Gja1,Gnb1,Gpc3,Gys1,Hbegf,Hdac2,Hells,Hip1,Htt,Ift27,Ift80,Igf2r,Ikbkap,Itgb2,Itgb3,Itpa,Jag…
MP:0008143	abnormal dendrite morphology	0.00117	0.0765	102	4028	Common	Acp2,Agtpbp1,Arcn1,Arhgef15,Arhgef6,Atg7,Atm,Bace1,Bcl2l2,Bdnf,Bicd2,C3,Cacna1a,Camk4,Caprin1,Cav1,Ccdc88a,Ccnd2,Cd47,Chmp2b,Ckap5,Cntn1,Coq9,Cul4b,Cyfip2,Dact1,Dbn1,Depdc5,Dlg1,Dlg4,Dpysl2,Dpysl3,Dpysl5,Dync1li1,Ehmt1,Eif4h,Fmr1,Foxp2,Gas1,Git1,Gria1,Grn,Homer1,Ip6k3,Ireb2,Itpr1,Kidins220,Kif21b,Lgi1,Lzts1,Magi2,Map1a,Map1b,Mapk8ip2,Mapt,Mfn2,Mov10,Mtcl1,Myh10,Myo5a,Nedd9,Nenf,Nf1,Npc1,Nptn,Nr1d…
MP:0009549	decreased platelet aggregation	0.00125	0.0808	37	4028	Common	Ap3b1,Bloc1s4,Bloc1s5,Bloc1s6,Capn1,Cd40,Clic1,Emilin1,Emilin2,Fads2,Gnaq,Gnaz,Hps3,Inpp5d,Itga2,Itgb3,Lcp2,Mertk,Nbeal2,P2ry12,Pear1,Pik3c2a,Pik3cb,Pik3cg,Plcg2,Plek,Ptpn9,Rab27a,Rac1,Ranbp10,Rap1b,Scube1,Stim1,Tbxas1,Tec,Unc13d,Vps33a
MP:0000878	abnormal Purkinje cell number	0.00126	0.0808	41	4028	Common	Agtpbp1,Als2,Ank3,Arcn1,Arsg,Atf2,Bmi1,Camk4,Dnm1l,Ebf2,Egfr,Ei24,Erbb3,Fbxw7,Fmr1,Fzd4,Gba,Herc1,Ireb2,Ldb1,Lyst,Npc1,Npc2,Numb,Pfdn5,Pi4k2a,Pnpla6,Psap,Pten,Pura,Rbfox2,Reln,Smad4,Stxbp1,Sumf1,Thrb,Trim2,Vim,Vps18,Wdr81,Zfp423
MP:0004937	dilated heart	0.00128	0.0816	127	4028	Common	Aars2,Abca5,Abi1,Acadvl,Ackr3,Adam19,Adgrg6,Adipoq,Atg5,Bag3,Baz1b,Bcl6,Camta2,Cap2,Capns1,Cast,Casz1,Cav1,Cdh2,Cenpf,Chga,Clcn3,Crkl,Ctnna1,Ctsl,Cyp51,Dag1,Des,Dicer1,Dnaja3,Dnm1l,Dsp,Edn1,Epha3,Fbln5,Fbn1,Fgfr2,Fhod3,Flna,G6pdx,Gab1,Gas2l3,Gja1,Gnaq,Gys1,Hand2,Hbegf,Hccs,Hdac3,Hdac7,Hsd17b7,Htr2b,Igf2r,Ilk,Jag1,Jarid2,Jup,Kidins220,Klf15,Lama4,Lias,Lig3,Mapkap1,Mcoln1,Med1,Mef2c,Mkl1,Mmp2,Mto1,…
MP:0002084	abnormal developmental patterning	0.00132	0.0836	201	4028	Common	2700049A03Rik,Adamts9,Akap17b,Aldh1a2,Ankrd11,Apc,Arid1a,Arl13b,Armc5,Axin1,Bcor,Bicral,Bmp4,Brca2,Cc2d2a,Cdh2,Cdk20,Cenpj,Cep120,Chd7,Chmp5,Chrd,Cluap1,Cnot9,Commd1,Cops2,Cops3,Cops5,Csk,Cstf2,Cubn,Cul1,Cul3,Cul4b,Cyfip1,Dab2,Dact1,Dag1,Dap3,Daxx,Dctn1,Dhx30,Dhx9,Dicer1,Disp1,Dnm1l,Dph1,Dph3,Dpy30,Drap1,Dsp,E4f1,Efnb2,Eif4g2,Enpp2,Ep300,Exoc4,Ezh2,Fermt2,Fgfr2,Flcn,Fntb,Furin,Fuz,G6pdx,Gata6,Gat…
MP:0000813	abnormal hippocampus layer morphology	0.00138	0.0862	51	4028	Common	Aldh2,Atg7,Bicd2,Brpf1,Cadps,Cd81,Cdk5,Ckap5,Clcn3,Cln3,Csf1,Ctnna2,Dag1,Dlg4,Dpysl3,Ehmt1,Ei24,Fmr1,Hdac2,Ireb2,Islr2,Kif2a,Klf7,Lrp8,Lyst,Mapt,Ndel1,Nedd9,Nr4a3,Nsdhl,Pomt2,Psap,Pten,Pura,Rac1,Reln,Rnf19a,Scyl2,Spg11,Ssb,Stam,Syn1,Tnr,Top2b,Tsc2,Tuba1a,Usp14,Ywhae,Ywhaz,Zbtb18,Zfp521
MP:0001513	limb grasping	0.00138	0.0862	119	4028	Common	Adipor2,Akap12,Ankib1,Ap4e1,Araf,Arl6ip1,Aspa,Atg5,Atg7,Atp13a2,B4gat1,Bdnf,Bicd2,Bmp4,Brpf1,Cacna1a,Cadm4,Camk4,Cav1,Cers6,Cln3,Cln8,Col12a1,Cplx2,Ctnna2,Dag1,Dbnl,Ddc,Depdc5,Dmtf1,Dnajc11,Dnajc5,Dock3,Dpysl5,Dysf,Ei24,Elavl4,Elovl6,Epb41l3,Epha4,Fig4,Fkrp,Gdap1,Glrb,Gnptab,Golga1,Herc1,Hprt,Hspa4,Hspd1,Htt,Ikbkap,Inpp4a,Kcna2,Lama2,Lama4,Lamb1,Lamc1,Lpin1,Ltn1,Mbp,Mcoln1,Meox2,Mpz,Mtmr2,Ndrg1,N…
MP:0004966	abnormal inner cell mass proliferation	0.00141	0.0874	42	4028	Common	Ahctf1,Cenpe,Chordc1,Cops2,Cops5,Cops8,Dab2,Espl1,Ezh2,Fntb,Gadd45gip1,Gata6,Grb2,Hsd17b12,Hspa5,Kat8,Lin9,Mad2l1,Max,Mcm4,Mtor,Ncapg2,Paxip1,Pelo,Prmt5,Prpf19,Psmd4,Rptor,Ruvbl1,Sbds,Setdb1,Smad4,Smarca5,Smarcb1,Stat3,Terf1,Tex10,Thap11,Tsg101,Txn1,Zfp24,Zpr1
MP:0005022	abnormal immature B cell morphology	0.00145	0.0893	83	4028	Common	Adam10,Ar,Arhgap17,Arntl,Atm,Atmin,Bax,Bcl2,Bcl3,Birc3,Bmf,Bmi1,Bst1,Btk,Cd24a,Cd36,Cd72,Cd74,Cd80,Cxcr4,Cyld,Def6,Dicer1,Dll4,Dynll1,Ebf1,Ell2,Ep300,Eps15,Erg,Esr1,Ezh1,Ezh2,Fas,Fnip1,Grb2,Hax1,Ikbkb,Ikzf1,Il2rg,Il7r,Irf8,Kdelr1,Lyn,Map3k14,Mcl1,Mtor,Mtss1,Nfkb2,Nfkbia,Noc2l,Npy1r,Pik3r1,Plcg2,Ppp2r3c,Prkcd,Ptch1,Ptpn2,Ptpn22,Ptpn6,Ptprc,Rad50,Rc3h1,Rnf8,Runx1,Sh3bp2,Smarcc1,Sox4,Spns2,Sppl2a,St…
MP:0001553	abnormal circulating free fatty acids level	0.00149	0.0908	101	4028	Common	Abhd5,Acadl,Acot13,Acot7,Acss1,Adipoq,Aldh2,Ank2,Ankrd26,Apc,Arntl,Bscl2,C1qtnf1,C3,Cav1,Cavin1,Cc2d1b,Ccdc80,Ccl2,Ccny,Cd36,Ces1d,Chn1,Chuk,Cidec,Coq4,Cpt1a,Crat,Crbn,Crtc3,Dap,Dclk1,Dgat2,Dip2b,Dixdc1,Dnajc15,Ecscr,Ehmt1,Fabp3,Fasn,G0s2,Gab1,Gfm1,Ghr,Hadh,Hadha,Hmgcr,Ift80,Inppl1,Irs1,Itga8,Kdm3a,Kif26b,Ldlr,Lipe,Lonrf3,Lpin2,Mier1,Mlxipl,Nfkb1,Nfkbid,Nos3,Npy1r,Nsun2,Nuak2,Nus1,Osm,Pck1,Pdk4,P…
MP:0011913	abnormal reticulocyte cell number	0.0015	0.0908	52	4028	Common	Abcb10,Add1,Add2,Ank1,Atad5,Bnip3l,Cd47,Cd59a,Cdk5rap2,Chordc1,Dck,Dhx36,Dmtn,Exoc6,Flvcr1,Gmnn,Gpi1,Hk1,Hyal2,Ikzf1,Itgb3,Jak2,Kdm1a,Kitl,Lama4,Ldha,Lgmn,Man2a1,Mcat,Mcm3,Mcm4,Mgat2,Myo1e,Nckap1l,Nfe2l2,Npm1,Pfkm,Prdx1,Prkaa1,Pura,Rhbdf1,Sgpl1,Slc11a2,Slc20a1,Smap1,Sptlc2,Stat5b,Steap3,Tiparp,Ttc7,Ulk1,Uros
MP:0010832	lethality during fetal growth through weaning	0.00156	0.0936	859	4028	Common	Abca3,Abcb7,Abcc9,Abhd5,Acadm,Ackr3,Acvrl1,Adam10,Adam12,Adam17,Adam19,Adam22,Adam23,Adamts1,Adar,Adarb1,Adcy3,Adcyap1r1,Adgrl2,Adk,Adm,Aebp1,Agtr1a,Ahi1,Ahr,Aimp2,Akap6,Akna,Aldh1a2,Aldh1a3,Aldh5a1,Ambra1,Angptl4,Ank1,Ank2,Ank3,Ano6,Ap3b1,Apaf1,Apc,Apob,Aprt,Araf,Arf6,Arfgef1,Arhgap1,Arhgap35,Arid1a,Arid1b,Arid5b,Arih2,Arl13b,Arl3,Arl8b,Arnt2,Arrdc3,Asl,Ass1,Asxl2,Ate1,Atf2,Atg12,Atg16l1,Atg3,At…
MP:0005370	liver/biliary system phenotype	0.00158	0.0942	579	4028	Common	4933434E20Rik,Abca5,Abcb10,Abcb7,Abcc3,Abcd3,Abcg2,Abhd5,Acad8,Acadl,Acadm,Acads,Acadvl,Acot13,Acot7,Acvrl1,Adamts7,Adar,Adcy3,Add2,Adipoq,Adipor2,Adk,Adm,Aebp1,Agl,Agpat5,Ahr,Akap10,Akap12,Aldh1a1,Aldh2,Aldob,Amacr,Amfr,Ank1,Ank2,Anks6,Anxa7,Apc,Apob,Ar,Arf6,Arhgap1,Arid4a,Arih2,Arl3,Arntl,Arrdc3,Arsg,Atad5,Atg5,Atg7,Atm,Atox1,Atp7a,Atr,Azin1,Bag1,Bag3,Bbs2,Bbs4,Bckdk,Bcl6,Bco2,Becn1,Bicc1,Bid,B…
MP:0012114	absent inner cell mass proliferation	0.00162	0.0956	28	4028	Common	Ahctf1,Chordc1,Cops2,Cops5,Dab2,Ezh2,Gadd45gip1,Grb2,Hspa5,Kat8,Lin9,Mad2l1,Max,Mcm4,Mtor,Ncapg2,Pelo,Prmt5,Prpf19,Psmd4,Sbds,Smarca5,Smarcb1,Terf1,Thap11,Tsg101,Txn1,Zfp24
MP:0000702	enlarged lymph nodes	0.00162	0.0956	86	4028	Common	Ank1,Ap4e1,Arhgef6,B3gnt5,Bcl2,Bhlhe40,Birc3,C9orf72,Casp8,Cd86,Cdkn1a,Cdkn2b,Ciz1,Coro1a,Ctsl,Cyld,D630045J12Rik,Ddost,Def6,Dennd1b,Dicer1,Drosha,Ep300,Ezh2,Fas,Fcgr2b,Gtpbp2,H2-Aa,Ifi44,Ikzf1,Inpp5d,Irf2,Irf8,Itch,Itgal,Itgb2,Lbr,Lgals9,Lpin2,Lyn,Map3k14,Mark2,Mcm4,Mgat2,Myc,Nfatc2,Nfe2l2,Nfkb1,Nfkb2,Nfkbiz,Nlrp3,Notch3,Peli1,Pik3c2a,Pim1,Ppp2ca,Prkcd,Prkch,Pten,Ptpn2,Ptpn22,Ptpn6,Ptprc,Rasgrp1…
MP:0008565	decreased interferon-beta secretion	0.00164	0.0957	17	4028	Common	Cd200r1,Dhx58,Hcfc2,Ifnar1,Ifnar2,Irf1,Irf7,Map3k8,Mex3c,Msr1,Nlrc5,Peli1,Rsad2,Tbk1,Tlr3,Tlr4,Tradd
MP:0008026	abnormal brain white matter morphology	0.00165	0.0958	105	4028	Common	4933434E20Rik,Akt3,Ank2,Ap3b1,Ap4e1,App,Arfgef1,Arhgap35,Arid1b,Aspa,Atr,Atrn,Bicd2,Bmi1,Brpf1,Cacnb3,Canx,Casp9,Cav1,Cd81,Cers2,Chd7,Clip2,Dbn1,Dclk1,Dhx35,Dnm1l,Ebf1,Efnb1,Efnb2,Ei24,Eif2b4,Eif2b5,Eif4h,Epha4,Fbxo45,Fgfr2,Fzd3,Galc,Gap43,Gnptab,H13,Hspa5,Htt,Ireb2,Isl1,Islr2,Itsn1,Kif1b,Kif1bp,Kif3a,Klc1,Klf7,Map1b,Map2k4,Map3k12,Marcksl1,Mbp,Morc2a,Mycbp2,Napa,Nfib,Nmnat2,Nos2,Npc1,Nrp1,Nrp2,N…
MP:0004792	abnormal synaptic vesicle number	0.00166	0.0958	25	4028	Common	Ap1s2,Bsn,C3,Cadps,Dnajc6,Erc2,Fgf7,Fgfr2,Gdi1,Kif1b,Madd,Map6,Nbea,Pacsin1,Pak3,Pcdh17,Pclo,Pfn2,Pten,Sirpa,Slc7a5,Snap91,Syde1,Syn2,Tnr
MP:0000920	abnormal myelination	0.00169	0.096	96	4028	Common	Abcd1,Adam22,Adgrg6,Aspa,Atrn,Bace1,Cadm3,Cadm4,Canx,Cd300lf,Cd36,Cd59a,Cd86,Cemip,Cisd2,Cln6,Cln8,Cnp,Cntnap1,Coq9,Cp,Cx3cr1,Cxcl10,Cyth1,Cyth2,Dag1,Dlg1,Dock8,Eif2b5,Epb41l3,Ezh2,Fas,Fdft1,Fig4,Gabbr1,Galc,Gars,Gdap1,Gnptab,H2-D1,Hsd17b4,Htt,Il1b,Itga6,Lama2,Lama4,Lamc1,Lgi4,Litaf,Lmnb1,Lpin1,Mal,Map1b,Mbp,Mmp12,Mnat1,Mpz,Mtmr2,Mtor,Myrf,Ndrg1,Nf1,Npc1,Nrcam,Nrd1,Nrg1,Pex7,Pik3ca,Pitpna,Plp1,Pm…
MP:0003141	cardiac fibrosis	0.00169	0.096	96	4028	Common	Aars,Abcb8,Acadl,Acadm,Ackr3,Agtr1a,Ahr,Akap6,Ar,Asxl2,Atr,Bag3,Bcl6,Bnip3l,Cap2,Capns1,Cav1,Cenpf,Coq9,Ctsl,Dag1,Des,Dnaja3,Dnm1l,Dsp,Dusp6,Egfr,F3,Fbn1,Fosl2,Fstl1,Gas2l3,Gja1,Gnaq,Gys1,Hadhb,Hbegf,Hccs,Hdac3,Ilk,Inpp5f,Jup,Lama4,Map2k3,Mapk14,Mapk8,Med1,Med30,Mef2d,Mtor,Mtpn,Myh10,Nckap1l,Ndufs6,Nek6,Nexn,Nol3,Npr1,Npy1r,Opa3,Pak1,Pdgfrb,Pdlim3,Pfkfb3,Plat,Ppara,Ppp1r13l,Ppp3ca,Prkd1,Ptgs2,Ptk…
MP:0013659	abnormal erythroid lineage cell morphology	0.00174	0.098	389	4028	Common	Abca6,Abcb10,Abcb6,Acp2,Actl6a,Acvrl1,Adam10,Adam17,Adamts7,Adar,Add1,Add2,Agap1,Agpat1,Agtr1a,Alas2,Aldh3a2,Ampd3,Angel1,Ank1,Anxa7,Ap4e1,Apbb2,Apc,Apex2,Appl1,Appl2,Aprt,Ar,Arhgap25,Arid4a,Arl6ip1,Arpc1b,Arpc2,Asl,Asns,Aspa,Atad5,Atg16l1,Atmin,Atp6v0d1,Atp6v1b2,Atp8a1,Atxn3,B4galt1,Bag1,Bap1,Bcl6b,Bdh2,Bhlhe40,Bmi1,Bmp4,Bnip3l,Bola2,Btrc,Bub1b,C9orf72,Cab39l,Cand2,Capns1,Casp8,Cbfb,Cby1,Ccnd3,C…
MP:0013664	abnormal immature B cell number	0.00175	0.098	80	4028	Common	Adam10,Ar,Arhgap17,Arntl,Atm,Atmin,Bax,Bcl2,Bcl3,Birc3,Bmf,Bmi1,Bst1,Btk,Cd24a,Cd36,Cd72,Cd74,Cd80,Cxcr4,Cyld,Def6,Dicer1,Dll4,Dynll1,Ebf1,Ell2,Eps15,Erg,Esr1,Ezh1,Ezh2,Fas,Fnip1,Grb2,Hax1,Ikbkb,Ikzf1,Il2rg,Il7r,Irf8,Kdelr1,Lyn,Map3k14,Mcl1,Mtor,Mtss1,Nfkb2,Nfkbia,Noc2l,Npy1r,Pik3r1,Plcg2,Ppp2r3c,Prkcd,Ptch1,Ptpn2,Ptpn22,Ptpn6,Ptprc,Rad50,Rc3h1,Rnf8,Runx1,Sh3bp2,Sox4,Spns2,Sppl2a,St6gal1,Syk,Tcf1…
MP:0000849	abnormal cerebellum morphology	0.00177	0.0985	191	4028	Common	Aars,Acp2,Adamts4,Adgrg1,Agtpbp1,Ahi1,Akap12,Akt3,Als2,Ank1,Ank3,Arcn1,Arfgef1,Arsg,Ass1,Astn1,Atf2,Atg4b,Atg5,Atg7,Atm,Atp7a,Atr,Atrn,Bcl2l2,Bdnf,Bicd2,Bmi1,Cacna1a,Cadps,Camk4,Camta1,Canx,Car8,Casp3,Ccm2,Ccnd2,Cdk5,Cep290,Cers2,Chp1,Cln3,Cntn1,Cntnap1,Cp,Ctnna2,Cxcr4,Dag1,Ddb1,Dner,Dnm1l,Dock3,Dpysl5,Ebf2,Egfr,Ei24,Eif2b4,Eif2b5,Eif4h,Eno2,Erbb3,Fbxw7,Fign,Fkrp,Fmr1,Foxp2,Fzd4,Galc,Gas1,Gba,Gja…
MP:0010954	abnormal cellular respiration	0.00178	0.0985	73	4028	Common	Abcg2,Acacb,Acadvl,Acss1,Adipoq,Ak1,Aldh2,Apaf1,Bco2,Bscl2,Casp9,Cav1,Cd163,Cept1,Cers6,Chchd10,Cisd1,Cisd2,Ckm,Clpp,Coq7,Coq9,Cox15,Crat,Dnaja3,Dnajc15,Dnm1l,Gpt2,Hccs,Hdac3,Hspb2,Hspb8,Hspd1,Htr2b,Kcna1,Lacc1,Lclat1,Lig3,Mcat,Mfn2,Mterf2,Mterf3,Ndufs6,Nln,Noa1,Nr2f2,Opa1,Park7,Pdss2,Pink1,Pnpla8,Pnpt1,Ppard,Prdm16,Ptcd2,Sat1,Sdhd,Sirt1,Sirt3,Slc25a12,Snca,Sqstm1,Tfam,Tgm2,Trmu,Tspo,Txnip,Ucp2,U…
MP:0009940	abnormal hippocampus pyramidal cell morphology	0.00179	0.0985	32	4028	Common	Aldh2,Atg7,Cadps,Cd81,Ckap5,Clcn3,Cln3,Csf1,Ctnna2,Dlg4,Dpysl3,Ehmt1,Ei24,Fmr1,Hdac2,Ireb2,Islr2,Klf7,Lyst,Mapt,Ndel1,Nr4a3,Pten,Scyl2,Spg11,Ssb,Stam,Syn1,Tsc2,Tuba1a,Usp14,Ywhaz
MP:0010770	preweaning lethality	1.62e-16	1.02e-12	492	983	Mouse	4932438A13Rik,Abca1,Acaca,Acan,Acbd3,Ace,Actr3,Acvr2a,Adcy7,Adcy9,Aebp2,Aff1,Aff4,Ago2,Ahnak,Akap13,Alpl,Angpt2,Ankfy1,Arf1,Arhgap29,Arhgap5,Arhgef1,Arhgef12,Arid2,Arnt,Ash1l,Atad3a,Atp11a,Atp1a2,Atp2a2,Atrx,Atxn1l,Bahcc1,Bcl2l11,Bclaf1,Birc6,Bmpr1a,Bmpr2,Bptf,Braf,Brd1,Brd2,Bsg,C1galt1,C1qbp,C2cd3,Cabin1,Cacna1c,Cant1,Cbfa2t2,Cbl,Cbx5,Ccbe1,Cdc42,Cdc73,Cdh5,Cdk12,Cenpo,Cflar,Chd2,Chd4,Chd8,Ckap4…
MP:0002080	prenatal lethality	1.21e-13	3.82e-10	303	983	Mouse	Abca1,Acaca,Actr3,Acvr2a,Adcy7,Aebp2,Aff4,Ago2,Akap13,Ankfy1,Arf1,Arhgap29,Arhgef12,Arid2,Arnt,Atad3a,Atp2a2,Atrx,Bcl2l11,Birc6,Bmpr1a,Bmpr2,Bptf,Braf,Brd1,Brd2,Bsg,C1galt1,C1qbp,C2cd3,Cabin1,Cacna1c,Cbl,Ccbe1,Cdc42,Cdc73,Cdh5,Cdk12,Cenpo,Cflar,Chd2,Chd4,Chd8,Cnbp,Col2a1,Col3a1,Col4a1,Col4a2,Cop1,Cplane1,Creb1,Crebbp,Crk,Ctdsp2,Ctdspl2,Ctnnb1,Cxcl12,Cycs,Daam1,Ddx3x,Dido1,Dlc1,Dnajc8,Dnmt1,Dock1,…
MP:0010769	abnormal survival	3.34e-13	7.01e-10	528	983	Mouse	4932438A13Rik,Abca1,Acaca,Acan,Acbd3,Ace,Actr3,Acvr2a,Adcy7,Adcy9,Adgrf5,Aebp2,Aff1,Aff2,Aff4,Ago2,Ahnak,Akap13,Alkbh1,Alpl,Angpt2,Ankfy1,Arf1,Arhgap29,Arhgap5,Arhgef1,Arhgef12,Arid2,Arnt,Ash1l,Atad3a,Atp11a,Atp1a2,Atp2a2,Atrx,Atxn1,Atxn1l,Atxn7,Bahcc1,Bcl2l11,Bclaf1,Birc6,Bmpr1a,Bmpr2,Bptf,Braf,Brd1,Brd2,Bsg,C1galt1,C1qa,C1qbp,C2cd3,Cabin1,Cacna1c,Cant1,Cbfa2t2,Cbl,Cbx5,Ccbe1,Cd2ap,Cdc42,Cdc73,C…
MP:0005378	growth/size/body region phenotype	1.82e-11	2.87e-08	493	983	Mouse	Abca1,Abl2,Acaca,Acan,Ace,Acot11,Acox1,Acvr2a,Adgrf5,Adipor1,Adrb3,Aebp2,Aff1,Aff2,Aff4,Ago1,Ago2,Ahcyl1,Ahnak,Akap13,Alkbh1,Alms1,Alpl,Angptl2,Antxr1,Anxa6,Arhgap23,Arhgap29,Arhgap5,Arhgef2,Arnt,Ash1l,Atad2b,Atad3a,Atf6,Atp11a,Atp2a2,Atp8b1,Atrx,Atxn1,Atxn1l,Atxn7,B3galt2,Bclaf1,Bcr,Birc6,Bmpr1a,Bmpr2,Bptf,Braf,Brd1,Brd2,Brwd3,Bsg,Btaf1,C1galt1,C1qbp,C3ar1,Cacna1d,Cbfa2t2,Cbl,Cbx5,Cbx7,Ccr2,Cd2a…
MP:0010768	mortality/aging	2.82e-11	3.55e-08	567	983	Mouse	4932438A13Rik,A4galt,Abca1,Abcc1,Acaca,Acan,Acbd3,Ace,Acer3,Actr3,Acvr2a,Adcy7,Adcy9,Adgrf5,Aebp2,Aff1,Aff2,Aff4,Ago2,Ahnak,Akap13,Alkbh1,Alpl,Angpt2,Ankfy1,Antxr1,Arf1,Arhgap29,Arhgap5,Arhgef1,Arhgef12,Arid2,Arnt,Ash1l,Atad3a,Atf6,Atp11a,Atp1a2,Atp2a2,Atrx,Atxn1,Atxn1l,Atxn7,Axl,Bahcc1,Bcl2l11,Bclaf1,Birc6,Bmpr1a,Bmpr2,Bptf,Braf,Brd1,Brd2,Bsg,C1galt1,C1qa,C1qbp,C2cd3,C3ar1,C4b,Cabin1,Cacna1c,Cac…
MP:0004196	abnormal prenatal growth/weight/body size	3.75e-11	3.94e-08	169	983	Mouse	Abca1,Acaca,Acvr2a,Aff4,Ago2,Akap13,Alkbh1,Arnt,Atad3a,Atp2a2,Atrx,Birc6,Bmpr1a,Bmpr2,Bptf,Braf,Brd1,Brd2,Brwd3,Btaf1,C1qbp,Cbfa2t2,Cdc42,Cdc73,Cdh5,Cflar,Chd2,Ckap4,Cluh,Cnbp,Col27a1,Col2a1,Cplane1,Creb1,Crebbp,Ctnnb1,Cycs,Daam1,Ddx3x,Dgkd,Dlc1,Dnmt3a,Dyrk1a,Epb41l5,Ern1,Exoc8,Ext1,Eya4,F2r,Fam208a,Fgfr1,Fgfrl1,Fn1,Foxo1,Frs2,Fubp1,G3bp1,Gabpa,Gjc1,Glg1,Gli3,Grb10,Greb1l,Hcfc1,Hspg2,Huwe1,Igf1,I…
MP:0000452	abnormal mouth morphology	8.65e-11	7.03e-08	94	983	Mouse	Acan,Acvr2a,Alkbh1,Alpl,Antxr1,Arhgap29,Bmpr1a,Braf,Cdc42,Clcn5,Col2a1,Cplane1,Cramp1l,Creb3l2,Crebbp,Crk,Csf1r,Ctnnb1,Dcn,Dst,Dync2h1,Dzip1l,Ece1,Efna5,Ermp1,Evc,Ext1,Eya4,Fgfr1,Foxn3,Glg1,Gli3,Golgb1,Grem2,Hipk2,Hspg2,Ift172,Il1r1,Inhba,Irf6,Itgav,Itgb1,Itgb4,Kat6a,Kcnj2,Lama5,Large1,Lima1,Lmna,Lpar1,Lrp6,Ltbp3,Luzp1,Map3k7,Mau2,Mbd5,Mbtps1,Mecp2,Megf8,Mnt,Ncoa3,Ncor2,Ndst1,Nf2,Nipbl,Notch2,Pbx…
MP:0001785	edema	8.92e-11	7.03e-08	93	983	Mouse	Adcy9,Ago2,Angpt2,Arid2,Atp11a,Atp2a2,Bcr,Birc6,Braf,Brd2,Btaf1,C2cd3,Ccbe1,Cdc42,Cdh5,Cfh,Cflar,Chd2,Clu,Col4a2,Cop1,Cplane1,Crk,Ctnnb1,Cyp26b1,Ddx3x,Dock1,Ece1,Eya4,F2r,Flrt2,Foxp1,Gli3,Hpgds,Ift172,Igf1r,Itga3,Itgav,Itgb1,Itgb4,Kat6a,Kmt2a,Kmt2b,Kmt2d,Kras,Lama5,Lmna,Map3k20,Map3k7,Mdm4,Megf8,Mib1,Mkl2,Myocd,Naca,Ncor1,Nfat5,Nfatc3,Ngf,Notch2,Pam,Pbx1,Pcnt,Pdgfra,Pkn2,Podxl,Por,Ptpn11,Ptpn14,P…
MP:0005380	embryo phenotype	1.16e-10	8.14e-08	245	983	Mouse	Abca1,Acaca,Actr3,Acvr2a,Adcy9,Aff4,Ago2,Akap13,Alkbh1,Arhgap29,Arnt,Ash1l,Atad3a,Atp11a,Atp1a2,Atp2a2,Atrx,Birc6,Bmpr1a,Bmpr2,Bptf,Braf,Brd1,Brd2,Brwd3,Btaf1,C1qbp,C2cd3,Cacna1c,Cdc42,Cdc73,Cdh5,Cdk12,Cflar,Chd4,Chd8,Ckap4,Cluh,Cnbp,Col27a1,Col2a1,Col4a1,Col4a2,Cox7b,Cplane1,Crebbp,Ctnnb1,Cycs,Cyp26b1,Daam1,Ddx3x,Dido1,Dlc1,Dlg3,Dnmt1,Dnmt3a,Dync2h1,Dyrk1a,Ece1,Efna5,Egln1,Ep400,Epb41l5,Ern1,Exo…
MP:0000432	abnormal head morphology	1.45e-10	9.17e-08	138	983	Mouse	Acan,Acvr2a,Alkbh1,Alpl,Antxr1,Arhgap29,Arhgef2,Arnt,Atp11a,Bmpr1a,Braf,Brd2,Brwd3,Btaf1,Cbl,Cdc42,Cep63,Clcn5,Col11a2,Col27a1,Col2a1,Col4a2,Cplane1,Cramp1l,Creb3l2,Crebbp,Crk,Csf1r,Ctnnb1,Dcn,Ddx3x,Dock1,Dst,Dync2h1,Dyrk1a,Dzip1l,Ece1,Efna5,Ermp1,Evc,Evc2,Ext1,Eya4,F7,Fat1,Fgfr1,Fgfrl1,Fn1,Foxn3,Frs2,Glg1,Gli3,Golgb1,Grem2,Hectd1,Hipk2,Hspg2,Huwe1,Ift172,Il1r1,Inhba,Irf6,Itgav,Itgb1,Itgb4,Kat6a,…
MP:0006207	embryonic lethality during organogenesis	2.96e-10	1.69e-07	133	983	Mouse	Acaca,Acvr2a,Aff4,Akap13,Arid2,Arnt,Atp2a2,Atrx,Bcl2l11,Bmpr1a,Bmpr2,Bptf,Braf,Brd1,Brd2,C1qbp,C2cd3,Cabin1,Cdh5,Cflar,Cnbp,Cop1,Crebbp,Ctnnb1,Cycs,Dlc1,Dync2h1,Dyrk1a,Ece1,Egln1,Ep400,Epb41l5,Erbb4,Ern1,Ext1,F2r,Fam210a,Fgd5,Fgfr1,Flrt2,Flt1,Fn1,Foxo1,Frs2,Gjc1,Gli3,Gpr161,Hspb7,Hspg2,Huwe1,Ift172,Ikbkg,Itga4,Itgav,Itgb1,Kit,Kmt2a,Kmt2b,Kmt2d,Kras,Krit1,Letm1,Lrp1,Map3k20,Map3k3,Map3k7,Mau2,Mdm4…
MP:0003956	abnormal body size	7.87e-10	4.14e-07	340	983	Mouse	Abca1,Abl2,Acan,Ace,Acot11,Acox1,Adgrf5,Adipor1,Adrb3,Aff1,Aff2,Aff4,Ago1,Ahnak,Alms1,Alpl,Angptl2,Anxa6,Arhgap23,Arhgap5,Arnt,Ash1l,Atad2b,Atp2a2,Atp8b1,Atrx,Atxn1,Atxn1l,Atxn7,B3galt2,Bclaf1,Bcr,Bmpr1a,Bmpr2,Braf,Brd2,Bsg,C1galt1,Cacna1d,Cbfa2t2,Cbl,Cbx5,Cbx7,Ccr2,Cdc42,Cdc73,Cdk6,Cdkal1,Cep63,Cflar,Chd2,Clock,Cluh,Col11a2,Col1a2,Col27a1,Col2a1,Col3a1,Col4a1,Col6a3,Cop1,Cpe,Cpeb4,Crebbp,Crebrf,…
MP:0000266	abnormal heart morphology	1.21e-09	5.88e-07	204	983	Mouse	Abca1,Acan,Ace,Adcy9,Ago2,Akap13,Arhgef1,Arid2,Atp11a,Atp1a2,Atp2a2,Atrx,Bmpr1a,Bmpr2,Braf,Brd2,Btaf1,C2cd3,Cacna1c,Camk2d,Cd2ap,Cdc73,Cdh5,Cflar,Chd2,Clu,Col18a1,Col1a2,Col2a1,Col3a1,Col4a2,Cop1,Cplane1,Crebbp,Crk,Csf3r,Ctdsp2,Ctnnb1,Cxcl12,Daam1,Ddx3x,Dlc1,Dmd,Dock1,Dtna,Dync2h1,Dyrk1a,Ece1,Egln1,Emc8,Enpp1,Entpd1,Epb41l5,Erbb4,Ermp1,F2r,F7,Fat4,Fgfr1,Fgfrl1,Flrt2,Flt1,Fn1,Foxo1,Foxp1,Frs2,Fubp…
MP:0005382	craniofacial phenotype	1.48e-09	6.57e-07	162	983	Mouse	Acan,Acvr2a,Adcy9,Akap13,Alkbh1,Alpl,Antxr1,Arhgap29,Arnt,Atp11a,Atxn1l,Bmpr1a,Braf,Brd2,Cbl,Cdc42,Cdc73,Cdh5,Chsy1,Clcn5,Cnbp,Col11a2,Col18a1,Col27a1,Col2a1,Col4a2,Cplane1,Cramp1l,Creb3l2,Crebbp,Crk,Csf1r,Ctnnb1,Cycs,Cyp26b1,Dcn,Dlc1,Dock1,Dst,Dync2h1,Dyrk1a,Dzip1l,Ece1,Efna5,Eml1,Ermp1,Evc,Evc2,Ext1,Eya4,F7,Fat1,Fgfr1,Fgfrl1,Fn1,Foxn3,Foxo1,Frs2,Fzd1,G3bp1,Glg1,Gli3,Golgb1,Gpr161,Grem2,Hectd1,H…
MP:0010865	prenatal growth retardation	1.56e-09	6.57e-07	104	983	Mouse	Abca1,Acaca,Aff4,Ago2,Akap13,Alkbh1,Arnt,Atad3a,Atrx,Birc6,Bmpr2,Bptf,Braf,Brd1,Brd2,Brwd3,Btaf1,C1qbp,Cdh5,Cflar,Chd2,Cplane1,Crebbp,Ctnnb1,Cycs,Ddx3x,Dlc1,Dyrk1a,Ern1,F2r,Fam208a,Fgfr1,Fgfrl1,Fn1,Foxo1,Frs2,Fubp1,G3bp1,Gjc1,Gli3,Grb10,Huwe1,Igf1,Igf1r,Ino80,Itgav,Itgb1,Kmt2b,Kmt2d,Kras,Krit1,Letm1,Lrp1,Map3k20,Mib1,Myh9,Myocd,Naca,Nedd4,Notch2,Pcnt,Pdgfa,Pdgfra,Pdha1,Pex5,Picalm,Plcg1,Plk2,Pmm2…
MP:0002925	abnormal cardiovascular development	4.78e-09	1.88e-06	122	983	Mouse	Adcy9,Akap13,Angpt2,Arid2,Arnt,Atp11a,Atp2a2,Birc6,Bmpr1a,Bmpr2,Braf,Brd2,C1galt1,C2cd3,Cacna1c,Cdh5,Cflar,Col4a2,Cop1,Cplane1,Crebbp,Ctnnb1,Cxcl12,Daam1,Dlc1,Dock1,Dusp3,Dync2h1,Ece1,Egln1,Epb41l5,Erbb4,F2r,Fgf2,Fgfr1,Fgfrl1,Flt1,Fn1,Foxo1,Foxp1,Fzd5,Gja5,Gjc1,Gli3,Greb1l,Hexim1,Hspb7,Hspg2,Ift172,Il6st,Itgav,Itgb1,Itgb4,Kat6a,Klf3,Kmt2b,Kmt2d,Kras,Krit1,Lama5,Lepr,Lmna,Lrp1,Map3k3,Map3k7,Mdm4,M…
MP:0010832	lethality during fetal growth through weaning	6.28e-09	2.33e-06	266	983	Mouse	Abca1,Acan,Ace,Acvr2a,Adcy7,Aff1,Aff4,Ago2,Alpl,Angpt2,Arhgap5,Arnt,Atp1a2,Atp2a2,Atrx,Atxn1l,Bahcc1,Bclaf1,Birc6,Bmpr1a,Bmpr2,Braf,Brd1,Brd2,Bsg,C1galt1,Cacna1c,Cbfa2t2,Cbl,Cdc42,Cdh5,Chd2,Cluh,Cnbp,Col1a2,Col27a1,Col2a1,Col3a1,Col4a1,Col4a2,Cop1,Cpeb4,Creb1,Creb3l2,Creb5,Crebbp,Crk,Csf1r,Ctnnb1,Cux1,Cxcl12,Cycs,Cyp26b1,Daam1,Ddx3x,Dgkd,Dnmt3a,Dock1,Dst,Dyrk1a,Ece1,Efna5,Egln1,Ets1,Evc,Evc2,Ext1…
MP:0002089	abnormal postnatal growth/weight/body size	7.5e-09	2.63e-06	369	983	Mouse	Abca1,Abl2,Acan,Ace,Acot11,Acox1,Adgrf5,Adipor1,Adrb3,Aff1,Aff2,Aff4,Ago1,Ahcyl1,Ahnak,Alkbh1,Alms1,Alpl,Angptl2,Anxa6,Arhgap23,Arhgap5,Arnt,Ash1l,Atad2b,Atp2a2,Atp8b1,Atrx,Atxn1,Atxn1l,Atxn7,B3galt2,Bclaf1,Bcr,Bmpr1a,Bmpr2,Braf,Brd2,Bsg,C1galt1,C3ar1,Cacna1d,Cbfa2t2,Cbl,Cbx5,Cbx7,Ccr2,Cd2ap,Cdc42,Cdc73,Cdk6,Cdkal1,Cep63,Cflar,Chd2,Chd4,Clock,Cluh,Col11a2,Col1a2,Col27a1,Col2a1,Col3a1,Col4a1,Col6a…
MP:0000428	abnormal craniofacial morphology	1.06e-08	3.5e-06	156	983	Mouse	Acan,Acvr2a,Adcy9,Akap13,Alkbh1,Alpl,Antxr1,Arhgap29,Arnt,Atp11a,Atxn1l,Bmpr1a,Braf,Brd2,Cbl,Cdc42,Cdc73,Cdh5,Chsy1,Clcn5,Cnbp,Col11a2,Col18a1,Col27a1,Col2a1,Col4a2,Cplane1,Cramp1l,Creb3l2,Crebbp,Crk,Csf1r,Ctnnb1,Cycs,Cyp26b1,Dcn,Dlc1,Dock1,Dst,Dync2h1,Dyrk1a,Dzip1l,Ece1,Efna5,Eml1,Ermp1,Evc,Evc2,Ext1,Eya4,F7,Fat1,Fgfr1,Fgfrl1,Foxn3,Foxo1,Frs2,G3bp1,Glg1,Gli3,Golgb1,Gpr161,Grem2,Hectd1,Hipk2,Hspg…
MP:0011098	embryonic lethality during organogenesis, complete penetrance	1.38e-08	4.35e-06	107	983	Mouse	Akap13,Arid2,Arnt,Atp2a2,Atrx,Bmpr1a,Bmpr2,Bptf,Braf,Brd2,C1qbp,C2cd3,Cabin1,Cdh5,Cflar,Cnbp,Cop1,Crebbp,Ctnnb1,Cycs,Dlc1,Dync2h1,Egln1,Ep400,Epb41l5,Erbb4,Ern1,Ext1,Fam210a,Fgd5,Fgfr1,Flt1,Fn1,Foxo1,Frs2,Gjc1,Gpr161,Hspb7,Huwe1,Ift172,Ikbkg,Itga4,Itgb1,Kit,Kmt2a,Kmt2b,Kmt2d,Kras,Krit1,Lrp1,Map3k20,Map3k3,Map3k7,Mau2,Mdm4,Med12,Mib1,Myh9,Myocd,Ndufa5,Nipbl,Notch2,Nsd1,Numa1,Pdgfra,Pkn2,Plcg1,Pmm2…
MP:0002127	abnormal cardiovascular system morphology	2.53e-08	7.59e-06	256	983	Mouse	Abca1,Acan,Ace,Adcy9,Ago2,Akap13,Angpt2,Anpep,Arhgef1,Arid2,Arnt,Atp11a,Atp1a2,Atp2a2,Atrx,Birc6,Bmpr1a,Bmpr2,Braf,Brd2,Btaf1,C1galt1,C2cd3,Cacna1c,Camk2d,Cant1,Ccr2,Cd2ap,Cd46,Cdc73,Cdh13,Cdh5,Cfh,Cflar,Chd2,Clu,Col18a1,Col1a2,Col2a1,Col3a1,Col4a1,Col4a2,Cop1,Cplane1,Creb1,Crebbp,Crk,Csf3r,Ctdsp2,Ctnnb1,Cxcl12,Daam1,Ddx3x,Dlc1,Dmd,Dock1,Dtna,Dusp3,Dync2h1,Dyrk1a,Ece1,Egln1,Emc8,Enpp1,Entpd1,Entp…
MP:0003743	abnormal facial morphology	3.16e-08	8.26e-06	108	983	Mouse	Acan,Acvr2a,Alkbh1,Alpl,Antxr1,Arhgap29,Atp11a,Bmpr1a,Braf,Brd2,Cdc42,Clcn5,Col11a2,Col27a1,Col2a1,Cplane1,Cramp1l,Creb3l2,Crebbp,Crk,Csf1r,Ctnnb1,Dcn,Dock1,Dst,Dync2h1,Dzip1l,Ece1,Efna5,Ermp1,Evc,Ext1,Eya4,F7,Fgfr1,Fgfrl1,Foxn3,Glg1,Gli3,Golgb1,Grem2,Hipk2,Hspg2,Ift172,Il1r1,Inhba,Irf6,Itgav,Itgb1,Itgb4,Kat6a,Kcnj2,Kmt2a,Kmt2d,Kras,Lama5,Large1,Lima1,Lmna,Lpar1,Lrp6,Ltbp3,Luzp1,Map3k7,Mau2,Mbd5,…
MP:0008762	embryonic lethality	3.17e-08	8.26e-06	224	983	Mouse	Acaca,Actr3,Acvr2a,Aebp2,Aff4,Ago2,Akap13,Ankfy1,Arf1,Arhgap29,Arid2,Arnt,Atad3a,Atp2a2,Atrx,Bcl2l11,Birc6,Bmpr1a,Bmpr2,Bptf,Braf,Brd1,Brd2,Bsg,C1galt1,C1qbp,C2cd3,Cabin1,Cdc42,Cdc73,Cdh5,Cdk12,Cenpo,Cflar,Chd4,Chd8,Cnbp,Col3a1,Col4a1,Cop1,Crebbp,Ctnnb1,Cycs,Daam1,Ddx3x,Dido1,Dlc1,Dnmt1,Dync2h1,Dyrk1a,Ece1,Egln1,Ep400,Epb41l5,Erbb4,Ern1,Exoc8,Ext1,F2r,Fam208a,Fam210a,Fech,Fgd5,Fgfr1,Fgl2,Fh1,Flii…
MP:0010545	abnormal heart layer morphology	3.22e-08	8.26e-06	82	983	Mouse	Akap13,Arid2,Atp11a,Atp2a2,Bmpr2,Braf,Brd2,Btaf1,Cacna1c,Cflar,Chd2,Clu,Col3a1,Crebbp,Ctnnb1,Daam1,Ddx3x,Dmd,Dtna,Egln1,Erbb4,Fgfr1,Fgfrl1,Flrt2,Fn1,Foxo1,Foxp1,Gjc1,Hexim1,Hspb7,Hspg2,Itgav,Itgb1,Kdm4a,Klf3,Kmt2d,Kras,Large1,Ldb3,Lepr,Lmna,Lrp1,Map3k3,Map3k7,Mdm4,Megf8,Mkl2,Myocd,Naca,Nfat5,Ngf,Nipbl,Notch2,Nox4,Nr3c1,Pdha1,Plec,Pmm2,Polg,Por,Ptpn11,Ptprb,Ptprj,Qk,Ryr2,Setd5,Sh3pxd2a,Sh3pxd2b,So…
MP:0001265	decreased body size	3.28e-08	8.26e-06	294	983	Mouse	Abca1,Abl2,Acan,Ace,Acox1,Adgrf5,Aff1,Aff2,Ago1,Ahnak,Alpl,Angptl2,Anxa6,Arhgap23,Arhgap5,Arnt,Ash1l,Atad2b,Atp2a2,Atrx,Atxn1,Atxn1l,Atxn7,B3galt2,Bclaf1,Bcr,Bmpr1a,Braf,Bsg,C1galt1,Cacna1d,Cbfa2t2,Cbl,Cbx5,Ccr2,Cdc42,Cdc73,Cdk6,Cdkal1,Cep63,Cflar,Chd2,Cluh,Col11a2,Col1a2,Col27a1,Col2a1,Col3a1,Col4a1,Col6a3,Cop1,Cpeb4,Crebbp,Crebrf,Crk,Csf1r,Cspg4,Ctnnb1,Cux1,Cycs,Daam1,Dmd,Dnajc10,Dnajc3,Dnmt3a,…
MP:0002086	abnormal extraembryonic tissue morphology	3.69e-08	8.94e-06	106	983	Mouse	Abca1,Adcy9,Ago2,Alkbh1,Arnt,Atad3a,Atp11a,Atrx,Birc6,Bmpr1a,Bmpr2,Bptf,Braf,Brd2,Cdh5,Cdk12,Col27a1,Col4a1,Crebbp,Ctnnb1,Cycs,Ddx3x,Dlc1,Dnmt1,Egln1,Epb41l5,Ern1,Ext1,F2r,Fgfr1,Fgfrl1,Flt1,Fn1,Foxo1,Frs2,Fubp1,Fzd5,Gjc1,Grb10,Hcfc1,Itga4,Itgav,Itgb1,Kras,Krit1,Lama5,Lepr,Lifr,Map3k3,Map3k7,Mecp2,Med28,Mga,Mib1,Mkl2,Myh9,Myocd,N6amt1,Nf2,Notch2,Nsd1,Pam,Pbrm1,Pdgfra,Pkn2,Plcg1,Plk2,Pmm2,Pofut2,Po…
MP:0006208	lethality throughout fetal growth and development	3.91e-08	9.14e-06	72	983	Mouse	Abca1,Birc6,Bmpr2,Braf,Brd1,C1galt1,Cacna1c,Cbl,Cdc42,Cdh5,Chd2,Col4a1,Col4a2,Cop1,Creb1,Crebbp,Crk,Ctnnb1,Cxcl12,Daam1,Ddx3x,Dock1,F2r,Fbxl20,Fgfr1,Fgfrl1,Flrt2,Foxp1,Gabpa,Hexim1,Il6st,Itgb1,Kat6a,Kit,Klf3,Kmt2a,Kras,Lama5,Lrp1,Megf8,Mkl2,Ncor1,Ncor2,Ndst1,Nedd4,Nf2,Nfat5,Pam,Pbrm1,Pbx1,Pcnt,Pdgfra,Picalm,Por,Pou2f1,Ptpn11,Rictor,Ryr2,Sel1l,Senp1,Slk,Sod2,Sptbn1,Srsf10,Stag1,Stx1a,Sufu,Tie1,Tle…
MP:0014134	abnormal embryo morphology	4.54e-08	1.02e-05	182	983	Mouse	Abca1,Acaca,Actr3,Acvr2a,Adcy9,Ago2,Akap13,Alkbh1,Arhgap29,Arnt,Atad3a,Atp11a,Atp2a2,Atrx,Bmpr1a,Bmpr2,Bptf,Braf,Brd1,Brd2,Brwd3,C1qbp,C2cd3,Cacna1c,Cdc42,Cdc73,Cdh5,Cdk12,Chd4,Chd8,Ckap4,Cluh,Cnbp,Col2a1,Col4a2,Crebbp,Ctnnb1,Cycs,Cyp26b1,Daam1,Ddx3x,Dido1,Dlc1,Dnmt1,Dnmt3a,Dyrk1a,Ece1,Efna5,Egln1,Ep400,Epb41l5,Ern1,Exoc8,Ext1,Eya4,F2r,Fat4,Fgfr1,Fn1,Foxo1,Frs2,Gfra1,Gjc1,Gli3,Gpr161,Greb1l,Grem1…
MP:0000454	abnormal jaw morphology	4.88e-08	1.06e-05	73	983	Mouse	Acvr2a,Alkbh1,Alpl,Antxr1,Bmpr1a,Braf,Cdc73,Clcn5,Cnbp,Col2a1,Cplane1,Crebbp,Csf1r,Ctnnb1,Cyp26b1,Dcn,Dock1,Dync2h1,Ece1,Evc,Fgfr1,Fgfrl1,Foxn3,Glg1,Gli3,Grem2,Hipk2,Hspg2,Il1r1,Inhba,Irf6,Itgb1,Kat6a,Kat6b,Kmt2d,Lama5,Lima1,Lmna,Lpar1,Lrp6,Ltbp3,Map3k7,Mau2,Mbtps1,Mecp2,Megf8,Mnt,Ncoa3,Ndst1,Nf2,Nipbl,Notch2,Pfas,Prrx1,Ptpn11,Rhobtb3,Rps6ka3,Setd5,Sh3pxd2b,Slc20a2,Slc38a10,Slc4a4,Smg1,Smoc1,Stag…
MP:0002081	perinatal lethality	5.9e-08	1.24e-05	163	983	Mouse	Abca1,Acan,Acvr2a,Aff4,Ago2,Arhgap5,Arnt,Atp1a2,Atp2a2,Atxn1l,Bahcc1,Birc6,Bmpr1a,Bmpr2,Braf,Brd2,Cacna1c,Cbl,Cdc42,Cluh,Cnbp,Col1a2,Col27a1,Col2a1,Col4a1,Cpeb4,Creb3l2,Creb5,Crebbp,Crk,Ctnnb1,Cux1,Cxcl12,Cycs,Cyp26b1,Daam1,Dgkd,Ece1,Ets1,Evc,Evc2,Ext1,Eya4,F7,Fat1,Fat4,Fgfr1,Fgfrl1,Fndc3b,Foxp1,Fubp1,G3bp1,Gfra1,Gja5,Gli3,Gprc5b,Grb10,Grem1,Gtf2a1,Gucy1b1,Hectd1,Hexim1,Hspg2,Huwe1,Ift172,Igf1,Ig…
MP:0011110	preweaning lethality, incomplete penetrance	6.48e-08	1.32e-05	80	983	Mouse	Acvr2a,Adcy9,Aff1,Ahnak,Arhgef1,Cant1,Cbl,Cbx5,Cdh5,Chd2,Ckap4,Crebbp,Csf3r,Ctdsp2,Ctdspl2,Ctnnb1,Dmd,Dnal4,Dnmt3a,Ecm1,Epb41,Evc2,F7,Flrt2,Fto,Glg1,Hipk2,Hr,Ikzf2,Ino80,Itgb1,Itm2c,Jam3,Kalrn,Kit,Klf3,Lfng,Lima1,Lrrk2,Ltbp3,Mad1l1,Map3k1,Mecp2,Nacc1,Ncoa3,Nfat5,Ntrk2,Ophn1,Pacsin2,Por,Prkab2,Ptp4a2,Ptp4a3,Ptpn14,Rdx,Rhobtb3,Rif1,Rock1,Rora,Setbp1,Sh3pxd2a,Slc20a2,Slc4a7,Smc6,Smoc1,Smurf2,Tcf4,Th…
MP:0002088	abnormal embryonic growth/weight/body size	6.68e-08	1.32e-05	135	983	Mouse	Abca1,Acaca,Acvr2a,Aff4,Ago2,Akap13,Arnt,Atad3a,Atp2a2,Atrx,Bmpr1a,Bmpr2,Bptf,Braf,Brd1,Brd2,Brwd3,Btaf1,C1qbp,Cdc42,Cdc73,Cdh5,Cflar,Ckap4,Cluh,Cnbp,Col2a1,Cplane1,Crebbp,Ctnnb1,Cycs,Daam1,Ddx3x,Dlc1,Dnmt3a,Dyrk1a,Epb41l5,Ern1,Exoc8,Ext1,Eya4,F2r,Fam208a,Fgfr1,Fn1,Foxo1,Frs2,G3bp1,Gjc1,Gli3,Grb10,Greb1l,Hcfc1,Hspg2,Huwe1,Igf1,Il6st,Ino80,Itgav,Itgb1,Kmt2b,Kmt2d,Kras,Krit1,Lama5,Letm1,Lrp1,Lrp6,M…
MP:0012321	abnormal total tissue mass	8.32e-08	1.59e-05	260	983	Mouse	Abca1,Abl2,Acan,Ace,Acox1,Adgrf5,Aff4,Ago1,Ahnak,Alms1,Alpl,Angptl2,Anxa6,Arnt,Ash1l,Atp2a2,Atrx,Atxn1,Atxn1l,Atxn7,B3galt2,Bcr,Bmpr2,Braf,Brd2,Bsg,C1galt1,Cacna1d,Cbl,Ccr2,Cdc73,Cdk6,Cdkal1,Cep63,Chd2,Clock,Cluh,Col1a2,Col27a1,Col2a1,Col4a1,Col6a3,Cop1,Cpe,Cpeb4,Crebbp,Crebrf,Crk,Crtc1,Csf1r,Cspg4,Cux1,Cycs,Dmd,Dnajc10,Dnajc3,Dnmt3a,Dse,Dst,Dyrk1a,Egln1,Elk4,Eml1,Enpp1,Entpd5,Ercc4,Ercc6,Ereg,Et…
MP:0001259	abnormal body weight	8.56e-08	1.59e-05	275	983	Mouse	Abca1,Abl2,Acan,Ace,Acot11,Acox1,Adgrf5,Adipor1,Adrb3,Aff4,Ago1,Ahnak,Alms1,Alpl,Angptl2,Anxa6,Arnt,Ash1l,Atp2a2,Atp8b1,Atrx,Atxn1,Atxn1l,Atxn7,B3galt2,Bcr,Bmpr2,Braf,Brd2,Bsg,C1galt1,Cacna1d,Cbl,Ccr2,Cdc73,Cdk6,Cdkal1,Cep63,Chd2,Clock,Cluh,Col1a2,Col27a1,Col2a1,Col4a1,Col6a3,Cop1,Cpe,Cpeb4,Crebbp,Crebrf,Crk,Crtc1,Csf1r,Cspg4,Cux1,Cycs,Dmd,Dnajc10,Dnajc3,Dnmt3a,Dse,Dst,Dyrk1a,Egln1,Elk4,Eml1,Enpp…
MP:0002128	abnormal blood circulation	9.31e-08	1.68e-05	110	983	Mouse	Abca1,Adcy9,Agtrap,Alkbh1,Alpl,Arid2,Ash1l,Atp2a2,Birc6,Bmpr1a,Bmpr2,Braf,Brd2,Btaf1,C1galt1,Cacna1c,Ccr2,Cdc42,Cflar,Chd2,Col18a1,Col1a2,Col2a1,Col4a1,Col4a2,Crebbp,Crk,Ctnnb1,Cxcl12,Cycs,Cyp26b1,Daam1,Ddx3x,Dmd,Egln1,Entpd1,Erbb4,F2r,F7,Fgl2,Flrt2,Flt1,Fn1,Foxp1,Fubp1,Fzd5,G3bp1,Gjc1,Gli3,Hspg2,Ift172,Ikbkg,Il6st,Itga4,Itgav,Itgb1,Jam3,Kat6a,Klf3,Kmt2a,Kras,Krit1,Lepr,Lmf1,Lpar1,Lrp1,Lyz2,Map3k…
MP:0003984	embryonic growth retardation	1.01e-07	1.76e-05	86	983	Mouse	Abca1,Acaca,Aff4,Ago2,Akap13,Arnt,Atad3a,Atrx,Bmpr2,Bptf,Braf,Brd1,Brd2,Brwd3,Btaf1,C1qbp,Cdh5,Cflar,Cplane1,Crebbp,Ctnnb1,Cycs,Ddx3x,Dlc1,Dyrk1a,Ern1,F2r,Fam208a,Fgfr1,Fn1,Foxo1,Frs2,G3bp1,Gjc1,Gli3,Grb10,Huwe1,Ino80,Itgav,Itgb1,Kmt2b,Kmt2d,Kras,Krit1,Letm1,Lrp1,Map3k20,Mib1,Myh9,Myocd,Naca,Notch2,Pdgfra,Pdha1,Pex5,Plcg1,Plk2,Pmm2,Polg,Por,Ptpn11,Ptprb,Ptprj,Qk,Rad54l2,Rest,Rictor,Rif1,Rtel1,Ryr…
MP:0001914	hemorrhage	1.4e-07	2.39e-05	92	983	Mouse	Abca1,Adcy9,Alkbh1,Alpl,Arid2,Birc6,Bmpr1a,Braf,Brd2,C1galt1,Cacna1c,Ccr2,Cdc42,Cflar,Chd2,Col18a1,Col1a2,Col2a1,Col4a1,Col4a2,Crebbp,Crk,Ctnnb1,Cxcl12,Cycs,Cyp26b1,Ddx3x,Egln1,F2r,F7,Fgl2,Flrt2,Fn1,Foxp1,Fubp1,Fzd5,G3bp1,Gli3,Hspg2,Ift172,Ikbkg,Il6st,Itga4,Itgav,Itgb1,Jam3,Kat6a,Klf3,Kmt2a,Kras,Lmf1,Lpar1,Lrp1,Lyz2,Map3k7,Megf8,Mkl2,Naca,Nedd4,Notch2,Pcnt,Pdgfa,Pdgfra,Pkn2,Plec,Pmm2,Por,Ptpn11,R…
MP:0003935	abnormal craniofacial development	1.47e-07	2.44e-05	64	983	Mouse	Akap13,Alkbh1,Alpl,Antxr1,Arhgap29,Atp11a,Bmpr1a,Cdc42,Cdh5,Clcn5,Col2a1,Crk,Ctnnb1,Dlc1,Ece1,Fgfr1,Foxn3,Foxo1,Frs2,Gli3,Golgb1,Hectd1,Irf6,Itgav,Itgb1,Kat6a,Kcnj2,Krit1,Lama5,Lrp6,Ltbp3,Luzp1,Map3k7,Mau2,Med12,Mib1,Mkl2,Mnt,Ncor2,Nf2,Nipbl,Pbx1,Pcnt,Pdgfra,Pkn2,Por,Prrx1,Ptpn11,Rad17,Rere,Rps6ka3,Rpsa,Setd2,Sh3pxd2a,Smad5,Smg1,Sox5,Stag1,Traf6,Tshz1,Twsg1,Ubr5,Zeb1,Zeb2
MP:0005329	abnormal myocardium layer morphology	1.54e-07	2.49e-05	79	983	Mouse	Akap13,Arid2,Atp11a,Atp2a2,Bmpr2,Braf,Brd2,Btaf1,Cacna1c,Cflar,Chd2,Clu,Crebbp,Daam1,Ddx3x,Dmd,Dtna,Egln1,Erbb4,Fgfr1,Fgfrl1,Flrt2,Fn1,Foxo1,Foxp1,Gjc1,Hexim1,Hspb7,Hspg2,Itgav,Itgb1,Kdm4a,Klf3,Kmt2d,Kras,Large1,Ldb3,Lepr,Lmna,Lrp1,Map3k3,Map3k7,Mdm4,Megf8,Mkl2,Myocd,Naca,Nfat5,Ngf,Nipbl,Notch2,Nox4,Nr3c1,Pdha1,Plec,Pmm2,Polg,Por,Ptpn11,Ptprb,Ptprj,Qk,Ryr2,Setd5,Sh3pxd2a,Sh3pxd2b,Sod2,Sptb,Sptbn1…
MP:0001784	abnormal fluid regulation	1.8e-07	2.84e-05	116	983	Mouse	Acan,Adcy6,Adcy9,Ago2,Akap13,Angpt2,Arid2,Arnt,Atp11a,Atp2a2,Bcr,Birc6,Bmpr1a,Braf,Brd2,Btaf1,C2cd3,Ccbe1,Cd2ap,Cdc42,Cdc73,Cdh5,Cfh,Cflar,Chd2,Clu,Col4a2,Cop1,Cplane1,Crk,Ctnnb1,Cyp26b1,Daam1,Ddx3x,Dock1,Ece1,Eya4,F2r,Flrt2,Foxo1,Foxp1,Gjc1,Gli3,Hpgds,Hspg2,Ift172,Igf1r,Itga3,Itgav,Itgb1,Itgb4,Kat6a,Kcnj2,Kmt2a,Kmt2b,Kmt2d,Kras,Lama5,Lmna,Map3k20,Map3k7,Mdm4,Megf8,Mib1,Mkl2,Myocd,Naca,Ncor1,Nfat…
MP:0005274	abnormal viscerocranium morphology	1.93e-07	2.97e-05	79	983	Mouse	Acvr2a,Alkbh1,Alpl,Antxr1,Bmpr1a,Braf,Cdc73,Clcn5,Cnbp,Col11a2,Col2a1,Cplane1,Crebbp,Csf1r,Ctnnb1,Cyp26b1,Dcn,Dock1,Dync2h1,Ece1,Evc,Fgfr1,Fgfrl1,Foxn3,Glg1,Gli3,Grem2,Hectd1,Hipk2,Hspg2,Il1r1,Inhba,Irf6,Itgb1,Kat6a,Kat6b,Kmt2d,Lama5,Lima1,Lmna,Lpar1,Lrp6,Ltbp3,Map3k7,Mau2,Mbd5,Mbtps1,Mecp2,Megf8,Mnt,Ncoa3,Ndst1,Nf2,Nipbl,Notch2,Pbx1,Pdgfra,Pfas,Prrx1,Ptpn11,Rhobtb3,Rps6ka3,Setd5,Sh3pxd2a,Sh3pxd2…
MP:0005385	cardiovascular system phenotype	2.33e-07	3.5e-05	324	983	Mouse	Abca1,Abhd2,Acan,Ace,Adcy6,Adcy9,Ago2,Agtrap,Akap13,Alkbh1,Alpl,Angpt2,Anpep,Antxr1,Anxa6,Ap3s1,Arhgef1,Arhgef12,Arid2,Arnt,Arrb1,Ash1l,Atp11a,Atp1a2,Atp2a2,Atrx,Axl,Bcl2l11,Birc6,Bmpr1a,Bmpr2,Braf,Brd2,Btaf1,C1galt1,C2cd3,C4b,Cacna1c,Cacna1d,Cacna2d1,Camk2d,Cant1,Ccr2,Cd2ap,Cd46,Cdc42,Cdc73,Cdh13,Cdh5,Cfh,Cflar,Chd2,Clock,Clu,Col18a1,Col1a2,Col2a1,Col3a1,Col4a1,Col4a2,Cop1,Cplane1,Creb1,Crebbp,C…
MP:0005369	muscle phenotype	2.4e-07	3.51e-05	192	983	Mouse	Abca1,Acan,Adcy6,Adipor1,Akap13,Alpl,Angptl2,Anxa6,Arhgef1,Arhgef12,Arid2,Arrb1,Atp11a,Atp1a2,Atp2a2,Atxn1,Atxn7,Bmpr1a,Bmpr2,Braf,Brd2,Btaf1,Cacna1c,Cacna2d1,Camk2d,Cbl,Cdc42,Cdc73,Cflar,Chd2,Clu,Col1a2,Col3a1,Col4a1,Col4a2,Col6a3,Cpe,Cpeb4,Creb1,Crebbp,Crk,Ctnnb1,Cxcl12,Daam1,Dcn,Ddx3x,Dmd,Dnmt3a,Dock1,Dock5,Dst,Dtna,Ece1,Egln1,Eml1,Enpp1,Entpd1,Erbb4,Fat1,Fgf2,Fgfr1,Fgfrl1,Fn1,Foxo1,Foxp1,Gabp…
MP:0005451	abnormal body composition	2.67e-07	3.83e-05	282	983	Mouse	Abca1,Abl2,Acan,Ace,Acot11,Acox1,Adgrf5,Aff4,Ago1,Ahcyl1,Ahnak,Alms1,Alpl,Angptl2,Anxa6,Arnt,Ash1l,Atp2a2,Atrx,Atxn1,Atxn1l,Atxn7,B3galt2,Bcr,Bmpr2,Braf,Brd2,Bsg,C1galt1,C3ar1,Cacna1d,Cbl,Ccr2,Cdc73,Cdk6,Cdkal1,Cep63,Chd2,Chd4,Clock,Cluh,Col1a2,Col27a1,Col2a1,Col4a1,Col6a3,Cop1,Cpe,Cpeb4,Crebbp,Crebrf,Crk,Crtc1,Csf1r,Cspg4,Ctdspl2,Cux1,Cycs,Dmd,Dnajc10,Dnajc3,Dnmt3a,Dse,Dst,Dusp3,Dyrk1a,Egln1,Elk…
MP:0001672	abnormal embryo development	3.1e-07	4.35e-05	138	983	Mouse	Abca1,Acaca,Actr3,Acvr2a,Aff4,Ago2,Akap13,Arnt,Atad3a,Atrx,Bmpr1a,Bmpr2,Bptf,Braf,Brd1,Brd2,Brwd3,Btaf1,C1qbp,C2cd3,Cdh5,Cflar,Chd8,Cnbp,Col2a1,Cox7b,Cplane1,Crebbp,Ctnnb1,Cycs,Cyp26b1,Ddx3x,Dido1,Dlc1,Dlg3,Dnmt1,Dync2h1,Dyrk1a,Ep400,Epb41l5,Ern1,Ext1,F2r,Fam208a,Fgfr1,Flii,Flt1,Fn1,Foxo1,Frs2,G3bp1,Gjc1,Gli3,Gpr161,Grb10,Huwe1,Ift172,Ino80,Itgav,Itgb1,Kdm5c,Kmt2a,Kmt2b,Kmt2d,Kras,Krit1,Letm1,Lfn…
MP:0001544	abnormal cardiovascular system physiology	5.07e-07	6.95e-05	211	983	Mouse	Abca1,Abhd2,Acan,Ace,Adcy6,Adcy9,Agtrap,Akap13,Alkbh1,Alpl,Angpt2,Anpep,Anxa6,Ap3s1,Arhgef1,Arhgef12,Arid2,Arrb1,Ash1l,Atp1a2,Atp2a2,Axl,Bcl2l11,Birc6,Bmpr1a,Bmpr2,Braf,Brd2,Btaf1,C1galt1,C4b,Cacna1c,Cacna1d,Cacna2d1,Camk2d,Ccr2,Cd46,Cdc42,Cdh13,Cdh5,Cflar,Chd2,Clock,Clu,Col18a1,Col1a2,Col2a1,Col3a1,Col4a1,Col4a2,Cplane1,Crebbp,Crk,Ctnnb1,Cxcl12,Cycs,Cyp26b1,Daam1,Ddx3x,Dmd,Dtna,Ece1,Egln1,Entpd1…
MP:0004056	abnormal myocardium compact layer morphology	5.79e-07	7.76e-05	21	983	Mouse	Arid2,Atp11a,Atp2a2,Bmpr2,Braf,Brd2,Crebbp,Daam1,Egln1,Flrt2,Foxp1,Hexim1,Hspg2,Kmt2d,Map3k7,Nfat5,Nipbl,Ptpn11,Sptbn1,Traf6,Vcam1
MP:0013662	decreased myeloid cell number	7.74e-07	0.000102	64	983	Mouse	Abca1,Ago2,Arnt,Arrb1,Bcl2l11,Braf,Brd1,C1galt1,Ccbe1,Cdc42,Cdk6,Cfh,Chd2,Col4a1,Col4a2,Cpeb4,Egln1,Elk4,Entpd1,Ep400,Fam53b,Fancc,Fech,Fgfrl1,Foxo3,Il6st,Irf2bp2,Kit,Klf13,Klf3,Kmt2a,Kras,Lamc3,Lcn2,Lepr,Msi2,Mtus1,Myh9,Mysm1,Ncoa3,Ncor1,Nxpe5,Osmr,Pbx1,Picalm,Polg,Ppp1r15b,Prkdc,Pttg1,Ric1,Rpl27a,Senp1,Slc38a10,Smoc1,Smurf2,Sptb,Tet2,Tln1,Tmod3,Tnrc6a,Ttc28,Twsg1,Uevld,Usp42
MP:0002116	abnormal craniofacial bone morphology	9.02e-07	0.000116	102	983	Mouse	Acan,Acvr2a,Adcy9,Alkbh1,Alpl,Antxr1,Atxn1l,Bmpr1a,Braf,Brd2,Cdc42,Cdc73,Chsy1,Clcn5,Cnbp,Col11a2,Col18a1,Col27a1,Col2a1,Cplane1,Creb3l2,Crebbp,Csf1r,Ctnnb1,Cycs,Cyp26b1,Dcn,Dock1,Dync2h1,Ece1,Eml1,Evc,Evc2,Ext1,Fgfr1,Fgfrl1,Foxn3,Glg1,Gli3,Grem2,Hectd1,Hipk2,Hspg2,Il1r1,Inhba,Irf6,Itgb1,Jam3,Kat6a,Kat6b,Kmt2d,Kras,Lama5,Lima1,Lmna,Lpar1,Lrp6,Ltbp3,Map3k7,Marcks,Mau2,Mbd5,Mbtps1,Mecp2,Med12,Megf8…
MP:0000438	abnormal cranium morphology	1.26e-06	0.000159	99	983	Mouse	Acvr2a,Adcy9,Alkbh1,Alpl,Antxr1,Atxn1l,Bmpr1a,Braf,Brd2,Cdc42,Cdc73,Clcn5,Cnbp,Col11a2,Col18a1,Col27a1,Col2a1,Cplane1,Crebbp,Csf1r,Ctnnb1,Cycs,Cyp26b1,Dcn,Dock1,Dync2h1,Ece1,Eml1,Evc,Evc2,Ext1,Fgfr1,Fgfrl1,Foxn3,Glg1,Gli3,Grem2,Hectd1,Hipk2,Hspg2,Il1r1,Inhba,Irf6,Itgb1,Jam3,Kat6a,Kat6b,Kmt2d,Kras,Lama5,Lima1,Lmna,Lpar1,Lrp6,Ltbp3,Map3k7,Marcks,Mau2,Mbd5,Mbtps1,Mecp2,Med12,Megf8,Mnt,Ncoa3,Ndst1,Nf…
MP:0002875	decreased erythrocyte cell number	1.42e-06	0.000175	44	983	Mouse	Ago2,Arnt,Braf,Ccbe1,Cdk6,Chd2,Col4a1,Col4a2,Cpeb4,Elk4,Ep400,Fam53b,Fech,Fgfrl1,Foxo3,Irf2bp2,Kit,Klf13,Klf3,Kmt2a,Msi2,Mtus1,Mysm1,Ncor1,Nxpe5,Osmr,Pbx1,Picalm,Polg,Ppp1r15b,Prkdc,Ric1,Rpl27a,Senp1,Slc38a10,Smoc1,Sptb,Tet2,Tln1,Tmod3,Tnrc6a,Ttc28,Twsg1,Uevld
MP:0005331	insulin resistance	1.47e-06	0.000175	39	983	Mouse	Adipor1,Alms1,Angptl2,Cd38,Clock,Cpe,Crebbp,Cspg4,Foxo1,Gpam,Grb10,Il1r1,Insr,Kmt2b,Lcn2,Lepr,Lmna,Lnpep,Lrp6,Mgat4a,Ncoa3,Ncor2,Osmr,Pde3b,Prex2,Prkab2,Ptcd1,Ptpn11,Rictor,Rock1,Rps6ka3,Senp1,Steap4,Tbl1xr1,Thra,Trp53inp1,Tusc5,Wrn,Zeb1
MP:0010866	abnormal prenatal body size	1.47e-06	0.000175	119	983	Mouse	Abca1,Acaca,Acvr2a,Alkbh1,Arnt,Atp2a2,Atrx,Birc6,Bmpr1a,Bptf,Braf,Brd2,C1qbp,Cbfa2t2,Cdc42,Cdc73,Chd2,Ckap4,Cluh,Cnbp,Col27a1,Col2a1,Creb1,Crebbp,Ctnnb1,Cycs,Daam1,Dgkd,Dnmt3a,Dyrk1a,Epb41l5,Ern1,Exoc8,Ext1,Eya4,F2r,Fgfr1,Fn1,Frs2,Fubp1,Gabpa,Gjc1,Glg1,Gli3,Grb10,Greb1l,Hcfc1,Hspg2,Huwe1,Il6st,Itgb1,Kat6a,Kit,Kras,Krit1,Lama5,Letm1,Lifr,Lrp1,Lrp6,Maea,Map3k7,Mcm9,Mdm4,Mnt,Myh9,N6amt1,Ncoa3,Ncor1,…
MP:0002100	abnormal tooth morphology	1.58e-06	0.000184	41	983	Mouse	Acvr2a,Alkbh1,Alpl,Antxr1,Bmpr1a,Braf,Clcn5,Crebbp,Csf1r,Ctnnb1,Dcn,Evc,Fgfr1,Gli3,Grem2,Hipk2,Il1r1,Inhba,Irf6,Lama5,Lima1,Lmna,Lpar1,Lrp6,Ltbp3,Mecp2,Ncoa3,Nf2,Notch2,Rhobtb3,Rps6ka3,Setd5,Sh3pxd2b,Slc20a2,Slc4a4,Smg1,Stag1,Tnfrsf11a,Traf6,Trps1,Zzef1
MP:0000267	abnormal heart development	1.75e-06	0.000201	62	983	Mouse	Akap13,Bmpr1a,Braf,C2cd3,Cdh5,Cflar,Col4a2,Cop1,Crebbp,Daam1,Dlc1,Dync2h1,Ece1,Egln1,Epb41l5,Erbb4,F2r,Fgfr1,Flt1,Fn1,Foxo1,Foxp1,Gja5,Gjc1,Greb1l,Hexim1,Hspb7,Hspg2,Ift172,Il6st,Klf3,Kmt2b,Kmt2d,Kras,Krit1,Lmna,Map3k3,Mdm4,Med12,Megf8,Mib1,Ncor2,Pdgfra,Pkn2,Ptpn11,Ptprb,Ptprj,Qk,Rere,Rfx3,Rttn,Ryr2,Sh3pxd2a,Slc20a2,Smad5,Smg1,Sptbn1,Ssr1,Sufu,Sumo2,Xbp1,Zfp568
MP:0013658	abnormal myeloid cell morphology	2.2e-06	0.000248	221	983	Mouse	Abca1,Abcd2,Abraxas2,Acbd5,Ace,Adgrf5,Ago2,Ahcyl1,Arf2,Arhgef1,Arhgef5,Arnt,Arrb1,Atp11a,Atp2a2,Bcl2l11,Bcr,Bmpr1a,Bnip2,Braf,Brd1,C1galt1,C3ar1,C4b,Cbl,Ccbe1,Ccl11,Ccr2,Cd200,Cd300a,Cdc42,Cdh5,Cdk6,Cfh,Cflar,Chd2,Chsy1,Cmklr1,Col4a1,Col4a2,Cpeb4,Crebbp,Csf1r,Csf3r,Ctnnb1,Cx3cl1,Cxcl12,Cyb5d1,Dclre1c,Dido1,Dlg3,Dnajc10,Dusp3,Ecm1,Egln1,Eif2ak2,Elk4,Entpd1,Entpd5,Ep400,Epb41,Epb41l5,Ercc6,Fam110b,…
MP:0013661	abnormal myeloid cell number	2.34e-06	0.000258	82	983	Mouse	Abca1,Abraxas2,Ago2,Arnt,Arrb1,Bcl2l11,Braf,Brd1,C1galt1,Cbl,Ccbe1,Cdc42,Cdk6,Cfh,Cflar,Chd2,Col4a1,Col4a2,Cpeb4,Dido1,Egln1,Elk4,Entpd1,Ep400,Epb41,Fam110b,Fam53b,Fancc,Fech,Fgf2,Fgfrl1,Foxo3,Glg1,Il6st,Irf2bp2,Kit,Klf13,Klf3,Kmt2a,Kras,Lamc3,Lcn2,Lepr,Lrba,Mdm4,Msi2,Mtus1,Myh9,Mysm1,Ncoa3,Ncor1,Nxpe5,Osmr,Pbx1,Picalm,Polg,Ppp1r15b,Prkdc,Ptpn11,Pttg1,Raph1,Ric1,Rpl27a,Senp1,Sesn1,Slc38a10,Slc4a4…
MP:0001262	decreased body weight	2.79e-06	0.000298	229	983	Mouse	Abca1,Abl2,Ace,Acox1,Adgrf5,Ago1,Ahnak,Alpl,Angptl2,Anxa6,Arnt,Ash1l,Atp2a2,Atrx,Atxn1,Atxn1l,Atxn7,B3galt2,Bcr,Braf,Bsg,C1galt1,Cacna1d,Cbl,Ccr2,Cdc73,Cdk6,Cdkal1,Cep63,Chd2,Cluh,Col1a2,Col27a1,Col2a1,Col4a1,Col6a3,Cop1,Cpeb4,Crebbp,Crebrf,Crk,Csf1r,Cspg4,Cux1,Cycs,Dmd,Dnajc10,Dnajc3,Dnmt3a,Dse,Dst,Dyrk1a,Egln1,Elk4,Eml1,Enpp1,Entpd5,Ercc4,Ercc6,Ereg,Ets1,Evc2,Eya4,Faf2,Fam210a,Fat1,Fgf14,Foxn3,…
MP:0012322	decreased total tissue mass	2.79e-06	0.000298	229	983	Mouse	Abca1,Abl2,Ace,Acox1,Adgrf5,Ago1,Ahnak,Alpl,Angptl2,Anxa6,Arnt,Ash1l,Atp2a2,Atrx,Atxn1,Atxn1l,Atxn7,B3galt2,Bcr,Braf,Bsg,C1galt1,Cacna1d,Cbl,Ccr2,Cdc73,Cdk6,Cdkal1,Cep63,Chd2,Cluh,Col1a2,Col27a1,Col2a1,Col4a1,Col6a3,Cop1,Cpeb4,Crebbp,Crebrf,Crk,Csf1r,Cspg4,Cux1,Cycs,Dmd,Dnajc10,Dnajc3,Dnmt3a,Dse,Dst,Dyrk1a,Egln1,Elk4,Eml1,Enpp1,Entpd5,Ercc4,Ercc6,Ereg,Ets1,Evc2,Eya4,Faf2,Fam210a,Fat1,Fgf14,Foxn3,…
MP:0001711	abnormal placenta morphology	3.27e-06	0.000344	59	983	Mouse	Abca1,Ago2,Alkbh1,Arnt,Atad3a,Atrx,Birc6,Bptf,Braf,Cdh5,Cdk12,Ctnnb1,Ddx3x,Dlc1,Egln1,Ern1,Fgfrl1,Fn1,Frs2,Fubp1,Fzd5,Gjc1,Grb10,Itga4,Itgav,Itgb1,Kras,Lama5,Lepr,Lifr,Map3k3,Mecp2,Mga,Myh9,N6amt1,Nf2,Notch2,Pbrm1,Pdgfra,Plk2,Pmm2,Pou2f1,Ptp4a2,Rictor,Rock2,Rtel1,Sdc4,Senp1,Setd2,Slk,Smchd1,Ssr3,Sufu,Tjp1,Tle3,Tln1,Trrap,Wnk1,Zfp568
MP:0001586	abnormal erythrocyte cell number	3.92e-06	0.000405	52	983	Mouse	Ago2,Arnt,Braf,Ccbe1,Cdk6,Chd2,Col4a1,Col4a2,Cpeb4,Dido1,Egln1,Elk4,Ep400,Fam110b,Fam53b,Fech,Fgfrl1,Foxo3,Glg1,Irf2bp2,Kit,Klf13,Klf3,Kmt2a,Lcn2,Mdm4,Msi2,Mtus1,Mysm1,Ncor1,Nxpe5,Osmr,Pbx1,Picalm,Polg,Ppp1r15b,Prkdc,Ric1,Rpl27a,Senp1,Slc38a10,Smoc1,Sptb,Tent5c,Tet2,Tln1,Tmod3,Tnrc6a,Tppp,Ttc28,Twsg1,Uevld
MP:0009542	decreased thymocyte apoptosis	4.05e-06	0.000412	9	983	Mouse	Bcl2l11,Cdk6,Ets1,Foxo1,Klf13,Lcn2,Mdm4,Nr3c1,Prkdc
MP:0005294	abnormal heart ventricle morphology	4.11e-06	0.000412	109	983	Mouse	Abca1,Adcy9,Arid2,Atp11a,Atp2a2,Bmpr1a,Bmpr2,Braf,Brd2,Cacna1c,Clu,Col1a2,Col4a2,Cplane1,Crebbp,Crk,Cxcl12,Daam1,Ddx3x,Dlc1,Dmd,Dock1,Ece1,Egln1,Erbb4,F2r,Fgfr1,Fgfrl1,Flrt2,Foxp1,Frs2,Gja5,Gjc1,Greb1l,Gucy1a1,Hectd1,Hexim1,Hspb7,Hspg2,Ift172,Il6st,Itgav,Itgb1,Kat6a,Kdm4a,Klf3,Kmt2d,Kras,Lama5,Ldb3,Lepr,Lmna,Lrp1,Luzp1,Map3k1,Map3k3,Map3k7,Mdm4,Mef2a,Megf8,Mkl2,Myocd,Naca,Ncor1,Ncor2,Ndst1,Nfat5,…
MP:0009258	abnormal thymocyte apoptosis	4.63e-06	0.000456	17	983	Mouse	Bcl2l11,Birc6,Braf,Cdk6,Cflar,Ets1,Foxo1,Il15ra,Klf13,Lcn2,Map3k7,Mdm4,Nr3c1,Prkdc,Ripk1,Rps27l,Twsg1
MP:0005397	hematopoietic system phenotype	5.41e-06	0.000524	393	983	Mouse	Abca1,Abcc1,Abcd2,Abraxas2,Abtb2,Acaca,Acbd5,Ace,Adcy9,Adgrf5,Aff1,Aff4,Ago2,Ahcyl1,Ahnak,Akap13,Alpl,Angptl2,Anpep,Arap2,Arf2,Arhgap5,Arhgef1,Arhgef12,Arhgef2,Arhgef5,Arnt,Arrb1,Ash1l,Atp11a,Atp2a2,Bcl2l11,Bclaf1,Bcr,Birc6,Bmpr1a,Bmpr2,Bnip2,Braf,Brd1,Brd2,Bsg,C1galt1,C1qbp,C3ar1,C4b,Cabin1,Cbl,Cbx5,Ccbe1,Ccl11,Ccl25,Ccr2,Cd200,Cd244a,Cd2ap,Cd300a,Cd300c2,Cd38,Cd5l,Cd93,Cdc42,Cdc73,Cdh5,Cdk6,Cdk…
MP:0011109	lethality throughout fetal growth and development, incomplete penetrance	5.58e-06	0.000526	40	983	Mouse	Abca1,Birc6,Braf,Cacna1c,Cbl,Chd2,Cop1,Creb1,Crebbp,Crk,Ctnnb1,Cxcl12,Daam1,Ddx3x,Dock1,F2r,Fbxl20,Fgfr1,Fgfrl1,Flrt2,Foxp1,Hexim1,Klf3,Lrp1,Mkl2,Ndst1,Nedd4,Nf2,Nfat5,Pdgfra,Por,Rictor,Ryr2,Senp1,Sod2,Srsf10,Stx1a,Tle3,Trio,Uggt1
MP:0000313	abnormal cell death	5.59e-06	0.000526	178	983	Mouse	Alkbh5,Alms1,Angpt2,Antxr1,Arnt,Atf6,Bcl2l11,Birc6,Bmpr1a,Braf,Brd1,Brd2,C1qa,Cacfd1,Cacna1c,Camk2d,Cbx7,Ccbe1,Ccni,Ccr2,Cd200,Cd38,Cdc42,Cdc73,Cdh5,Cdk12,Cdk6,Cep63,Cflar,Chd2,Chd4,Chd8,Clock,Cluh,Cnbp,Col2a1,Crebbp,Ctnnb1,Cx3cl1,Cxcl12,Cycs,Cyp26b1,Dab2ip,Dclre1c,Dcn,Ddx3x,Ddx5,Dido1,Dnmt1,Dyrk1a,Egln1,Ehd4,Eif2ak2,Eml1,Entpd5,Ercc6,Ern1,Ets1,F2r,Fancc,Fat4,Fgf2,Fgfrl1,Fn1,Foxo1,Foxo3,Foxp1,Fry…
MP:0006042	increased apoptosis	5.92e-06	0.000549	115	983	Mouse	Alms1,Arnt,Bcl2l11,Birc6,Bmpr1a,Braf,Brd1,Brd2,C1qa,Cacfd1,Ccbe1,Ccni,Ccr2,Cd200,Cd38,Cdc42,Cdc73,Cdh5,Cdk12,Cdk6,Cep63,Cflar,Chd4,Chd8,Cluh,Col2a1,Ctnnb1,Cx3cl1,Cxcl12,Dcn,Ddx3x,Dido1,Dnmt1,Dyrk1a,Ehd4,Eml1,Entpd5,Ern1,Ets1,Fat4,Fgf2,Fgfrl1,Fn1,Foxp1,Fryl,G3bp1,Gins4,Gjc1,Grem1,Hcfc1,Huwe1,Hyou1,Igf1,Ikbkg,Il15ra,Itga1,Itgb1,Kmt2b,Kras,Lama5,Lamp2,Lepr,Lin7c,Lrrk2,Luzp1,Map3k1,Map3k7,Mdm4,Mecp2,…
MP:0000060	delayed bone ossification	6.19e-06	0.000566	30	983	Mouse	Alkbh1,Bmpr1a,Bmpr2,Col2a1,Crebbp,Csf1r,Ctnnb1,Evc,Fgfrl1,Foxn3,Hspg2,Igf1,Igf1r,Irf6,Kat6b,Lrp6,Megf8,Ndst1,Nfix,Nipbl,Pappa,Plk2,Prrx1,Sfrp2,Slc26a2,Stag1,Thra,Trps1,Twsg1,Zeb1
MP:0000023	abnormal ear position	6.76e-06	0.000609	13	983	Mouse	Fgfr1,Gli3,Itgb1,Kat6b,Kras,Lama5,Lmna,Mau2,Ncoa3,Ndst1,Nipbl,Prrx1,Twsg1
MP:0013656	abnormal hematopoietic cell morphology	6.93e-06	0.000616	309	983	Mouse	Abca1,Abcd2,Abraxas2,Abtb2,Acaca,Acbd5,Ace,Adgrf5,Aff1,Ago2,Ahcyl1,Akap13,Alpl,Anpep,Arap2,Arf2,Arhgef1,Arhgef5,Arnt,Arrb1,Atp11a,Atp2a2,Bcl2l11,Bclaf1,Bcr,Birc6,Bmpr1a,Bnip2,Braf,Brd1,Bsg,C1galt1,C3ar1,C4b,Cbl,Ccbe1,Ccl11,Ccl25,Ccr2,Cd200,Cd300a,Cd5l,Cdc42,Cdh5,Cdk6,Cdkal1,Cfh,Cflar,Chd2,Chd4,Chd9,Chsy1,Cmklr1,Col4a1,Col4a2,Cpeb4,Crebbp,Csf1r,Csf3r,Ctnnb1,Cux1,Cx3cl1,Cxcl12,Cyb5d1,Cycs,Dclre1c,D…
MP:0005387	immune system phenotype	7.19e-06	0.00063	406	983	Mouse	Abca1,Abcc1,Abcd2,Abraxas2,Abtb2,Acaca,Acan,Acbd5,Ace,Acot11,Acox1,Adamts5,Adcy9,Adgrf5,Aff1,Ago2,Ahnak,Akap13,Alms1,Alpl,Angpt2,Angptl2,Anpep,Antxr1,Anxa6,Arap2,Arhgap5,Arhgef1,Arhgef12,Arhgef2,Arhgef5,Arid2,Arnt,Ash1l,Atp11a,Atp2a2,Bcl2l11,Bclaf1,Bcr,Birc6,Bmpr1a,Bmpr2,Bnip2,Braf,Brd2,Bsg,C1galt1,C1qa,C3ar1,C4b,Cabin1,Cacna1c,Cant1,Cbfa2t2,Cbl,Cbx5,Ccbe1,Ccl11,Ccl25,Ccr2,Cd200,Cd244a,Cd2ap,Cd30…
MP:0004197	abnormal fetal growth/weight/body size	9.41e-06	0.000812	49	983	Mouse	Alkbh1,Birc6,Brd2,Cbfa2t2,Chd2,Col27a1,Col2a1,Creb1,Daam1,Dgkd,Fgfrl1,Frs2,Fubp1,Gabpa,Glg1,Grb10,Igf1,Itgb1,Kat6a,Kit,Kras,Lama5,Lifr,Maea,Mnt,Nedd4,Nipbl,Pdgfa,Pdgfra,Picalm,Plk2,Polr2a,Ptges3,Ptp4a2,Ptpn11,Rpsa,Ryr2,Senp1,Setd5,Sh3pxd2a,Smc6,Sod2,Srsf10,Ssr1,Ssr3,Stag1,Stx1a,Trip11,Zeb1
MP:0012556	increased cell death	9.74e-06	0.000821	115	983	Mouse	Alms1,Arnt,Bcl2l11,Birc6,Bmpr1a,Braf,Brd1,Brd2,C1qa,Cacfd1,Ccbe1,Ccni,Ccr2,Cd200,Cd38,Cdc42,Cdc73,Cdh5,Cdk12,Cdk6,Cep63,Cflar,Chd4,Chd8,Cluh,Col2a1,Ctnnb1,Cx3cl1,Cxcl12,Dcn,Ddx3x,Dido1,Dnmt1,Dyrk1a,Ehd4,Eml1,Entpd5,Ern1,Ets1,Fat4,Fgf2,Fgfrl1,Fn1,Foxp1,Fryl,G3bp1,Gins4,Gjc1,Grem1,Hcfc1,Huwe1,Hyou1,Igf1,Ikbkg,Il15ra,Itga1,Itgb1,Kmt2b,Kras,Lama5,Lamp2,Lepr,Lin7c,Lrrk2,Luzp1,Map3k1,Map3k7,Mdm4,Mecp2,…
MP:0000111	cleft palate	9.76e-06	0.000821	48	983	Mouse	Acan,Acvr2a,Arhgap29,Bmpr1a,Cdc42,Col2a1,Cplane1,Cramp1l,Crebbp,Crk,Ctnnb1,Dzip1l,Efna5,Ermp1,Ext1,Eya4,Fgfr1,Foxn3,Glg1,Gli3,Golgb1,Hspg2,Ift172,Inhba,Irf6,Itgav,Itgb1,Kat6a,Kcnj2,Lrp6,Luzp1,Map3k7,Megf8,Mnt,Ncor2,Pbx1,Pcnt,Pdgfra,Prrx1,Sdccag8,Sh3pxd2a,Smoc1,Sox5,Sufu,Tent5c,Tshz1,Wrn,Zeb1
MP:0000259	abnormal vascular development	9.96e-06	0.000826	81	983	Mouse	Adcy9,Angpt2,Arid2,Arnt,Atp11a,Atp2a2,Birc6,Bmpr1a,Bmpr2,Braf,Brd2,C1galt1,Cacna1c,Cdh5,Crebbp,Ctnnb1,Cxcl12,Dlc1,Dock1,Dusp3,Ece1,Egln1,F2r,Fgf2,Fgfrl1,Flt1,Fn1,Foxo1,Fzd5,Gli3,Hspb7,Hspg2,Itgav,Itgb4,Kat6a,Kras,Krit1,Lepr,Map3k3,Map3k7,Mib1,Mkl2,Myh9,Myocd,Ndst1,Pam,Pbx1,Pcnt,Pdgfra,Pfn1,Pkn2,Plcg1,Pld1,Pofut2,Prrx1,Ptprb,Ptprj,Qk,Rnf213,Rora,Sdc4,Senp1,Setd2,Setd5,Sh3pxd2a,Slco2a1,Smad5,Sptbn1…
MP:0002396	abnormal hematopoietic system morphology/development	1.02e-05	0.000839	341	983	Mouse	Abca1,Abcd2,Abraxas2,Abtb2,Acaca,Acbd5,Ace,Adgrf5,Aff1,Ago2,Ahcyl1,Akap13,Alpl,Anpep,Arap2,Arf2,Arhgap5,Arhgef1,Arhgef5,Arnt,Arrb1,Atp11a,Atp2a2,Bcl2l11,Bclaf1,Bcr,Birc6,Bmpr1a,Bnip2,Braf,Brd1,Brd2,Bsg,C1galt1,C1qbp,C3ar1,C4b,Cbl,Ccbe1,Ccl11,Ccl25,Ccr2,Cd200,Cd2ap,Cd300a,Cd5l,Cdc42,Cdc73,Cdh5,Cdk6,Cdkal1,Cfh,Cflar,Chd2,Chd4,Chd9,Chsy1,Cmklr1,Col4a1,Col4a2,Cop1,Cpeb4,Crebbp,Csf1r,Csf3r,Ctnnb1,Cux1…
MP:0000010	abnormal abdominal fat pad morphology	1.1e-05	0.000892	44	983	Mouse	Ace,Adrb3,Brd2,Cbl,Cdkal1,Cspg4,Fto,Gfra2,Gpam,Gpd2,Grb10,Igf1r,Il1r1,Insr,Klf3,Kmt2b,Lamp2,Lepr,Lrp1,Mbd5,Ncoa3,Ncor1,Ncor2,Nr2c2,Ntrk2,Osmr,Pde3b,Pnrc2,Ptpn11,Pttg1,Rictor,Rock1,Rps6kb1,Sh3pxd2b,Sprtn,Tardbp,Tbl1xr1,Thra,Tle3,Tmem18,Trp53inp1,Unc5c,Wrn,Zeb1
MP:0000003	abnormal adipose tissue morphology	1.12e-05	0.000896	130	983	Mouse	Ace,Acot11,Adgrf5,Adipor1,Adrb3,Ahcyl1,Ahnak,Alms1,Alpl,Angptl2,Arhgap5,Arrb1,Ash1l,Braf,Brd2,C3ar1,Cbl,Ccl25,Cdc73,Cdkal1,Chd2,Clock,Cluh,Col1a2,Col2a1,Cpe,Crebbp,Crtc1,Cspg4,Ctdspl2,Cux1,Cyb5d1,Dlg3,Dmd,Dnajc3,Dnmt3a,Emc8,Enpp1,Eya4,F7,Fcrls,Fech,Foxo1,Foxo3,Fto,Gfra2,Gpam,Gpd2,Gpr39,Grb10,Igf1r,Ikbkg,Il1r1,Insr,Kat6b,Klf3,Kmt2b,Kmt2d,Kmt5b,Lamp2,Lcn2,Lepr,Leprot,Lmna,Lnpep,Lpar1,Lpl,Lrp1,Lrp6,…
MP:0000433	microcephaly	1.29e-05	0.00101	24	983	Mouse	Arhgef2,Brwd3,Cep63,Col2a1,Ctnnb1,Ddx3x,Dyrk1a,Evc2,Foxn3,Frs2,Huwe1,Itgav,Map3k3,Map3k7,Marcks,Nipbl,Pcnt,Prrx1,Ptpn11,Ptprj,Smoc1,Smurf2,Sufu,Tcf4
MP:0004057	thin myocardium compact layer	1.31e-05	0.00102	15	983	Mouse	Arid2,Atp11a,Atp2a2,Braf,Brd2,Crebbp,Daam1,Egln1,Foxp1,Hexim1,Kmt2d,Map3k7,Ptpn11,Sptbn1,Vcam1
MP:0002884	abnormal pharyngeal arch morphology	1.4e-05	0.00108	31	983	Mouse	Akap13,Cdh5,Ctnnb1,Dlc1,Ece1,Fgfr1,Foxo1,Frs2,Gli3,Itgav,Itgb1,Kat6a,Krit1,Map3k7,Mau2,Med12,Mib1,Mkl2,Nipbl,Pbx1,Pkn2,Por,Rad17,Rere,Setd2,Sh3pxd2a,Smad5,Traf6,Twsg1,Ubr5,Zeb2
MP:0000281	abnormal interventricular septum morphology	1.67e-05	0.00127	58	983	Mouse	Adcy9,Arid2,Atp11a,Atp2a2,Bmpr1a,Bmpr2,Braf,Brd2,Col4a2,Cplane1,Crebbp,Cxcl12,Daam1,Ddx3x,Dock1,Ece1,Egln1,Fgfrl1,Foxp1,Frs2,Gja5,Hectd1,Hexim1,Kat6a,Klf3,Kmt2d,Kras,Lama5,Ldb3,Luzp1,Megf8,Mkl2,Naca,Ncor2,Nipbl,Nox4,Otud7b,Pbrm1,Pcnt,Pdgfra,Pmm2,Ptcd1,Ptpn11,Rere,Rfx3,Ryr2,Setd5,Sh3pxd2a,Sh3pxd2b,Sptbn1,Srsf10,Ssr1,Sufu,Tent5c,Thbs1,Traf6,Trip11,Vcam1
MP:0002092	abnormal eye morphology	1.89e-05	0.00142	180	983	Mouse	2900026A02Rik,4932438A13Rik,Abca1,Acbd3,Acvr2a,Adcy9,Adgrf5,Adipor1,Aff1,Ahcyl1,Alkbh1,Alms1,Angpt2,Anpep,Anxa6,Ash1l,Atp11a,Atrx,Atxn7,Bmpr1a,Braf,Brd1,Brd2,Cant1,Ccr2,Cd46,Cdc42,Cdh13,Cdh5,Cdkal1,Cfh,Chd2,Chsy1,Cnbp,Cog3,Col18a1,Col2a1,Col4a1,Col4a2,Crocc,Ctnnb1,Cyp1b1,Cyp26b1,Dcn,Dgkd,Dmd,Dock5,Dst,Dync2h1,Dzip1l,Ece1,Efna5,Elk4,Emc8,Eml1,Enpp1,Entpd1,Epb41l5,Ephb2,Ercc6,Ermp1,Ext1,Fat1,Fgf2,F…
MP:0002429	abnormal blood cell morphology/development	2.21e-05	0.00164	143	983	Mouse	Aff1,Ago2,Akap13,Arhgef1,Arnt,Bcl2l11,Bcr,Birc6,Braf,Brd1,Bsg,C1galt1,C1qbp,C3ar1,Cbl,Ccbe1,Ccr2,Cd5l,Cdh5,Cdk6,Cflar,Chd2,Chd4,Cmklr1,Col4a1,Cop1,Cpeb4,Crebbp,Csf1r,Csf3r,Cux1,Cxcl12,Cycs,Dclre1c,Dido1,Dlc1,Dnmt1,Dyrk1a,Egln1,Elk4,Ep400,Epb41,Erap1,Ern1,Ets1,Fancc,Fech,Fgf2,Fgfrl1,Fn1,Foxo1,Foxo3,Foxp1,Fubp1,Gab2,Git2,Gjc1,Gon4l,Hfe,Hsd17b11,Huwe1,Ikbkg,Il15ra,Il6st,Inhba,Irf2bp2,Itga4,Itgb1,Itp…
MP:0013657	abnormal blood cell morphology	2.71e-05	0.00199	225	983	Mouse	Abca1,Abraxas2,Acbd5,Ace,Adgrf5,Aff1,Ago2,Ahcyl1,Akap13,Arf2,Arhgef1,Arhgef5,Arnt,Arrb1,Atp11a,Bcl2l11,Bcr,Birc6,Braf,Brd1,Bsg,C1galt1,C3ar1,C4b,Cbl,Ccbe1,Ccl11,Ccr2,Cd300a,Cd5l,Cdc42,Cdh5,Cdk6,Cfh,Cflar,Chd2,Chd4,Chsy1,Cmklr1,Col4a1,Col4a2,Cpeb4,Crebbp,Csf1r,Csf3r,Ctnnb1,Cux1,Cxcl12,Cyb5d1,Cycs,Dclre1c,Dido1,Dlg3,Dnajc10,Dnmt1,Dusp3,Dyrk1a,Ecm1,Egln1,Elk4,Entpd1,Ep400,Epb41,Epb41l5,Erap1,Ern1,Et…
MP:0002114	abnormal axial skeleton morphology	2.76e-05	0.002	165	983	Mouse	Acan,Acvr2a,Adcy9,Alkbh1,Alpl,Antxr1,Ash1l,Atp11a,Atxn1,Atxn1l,Atxn7,Bmpr1a,Bmpr2,Bnip2,Braf,Brd2,Cbx5,Cdc42,Cdc73,Chd2,Chsy1,Clcn5,Cnbp,Col11a2,Col18a1,Col1a2,Col27a1,Col2a1,Col4a2,Cplane1,Creb3l2,Crebbp,Csf1r,Ctnnb1,Cycs,Cyp26b1,Dcn,Dlg3,Dmd,Dock1,Dync2h1,Ece1,Eml1,Enpp1,Entpd1,Evc,Evc2,Ext1,Fat1,Fat4,Fgfr1,Fgfrl1,Foxn3,Glg1,Gli3,Grem2,Gtf2a1,Hectd1,Hipk2,Hspg2,Il1r1,Inhba,Inka2,Irf6,Itgb1,Jam3…
MP:0002108	abnormal muscle morphology	2.87e-05	0.00205	130	983	Mouse	Adipor1,Akap13,Alpl,Atp11a,Atxn1,Bmpr1a,Braf,Brd2,Btaf1,Cacna1c,Camk2d,Cdc73,Cflar,Chd2,Clu,Col1a2,Col3a1,Col4a1,Col4a2,Col6a3,Creb1,Crk,Ctnnb1,Cxcl12,Daam1,Dcn,Ddx3x,Dmd,Dock1,Dst,Dtna,Egln1,Enpp1,Erbb4,Fat1,Fgfr1,Fgfrl1,Fn1,Foxo1,Foxp1,Gas7,Gfra1,Gjc1,Grb10,H6pd,Hexim1,Hspb7,Hspg2,Igf1,Igf1r,Inhba,Insr,Itgav,Itgb1,Kalrn,Kat6b,Kdm4a,Kmt2a,Kmt2d,Kras,Large1,Ldb3,Lepr,Lmna,Lpl,Lrp1,Mad1l1,Map3k3,M…
MP:0003231	abnormal placenta vasculature	3.49e-05	0.00244	28	983	Mouse	Arnt,Birc6,Braf,Cdh5,Ctnnb1,Ddx3x,Dlc1,Ern1,Fn1,Fzd5,Gjc1,Itgav,Itgb1,Kras,Lama5,Map3k3,Myh9,Notch2,Pdgfra,Rictor,Rtel1,Sdc4,Senp1,Setd2,Slk,Ssr3,Tjp1,Wnk1
MP:0002058	neonatal lethality	3.49e-05	0.00244	115	983	Mouse	Acan,Acvr2a,Aff4,Ago2,Arnt,Atp1a2,Atp2a2,Atxn1l,Birc6,Bmpr1a,Braf,Cacna1c,Cbl,Cdc42,Cluh,Cnbp,Col27a1,Col2a1,Cpeb4,Creb3l2,Creb5,Ctnnb1,Cux1,Cxcl12,Cyp26b1,Daam1,Dgkd,Ece1,Ext1,Eya4,F7,Fat1,Fat4,Fgfr1,Fgfrl1,Fndc3b,Foxp1,Fubp1,Gfra1,Gja5,Gli3,Gprc5b,Grem1,Gtf2a1,Gucy1b1,Hexim1,Huwe1,Igf1,Igf1r,Il6st,Inhba,Irf6,Itga3,Itgav,Itgb1,Itgb4,Kat6a,Kcnj2,Kdm5a,Kdm5b,Kit,Klf3,Kmt2d,Kmt5b,Lama5,Ldb3,Lfng,Li…
MP:0005375	adipose tissue phenotype	3.54e-05	0.00246	131	983	Mouse	Ace,Acot11,Adgrf5,Adipor1,Adrb3,Ahcyl1,Ahnak,Alms1,Alpl,Angptl2,Arhgap5,Arrb1,Ash1l,Braf,Brd2,C3ar1,Cbl,Ccl25,Cdc73,Cdkal1,Chd2,Clock,Cluh,Col1a2,Col2a1,Col3a1,Cpe,Crebbp,Crtc1,Cspg4,Ctdspl2,Cux1,Cyb5d1,Dlg3,Dmd,Dnajc3,Dnmt3a,Emc8,Enpp1,Eya4,F7,Fcrls,Fech,Foxo1,Foxo3,Fto,Gfra2,Gpam,Gpd2,Gpr39,Grb10,Igf1r,Ikbkg,Il1r1,Insr,Kat6b,Klf3,Kmt2b,Kmt2d,Kmt5b,Lamp2,Lcn2,Lepr,Leprot,Lmna,Lnpep,Lpar1,Lpl,Lrp…
MP:0003755	abnormal palate morphology	3.74e-05	0.00256	50	983	Mouse	Acan,Acvr2a,Arhgap29,Bmpr1a,Cdc42,Col2a1,Cplane1,Cramp1l,Crebbp,Crk,Ctnnb1,Dzip1l,Efna5,Ermp1,Ext1,Eya4,Fgfr1,Foxn3,Glg1,Gli3,Golgb1,Hspg2,Ift172,Inhba,Irf6,Itgav,Itgb1,Kat6a,Kcnj2,Lmna,Lrp6,Luzp1,Map3k7,Megf8,Mnt,Ncor2,Pbx1,Pcnt,Pdgfra,Prrx1,Sdccag8,Sh3pxd2a,Smoc1,Sox5,Sufu,Tent5c,Trps1,Tshz1,Wrn,Zeb1
MP:0006113	abnormal heart septum morphology	3.96e-05	0.00266	63	983	Mouse	Adcy9,Arid2,Atp11a,Atp2a2,Bmpr1a,Bmpr2,Braf,Brd2,Col4a2,Cplane1,Crebbp,Cxcl12,Daam1,Ddx3x,Dock1,Dync2h1,Ece1,Egln1,Fat4,Fgfrl1,Foxp1,Frs2,Gja5,Hectd1,Hexim1,Ift172,Kat6a,Klf3,Kmt2d,Kras,Lama5,Ldb3,Lrp1,Luzp1,Megf8,Mkl2,Naca,Ncor2,Ndst1,Nipbl,Nox4,Otud7b,Pbrm1,Pcnt,Pdgfra,Pmm2,Ptcd1,Ptpn11,Rere,Rfx3,Ryr2,Setd5,Sh3pxd2a,Sh3pxd2b,Sptbn1,Srsf10,Ssr1,Sufu,Tent5c,Thbs1,Traf6,Trip11,Vcam1
MP:0003229	abnormal vitelline vasculature morphology	3.97e-05	0.00266	41	983	Mouse	Arnt,Atp11a,Bmpr1a,Bmpr2,Braf,Cdh5,Crebbp,Ctnnb1,Dlc1,F2r,Fgfrl1,Flt1,Fn1,Foxo1,Fzd5,Itgav,Kras,Map3k7,Mib1,Mkl2,Myh9,Myocd,Pam,Pdgfra,Pkn2,Ptprb,Ptprj,Qk,Senp1,Setd2,Setd5,Sh3pxd2a,Smad5,Sptbn1,Supt20,Tjp1,Traf6,Trim28,Wnk1,Zfp148,Zfp568
MP:0004848	abnormal liver size	4.29e-05	0.00285	68	983	Mouse	Acan,Acox1,Alms1,Atp11a,Atp8b1,Braf,Brd1,Bsg,Ccbe1,Ccr2,Cdc73,Cdh5,Cpe,Dyrk1a,Egln1,Entpd5,Ern1,Fech,Fubp1,Grb10,Greb1l,Igf1r,Ikbkg,Il1r1,Insr,Kat6a,Klf3,Kmt2a,Kmt2b,Kras,Lamp2,Lcn2,Lepr,Lrp6,Mbd5,Mecp2,Ncoa3,Ncor1,Nf2,Ntrk2,Osmr,Pbrm1,Pbx1,Pex5,Por,Pou2f1,Ptpn11,Rictor,Rps27l,Senp1,Sh3pxd2a,Slc39a14,Smg1,Smpd1,Sod2,Sptb,Sptbn1,Steap4,Sufu,Tet2,Thra,Tmod3,Tnfrsf11a,Traf6,Trap1,Trp53inp1,Wwox,Xbp1
MP:0009250	abnormal appendicular skeleton morphology	4.61e-05	0.00302	98	983	Mouse	Acan,Adgrf5,Alkbh1,Alpl,Antxr1,Ascc3,Ash1l,Atad2b,Bmpr1a,Bmpr2,Bnip2,Cdc42,Chd2,Chsy1,Col11a2,Col1a2,Col27a1,Col2a1,Cplane1,Creb3l2,Crebbp,Csf1r,Ctnnb1,Cyp26b1,Dusp3,Evc,Evc2,Ext1,F2r,Fat4,Fgfr1,Fgfrl1,Galnt17,Glg1,Gli3,Grem1,Hspg2,Iah1,Ift172,Igf1,Il6st,Irf6,Itgb1,Kat6b,Kmt2a,Lepr,Lfng,Lifr,Lmbr1,Lmna,Ltbp3,Map3k20,Mbd5,Mbtps1,Megf8,Mib1,Mxra7,Nfix,Nipbl,Notch2,Ntrk2,P2rx7,Pbx1,Pcnt,Pdgfra,Pfn1,…
MP:0005621	abnormal cell physiology	4.98e-05	0.00324	356	983	Mouse	Abca1,Abhd2,Acot11,Adipor1,Ago2,Alkbh1,Alkbh5,Alms1,Angpt2,Angptl2,Antxr1,Arhgap32,Arhgef2,Arid2,Arnt,Atf6,Atp2a2,Atrx,Bcl2l11,Bclaf1,Birc6,Bmpr1a,Bmpr2,Bptf,Braf,Brd1,Brd2,C1galt1,C1qa,C1qbp,Cacfd1,Cacna1c,Cacna1d,Camk2d,Cbfa2t2,Cbx7,Ccbe1,Ccni,Ccr2,Cd200,Cd38,Cdc42,Cdc73,Cdh5,Cdk12,Cdk6,Cdkal1,Cep63,Cflar,Chd2,Chd4,Chd8,Clcn5,Clec12a,Clock,Cluh,Cmklr1,Cnbp,Col2a1,Cpeb4,Crebbp,Csf1r,Csf3r,Cspg4,…
MP:0011092	embryonic lethality, complete penetrance	5.04e-05	0.00324	61	983	Mouse	Aebp2,Ankfy1,Arnt,C1galt1,Cdc73,Cdh5,Chd4,Chd8,Col3a1,Col4a1,Crebbp,Ctnnb1,Dnmt1,Dyrk1a,Fech,Fgfr1,Fn1,Foxo1,Gabpa,Glg1,Greb1l,Hcfc1,Hspa9,Itgb1,Kit,Kmt2a,Kmt2b,Kras,Letm1,Mcm9,Med12,Mtr,Myocd,N6amt1,Nf2,Pdha1,Plcg1,Pmm2,Pno1,Pofut2,Ptcd1,Ptpn11,Qk,Ranbp2,Rest,Rif1,Rock2,Rpl27a,Ryr2,Specc1l,Sprtn,Tanc2,Tardbp,Tead1,Tle3,Tln1,Trim28,Trpm7,Trrap,Usp37,Usp7
MP:0000352	decreased cell proliferation	5.26e-05	0.00335	72	983	Mouse	Arid2,Atf6,Atrx,Birc6,Bmpr1a,Bptf,Brd2,C1qbp,Cacfd1,Ccr2,Cdc73,Col2a1,Cspg4,Ctnnb1,Dido1,Dnmt1,Fat4,Fgfrl1,Fn1,Fndc3b,G3bp1,Gabpa,Gins4,Hcfc1,Hipk2,Hspb7,Hspg2,Ino80,Itgb1,Kmt2a,Kmt2c,Kmt2d,Lama5,Lmna,Map3k7,Mcm9,Mcur1,Mdm4,Ncoa3,Ncoa4,Ndst1,Notch2,Nrf1,Numa1,Pbx1,Pkn2,Ptges3,Ptp4a2,Ptpn11,Pttg1,Rad54l2,Rictor,Rif1,Rora,Sel1l,Skil,Slc26a2,Slc39a14,Slk,Smg1,Smg6,Sod2,Sprtn,Sptbn1,Stag1,Sumo2,Tasp1…
MP:0011180	abnormal hematopoietic cell number	5.36e-05	0.00338	238	983	Mouse	Abca1,Abraxas2,Abtb2,Acaca,Acbd5,Ace,Adgrf5,Aff1,Ago2,Akap13,Alpl,Anpep,Arap2,Arhgef1,Arhgef5,Arnt,Arrb1,Atp11a,Bcl2l11,Bclaf1,Bcr,Bmpr1a,Bnip2,Braf,Brd1,Bsg,C1galt1,C3ar1,C4b,Cbl,Ccbe1,Ccl11,Ccl25,Ccr2,Cd200,Cd300a,Cd5l,Cdc42,Cdh5,Cdk6,Cdkal1,Cfh,Cflar,Chd2,Chd4,Chd9,Cmklr1,Col4a1,Col4a2,Cpeb4,Crebbp,Csf1r,Csf3r,Ctnnb1,Cux1,Cx3cl1,Cxcl12,Cycs,Dclre1c,Ddx42,Dido1,Dlg3,Dnmt3a,Dyrk1a,Egln1,Elk4,Ent…
MP:0011496	abnormal head size	6.41e-05	0.004	26	983	Mouse	Arhgef2,Brwd3,Cep63,Col2a1,Ctnnb1,Ddx3x,Dyrk1a,Evc2,Foxn3,Frs2,Huwe1,Itgav,Lama5,Map3k3,Map3k7,Marcks,Nfix,Nipbl,Pcnt,Prrx1,Ptpn11,Ptprj,Smoc1,Smurf2,Sufu,Tcf4
MP:0002177	abnormal outer ear morphology	6.72e-05	0.00415	27	983	Mouse	Bmpr1a,Cbl,Col4a2,Ctnnb1,Ece1,Fgfr1,Gli3,Irf6,Itgb1,Kat6b,Kit,Kmt2a,Kras,Lama5,Lmna,Lrp6,Mau2,Ncoa3,Ndst1,Nipbl,Pbx1,Prrx1,Ptpn11,Rpl27a,Sptbn1,Tshz1,Twsg1
MP:0001718	abnormal visceral yolk sac morphology	6.85e-05	0.00419	36	983	Mouse	Ago2,Arnt,Bmpr1a,Cdh5,Crebbp,Ctnnb1,Dlc1,Dnmt1,Egln1,Epb41l5,Fgfr1,Flt1,Fn1,Foxo1,Fzd5,Kras,Krit1,Mib1,Mkl2,Myh9,Myocd,Pkn2,Plcg1,Ptpn11,Ptprb,Qk,Setd2,Smad5,Sufu,Supt20,Tead1,Tjp1,Tnrc6a,Ubr5,Wnk1,Zfp568
MP:0013659	abnormal erythroid lineage cell morphology	7.08e-05	0.00426	119	983	Mouse	Ace,Adgrf5,Ago2,Arf2,Arnt,Arrb1,Braf,Brd1,Ccbe1,Cdk6,Cfh,Cflar,Chd2,Chsy1,Col4a1,Col4a2,Cpeb4,Cxcl12,Cyb5d1,Dido1,Dnajc10,Dusp3,Ecm1,Egln1,Eif2ak2,Elk4,Ep400,Epb41,Epb41l5,Fam110b,Fam210a,Fam53b,Fech,Fgfrl1,Flt1,Foxo3,Glg1,Havcr2,Il6st,Inhba,Insr,Irf2bp2,Itga4,Itgb1,Itgb5,Kat6a,Kdm5c,Kit,Klf13,Klf3,Klf9,Kmt2a,Kras,Lcn2,Lepr,Maea,Mdm4,Mindy1,Msi2,Mtus1,Mysm1,Natd1,Ncor1,Ncor2,Nr2c2,Nr3c1,Nsmf,Nxpe…
MP:0001299	abnormal eye distance/ position	7.09e-05	0.00426	18	983	Mouse	Bmpr1a,Col2a1,Ctnnb1,Dst,Dync2h1,Dzip1l,Fgfr1,Hectd1,Inhba,Itgb1,Kras,Lmna,Lpar1,Ltbp3,Map3k1,Pfas,Ptpn11,Sh3pxd2b
MP:0011101	prenatal lethality, incomplete penetrance	7.4e-05	0.0044	57	983	Mouse	Adcy7,Arhgef12,Arnt,Atp2a2,Atrx,Bmpr2,Cbl,Col2a1,Col4a1,Col4a2,Cplane1,Crebbp,Ctnnb1,Cycs,Dido1,Dnmt1,Ets1,Ext1,Fgfr1,Fn1,Fubp1,Galnt1,Gli3,Gpd2,Igf1,Jam3,Kdm4c,Kit,Kmt5b,Kras,Lfng,Lifr,Lrp6,Luzp1,Mbtps1,Med12,Msi2,Nfatc3,Notch2,Pdha1,Pfn1,Pmm2,Por,Ptgir,Rock2,Setd7,Skil,Smchd1,Sptb,Supt20,Tasp1,Thbs1,Tie1,Twsg1,Ube2w,Ubr2,Vcam1
MP:0005334	abnormal fat pad morphology	7.63e-05	0.0045	49	983	Mouse	Ace,Adrb3,Brd2,C3ar1,Cbl,Cdkal1,Cspg4,Fto,Gfra2,Gpam,Gpd2,Grb10,Igf1r,Il1r1,Insr,Klf3,Kmt2b,Lamp2,Lepr,Lpl,Lrp1,Mbd5,Mecp2,Med13,Ncoa3,Ncor1,Ncor2,Nr2c2,Ntrk2,Osmr,Pde3b,Pnrc2,Ptpn11,Pttg1,Rictor,Rock1,Rps6kb1,Senp1,Sh3pxd2b,Sprtn,Tardbp,Tbl1xr1,Thra,Tle3,Tmem18,Trp53inp1,Unc5c,Wrn,Zeb1
MP:0002135	abnormal kidney morphology	8.5e-05	0.00491	112	983	Mouse	Abca1,Ace,Alms1,Ash1l,Atad2b,Bcl2l11,Bcr,Bmpr2,Braf,Brd2,C1galt1,C1qa,C4b,Ccni,Ccr2,Cd2ap,Cdc42,Cdc73,Cfh,Chd2,Clcn5,Clu,Col18a1,Col4a1,Cplane1,Ctnnb1,Dcn,Dock1,Dync2h1,Dzip1l,Efna5,Egln1,Enpp1,Entpd1,Epb41,Erap1,Ermp1,Fat1,Fat4,Fgfrl1,Fh1,Frs2,Fryl,Gfra1,Gli3,Greb1l,Grem1,Hipk2,Hr,Ift172,Igf1,Itga1,Itga3,Itgb1,Kirrel,Kit,Klf3,Kras,Lama5,Lcn2,Lepr,Lifr,Lin7c,Lrrk2,Manba,Megf8,Mgat5,Mmp17,Mtus1,My…
MP:0002138	abnormal hepatobiliary system morphology	8.53e-05	0.00491	149	983	Mouse	Abca1,Acaca,Acan,Acot11,Acox1,Adcy9,Adipor1,Alms1,Atf6,Atp11a,Atp8b1,Bcr,Birc6,Braf,Brd1,Brd2,Bsg,Cbl,Cbx7,Ccbe1,Ccr2,Cdc73,Cdh5,Cdkal1,Chd2,Clock,Col3a1,Cpe,Crebbp,Cspg4,Ctnnb1,Cxcl12,Dyrk1a,Dzip1l,Egln1,Enpp1,Entpd1,Entpd5,Epb41,Ercc4,Ern1,Faf2,Fancm,Fech,Foxo1,Fubp1,Gk,Gpam,Grb10,Greb1l,Gucy1b1,Hfe,Hr,Hspg2,Igf1r,Ikbkg,Il1r1,Il4ra,Il6st,Insr,Irf2bp2,Itgb1,Kat6a,Kit,Klf3,Kmt2a,Kmt2b,Kras,Lamp2,…
MP:0003881	abnormal nephron morphology	8.57e-05	0.00491	68	983	Mouse	Abca1,Ace,Alms1,Ash1l,Bcl2l11,Bcr,C1galt1,C1qa,C4b,Ccni,Ccr2,Cd2ap,Cdc42,Cfh,Chd2,Clu,Col18a1,Col4a1,Cplane1,Ctnnb1,Dcn,Dzip1l,Egln1,Fat1,Fat4,Fgfrl1,Fh1,Fryl,Gfra1,Hr,Ift172,Itga1,Itga3,Itgb1,Kirrel,Kit,Lama5,Lepr,Lifr,Lin7c,Lrrk2,Manba,Mgat5,Mtus1,Myh9,Nf2,Nfat5,Nfia,Notch2,Pbx1,Pdgfra,Pmm2,Podxl,Prkdc,Sdc4,Sdccag8,Slc4a4,Sod2,Sptb,Stag1,Tet2,Tie1,Tjp1,Tns1,Tns2,Trps1,Wnk1,Xdh
MP:0000443	abnormal snout morphology	9.2e-05	0.00523	35	983	Mouse	Acan,Alkbh1,Col11a2,Col27a1,Col2a1,Crebbp,Ctnnb1,Dock1,F7,Fgfr1,Hipk2,Hspg2,Ift172,Irf6,Kmt2a,Kmt2d,Kras,Lmna,Lpar1,Ltbp3,Mau2,Megf8,Nipbl,Pdgfra,Pfas,Prrx1,Ptpn11,Rhobtb3,Setd5,Sh3pxd2a,Sh3pxd2b,Smoc1,Tnfrsf11a,Trip11,Vps54
MP:0003861	abnormal nervous system development	9.43e-05	0.00531	146	983	Mouse	Ago2,Alkbh1,Arhgap32,Arhgef5,Arnt,Atp11a,Atxn1l,Bmpr1a,Braf,Brd1,Brd2,Btaf1,C2cd3,Cdc42,Cdc73,Cep63,Cnbp,Col18a1,Col2a1,Cpeb4,Crebbp,Csf1r,Ctnnb1,Cxcl12,Cycs,D430042O09Rik,Ddx3x,Dlc1,Dlg3,Dnmt1,Dync2h1,Dyrk1a,Efna5,Eml1,Enah,Ep400,Epb41l5,Ephb2,Erbb4,Exoc8,Ext1,F2r,Fat1,Fat4,Fgf2,Fgfr1,Fgfrl1,Fn1,Frs2,Gfra1,Gli3,Gpr161,Greb1l,Hectd1,Hipk2,Hspg2,Ift172,Igf1r,Il6st,Itgav,Itgb1,Jam3,Kalrn,Kat6b,Kit,…
MP:0000516	abnormal renal/urinary system morphology	9.52e-05	0.00531	119	983	Mouse	Abca1,Acbd3,Ace,Alms1,Ash1l,Atad2b,Atp2a2,Bcl2l11,Bcr,Bmpr2,Braf,Brd2,C1galt1,C1qa,C4b,Cacna2d1,Ccni,Ccr2,Cd2ap,Cdc42,Cdc73,Cfh,Chd2,Clcn5,Clu,Col18a1,Col4a1,Cplane1,Ctnnb1,Dcn,Dock1,Dync2h1,Dzip1l,Efna5,Egln1,Enpp1,Entpd1,Epb41,Ephb2,Erap1,Ermp1,Fat1,Fat4,Fgfrl1,Fh1,Frs2,Fryl,Gfra1,Gli3,Greb1l,Grem1,Hipk2,Hr,Huwe1,Ift172,Igf1,Inhba,Itga1,Itga3,Itgb1,Itgb4,Kirrel,Kit,Klf3,Kras,Lama5,Lcn2,Lepr,Lif…
MP:0002189	abnormal myocardial trabeculae morphology	9.78e-05	0.00541	29	983	Mouse	Akap13,Braf,Btaf1,Cflar,Daam1,Ddx3x,Dmd,Egln1,Erbb4,Foxo1,Gjc1,Hspb7,Itgav,Map3k3,Map3k7,Megf8,Naca,Nfat5,Notch2,Por,Ptprb,Ptprj,Ryr2,Sh3pxd2b,Sptbn1,Tead1,Wnk1,Xbp1,Xirp1
MP:0000598	abnormal liver morphology	0.000105	0.00574	138	983	Mouse	Abca1,Acaca,Acan,Acot11,Acox1,Adcy9,Adipor1,Alms1,Atf6,Atp11a,Atp8b1,Bcr,Birc6,Braf,Brd1,Brd2,Bsg,Cbl,Ccbe1,Ccr2,Cdc73,Cdh5,Cdkal1,Chd2,Clock,Col3a1,Cpe,Crebbp,Cspg4,Cxcl12,Dyrk1a,Egln1,Enpp1,Entpd1,Entpd5,Epb41,Ercc4,Ern1,Faf2,Fech,Foxo1,Fubp1,Gk,Gpam,Grb10,Greb1l,Hfe,Hr,Hspg2,Igf1r,Ikbkg,Il1r1,Il4ra,Il6st,Insr,Irf2bp2,Itgb1,Kat6a,Kit,Klf3,Kmt2a,Kmt2b,Kras,Lamp2,Lcn2,Lepr,Lifr,Lmf1,Lmna,Lpl,Lrp1…
MP:0001716	abnormal placenta labyrinth morphology	0.00011	0.006	33	983	Mouse	Abca1,Ago2,Alkbh1,Arnt,Birc6,Braf,Ctnnb1,Ddx3x,Dlc1,Egln1,Ern1,Fgfrl1,Fubp1,Fzd5,Itgav,Itgb1,Kras,Lama5,Map3k3,Myh9,Notch2,Pbrm1,Plk2,Ptp4a2,Rictor,Sdc4,Senp1,Setd2,Slk,Ssr3,Tjp1,Wnk1,Zfp568
MP:0013560	abnormal endocrine gland morphology	0.000113	0.00609	125	983	Mouse	Abca1,Aff1,Ago2,Alms1,Alpl,Arhgap5,Atp11a,Bmpr1a,Braf,Brd2,Bsg,Cacna1d,Cbl,Cd2ap,Cd38,Cd5l,Cdk6,Cdkal1,Cflar,Chd4,Clock,Col4a2,Cpe,Crebbp,Ctnnb1,Cux1,Cxcl12,Cycs,Dclre1c,Dmd,Dnajc3,Dock1,Dyrk1a,Ece1,Efna5,Ehd4,Elk4,Erap1,Ets1,Eya4,Foxo1,Fubp1,Gabpa,Gli3,Gpr39,Grb10,H6pd,Hipk3,Hivep2,Hr,Huwe1,Ikbkg,Il6st,Ildr2,Insr,Itgb1,Itpkb,Kat6a,Kit,Klf13,Kmt2b,Kras,Lama5,Lamp2,Lcn2,Lepr,Lmna,Man2b2,Manba,Map3…
MP:0001648	abnormal apoptosis	0.000126	0.00671	154	983	Mouse	Alkbh5,Alms1,Angpt2,Arnt,Atf6,Bcl2l11,Birc6,Bmpr1a,Braf,Brd1,Brd2,C1qa,Cacfd1,Cacna1c,Camk2d,Ccbe1,Ccni,Ccr2,Cd200,Cd38,Cdc42,Cdc73,Cdh5,Cdk12,Cdk6,Cep63,Cflar,Chd4,Chd8,Clock,Cluh,Cnbp,Col2a1,Ctnnb1,Cx3cl1,Cxcl12,Cycs,Cyp26b1,Dcn,Ddx3x,Dido1,Dnmt1,Dyrk1a,Egln1,Ehd4,Eml1,Entpd5,Ern1,Ets1,F2r,Fat4,Fgf2,Fgfrl1,Fn1,Foxo1,Foxo3,Foxp1,Fryl,G3bp1,Gins4,Gjc1,Grem1,Gtf2a1,Havcr2,Hcfc1,Hipk2,Huwe1,Hyou1,I…
MP:0005455	increased susceptibility to weight gain	0.000151	0.00793	26	983	Mouse	Adipor1,Adrb3,Alms1,Cbl,Clock,Cspg4,Foxo1,Fto,Grb10,Il1r1,Lamp2,Lcn2,Lepr,Mecp2,Mgat4a,Ncor2,Ntrk2,Osmr,Prkab2,Ptpn11,Rictor,Tbl1xr1,Tmem18,Trp53inp1,Wrn,Zeb1
MP:0008221	abnormal hippocampal commissure morphology	0.000151	0.00793	11	983	Mouse	Cables1,Ctnnb1,Enah,Ext1,Fgf2,Fgfr1,Gli3,Itpr3,Marcks,Ndst1,Nfia
MP:0002152	abnormal brain morphology	0.000153	0.00797	197	983	Mouse	Abcd2,Abl2,Acer3,Adcy9,Aff1,Ago2,Akap13,Alkbh1,Arhgap44,Arhgap5,Arhgef2,Arnt,Atp11a,Atp1a2,Atrx,Atxn1,Atxn1l,Atxn7,Bcl2l11,Bmpr1a,Braf,Brd2,Btaf1,C1qa,C2cd3,Cables1,Cacna1c,Cacna1d,Cdc42,Cdkl5,Cep63,Clock,Cnbp,Col18a1,Col2a1,Col4a1,Col4a2,Cplane1,Crebbp,Csf1r,Cspg4,Ctnnb1,Cxcl12,Cycs,D430042O09Rik,Dab2ip,Ddx3x,Dlc1,Dlg3,Dmd,Dst,Dync2h1,Dyrk1a,Efna5,Eml1,Enah,Entpd1,Ephb2,Exoc8,Ext1,F2r,Fat1,Fgf2,…
MP:0011182	decreased hematopoietic cell number	0.000155	0.00798	183	983	Mouse	Abca1,Abtb2,Acaca,Acbd5,Adgrf5,Aff1,Ago2,Akap13,Alpl,Arhgef1,Arhgef5,Arnt,Arrb1,Bcl2l11,Bclaf1,Bcr,Bmpr1a,Bnip2,Braf,Brd1,Bsg,C1galt1,C3ar1,Cbl,Ccbe1,Ccl11,Ccl25,Ccr2,Cd5l,Cdc42,Cdk6,Cdkal1,Cfh,Cflar,Chd2,Chd4,Chd9,Col4a1,Col4a2,Cpeb4,Crebbp,Csf1r,Csf3r,Ctnnb1,Cux1,Cx3cl1,Cxcl12,Cycs,Dclre1c,Ddx42,Dnmt3a,Dyrk1a,Egln1,Elk4,Entpd1,Ep400,Ets1,Fam110b,Fam53b,Fancc,Fcrls,Fech,Fgfrl1,Foxo1,Foxo3,Foxp1,…
MP:0011368	increased kidney apoptosis	0.00016	0.00822	15	983	Mouse	Alms1,Bcl2l11,C1qa,Ccni,Dcn,Fat4,Fgfrl1,Fryl,Itga1,Itgb1,Lama5,Lin7c,Lrrk2,Nfat5,Notch2
MP:0010630	abnormal cardiac muscle tissue morphology	0.000162	0.00825	54	983	Mouse	Akap13,Braf,Btaf1,Cacna1c,Cflar,Chd2,Clu,Daam1,Ddx3x,Dmd,Dtna,Egln1,Erbb4,Fgfr1,Foxo1,Gjc1,Hexim1,Hspb7,Itgav,Itgb1,Kdm4a,Kras,Large1,Ldb3,Lepr,Lmna,Lrp1,Map3k3,Map3k7,Mdm4,Megf8,Myocd,Naca,Nfat5,Ngf,Notch2,Nr3c1,Pdha1,Plec,Pmm2,Polg,Por,Ptpn11,Ptprb,Ptprj,Ryr2,Sh3pxd2b,Sod2,Sptbn1,Tead1,Vps54,Wnk1,Xbp1,Xirp1
MP:0002447	abnormal erythrocyte morphology	0.000168	0.00847	109	983	Mouse	Ace,Adgrf5,Ago2,Arf2,Arnt,Arrb1,Braf,Brd1,Ccbe1,Cdk6,Cfh,Cflar,Chd2,Chsy1,Col4a1,Col4a2,Cpeb4,Cyb5d1,Dido1,Dnajc10,Dusp3,Ecm1,Egln1,Elk4,Ep400,Epb41,Epb41l5,Fam110b,Fam210a,Fam53b,Fech,Fgfrl1,Foxo3,Glg1,Havcr2,Il6st,Inhba,Insr,Irf2bp2,Itgb1,Itgb5,Kat6a,Kdm5c,Kit,Klf13,Klf3,Klf9,Kmt2a,Kras,Lcn2,Lepr,Maea,Mdm4,Mindy1,Msi2,Mtus1,Mysm1,Natd1,Ncor1,Nr2c2,Nsmf,Nxpe5,Osmr,Pacsin2,Pbx1,Picalm,Polg,Pou2f1…
MP:0005390	skeleton phenotype	0.000171	0.00857	256	983	Mouse	Acan,Acvr2a,Adamts5,Adcy9,Adgrf5,Adipor1,Ahcyl1,Alkbh1,Alpl,Antxr1,Ascc3,Ash1l,Atad2b,Atp11a,Atp2a2,Atxn1,Atxn1l,Atxn7,Bmpr1a,Bmpr2,Bnip2,Braf,Brd2,C3ar1,Cbl,Cbx5,Ccr2,Cd200,Cdc42,Cdc73,Cdh13,Chd2,Chsy1,Clcn5,Cnbp,Col11a2,Col18a1,Col1a2,Col27a1,Col2a1,Col4a2,Col6a3,Cpeb4,Cplane1,Creb3l2,Crebbp,Csf1r,Ctnnb1,Cux1,Cyb5d1,Cycs,Cyp26b1,Dcn,Dlg3,Dmd,Dock1,Dusp3,Dync2h1,Ece1,Elk4,Eml1,Enpp1,Entpd1,Epha1…
MP:0004264	abnormal extraembryonic tissue physiology	0.000174	0.00863	49	983	Mouse	Abca1,Arnt,Ash1l,Birc6,Brd1,Cdc73,Chd4,Ddx3x,Epb41l5,Ern1,F2r,Fn1,Foxo1,Fzd5,Irf2bp2,Itga4,Itgb1,Kras,Krit1,Lfng,Map3k3,Map3k7,Mecp2,Mib1,Ncoa2,Pdgfra,Plcg1,Plk2,Pofut2,Ptpn11,Ptprb,Ptprj,Rcor1,Rtel1,Setd2,Slk,Smad5,Ssr3,Sumo2,Supt20,Tjp1,Tln1,Tnrc6a,Trim28,Ubr5,Vcam1,Wnk1,Xbp1,Zfp568
MP:0005370	liver/biliary system phenotype	0.000186	0.00917	167	983	Mouse	Abca1,Acaca,Acan,Ace,Acot11,Acox1,Adcy9,Adipor1,Alms1,Atf6,Atp11a,Atp8b1,Bcr,Birc6,Braf,Brd1,Brd2,Bsg,C3ar1,C4b,Cbl,Cbx7,Ccbe1,Ccr2,Cdc73,Cdh5,Cdkal1,Chd2,Clcn5,Clock,Cluh,Col2a1,Col3a1,Cpe,Crebbp,Cspg4,Ctnnb1,Cxcl12,Cygb,Dyrk1a,Dzip1l,Egln1,Enpp1,Entpd1,Entpd5,Epb41,Ercc4,Ern1,F2r,Faf2,Fancm,Fech,Fn1,Foxo1,Fubp1,Gk,Gpam,Grb10,Greb1l,Gucy1b1,Hcfc1,Hfe,Hr,Hspg2,Igf1r,Ikbkg,Il1r1,Il4ra,Il6st,Insr,I…
MP:0005371	limbs/digits/tail phenotype	0.000188	0.0092	128	983	Mouse	Acan,Adamts5,Adgrf5,Aebp2,Alkbh1,Angptl2,Ascc3,Atad2b,Bclaf1,Bmpr1a,Bnip2,Brwd3,C2cd3,Cbl,Cdc42,Chd2,Chsy1,Col1a2,Col27a1,Col2a1,Col4a2,Cplane1,Creb3l2,Crebbp,Csf1r,Ctnnb1,Cyp26b1,Dse,Dst,Dusp3,Dync2h1,Dzip1l,Epha1,Evc,Evc2,Ext1,F2r,Fam210a,Fat4,Fgfr1,Fn1,Foxo1,Frs2,Fzd7,G3bp1,Galnt17,Glg1,Gli3,Gpr161,Grem1,Hfe,Hspg2,Iah1,Ift172,Il6st,Inka2,Irf6,Itgb1,Kat6a,Kat6b,Kdm7a,Kit,Kmt2a,Krit1,Lama5,Lepr,…
MP:0008081	abnormal single-positive T cell number	0.000191	0.00928	23	983	Mouse	Aff1,Bsg,Cbl,Cdk6,Cflar,Dclre1c,Elk4,Foxo1,Hivep2,Ikbkg,Il15ra,Il6st,Map3k3,Map3k7,Nr3c1,Prkdc,Rictor,Sept9,Sesn1,Stk17b,Stk4,Twsg1,Zeb1
MP:0005293	impaired glucose tolerance	0.000195	0.00939	54	983	Mouse	Adgrf5,Adipor1,Ahnak,Angptl2,Cacna1c,Cacna1d,Cd38,Cdkal1,Clock,Cpe,Crebbp,Crtc1,Cspg4,Foxo1,Foxo3,Fto,Glb1l2,Grb10,Hipk3,Huwe1,Igf1r,Il1r1,Ildr2,Insr,Kmt2b,Lama5,Lcn2,Lepr,Mgat4a,Mtmr3,Ncoa3,Noct,Ntrk2,Osmr,Pam,Pbx1,Prex2,Prkab2,Ptcd1,Ptpn11,Ranbp2,Rictor,Rps6ka3,Rps6kb1,Senp1,Serp1,Sidt2,Slc20a2,Steap4,Tbl1xr1,Thra,Trp53inp1,Vps13c,Zeb1
MP:0011099	lethality throughout fetal growth and development, complete penetrance	0.0002	0.00941	40	983	Mouse	Bmpr2,Brd1,C1galt1,Cacna1c,Cdc42,Cdh5,Col4a1,Col4a2,Fgfr1,Foxp1,Gabpa,Il6st,Itgb1,Kat6a,Kit,Klf3,Kmt2a,Kras,Lama5,Megf8,Mkl2,Ncor1,Ncor2,Nfat5,Pam,Pbrm1,Pbx1,Pcnt,Picalm,Pou2f1,Ptpn11,Rictor,Sel1l,Senp1,Slk,Sptbn1,Stag1,Sufu,Tie1,Tmod3
MP:0001264	increased body size	0.000201	0.00941	56	983	Mouse	Acan,Ace,Aff4,Alms1,Bmpr2,Brd2,Cbl,Cbx7,Cdkal1,Clock,Col2a1,Cpe,Crtc1,Cspg4,Dmd,F2r,Fcrls,Fto,Gpr39,Grb10,Hfe,Igf1r,Il1r1,Inhba,Ino80,Insr,Itpr3,Lepr,Lpl,Mecp2,Mtus1,Naa40,Ncoa3,Nr3c1,Ntrk2,Pde3b,Pdha1,Ptcd1,Ptpn11,Rictor,Rock1,Sec16b,Smarca2,Smg1,Sptbn1,Stard5,Synj2,Tbl1xr1,Thra,Tmem18,Trp53inp1,Tusc5,Ube3a,Zeb1,Zfp14,Zhx3
MP:0002085	abnormal embryonic tissue morphology	0.000202	0.00941	124	983	Mouse	Adcy9,Ago2,Akap13,Alkbh1,Arhgap29,Arnt,Atad3a,Atp11a,Bmpr1a,Bmpr2,Bptf,Brd1,Brd2,Brwd3,C2cd3,Cacna1c,Cdc42,Cdh5,Chd8,Cnbp,Col2a1,Col4a2,Crebbp,Ctnnb1,Cyp26b1,Ddx3x,Dido1,Dlc1,Dnmt1,Ece1,Efna5,Ep400,Epb41l5,Exoc8,Ext1,F2r,Fat4,Fgfr1,Fn1,Foxo1,Frs2,Gfra1,Gli3,Gpr161,Greb1l,Grem1,Hectd1,Hipk2,Huwe1,Ift172,Inhba,Irf6,Itgav,Itgb1,Kat6a,Kit,Kmt2a,Kmt2b,Kmt2d,Kras,Krit1,Lama5,Lfng,Lrp1,Lrp6,Luzp1,Map3k7…
MP:0013693	abnormal hemopoiesis	0.000204	0.00941	122	983	Mouse	Aff1,Ago2,Akap13,Arhgef1,Bcl2l11,Bcr,Birc6,Braf,Brd1,Bsg,C1galt1,C3ar1,Cbl,Ccbe1,Ccr2,Cd5l,Cdh5,Cdk6,Cflar,Chd2,Chd4,Cmklr1,Cpeb4,Crebbp,Csf1r,Csf3r,Cux1,Cxcl12,Cycs,Dclre1c,Dido1,Dnmt1,Dyrk1a,Egln1,Elk4,Ep400,Epb41,Erap1,Ern1,Ets1,Fancc,Fech,Fgf2,Foxo1,Foxp1,Fubp1,Gab2,Git2,Gon4l,Hsd17b11,Huwe1,Ikbkg,Il15ra,Il6st,Irf2bp2,Itga4,Itpkb,Kat6a,Kdm5a,Kit,Klf13,Kmt2a,Kmt2d,Kras,Lama5,Lcn2,Lfng,Maea,Map…
MP:0005406	abnormal heart size	0.000204	0.00941	99	983	Mouse	Abca1,Acan,Ace,Ago2,Akap13,Arhgef1,Atp1a2,Atp2a2,Bmpr1a,Bmpr2,Braf,Brd2,Cacna1c,Cd2ap,Cdc73,Chd2,Csf3r,Ctdsp2,Ctnnb1,Dlc1,Dmd,Dyrk1a,Ece1,Egln1,Emc8,Epb41l5,Erbb4,F2r,Fgfr1,Fubp1,Gjc1,Gucy1a1,Hspb7,Huwe1,Igf1r,Il17rd,Ino80,Itgav,Kdm4a,Klf3,Kras,Lama5,Lamp2,Lcn2,Ldb3,Lepr,Letm1,Lmna,Lnpep,Lrp1,Map3k7,Mdm4,Mecp2,Mib1,Mtus1,Myo6,Myocd,Naca,Ncor1,Ndst1,Notch2,Nox4,Nr3c1,Pbrm1,Pdgfa,Pdha1,Pdlim5,Pkn2,…
MP:0002705	dilated renal tubules	0.000205	0.00941	25	983	Mouse	Alms1,Bcl2l11,Col4a1,Cplane1,Ctnnb1,Dcn,Dzip1l,Itga3,Itgb1,Kirrel,Lama5,Lin7c,Lrrk2,Nfat5,Nfia,Notch2,Pmm2,Sdc4,Sdccag8,Slc4a4,Sod2,Tjp1,Tns1,Tns2,Xdh
MP:0005325	abnormal renal glomerulus morphology	0.000213	0.00973	46	983	Mouse	Abca1,Ace,Ash1l,Bcl2l11,Bcr,C1galt1,C1qa,C4b,Ccni,Ccr2,Cd2ap,Cdc42,Cfh,Chd2,Clu,Col18a1,Col4a1,Egln1,Fat1,Fgfrl1,Fh1,Hr,Ift172,Itga1,Itga3,Itgb1,Kirrel,Kit,Lama5,Lepr,Lifr,Mgat5,Mtus1,Myh9,Notch2,Pbx1,Pdgfra,Prkdc,Sptb,Stag1,Tie1,Tjp1,Tns1,Tns2,Trps1,Xdh
MP:0001614	abnormal blood vessel morphology	0.000218	0.00982	148	983	Mouse	Ace,Adcy9,Angpt2,Anpep,Arhgef1,Arid2,Arnt,Atp11a,Atp2a2,Birc6,Bmpr1a,Bmpr2,Braf,Brd2,C1galt1,Cacna1c,Cant1,Ccr2,Cd46,Cdh13,Cdh5,Cfh,Chd2,Clu,Col18a1,Col3a1,Col4a1,Col4a2,Cplane1,Creb1,Crebbp,Crk,Ctnnb1,Cxcl12,Ddx3x,Dlc1,Dock1,Dusp3,Dync2h1,Ece1,Egln1,Emc8,Enpp1,Entpd5,Ermp1,Ern1,F2r,Fat1,Fgf2,Fgfrl1,Flt1,Fn1,Foxo1,Fzd5,Gja5,Gjc1,Gli3,Gucy1a1,Hectd1,Hexim1,Hspb7,Hspg2,Itga3,Itgav,Itgb1,Itgb4,Kat6a…
MP:0004198	abnormal fetal size	0.000218	0.00982	36	983	Mouse	Alkbh1,Birc6,Cbfa2t2,Chd2,Col27a1,Col2a1,Creb1,Daam1,Dgkd,Frs2,Fubp1,Gabpa,Glg1,Grb10,Itgb1,Kat6a,Kit,Lama5,Lifr,Maea,Mnt,Nipbl,Pdgfa,Pdgfra,Plk2,Polr2a,Ptp4a2,Ptpn11,Senp1,Smc6,Sod2,Ssr1,Ssr3,Stag1,Stx1a,Trip11
MP:0008803	abnormal placental labyrinth vasculature morphology	0.000228	0.0102	20	983	Mouse	Birc6,Braf,Ctnnb1,Ddx3x,Dlc1,Ern1,Fzd5,Itgb1,Kras,Lama5,Map3k3,Myh9,Rictor,Sdc4,Senp1,Setd2,Slk,Ssr3,Tjp1,Wnk1
MP:0003723	abnormal long bone morphology	0.000237	0.0105	78	983	Mouse	Acan,Adgrf5,Alkbh1,Alpl,Antxr1,Ascc3,Atad2b,Bmpr1a,Bnip2,Cdc42,Chd2,Chsy1,Col11a2,Col1a2,Col27a1,Col2a1,Cplane1,Creb3l2,Csf1r,Ctnnb1,Dusp3,Evc,Evc2,Ext1,F2r,Fgfr1,Fgfrl1,Galnt17,Glg1,Gli3,Grem1,Hspg2,Iah1,Ift172,Igf1,Il6st,Irf6,Itgb1,Kat6b,Lepr,Lifr,Lmbr1,Ltbp3,Mbd5,Mbtps1,Mib1,Mxra7,Nfix,Nipbl,Notch2,Ntrk2,P2rx7,Pbx1,Pfn1,Plxna1,Prrx1,Ptpn11,Retreg3,Rps6ka3,Setd2,Sfrp2,Sfrp4,Sh3pxd2b,Slc26a2,Slc…
MP:0011367	abnormal kidney apoptosis	0.000258	0.0114	16	983	Mouse	Alms1,Bcl2l11,C1qa,Ccni,Dcn,Fat4,Fgfrl1,Fryl,Itga1,Itgb1,Lama5,Lin7c,Lrrk2,Nfat5,Notch2,Thbs1
MP:0008247	abnormal mononuclear cell morphology	0.000267	0.0117	201	983	Mouse	Abcd2,Acaca,Acbd5,Ace,Adgrf5,Aff1,Akap13,Anpep,Arap2,Arhgef1,Atp11a,Atp2a2,Bcl2l11,Bclaf1,Bmpr1a,Bnip2,Braf,Bsg,C3ar1,C4b,Cbl,Ccbe1,Ccl25,Ccr2,Cd200,Cd5l,Cdk6,Cdkal1,Cflar,Chd2,Chd4,Chd9,Cmklr1,Crebbp,Csf1r,Csf3r,Ctnnb1,Cux1,Cx3cl1,Cxcl12,Cycs,Dclre1c,Ddx42,Dido1,Dnmt1,Dnmt3a,Dyrk1a,Egln1,Elk4,Entpd1,Entpd5,Entpd7,Ercc6,Ern1,Ets1,Fam110b,Fam160a1,Fam210a,Fcrls,Flt1,Foxo1,Foxo3,Foxp1,Fubp1,Gab2,Ga…
MP:0002398	abnormal bone marrow cell morphology/development	0.000269	0.0117	79	983	Mouse	Acbd5,Ago2,Arhgef5,Atp11a,Braf,Brd1,C1galt1,C3ar1,Cbl,Ccl11,Ccr2,Cdh5,Cdk6,Cflar,Chd2,Crebbp,Csf1r,Csf3r,Ctnnb1,Cxcl12,Dido1,Dlg3,Dst,Egln1,Eif2ak2,Ep400,Fancc,Fgf2,Fgfrl1,Fubp1,Gab2,Galnt1,Git2,Gon4l,Ikbkg,Il1r1,Il33,Il4ra,Il6st,Irf2bp2,Itga4,Jam2,Kat6a,Kit,Klf13,Kmt2a,Kras,Lcn2,Msi2,Myh9,Mysm1,Ncor2,Notch2,Nr3c1,Osmr,P2ry6,Pbx1,Picalm,Plcg1,Pmm2,Polg,Prkdc,Ptpn11,Rcor1,Rpl27a,Rps27l,Senp1,Slc4a…
MP:0005452	abnormal adipose tissue amount	0.000291	0.0125	97	983	Mouse	Acot11,Adgrf5,Adipor1,Adrb3,Ahcyl1,Ahnak,Alms1,Alpl,Angptl2,Arhgap5,Arrb1,Ash1l,Braf,Brd2,Cbl,Ccl25,Cdc73,Cdkal1,Chd2,Col1a2,Cpe,Crebbp,Crtc1,Ctdspl2,Cux1,Cyb5d1,Dlg3,Dmd,Dnmt3a,Emc8,Eya4,F7,Fcrls,Fech,Foxo3,Fto,Gpd2,Igf1r,Ikbkg,Il1r1,Insr,Klf3,Kmt2b,Kmt2d,Kmt5b,Lcn2,Lepr,Leprot,Lmna,Lnpep,Lpar1,Lrp1,Mbd5,Med13,Mindy1,Naa40,Natd1,Ncoa3,Ncor1,Ncor2,Nipbl,Ntrk2,Osmr,Pam,Pfas,Pfn1,Phyh,Polg,Prkab2,P…
MP:0011108	embryonic lethality during organogenesis, incomplete penetrance	0.000298	0.0128	44	983	Mouse	Acvr2a,Aff4,Atrx,Bcl2l11,Braf,Brd1,Cdh5,Crebbp,Ctnnb1,Dyrk1a,Ece1,F2r,Fgfr1,Flrt2,Flt1,Fn1,Gli3,Hspg2,Huwe1,Itga4,Itgav,Itgb1,Kit,Kras,Letm1,Mdm4,Med12,Naca,Nes,Nr2c2,Pdgfa,Pdgfra,Pou2f1,Ptpn11,Ptprj,Rfx3,Rif1,Rlim,Sel1l,Smchd1,Stag1,Tie1,Tmsb4x,Tnrc6a
MP:0001790	abnormal immune system physiology	0.0003	0.0128	269	983	Mouse	Abca1,Abcc1,Acaca,Acan,Ace,Acot11,Acox1,Adamts5,Adcy9,Ahnak,Akap13,Alms1,Angptl2,Anpep,Arhgef1,Arhgef12,Arhgef2,Arhgef5,Arnt,Ash1l,Bcl2l11,Bclaf1,Bcr,Birc6,Bmpr1a,Bmpr2,Braf,Brd2,Bsg,C1galt1,C1qa,C3ar1,C4b,Cabin1,Cacna1c,Cbfa2t2,Cbl,Cbx5,Ccbe1,Ccl11,Ccr2,Cd200,Cd244a,Cd2ap,Cd300a,Cd300c2,Cd38,Cd5l,Cd93,Cdh5,Cdk6,Cfh,Cflar,Chd2,Chd4,Chsy1,Clec12a,Clu,Cmah,Cmklr1,Col3a1,Col4a1,Col4a2,Crebbp,Crocc,C…
MP:0001698	decreased embryo size	0.000308	0.013	79	983	Mouse	Acaca,Arnt,Atp2a2,Atrx,Bmpr1a,Bptf,Braf,Brd2,C1qbp,Cdc42,Cdc73,Cluh,Cnbp,Col2a1,Crebbp,Ctnnb1,Cycs,Daam1,Dyrk1a,Epb41l5,Ern1,Ext1,F2r,Fgfr1,Fn1,Frs2,Gjc1,Greb1l,Hcfc1,Hspg2,Huwe1,Il6st,Itgb1,Kras,Letm1,Lrp6,Map3k7,Mcm9,Mdm4,Mnt,Myh9,N6amt1,Ncoa3,Ncor1,Nes,Nfatc3,Pdgfra,Pdha1,Picalm,Polg,Pou2f1,Ptprb,Ptprj,Qk,Rad54l2,Rictor,Rnaseh2c,Rps6kb1,Rtel1,Rttn,Slk,Smad5,Smc6,Smg1,Smoc1,Sp1,Sptbn1,Sumo2,Tas…
MP:0003717	pallor	0.000311	0.0131	36	983	Mouse	Ago2,Birc6,Bmpr1a,Brd1,Ccbe1,Cdh5,Chd2,Ckap4,Crebbp,Ern1,Fubp1,Itgb1,Kat6a,Kit,Kras,Krit1,Lmf1,Lpl,Lrp1,Maea,Mdm4,Ncor1,Pbx1,Plk2,Pou2f1,Ppp1r15b,Prkdc,Ptprb,Senp1,Slc4a4,Sod2,Sufu,Tmod3,Tnrc6a,Xbp1,Zfp148
MP:0005669	increased circulating leptin level	0.00032	0.0134	23	983	Mouse	Adipor1,Alms1,Brd2,Cdkal1,Clock,Cpe,Crebbp,Fto,Igf1,Il1r1,Insr,Lepr,Lnpep,Ncoa3,Ntrk2,Osmr,Ptcd1,Ptpn11,Rock1,Steap4,Tbl1xr1,Thra,Zeb1
MP:0000913	abnormal brain development	0.000324	0.0134	95	983	Mouse	Ago2,Alkbh1,Atp11a,Atxn1l,Braf,Brd2,Btaf1,C2cd3,Cdc42,Cep63,Col18a1,Col2a1,Crebbp,Csf1r,Ctnnb1,Cxcl12,Cycs,D430042O09Rik,Ddx3x,Dlc1,Dlg3,Dync2h1,Eml1,Exoc8,Ext1,F2r,Fat1,Fgfr1,Fgfrl1,Frs2,Gli3,Gpr161,Greb1l,Hectd1,Hspg2,Ift172,Igf1r,Il6st,Itgav,Itgb1,Jam3,Kat6b,Kit,Kmt2a,Kmt2b,Kras,Lama5,Lpar1,Lrp6,Luzp1,Marcks,Mecp2,Med12,Megf8,Mib1,Ncor2,Ndst1,Nfia,Nfix,Ninj1,Ntrk2,Ophn1,Pcdh19,Pcnt,Pdgfra,Pex5…
MP:0004200	decreased fetal size	0.000327	0.0134	35	983	Mouse	Alkbh1,Birc6,Cbfa2t2,Chd2,Col27a1,Col2a1,Creb1,Daam1,Dgkd,Frs2,Fubp1,Gabpa,Glg1,Grb10,Itgb1,Kat6a,Kit,Lama5,Lifr,Maea,Mnt,Nipbl,Pdgfa,Plk2,Polr2a,Ptp4a2,Ptpn11,Senp1,Smc6,Sod2,Ssr1,Ssr3,Stag1,Stx1a,Trip11
MP:0011091	prenatal lethality, complete penetrance	0.00033	0.0134	53	983	Mouse	Ago2,Akap13,Atp2a2,Ccbe1,Cdc73,Col3a1,Col4a1,Ctnnb1,Cxcl12,Dlc1,Dock1,Egln1,Ep400,Epb41l5,Ext1,Fgfr1,Fn1,Frs2,Fzd5,Gabpa,Hyou1,Ift172,Ikbkg,Kat6b,Kit,Kras,Mad1l1,Map3k7,Mbtps1,Mdm4,Myh9,Ncam1,Ncor2,Nedd4,Nfat5,Pdgfra,Pdha1,Plec,Pmm2,Polr2a,Ranbp2,Rbm39,Rere,Ryr2,Senp1,Skap2,Smarce1,Smg6,Tardbp,Thra,Trpm7,Wapl,Zfhx3
MP:0005508	abnormal skeleton morphology	0.00033	0.0134	237	983	Mouse	Acan,Acvr2a,Adamts5,Adcy9,Adgrf5,Ahcyl1,Alkbh1,Alpl,Antxr1,Ascc3,Ash1l,Atad2b,Atp11a,Atp2a2,Atxn1,Atxn1l,Atxn7,Bmpr1a,Bmpr2,Bnip2,Braf,Brd2,C3ar1,Cbx5,Ccr2,Cdc42,Cdc73,Chd2,Chsy1,Clcn5,Cnbp,Col11a2,Col18a1,Col1a2,Col27a1,Col2a1,Col4a2,Col6a3,Cpeb4,Cplane1,Creb3l2,Crebbp,Csf1r,Ctnnb1,Cux1,Cyb5d1,Cycs,Cyp26b1,Dcn,Dlg3,Dmd,Dock1,Dusp3,Dync2h1,Ece1,Elk4,Eml1,Enpp1,Entpd1,Erlin2,Evc,Evc2,Ext1,F2r,F7,F…
MP:0001256	abnormal body length	0.000342	0.0138	58	983	Mouse	Adgrf5,Arhgap23,Cbfa2t2,Cbx5,Cbx7,Cdc42,Chd2,Col2a1,Cpe,Dnajc10,Dse,Dyrk1a,Evc,Evc2,Fto,Hcfc1,Hfe,Hspg2,Igf1,Igf1r,Il1r1,Il6st,Ino80,Itgb1,Kmt5b,Kras,Lepr,Lfng,Mysm1,Nacad,Nr3c1,Ntrk2,Pappa,Pfn1,Pmm2,Ppp1r9b,Ppp2r3a,Ptpn11,Rhobtb3,Rictor,Rps6ka3,Setd2,Slc20a2,Slc38a10,Smg1,Sod2,Thbs1,Thra,Tmem106b,Tppp,Traf6,Ttc28,Twsg1,Usp24,Usp42,Zbtb20,Zfp14,Zhx3
MP:0005384	cellular phenotype	0.000348	0.014	405	983	Mouse	Abca1,Abhd2,Acot11,Acox1,Acvr2a,Adgrf5,Adipor1,Afap1,Aff4,Ago2,Alkbh1,Alkbh5,Alms1,Angpt2,Angptl2,Antxr1,Arhgap32,Arhgef2,Arid2,Arnt,Atf6,Atp2a2,Atrx,Bcl2l11,Bclaf1,Birc6,Bmpr1a,Bmpr2,Bptf,Braf,Brd1,Brd2,Brwd1,Bsg,C1galt1,C1qa,C1qbp,C2cd3,Cacfd1,Cacna1c,Cacna1d,Camk2d,Cbfa2t2,Cbl,Cbx7,Ccbe1,Ccni,Ccr2,Cd200,Cd38,Cdc42,Cdc73,Cdh5,Cdk12,Cdk6,Cdkal1,Cep63,Cflar,Chd2,Chd4,Chd8,Clcn5,Clec12a,Clip1,Cloc…
MP:0009780	abnormal chondrocyte physiology	0.000356	0.0142	14	983	Mouse	Col27a1,Col2a1,Ctnnb1,Enpp1,Evc2,Glg1,Hspg2,Itgb1,Nacc1,Pbx1,Pfn1,Sfrp2,Thra,Trip11
MP:0003632	abnormal nervous system morphology	0.000371	0.0147	294	983	Mouse	Abca1,Abcd2,Abl2,Acan,Acer3,Adcy9,Aff1,Ago2,Akap13,Alkbh1,Alms1,Alpl,Arhgap32,Arhgap44,Arhgap5,Arhgef2,Arhgef5,Arnt,Atp11a,Atp1a2,Atp8b1,Atrx,Atxn1,Atxn1l,Atxn7,Bcl2l11,Bmpr1a,Bmpr2,Braf,Brd1,Brd2,Btaf1,C1qa,C2cd3,Cables1,Cacna1c,Cacna1d,Ccr2,Cd200,Cd46,Cdc42,Cdc73,Cdkl5,Cep63,Cfh,Clock,Cmah,Cnbp,Col18a1,Col2a1,Col4a1,Col4a2,Cpeb4,Cplane1,Creb1,Crebbp,Crocc,Csf1r,Csf3r,Cspg4,Ctnnb1,Cxcl12,Cycs,D4…
MP:0006412	abnormal T cell apoptosis	0.000382	0.0151	26	983	Mouse	Bcl2l11,Birc6,Braf,Cd38,Cdk6,Cflar,Dyrk1a,Ets1,Foxo1,Foxp1,Havcr2,Ikbkg,Il15ra,Klf13,Lcn2,Map3k7,Mdm4,Nfatc3,Nr3c1,P2ry6,Prkdc,Ripk1,Rps27l,Serpinb9,Stk4,Twsg1
MP:0001533	abnormal skeleton physiology	0.000391	0.0153	87	983	Mouse	Acan,Adamts5,Alkbh1,Alpl,Ash1l,Bmpr1a,Bmpr2,Ccr2,Cd200,Cdc42,Chsy1,Col1a2,Col27a1,Col2a1,Crebbp,Csf1r,Ctnnb1,Elk4,Enpp1,Evc,Evc2,Fam210a,Fat4,Fgfr1,Fgfrl1,Fndc3b,Foxn3,Gab2,Glg1,Gli3,Grem1,Hspg2,Igf1,Igf1r,Il1r1,Il6st,Irf6,Itgb1,Kat6b,Kit,Limd1,Lmna,Lrp6,Ltbp3,Mbtps1,Megf8,Mmp3,Mysm1,Naca,Nacc1,Ncor2,Ndst1,Nfix,Nipbl,Notch2,Nr3c1,P2rx7,Pappa,Pbx1,Pdgfra,Pfn1,Pik3cd,Plk2,Prrx1,Ric1,Rps6ka3,Sfrp2,S…
MP:0010402	ventricular septal defect	0.000431	0.0167	43	983	Mouse	Adcy9,Arid2,Atp11a,Atp2a2,Bmpr1a,Bmpr2,Braf,Brd2,Col4a2,Cplane1,Crebbp,Cxcl12,Daam1,Ddx3x,Dock1,Ece1,Fgfrl1,Foxp1,Gja5,Hectd1,Kat6a,Klf3,Kras,Lama5,Luzp1,Megf8,Mkl2,Ncor2,Nipbl,Otud7b,Pcnt,Pdgfra,Ptpn11,Rere,Rfx3,Setd5,Sh3pxd2a,Sptbn1,Srsf10,Sufu,Tent5c,Traf6,Trip11
MP:0011087	neonatal lethality, complete penetrance	0.000431	0.0167	79	983	Mouse	Acan,Acvr2a,Ago2,Arnt,Atp1a2,Birc6,Bmpr1a,Braf,Cacna1c,Cluh,Col27a1,Col2a1,Creb3l2,Creb5,Ctnnb1,Cxcl12,Cyp26b1,Dgkd,Ece1,Ext1,Eya4,Fat1,Fat4,Fgfr1,Fgfrl1,Fndc3b,Foxp1,Fubp1,Gfra1,Gli3,Grem1,Hexim1,Igf1,Igf1r,Il6st,Inhba,Itga3,Itgav,Itgb1,Itgb4,Kat6a,Kcnj2,Kdm5a,Kit,Kmt2d,Kmt5b,Lama5,Lfng,Lifr,Lpl,Lrp6,Map3k7,Mbtps1,Nalcn,Ndst1,Notch2,Nr3c1,Ntrk2,Pcyt1a,Phf21a,Podxl,Ppp1r15b,Prrx1,Ptbp2,Ptges3,Slc…
MP:0002106	abnormal muscle physiology	0.000441	0.0169	116	983	Mouse	Abca1,Acan,Adcy6,Akap13,Anxa6,Arhgef1,Arhgef12,Arid2,Arrb1,Atp1a2,Atp2a2,Atxn7,Bmpr1a,Bmpr2,Braf,Cacna1c,Cacna2d1,Camk2d,Cbl,Cdc42,Chd2,Clu,Col1a2,Col3a1,Col4a1,Col6a3,Cpe,Creb1,Crk,Daam1,Dmd,Dock1,Dst,Dtna,Ece1,Egln1,Eml1,Entpd1,Erbb4,Fat1,Fgf2,Fgfr1,Foxp1,Gas7,Gja5,Gjc1,Gucy1a1,Gucy1b1,Hexim1,Hipk2,Hspb7,Hspg2,Igf1,Itgav,Itgb1,Kcnj2,Kdm4a,Kit,Klf3,Kmt2d,Kras,Krit1,Lamp2,Large1,Ldb3,Lepr,Lmna,Lp…
MP:0001559	hyperglycemia	0.000443	0.0169	23	983	Mouse	Acaca,Adipor1,Alms1,Clock,Cpe,Crtc1,Dnajc3,Foxo1,Huwe1,Igf1r,Ildr2,Insr,Lepr,Mgat4a,Ncoa3,Ptpn11,Pttg1,Rictor,Rps6kb1,Senp1,Trp53inp1,Tusc5,Wrn
MP:0005312	pericardial effusion	0.000446	0.0169	25	983	Mouse	Akap13,Bmpr1a,Braf,Daam1,Ddx3x,Ece1,F2r,Foxo1,Gjc1,Hspg2,Itgb1,Kmt2b,Mib1,Myocd,Naca,Notch2,Ptpn11,Qk,Rtel1,Rttn,Setd2,Tmsb4x,Ubr5,Vcam1,Xiap
MP:0002123	abnormal definitive hematopoiesis	0.00045	0.017	117	983	Mouse	Aff1,Ago2,Akap13,Arhgef1,Bcl2l11,Bcr,Birc6,Braf,Brd1,Bsg,C1galt1,C3ar1,Cbl,Ccbe1,Ccr2,Cd5l,Cdh5,Cdk6,Cflar,Chd2,Chd4,Cmklr1,Cpeb4,Crebbp,Csf1r,Csf3r,Cux1,Cxcl12,Cycs,Dclre1c,Dido1,Dnmt1,Dyrk1a,Egln1,Elk4,Ep400,Epb41,Erap1,Ern1,Ets1,Fancc,Fech,Fgf2,Foxo1,Foxp1,Fubp1,Gab2,Git2,Gon4l,Hsd17b11,Huwe1,Ikbkg,Il15ra,Il6st,Itga4,Itpkb,Kat6a,Kdm5a,Kit,Klf13,Kmt2a,Kmt2d,Kras,Lama5,Lcn2,Maea,Map3k3,March1,Mc…
MP:0000521	abnormal kidney cortex morphology	0.000463	0.0173	52	983	Mouse	Abca1,Ace,Ash1l,Bcl2l11,Bcr,C1galt1,C1qa,C4b,Ccni,Ccr2,Cd2ap,Cdc42,Cfh,Chd2,Clu,Col18a1,Col4a1,Dcn,Dzip1l,Egln1,Fat1,Fgfrl1,Fh1,Fryl,Hr,Ift172,Itga1,Itga3,Itgb1,Kirrel,Kit,Lama5,Lepr,Lifr,Mgat5,Mtus1,Myh9,Notch2,Pbx1,Pcnt,Pdgfra,Podxl,Prkdc,Sdccag8,Sptb,Stag1,Tie1,Tjp1,Tns1,Tns2,Trps1,Xdh
MP:0004174	abnormal spine curvature	0.000465	0.0173	46	983	Mouse	Acan,Atxn1,Atxn1l,Atxn7,Braf,Brd2,Chd2,Clcn5,Col1a2,Col27a1,Crebbp,Enpp1,Ext1,Fat1,Fat4,Foxn3,Gli3,Hspg2,Itgb1,Large1,Lmna,Lrp1,Ltbp3,Mecp2,Nfix,Ntrk2,Pdgfra,Pex5,Pfn1,Pmm2,Polg,Prnp,Sh3pxd2b,Slc20a2,Slc26a2,Slc39a14,Sprtn,Stag1,Syne1,Tardbp,Thbs1,Thbs2,Timm23,Tnfrsf11a,Trps1,Zfp106
MP:0002827	abnormal renal corpuscle morphology	0.000482	0.0178	48	983	Mouse	Abca1,Ace,Ash1l,Bcl2l11,Bcr,C1galt1,C1qa,C4b,Ccni,Ccr2,Cd2ap,Cdc42,Cfh,Chd2,Clu,Col18a1,Col4a1,Dcn,Egln1,Fat1,Fgfrl1,Fh1,Hr,Ift172,Itga1,Itga3,Itgb1,Kirrel,Kit,Lama5,Lepr,Lifr,Mgat5,Mtus1,Myh9,Notch2,Pbx1,Pdgfra,Podxl,Prkdc,Sptb,Stag1,Tie1,Tjp1,Tns1,Tns2,Trps1,Xdh
MP:0001697	abnormal embryo size	0.000484	0.0178	91	983	Mouse	Abca1,Acaca,Acvr2a,Arnt,Atp2a2,Atrx,Bmpr1a,Bptf,Braf,Brd2,C1qbp,Cdc42,Cdc73,Ckap4,Cluh,Cnbp,Col2a1,Crebbp,Ctnnb1,Cycs,Daam1,Dnmt3a,Dyrk1a,Epb41l5,Ern1,Exoc8,Ext1,Eya4,F2r,Fgfr1,Fn1,Frs2,Gjc1,Gli3,Greb1l,Hcfc1,Hspg2,Huwe1,Il6st,Itgb1,Kras,Krit1,Lama5,Letm1,Lrp1,Lrp6,Map3k7,Mcm9,Mdm4,Mnt,Myh9,N6amt1,Ncoa3,Ncor1,Nes,Nfatc3,Pdgfra,Pdha1,Picalm,Polg,Pou2f1,Ptprb,Ptprj,Qk,Rad54l2,Rictor,Rnaseh2c,Rps6kb…
MP:0008271	abnormal bone ossification	0.000506	0.0185	61	983	Mouse	Alkbh1,Alpl,Bmpr1a,Bmpr2,Cdc42,Col1a2,Col2a1,Crebbp,Csf1r,Ctnnb1,Elk4,Enpp1,Evc,Fam210a,Fat4,Fgfr1,Fgfrl1,Fndc3b,Foxn3,Gli3,Grem1,Hspg2,Igf1,Igf1r,Il6st,Irf6,Itgb1,Kat6b,Lmna,Lrp6,Ltbp3,Mbtps1,Megf8,Mysm1,Naca,Ndst1,Nfix,Nipbl,Notch2,Nr3c1,Pappa,Pdgfra,Plk2,Prrx1,Ric1,Rps6ka3,Sfrp2,Sfrp4,Slc26a2,Slc38a10,Slc39a14,Sox5,Stag1,Tbc1d2b,Thra,Tnfrsf11a,Trip11,Trps1,Twsg1,Xbp1,Zeb1
MP:0010029	abnormal basicranium morphology	0.00051	0.0185	18	983	Mouse	Braf,Brd2,Col2a1,Ctnnb1,Evc,Evc2,Ext1,Fgfr1,Fgfrl1,Foxn3,Gli3,Ltbp3,Pdgfra,Rarg,Sh3pxd2a,Sh3pxd2b,Smg1,Zeb1
MP:0000703	abnormal thymus morphology	0.000511	0.0185	77	983	Mouse	Abca1,Aff1,Alpl,Arhgap5,Atp11a,Braf,Brd2,Bsg,Cbl,Cd2ap,Cd5l,Cdk6,Cflar,Chd4,Col4a2,Crebbp,Cux1,Cycs,Dclre1c,Dock1,Dyrk1a,Ece1,Elk4,Erap1,Ets1,Fubp1,Gabpa,Hivep2,Hr,Ikbkg,Il6st,Itpkb,Kat6a,Kit,Klf13,Lama5,Lamp2,Lcn2,Lmna,Map3k3,Megf8,Msi2,Ncor1,Ndst1,Nfat5,Nfatc3,Nr3c1,Pbx1,Pdgfra,Polg,Prkdc,Prnp,Pttg1,Rictor,Ripk1,Rora,Rpl27a,Rps27l,Ryr2,Sept9,Setd5,Sh3pxd2a,Sp4,Srsf2,Stk17b,Stk4,Tasp1,Tcf4,Tet2,…
MP:0013550	abnormal secondary palate morphology	0.00052	0.0186	30	983	Mouse	Arhgap29,Col2a1,Crebbp,Crk,Ctnnb1,Ext1,Eya4,Fgfr1,Foxn3,Glg1,Gli3,Golgb1,Ift172,Inhba,Irf6,Itgav,Kat6a,Kcnj2,Lmna,Luzp1,Map3k7,Mnt,Ncor2,Pbx1,Pdgfra,Prrx1,Sh3pxd2a,Sox5,Tshz1,Zeb1
MP:0002444	abnormal T cell physiology	0.00052	0.0186	88	983	Mouse	Acaca,Ahnak,Arhgef1,Arhgef12,Arhgef5,Bcl2l11,Bclaf1,Birc6,Braf,Bsg,C3ar1,Cbl,Cbx5,Ccr2,Cd2ap,Cd38,Cdk6,Cflar,Chd4,Cmah,Dclre1c,Dyrk1a,Ecm1,Eif2ak2,Erap1,Ets1,Foxo1,Foxo3,Foxp1,Havcr2,Hr,Ikbkg,Ikzf2,Il15ra,Il1r1,Il33,Il4ra,Il6st,Itga4,Itpkb,Klf13,Lcn2,Lepr,Lrrc32,Ly75,Map3k2,Map3k3,Map3k7,March7,Mbtps1,Mdm4,Mgat5,Mmp3,Myh9,Ncoa3,Nedd4,Nfat5,Nfatc3,Notch2,Nr3c1,Nsmaf,P2ry6,Pbrm1,Pip4k2c,Plcg1,Plec,…
MP:0005376	homeostasis/metabolism phenotype	0.000537	0.0191	515	983	Mouse	A4galt,Abca1,Abcc1,Abcd2,Abhd2,Abraxas2,Acaca,Acan,Acbd3,Ace,Acer3,Acot11,Acox1,Acvr2a,Adcy6,Adcy9,Adgrf5,Adipor1,Adrb3,Ago2,Agtrap,Ahcyl1,Ahnak,Akap13,Alms1,Alpl,Angpt2,Angptl2,Anxa6,Ap3s1,Apobec1,Arhgef1,Arid2,Arnt,Asah2,Ascc3,Ash1l,Atad2b,Atf6,Atp11a,Atp1a2,Atp2a2,Atp8b1,Atxn1l,Bcl2l11,Bclaf1,Bcr,Birc6,Bmpr1a,Bmpr2,Braf,Brd2,Btaf1,C1galt1,C1qa,C2cd3,C3ar1,C4b,Cacfd1,Cacna1c,Cacna1d,Cacna2d3,Ca…
MP:0005391	vision/eye phenotype	0.000541	0.0192	195	983	Mouse	2900026A02Rik,4932438A13Rik,Abca1,Acbd3,Acvr2a,Adcy9,Adgrf5,Adipor1,Aff1,Ahcyl1,Alkbh1,Alms1,Angpt2,Anpep,Anxa6,Ash1l,Atp11a,Atrx,Atxn7,Bmpr1a,Braf,Brd1,Brd2,Cant1,Ccr2,Cd46,Cdc42,Cdh13,Cdh5,Cdkal1,Cdkl5,Cfh,Chd2,Chsy1,Cnbp,Cog3,Col18a1,Col2a1,Col4a1,Col4a2,Col6a3,Crocc,Ctnnb1,Cyp1b1,Cyp26b1,Dcn,Dgkd,Dmd,Dock5,Dst,Dync2h1,Dzip1l,Ece1,Efna5,Elk4,Emc8,Eml1,Enpp1,Entpd1,Epb41l5,Ephb2,Ercc6,Ermp1,Ext…
MP:0002084	abnormal developmental patterning	0.000581	0.0203	63	983	Mouse	Acvr2a,Arnt,Atad3a,Atrx,Bmpr2,Bptf,C2cd3,Cdh5,Chd8,Cnbp,Col2a1,Ctnnb1,Cyp26b1,Ddx3x,Dlg3,Dnmt1,Dync2h1,Epb41l5,Ext1,Fgfr1,Flt1,Fn1,Frs2,G3bp1,Gpr161,Huwe1,Ift172,Itgb1,Kdm5c,Kmt2a,Kmt2b,Krit1,Lfng,Lrp6,Mbtps1,Med12,Megf8,Mib1,Myh9,Nf2,Nsd1,Pbx1,Pdgfra,Pign,Pkn2,Pofut2,Ptpn11,Ptprb,Qk,Rfx3,Rttn,Setd2,Smad5,Smg1,Sufu,Supt20,Tead1,Tjp1,Tln1,Trim28,Ubr5,Zeb2,Zfp568
MP:0004808	abnormal hematopoietic stem cell morphology	0.000587	0.0203	26	983	Mouse	Bcr,Brd1,Cbl,Cdk6,Crebbp,Csf3r,Cxcl12,Ep400,Flt1,Foxo3,Il6st,Jam2,Kat6a,Kdm5a,Kmt2a,Kras,Msi2,Ncor2,Pbx1,Picalm,Prkdc,Ptpn11,Rpl27a,Rps27l,Srsf2,Tet2
MP:0001260	increased body weight	0.00059	0.0203	50	983	Mouse	Acan,Ace,Aff4,Alms1,Bmpr2,Brd2,Cbl,Cdkal1,Clock,Col2a1,Cpe,Crtc1,Cspg4,Dmd,F2r,Fcrls,Fto,Gpr39,Grb10,Hfe,Igf1r,Il1r1,Inhba,Insr,Itpr3,Lepr,Lpl,Mecp2,Mtus1,Naa40,Ncoa3,Ntrk2,Pde3b,Pdha1,Ptcd1,Ptpn11,Rictor,Rock1,Sec16b,Smarca2,Smg1,Stard5,Synj2,Tbl1xr1,Thra,Tmem18,Trp53inp1,Tusc5,Ube3a,Zeb1
MP:0012323	increased total tissue mass	0.00059	0.0203	50	983	Mouse	Acan,Ace,Aff4,Alms1,Bmpr2,Brd2,Cbl,Cdkal1,Clock,Col2a1,Cpe,Crtc1,Cspg4,Dmd,F2r,Fcrls,Fto,Gpr39,Grb10,Hfe,Igf1r,Il1r1,Inhba,Insr,Itpr3,Lepr,Lpl,Mecp2,Mtus1,Naa40,Ncoa3,Ntrk2,Pde3b,Pdha1,Ptcd1,Ptpn11,Rictor,Rock1,Sec16b,Smarca2,Smg1,Stard5,Synj2,Tbl1xr1,Thra,Tmem18,Trp53inp1,Tusc5,Ube3a,Zeb1
MP:0003763	abnormal thymus physiology	0.000591	0.0203	21	983	Mouse	Bcl2l11,Birc6,Braf,Cdk6,Cflar,Ets1,Foxo1,Hr,Il15ra,Il6st,Itpkb,Klf13,Lcn2,Map3k7,Mdm4,Nr3c1,Polg,Prkdc,Ripk1,Rps27l,Twsg1
MP:0000685	abnormal immune system morphology	0.000603	0.0207	277	983	Mouse	Abca1,Abcd2,Abraxas2,Abtb2,Acaca,Acbd5,Ace,Adgrf5,Aff1,Ago2,Akap13,Alpl,Angpt2,Anpep,Arap2,Arhgap5,Arhgef1,Arhgef5,Atp11a,Atp2a2,Bcl2l11,Bclaf1,Bcr,Bmpr1a,Bnip2,Braf,Brd2,Bsg,C1galt1,C3ar1,C4b,Cbl,Ccbe1,Ccl11,Ccl25,Ccr2,Cd200,Cd2ap,Cd300a,Cd5l,Cdc73,Cdh5,Cdk6,Cdkal1,Cflar,Chd2,Chd4,Chd9,Cmklr1,Col4a2,Crebbp,Csf1r,Csf3r,Ctnnb1,Cux1,Cx3cl1,Cxcl12,Cycs,Cyp26b1,Dclre1c,Ddx42,Dido1,Dlg3,Dnmt1,Dnmt3a,D…
MP:0008964	decreased carbon dioxide production	0.000639	0.0217	6	983	Mouse	Cspg4,Foxo1,Fto,Lepr,Ncoa3,Ncor2
MP:0000447	flattened snout	0.000639	0.0217	6	983	Mouse	Acan,Crebbp,Ctnnb1,Kmt2d,Kras,Ptpn11
MP:0002221	abnormal lymph organ size	0.000658	0.0222	121	983	Mouse	Abca1,Aff1,Ago2,Akap13,Alpl,Arhgap5,Arhgef1,Bcl2l11,Braf,Brd2,Bsg,C4b,Cbl,Ccr2,Cd200,Cd2ap,Cdc73,Cdk6,Cflar,Chd2,Chd4,Col4a2,Crebbp,Csf1r,Cux1,Cycs,Dclre1c,Dido1,Dock1,Egln1,Epb41,Erap1,Esyt2,Ets1,Fech,Foxo1,Foxo3,Fubp1,Gabpa,Galnt1,Git2,Gon4l,Hr,Ikbkg,Il15ra,Il17rd,Il6st,Itfg2,Kat6a,Kit,Klf13,Klf3,Kmt2a,Kras,Lama5,Lcn2,Lepr,Lmna,Lyz2,Man2b2,Map3k3,Map3k7,Mavs,Megf8,Msi2,Mtus1,Mxra7,Ncoa3,Ncor1,N…
MP:0004686	decreased length of long bones	0.000695	0.0233	49	983	Mouse	Acan,Adgrf5,Bmpr1a,Chd2,Col27a1,Col2a1,Cplane1,Creb3l2,Csf1r,Ctnnb1,Evc,Evc2,Fgfr1,Fgfrl1,Galnt17,Gli3,Hspg2,Iah1,Ift172,Il6st,Irf6,Itgb1,Lepr,Lmbr1,Ltbp3,Mbd5,Mxra7,Nipbl,Notch2,Pfn1,Prrx1,Ptpn11,Retreg3,Rps6ka3,Setd2,Sfrp2,Sh3pxd2b,Slc26a2,Slc38a10,Slc39a14,Slc4a4,Smoc1,Spata6,Thra,Traf6,Trps1,Ttc28,Twsg1,Zeb1
MP:0000716	abnormal immune system cell morphology	0.000699	0.0233	228	983	Mouse	Abcd2,Abraxas2,Abtb2,Acaca,Acbd5,Ace,Adgrf5,Aff1,Akap13,Alpl,Anpep,Arap2,Arhgef1,Arhgef5,Atp11a,Atp2a2,Bcl2l11,Bclaf1,Bcr,Bmpr1a,Bnip2,Braf,Bsg,C1galt1,C3ar1,C4b,Cbl,Ccbe1,Ccl11,Ccl25,Ccr2,Cd200,Cd300a,Cd5l,Cdh5,Cdk6,Cdkal1,Cflar,Chd2,Chd4,Chd9,Cmklr1,Crebbp,Csf1r,Csf3r,Ctnnb1,Cux1,Cx3cl1,Cxcl12,Cycs,Dclre1c,Ddx42,Dido1,Dlg3,Dnmt1,Dnmt3a,Dyrk1a,Egln1,Elk4,Entpd1,Entpd5,Entpd7,Ercc6,Ern1,Ets1,Fam1…
MP:0001545	abnormal hematopoietic system physiology	0.000708	0.0234	192	983	Mouse	Abca1,Abcc1,Acaca,Adcy9,Ago2,Ahnak,Akap13,Angptl2,Anpep,Arhgef1,Arhgef12,Arhgef2,Arhgef5,Ash1l,Bcl2l11,Bclaf1,Bcr,Birc6,Bmpr1a,Bmpr2,Braf,Bsg,C3ar1,Cabin1,Cbl,Cbx5,Ccbe1,Ccl11,Ccr2,Cd200,Cd244a,Cd2ap,Cd300a,Cd300c2,Cd38,Cd93,Cdc42,Cdh5,Cdk6,Cflar,Chd4,Clec12a,Cmah,Cmklr1,Crtc1,Csf3r,Cspg4,Cxcl12,Dclre1c,Dyrk1a,Ecm1,Eif2ak2,Entpd1,Ep400,Erap1,Ets1,Fancc,Fech,Flt1,Foxo1,Foxo3,Foxp1,Fubp1,Gab2,Gabpb…
MP:0000218	increased leukocyte cell number	0.000711	0.0234	133	983	Mouse	Abraxas2,Acbd5,Ace,Adgrf5,Akap13,Anpep,Arap2,Arhgef1,Atp11a,Bcl2l11,Bclaf1,Bcr,Bnip2,C4b,Ccr2,Cd200,Cd300a,Cdh5,Cdk6,Cflar,Chd2,Chd4,Cmklr1,Crebbp,Csf1r,Ctnnb1,Cxcl12,Dclre1c,Dido1,Dlg3,Egln1,Elk4,Entpd1,Entpd7,Ets1,Fam110b,Fam160a1,Fam210a,Flt1,Foxo1,Foxo3,Galnt1,Gdi2,Hr,Hsd17b11,Hspg2,Il15ra,Il4ra,Il6st,Itfg2,Itga4,Itgav,Itgb5,Itpkb,Jam3,Kdm4c,Kdm5a,Kdm7a,Kit,Klf13,Klf3,Kmt2a,Kmt2d,Kras,Lama5,L…
MP:0000024	lowered ear position	0.000712	0.0234	8	983	Mouse	Fgfr1,Lama5,Mau2,Ncoa3,Ndst1,Nipbl,Prrx1,Twsg1
MP:0000599	enlarged liver	0.000763	0.0249	39	983	Mouse	Acan,Acox1,Alms1,Atp8b1,Ccr2,Cpe,Egln1,Entpd5,Fech,Grb10,Igf1r,Ikbkg,Il1r1,Insr,Klf3,Kmt2b,Kras,Lamp2,Lcn2,Lepr,Lrp6,Mecp2,Nf2,Ntrk2,Osmr,Pex5,Por,Ptpn11,Rictor,Smg1,Smpd1,Sod2,Sptb,Steap4,Tet2,Tnfrsf11a,Traf6,Trap1,Trp53inp1
MP:0003920	abnormal heart right ventricle morphology	0.000768	0.025	34	983	Mouse	Abca1,Atp2a2,Bmpr2,Braf,Brd2,Cacna1c,Cplane1,Crk,Daam1,Dock1,Erbb4,Fgfr1,Fgfrl1,Gucy1a1,Hectd1,Hspg2,Ift172,Itgb1,Klf3,Ldb3,Lmna,Mef2a,Megf8,Ndst1,Ngf,Pdgfa,Rpsa,Ryr2,Sh3pxd2a,Slco2a1,Sod2,Ssr1,Trip11,Wrn
MP:0000217	abnormal leukocyte cell number	0.000792	0.0256	202	983	Mouse	Abraxas2,Abtb2,Acaca,Acbd5,Ace,Adgrf5,Aff1,Akap13,Alpl,Anpep,Arap2,Arhgef1,Arhgef5,Atp11a,Bcl2l11,Bclaf1,Bcr,Bmpr1a,Bnip2,Braf,Bsg,C3ar1,C4b,Cbl,Ccbe1,Ccl11,Ccl25,Ccr2,Cd200,Cd300a,Cd5l,Cdh5,Cdk6,Cdkal1,Cflar,Chd2,Chd4,Chd9,Cmklr1,Crebbp,Csf1r,Csf3r,Ctnnb1,Cux1,Cx3cl1,Cxcl12,Cycs,Dclre1c,Ddx42,Dido1,Dlg3,Dnmt3a,Dyrk1a,Egln1,Elk4,Entpd1,Entpd7,Ets1,Fam110b,Fam160a1,Fam210a,Fcrls,Flt1,Foxo1,Foxo3,F…
MP:0008801	abnormal erythroid progenitor cell morphology	0.000821	0.0264	22	983	Mouse	Brd1,Chd2,Egln1,Eif2ak2,Ep400,Il6st,Irf2bp2,Kat6a,Kit,Klf13,Kmt2a,Lcn2,Ncor2,Nr3c1,Osmr,Picalm,Rcor1,Senp1,Sp1,Srsf2,Tet2,Tmod3
MP:0002082	postnatal lethality	0.000834	0.0266	144	983	Mouse	Abca1,Ace,Adcy7,Aff1,Alpl,Angpt2,Atrx,Atxn1l,Bclaf1,Bmpr1a,Braf,Brd2,Bsg,Cacna1c,Cbfa2t2,Cbl,Cdc42,Chd2,Col2a1,Col3a1,Col4a1,Col4a2,Cpeb4,Creb1,Crebbp,Csf1r,Ctnnb1,Cux1,Dnmt3a,Dst,Dyrk1a,Efna5,Ets1,Evc,Eya4,Fat1,Fgfr1,Flrt2,Foxn3,Fryl,Fto,Gk,Glg1,Gli3,Gpd2,Gpr17,Gprc5b,Grem1,Hspb7,Igf1,Ikbkg,Il6st,Insr,Irf2bp2,Irf6,Itgb1,Jade1,Jam3,Kat6b,Kirrel,Kit,Klf3,Kras,Lama5,Large1,Ldb3,Lfng,Lmf1,Lmna,Lpar1…
MP:0011369	increased renal glomerulus apoptosis	0.000837	0.0266	5	983	Mouse	Bcl2l11,C1qa,Ccni,Itga1,Lrrk2
MP:0004891	abnormal adiponectin level	0.000839	0.0266	17	983	Mouse	Adipor1,Brd2,Cdh13,Crebbp,Fto,Igf1r,Lcn2,Lepr,Lmna,Lnpep,Lrp6,Ncoa3,Ncor2,Pde3b,Ptpn11,Rictor,Zeb1
MP:0001300	ocular hypertelorism	0.000905	0.0285	9	983	Mouse	Bmpr1a,Ctnnb1,Fgfr1,Kras,Lpar1,Ltbp3,Pfas,Ptpn11,Sh3pxd2b
MP:0002270	abnormal pulmonary alveolus morphology	0.000909	0.0285	33	983	Mouse	Abca1,Adgrf5,Aff4,Atxn1l,Bmpr1a,Bmpr2,Col2a1,Crebbp,G3bp1,Grb10,Grem1,Igf1,Itga3,Kmt5b,Lama5,Lfng,Lpl,Lrrk2,Lyz2,Ndst1,Nr3c1,Pcyt1a,Pdgfa,Pdgfra,Pkn2,Podxl,Ptges3,Smpd1,Ssr3,Tie1,Tmtc3,Trip11,Trps1
MP:0001731	abnormal postnatal growth	0.000927	0.0287	118	983	Mouse	Acox1,Alkbh1,Ash1l,Atp8b1,Atxn1,Braf,Cd2ap,Cdc42,Cep63,Chd2,Col11a2,Crebbp,Crk,Csf1r,Cux1,Dnmt1,Dnmt3a,Dst,Dyrk1a,Egln1,Enpp1,Ercc4,Ercc6,Ets1,Evc2,Foxn3,Fryl,Fto,Gk,Gpam,Gucy1b1,Igf1,Igf1r,Ikbkg,Il1r1,Insr,Irf2bp2,Itgb1,Itpkb,Itpr3,Jam3,Kalrn,Kat6b,Kdm5b,Kit,Klf3,Kmt2a,Kmt2c,Kras,Large1,Ldb3,Lmf1,Lmna,Lpar1,Lrp1,Lrp6,Ltbp3,Map3k7,Mbd5,Mecp2,Mnt,Mysm1,Naca,Ncoa3,Nfat5,Nfix,Ngf,Ninj1,Nipbl,Ntrk2,P…
MP:0010899	abnormal pulmonary alveolar system morphology	0.00093	0.0287	39	983	Mouse	Abca1,Adgrf5,Aff4,Atxn1l,Bmpr1a,Bmpr2,Cmklr1,Col27a1,Col2a1,Crebbp,Cux1,Fubp1,G3bp1,Grb10,Grem1,Igf1,Igf1r,Itga3,Kmt5b,Kras,Lama5,Lfng,Lpl,Lrrk2,Lyz2,Ndst1,Nr3c1,Pcyt1a,Pdgfa,Pdgfra,Pkn2,Podxl,Ptges3,Smpd1,Ssr3,Tie1,Tmtc3,Trip11,Trps1
MP:0001340	abnormal eyelid morphology	0.000933	0.0287	36	983	Mouse	Acvr2a,Ash1l,Atp11a,Atxn7,Bmpr1a,Ctnnb1,Cyp26b1,Dgkd,Dst,Eml1,Ext1,Gfra2,Gli3,Hr,Hspg2,Ikzf2,Itgb1,Kmt2c,Lrp6,Luzp1,Map3k1,Mau2,Nfix,Ngf,Nipbl,Ntrk2,Plk2,Rarg,Rock1,Slc20a2,Smoc1,Smurf2,Thbs1,Thra,Traf6,Twsg1
MP:0008246	abnormal leukocyte morphology	0.000935	0.0287	225	983	Mouse	Abcd2,Abraxas2,Abtb2,Acaca,Acbd5,Ace,Adgrf5,Aff1,Akap13,Alpl,Anpep,Arap2,Arhgef1,Arhgef5,Atp11a,Atp2a2,Bcl2l11,Bclaf1,Bcr,Bmpr1a,Bnip2,Braf,Bsg,C3ar1,C4b,Cbl,Ccbe1,Ccl11,Ccl25,Ccr2,Cd200,Cd300a,Cd5l,Cdh5,Cdk6,Cdkal1,Cflar,Chd2,Chd4,Chd9,Cmklr1,Crebbp,Csf1r,Csf3r,Ctnnb1,Cux1,Cx3cl1,Cxcl12,Cycs,Dclre1c,Ddx42,Dido1,Dlg3,Dnmt1,Dnmt3a,Dyrk1a,Egln1,Elk4,Entpd1,Entpd5,Entpd7,Ercc6,Ern1,Ets1,Fam110b,Fam1…
MP:0008037	abnormal T cell morphology	0.000938	0.0287	122	983	Mouse	Acaca,Ace,Aff1,Anpep,Arap2,Arhgef1,Atp11a,Bcl2l11,Bclaf1,Bnip2,Braf,Bsg,C3ar1,Cbl,Ccl25,Ccr2,Cd5l,Cdk6,Cdkal1,Cflar,Chd2,Chd4,Chd9,Crebbp,Ctnnb1,Cux1,Cycs,Dclre1c,Ddx42,Dnmt3a,Dyrk1a,Elk4,Entpd1,Entpd7,Ets1,Fam160a1,Fcrls,Foxo1,Foxp1,Gabpa,Galnt1,Gon4l,Havcr2,Hivep2,Hr,Ikbkg,Il15ra,Il1r1,Il4ra,Il6st,Itfg2,Itga4,Itgav,Itpkb,Kat6a,Kdm7a,Kit,Klf13,Kras,Lamc3,Lepr,Lrba,Ly75,Maea,Map3k3,Map3k7,March1,…
MP:0006319	abnormal epididymal fat pad morphology	0.000946	0.0288	23	983	Mouse	Ace,Brd2,Cbl,Cspg4,Gpd2,Grb10,Insr,Klf3,Kmt2b,Lepr,Lrp1,Ncoa3,Ncor2,Nr2c2,Osmr,Ptpn11,Pttg1,Rictor,Rock1,Rps6kb1,Thra,Trp53inp1,Unc5c
MP:0000202	abnormal circulating alkaline phosphatase level	0.000953	0.0289	40	983	Mouse	Acox1,Adcy6,Alpl,Chd9,Cyb5d1,Elk4,Entpd5,Exoc8,Eya4,Faf2,Fech,Iah1,Insr,Lepr,Lmna,Map3k7,Mindy1,Mtmr3,Mysm1,Ncoa3,Notch2,Phykpl,Rdx,Retreg3,Ric1,Rrad,Sh3pxd2a,Slc20a2,Slc25a4,Slc38a10,Sod2,Supt7l,Thra,Tmem106b,Tmem127,Tppp,Ttc28,Wwox,Xdh,Zbtb20
MP:0002109	abnormal limb morphology	0.000961	0.029	99	983	Mouse	Acan,Adamts5,Adgrf5,Alkbh1,Ascc3,Atad2b,Bclaf1,Bmpr1a,Bnip2,C2cd3,Cdc42,Chd2,Chsy1,Col1a2,Col27a1,Col2a1,Col4a2,Cplane1,Creb3l2,Crebbp,Csf1r,Ctnnb1,Cyp26b1,Dusp3,Dync2h1,Dzip1l,Evc,Evc2,Ext1,F2r,Fam210a,Fgfr1,Fn1,Frs2,Galnt17,Gli3,Gpr161,Grem1,Hspg2,Iah1,Ift172,Il6st,Irf6,Itgb1,Kat6b,Krit1,Lama5,Lepr,Lifr,Lmbr1,Lmna,Lrp1,Lrp6,Map3k20,Mbd5,Mbtps1,Mdm4,Megf8,Mib1,Mindy1,Mxra7,Mysm1,Nipbl,Notch2,P2r…
MP:0006387	abnormal T cell number	0.000973	0.0291	115	983	Mouse	Acaca,Ace,Aff1,Anpep,Arap2,Arhgef1,Atp11a,Bcl2l11,Bclaf1,Bnip2,Braf,Bsg,Cbl,Ccl25,Ccr2,Cd5l,Cdk6,Cdkal1,Cflar,Chd2,Chd4,Chd9,Crebbp,Ctnnb1,Cux1,Cycs,Dclre1c,Ddx42,Dnmt3a,Dyrk1a,Elk4,Entpd1,Entpd7,Ets1,Fam160a1,Fcrls,Foxo1,Foxp1,Gabpa,Galnt1,Gon4l,Havcr2,Hivep2,Hr,Ikbkg,Il15ra,Il1r1,Il4ra,Il6st,Itfg2,Itga4,Itgav,Itpkb,Kat6a,Kdm7a,Kit,Klf13,Kras,Lamc3,Lepr,Lrba,Maea,Map3k3,Map3k7,March1,Mau2,Mavs,M…
MP:0011089	perinatal lethality, complete penetrance	0.000974	0.0291	41	983	Mouse	Arhgap5,Birc6,Col1a2,Col2a1,Crk,Ctnnb1,Cyp26b1,Evc,Evc2,G3bp1,Gfra1,Gli3,Hectd1,Ift172,Irf6,Itgb4,Kat6a,Kit,Kmt2a,Kmt2b,Kmt2c,Kras,Lrp1,Lrp6,Luzp1,Maea,Ndst1,Nedd4,Neo1,Nfat5,Notch2,Nr3c1,Nuak1,Ptges3,Qk,Shroom3,Sod2,Tie1,Tor1aip1,Trio,Zeb1
MP:0000715	decreased thymocyte number	0.00102	0.0303	31	983	Mouse	Braf,Bsg,Cd5l,Cdk6,Crebbp,Cux1,Dclre1c,Dyrk1a,Elk4,Ets1,Gabpa,Il6st,Kit,Klf13,Map3k3,Msi2,Nfatc3,Polg,Prkdc,Prnp,Rictor,Ripk1,Sept9,Srsf2,Stk17b,Tasp1,Tcf4,Trpm7,Twsg1,Zbtb1,Zeb1
MP:0000074	abnormal neurocranium morphology	0.00102	0.0303	39	983	Mouse	Adcy9,Alkbh1,Alpl,Bmpr1a,Braf,Brd2,Col2a1,Crebbp,Ctnnb1,Ece1,Evc,Fgfr1,Fgfrl1,Foxn3,Gli3,Hectd1,Hspg2,Irf6,Kat6b,Lama5,Lmna,Lrp6,Ltbp3,Med12,Mnt,Ndst1,Nipbl,Pbx1,Pdgfra,Pfas,Prrx1,Rarg,Rps6ka3,Sh3pxd2a,Sh3pxd2b,Shroom3,Sox5,Tshz1,Zeb1
MP:0005377	hearing/vestibular/ear phenotype	0.00103	0.0303	102	983	Mouse	Acan,Acvr2a,Adcy9,Alms1,Ap3s1,Atad2b,Atp8b1,Bmpr1a,Brd2,Cacna1d,Cbl,Ckap4,Cmah,Col11a2,Col2a1,Col4a2,Cplane1,Csf1r,Cspg4,Ctnnb1,Dmd,Ece1,Ehd4,Enpp1,Ephb2,Ercc6,Ext1,Eya4,Fat1,Fat4,Fgf2,Fgfr1,Frs2,Gli3,Hnrnph1,Hr,Hspg2,Igf1,Igf1r,Ikzf2,Il17rd,Irf6,Itgb1,Itgb4,Kat6b,Kit,Kmt2a,Kmt2d,Kras,Lama5,Large1,Lfng,Lmna,Lrig2,Lrp6,Map3k1,Map3k20,Mau2,Mecp2,Med28,Myh9,Myo6,Ncoa3,Ndst1,Nf2,Nfix,Nipbl,Ntrk2,P2rx…
MP:0006414	decreased T cell apoptosis	0.00105	0.0308	11	983	Mouse	Bcl2l11,Cdk6,Ets1,Foxo1,Klf13,Lcn2,Mdm4,Nr3c1,P2ry6,Prkdc,Serpinb9
MP:0000771	abnormal brain size	0.00106	0.0308	50	983	Mouse	Akap13,Arhgap44,Arhgef2,Arnt,Atxn1,Atxn7,Braf,Cep63,Cnbp,Cplane1,Ctnnb1,Cycs,Dst,Dyrk1a,Efna5,Frs2,Gli3,Hfe,Huwe1,Igf1r,Itgb1,Kat6b,Klf3,Lrp6,Marcks,Mbd5,Mecp2,Ncam1,Nfix,Nipbl,Ophn1,Pcnt,Pdha1,Pign,Ppp1r9b,Rere,Setd2,Slk,Smpd1,Sptb,Sun1,Syngap1,Tardbp,Tcf4,Trio,Trip11,Ube3a,Usp7,Wwox,Zfp568
MP:0008209	decreased pre-B cell number	0.00106	0.0308	18	983	Mouse	Aff1,Crebbp,Cxcl12,Cycs,Dclre1c,Dyrk1a,Hspa9,Huwe1,Kat6a,Kmt2a,Msi2,Mysm1,Notch2,Pbx1,Polg,Prkdc,Tet2,Twsg1
MP:0012501	abnormal pericardial cavity morphology	0.00107	0.0308	24	983	Mouse	Ago2,Braf,C2cd3,Cflar,Ctnnb1,F2r,Flrt2,Hspg2,Itgav,Kmt2d,Kras,Map3k7,Mib1,Mkl2,Naca,Notch2,Pdgfra,Pkn2,Por,Ptprj,Rtel1,Tmsb4x,Wnk1,Xiap
MP:0004592	small mandible	0.00107	0.0308	24	983	Mouse	Acvr2a,Braf,Cnbp,Col2a1,Cplane1,Ece1,Fgfr1,Fgfrl1,Foxn3,Grem2,Hspg2,Irf6,Itgb1,Kat6b,Lmna,Map3k7,Mau2,Mbtps1,Mnt,Nipbl,Prrx1,Sh3pxd2b,Trps1,Zeb1
MP:0003756	abnormal hard palate morphology	0.00109	0.0312	23	983	Mouse	Arhgap29,Col2a1,Crk,Ctnnb1,Ext1,Eya4,Foxn3,Glg1,Gli3,Inhba,Irf6,Itgav,Kcnj2,Lmna,Luzp1,Map3k7,Ncor2,Pbx1,Pdgfra,Prrx1,Sox5,Tshz1,Zeb1
MP:0010031	abnormal cranium size	0.00109	0.0312	19	983	Mouse	Col18a1,Col2a1,Evc2,Fgfr1,Fgfrl1,Gli3,Hspg2,Jam3,Kras,Lmna,Lrp6,Map3k7,Mbtps1,Mnt,Pdgfra,Pfas,Ptpn11,Rps6ka3,Sh3pxd2b
MP:0000350	abnormal cell proliferation	0.00111	0.0314	117	983	Mouse	Ago2,Alms1,Arid2,Atf6,Atrx,Birc6,Bmpr1a,Bmpr2,Bptf,Braf,Brd2,C1qbp,Cacfd1,Cacna1d,Cbx7,Ccr2,Cdc42,Cdc73,Col2a1,Cspg4,Ctnnb1,Dido1,Dmd,Dnmt1,Ehd4,Eml1,Enpp1,Entpd5,Ets1,Ext1,Fat4,Fgfr1,Fgfrl1,Flt1,Fn1,Fndc3b,Foxp1,G3bp1,Gabpa,Gfra1,Gins4,Grb10,Hcfc1,Hipk2,Hipk3,Hspb7,Hspg2,Huwe1,Igf1r,Ikbkg,Il6st,Ino80,Irf6,Itgb1,Itgb4,Kit,Kmt2a,Kmt2c,Kmt2d,Kras,Lama5,Lmna,Map3k7,Mau2,Mcm9,Mcur1,Mdm4,Med28,Mtus1,N…
MP:0010499	abnormal ventricle myocardium morphology	0.00111	0.0315	21	983	Mouse	Atp2a2,Daam1,Egln1,Erbb4,Flrt2,Foxp1,Gjc1,Hspb7,Itgav,Klf3,Map3k3,Map3k7,Megf8,Nipbl,Nox4,Por,Sptbn1,Tead1,Wnk1,Xbp1,Xirp1
MP:0001405	impaired coordination	0.00112	0.0316	62	983	Mouse	Abcd2,Abl2,Acer3,Adam11,Alpl,Anp32e,Arhgap32,Atxn1,Atxn7,B3galt2,Braf,Cacna1c,Cdkl5,Chd6,Cmah,Cpeb4,Crebbp,Csf1r,Ctnnb1,Dmd,Dnase1l1,Dnmt3a,Dst,Dtna,Ercc6,Fat1,Fgf14,Fgfr1,Fzd5,Gas7,Hfe,Hipk2,Itgav,Kalrn,Klf9,Lmna,Lnpep,Lrp1,Mbd5,Mecp2,Nes,Nf2,Nr2c2,Plcb4,Prex2,Prnp,Ptpn4,Ptprz1,Qk,Rora,Rpl27a,Rps6ka3,Sbf2,Smpd1,Sp4,Sun1,Syne1,Tardbp,Timm23,Ube3a,Wisp1,Zfp106
MP:0004810	decreased hematopoietic stem cell number	0.00114	0.032	16	983	Mouse	Bcr,Cdk6,Crebbp,Csf3r,Cxcl12,Ep400,Foxo3,Il6st,Kat6a,Kmt2a,Msi2,Pbx1,Prkdc,Ptpn11,Rpl27a,Rps27l
MP:0002442	abnormal leukocyte physiology	0.00117	0.0325	167	983	Mouse	Abca1,Abcc1,Acaca,Adcy9,Ahnak,Akap13,Angptl2,Anpep,Arhgef1,Arhgef12,Arhgef2,Arhgef5,Ash1l,Bcl2l11,Bclaf1,Bcr,Birc6,Bmpr1a,Bmpr2,Braf,Bsg,C3ar1,Cabin1,Cbl,Cbx5,Ccbe1,Ccl11,Ccr2,Cd200,Cd244a,Cd2ap,Cd300a,Cd300c2,Cd38,Cd93,Cdh5,Cdk6,Cflar,Chd4,Clec12a,Cmah,Cmklr1,Crtc1,Csf3r,Cspg4,Cxcl12,Dclre1c,Dyrk1a,Ecm1,Eif2ak2,Entpd1,Erap1,Ets1,Flt1,Foxo1,Foxo3,Foxp1,Gab2,Gabpb2,Galnt1,Gbp5,Git2,Glg1,Gon4l,Havc…
MP:0001258	decreased body length	0.00124	0.0346	49	983	Mouse	Adgrf5,Arhgap23,Cbfa2t2,Cbx5,Cdc42,Chd2,Col2a1,Dnajc10,Dse,Dyrk1a,Evc,Evc2,Fto,Hcfc1,Hfe,Hspg2,Igf1,Il6st,Itgb1,Kmt5b,Kras,Lepr,Lfng,Mysm1,Nacad,Nr3c1,Ntrk2,Pappa,Pfn1,Pmm2,Ppp1r9b,Ppp2r3a,Ptpn11,Rhobtb3,Rps6ka3,Setd2,Slc20a2,Slc38a10,Sod2,Thbs1,Thra,Tmem106b,Tppp,Traf6,Ttc28,Twsg1,Usp24,Usp42,Zbtb20
MP:0009890	cleft secondary palate	0.0013	0.0356	26	983	Mouse	Arhgap29,Col2a1,Crebbp,Crk,Ctnnb1,Ext1,Fgfr1,Foxn3,Golgb1,Ift172,Inhba,Irf6,Itgav,Kat6a,Kcnj2,Luzp1,Map3k7,Mnt,Ncor2,Pbx1,Pdgfra,Prrx1,Sh3pxd2a,Sox5,Tshz1,Zeb1
MP:0000288	abnormal pericardium morphology	0.0013	0.0356	37	983	Mouse	Akap13,Bmpr1a,Braf,Cdh5,Cflar,Daam1,Ddx3x,Ece1,F2r,Flrt2,Fn1,Foxo1,Gjc1,Gli3,Hspg2,Itga4,Itgb1,Kmt2b,Lrp1,Mib1,Myocd,Naca,Notch2,Ptpn11,Ptprb,Ptprj,Qk,Rtel1,Rttn,Ryr2,Setd2,Tmsb4x,Ubr5,Vcam1,Wnk1,Xbp1,Xiap
MP:0010911	abnormal pulmonary acinus morphology	0.0013	0.0356	37	983	Mouse	Abca1,Adgrf5,Aff4,Atxn1l,Bmpr1a,Bmpr2,Col27a1,Col2a1,Crebbp,Cux1,Fubp1,G3bp1,Grb10,Grem1,Igf1,Itga3,Kmt5b,Kras,Lama5,Lfng,Lpl,Lrrk2,Lyz2,Ndst1,Nr3c1,Pcyt1a,Pdgfa,Pdgfra,Pkn2,Podxl,Ptges3,Smpd1,Ssr3,Tie1,Tmtc3,Trip11,Trps1
MP:0010038	abnormal placenta physiology	0.00141	0.0383	27	983	Mouse	Abca1,Arnt,Ash1l,Ddx3x,Epb41l5,Ern1,F2r,Fn1,Itga4,Itgb1,Krit1,Mecp2,Mib1,Ncoa2,Pdgfra,Plk2,Rtel1,Setd2,Slk,Smad5,Ssr3,Sumo2,Supt20,Tjp1,Ubr5,Vcam1,Zfp568
MP:0001732	postnatal growth retardation	0.00141	0.0383	114	983	Mouse	Acox1,Alkbh1,Ash1l,Atp8b1,Atxn1,Braf,Cd2ap,Cdc42,Cep63,Chd2,Col11a2,Crebbp,Crk,Csf1r,Cux1,Dnmt1,Dnmt3a,Dst,Dyrk1a,Egln1,Enpp1,Ercc4,Ercc6,Ets1,Evc2,Foxn3,Fryl,Fto,Gk,Gpam,Gucy1b1,Igf1,Igf1r,Ikbkg,Insr,Irf2bp2,Itgb1,Itpkb,Jam3,Kalrn,Kat6b,Kdm5b,Kit,Klf3,Kmt2a,Kmt2c,Kras,Large1,Ldb3,Lmf1,Lmna,Lpar1,Lrp1,Lrp6,Ltbp3,Map3k7,Mbd5,Mecp2,Mysm1,Naca,Ncoa3,Nfat5,Nfix,Ngf,Ninj1,Nipbl,Ntrk2,Pdgfa,Pex5,Picalm…
MP:0002111	abnormal tail morphology	0.00143	0.0387	53	983	Mouse	Acan,Aebp2,Angptl2,Bmpr1a,Brwd3,Cbl,Col1a2,Col2a1,Col4a2,Csf1r,Dse,Dst,Epha1,F2r,Fat4,Fgfr1,Fn1,Foxo1,Fzd7,G3bp1,Glg1,Hfe,Inka2,Irf6,Kat6a,Kdm7a,Kit,Kmt2a,Krit1,Lama5,Lepr,Lfng,Lmna,Lrp6,Map3k7,Med12,Mysm1,Pfas,Por,Prnp,Qk,Rpl27a,Sfrp2,Smurf2,Spred1,Tceal9,Tcf4,Thbs2,Thra,Traf6,Twsg1,Zeb1,Zhx3
MP:0001819	abnormal immune cell physiology	0.00148	0.0398	169	983	Mouse	Abca1,Abcc1,Acaca,Adcy9,Ahnak,Akap13,Angptl2,Anpep,Arhgef1,Arhgef12,Arhgef2,Arhgef5,Ash1l,Bcl2l11,Bclaf1,Bcr,Birc6,Bmpr1a,Bmpr2,Braf,Bsg,C3ar1,Cabin1,Cbl,Cbx5,Ccbe1,Ccl11,Ccr2,Cd200,Cd244a,Cd2ap,Cd300a,Cd300c2,Cd38,Cd93,Cdh5,Cdk6,Cflar,Chd4,Clec12a,Cmah,Cmklr1,Crtc1,Csf1r,Csf3r,Cspg4,Cxcl12,Dclre1c,Dyrk1a,Ecm1,Eif2ak2,Entpd1,Erap1,Ets1,Flt1,Foxo1,Foxo3,Foxp1,Gab2,Gabpb2,Galnt1,Gbp5,Git2,Glg1,Gon4…
MP:0012382	abnormal blood cell physiology	0.00149	0.0398	179	983	Mouse	Abca1,Abcc1,Acaca,Adcy9,Ago2,Ahnak,Akap13,Angptl2,Anpep,Arhgef1,Arhgef12,Arhgef2,Arhgef5,Ash1l,Bcl2l11,Bclaf1,Bcr,Birc6,Bmpr1a,Bmpr2,Braf,Bsg,C3ar1,Cabin1,Cbl,Cbx5,Ccbe1,Ccl11,Ccr2,Cd200,Cd244a,Cd2ap,Cd300a,Cd300c2,Cd38,Cd93,Cdc42,Cdh5,Cdk6,Cflar,Chd4,Clec12a,Cmah,Cmklr1,Crtc1,Csf3r,Cspg4,Cxcl12,Dclre1c,Dyrk1a,Ecm1,Eif2ak2,Entpd1,Erap1,Ets1,Fech,Flt1,Foxo1,Foxo3,Foxp1,Gab2,Gabpb2,Galnt1,Gbp5,Git2…
MP:0011181	increased hematopoietic cell number	0.00149	0.0398	149	983	Mouse	Abraxas2,Acbd5,Ace,Adgrf5,Ago2,Akap13,Anpep,Arap2,Arhgef1,Atp11a,Bcl2l11,Bclaf1,Bcr,Bnip2,C4b,Cbl,Ccr2,Cd200,Cd300a,Cdh5,Cdk6,Cflar,Chd2,Chd4,Cmklr1,Crebbp,Csf1r,Ctnnb1,Cxcl12,Dclre1c,Dido1,Dlg3,Egln1,Elk4,Entpd1,Entpd7,Epb41,Ets1,Fam110b,Fam160a1,Fam210a,Fech,Fgf2,Flt1,Foxo1,Foxo3,Galnt1,Gdi2,Glg1,Hr,Hsd17b11,Hspg2,Il15ra,Il4ra,Il6st,Irf2bp2,Itfg2,Itga4,Itgav,Itgb5,Itpkb,Jam3,Kdm4c,Kdm5a,Kdm7a,K…
MP:0000260	abnormal angiogenesis	0.0015	0.0398	56	983	Mouse	Adcy9,Angpt2,Arid2,Arnt,Atp11a,Atp2a2,Birc6,Bmpr1a,Braf,Brd2,C1galt1,Cacna1c,Cdh5,Crebbp,Ctnnb1,Cxcl12,Dusp3,Ece1,Egln1,Flt1,Fn1,Foxo1,Gli3,Hspb7,Hspg2,Itgb4,Kat6a,Krit1,Map3k3,Map3k7,Mib1,Mkl2,Myh9,Myocd,Ndst1,Pam,Pfn1,Pld1,Ptprb,Ptprj,Qk,Rnf213,Rora,Sdc4,Setd5,Sh3pxd2a,Slco2a1,Smad5,Thbs1,Thbs2,Tie1,Tjp1,Traf6,Ubr5,Wnk1,Xbp1
MP:0005018	decreased T cell number	0.00151	0.04	89	983	Mouse	Acaca,Aff1,Arhgef1,Bcl2l11,Bclaf1,Bnip2,Braf,Bsg,Cbl,Ccl25,Ccr2,Cd5l,Cdk6,Cdkal1,Cflar,Chd4,Chd9,Crebbp,Ctnnb1,Cux1,Cycs,Dclre1c,Ddx42,Dnmt3a,Dyrk1a,Elk4,Ets1,Fcrls,Foxo1,Foxp1,Gabpa,Galnt1,Gon4l,Havcr2,Hivep2,Hr,Ikbkg,Il15ra,Il1r1,Il4ra,Il6st,Itfg2,Itga4,Itgav,Itpkb,Kat6a,Kdm7a,Kit,Klf13,Kras,Lepr,Map3k3,Map3k7,March1,Mavs,Msi2,Myh9,Nfatc3,Nr3c1,Pbx1,Picalm,Pik3cd,Pip4k2c,Plcg1,Polg,Ppp4r2,Prkdc…
MP:0013809	absent pectinate muscle	0.00153	0.04	3	983	Mouse	Atp11a,Brd2,Setd5
MP:0010588	conotruncal ridge hyperplasia	0.00153	0.04	3	983	Mouse	Foxp1,Hspg2,Kras
MP:0001788	periorbital edema	0.00153	0.04	3	983	Mouse	Map3k7,Nfatc3,Ptpn14
MP:0011117	abnormal susceptibility to weight gain	0.00154	0.04	41	983	Mouse	Acot11,Adipor1,Adrb3,Ahnak,Alms1,Cbl,Clock,Crebbp,Cspg4,Foxo1,Fto,Gpd2,Grb10,Il1r1,Lamp2,Lcn2,Lepr,Lnpep,Lrp1,Lrp6,Mecp2,Med13,Mgat4a,Ncoa3,Ncor1,Ncor2,Noct,Nr2c2,Ntrk2,Osmr,Pnrc2,Prkab2,Ptpn11,Ranbp2,Rictor,Rock2,Tbl1xr1,Tmem18,Trp53inp1,Wrn,Zeb1
MP:0001712	abnormal placenta development	0.00159	0.0414	24	983	Mouse	Abca1,Arnt,Ash1l,Ddx3x,Epb41l5,F2r,Fn1,Itga4,Itgb1,Krit1,Mib1,Ncoa2,Pdgfra,Plk2,Rtel1,Setd2,Slk,Smad5,Sumo2,Supt20,Tjp1,Ubr5,Vcam1,Zfp568
MP:0012176	abnormal head development	0.00168	0.0434	12	983	Mouse	Bmpr1a,Btaf1,Ctnnb1,Fgfr1,Fn1,Hectd1,Mau2,Med12,Nipbl,Pkn2,Pmm2,Setd2
MP:0005559	increased circulating glucose level	0.00169	0.0434	51	983	Mouse	Acaca,Adgrf5,Adipor1,Alms1,Ap3s1,Cacna1c,Cdkal1,Clock,Col18a1,Cpe,Crebbp,Crtc1,Daam1,Dnajc3,Efna5,Foxo1,Fto,Gpr39,Gstt1,Huwe1,Igf1r,Ildr2,Insr,Kmt2b,Lbp,Lcn2,Lepr,Mgat4a,Naa40,Ncoa3,Ncor2,Noct,Osmr,Prex2,Prkdc,Ptpn11,Pttg1,Rictor,Rps6ka3,Rps6kb1,Senp1,Sidt2,Smc6,Steap4,Tardbp,Thra,Trp53inp1,Tusc5,Usp47,Vwa8,Wrn
MP:0000706	small thymus	0.00171	0.0436	49	983	Mouse	Aff1,Arhgap5,Braf,Brd2,Bsg,Cbl,Cd2ap,Cdk6,Chd4,Col4a2,Crebbp,Cux1,Cycs,Dclre1c,Dock1,Ets1,Fubp1,Gabpa,Hr,Ikbkg,Il6st,Kat6a,Lama5,Lmna,Megf8,Msi2,Ncor1,Ndst1,Nfat5,Nfatc3,Nr3c1,Pbx1,Pdgfra,Prkdc,Prnp,Rictor,Rora,Rpl27a,Rps27l,Setd5,Sp4,Srsf2,Tasp1,Traf6,Twsg1,Wrn,Wwox,Zbtb1,Zeb1
MP:0002932	abnormal joint morphology	0.00172	0.0436	45	983	Mouse	Acan,Antxr1,Ash1l,Atp11a,Bmpr1a,Bmpr2,Brd2,Cbx5,Cdc42,Col1a2,Col2a1,Col4a2,Crebbp,Ctnnb1,Enpp1,Fgfr1,Gli3,Hspg2,Il6st,Kat6b,Kmt2a,Lfng,Lmna,Lrp6,Ltbp3,Nacc1,Nfix,Otud7b,Pdgfra,Rarg,Rhobtb3,Sel1l,Setd5,Sh3pxd2a,Sh3pxd2b,Slc20a2,Slc26a2,Smoc1,Tent5c,Thra,Tmem63a,Tshz1,Ttc28,Xbp1,Zeb1
MP:0001634	internal hemorrhage	0.00172	0.0436	47	983	Mouse	Abca1,Adcy9,Alkbh1,Alpl,Birc6,Bmpr1a,Braf,C1galt1,Cacna1c,Ccr2,Cdc42,Chd2,Col18a1,Col2a1,Col4a1,Crebbp,Ctnnb1,Cxcl12,Cycs,F2r,F7,G3bp1,Hspg2,Ikbkg,Itga4,Itgav,Jam3,Lmf1,Lrp1,Lyz2,Mkl2,Naca,Notch2,Pcnt,Pdgfa,Por,Rtel1,Smg1,Sod2,Sufu,Thbs1,Tln1,Tmsb4x,Twsg1,Wnk1,Xiap,Zbtb20
MP:0004956	decreased thymus weight	0.00177	0.0449	11	983	Mouse	Aff1,Braf,Bsg,Dclre1c,Hr,Kat6a,Rictor,Rps27l,Srsf2,Tasp1,Wwox
MP:0004111	abnormal coronary artery morphology	0.00181	0.0455	10	983	Mouse	Arid2,Braf,Dync2h1,Enpp1,Hectd1,Hexim1,Hspg2,Lrp1,Megf8,Sufu
MP:0008533	abnormal anterior visceral endoderm morphology	0.00181	0.0455	7	983	Mouse	Bptf,Cnbp,Ino80,Med12,Pofut2,Pou2f1,Qk
MP:0001764	abnormal homeostasis	0.00184	0.0459	443	983	Mouse	Abca1,Abcc1,Abcd2,Abraxas2,Acaca,Acan,Acbd3,Ace,Acer3,Acot11,Acox1,Acvr2a,Adcy6,Adcy9,Adgrf5,Adipor1,Ago2,Agtrap,Ahcyl1,Ahnak,Akap13,Alms1,Alpl,Angpt2,Angptl2,Anxa6,Ap3s1,Apobec1,Arid2,Arnt,Asah2,Ascc3,Ash1l,Atad2b,Atf6,Atp11a,Atp2a2,Atp8b1,Atxn1l,Bcl2l11,Bclaf1,Bcr,Birc6,Bmpr1a,Bmpr2,Braf,Brd2,Btaf1,C1galt1,C1qa,C2cd3,C3ar1,C4b,Cacfd1,Cacna1c,Cacna1d,Cacna2d3,Caskin2,Cbl,Ccbe1,Ccl9,Ccni,Ccr2,Cd2…
MP:0002972	abnormal cardiac muscle contractility	0.00186	0.0463	47	983	Mouse	Adcy6,Akap13,Anxa6,Arrb1,Atp1a2,Atp2a2,Bmpr1a,Braf,Cacna1c,Cacna2d1,Camk2d,Cdc42,Clu,Dmd,Egln1,Erbb4,Fgf2,Gjc1,Igf1,Itgb1,Kdm4a,Klf3,Kras,Lamp2,Ldb3,Lepr,Lmna,Lpl,Lrp1,Map3k1,Myocd,Ngf,Nox4,Nr3c1,Pdha1,Pdlim5,Ptcd1,Ptpn11,Rrad,Ryr2,Sfrp2,Smad5,Sod2,Srsf2,Thra,Xiap,Xirp1
MP:0000208	decreased hematocrit	0.0019	0.0471	33	983	Mouse	Ace,Adgrf5,Ago2,Arnt,Ccbe1,Chd2,Col4a1,Col4a2,Elk4,Epb41,Fech,Fgfrl1,Inhba,Itgb1,Kit,Kras,Mtus1,Mysm1,Ncor1,Osmr,Pbx1,Picalm,Ppp1r15b,Ric1,Rock1,Slc4a4,Sod2,Sptb,Tln1,Tns2,Ttc28,Uevld,Wnk1
MP:0000547	short limbs	0.00194	0.0481	22	983	Mouse	Acan,Cdc42,Chsy1,Col27a1,Col2a1,Creb3l2,Csf1r,Ctnnb1,Cyp26b1,Evc,Evc2,Gli3,Hspg2,Ift172,Il6st,Irf6,Lrp6,Prrx1,Thra,Tnfrsf11a,Trip11,Zeb1
MP:0005367	renal/urinary system phenotype	0.00197	0.0481	148	983	Mouse	Abca1,Acbd3,Ace,Adcy6,Agtrap,Alms1,Ash1l,Atad2b,Atp2a2,Bcl2l11,Bcr,Bmpr2,Braf,Brd2,C1galt1,C1qa,C4b,Cacna2d1,Ccni,Ccr2,Cd2ap,Cdc42,Cdc73,Cfh,Chd2,Clcn4,Clcn5,Clu,Col18a1,Col2a1,Col4a1,Cplane1,Ctnnb1,Cux1,Dcn,Dnajc3,Dock1,Dst,Dync2h1,Dzip1l,Efna5,Egln1,Enpp1,Entpd1,Epb41,Ephb2,Erap1,Ermp1,F2r,Fat1,Fat4,Fgfrl1,Fh1,Foxo3,Frs2,Fryl,Fto,Gfra1,Gli3,Greb1l,Grem1,Hipk2,Hr,Huwe1,Ift172,Igf1,Il1r1,Inhba,In…
MP:0010551	abnormal coronary vessel morphology	0.00198	0.0481	16	983	Mouse	Arid2,Atp11a,Braf,Dync2h1,Egln1,Enpp1,Hectd1,Hexim1,Hspg2,Itga4,Lrp1,Megf8,Setd5,Sptbn1,Sufu,Traf6
MP:0001879	abnormal lymphatic vessel morphology	0.00198	0.0481	16	983	Mouse	Angpt2,Brd2,Ccbe1,Cdh5,Cyp26b1,Fat1,Nfat5,Plxna1,Plxna2,Ptpn14,Sema3g,Setd5,Sh3pxd2a,Tent5c,Tie1,Zbtb46
MP:0002192	hydrops fetalis	0.00198	0.0481	16	983	Mouse	Cop1,Cplane1,Crk,Dock1,Ece1,Eya4,Foxp1,Igf1r,Pcnt,Pdgfra,Podxl,Ptpn11,Rictor,Rock1,Zeb1,Zfp260
MP:0003795	abnormal bone structure	0.00203	0.0492	110	983	Mouse	Acan,Adgrf5,Ahcyl1,Alpl,Atp11a,Atp2a2,Bmpr1a,C3ar1,Ccr2,Chd2,Chsy1,Col1a2,Col2a1,Cpeb4,Csf1r,Ctnnb1,Cux1,Cyb5d1,Dcn,Elk4,Enpp1,Erlin2,Evc2,Ext1,F2r,F7,Fam210a,Fgf2,Fgfr1,Foxo3,Frs2,Fto,Gab2,Glg1,Gli3,Grem1,Grem2,Gtf2a1,Hspg2,Igf1,Igf1r,Il6st,Jam2,Large1,Lepr,Leprot,Lifr,Limd1,Lmna,Lpar1,Lrp6,Ltbp3,Map3k1,Mindy1,Mlec,Mysm1,Naca,Ncor2,Nf2,Nfix,Notch2,Nr3c1,Osbpl3,P2rx7,Pfas,Pfn1,Plxna1,Polg,Ppp1r9b…
MP:0000166	abnormal chondrocyte morphology	0.00206	0.0495	18	983	Mouse	Acan,Chsy1,Col11a2,Col27a1,Col2a1,Creb3l2,Ctnnb1,Cyp26b1,Enpp1,Evc,Hspg2,Igf1,Itgb1,Pbx1,Pfn1,Slc39a14,Trip11,Trps1
MP:0005592	abnormal vascular smooth muscle morphology	0.00206	0.0495	18	983	Mouse	Bmpr1a,Col3a1,Crk,Cxcl12,Enpp1,Fn1,Lmna,Lrp1,Map3k7,Mkl2,Myocd,Notch2,Ptprj,Rapgef1,Rock1,Smad5,Thbs1,Tmsb4x
MP:0002421	abnormal cell-mediated immunity	0.00207	0.0496	169	983	Mouse	Abca1,Abcc1,Acaca,Adcy9,Ahnak,Akap13,Angptl2,Anpep,Arhgef1,Arhgef12,Arhgef2,Arhgef5,Ash1l,Bcl2l11,Bclaf1,Bcr,Birc6,Bmpr1a,Bmpr2,Braf,Bsg,C3ar1,Cabin1,Cbl,Cbx5,Ccbe1,Ccl11,Ccr2,Cd200,Cd244a,Cd2ap,Cd300a,Cd300c2,Cd38,Cd93,Cdh5,Cdk6,Cflar,Chd4,Clec12a,Cmah,Cmklr1,Crtc1,Csf1r,Csf3r,Cspg4,Cxcl12,Dclre1c,Dyrk1a,Ecm1,Eif2ak2,Entpd1,Erap1,Ets1,Flt1,Foxo1,Foxo3,Foxp1,Gab2,Gabpb2,Galnt1,Gbp5,Git2,Glg1,Gon4…
MP:0001175	abnormal lung morphology	0.0021	0.0501	77	983	Mouse	Abca1,Acan,Adcy9,Adgrf5,Aff4,Atxn1l,Bclaf1,Bmpr1a,Bmpr2,Brd2,Cdc73,Chd2,Cmklr1,Col27a1,Col2a1,Col3a1,Col4a2,Cplane1,Creb1,Crebbp,Ctnnb1,Cux1,Dync2h1,Egln1,Entpd1,Fat4,Fubp1,G3bp1,Gli3,Grb10,Greb1l,Grem1,Gucy1a1,Igf1,Igf1r,Il4ra,Itga3,Klf3,Kmt5b,Kras,Lama5,Lfng,Lpl,Lrrk2,Lyz2,Megf8,Ndst1,Nox4,Nr3c1,Pam,Pbrm1,Pbx1,Pcnt,Pcyt1a,Pdgfa,Pdgfra,Pkn2,Podxl,Por,Prrx1,Ptges3,Ptpn11,Setd7,Sh3pxd2a,Smpd1,Ssr3…
MP:0001622	abnormal vasculogenesis	0.00212	0.0503	12	983	Mouse	Cdh5,Crebbp,Ctnnb1,Dock1,Fn1,Foxo1,Pbx1,Pdgfra,Plcg1,Ptprb,Qk,Smad5
MP:0011103	embryonic lethality at implantation, incomplete penetrance	0.00217	0.0513	4	983	Mouse	Bsg,Ptpn11,Rock1,Smg6
MP:0006411	upturned snout	0.00217	0.0513	4	983	Mouse	Mau2,Nipbl,Pfas,Vps54
MP:0011088	neonatal lethality, incomplete penetrance	0.00218	0.0513	46	983	Mouse	Aff4,Atp2a2,Atxn1l,Bmpr1a,Cbl,Cdc42,Cnbp,Col2a1,Cpeb4,Cux1,Daam1,F7,Fat1,Gfra1,Gja5,Gprc5b,Gtf2a1,Gucy1b1,Igf1,Irf6,Itgb1,Kdm5b,Kit,Klf3,Ldb3,Lpar1,Lrp6,Mnt,Notch2,Nr3c1,Ntrk2,Pcyt1a,Pdgfra,Raph1,Sh3pxd2a,Sox6,Sptb,Syne1,Tasp1,Tet2,Tnrc6b,Trio,Tshz1,Twsg1,Ube2w,Zfp148
MP:0004193	abnormal kidney papilla morphology	0.0022	0.0515	8	983	Mouse	Ace,Cdc42,Col4a1,Lepr,Mmp17,Nfat5,Notch2,Tjp1
MP:0006346	small pharyngeal arch	0.00227	0.0529	11	983	Mouse	Akap13,Cdh5,Ctnnb1,Fgfr1,Foxo1,Itgav,Itgb1,Rere,Setd2,Twsg1,Ubr5
MP:0002824	abnormal chorioallantoic fusion	0.00235	0.0543	16	983	Mouse	Ddx3x,Epb41l5,Fn1,Itga4,Itgb1,Krit1,Mib1,Rtel1,Setd2,Smad5,Sumo2,Supt20,Tjp1,Ubr5,Vcam1,Zfp568
MP:0008083	decreased single-positive T cell number	0.00235	0.0543	16	983	Mouse	Aff1,Bsg,Cbl,Cflar,Dclre1c,Elk4,Hivep2,Ikbkg,Il15ra,Map3k3,Map3k7,Nr3c1,Prkdc,Rictor,Sept9,Stk17b
MP:0003420	delayed intramembranous bone ossification	0.00236	0.0543	9	983	Mouse	Alkbh1,Ctnnb1,Fgfrl1,Foxn3,Kat6b,Lrp6,Nipbl,Stag1,Thra
MP:0000930	wavy neural tube	0.00236	0.0543	10	983	Mouse	Ago2,Ep400,Gli3,Itgb1,Map3k7,Pdgfra,Qk,Shroom3,Trim28,Xbp1
MP:0008273	abnormal intramembranous bone ossification	0.00238	0.0545	13	983	Mouse	Alkbh1,Cdc42,Ctnnb1,Fgfr1,Fgfrl1,Foxn3,Kat6b,Lrp6,Nipbl,Pdgfra,Stag1,Thra,Twsg1
MP:0001787	pericardial edema	0.00239	0.0546	17	983	Mouse	Ago2,C2cd3,Cflar,Ctnnb1,Flrt2,Itgav,Kmt2d,Kras,Map3k7,Mib1,Mkl2,Naca,Notch2,Pdgfra,Pkn2,Por,Wnk1
MP:0001722	pale yolk sac	0.0024	0.0547	18	983	Mouse	Bmpr1a,Crebbp,Ctnnb1,Dlc1,Dnmt1,Egln1,Fzd5,Kras,Krit1,Mkl2,Myh9,Myocd,Ptprb,Smad5,Sufu,Tead1,Ubr5,Wnk1
MP:0003179	thrombocytopenia	0.00247	0.0559	29	983	Mouse	Abca1,Arrb1,Bcl2l11,C1galt1,Cdc42,Cfh,Egln1,Entpd1,Fancc,Foxo3,Il6st,Kmt2a,Kras,Lamc3,Lcn2,Lepr,Mtus1,Myh9,Ncoa3,Osmr,Prkdc,Pttg1,Rpl27a,Slc38a10,Smurf2,Tet2,Tln1,Twsg1,Usp42
MP:0002420	abnormal adaptive immunity	0.00248	0.0559	171	983	Mouse	Abca1,Abcc1,Acaca,Adcy9,Ahnak,Akap13,Angptl2,Anpep,Arhgef1,Arhgef12,Arhgef2,Arhgef5,Ash1l,Bcl2l11,Bclaf1,Bcr,Birc6,Bmpr1a,Bmpr2,Braf,Bsg,C3ar1,Cabin1,Cbl,Cbx5,Ccbe1,Ccl11,Ccr2,Cd200,Cd244a,Cd2ap,Cd300a,Cd300c2,Cd38,Cd93,Cdh5,Cdk6,Cfh,Cflar,Chd4,Clec12a,Cmah,Cmklr1,Crtc1,Csf1r,Csf3r,Cspg4,Cxcl12,Dclre1c,Dyrk1a,Ecm1,Eif2ak2,Entpd1,Erap1,Ets1,Flt1,Foxo1,Foxo3,Foxp1,Gab2,Gabpb2,Galnt1,Gbp5,Git2,Glg1,…
MP:0004087	abnormal muscle fiber morphology	0.00248	0.0559	59	983	Mouse	Akap13,Braf,Cacna1c,Camk2d,Chd2,Clu,Col6a3,Daam1,Dmd,Dock1,Dst,Dtna,Egln1,Erbb4,Fat1,Fgfr1,Foxp1,Gas7,H6pd,Hexim1,Hspb7,Hspg2,Itgb1,Kalrn,Kdm4a,Kras,Large1,Ldb3,Lepr,Lmna,Lrp1,Map3k7,Mbnl1,Mdm4,Myocd,Myof,Ncoa3,Ncor1,Nfatc3,Ngf,Nr3c1,Pdha1,Pdlim5,Plec,Pmm2,Polg,Prkab2,Prnp,Ptpn11,Rps6kb1,Ryr2,Sod2,Sptbn1,Syne1,Thbs1,Trio,Vps54,Xirp1,Zfp106
MP:0000929	open neural tube	0.00266	0.0596	31	983	Mouse	Ago2,Brd1,Brd2,Crebbp,Dlc1,Dnmt1,F2r,Fgfr1,Gpr161,Ift172,Itgb1,Kmt2b,Lrp6,Map3k7,Marcks,Med12,Pdgfra,Pkn2,Prrx1,Ptpn11,Qk,Rere,Setd2,Shroom3,Sufu,Supt20,Trim28,Zeb1,Zeb2,Zfp148,Zfp568
MP:0000274	enlarged heart	0.0027	0.06	76	983	Mouse	Abca1,Acan,Ace,Ago2,Akap13,Arhgef1,Atp1a2,Atp2a2,Bmpr2,Braf,Brd2,Cacna1c,Cd2ap,Chd2,Csf3r,Ctdsp2,Dlc1,Dmd,Ece1,Egln1,Emc8,Epb41l5,Erbb4,F2r,Fgfr1,Fubp1,Gjc1,Gucy1a1,Huwe1,Igf1r,Ino80,Itgav,Klf3,Kras,Lama5,Lamp2,Lcn2,Ldb3,Lepr,Lmna,Lnpep,Lrp1,Map3k7,Mdm4,Mecp2,Mtus1,Myo6,Myocd,Ncor1,Ndst1,Nox4,Nr3c1,Pdgfa,Pdha1,Pdlim5,Pkn2,Polg,Ptcd1,Ptpn11,Ptprb,Qk,Ric1,Rictor,Rrad,Ryr2,Slc25a4,Smurf2,Sod2,Sptb,S…
MP:0003662	abnormal long bone epiphyseal plate proliferative zone	0.0027	0.06	15	983	Mouse	Col27a1,Col2a1,Creb3l2,Csf1r,Evc,Evc2,Ext1,Glg1,Hspg2,Igf1,Ltbp3,Nfix,Pfn1,Thra,Twsg1
MP:0000462	abnormal digestive system morphology	0.0027	0.06	125	983	Mouse	Acan,Acvr2a,Adcy9,Aebp2,Alpl,Angpt2,Arhgap29,Atp2a2,Bcr,Bmpr1a,Braf,C4b,Cbfa2t2,Cdc42,Cdc73,Col2a1,Col3a1,Col4a2,Cplane1,Cramp1l,Creb3l2,Crebbp,Crk,Ctnnb1,Dcn,Dmd,Dst,Dync2h1,Dzip1l,Ece1,Efna5,Epb41l5,Ephb2,Ermp1,Ext1,Eya4,Fat4,Fgfr1,Foxn3,Fzd5,Gfra1,Gfra2,Glg1,Gli3,Golgb1,Gon4l,Gpr39,Greb1l,Gucy1b1,Hr,Hspg2,Ift172,Ikbkg,Il4ra,Il6st,Inhba,Iqgap1,Irf6,Itgav,Itgb1,Itgb4,Itpkb,Jam3,Kat6a,Kcnj2,Kit,K…
MP:0001577	anemia	0.00273	0.0603	47	983	Mouse	Ago2,Brd1,C1galt1,C1qbp,Ccbe1,Cflar,Col4a1,Cop1,Crebbp,Dido1,Ep400,Epb41,Fech,Fgfrl1,Fn1,Foxo3,Fubp1,Hfe,Il6st,Inhba,Itgb1,Kit,Klf3,Kmt2a,Kras,Mtus1,Ncor1,Nfat5,Osmr,Pbx1,Picalm,Polg,Pou2f1,Ptpn11,Rpl27a,Senp1,Slc4a4,Sod2,Sptb,Srsf2,Tent5c,Tet2,Tmod3,Tnfrsf11a,Traf6,Wwox,Xbp1
MP:0002079	increased circulating insulin level	0.00273	0.0603	32	983	Mouse	Acaca,Adipor1,Alms1,Brd2,Cpe,Crebbp,Crtc1,Dnajc3,Foxo1,Fto,Grb10,Igf1,Il1r1,Insr,Kmt2b,Lcn2,Lepr,Lmna,Ntrk2,Osmr,Pde3b,Pdha1,Prkab2,Ptpn11,Rictor,Rock1,Rps6ka3,Thra,Trp53inp1,Tusc5,Wrn,Zeb1
MP:0005317	increased triglyceride level	0.00278	0.061	40	983	Mouse	Abca1,Acot11,Adipor1,Alms1,Brd2,Cacfd1,Cdkal1,Clock,Col18a1,Cpe,Crtc1,Ern1,Foxo1,Fto,Insr,Kmt2b,Lamp2,Lcn2,Lepr,Lmf1,Lmna,Lpl,Lrp6,Mecp2,Mgat4a,Ncoa3,Nr3c1,Osmr,Pcyt1a,Pde3b,Prkab2,Ptcd1,Ptpn11,Rsbn1,Slc38a10,Steap4,Tbl1xr1,Wrn,Xdh,Zeb1
MP:0000717	abnormal lymphocyte cell number	0.0028	0.0612	149	983	Mouse	Acaca,Ace,Aff1,Akap13,Anpep,Arap2,Arhgef1,Atp11a,Bcl2l11,Bclaf1,Bnip2,Braf,Bsg,C3ar1,Cbl,Ccl25,Ccr2,Cd5l,Cdk6,Cdkal1,Cflar,Chd2,Chd4,Chd9,Crebbp,Csf1r,Ctnnb1,Cux1,Cxcl12,Cycs,Dclre1c,Ddx42,Dnmt3a,Dyrk1a,Egln1,Elk4,Entpd1,Entpd7,Ets1,Fam110b,Fam160a1,Fcrls,Foxo1,Foxo3,Foxp1,Fubp1,Gabpa,Galnt1,Gdi2,Git2,Glb1l2,Gon4l,Havcr2,Hivep2,Hr,Hsd17b11,Hspa9,Huwe1,Ikbkg,Il15ra,Il1r1,Il33,Il4ra,Il6st,Itfg2,Itg…
MP:0003762	abnormal immune organ physiology	0.0028	0.0612	27	983	Mouse	Akap13,Bcl2l11,Birc6,Braf,Ccr2,Cdk6,Cflar,Ets1,Foxo1,Hr,Il15ra,Il6st,Itfg2,Itpkb,Klf13,Kras,Lcn2,Map3k7,Mdm4,Ncoa3,Nr3c1,Polg,Prkdc,Ripk1,Rps27l,Setd7,Twsg1
MP:0004134	abnormal chest morphology	0.00286	0.0623	11	983	Mouse	Acan,Col2a1,Creb3l2,Fgfrl1,Hspg2,Lama5,Mbtps1,Nr3c1,Pdgfa,Ptpn11,Sox5
MP:0002078	abnormal glucose homeostasis	0.0029	0.0629	148	983	Mouse	Acaca,Ace,Acot11,Adgrf5,Adipor1,Ago2,Ahnak,Alms1,Angptl2,Ap3s1,Atf6,Braf,Brd2,C1qa,Cacna1c,Cacna1d,Cacna2d3,Caskin2,Cbl,Ccl9,Ccr2,Cd38,Cdkal1,Clcn5,Clock,Cluh,Col18a1,Col1a2,Cpe,Crebbp,Crtc1,Cspg4,Daam1,Dnajc3,Dnajc8,Efna5,Entpd1,Entpd5,Erlin2,Ern1,Foxo1,Foxo3,Fto,Gk,Glb1l2,Gpam,Gpd2,Gpr39,Gprc5b,Grb10,Gstt1,H6pd,Hipk3,Huwe1,Igf1,Igf1r,Ikbkg,Il1r1,Il6st,Ildr2,Inhba,Insr,Klf9,Kmt2b,Lama5,Lamp2,Lbp…
MP:0000458	abnormal mandible morphology	0.00293	0.063	28	983	Mouse	Acvr2a,Alkbh1,Braf,Cnbp,Col2a1,Cplane1,Ctnnb1,Ece1,Fgfr1,Fgfrl1,Foxn3,Grem2,Hspg2,Irf6,Itgb1,Kat6b,Lmna,Map3k7,Mau2,Mbtps1,Mnt,Ndst1,Nipbl,Prrx1,Ptpn11,Sh3pxd2b,Trps1,Zeb1
MP:0005023	abnormal wound healing	0.00294	0.063	31	983	Mouse	Abhd2,Ccr2,Cmah,Cplane1,Daam1,Dlc1,Dst,F2r,Fgf2,Flii,Fn1,Ifi27,Igf1r,Il1r1,Itga3,Itgb1,Lepr,Lpp,Lrp1,Map3k1,Mmp3,Pappa,Pfn1,Plec,Rock1,Sdc1,Sdc4,Sod2,Sorl1,Thbs2,Zeb1
MP:0002706	abnormal kidney size	0.00296	0.063	46	983	Mouse	Ace,Alms1,Brd2,C1galt1,Cdc42,Cdc73,Ctnnb1,Dcn,Dzip1l,Efna5,Erap1,Fat4,Fh1,Frs2,Fryl,Gfra1,Grem1,Hipk2,Igf1,Itga3,Itgb1,Klf3,Lama5,Lcn2,Lepr,Lifr,Lin7c,Lrrk2,Megf8,Nfat5,Notch2,Pbx1,Por,Rhobtb3,Rictor,Sdccag8,Setd5,Slc4a4,Sptb,Sptbn1,Tent5c,Tns1,Tns2,Tsc22d1,Ube2e2,Xdh
MP:0003641	small lung	0.00299	0.063	21	983	Mouse	Acan,Cdc73,Col2a1,Cplane1,Creb1,Crebbp,Fat4,Fubp1,Gli3,Greb1l,Lama5,Pbrm1,Pbx1,Pcnt,Pdgfra,Por,Prrx1,Ptges3,Sufu,Syne1,Trps1
MP:0011898	abnormal platelet cell number	0.00299	0.063	38	983	Mouse	Abca1,Abraxas2,Arrb1,Bcl2l11,C1galt1,Cbl,Cdc42,Cfh,Cflar,Egln1,Entpd1,Fancc,Fgf2,Foxo3,Il6st,Kit,Kmt2a,Kras,Lamc3,Lcn2,Lepr,Mdm4,Mtus1,Myh9,Mysm1,Ncoa3,Osmr,Prkdc,Pttg1,Rpl27a,Slc38a10,Smc6,Smurf2,Tet2,Thbs2,Tln1,Twsg1,Usp42
MP:0005291	abnormal glucose tolerance	0.003	0.063	72	983	Mouse	Acot11,Adgrf5,Adipor1,Ago2,Ahnak,Angptl2,Brd2,Cacna1c,Cacna1d,Cbl,Cd38,Cdkal1,Clock,Cpe,Crebbp,Crtc1,Cspg4,Foxo1,Foxo3,Fto,Glb1l2,Gprc5b,Grb10,Hipk3,Huwe1,Igf1r,Il1r1,Ildr2,Insr,Kmt2b,Lama5,Lamp2,Lcn2,Lepr,Lnpep,Lrp1,Lrp6,Mbd5,Med13,Mgat4a,Mtmr3,Naa40,Ncoa3,Noct,Ntrk2,Nuak1,Osmr,Pacsin2,Pam,Pbx1,Prex2,Prkab2,Ptcd1,Ptpn11,Ranbp2,Rictor,Rock2,Rps6ka3,Rps6kb1,Senp1,Serp1,Sidt2,Slc20a2,Slc25a4,Steap4…
MP:0002657	chondrodystrophy	0.00303	0.063	8	983	Mouse	Bmpr1a,Chsy1,Col27a1,Col2a1,Creb3l2,Hspg2,Itgb1,Mbtps1
MP:0011257	abnormal head fold morphology	0.00306	0.063	6	983	Mouse	Cnbp,Ddx3x,Fgfr1,Kmt2d,Qk,Supt20
MP:0010136	decreased DN4 thymocyte number	0.00306	0.063	6	983	Mouse	Cdk6,Dclre1c,Prnp,Rictor,Sept9,Zbtb1
MP:0010743	delayed suture closure	0.00306	0.063	6	983	Mouse	Alkbh1,Fgfrl1,Foxn3,Kat6b,Lrp6,Thra
MP:0000798	abnormal frontal lobe morphology	0.00309	0.063	5	983	Mouse	Fgf2,Fgfr1,Manba,Mecp2,Sod2
MP:0009951	abnormal olfactory bulb mitral cell layer morphology	0.00309	0.063	5	983	Mouse	Igf1,Ptbp2,Rora,Trio,Zeb1
MP:0001705	abnormal proximal-distal axis patterning	0.00309	0.063	5	983	Mouse	Atad3a,Bptf,Ctnnb1,Cyp26b1,Pbx1
MP:0010132	decreased DN2 thymocyte number	0.00309	0.063	5	983	Mouse	Cdk6,Msi2,Prnp,Rictor,Zbtb1
MP:0010811	decreased type II pneumocyte number	0.00309	0.063	5	983	Mouse	Bmpr1a,Lama5,Lyz2,Pcyt1a,Ptges3
MP:0010771	integument phenotype	0.00309	0.063	208	983	Mouse	Adamts5,Aebp2,Afap1,Aff2,Ago2,Alg1,Angpt2,Angptl2,Anpep,Anxa6,Arf2,Arhgap5,Arnt,Ash1l,Atp1a2,Atp2a2,Bcl2l11,Birc6,Bmpr1a,Braf,Brd1,Cacna1c,Cacna2d3,Cbl,Cbx7,Ccbe1,Cd5l,Cdc42,Cdc73,Cdh5,Cdkal1,Chd2,Ckap4,Clock,Col1a2,Col3a1,Cop1,Cpe,Crebbp,Crebrf,Csf1r,Ctnnb1,Cux1,Cyp26b1,Dcn,Dgkd,Dse,Dst,Ece1,Egln1,Eml1,Enpp1,Erbb4,Erbin,Ercc6,Ereg,Erlin2,Ern1,Ets1,Ext1,Fam110b,Fat1,Fech,Fgfr1,Fn1,Foxo1,Foxo3,Fry…
MP:0000467	abnormal esophagus morphology	0.00309	0.063	14	983	Mouse	Atp2a2,Bmpr1a,Ctnnb1,Dync2h1,Gucy1b1,Ift172,Irf6,Itgb1,Itgb4,Jam3,Kit,Lmna,Pdgfra,Thbs1
MP:0010763	abnormal hematopoietic stem cell physiology	0.00309	0.063	14	983	Mouse	Cdh5,Cdk6,Cxcl12,Fancc,Fubp1,Jam2,Kmt2a,Msi2,Prkdc,Ptpn11,Rpl27a,Rps27l,Srsf2,Tet2
MP:0000163	abnormal cartilage morphology	0.0031	0.063	49	983	Mouse	Acan,Adamts5,Alpl,Atp11a,Bmpr1a,Cdc42,Chsy1,Col11a2,Col27a1,Col2a1,Creb3l2,Csf1r,Ctnnb1,Cyp26b1,Ece1,Enpp1,Evc,Evc2,Ext1,Fgfr1,Fgfrl1,Glg1,Gli3,Hspg2,Igf1,Itgb1,Kat6b,Ltbp3,Mbtps1,Nfix,Ntrk2,Pbx1,Pdgfra,Pfn1,Prrx1,Ptpn11,Rarg,Sh3pxd2a,Slc20a2,Slc26a2,Slc39a14,Slc4a4,Thra,Tnfrsf11a,Trip11,Trps1,Tshz1,Twsg1,Zeb1
MP:0005457	abnormal percent body fat/body weight	0.00315	0.0639	25	983	Mouse	Adipor1,Adrb3,Clock,Col2a1,Cpe,Crebbp,Dnajc3,Foxo1,Fto,Gpam,Gpr39,Il1r1,Kat6b,Klf3,Lamp2,Lepr,Lmna,Naa40,Ncor1,Ncor2,Pde3b,Pfas,Pnrc2,Slc30a7,Zeb1
MP:0000116	abnormal tooth development	0.00321	0.0646	15	983	Mouse	Alkbh1,Alpl,Antxr1,Bmpr1a,Clcn5,Ctnnb1,Gli3,Irf6,Lama5,Lrp6,Ltbp3,Nf2,Rps6ka3,Smg1,Stag1
MP:0005215	abnormal pancreatic islet morphology	0.00321	0.0646	36	983	Mouse	Ago2,Alms1,Brd2,Cacna1d,Cd38,Cdkal1,Clock,Cpe,Crebbp,Cxcl12,Dnajc3,Ehd4,Foxo1,Gpr39,Grb10,Hipk3,Huwe1,Ildr2,Insr,Itgb1,Kmt2b,Kras,Lepr,Mib1,Osmr,Pbx1,Pttg1,Rictor,Rps6kb1,Rpsa,Sel1l,Senp1,Sidt2,Thbs1,Thra,Tle3
MP:0004720	abnormal platelet morphology	0.00322	0.0646	45	983	Mouse	Abca1,Abraxas2,Ahcyl1,Arrb1,Bcl2l11,C1galt1,Cbl,Cdc42,Cfh,Cflar,Chd2,Egln1,Entpd1,Fancc,Fgf2,Foxo3,Il6st,Itgb1,Kit,Kmt2a,Kras,Lamc3,Lcn2,Lepr,Mdm4,Mtus1,Myh9,Mysm1,Ncoa3,Osmr,Pld1,Prkdc,Pttg1,Rab27b,Rest,Rpl27a,Slc38a10,Smc6,Smurf2,Tet2,Thbs2,Tln1,Twsg1,Usp42,Zfp182
MP:0005330	cardiomyopathy	0.00326	0.0648	28	983	Mouse	Abca1,Acan,Camk2d,Chd2,Dmd,Dtna,Egln1,Erbb4,Gja5,Hexim1,Itgb1,Kras,Large1,Ldb3,Lmna,Lrp1,Map3k7,Mdm4,Myo6,Myocd,Ngf,Pdlim5,Ptpn11,Rfx3,Ryr2,Sod2,Srsf2,Xirp1
MP:0002703	abnormal renal tubule morphology	0.00326	0.0648	38	983	Mouse	Ace,Alms1,Bcl2l11,Bcr,C1galt1,Cdc42,Col18a1,Col4a1,Cplane1,Ctnnb1,Dcn,Dzip1l,Fat4,Fh1,Fryl,Itga3,Itgb1,Kirrel,Lama5,Lin7c,Lrrk2,Manba,Nf2,Nfat5,Nfia,Notch2,Pmm2,Sdc4,Sdccag8,Slc4a4,Sod2,Sptb,Tet2,Tjp1,Tns1,Tns2,Wnk1,Xdh
MP:0010559	heart block	0.00326	0.0648	16	983	Mouse	Cacna1d,Dmd,Erbb4,Foxo3,Gja5,Gjc1,Ldb3,Lmna,Map3k7,Mecp2,Ryr2,Setd2,Sp4,Syne1,Thra,Xirp1
MP:0001730	embryonic growth arrest	0.00327	0.0648	42	983	Mouse	Abca1,Acaca,Actr3,Ago2,Bmpr1a,Bmpr2,Bptf,Btaf1,Cdh5,Chd8,Crebbp,Dido1,Dnmt1,Ep400,Epb41l5,Fam208a,Fgfr1,Flii,Flt1,Gjc1,Itgb1,Kmt2b,Kras,Krit1,Mcm9,Pcyt1a,Plcg1,Pno1,Pou2f1,Ptpn11,Ptprb,Qk,Skil,Smg1,Sumo2,Tln1,Trim28,Trpm7,Ubtf,Usp7,Zeb2,Zfp568
MP:0000783	abnormal forebrain morphology	0.00328	0.0648	123	983	Mouse	Abl2,Ago2,Akap13,Arhgap5,Arnt,Atp11a,Atp1a2,Atrx,Atxn1l,Bcl2l11,Bmpr1a,Braf,Brd2,C1qa,Cables1,Cacna1c,Cdc42,Cdkl5,Cep63,Clock,Cnbp,Col18a1,Col2a1,Col4a1,Col4a2,Crebbp,Csf1r,Cspg4,Ctnnb1,Cycs,D430042O09Rik,Dlc1,Dlg3,Dmd,Dyrk1a,Eml1,Enah,Ext1,Fgf2,Fgfr1,Fgfrl1,Frs2,Fubp1,Fzd5,Gli3,Hfe,Hspg2,Huwe1,Hyou1,Ift172,Igf1,Il6st,Itgb1,Itpr3,Jam3,Kalrn,Kat6b,Kit,Kmt2a,Kmt2d,Kras,Lepr,Lrp6,Lrrk2,Manba,March7,…
MP:0001473	reduced long term potentiation	0.00333	0.0657	24	983	Mouse	Atrx,Atxn1,Braf,Creb1,Crebbp,Ctnnb1,Fgf14,Itga3,Kalrn,Lepr,Lrp1,Mecp2,Ncam1,Ntrk2,Prnp,Rock2,Sp4,Spred1,Stx1a,Syngap1,Synpo,Tardbp,Tnc,Ube3a
MP:0000160	kyphosis	0.00338	0.0663	33	983	Mouse	Acan,Atxn1,Atxn1l,Atxn7,Braf,Chd2,Clcn5,Col1a2,Col27a1,Fat1,Fat4,Large1,Lmna,Lrp1,Ltbp3,Mecp2,Nfix,Ntrk2,Pex5,Pmm2,Polg,Prnp,Sh3pxd2b,Slc20a2,Slc26a2,Sprtn,Stag1,Tardbp,Thbs1,Thbs2,Timm23,Tnfrsf11a,Zfp106
MP:0004703	abnormal vertebral column morphology	0.00345	0.0676	98	983	Mouse	Acan,Antxr1,Atxn1,Atxn1l,Atxn7,Bmpr2,Bnip2,Braf,Brd2,Cbx5,Chd2,Clcn5,Col1a2,Col27a1,Col2a1,Col4a2,Cplane1,Crebbp,Dmd,Enpp1,Entpd1,Evc,Ext1,Fat1,Fat4,Fgfr1,Fgfrl1,Foxn3,Glg1,Gli3,Gtf2a1,Hspg2,Inka2,Irf6,Itgb1,Kat6a,Kdm7a,Kmt2a,Kmt5b,Lamc3,Large1,Lfng,Lmna,Lrp1,Lrp6,Ltbp3,Mecp2,Med12,Mysm1,Nacad,Nacc1,Nfix,Ntrk2,Otud7b,Pdgfra,Pex5,Pfn1,Pmm2,Polg,Prnp,Prrx1,Rarg,Rps6ka3,Sel1l,Setd5,Sfrp2,Sh3pxd2a,Sh…
MP:0009165	abnormal endocrine pancreas morphology	0.0035	0.0684	36	983	Mouse	Ago2,Alms1,Brd2,Cacna1d,Cd38,Cdkal1,Clock,Cpe,Crebbp,Cxcl12,Dnajc3,Ehd4,Foxo1,Gpr39,Grb10,Hipk3,Huwe1,Ildr2,Insr,Itgb1,Kmt2b,Kras,Lepr,Mib1,Osmr,Pbx1,Pttg1,Rictor,Rps6kb1,Rpsa,Sel1l,Senp1,Sidt2,Thbs1,Thra,Tle3
MP:0001923	reduced female fertility	0.00355	0.069	41	983	Mouse	Abca1,Acvr2a,Atad2b,Cables1,Cdk6,Dcn,Dido1,Dmd,Fancc,Foxo3,Fzd1,Ikbkg,Inhba,Kdm5b,Kit,Kmt2a,Kmt2b,Kmt2c,Large1,Lcn2,Lepr,Lmna,Lpp,Mbtps1,Nacc1,Ncoa2,Nfia,Nsmf,Polg,Por,Ptpn11,Pttg1,Rora,Scai,Sfrp4,Sp4,Tet3,Thra,Tns1,Ube3a,Ubr2
MP:0002968	increased circulating alkaline phosphatase level	0.00356	0.0691	31	983	Mouse	Acox1,Adcy6,Chd9,Cyb5d1,Elk4,Entpd5,Faf2,Fech,Insr,Lepr,Lmna,Map3k7,Mindy1,Mtmr3,Mysm1,Notch2,Rdx,Retreg3,Ric1,Rrad,Sh3pxd2a,Slc20a2,Slc25a4,Sod2,Thra,Tmem106b,Tmem127,Tppp,Ttc28,Xdh,Zbtb20
MP:0005335	abnormal gonadal fat pad morphology	0.0038	0.0733	17	983	Mouse	Cspg4,Fto,Gfra2,Gpam,Igf1r,Il1r1,Klf3,Lamp2,Lepr,Mbd5,Ncor1,Ntrk2,Pde3b,Pnrc2,Sh3pxd2b,Sprtn,Tmem18
MP:0001053	abnormal neuromuscular synapse morphology	0.0038	0.0733	17	983	Mouse	Cpeb4,Dmd,Dnmt3a,Dst,Dtna,Fat1,Gabpa,Gas7,Hspg2,Itgb1,Kalrn,Lama5,Mmp3,Nes,Syne1,Syne2,Utrn
MP:0002364	abnormal thymus size	0.00395	0.076	55	983	Mouse	Aff1,Arhgap5,Braf,Brd2,Bsg,Cbl,Cd2ap,Cdk6,Chd4,Col4a2,Crebbp,Cux1,Cycs,Dclre1c,Dock1,Erap1,Ets1,Fubp1,Gabpa,Hr,Ikbkg,Il6st,Kat6a,Klf13,Lama5,Lcn2,Lmna,Megf8,Msi2,Ncor1,Ndst1,Nfat5,Nfatc3,Nr3c1,Pbx1,Pdgfra,Prkdc,Prnp,Pttg1,Rictor,Rora,Rpl27a,Rps27l,Ryr2,Setd5,Sp4,Srsf2,Stk4,Tasp1,Traf6,Twsg1,Wrn,Wwox,Zbtb1,Zeb1
MP:0004881	abnormal lung size	0.004	0.0765	28	983	Mouse	Acan,Adgrf5,Cdc73,Col2a1,Cplane1,Creb1,Crebbp,Fat4,Fubp1,Gli3,Grb10,Greb1l,Itga3,Klf3,Kras,Lama5,Nr3c1,Pbrm1,Pbx1,Pcnt,Pdgfra,Por,Prrx1,Ptges3,Ptpn11,Sufu,Syne1,Trps1
MP:0002970	abnormal white adipose tissue morphology	0.00402	0.0765	45	983	Mouse	Adipor1,Alms1,Angptl2,Arhgap5,Ash1l,Braf,Cbl,Cdc73,Cdkal1,Chd2,Crebbp,Crtc1,Cspg4,Fto,Gpd2,Grb10,Ikbkg,Insr,Lamp2,Lcn2,Lepr,Lmna,Lnpep,Lrp1,Mbd5,Med13,Ncoa3,Ncor1,Ncor2,Nipbl,Nr2c2,Osmr,Phyh,Polg,Ptpn11,Rps6ka3,Sh3pxd2b,Sprtn,Steap4,Sufu,Tardbp,Tbl1xr1,Tns2,Wrn,Xdh
MP:0002083	premature death	0.00404	0.0765	145	983	Mouse	Acan,Ace,Adgrf5,Aff2,Atp2a2,Atxn1,Atxn7,Bcl2l11,Bmpr1a,Braf,C1galt1,C1qa,Cacna1c,Cd2ap,Cdc42,Cdc73,Cfh,Cflar,Chd2,Cmah,Col3a1,Col4a1,Crebbp,Csf1r,Ctnnb1,Cux1,Cxcl12,Cycs,Dnajc3,Dnmt3a,Dst,Ecm1,Egln1,Enpp1,Ep400,Erbb4,Ext1,F7,Fam210a,Fancm,Fat1,Fbxl20,Fn1,Foxo1,Foxo3,Fryl,Fto,Gucy1b1,Hr,Hspb7,Hspg2,Huwe1,Igf1,Il4ra,Il6st,Inhba,Ino80,Insr,Itgav,Itgb1,Itpkb,Kalrn,Kat6a,Kdm5b,Kirrel,Kit,Klf3,Kmt2a,Kr…
MP:0001954	respiratory distress	0.00405	0.0765	33	983	Mouse	Abca1,Acan,Adgrf5,Bmpr1a,Bsg,Cdc42,Col2a1,Col4a1,Cpeb4,Cyp26b1,Dgkd,Fgfrl1,Gli3,Grem1,Itgb1,Kcnj2,Kras,Lama5,Ldb3,Mecp2,Ndst1,Nr3c1,Pcyt1a,Pex5,Prrx1,Ptges3,Smpd1,Sox5,Sox6,Tnrc6c,Trps1,Tshz1,Zeb1
MP:0003720	abnormal neural tube closure	0.00406	0.0765	44	983	Mouse	Ago2,Alkbh1,Brd1,Brd2,Crebbp,Ddx3x,Dlc1,Dnmt1,Efna5,Exoc8,F2r,Fgfr1,Gli3,Gpr161,Ift172,Itgb1,Kmt2b,Krit1,Lama5,Lrp6,Luzp1,Map3k7,Marcks,Mdm4,Med12,Pdgfra,Pkn2,Por,Prrx1,Ptpn11,Qk,Rere,Rtel1,Setd2,Shroom3,Smad5,Specc1l,Sufu,Supt20,Trim28,Zeb1,Zeb2,Zfp148,Zfp568
MP:0009969	abnormal cerebral cortex pyramidal cell morphology	0.00408	0.0765	9	983	Mouse	Abl2,Braf,Dyrk1a,Fgf2,Jam3,Kalrn,Kat6b,Manba,Pdha1
MP:0012523	abnormal upper lip morphology	0.00408	0.0765	9	983	Mouse	Cplane1,Dzip1l,Ermp1,Gli3,Lrp6,Mau2,Ndst1,Nipbl,Zeb1
MP:0009288	increased epididymal fat pad weight	0.00408	0.0765	9	983	Mouse	Brd2,Cspg4,Kmt2b,Lepr,Ncor2,Osmr,Rictor,Rock1,Thra
MP:0004192	abnormal kidney pyramid morphology	0.0041	0.0767	8	983	Mouse	Ace,Cdc42,Col4a1,Lepr,Mmp17,Nfat5,Notch2,Tjp1
MP:0000164	abnormal cartilage development	0.00412	0.0768	29	983	Mouse	Acan,Bmpr1a,Cdc42,Chsy1,Col27a1,Col2a1,Creb3l2,Csf1r,Ctnnb1,Enpp1,Evc,Evc2,Ext1,Fgfr1,Glg1,Hspg2,Igf1,Itgb1,Kat6b,Ltbp3,Mbtps1,Nfix,Ntrk2,Pfn1,Prrx1,Slc26a2,Thra,Tnfrsf11a,Twsg1
MP:0001293	anophthalmia	0.00418	0.0777	19	983	Mouse	Acvr2a,Alkbh1,Chd2,Cnbp,Ctnnb1,Ermp1,Fat1,Frs2,Gli3,Ift172,Lama5,Lrp6,Megf8,Ndst1,Pcnt,Pfas,Sp1,Sufu,Twsg1
MP:0000245	abnormal erythropoiesis	0.00419	0.0777	24	983	Mouse	Ago2,Brd1,Ccbe1,Cflar,Chd2,Cpeb4,Dido1,Epb41,Fech,Il6st,Kat6a,Kit,Klf13,Kras,Lcn2,Maea,Ncor1,Picalm,Pou2f1,Ptpn11,Senp1,Srsf2,Tet2,Tmod3
MP:0001700	abnormal embryo turning	0.00422	0.0778	30	983	Mouse	Arnt,Cdh5,Ddx3x,Dlg3,Dnmt1,Epb41l5,Flt1,Fn1,Huwe1,Kmt2b,Krit1,Megf8,Pdgfra,Pkn2,Ptpn11,Ptprb,Qk,Rfx3,Rttn,Setd2,Smad5,Smg1,Sufu,Supt20,Tead1,Tjp1,Trim28,Ubr5,Zeb2,Zfp568
MP:0000157	abnormal sternum morphology	0.00422	0.0778	30	983	Mouse	Alkbh1,Ash1l,Bmpr2,Cdc42,Col27a1,Cplane1,Crebbp,Ctnnb1,Fat4,Fgfr1,Fgfrl1,Gli3,Hspg2,Irf6,Kmt2a,Lfng,Lmna,Megf8,Nipbl,Pcnt,Pdgfra,Sh3pxd2a,Sh3pxd2b,Sox5,Sox6,Sulf1,Tasp1,Trps1,Tshz1,Zeb1
MP:0004954	abnormal thymus weight	0.00424	0.0779	13	983	Mouse	Aff1,Braf,Bsg,Dclre1c,Ets1,Hr,Kat6a,Rictor,Rps27l,Ryr2,Srsf2,Tasp1,Wwox
MP:0002896	abnormal bone mineralization	0.0043	0.0789	31	983	Mouse	Alpl,Bmpr1a,Col1a2,Csf1r,Ctnnb1,Elk4,Enpp1,Gli3,Grem1,Hspg2,Igf1r,Il6st,Itgb1,Lmna,Mbtps1,Mysm1,Naca,Nfix,Notch2,Ric1,Rps6ka3,Sfrp4,Slc38a10,Slc39a14,Sox5,Stag1,Tbc1d2b,Thra,Tnfrsf11a,Trip11,Xbp1
MP:0008973	decreased erythroid progenitor cell number	0.00439	0.0802	14	983	Mouse	Brd1,Chd2,Eif2ak2,Ep400,Il6st,Irf2bp2,Kat6a,Kmt2a,Nr3c1,Picalm,Rcor1,Senp1,Sp1,Tmod3
MP:0004258	abnormal placenta size	0.0044	0.0802	17	983	Mouse	Ago2,Alkbh1,Birc6,Braf,Ddx3x,Ern1,Gjc1,Grb10,Lepr,Myh9,Notch2,Pdgfra,Plk2,Ptp4a2,Rictor,Ssr3,Sufu
MP:0003799	impaired macrophage chemotaxis	0.00444	0.0805	11	983	Mouse	Angptl2,Ccr2,Cmklr1,Flt1,Il33,Il4ra,Itga4,Myo9b,Ninj1,Plec,Rock1
MP:0002113	abnormal skeleton development	0.00444	0.0805	61	983	Mouse	Acan,Alpl,Atp2a2,Bmpr1a,Ccr2,Cdc42,Chsy1,Col11a2,Col27a1,Col2a1,Creb3l2,Crebbp,Csf1r,Ctnnb1,Cyp26b1,Enpp1,Evc,Evc2,Ext1,Fat4,Fgfr1,Fgfrl1,Gab2,Glg1,Grem1,Hspg2,Igf1,Il6st,Itgb1,Kat6b,Kmt2a,Lepr,Lfng,Lrp6,Ltbp3,Mbtps1,Naca,Nfix,Notch2,Nr3c1,Ntrk2,P2rx7,Pbx1,Pdgfra,Pfn1,Prrx1,Rarg,Sfrp2,Sh3pxd2b,Slc26a2,Slc39a14,Slc4a4,Smad5,Thra,Tnfrsf11a,Tob2,Traf6,Trip11,Twsg1,Wwox,Wwp1
MP:0000774	decreased brain size	0.0045	0.0813	40	983	Mouse	Akap13,Arhgef2,Arnt,Atxn1,Atxn7,Braf,Cep63,Cnbp,Cplane1,Ctnnb1,Cycs,Dst,Dyrk1a,Frs2,Hfe,Huwe1,Igf1r,Kat6b,Lrp6,Marcks,Mecp2,Ncam1,Nipbl,Pcnt,Pdha1,Pign,Ppp1r9b,Rere,Setd2,Smpd1,Sptb,Sun1,Syngap1,Tardbp,Tcf4,Trio,Trip11,Ube3a,Usp7,Zfp568
MP:0001548	hyperlipidemia	0.00461	0.0826	6	983	Mouse	Acox1,Lepr,Lmf1,Lpl,Lrp6,Wrn
MP:0009387	abnormal epidermal pigmentation	0.00461	0.0826	4	983	Mouse	Ece1,Ikbkg,Lmna,Rpl27a
MP:0009874	abnormal interdigital cell death	0.00461	0.0826	4	983	Mouse	Cdc42,Mib1,Sfrp2,Smoc1
MP:0008962	abnormal carbon dioxide production	0.00488	0.0866	10	983	Mouse	Cspg4,Foxo1,Fto,Lamp2,Lepr,Med13,Ncoa3,Ncor2,Nr2c2,Rps6kb1
MP:0003769	abnormal lip morphology	0.00488	0.0866	10	983	Mouse	Cplane1,Dzip1l,Ermp1,Gli3,Lrp6,Mau2,Mbd5,Ndst1,Nipbl,Zeb1
MP:0020135	abnormal heart ventricle wall thickness	0.00488	0.0866	28	983	Mouse	Atp2a2,Braf,Crk,Dlc1,Dmd,Erbb4,Foxp1,Hexim1,Hspb7,Il6st,Itgb1,Kras,Ldb3,Map3k7,Mdm4,Ncor2,Nfat5,Nr3c1,Pdgfa,Pmm2,Ptcd1,Ptpn11,Ryr2,Sod2,Sptbn1,Tead1,Trip11,Xbp1
MP:0003945	abnormal lymphocyte physiology	0.0049	0.0868	123	983	Mouse	Acaca,Adcy9,Ahnak,Akap13,Arhgef1,Arhgef12,Arhgef5,Ash1l,Bcl2l11,Bclaf1,Birc6,Braf,Bsg,C3ar1,Cabin1,Cbl,Cbx5,Ccr2,Cd244a,Cd2ap,Cd300c2,Cd38,Cdk6,Cflar,Chd4,Cmah,Crtc1,Cxcl12,Dclre1c,Dyrk1a,Ecm1,Eif2ak2,Erap1,Ets1,Foxo1,Foxo3,Foxp1,Gabpb2,Galnt1,Gon4l,Havcr2,Hr,Hsd17b11,Huwe1,Ikbkg,Ikzf2,Il15ra,Il1r1,Il33,Il4ra,Il6st,Itfg2,Itga4,Itpkb,Klf13,Kmt2d,Lama5,Lcn2,Lepr,Lrba,Lrrc32,Ly75,Map3k2,Map3k3,Map3k…
MP:0003055	abnormal long bone epiphyseal plate morphology	0.00499	0.0882	29	983	Mouse	Alpl,Cdc42,Chsy1,Col11a2,Col27a1,Col2a1,Creb3l2,Csf1r,Ctnnb1,Evc,Evc2,Ext1,Fgfrl1,Glg1,Hspg2,Igf1,Itgb1,Kat6b,Ltbp3,Mbtps1,Nfix,Ntrk2,Pfn1,Prrx1,Slc26a2,Slc4a4,Thra,Tnfrsf11a,Twsg1
MP:0002619	abnormal lymphocyte morphology	0.00504	0.0887	158	983	Mouse	Acaca,Ace,Aff1,Akap13,Anpep,Arap2,Arhgef1,Atp11a,Bcl2l11,Bclaf1,Bnip2,Braf,Bsg,C3ar1,Cbl,Ccl25,Ccr2,Cd5l,Cdk6,Cdkal1,Cflar,Chd2,Chd4,Chd9,Crebbp,Csf1r,Ctnnb1,Cux1,Cxcl12,Cycs,Dclre1c,Ddx42,Dnmt1,Dnmt3a,Dyrk1a,Egln1,Elk4,Entpd1,Entpd7,Ern1,Ets1,Fam110b,Fam160a1,Fcrls,Foxo1,Foxo3,Foxp1,Fubp1,Gabpa,Galnt1,Gdi2,Git2,Glb1l2,Gon4l,Havcr2,Hivep2,Hr,Hsd17b11,Hspa9,Huwe1,Ikbkg,Il15ra,Il1r1,Il33,Il4ra,Il6s…
MP:0012777	abnormal liver glycogen level	0.00507	0.0887	13	983	Mouse	Crebbp,Grb10,Il6st,Insr,Lamp2,Lepr,Lifr,Lmna,Ncoa3,Ncor1,Osmr,Prkab2,Ptpn11
MP:0001051	abnormal somatic motor system morphology	0.00508	0.0887	17	983	Mouse	Cpeb4,Dmd,Dnmt3a,Dst,Dtna,Fat1,Gabpa,Gas7,Hspg2,Itgb1,Kalrn,Lama5,Mmp3,Nes,Syne1,Syne2,Utrn
MP:0000628	abnormal mammary gland development	0.00508	0.0887	26	983	Mouse	Afap1,Anpep,Arhgap5,Arnt,Bcl2l11,Cbl,Crebrf,Csf1r,Erbb4,Gli3,Hr,Il6st,Itgb1,Kdm5b,Lbh,Mnt,Ncoa2,Ncoa3,Neo1,Nr3c1,Skil,Socs5,Tnfrsf11a,Ube3a,Xdh,Xiap
MP:0000075	absent neurocranium	0.00512	0.0892	5	983	Mouse	Gli3,Hspg2,Lama5,Ndst1,Shroom3
MP:0005620	abnormal muscle contractility	0.00518	0.0892	57	983	Mouse	Adcy6,Akap13,Anxa6,Arhgef1,Arhgef12,Arrb1,Atp1a2,Atp2a2,Bmpr1a,Bmpr2,Braf,Cacna1c,Cacna2d1,Camk2d,Cdc42,Clu,Col3a1,Col6a3,Dmd,Dst,Egln1,Entpd1,Erbb4,Fgf2,Gjc1,Igf1,Itgb1,Kdm4a,Klf3,Kras,Lamp2,Ldb3,Lepr,Lmna,Lpl,Lrp1,Map3k1,Myocd,Ngf,Nox4,Nr3c1,P2ry6,Pdha1,Pdlim5,Ptcd1,Ptpn11,Rora,Rrad,Ryr2,Sfrp2,Slc4a7,Smad5,Sod2,Srsf2,Thra,Xiap,Xirp1
MP:0001431	abnormal eating behavior	0.00518	0.0892	72	983	Mouse	Acan,Ace,Acot11,Adrb3,Afap1,Alms1,Atrx,Bclaf1,Bmpr1a,Brd2,Cbl,Cdc42,Cdkal1,Clock,Cpe,Cpeb4,Crtc1,Ctnnb1,Dnajc3,Evc,Fto,Gfra2,Gk,Gpd2,Gpr39,Gtf2a1,Il1r1,Inhba,Insr,Itgb4,Itpr3,Kcnj2,Ldb3,Lepr,Lmna,Lpar1,Lrp1,Marcks,Mnt,Naa40,Ncoa3,Ncor1,Ncor2,Nr2c2,Ntrk2,Osmr,P2rx7,Phf21a,Plec,Pnrc2,Ppp1r15b,Prrx1,Pttg1,Raph1,Rock1,Sel1l,Sh3pxd2a,Slc30a7,Sod2,Syne1,Syngap1,Tardbp,Tasp1,Thra,Tmem18,Trio,Trps1,Tshz1…
MP:0009655	abnormal secondary palate development	0.00519	0.0892	20	983	Mouse	Arhgap29,Cdc42,Col2a1,Crk,Fgfr1,Foxn3,Golgb1,Irf6,Itgav,Kcnj2,Luzp1,Map3k7,Mnt,Ncor2,Pbx1,Pdgfra,Prrx1,Sox5,Tshz1,Zeb1
MP:0001915	intracranial hemorrhage	0.00519	0.0892	20	983	Mouse	Alkbh1,Alpl,Birc6,Braf,C1galt1,Cdc42,Col18a1,Col4a1,Crebbp,Ctnnb1,Cycs,G3bp1,Hspg2,Itgav,Jam3,Pcnt,Por,Sufu,Tmsb4x,Wnk1
MP:0004883	abnormal vascular wound healing	0.00519	0.0892	14	983	Mouse	Abhd2,Ccr2,F2r,Ifi27,Igf1r,Il1r1,Lepr,Lrp1,Map3k1,Pappa,Pfn1,Rock1,Sorl1,Zeb1
MP:0005352	small cranium	0.00524	0.0897	9	983	Mouse	Col2a1,Evc2,Fgfr1,Fgfrl1,Lmna,Lrp6,Mbtps1,Mnt,Ptpn11
MP:0000333	decreased bone marrow cell number	0.00527	0.09	22	983	Mouse	Braf,Csf3r,Ctnnb1,Cxcl12,Dst,Ep400,Fancc,Fubp1,Gab2,Kat6a,Kit,Kmt2a,Msi2,Pbx1,Picalm,Prkdc,Ptpn11,Rpl27a,Rps27l,Sod2,Tnfrsf11a,Vcam1
MP:0002885	abnormal AMPA-mediated synaptic currents	0.0053	0.0902	7	983	Mouse	Cdc42ep4,Ext1,Gria4,Kalrn,Ppp1r9b,Rps6ka3,Syngap1
MP:0004857	abnormal heart weight	0.00542	0.092	44	983	Mouse	Ace,Atp1a2,Atp2a2,Cacna1c,Dyrk1a,Egln1,Epb41l5,F2r,Igf1r,Il17rd,Ino80,Kdm4a,Klf3,Lamp2,Lcn2,Ldb3,Letm1,Lmna,Lrp1,Mecp2,Mtus1,Myo6,Ncor1,Nox4,Nr3c1,Pdha1,Pdlim5,Polg,Por,Ppp2r3a,Ptpn11,Rhobtb3,Ric1,Rictor,Rrad,Ryr2,Slc25a4,Slc38a10,Smurf2,Sod2,Tmem106b,Tsc22d1,Usp24,Zfp14
MP:0003371	decreased circulating estrogen level	0.00543	0.092	8	983	Mouse	Abca1,Clock,Inhba,Kdm5b,Kmt2b,Ncoa3,Pdgfra,Vps54
MP:0009283	decreased gonadal fat pad weight	0.00545	0.0921	11	983	Mouse	Fto,Gfra2,Gpam,Lamp2,Lepr,Mbd5,Ncor1,Pde3b,Pnrc2,Sh3pxd2b,Sprtn
MP:0009388	abnormal epidermal melanocyte morphology	0.00558	0.0939	3	983	Mouse	Ece1,Lmna,Rpl27a
MP:0003277	increased esophageal papilloma incidence	0.00558	0.0939	3	983	Mouse	Atp2a2,Kit,Kras
MP:0002151	abnormal neural tube morphology	0.00566	0.0949	67	983	Mouse	Ago2,Alkbh1,Arnt,Bmpr1a,Brd1,Brd2,C2cd3,Cdc42,Cnbp,Col2a1,Crebbp,Ctnnb1,Ddx3x,Dlc1,Dnmt1,Efna5,Ep400,Epb41l5,Exoc8,F2r,Fat4,Fgfr1,Fn1,Gli3,Gpr161,Hipk2,Ift172,Itgb1,Kit,Kmt2b,Kras,Krit1,Lama5,Lrp6,Luzp1,Map3k7,Marcks,Mdm4,Med12,Mib1,Mkl2,Pcnt,Pdgfra,Pkn2,Pmm2,Por,Prrx1,Ptpn11,Qk,Rad17,Rad54l2,Rapgef1,Rere,Rtel1,Rttn,Setd2,Shroom3,Smad5,Specc1l,Sufu,Supt20,Trim28,Xbp1,Zeb1,Zeb2,Zfp148,Zfp568
MP:0002833	increased heart weight	0.00574	0.0961	33	983	Mouse	Ace,Atp1a2,Atp2a2,Cacna1c,Egln1,Epb41l5,F2r,Igf1r,Ino80,Klf3,Lamp2,Lcn2,Ldb3,Lmna,Lrp1,Mecp2,Mtus1,Myo6,Ncor1,Nox4,Nr3c1,Pdha1,Pdlim5,Polg,Ptpn11,Ric1,Rictor,Rrad,Ryr2,Slc25a4,Smurf2,Sod2,Zfp14
MP:0002633	persistent truncus arteriosis	0.00584	0.0973	17	983	Mouse	Bmpr1a,Bmpr2,Brd2,Cplane1,Dock1,Ece1,Foxp1,Kmt2d,Lama5,Lrp1,Mkl2,Ndst1,Pdgfra,Ptpn11,Setd5,Sh3pxd2a,Ssr1
MP:0001943	abnormal respiration	0.00593	0.0986	71	983	Mouse	Abca1,Acan,Adgrf5,Aff4,Alpl,Arhgap5,Atp1a2,Bmpr1a,Braf,Bsg,C3ar1,Ccr2,Cdc42,Cdc73,Chd2,Col27a1,Col2a1,Col4a1,Cpeb4,Cux1,Cyp26b1,Dgkd,Egln1,Fgfrl1,Git2,Gli3,Grem1,Hspb7,Hspg2,Igf1,Igf1r,Il33,Il4ra,Itga3,Itgb1,Itgb4,Kcnj2,Kit,Kmt2d,Kras,Lama5,Ldb3,Lepr,Lmna,Lyz2,Mecp2,Mxra7,Nalcn,Ndst1,Nr3c1,Ntrk2,Pcyt1a,Pdgfa,Pdgfra,Pex5,Podxl,Prrx1,Ptbp2,Ptges3,Rora,Setd7,Smpd1,Sox5,Sox6,Spred1,Tie1,Tmtc3,Tnrc6c,…
MP:0000733	abnormal muscle development	0.00599	0.0992	16	983	Mouse	Col6a3,Creb1,Ctnnb1,Dmd,Dock1,Fat1,Fgfrl1,Itgb1,Kmt2a,Lmna,Myof,Pdgfra,Rtel1,Slk,Tmsb4x,Trio
MP:0002873	normal phenotype	0.00601	0.0992	225	983	Mouse	2010111I01Rik,Ablim1,Acan,Adamts5,Adcy4,Adcy9,Adipor1,Ago1,Ago2,Ahnak,Akap13,Anp32e,Apobec1,Arnt,Atf7,Atp1a2,Axl,Bcl2l11,Bcr,Birc6,Bmpr1a,Bmpr2,Braf,Brd2,C1qa,Carmil1,Cbx1,Cbx5,Ccbe1,Ccl11,Cdc42,Cdh5,Cdkal1,Cdr2,Clcn5,Clock,Cobl,Col1a2,Col2a1,Cpeb4,Crebbp,Crk,Csf1r,Cspg4,Ctnnb1,Cxcl12,Dcn,Ddx3x,Dlc1,Dmd,Dnmt1,Eda2r,Emp1,Epb41l2,Epn2,Erbb4,Ern1,Evc2,Ext1,F7,Fam126a,Fam129a,Fbxl20,Fer,Fgfr1,Fgfrl1,…
MP:0005016	decreased lymphocyte cell number	0.00602	0.0992	117	983	Mouse	Acaca,Aff1,Akap13,Arhgef1,Bcl2l11,Bclaf1,Bnip2,Braf,Bsg,C3ar1,Cbl,Ccl25,Ccr2,Cd5l,Cdk6,Cdkal1,Cflar,Chd2,Chd4,Chd9,Crebbp,Csf1r,Ctnnb1,Cux1,Cxcl12,Cycs,Dclre1c,Ddx42,Dnmt3a,Dyrk1a,Elk4,Ets1,Fam110b,Fcrls,Foxo1,Foxp1,Fubp1,Gabpa,Galnt1,Git2,Glb1l2,Gon4l,Havcr2,Hivep2,Hr,Hspa9,Huwe1,Ikbkg,Il15ra,Il1r1,Il33,Il4ra,Il6st,Itfg2,Itga4,Itgav,Itpkb,Kat6a,Kdm7a,Kit,Klf13,Kmt2a,Kmt2d,Kras,Lama5,Lepr,Map3k3,…
MP:0009657	failure of chorioallantoic fusion	0.00602	0.0992	13	983	Mouse	Ddx3x,Epb41l5,Fn1,Itga4,Itgb1,Mib1,Rtel1,Setd2,Supt20,Tjp1,Ubr5,Vcam1,Zfp568
MP:0003411	abnormal vein development	0.00608	0.0996	15	983	Mouse	Adcy9,Atp11a,Braf,Brd2,Cdh5,Gli3,Hspb7,Hspg2,Mkl2,Pam,Ptprb,Setd5,Sh3pxd2a,Traf6,Wnk1
MP:0010420	muscular ventricular septal defect	0.00608	0.0996	15	983	Mouse	Atp11a,Bmpr2,Brd2,Col4a2,Cplane1,Fgfrl1,Hectd1,Megf8,Otud7b,Setd5,Sh3pxd2a,Sufu,Tent5c,Traf6,Trip11
MP:0001688	abnormal somite development	0.00611	0.0998	30	983	Mouse	Cdh5,Ctnnb1,Dnmt1,Epb41l5,Fgfr1,Fn1,Foxo1,Huwe1,Itgb1,Kmt2b,Kmt2d,Lfng,Lrp6,Mdm4,Med12,Mib1,Pbx1,Pdgfra,Pkn2,Ptpn11,Qk,Rad17,Rere,Rest,Rttn,Sufu,Sumo2,Supt20,Zeb2,Zfp568
